# Supplementary material for: Engineered Antiviral Sensor Targets Infected Mosquitoes
Source: PubMed Central journal article supplement — bioRxiv. 2023 Jan 27:2023.01.27.525922. Preprint. [Version 1] doi: 10.1101/2023.01.27.525922 (PMC9900881; doi:10.1101/2023.01.27.525922), 2023-01-27
Supplement: NIHPP2023.01.27.525922v1-supplement-23.pdf [file NIHPP2023.01.27.525922v1-supplement-23.pdf]

## Supplementary Information

**Fig. S1:** Schematic representation of the constructs generated in this study

**Fig. S2:** qPCR data of yellow-GFP

**Fig. S3:** Hatching rate from bidirectional crosses

**Fig. S4:** Assessment of yellow and GFP transcript reduction mediated by Ub:AeCasRx-NES

**Fig. S5:** CHIKV consensus sequences and target sites

**Fig. S6:** Virus challenge assays using Ub:CasRx-NLS

**Table S1:** RNA sequencing of Ub:CasRx-NLS lines. TPM value

**Table S2:** List of lines used in this study with qPCR data for Ub-CasRx-NES

**Table S3:** hatching data for Yellow

**Table S4:** RNA sequencing of crosses and parental line for yellow analysis (TPM)

**Table S5:** Hatching data for GFP

**Table S6:** RNA sequencing of crosses and parental line for GFP analysis (TPM)

**Table S7:** Differential Expression analysis Ub:CasRx-NLS Versus U6b:gRNAarray\_Yellow

**Table S8:** Differential Expression analysis Ub:CasRx-NLS Versus U6b:gRNAarray\_GFP

**Table S9:** List of downregulated gene in parental lines for yellow targeting

**Table S10:** List of downregulated genes in parental lines for GFP targeting

**Table S11:** Differential Expression Ub: CasRx Vs. transhets yellow targeting in egg

**Table S12:** Differential Expression U6b:gRNAarray Vs. transhets yellow targeting in egg

**Table S13:** Gene enrichment analysis for yellow targeting

**Table S14:** Differential Expression Ub: CasRx Vs. transhets yellow targeting in larvae

**Table S15:** Differential Expression Ub: CasRx Vs. transhets GFP targeting

**Table S16:** Differential Expression U6b:gRNAarray Vs. transhets GFP targeting

**Table S17:** Gene enrichment analysis for GFP targeting

**Table S18:** Hatching data for yellow targeting by Ub:AeCasRx-NES

**Table S19:** Hatching data for yellow targeting by Ub:AeCasRx-NES

**Table S20:** CHIKV target sites

**Table S21:** Primer sequences used in this study

**File S1:** Alignment of CHIKV consensus sequences used to identify target regions.

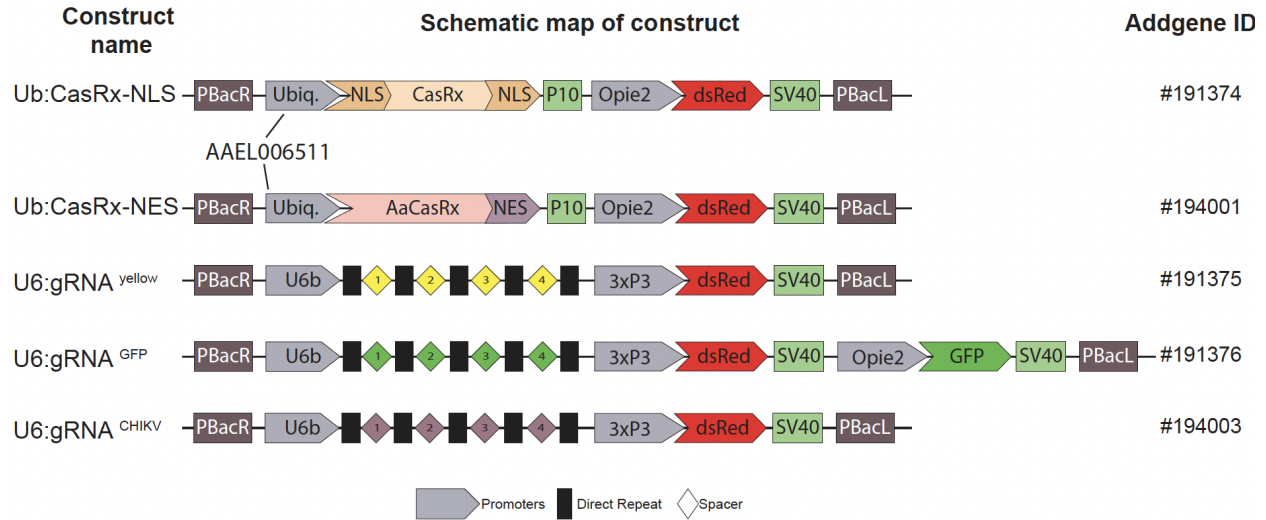

**Fig. S1: Schematic representation of constructs generated for this study.**

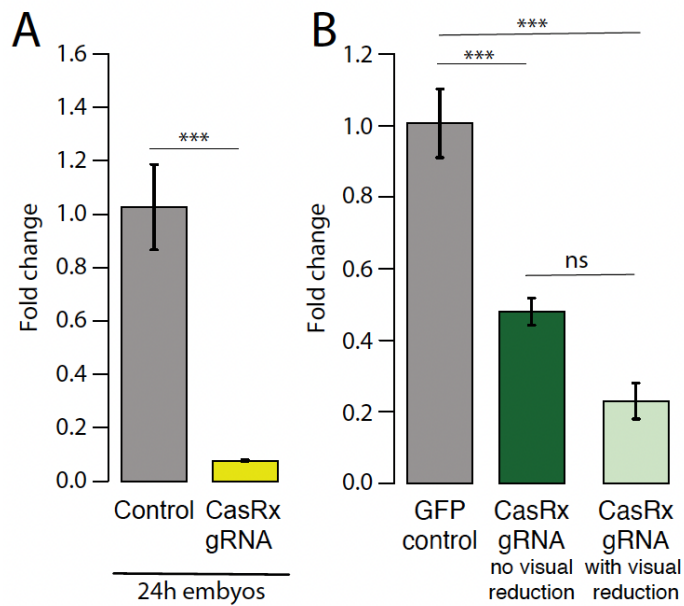

**Fig. S2: qPCR data validating RNaseq results. (A)** qPCR result for *yellow* gene in 24-hr-old embryos and surviving larvae. **(B)** GFP expression comparison in controls and transheterozygote larvae with and without visual reduction in GFP. Asterisks indicate significant reduction in hatching rate in transheterozygotes by one-way ANOVA with Tukey's multiple-comparison test ( $***P < 0.001$ ).

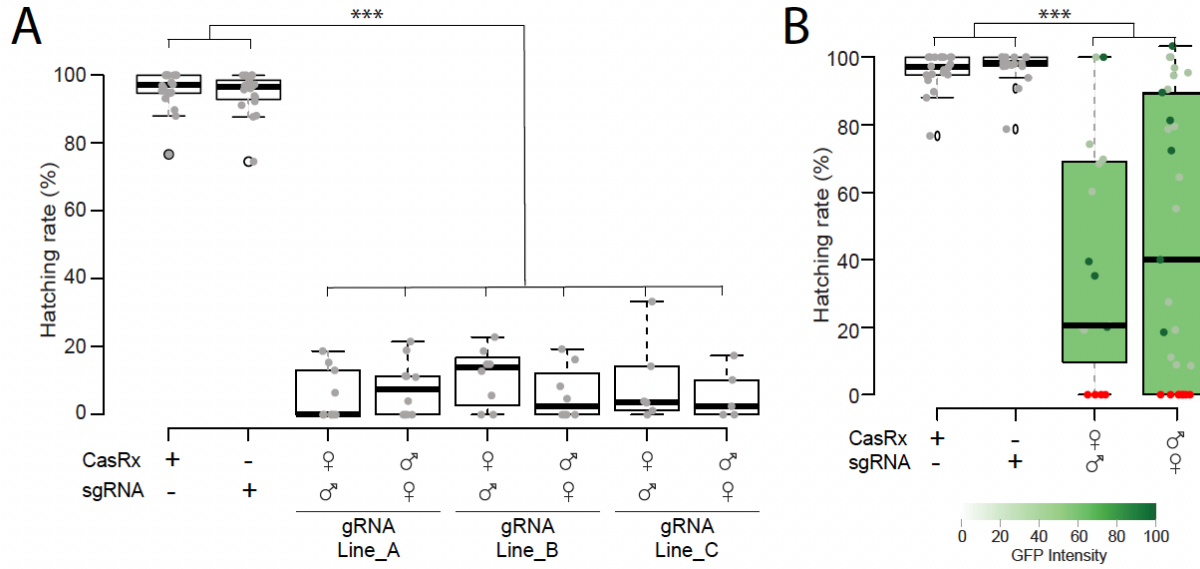

**Fig. S3: Hatching rate from bidirectional crosses.** (A) when targeting *yellow* gene and (B) when targeting GFP transgene. Phenotype penetrance is depicted by green shading in the box plot, with colors ranging from light green (low EGFP levels) to dark green (high EGFP levels). Red dots represent dead individuals and thus non quantifiable EGFP. Asterisks indicate significant reduction in hatching rate in transheterozygotes by one-way ANOVA with Tukey's multiple-comparison test ( $***P < 0.001$ ).

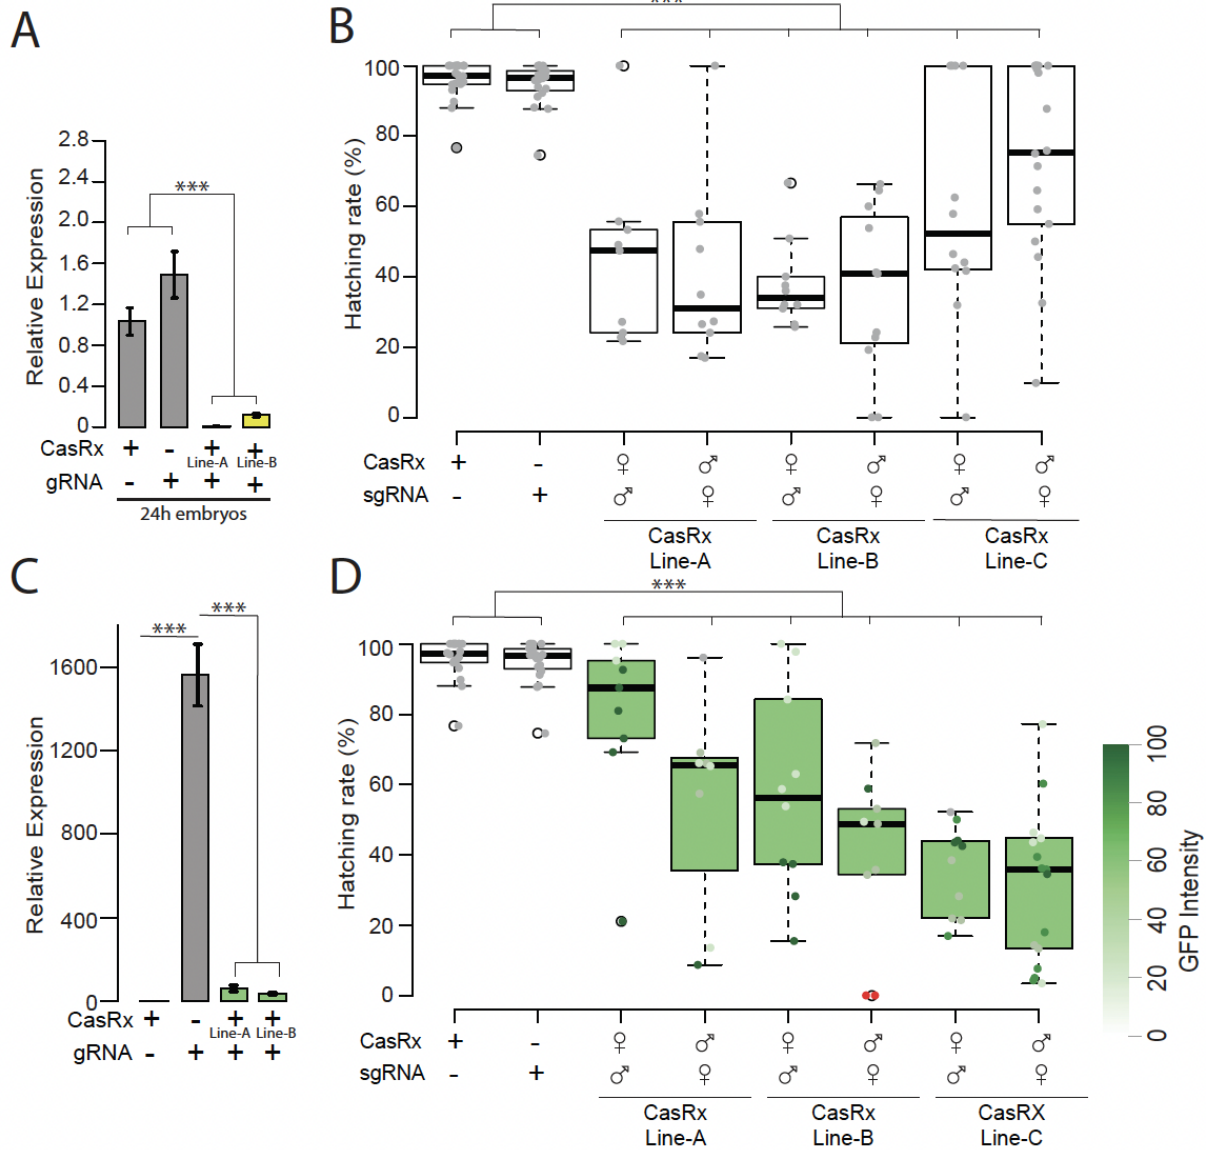

**Fig. S4: Assessment of yellow and GFP transcript reduction mediated by Ub:AeCasRx-NES.** (A) qPCR result for *yellow* gene in 24-hr-old embryos, (B) Hatching rate from bidirectional crosses using the three Ub:CasRx-NES lines A, B and C (table S2). (C) qPCR result for *GFP* gene in surviving larvae showing visual reduction in GFP expression. (D) Hatching rate from bidirectional crosses using the three Ub:CasRx-NES lines. Phenotype penetrance is depicted by green shading in the box plot, with colors ranging from light green (low EGFP levels) to dark green (high EGFP levels). Red dots represent dead individuals and thus non quantifiable EGFP. Asterisks indicate significant differences by one-way ANOVA with Tukey's multiple-comparison test (\*\* $P < 0.001$ ).

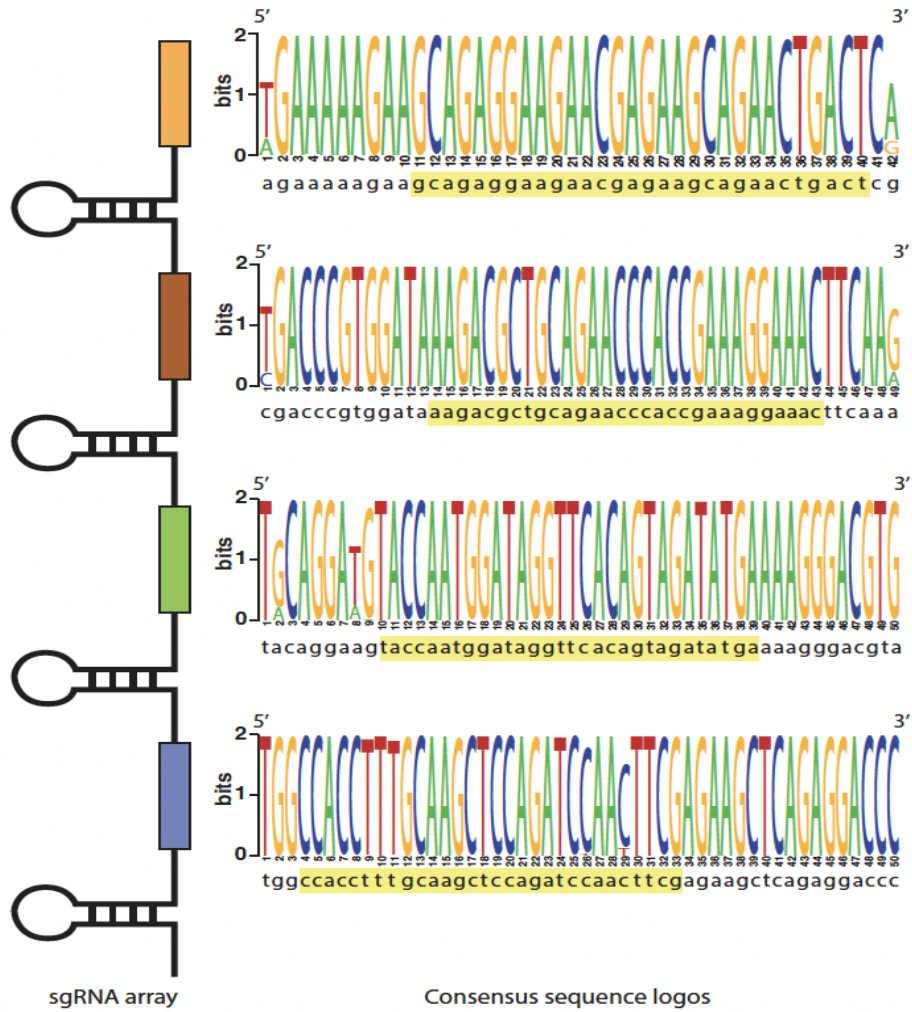

**Fig. S5: CHIKV consensus sequences of the target sites.** Consensus sequences were generated from conserved CHIKV genome regions aligned to the lab strain. They contain the 30nt target region (yellow highlight) used to design the gRNA employed in the study.

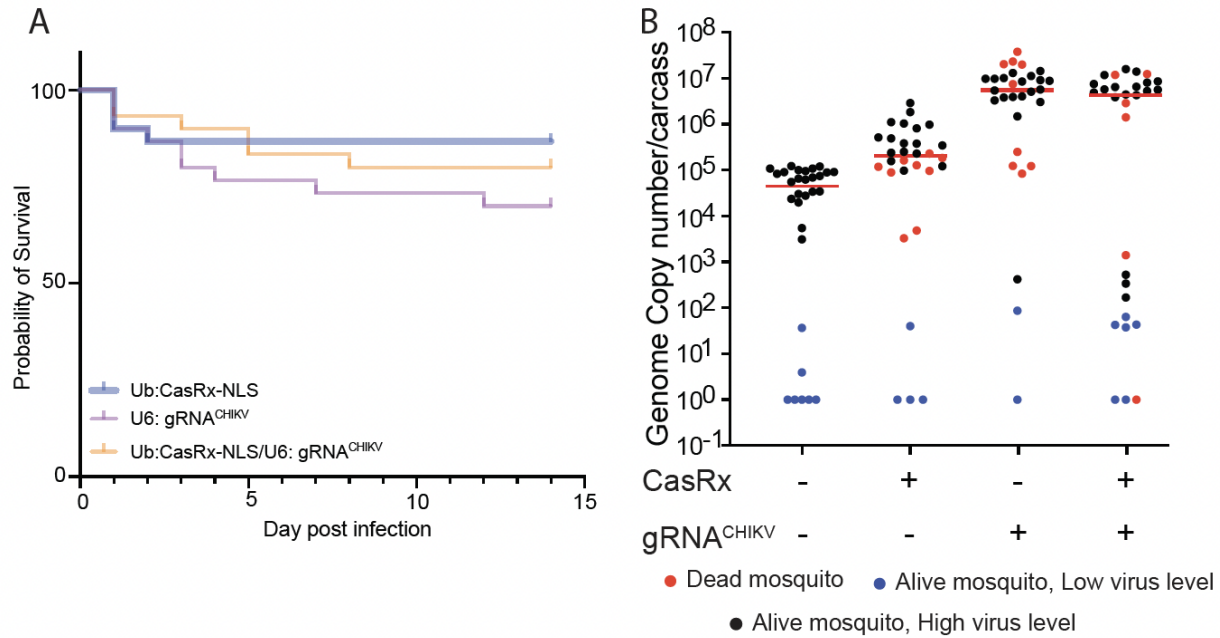

**Fig. S6: Virus challenge assays using Ub:CasRx-NLS.** (A) Adult survival curves (log-rank Mantel-Cox test) of CHIKV exposed females per treatment. No significant differences were found between Survival curves. (B) The viral genome copy number and infection prevalence of CHIKV were measured after an infected blood meal challenge (n = 30). qRT-PCR was used to assess genome copy number and infection prevalence in individual mosquitoes, with each dot representing the viral load from individual mosquitoes. Each pie-chart indicates the percentage of mosquitos that died by day 5 (in red), that are alive but with lower virus level of  $\leq 10^2$  (blue), or that have an high virus level (black). Horizontal red lines indicate the median of the viral loads. Considering the non-normal distribution of viral titers, the median was used to describe central tendency. The non-parametric Mann-Whitney test was used to compare median viral titers, and Fisher's exact test was used to compare infection prevalence. \* $P < 0.05$ , \*\* $P < 0.01$ , \*\*\* $P < 0.0001$ .
