# Supplementary material for: Engineered Antiviral Sensor Targets Infected Mosquitoes
Source: bioRxiv preprint, doi:10.1101/2023.01.27.525922, version 1 (2023-01-27)
Supplement: Table S1 [file 525922_file03.xlsx]

## Sheet: Sheet1
ID	Ub-CasRx_AL339	Ub-CasRx_AL340	Ub-CasRx_AL341	Ub-CasRx_AL342	Ub-CasRx_AL343
RfxCas13d	49.3049	4.50781	46.6729	1.53146	6.32681
gene0	1.82117	3.25883	1.07132	0	0.79774
gene1	0	0	0	0	0
gene10	3.70519	3.81019	3.03024	3.45109	3.17426
gene100	11.9096	15.9177	8.04615	10.3739	8.53062
gene1000	0	0	0.387674	0.299898	0.123895
gene10000	0.833093	0.744108	0.547951	0.317914	0.919364
gene10001	19.2259	22.6029	15.8879	19.6141	18.6971
gene10002	15.2455	19.8983	19.3205	16.8657	20.7329
gene10003	3.14229	4.05405	4.39191	2.59809	6.43999
gene10004	6.48839	4.20982	3.66371	4.25127	7.83579
gene10005	5.82194	8.76309	9.49339	6.26394	5.53249
gene10006	147.487	109.421	54.5911	79.5329	80.1751
gene10007	14.0766	6.71257	14.7315	8.46712	8.51923
gene10008	47.6731	58.5526	47.8821	59.4587	59.6494
gene10009	4.88432	4.77161	4.2165	3.39772	1.57212
gene1001	0	0.231384	0	0.148286	0.367562
gene10010	0	0.0994883	0.109893	0	0
gene10011	0.182343	0	0.0699605	0.162361	0
gene10012	0.653832	0.851657	0.37629	0.764115	0.450962
gene10013	0.13643	0.568668	0.31407	0.364438	0.301116
gene10014	37.5473	37.4556	40.9843	40.1193	48.8845
gene10015	0.10798	0.0803718	0.159799	0.257537	0.2213
gene10016	0.94548	0.591143	0.761792	1.42066	0.991219
gene10017	24.0417	22.8122	24.9729	22.1903	28.0412
gene10018	16.9422	19.7529	17.9825	15.0238	20.2292
gene10019	40.875	54.1093	43.1345	53.7085	73.2346
gene1002	2.78411	4.00163	4.69638	6.79592	6.14483
gene10020	38.191	38.122	35.9664	40.7899	46.1192
gene10021	0	0.0709054	0	0	0
gene10022	3.60781	2.68537	2.11872	4.91703	1.78758
gene10023	0.0607667	0.176275	0.211723	0.127226	0.0906207
gene10024	1.20035	1.10073	0.497389	0.769544	1.37764
gene10025	15.2965	14.2139	11.8877	14.8372	16.0038
gene10026	37.8553	36.1402	33.136	37.8447	38.6902
gene10027	46.6946	49.4185	42.2697	39.3039	47.5043
gene10028	2.17425	4.26482	1.03049	4.27057	2.82283
gene10029	49.1563	58.9084	57.1693	60.1865	62.186
gene1003	2.33787	1.20393	1.53322	2.10589	2.03998
gene10030	13.5459	15.0764	12.0781	14.4823	21.265
gene10031	0	0	0	0	0
gene10032	24.4871	32.7466	6.88976	19.8051	37.3816
gene10033	3.31218	2.95044	4.42732	4.85194	4.30367
gene10034	20.8581	28.5121	24.278	24.2588	31.9084
gene10035	43.0538	51.6453	35.9062	47.4227	53.185
gene10036	0.869476	1.20805	0.667194	0.387098	0.895546
gene10037	0.827484	0.21557	0.0396857	0.736805	0.837075
gene10038	0.100308	0	0	0.267947	0
gene10039	0.170721	0.5337	0.196505	0.456039	0.1884
gene1004	0.310419	1.26585	1.90561	2.62029	0.057094
gene10040	0.0263375	0.027445	0.0909458	0.105531	0
gene10041	1.19013	0.330715	2.00915	1.90749	1.48849
gene10042	0.439629	0.274869	0.506025	1.05692	0.776246
gene10043	0	0	0	0	0
gene10044	1.92778	2.08611	1.62153	1.98061	0.981884
gene10045	4.39926	2.46844	3.31086	3.72885	2.61413
gene10046	33.8245	31.1237	31.4403	31.8795	40.1444
gene10047	0.153127	0	0.176253	0	0
gene10048	1.06845	0.668025	0	0	0.589544
gene10049	0.580096	0.183642	0.562057	0.40701	1.36542
gene1005	0	0.335426	0.41373	2.14962	0
gene10050	0.505551	0	0	0.40192	0.332085
gene10051	36.8521	43.0306	32.3815	36.9155	35.5848
gene10052	0	0	0	0	0.232423
gene10053	0.102359	0.213327	0	0	0.225918
gene10054	2.07947	2.424	0.567956	2.54202	2.56707
gene10055	0.0699718	0.0729142	0	0.093456	0
gene10056	0	0.235369	0	0	0
gene10057	0.435202	0	0.50093	0.290633	0
gene10058	0.277235	0	0	0	0
gene10059	0	0	0	0	0
gene1006	29.2358	27.56	22.6886	34.2174	25.9437
gene10060	6.2394	1.48142	3.09087	2.74267	1.74317
gene10061	11.5476	9.52188	13.2916	8.58335	9.52982
gene10062	0	0	0	0.0884448	0
gene10063	21.2378	22.1308	16.407	22.4881	27.5544
gene10064	8.72677	7.00322	11.1993	5.89483	5.53475
gene10065	0	0	0	0	0
gene10066	86.4288	85.5756	66.9169	83.6011	93.7763
gene10067	27.7084	27.7601	24.7602	29.1117	31.6782
gene10068	53.5859	49.3838	48.2497	54.7467	46.6015
gene10069	1.61172	1.10601	2.44335	0.945069	1.95215
gene1007	17.1636	18.8469	19.1185	21.2397	24.3041
gene10070	4.07687	2.92416	9.56802	3.32367	6.25192
gene10071	16.3786	8.80601	33.8688	8.23246	24.5642
gene10072	25.0658	37.1726	20.3479	10.3607	17.3539
gene10073	0.189804	0.593355	0.21847	0	0
gene10074	5.60623	4.13031	3.16481	4.10161	4.33469
gene10075	0.450052	0.487888	0.0710193	0.315093	0.124164
gene10076	1.79954	0.986956	1.09017	1.51801	1.35877
gene10077	3.74116	2.93575	2.10058	3.38197	3.23489
gene10078	8.31351	5.93763	3.33306	7.3609	4.74183
gene10079	0	0	0.22326	0	0
gene1008	0	0	0.729688	0.177705	0
gene10080	36.0345	32.4071	30.0619	40.3315	40.3093
gene10081	5.50075	6.36896	9.02828	7.21088	6.18279
gene10082	0.525368	1.91611	0.302357	0.701695	0.724716
gene10083	13.9158	15.6956	12.7487	14.0703	18.9063
gene10084	18.3557	18.2879	16.7993	20.2709	19.5155
gene10085	9.08106	10.5444	11.3485	8.31695	8.30348
gene10086	80.8653	76.4634	85.8389	84.4045	110.723
gene10087	0.674409	2.34725	5.43385	0.450379	7.18943
gene10088	26.0149	23.2361	23.9923	25.8977	29.957
gene10089	15.976	7.88959	8.07507	12.4316	13.4144
gene1009	31.638	43.3404	36.8254	39.8825	61.5903
gene10090	0.373886	0.909086	0	0.499371	0.412603
gene10091	17.0818	18.8576	4.28274	8.24499	15.9578
gene10092	16.9715	20.1503	9.47135	14.8369	14.6426
gene10093	4.80969	10.2327	2.76805	4.72874	7.8142
gene10094	11.2655	14.1255	7.6951	12.7771	13.6549
gene10095	0	0	0	0	0
gene10096	0	0.247108	0	0	0
gene10097	0	0	0	0	0
gene10098	0	0	0	0	0
gene10099	0	0	0	0	0
gene101	30.9661	41.663	22.184	32.0102	30.3461
gene1010	3.9328	4.46518	1.89178	4.07676	3.82185
gene10100	0	0.243465	0	0.312056	1.28917
gene10101	1.63599	0.85239	0	0	1.8054
gene10102	0	0	0	0	0
gene10103	8.11692	12.0992	8.9097	10.3386	10.9151
gene10104	27.4633	25.4702	22.1277	26.0433	36.6718
gene10105	14.3792	18.4837	16.3093	14.7193	15.1733
gene10106	12.2743	18.1558	18.3083	10.0697	18.2127
gene10107	27.663	31.6748	25.1984	32.3602	36.0195
gene10108	72.5369	73.3484	67.6337	71.7855	89.334
gene10109	45.6096	59.4094	60.9174	40.2284	72.1751
gene1011	1.48388	3.60797	5.97794	2.31222	1.63754
gene10110	18.43	19.814	12.5128	20.8165	27.5623
gene10111	17.3398	16.3344	13.8912	14.6368	13.6244
gene10112	1.72545	1.84795	1.32403	2.0485	1.69256
gene10113	7.1914	8.30394	5.18276	6.92253	7.25688
gene10114	3.08557	2.08787	1.61435	1.60565	2.34377
gene10115	0	0	0	0.275802	0.22788
gene10116	28.6265	29.8303	29.7847	34.5247	28.4955
gene10117	0.281753	0.1468	0	0.376316	0
gene10118	0	0	0	0	0
gene10119	0	0	0	0	0
gene1012	24.7149	41.8322	54.9282	40.819	27.192
gene10120	9.20676	9.78111	11.0797	17.7654	9.48282
gene10121	63.6262	77.8931	75.4288	92.5812	105.536
gene10122	5.88691	5.63369	7.19086	7.06039	7.82235
gene10123	0.308202	0.0522215	0.0721036	0.234268	0.207389
gene10124	27.3723	21.0602	26.3117	22.2761	25.7678
gene10125	10.19	9.15842	10.4246	4.4467	13.4797
gene10126	0.258051	0.717072	0.49504	0.574431	0.949243
gene10127	40.9878	31.9481	39.8183	28.905	41.7946
gene10128	2.32246	1.54619	2.00491	1.89562	2.34938
gene10129	45.6638	51.5207	45.9666	50.0541	48.1109
gene1013	0.169508	0.169054	0.280346	0.220111	0.112426
gene10130	0.395581	0.681741	0.415047	0.37594	0.733732
gene10131	0.393093	0.322993	0.357953	0.202882	0.34772
gene10132	5.05035	5.06388	2.76745	5.11425	4.35198
gene10133	6.66456	5.40152	4.79748	7.29063	6.84104
gene10134	43.7887	53.6293	42.6861	48.8099	54.5276
gene10135	38.412	41.6375	32.1436	37.5934	68.0915
gene10136	5.84076	5.65925	2.71274	5.61129	3.16626
gene10137	61.5359	60.8721	43.5105	55.1342	52.667
gene10138	0.516101	0.268902	0.148512	0.861647	0.284773
gene10139	3.6825	3.09464	5.40088	3.41117	2.88402
gene1014	0	0	0	0	0
gene10140	2.74303	1.27039	0.350812	0.407073	1.34537
gene10141	2.5471	1.17965	0.325754	0	3.74782
gene10142	16.1656	16.8454	13.1344	7.62041	18.3643
gene10143	6.21699	1.47237	1.95162	1.50974	1.55927
gene10144	11.6328	9.58484	3.42528	7.22656	10.4491
gene10145	1.05219	0.274109	1.2111	1.054	3.19316
gene10146	26.4586	31.3487	13.7389	24.4743	19.4169
gene10147	0.193922	0.0803435	0.268927	0.78014	0.257835
gene10148	1.05157	0.782704	0.345824	0.200643	0.33156
gene10149	55.8014	58.7851	56.1344	59.6238	59.2179
gene1015	30.2056	28.6642	29.541	33.9271	31.2275
gene10150	35.7101	66.812	17.4378	45.3467	33.8849
gene10151	21.584	30.979	31.9922	20.1253	56.0647
gene10152	0	0	0	0.28898	0
gene10153	3.54861	5.9512	4.14837	5.92451	10.3409
gene10154	2.3523	4.16706	4.19672	2.35634	2.98527
gene10155	0.155792	0.101081	0	0	0
gene10156	16.1505	12.4256	15.9836	10.6847	7.16249
gene10157	31.6623	44.0571	26.4896	46.8199	50.3087
gene10158	1.43434	1.88216	1.0395	2.1286	1.70013
gene10159	0.320714	0.2228	0.246101	0	0.353925
gene1016	159.692	159.507	145.701	174.21	171.981
gene10160	18.4459	16.7912	15.0086	14.1591	23.8657
gene10161	0.318581	0	0	0	0
gene10162	0.163866	0	0	0	0
gene10163	0.417297	0.217423	0.240161	0.139338	0.115128
gene10164	5.2218	5.01179	5.14051	1.56005	8.03722
gene10165	2.20086	2.14384	1.10142	1.03842	1.10879
gene10166	110.397	116.019	101.078	106.314	106.116
gene10167	199.032	190.112	140.271	198.744	182.449
gene10168	5.77905	6.56952	5.44243	2.10508	8.11681
gene10169	1.0421	1.22166	2.0991	1.9138	2.30003
gene1017	80.5195	75.2889	83.6307	84.1884	82.5748
gene10170	5.202	4.60018	3.62555	5.73682	4.39769
gene10171	21.1099	27.4015	21.9899	25.459	25.0211
gene10172	30.0953	37.7643	23.9401	29.8839	37.385
gene10173	38.155	38.5266	29.0514	31.7352	37.1012
gene10174	18.3007	19.9736	15.0225	23.6067	19.7707
gene10175	1.31927	2.31536	1.19883	1.15924	1.84974
gene10176	7.28423	9.50696	7.76176	7.94695	7.40183
gene10177	35.1742	40.4766	33.3316	38.5961	40.8913
gene10178	6.38149	4.66271	3.64671	6.45763	3.778
gene10179	17.3164	19.7189	16.3015	18.7569	22.0647
gene1018	0.850298	1.89615	2.20211	1.04104	1.09474
gene10180	9.17979	10.2332	9.33758	9.04282	12.52
gene10181	0.920093	0.910845	0.900196	0.522282	1.01537
gene10182	0.19599	0.0214318	0.0557014	0.0727138	0.186914
gene10183	1.83441	0.981604	1.36959	1.85411	0.930115
gene10184	0.353368	0.206869	0	0.132575	0.512645
gene10185	15.6339	18.7976	20.9612	17.439	26.7324
gene10186	71.8312	32.8753	92.5275	49.7552	90.6782
gene10187	6.69485	4.78011	11.9871	7.4515	3.55725
gene10188	46.675	28.0393	30.7211	36.404	39.8806
gene10189	0.206084	0.13607	0.46726	0.231353	0.169588
gene1019	5.85179	11.5859	7.22279	9.13928	8.75459
gene10190	31.6864	36.5566	26.2096	30.9312	30.7038
gene10191	15.0612	16.6645	13.6999	13.8251	14.4421
gene10192	38.7966	35.0098	32.4562	30.4496	44.1383
gene10193	0.200589	0.104512	0.0865813	0.100467	0.0553402
gene10194	21.3956	24.6487	21.2066	25.0838	29.9076
gene10195	78.0349	90.0256	77.9425	97.163	81.8805
gene10196	17.8414	17.498	17.6023	17.9221	19.0271
gene10197	0.903708	0.94171	0	0.5945	0
gene10198	4.35736	4.41516	3.62997	4.66227	3.82562
gene10199	0.668091	1.16031	1.70716	1.18976	2.45758
gene102	0	0	0	0	0
gene1020	171.664	207.397	166.124	183.611	291.238
gene10200	2.93932	3.58936	2.90748	3.4351	5.3217
gene10201	34.2505	37.4277	29.3276	39.0668	41.1259
gene10202	54.5387	67.8896	50.6516	64.0375	72.5423
gene10203	0.554131	0.474065	1.18115	0.456859	1.50991
gene10204	0.21321	0.479899	0.368116	0.284769	0.588222
gene10205	0.116439	0.568927	0.405051	0.224638	0.816667
gene10206	0.980206	1.29814	0.725942	0.959723	1.63118
gene10207	1.53787	0.53418	0	0.684673	0.848562
gene10208	4445.34	4226.5	4475.4	4995.25	4390.6
gene10209	85.5161	91.2856	92.3205	76.7359	100.858
gene1021	4.43108	4.82744	4.12266	4.03279	5.55375
gene10210	0.347473	0.362084	0	0	0.127818
gene10211	0.340221	0.177264	0.0979009	0.113602	0.187726
gene10212	8.94514	10.4692	8.11516	10.7408	7.87771
gene10213	51.5541	57.7172	39.159	50.7015	44.4171
gene10214	47.4945	52.4847	51.1254	40.9655	54.3373
gene10215	0.0756411	0	0	0	0.0238497
gene10216	8.00355	7.18405	7.70733	9.84302	10.1441
gene10217	37.0077	42.4473	36.4427	42.861	47.2373
gene10218	0.15148	0.078925	0.087179	0	0
gene10219	48.393	58.1251	39.2235	55.9898	65.5894
gene1022	8.49768	6.00547	3.7229	5.18395	10.3836
gene10220	0	0	0	0	0.0305588
gene10221	5.45364	7.37064	6.69578	10.0652	10.8331
gene10222	33.0388	33.9342	28.7971	33.4292	39.8801
gene10223	92.4502	89.139	91.5618	99.7329	122.541
gene10224	11.094	9.35853	7.60092	8.11432	15.4493
gene10225	44.3547	58.099	42.7833	52.4861	58.9589
gene10226	31.1556	22.9689	21.1425	21.4194	25.572
gene10227	16.0924	18.4524	12.5591	16.405	22.6022
gene10228	59.5812	63.1628	56.0525	55.1742	82.6711
gene10229	0.989745	0.528376	2.57114	0.711807	1.00822
gene1023	29.6276	34.3543	24.908	31.9093	26.2047
gene10230	0.701186	0.786877	1.36584	1.22468	0.654752
gene10231	0.179842	0.187405	0.258755	0.180151	0
gene10232	1.26005	2.18839	3.86761	1.34636	1.48323
gene10233	147.977	73.4572	64.6014	89.0118	92.3037
gene10234	5.05119	4.65155	2.70422	4.39307	2.72232
gene10235	5.08334	3.56979	3.05273	3.39472	6.58535
gene10236	0	0	0	0	0
gene10237	2.49071	2.68814	0.819108	2.37618	1.57065
gene10238	218.392	230.546	224.779	235.676	291.511
gene10239	34.637	42.7693	34.3624	43.9803	49.1584
gene1024	41.8632	53.2645	40.5169	54.513	66.4224
gene10240	39.037	45.8092	32.339	40.8133	47.7367
gene10241	0.134473	0.667275	0.184265	0.0855264	0.204931
gene10242	14.7449	18.4012	10.4677	16.038	11.8872
gene10243	10.1958	14.5894	14.815	9.25057	16.8611
gene10244	0.717673	0.290831	1.8513	2.27174	0.791991
gene10245	0.746289	0.125431	0.548652	0.482304	0.355995
gene10246	188.144	191.849	144.617	163.667	166.411
gene10247	0.343539	0.465381	1.43618	1.3912	0.492849
gene10248	5.73737	7.30722	6.35929	4.54102	6.3315
gene10249	59.2457	65.6375	58.8367	63.7334	68.7006
gene1025	0	0	0	0	0
gene10250	0.101702	0	0	0	0.185186
gene10251	22.4309	22.575	18.9778	20.9971	21.157
gene10252	3.94571	4.38574	2.4222	2.81066	3.04802
gene10253	12.774	12.0273	10.2997	11.6917	12.7372
gene10254	4.33751	13.212	1.72821	9.35839	16.017
gene10255	93.4123	101.498	94.7328	98.0396	129.285
gene10256	10.895	23.6563	9.86443	15.3431	8.78649
gene10257	0	0.054746	0.0335952	0	0.0515353
gene10258	0	0	0	0	0
gene10259	0	0	0	0	0
gene1026	0.17908	0.979707	0.772975	0.478368	0.494062
gene10260	0	0	0	0	0
gene10261	0	0	0	0	0
gene10262	0	0	0	0	0
gene10263	0	0	0	0	0
gene10264	0	0	0	0	0
gene10265	0	0	0	0	0
gene10266	0	0	0	0	0
gene10267	0	0	0	0	0
gene10268	0	0	0	0	0
gene10269	0	0	0.262478	0	0.503304
gene1027	0	0	0	0	0
gene10270	0.0310503	0	0.0357398	0.0352509	0
gene10271	4.07177	7.44414	8.62447	8.39252	4.5982
gene10272	2.21143	3.66613	1.38841	3.35642	2.99508
gene10273	5.58877	1.8219	1.33307	0.90569	6.77832
gene10274	10.4156	3.23121	4.17862	3.22189	18.3959
gene10275	0	0	0	0	0
gene10276	3.81821	1.32626	1.7433	2.34829	5.885
gene10277	1.69135	0.195831	0.865243	0.502003	3.733
gene10278	12.2195	9.67624	10.2854	12.3664	9.14836
gene10279	6.30418	10.8451	6.97154	10.6571	9.45174
gene1028	5.58846	2.93307	4.29393	2.41117	10.1645
gene10280	195.639	199.09	174.573	191.202	224.327
gene10281	40.9735	47.1389	40.0738	47.9241	54.7564
gene10282	9.21187	10.2101	10.6031	9.95474	11.3672
gene10283	12.3472	13.4425	12.9392	13.6606	17.1847
gene10284	0.946186	1.10283	1.2101	1.45097	0.850803
gene10285	0	0	0	0	0
gene10286	0	0.302776	0	0	0.349796
gene10287	1.41086	0.808601	0.649574	0.847968	1.32341
gene10288	5.57595	6.64545	3.99689	4.86086	5.08482
gene10289	0	0	0	0.640639	0.529326
gene1029	20.4307	25.2905	21.6223	28.3865	27.6911
gene10290	4.60302	3.27571	4.39364	3.14893	6.19474
gene10291	393.553	515.977	411.156	476.391	722.821
gene10292	3.80367	4.0627	5.58212	6.09632	5.03706
gene10293	57.4973	56.5865	54.5852	44.961	41.4874
gene10294	19.7458	19.9854	17.3994	20.5684	15.1179
gene10295	2.92209	1.90955	1.48218	2.91057	2.24088
gene10296	12.9886	10.5638	12.6409	11.7063	11.0707
gene10297	0.769837	0.156954	0.115579	0.536459	0.221624
gene10298	28.1944	14.0545	22.247	35.0255	27.1277
gene10299	22.9706	22.4334	11.7049	15.9902	17.6689
gene103	390.401	76.185	122.104	163.386	122.868
gene1030	42.8772	44.9363	48.7873	46.7661	43.3856
gene10300	8.31665	7.18163	5.34788	8.81187	6.87059
gene10301	0	0	0	0.341876	0
gene10302	0	0	0	0	0
gene10303	0.185272	0	0	0	0
gene10304	0.281813	0.209759	0.278035	0.483938	0.666419
gene10305	0.626905	0.366517	1.52521	0.925448	0.327706
gene10306	5.30128	5.68668	4.30724	5.18023	3.9145
gene10307	68.2579	40.2953	25.0145	36.5213	40.7595
gene10308	24.905	11.7965	11.2928	15.6238	17.4898
gene10309	2.03806	1.67666	1.1112	2.43555	2.24911
gene1031	35.3615	39.4722	36.3602	40.0537	43.9361
gene10310	1.51692	0.790352	0	0.506508	0.4185
gene10311	0.136137	0.567446	0	0.181828	0
gene10312	0	0.205795	0	0	0
gene10313	0.187188	0	0	0.250013	0.206572
gene10314	9.7411	5.80041	8.54269	9.541	11.1593
gene10315	70.0252	71.2923	67.2337	68.9553	73.2161
gene10316	2.26554	0.733766	0.0352393	0.682058	0.743288
gene10317	30.2377	30.8073	20.5898	27.8905	28.4132
gene10318	8.02986	8.81578	5.00641	9.19275	7.91195
gene10319	14.6649	16.6023	12.3909	13.803	15.3646
gene1032	0	0	0.0466059	0	0
gene10320	24.2638	25.8552	18.5021	27.2027	28.7586
gene10321	0	0	0	0.20224	0
gene10322	19.1114	22.8229	17.3256	23.2667	19.7839
gene10323	1190.38	876.33	1129.02	1146.04	846.069
gene10324	4.92867	8.15151	2.96664	6.22049	3.96702
gene10325	11.1499	12.9413	5.73873	10.5334	10.1538
gene10326	0	0	0	0	0
gene10327	0.69847	0.935795	1.49307	1.06616	1.21126
gene10328	23.5222	13.6807	18.6795	16.0737	28.7752
gene10329	30.0126	6.31974	3.93781	6.854	11.4978
gene1033	36.8042	106.611	42.8485	41.039	36.144
gene10330	115.99	96.9051	181.118	83.0615	151.463
gene10331	0.949191	0.359675	0.297967	0.922009	1.23794
gene10332	15.0075	17.1609	17.274	13.8359	28.4331
gene10333	23.3323	23.7887	23.958	22.8679	32.0466
gene10334	141.53	149.676	117.185	144.901	156.266
gene10335	27.7374	29.3644	32.4353	30.8477	36.5853
gene10336	0.510217	0	0.146819	0.170365	0
gene10337	1.85817	1.54904	0.748581	1.30295	1.69173
gene10338	0.45012	0	0.102934	0.135368	0.101978
gene10339	0.300448	0.939245	0.345824	0.200643	0.16578
gene1034	4.38924	2.40546	2.44013	2.6427	2.62542
gene10340	0.518211	0.540002	0.298238	0.173034	0.142968
gene10341	8.34137	64.9144	27.1015	42.2343	26.7786
gene10342	3.39613	48.6604	26.386	38.5556	11.2434
gene10343	4.2107	7.09355	3.95809	3.37435	3.94973
gene10344	1.51581	1.10568	0.174474	0.607365	1.05942
gene10345	27.8894	47.8896	12.0305	24.4473	26.4303
gene10346	2.93296	1.87797	0.935498	1.5575	1.20888
gene10347	25.8372	28.1727	27.44	26.5042	45.4147
gene10348	22.9951	27.1029	20.7603	27.2065	34.1212
gene10349	28.4631	25.8004	30.3522	25.7562	34.4761
gene1035	0	0.438453	1.45292	1.12395	0.464331
gene10350	0	0	0	0	0
gene10351	1.11013	2.69317	1.61418	2.51683	1.9303
gene10352	15.1624	16.1847	10.393	11.4909	14.1318
gene10353	74.8247	71.4654	51.1247	66.4177	58.168
gene10354	35.6237	35.9314	29.623	34.2308	43.2124
gene10355	25.5823	28.4606	26.0403	27.7238	38.1276
gene10356	10.0726	7.48244	9.87203	8.39164	13.647
gene10357	1.52479	2.74448	2.07419	2.22169	2.60052
gene10358	84.2554	95.6845	87.1334	92.9332	120.867
gene10359	0.0383125	0	0.0926075	0.0347964	0.0287504
gene1036	0	0	0	0.531409	0.219537
gene10360	46.4893	49.3713	43.2692	48.1289	45.6576
gene10361	7.23058	5.25441	6.07769	5.33695	7.50688
gene10362	2.39452	0.840114	0	0.667246	0.600737
gene10363	0.465041	0.455069	0.0959275	0.231529	0.235446
gene10364	11.9233	8.73422	8.15294	9.30279	15.3728
gene10365	2.79681	3.21591	1.5541	1.93215	3.51215
gene10366	0.8072	0.804572	0.484753	0.656245	0.697139
gene10367	32.5539	31.5423	34.5123	32.0377	38.6036
gene10368	13.947	15.7987	12.6492	15.8421	16.5593
gene10369	49.2524	51.0941	30.4154	46.3714	43.1744
gene1037	0	0	0.676333	0.5232	0
gene10370	0	0	0	0	1.45748
gene10371	0.239526	0	0	0.319916	0.153311
gene10372	67.9956	62.4642	52.667	58.3821	56.7008
gene10373	15.2147	10.3054	7.88063	9.14449	11.4173
gene10374	27.4039	22.3691	24.7085	17.6907	25.8063
gene10375	1.19011	1.37546	1.23388	1.15141	1.75185
gene10376	1.10281	1.31001	1.16368	1.06067	1.67298
gene10377	17.0349	19.36	18.1318	18.6631	21.0802
gene10378	46.7251	40.822	40.5569	31.2767	49.5108
gene10379	33.0573	45.9779	34.0698	37.6864	43.8835
gene1038	1.29828	1.35287	1.52756	1.65694	0.509412
gene10380	32.8363	33.2882	34.0331	31.5532	34.843
gene10381	0	0.100564	0.134063	0.468914	2.26403
gene10382	1.01663	1.21073	0.585088	0.969887	1.04178
gene10383	2.82158	2.51342	1.99054	1.39802	2.46088
gene10384	21.7094	23.8356	24.8988	25.6778	26.1847
gene10385	28.755	25.4126	24.0902	22.3629	27.1134
gene10386	67.7468	67.5262	63.7086	69.7568	88.8317
gene10387	12.4617	13.6323	12.4392	13.4673	14.2657
gene10388	16.6332	15.9155	16.6167	14.8105	14.546
gene10389	9.97073	7.54394	5.43628	6.64265	8.46302
gene1039	1.08884	2.89959	1.25328	1.61586	3.87179
gene10390	0.101054	0.105303	0.116316	0.13497	0
gene10391	0.117108	0.122032	0.134795	0.625649	0.129235
gene10392	0	0.344263	0.253511	0.147084	0
gene10393	0	0	0	0	0
gene10394	0.66585	0.0867311	0.0958015	0.111166	0.459251
gene10395	4.24158	2.15024	1.97926	2.14357	0.759051
gene10396	0	0.344662	0	0.441763	0
gene10397	159.529	133.686	138.45	107.881	330.385
gene10398	16.31	15.2806	16.0175	13.7899	17.9989
gene10399	76.8168	82.1114	58.9029	85.2658	85.3119
gene104	0.190692	0	0.146328	0.0475426	0
gene1040	0.0699718	0.802056	0.241619	0.373824	0.694959
gene10400	8.81712	7.37168	8.49664	6.70979	6.56221
gene10401	23.461	23.7491	24.5182	23.4267	30.3289
gene10402	0.132127	0.137683	0	0.176473	0.441848
gene10403	0	0	0	0	0.0724473
gene10404	0	0	0	0	0
gene10405	2.87881	4.16824	1.95328	3.15696	2.70875
gene10406	21.0767	18.1979	16.8244	19.4495	21.0844
gene10407	11.5023	14.2109	10.7177	12.1656	14.7082
gene10408	1.05952	0.276018	0.457326	0.353779	0.438463
gene10409	33.7076	38.7201	35.8375	37.5115	45.6401
gene1041	0.100361	4.05251	2.96015	2.72109	0.600837
gene10410	10.0449	10.1184	10.7912	10.2858	9.97658
gene10411	101.117	103.8	88.2128	99.6773	132.853
gene10412	6.26573	7.10531	10.0544	10.0916	10.3027
gene10413	1039.4	1041.13	433.473	1009.74	398.156
gene10414	895.749	955.1	353.425	717.12	327.9
gene10415	372.196	559.068	154.123	278.869	142.256
gene10416	17.7747	23.2949	16.5489	21.2286	21.1217
gene10417	25.5743	28.1302	29.2031	30.3623	26.4307
gene10418	233.078	194.142	183.81	168.767	172.807
gene10419	83.4108	86.5755	74.4206	84.8177	123.639
gene1042	29.4285	35.1561	34.9439	48.9846	39.6628
gene10420	0.199978	0.0595393	0.206693	0.545093	0.0900762
gene10421	116.309	153.046	125.776	114.526	201.628
gene10422	8.66133	15.2968	8.70571	9.66739	12.0263
gene10423	0	0	0	0	0
gene10424	20.2507	22.9297	17.3216	21.6822	22.9623
gene10425	70.5065	71.5007	79.0341	70.7248	87.4401
gene10426	46.3253	56.8653	41.2089	48.1075	70.9968
gene10427	20.4378	20.6764	15.5041	9.96403	13.0923
gene10428	0	0	0	0	0.872413
gene10429	1.93046	2.15037	1.22594	3.64528	2.13036
gene1043	13.1817	12.2669	12.9819	17.0409	14.7801
gene10430	0.119462	0.0946089	0.126504	0.181894	0.100193
gene10431	17.2182	22.4649	21.6204	22.1418	25.2827
gene10432	5.09704	2.21307	8.31136	4.11301	5.50768
gene10433	0.108305	0.085773	0.114689	0.164906	0.0908354
gene10434	25.5063	29.1244	29.193	34.8345	27.6718
gene10435	132.156	158.121	141.107	138.923	140.879
gene10436	39.8188	49.1099	37.259	39.4223	44.019
gene10437	13.6556	14.5596	16.1864	17.6348	16.1176
gene10438	29.6228	36.3158	32.9506	34.5778	45.8764
gene10439	16.6687	25.9497	16.8745	21.1901	17.065
gene1044	66.1455	38.639	62.23	82.9138	78.9351
gene10440	134.967	143.588	138.159	153.367	168.645
gene10441	22.0769	10.7837	32.0286	27.49	41.7471
gene10442	0	0.0850528	0.0473896	0	0.00876815
gene10443	21.5158	21.7652	13.3391	22.0177	17.4485
gene10444	184.77	126.763	123.444	104.361	79.5777
gene10445	9.19856	13.5689	4.40013	6.86092	7.97588
gene10446	1.87121	1.91445	1.29229	2.63556	1.23899
gene10447	13.2315	13.7879	10.8261	10.646	9.85176
gene10448	4.13881	3.78689	2.55623	2.29205	3.899
gene10449	3.99586	3.88289	2.08805	4.68213	3.21931
gene1045	75.0474	56.192	62.5228	73.7251	68.711
gene10450	5.0902	5.00698	3.46709	3.22373	3.39508
gene10451	12.3279	12.0434	12.7117	13.7212	11.4788
gene10452	125.239	127.941	129.676	131.116	108.485
gene10453	2.05445	0.204909	5.36118	0.129359	3.83156
gene10454	5.93881	1.95234	1.62756	0.944288	1.67746
gene10455	21.1196	26.5879	20.7307	22.4803	25.3178
gene10456	15.0271	16.5359	14.2063	14.6114	18.131
gene10457	0.232446	1.04228	0	0.348093	1.24372
gene10458	10.33	8.00988	14.4742	11.7842	3.56242
gene10459	2580.49	2824.66	2350.8	2736.69	3044.48
gene1046	63.4224	70.1053	68.0346	75.4767	76.6469
gene10460	3.66466	4.01629	2.83633	5.06339	2.71934
gene10461	17.0634	16.8389	14.3076	12.829	12.5952
gene10462	17.9036	23.573	14.3804	18.3839	17.1057
gene10463	0	0	0	0	0
gene10464	0.564901	0.392437	0.216739	0	0.2078
gene10465	0.220455	0	0.454477	0	0
gene10466	0	0	0	0	0
gene10467	0	0	0	0	0
gene10468	129.698	84.0734	75.2272	78.4812	64.3968
gene10469	1.85109	4.02414	1.10206	3.53803	1.40881
gene1047	13.9828	15.5249	18.6813	15.3409	12.1242
gene10470	86.8497	80.0592	59.5536	84.6712	86.4673
gene10471	205.536	205.964	216.678	196.006	166.528
gene10472	8.71419	13.5413	7.12678	9.80116	12.8221
gene10473	45.3528	59.1236	31.0422	37.6409	58.2879
gene10474	127.402	127.421	107.941	99.8161	92.0389
gene10475	20.3738	21.1872	20.4836	21.936	21.6118
gene10476	47.3583	39.5245	47.3578	43.2181	47.4146
gene10477	41.6118	43.1051	32.6489	35.3198	34.8347
gene10478	50.8249	86.3045	50.8915	51.9188	70.5623
gene10479	38.1396	44.2786	39.4829	40.0646	53.6572
gene1048	3233.12	3375.66	3247.79	3635.57	3335.16
gene10480	19.5724	13.8764	23.5571	22.441	24.4594
gene10481	3.96215	1.78913	6.84083	3.35157	7.14167
gene10482	0.311581	0.266133	0	0.682221	0.53174
gene10483	73.9319	82.9409	64.2933	90.8438	92.2821
gene10484	1.05306	0.438938	0	0.2813	0.464845
gene10485	2.60355	2.19627	1.42703	2.31825	2.59953
gene10486	1.86621	1.30824	2.61672	2.35659	1.7599
gene10487	1.57176	3.01154	1.80914	1.01578	0.895239
gene10488	0.303323	0.105359	0.116378	0.135042	0.669466
gene10489	187.769	175.726	189.575	205.05	189.847
gene1049	0.519977	0.371125	0.819874	0	0.707453
gene10490	0	0.24497	0.135294	0	0.129714
gene10491	41.825	32.7449	29.49	27.9313	38.4232
gene10492	11.9067	15.5766	12.3642	17.2857	18.2099
gene10493	49.5315	42.3031	50.4094	54.5157	55.8781
gene10494	16.3632	18.5526	10.4241	19.2434	19.0798
gene10495	45.6063	52.1549	51.7139	52.3117	62.2983
gene10496	21.0356	19.0123	19.7624	23.0883	18.2185
gene10497	2.18487	1.55233	2.28623	2.52024	1.53435
gene10498	0.664091	1.84987	0.809002	0.586716	1.57408
gene10499	1.65459	2.21679	1.33314	1.89421	1.40857
gene105	0.757794	0.203397	0.211453	3.32775	1.52049
gene1050	19.6866	24.6998	22.432	26.496	28.1233
gene10500	1.33084	1.84907	1.313	1.94679	1.60853
gene10501	0.396858	0.528421	0.761326	0.441711	0.535278
gene10502	41.6687	44.7841	18.9988	33.9164	37.1521
gene10503	2.31695	3.82277	0.88896	2.8367	4.0484
gene10504	57.2309	69.1159	53.1887	67.4384	67.5169
gene10505	8.85217	0.432394	7.48262	0	3.2054
gene10506	17.6529	20.416	14.0369	18.9582	20.0766
gene10507	2.66051	3.3984	1.48177	2.69374	1.94156
gene10508	18.2869	22.867	16.3578	20.7956	23.5247
gene10509	0	0	0	0	0
gene1051	0.125492	0.457692	0.938893	0.16761	0.484706
gene10510	0.327338	0.375213	0	0.437201	0.06141
gene10511	0	0	0.467416	0	0.746896
gene10512	0	0	0	0	0
gene10513	0.212469	0.590409	0.489116	0.66215	0.416837
gene10514	0	0	0.261439	0.14942	0
gene10515	3.29311	2.88626	0.852119	1.84117	3.16929
gene10516	1.80534	2.5624	1.54059	1.62136	1.95794
gene10517	0	0	0.0676055	0.0784477	0
gene10518	1.49491	1.53137	0.670777	1.01524	1.45399
gene10519	11.3941	13.4124	11.4958	13.1516	13.5054
gene1052	79.485	13.9937	23.3946	33.9331	17.2228
gene10520	115.261	139.106	120.536	145.042	152.221
gene10521	28.8554	37.5101	36.4005	32.8952	40.6889
gene10522	11.6885	9.4084	12.2382	8.0209	12.1118
gene10523	0	0	0	0	0
gene10524	89.7023	97.8088	82.3918	97.1512	92.4851
gene10525	14.3576	21.3487	9.53425	20.7253	13.7115
gene10526	0.245398	0.224936	0.734919	0.63731	0.305915
gene10527	0.218508	0.283918	0.844575	0.745827	0.452502
gene10528	16.014	17.6145	21.1108	20.2004	32.0216
gene10529	26.6678	26.6191	22.0522	23.3392	29.3519
gene1053	91.597	82.4156	26.4635	36.6035	26.3869
gene10530	165.488	138.693	134.74	112.229	125.643
gene10531	60.6079	61.8342	55.1562	57.5219	56.6703
gene10532	0	0	0	1.00401	0
gene10533	419.452	445.237	385.01	445.794	562.322
gene10534	28.2824	29.5555	24.8316	29.2432	30.6349
gene10535	128.836	146.61	122.049	142.757	167.268
gene10536	0.775806	0.46196	0.765407	0.740133	0.611532
gene10537	5.02807	5.2395	3.67581	3.99307	3.89912
gene10538	20.6499	22.7558	18.6822	22.9432	24.9205
gene10539	10.7651	8.68828	14.3346	9.30349	12.4622
gene1054	435.565	429.827	237.389	279.147	208.216
gene10540	91.7672	65.8512	82.0734	53.4362	69.4216
gene10541	67.1176	55.4696	57.6801	65.1834	67.6272
gene10542	0	0	0	0	0
gene10543	0.182459	0.253509	0.280021	0.0812323	0.201354
gene10544	4.31324	5.35424	4.04227	4.50166	4.16166
gene10545	12.8552	10.4492	12.1749	11.8195	13.9841
gene10546	0.318032	0.331406	0.488086	0.141591	0.131027
gene10547	27.7796	29.7364	27.8757	29.4922	41.8085
gene10548	46.965	55.8462	44.0619	51.2809	53.9721
gene10549	16.1495	17.5603	18.8195	18.3544	18.7074
gene1055	151.745	114.018	98.8586	108.306	66.7402
gene10550	48.3691	53.942	60.531	54.9813	69.6753
gene10551	17.3532	18.3965	18.9349	18.4883	17.6005
gene10552	23.6984	29.199	24.3611	25.8791	34.2943
gene10553	0.0602036	0.250941	0.207888	0.321638	0.531504
gene10554	16.8476	19.8984	20.2176	24.1279	26.5536
gene10555	0.0718039	0.208292	0.294854	0.0855352	0.10708
gene10556	12.9025	13.9829	16.0393	9.65045	15.093
gene10557	68.9013	75.4066	67.9208	73.3303	81.1672
gene10558	0.143103	0	2.63544	0	0
gene10559	0	0.235929	0.260603	0	0
gene1056	61.0706	43.2007	39.2662	44.5703	34.5693
gene10560	0	0	2.71372	0	0.289088
gene10561	0	0	0.185829	0	0
gene10562	0	0	3.80046	0	0
gene10563	0	0	0.942547	0	0
gene10564	0	0	0	0	0
gene10565	3240.96	3218.54	3104.86	2475.57	2122.87
gene10566	33.4055	41.7979	47.4989	41.7652	29.9131
gene10567	63.1247	62.4058	51.2334	59.9904	68.4707
gene10568	80.4015	84.0218	92.0712	103.963	129.31
gene10569	5.83144	5.93272	6.48945	7.85102	5.93934
gene1057	0.227684	0	0	0	0
gene10570	472.087	326.256	165.547	298.328	155.928
gene10571	909.967	585.234	313.808	535.374	267.048
gene10572	266.741	94.1674	139.989	143.995	110.687
gene10573	368.179	346.566	177.192	218.032	172.715
gene10574	323.124	285.537	140.417	171.71	124.27
gene10575	0	0	0	0.134827	0
gene10576	3.04396	1.89156	0.197391	1.25976	0.930161
gene10577	1.39482	0.581388	1.28438	1.86295	0.846591
gene10578	2.46182	1.101	1.21615	3.52797	1.45748
gene10579	0	0	0	0	0
gene1058	2.90311	2.96345	2.93239	3.87746	4.11909
gene10580	0	0	0	0	0
gene10581	6.48907	1.8382	2.64229	0.830934	1.62079
gene10582	4.87869	4.5487	5.22144	5.60156	9.06762
gene10583	36.6745	40.1275	34.3737	41.9857	46.0613
gene10584	2.71367	6.12687	4.42498	2.4163	5.73982
gene10585	7.22201	7.60788	5.44673	7.82506	7.36064
gene10586	7.3196	5.26027	2.03364	1.68556	2.08903
gene10587	36.5737	35.6864	20.8191	28.5987	23.0425
gene10588	0.102084	0.106377	0.235004	0	0.112656
gene10589	8.889	8.61655	5.23472	2.76102	4.33443
gene1059	43.962	52.7818	53.4891	52.6536	83.3183
gene10590	39.1572	42.2152	36.1419	43.5005	45.3863
gene10591	30.3123	21.8304	17.1084	24.6979	36.8093
gene10592	4.11045	4.80565	4.99088	4.41879	6.19565
gene10593	9.71968	12.7188	14.8656	8.65417	8.86469
gene10594	1.01521	1.23422	1.75281	0.903963	0.186724
gene10595	0	0	0	0	0
gene10596	4.01162	11.0053	4.42902	3.9365	4.69808
gene10597	5.23746	5.90961	4.03178	5.12394	3.71823
gene10598	3.71294	6.40258	3.9657	7.97627	6.46362
gene10599	1.32255	2.20507	1.63103	2.86415	2.08502
gene106	1.07884	1.4454	0.886979	0.617537	0.340158
gene1060	2.16117	1.60861	1.0661	4.1236	4.76995
gene10600	0.10788	0.457243	0.185561	0.41769	0.246128
gene10601	0	0	0	0	0
gene10602	0	0	0	0	0
gene10603	38.6607	40.2038	55.2136	68.7306	115.357
gene10604	46.3636	56.5264	46.8552	33.6868	30.0848
gene10605	2.14144	3.25677	4.33016	8.58049	11.5605
gene10606	3.45369	2.06938	2.91522	4.15155	6.38399
gene10607	0	0	0.306163	0	0
gene10608	11.7572	9.07525	4.76156	5.52519	6.84775
gene10609	18.8706	16.2002	8.06866	7.70879	9.43649
gene1061	18.1065	21.1105	14.652	23.4516	17.1734
gene10610	8.48347	9.4308	6.93216	8.80174	10.0108
gene10611	8.53864	8.68317	5.07773	4.69401	5.36594
gene10612	13.4078	16.7083	8.60681	8.77316	7.62447
gene10613	13.2603	11.1749	12.4972	12.0648	14.7808
gene10614	19.1405	19.9138	20.2178	18.1013	22.2541
gene10615	0.168304	0	0.0639284	0.186576	0
gene10616	2.6959	6.51238	3.5262	2.6187	1.48753
gene10617	0	0	0.12809	0	0
gene10618	1.90302	2.47881	2.05353	3.0183	2.10009
gene10619	11.4568	7.99367	10.435	6.38693	11.6538
gene1062	11.6267	9.24765	4.33158	5.77644	11.3431
gene10620	13.8962	7.41981	5.15541	8.89661	6.33689
gene10621	3.67307	2.1264	2.46622	3.54311	2.58969
gene10622	0.674708	0.966735	0.194152	0	0
gene10623	0.0313059	0.0679632	0	0	0
gene10624	0.166317	0	0.0315869	0.203255	0
gene10625	4.46178	2.90587	2.18265	4.46945	2.33881
gene10626	0.253578	0.475634	0.467001	0.745106	0.111935
gene10627	1.67887	2.68558	1.40694	2.02597	1.39767
gene10628	4.17476	3.38357	4.27135	4.33682	6.14276
gene10629	5.37705	6.83443	3.19313	4.66583	8.03151
gene1063	3.84853	3.66723	2.4873	3.60088	4.20164
gene10630	0.388923	1.62111	1.88018	2.70117	12.1034
gene10631	2.28605	1.83888	1.47723	3.80324	1.94741
gene10632	15.8693	16.5798	13.8307	17.4323	15.0892
gene10633	0.0995724	0.0518798	0.114611	0.132991	0.109884
gene10634	24.0144	27.613	22.8756	31.7056	30.7658
gene10635	1.36128	0.68638	1.2636	0.879751	1.793
gene10636	47.9467	51.2295	40.245	49.5316	60.7886
gene10637	186.933	167.513	198.401	162.697	160.862
gene10638	16.5899	21.5468	10.5164	14.772	13.2666
gene10639	17.7603	21.9001	21.4648	19.5699	18.2928
gene1064	27.403	30.3084	26.6245	30.3326	33.0254
gene10640	18.9998	17.053	20.3795	20.3137	20.7123
gene10641	9.82201	9.5527	10.6355	10.3976	13.8099
gene10642	11.9801	13.335	13.1626	11.9097	13.6901
gene10643	23.6695	24.4923	25.5296	26.7499	34.8883
gene10644	2.19684	2.83427	1.68575	2.65471	3.00155
gene10645	8.50916	9.39748	4.01817	6.70246	11.5573
gene10646	17.1029	17.257	19.7871	23.1366	19.5694
gene10647	9.55069	7.21181	4.46098	6.84025	4.12423
gene10648	1.88167	0.840342	0.309408	0.179515	1.63156
gene10649	1.91418	2.3164	1.49254	1.23708	1.2947
gene1065	0	0	0	0	0
gene10650	34.6117	37.7008	37.0628	35.4363	39.7929
gene10651	0.0721977	0.64701	0.914119	0.135001	3.87216
gene10652	35.0755	36.5505	43.8219	25.8957	63.0216
gene10653	36.4135	42.6019	30.6076	48.2414	58.8698
gene10654	47.8111	47.9009	47.3815	49.5345	47.2148
gene10655	0.056907	0.0593	0	0.228019	0.1884
gene10656	0.540806	1.69064	1.45246	1.44463	0.198936
gene10657	17.4282	20.0169	19.4014	21.0687	35.4476
gene10658	4.72174	4.96307	4.0407	3.78388	4.599
gene10659	0	0	0	0	0
gene1066	46.9119	40.6742	49.723	48.1416	60.1649
gene10660	0	0	0	0	0
gene10661	0	0	0	0	0
gene10662	0	0	0	0	0
gene10663	0	0	0	0	0
gene10664	1.29241	1.03597	0.915448	1.85896	1.42625
gene10665	25.7929	30.4312	24.3642	32.4141	32.7941
gene10666	0	0.107125	0.0369774	0.244574	0.0779951
gene10667	38.9847	49.3697	49.494	51.55	65.5189
gene10668	0.27628	0.0937341	0.125723	0.283191	0.581418
gene10669	0.818873	0.568872	0.471273	0.364569	0.301224
gene1067	9.53565	8.83256	7.01232	8.13692	12.277
gene10670	0	0	0	0	0
gene10671	0	0	0	0	0
gene10672	0	0	0	0	0
gene10673	0.948883	1.03587	0.572101	0.905251	1.14687
gene10674	65.5512	72.2315	61.5331	55.6761	79.0699
gene10675	0.112004	0.525214	0.644601	0.149596	2.90467
gene10676	45.3098	30.7257	35.8622	29.5365	46.3141
gene10677	35.8394	45.7027	41.9686	43.4794	62.5048
gene10678	16.1731	11.4695	11.4624	10.2005	15.5343
gene10679	0.0640348	0	0.1253	0	0
gene1068	0.419627	0.409109	0.409324	0.273582	0.525871
gene10680	1.1831	1.04484	5.45053	3.59885	2.19996
gene10681	0	0.0706778	1.32718	0.271769	0.449096
gene10682	19.0682	24.7596	24.1314	20.5344	40.1577
gene10683	5.28987	8.8372	5.75052	2.74761	11.073
gene10684	30.5204	27.057	23.5947	26.314	39.462
gene10685	57.809	53.6921	57.9813	66.4408	68.8805
gene10686	4.17985	3.44638	5.61098	8.02515	13.1635
gene10687	0	0	0	0	0
gene10688	2.35439	2.36919	1.30228	1.41758	2.31876
gene10689	9.43599	9.47158	8.69952	9.48255	11.2632
gene1069	0.545923	0.732794	0.90856	0.601761	0.609525
gene10690	29.8255	35.3003	32.8466	35.6553	55.8726
gene10691	36.4323	44.5819	32.7013	39.285	46.1067
gene10692	0.450963	0.299044	0.377506	0.27378	0.497662
gene10693	0	0	0	0	0
gene10694	0	0	0	0	0
gene10695	0	0.146043	0.322633	0.187188	0.154663
gene10696	0	0	0	0	0
gene10697	0	0	0	0	0
gene10698	0	0	0	0	0
gene10699	0	0	0	0	0
gene107	28.1389	5.65952	12.9339	5.25286	16.7406
gene1070	24.4582	22.8501	27.9094	21.9657	27.689
gene10700	0	0	0	0	0
gene10701	0	0	0.364844	0	0
gene10702	0	0	0	0	0
gene10703	0	0	0	0	0
gene10704	0	0	0	0	0
gene10705	172.65	167.759	225.473	163.142	162.107
gene10706	8.57474	8.36254	6.83292	7.04777	8.85611
gene10707	12.6887	13.5298	5.26462	11.2326	8.1411
gene10708	109.664	62.8001	95.8071	58.3901	78.4997
gene10709	236.531	192.672	301.969	185.379	212.998
gene1071	7.33624	8.90672	5.28099	7.80767	6.14263
gene10710	26.7066	22.1372	9.78093	17.0243	20.3179
gene10711	10.0301	10.1631	4.59244	7.84541	7.46069
gene10712	9.56229	12.1787	5.80897	9.22395	6.15563
gene10713	293.113	254.497	171.896	199.464	217.162
gene10714	28.2678	24.7726	16.556	24.9478	19.4005
gene10715	0	0	0	0	0
gene10716	0	0	0	0	0
gene10717	0	0	0	0	0
gene10718	0	0	0	0	0
gene10719	0	0	0	0	0
gene1072	10.6751	10.8	13.0032	9.41304	9.4931
gene10720	0	0	0	0.429803	0
gene10721	0	0	0	0	0
gene10722	0	0	0.147728	0	0
gene10723	0	0	0	0	0.121295
gene10724	0	0	0	0	0.394507
gene10725	0	0	0.122439	0	0
gene10726	0	0	0	0	0
gene10727	0	0	0.106547	0	0
gene10728	0	0	0	0	0.115819
gene10729	0	0	0.397289	0	0
gene1073	2.38169	2.45364	1.90028	2.60267	2.68806
gene10730	0	0	0.517102	0	0.10907
gene10731	0.672026	0.350143	0.19338	0	0
gene10732	0	0.310628	0	0	0.657924
gene10733	0	0	0	0	0.171208
gene10734	0.0900437	0	0	0	0.174647
gene10735	0.283433	0	0	0.18928	0.0781958
gene10736	0	0.654052	0.310066	0.359793	0.395379
gene10737	0	0.0949196	0	0	0
gene10738	0.0964063	0.152212	0.336262	0	0.10639
gene10739	0	0	0	0.203211	0.194766
gene1074	0	0	0.436069	0	0.209041
gene10740	0.0833473	0.218446	0.290712	0	0.0919782
gene10741	0	0	0	0	0
gene10742	0	0	0.995029	0.384869	0
gene10743	2.29137	0.530604	0	0.340045	0.561921
gene10744	347.421	117.556	82.1618	152.008	155.893
gene10745	45.3536	52.5665	43.4123	56.7973	60.5596
gene10746	18.1614	20.0364	15.8847	21.9875	17.2815
gene10747	15.4373	16.4942	14.79	17.2424	16.8035
gene10748	22.1907	18.727	25.5421	17.5326	23.7988
gene10749	73.1411	86.8647	71.9606	74.4661	99.4054
gene1075	514.565	530.772	435.867	493.238	577.956
gene10750	0	0	0	0	0
gene10751	0.857233	0.255223	0	0	0.540573
gene10752	201.387	206.907	204.724	206.929	194.579
gene10753	34.4405	39.4093	36.2104	38.0957	41.1221
gene10754	0.724048	2.26348	2.2224	2.25647	1.59805
gene10755	44.7905	46.628	50.1597	48.7148	54.6022
gene10756	28.209	25.7603	29.1526	27.7511	31.2975
gene10757	28.7994	32.214	31.874	32.0095	43.2275
gene10758	37.8988	34.1585	37.2776	38.2598	38.999
gene10759	17.173	21.7854	19.2756	17.0957	27.4265
gene1076	4.14757	3.09868	4.97339	2.81988	3.42424
gene10760	26.6713	30.6315	32.012	31.1382	31.6704
gene10761	31.4511	37.5435	31.5273	33.1322	53.0397
gene10762	38.0598	33.2712	38.748	34.3011	39.7031
gene10763	8.3704	8.31669	8.01014	9.68475	9.61313
gene10764	57.7669	53.3074	65.6719	56.6437	56.566
gene10765	52.3556	54.8037	58.9015	53.7093	58.2993
gene10766	13.1387	17.7986	13.9888	19.8882	19.8157
gene10767	10.6861	11.4364	9.80674	12.7296	10.9959
gene10768	0.104607	0.109006	0.0478722	0.0420831	0.034771
gene10769	0.108118	0.112664	0	0.0434955	0.035938
gene1077	10.8254	10.7679	10.4781	8.7081	8.28107
gene10770	10.9498	11.9111	14.4365	15.5916	16.79
gene10771	2.1948	2.82675	3.37784	3.12906	2.66701
gene10772	26.0315	17.2331	29.7868	20.6565	34.1347
gene10773	282.924	274.918	264.202	291.328	264.875
gene10774	7.00061	7.43009	7.01336	7.79183	3.14745
gene10775	49.6534	59.0325	96.839	54.8336	71.9129
gene10776	36.728	33.4334	20.5301	29.743	42.1619
gene10777	0	0.0985973	0.217817	0	0.277749
gene10778	1.11436	0.903167	0.49881	0.909554	0.614876
gene10779	1.09032	0.32462	0.537854	0.832149	0.68756
gene1078	14.9326	9.94145	9.78753	10.5262	12.3592
gene10780	26.5466	29.8982	34.1053	32.8597	39.5046
gene10781	0.135073	0.21113	0	0.0180407	0.165458
gene10782	56.6022	43.5775	42.463	50.5181	45.1208
gene10783	77.2873	62.968	10.4019	20.7174	32.7469
gene10784	0.355151	0.370085	0	0.237174	0
gene10785	0.858615	0.715777	0.592975	0.458715	0.284259
gene10786	4.57171	1.90558	1.89438	0.244244	1.81625
gene10787	27.686	24.7287	12.2045	24.5022	24.7024
gene10788	0.855525	0.891501	0.984735	1.25693	0.660883
gene10789	1.71499	2.72769	2.90906	2.29058	4.18361
gene1079	116.437	118.894	85.5178	98.129	118.693
gene10790	0	0	0	0	0
gene10791	0.622192	0.216119	0	0	0
gene10792	147.468	69.1513	169.155	83.8788	48.2606
gene10793	0	0	0	0	0
gene10794	25.3374	11.77	52.0035	6.52362	7.74829
gene10795	0	0	0	0	0.119826
gene10796	2.47957	2.58384	2.85406	0	1.09454
gene10797	3.62024	1.25749	2.2224	0.967057	2.92976
gene10798	7.75672	2.6943	21.8245	0.959266	1.58518
gene10799	6.47433	1.12443	11.7992	1.26106	1.48849
gene108	0.475458	1.61022	0.273633	0.317517	0.393521
gene1080	565.738	523.149	653.555	525.471	481.707
gene10800	0	0	0	0	0
gene10801	1.91577	0.544452	0.601391	0.465226	0.576587
gene10802	0	0	0	0	0
gene10803	0	0	0	0	0.13351
gene10804	0	0	0	0	0.135405
gene10805	0.52105	0	0	0	0
gene10806	0	0	0	0	0
gene10807	0	0	0	0	0
gene10808	0	0	0	0	0
gene10809	0	0	0	0	0.144544
gene1081	3.13379	4.95692	3.15686	2.55042	4.41848
gene10810	0.326215	0	0	0	0
gene10811	0.274831	0	0	0	0.151646
gene10812	0	0	0	0	0
gene10813	0	0	0	0	0
gene10814	0	0.271853	0	0	0
gene10815	0.156144	0.081355	0.359452	0.417099	0
gene10816	1.36312	0	0	0	0.450381
gene10817	0.431645	0.0845481	0	0.216735	0
gene10818	0	0	0.192361	0	0
gene10819	0.671433	0	0.19321	0	0.370481
gene1082	3.76494	6.38931	8.74883	7.70948	5.93545
gene10820	0	0	0	0	0.380903
gene10821	0.833809	0.081355	0	0.625649	0.172313
gene10822	1.06645	0	0.204585	0.474792	0.392295
gene10823	0.734299	0	0	0	0
gene10824	0	0	0	0	0
gene10825	0	0.338192	0	0	0
gene10826	1.85243	0	0	0	0
gene10827	7.96413	8.29902	2.20007	2.97838	6.67952
gene10828	3.69687	4.8154	3.0732	3.42891	1.58655
gene10829	0	0	0	0	0
gene1083	33.3549	41.4562	41.8826	36.9356	47.7846
gene10830	0	0	0	0	0
gene10831	0	0	0	0	0
gene10832	0.339008	0	0	0	0
gene10833	23.3408	29.2929	26.8659	40.373	29.484
gene10834	4.62547	5.97344	3.95803	6.87408	6.24286
gene10835	1.04507	0.978839	0.494337	0.914402	0.626788
gene10836	0.262893	0.1234	0.257163	0.245683	0.0871223
gene10837	0.107631	0	0	0.143754	0.0296941
gene10838	2.24405	2.92302	2.2601	0.374651	1.54777
gene10839	24.0629	23.2788	22.6613	24.6134	36.5036
gene1084	19.7736	27.5914	27.1557	32.7577	30.1564
gene10840	1.31346	1.3998	1.30567	1.95364	1.28476
gene10841	18.6363	25.1488	35.9303	26.0112	32.4945
gene10842	31.538	35.9734	37.1024	39.4917	42.5342
gene10843	27.535	25.3564	28.1311	23.6623	28.8552
gene10844	20.678	20.4135	21.4522	18.5332	18.4656
gene10845	146.861	169.04	126.1	164.442	229.439
gene10846	34.1489	32.6651	30.8404	32.9797	32.8538
gene10847	31.477	44.2819	39.7861	45.9183	53.2728
gene10848	53.1148	56.8763	49.2325	60.6973	78.2992
gene10849	0	0	0.799902	0	0.255637
gene1085	27.2121	30.1352	32.0154	28.2982	29.5868
gene10850	0	0	0.163808	0	0.157051
gene10851	4.80104	5.12397	2.67394	3.2062	2.86274
gene10852	15.4381	16.043	11.0969	16.0247	17.4351
gene10853	4.45974	4.54401	6.55921	5.42707	6.01525
gene10854	38.4074	48.5058	46.1796	48.0144	50.7905
gene10855	80.0909	76.6625	81.0765	70.7335	56.1401
gene10856	43.807	49.2349	41.283	47.0199	76.9697
gene10857	23.8781	24.6799	28.1547	26.015	29.4928
gene10858	60.9562	66.8075	78.6368	90.4819	90.7993
gene10859	30.1929	35.9412	44.1523	30.8547	38.774
gene1086	32.5161	39.1483	44.1761	44.0794	49.6177
gene10860	19.0789	23.4577	28.3509	23.1902	21.9458
gene10861	34.7445	33.2744	31.7178	32.5605	35.2958
gene10862	34.5461	32.9989	33.9647	30.5201	43.8817
gene10863	45.1759	51.5517	39.7237	37.7855	54.9213
gene10864	5.02687	4.83084	5.14318	4.84901	6.34872
gene10865	5.52414	3.14975	7.11826	3.01624	4.17915
gene10866	4.10547	3.81561	3.0652	9.04015	12.1225
gene10867	10.9842	14.6074	11.5594	11.3174	12.6989
gene10868	0.108059	0.225205	0	0	0.119249
gene10869	78.9923	86.7596	69.161	72.5153	97.6786
gene1087	27.0507	31.7837	25.4173	28.8945	36.0204
gene10870	0.90171	0.266634	1.34516	0.875739	0.248432
gene10871	46.0929	55.1503	44.7821	50.8383	49.838
gene10872	3.1206	5.05839	5.78695	2.54708	6.50487
gene10873	7.3066	6.62073	8.89765	7.77881	6.89464
gene10874	0	0	1.45522	0.723685	0.597942
gene10875	0.655805	0.896938	1.04735	0.624085	0.949877
gene10876	8.1818	9.07005	9.71805	9.18401	8.83695
gene10877	5.5573	6.43444	7.10735	4.94832	7.15492
gene10878	17.3394	16.4912	15.9982	11.7633	16.0977
gene10879	7.93611	11.5187	11.5815	10.2211	12.9805
gene1088	13.0801	13.8778	15.0761	15.0341	15.1509
gene10880	10.4262	11.737	13.1396	10.7745	9.99417
gene10881	0.133368	0.277953	0	0.71252	2.64923
gene10882	7.36193	10.4844	10.7335	9.01338	13.8113
gene10883	10.3085	11.6523	10.3571	9.80116	9.06224
gene10884	26.773	29.6142	27.6251	28.6995	44.1747
gene10885	13.3623	15.4501	16.3284	16.9913	17.978
gene10886	20.4898	28.295	25.8853	28.9242	35.1737
gene10887	0	0	0	0.141433	0.31318
gene10888	12.8359	11.1668	7.59057	9.90889	16.6343
gene10889	0.0918126	0.0373582	0.0573686	0.151824	0.191061
gene1089	0	0	0	0	0
gene10890	23.4555	21.4475	18.7678	19.3679	28.1705
gene10891	12.8173	13.9621	8.7945	10.4637	25.3258
gene10892	11.1002	9.79381	4.73732	8.98401	20.8454
gene10893	3.38462	1.0077	3.89579	3.87478	5.6916
gene10894	0.540992	0.153748	0.141522	0.0656875	0.54274
gene10895	1.01936	0.151746	0.13968	0.194497	0.267838
gene10896	31.8156	13.3206	11.2805	7.20875	14.1068
gene10897	6.43307	6.89242	4.06734	6.53489	9.69897
gene10898	1.38645	1.09602	0.715381	0.319273	1.16071
gene10899	8.17993	7.70429	7.96682	3.78184	9.027
gene109	7.04383	7.34002	4.51712	6.45114	6.2186
gene1090	33.2274	31.8911	26.2185	31.4743	34.4006
gene10900	3.10785	1.16947	3.47786	0.807124	1.81011
gene10901	0.214654	0	0.432377	0.143348	0.296103
gene10902	0.198833	0	0.171646	0.132783	0.0548556
gene10903	58.3506	113.323	20.97	103.767	26.0928
gene10904	96.7664	59.971	44.4873	86.0462	125.797
gene10905	21.7336	22.8793	13.0199	21.7153	25.2724
gene10906	0	0	0	0	0
gene10907	0	0	0	0	0
gene10908	0	0	0	0	0
gene10909	0	0	0	0	0
gene1091	13.9089	19.8181	19.6036	16.3024	18.4818
gene10910	0	0	0	0	0
gene10911	0	0	0	0	0
gene10912	0	0	0	0	0
gene10913	0	0	0	0	0
gene10914	0	0	0	0	0
gene10915	0	0	0	0	0
gene10916	0	0	0	0	0
gene10917	0	0	0	0	0
gene10918	0	0	0	0	0
gene10919	0	0	0	0	0
gene1092	47.7188	49.3	48.1453	48.5562	56.3022
gene10920	0	0	0	0	0
gene10921	0	0	0	0	0
gene10922	0	0	0	0	0
gene10923	0	0	0	0	0
gene10924	0	0	0	0	0
gene10925	0	0	0	0	0
gene10926	0	0	0	0	0
gene10927	1.10455	1.56954	0.693474	1.07292	0.775683
gene10928	0	0.0212061	0.053236	0	0.0673732
gene10929	7.83382	2.82884	1.1606	7.4588	7.91749
gene1093	14.3813	18.568	14.2923	19.8638	24.1541
gene10930	11.7214	8.17151	6.17575	7.55205	5.22235
gene10931	28.625	35.6697	28.0009	33.1425	40.6112
gene10932	0	0	0	0	0
gene10933	0	0	0	0	0
gene10934	0.416204	0.0870388	0.0616291	0.33468	0.0488454
gene10935	0	0	0	0	0
gene10936	0	0	0	0	0
gene10937	0	0	0	0	0
gene10938	0	0	0	0	0
gene10939	0	0	0	0	0
gene1094	24.0671	27.8481	23.1578	23.5254	31.7539
gene10940	0	0	0	0	0
gene10941	0.82386	0.565832	1.36085	0.507313	0.66417
gene10942	0	0	0	0	0
gene10943	38.464	29.584	23.1907	25.279	19.5392
gene10944	0.39206	0.149322	0	0.344503	0.294765
gene10945	0.0230992	0.178523	0.170605	0.326515	0.167817
gene10946	2.40738	2.77268	1.60424	1.52307	5.73283
gene10947	0.510971	0.319474	0.117628	0.272986	0.563884
gene10948	4.98919	1.85678	4.64886	3.01453	10.7495
gene10949	0	0	0	0	0.0349214
gene1095	15.1458	18.4729	19.6124	17.7005	18.6136
gene10950	0	0	0.368116	0.142384	0
gene10951	0.642946	0.133996	0.29602	0.51524	0.56762
gene10952	50.6281	43.1897	248.346	129.109	97.7017
gene10953	0	0	0	0	0
gene10954	0	0	0	0	0
gene10955	0	0	0	0	0
gene10956	0.215744	0.390985	0.720691	0.131548	0
gene10957	0	0	0	0	0
gene10958	0	0	0	0	0
gene10959	0	0	0	0	0
gene1096	50.3859	44.8835	36.6576	43.8901	36.7249
gene10960	0	0	0	0	0
gene10961	0.0235587	0	0	0	0
gene10962	1.45374	1.18813	0	1.82744	1.85593
gene10963	1.68304	2.2549	0	2.7296	4.37798
gene10964	2.05312	1.23863	0	1.01028	4.29295
gene10965	1.06467	0.525523	0.386988	0.673577	1.23676
gene10966	4.99945	2.23272	0.939513	3.95193	4.27862
gene10967	0	0	0	0	0
gene10968	0.406375	0.105866	0.116937	0.135691	0.448457
gene10969	0.235375	0	0.090308	0.209582	0.173166
gene1097	0.0820935	0.406342	0.0866177	0	0.128342
gene10970	0.56873	0.237058	0	0.455766	0.753149
gene10971	14.1793	25.3296	24.7403	16.834	18.6282
gene10972	66.5774	97.5701	70.5264	49.5982	33.3697
gene10973	1.90979	1.82426	3.11415	0.425127	3.16134
gene10974	6.97259	8.26797	4.1512	5.70005	6.69963
gene10975	0	0	0	0	0
gene10976	0.913205	1.10257	1.03052	1.4132	0.958072
gene10977	21.2298	16.8017	9.89265	12.8037	14.8349
gene10978	1.29628	2.21916	0.426303	2.59702	1.22616
gene10979	0	0	0.364844	0	0
gene1098	5.00953	4.10158	3.39789	2.86751	4.44238
gene10980	11.3542	4.51472	91.9992	11.3737	36.2711
gene10981	23.7474	19.7012	43.6992	24.0265	26.1503
gene10982	3.14855	3.10826	2.24629	3.91017	1.95065
gene10983	2.5528	4.18022	10.3891	4.62728	4.42695
gene10984	0	1.44414	0.429469	0.569537	0.705867
gene10985	12.0271	7.694	8.36585	12.4041	11.0445
gene10986	3.79626	4.82426	2.8136	5.24351	4.31199
gene10987	0	0	0	0	0
gene10988	0	0	0	0	0
gene10989	0.157306	0.245882	0.45266	0.420204	0.260394
gene1099	0.0788079	0.011873	0.169398	0.015218	0.0440083
gene10990	0	0	0	0	0
gene10991	0	0	0	0	0
gene10992	0	0	0	0	0
gene10993	0	0	0	0	0
gene10994	0	0	0.364844	0	0
gene10995	0	0	0	0	0
gene10996	4.70788	3.89353	2.25788	2.61998	3.88212
gene10997	0	0	0.364844	0	0
gene10998	0	0	0	0	0
gene10999	0	0	0	0	0
gene11	1.72445	2.53808	1.43385	2.37815	2.18108
gene110	60.5643	65.9423	59.0266	58.0602	57.5914
gene1100	2.27613	2.40347	2.4103	2.34422	2.55091
gene11000	0	0	0	0	0
gene11001	0	0	0	0	0
gene11002	11.7903	15.0238	8.03936	8.55841	8.34419
gene11003	0.463109	0.643444	0.355368	1.0309	0.681421
gene11004	0	0	0	0	0
gene11005	192.35	196.709	193.939	190.9	264.846
gene11006	20.713	18.6408	18.9647	20.4343	24.936
gene11007	0.868361	0.324991	1.14028	0.547232	0.283436
gene11008	2.98008	3.1054	1.55916	0.723685	2.98971
gene11009	40.4961	46.7282	40.8162	44.8842	63.2324
gene1101	0.435938	0.428871	0.94424	0.683632	0.418833
gene11010	22.045	21.3715	23.0866	13.0325	18.3456
gene11011	228.352	256.273	223.073	264.247	339.249
gene11012	11.8712	11.0951	13.3823	11.2786	13.5056
gene11013	0	0	0	0	0
gene11014	90.7323	93.2919	89.2597	104.237	105.369
gene11015	0	0	0	0	0
gene11016	0.616936	1.32926	0.176193	0.154886	0.255948
gene11017	0	0	0	0	0
gene11018	29.5087	24.8102	23.8339	27.7526	46.8164
gene11019	0	0	0	0	0
gene1102	0.333187	0.711756	0.479385	0.378261	0.36769
gene11020	0	0	0	0	0
gene11021	0	0	0	0	0
gene11022	0	0	0	0	0
gene11023	35.1974	40.0702	32.8157	47.2456	42.4352
gene11024	53.1479	49.3955	48.6091	46.8122	58.6516
gene11025	21.6779	27.7836	20.7157	28.3834	31.7844
gene11026	0	0	0	0	0
gene11027	51.4688	50.2901	51.3752	61.5706	58.1069
gene11028	44.2384	44.9477	46.3488	45.8253	47.0569
gene11029	25.7816	29.6194	25.5787	29.911	25.0941
gene1103	1.71165	1.15605	1.20399	1.35474	1.01441
gene11030	17.2761	18.1878	17.3949	12.9352	16.2077
gene11031	1.80089	1.2665	1.52212	1.87948	1.7668
gene11032	54.526	43.1148	60.1993	50.1271	49.9018
gene11033	27.8451	27.6664	37.44	35.3277	48.8688
gene11034	0.836124	0.94389	1.2431	0.372249	0.730477
gene11035	0	0.45528	0	0.480566	0
gene11036	1.52147	2.37817	1.31344	3.04816	1.25927
gene11037	0	0.169096	0.373561	0	0
gene11038	15.4203	23.4484	6.70524	15.5612	10.4624
gene11039	19.93	22.5886	20.2421	22.3938	23.9139
gene1104	36.4327	37.0096	28.4842	37.3369	37.1711
gene11040	3.32733	3.37601	3.22514	2.80678	3.47863
gene11041	22.0613	21.1062	14.7762	18.416	18.1544
gene11042	8.07687	8.49169	10.2673	10.3562	10.8944
gene11043	35.2307	34.2755	33.0154	31.4394	31.3096
gene11044	69.0181	69.6562	31.4825	42.677	66.9972
gene11045	57.5675	48.8331	30.2799	39.3949	49.9559
gene11046	0.515053	0.536711	0.14821	0.515938	0.142097
gene11047	0.201039	0	0	0	0
gene11048	5.21321	4.53849	2.88635	5.112	3.34989
gene11049	0.237475	0.247461	0.117146	0.045311	0.149752
gene1105	27.6832	26.828	27.0845	22.1846	30.2444
gene11050	10.8536	5.80787	12.2678	2.74256	10.6827
gene11051	0.123496	0.257377	0.142147	0	0
gene11052	1.55425	0.736184	0.32527	0.754869	0
gene11053	0	0	0	0	0
gene11054	3.6874	2.62222	3.03506	2.50686	3.00153
gene11055	0	0.116303	0	0.149069	0.246335
gene11056	1.62575	1.69412	1.36094	1.5792	1.92459
gene11057	22.3165	23.9087	24.1395	25.6168	25.4187
gene11058	77.3402	84.6079	88.5157	77.0521	102.947
gene11059	24.5018	25.9662	23.8042	30.4033	30.0368
gene1106	2.35068	1.34919	3.28525	1.15286	1.34944
gene11060	2.4913	2.28805	2.62454	3.77862	2.84248
gene11061	1.24665	0.577365	1.11606	0.370012	0.764303
gene11062	11.1289	13.4914	9.57557	13.6131	14.5917
gene11063	2.01433	0.732646	1.66709	0.234763	1.02029
gene11064	3.01124	0.825753	2.16474	0.529195	0.766636
gene11065	53.8727	66.8032	46.1753	68.7889	99.1825
gene11066	0.11113	0.0868521	0.145356	0.0472269	0
gene11067	13.1725	15.7454	12.0988	22.0254	22.1797
gene11068	0.346258	0.360818	0	0	0.57032
gene11069	0.455763	0.0678469	0	0.0869611	0.215554
gene1107	5.5577	12.2829	7.02975	5.62843	8.69435
gene11070	14.9495	13.7494	10.7733	12.1538	17.6094
gene11071	0.307916	0.346602	0.464347	0.49923	0.826791
gene11072	0.727171	0.760664	0.750077	2.12923	1.1142
gene11073	9.99795	10.812	11.1156	12.9577	15.5202
gene11074	174.939	192.101	169.406	193.684	201.154
gene11075	16.277	17.497	17.7492	14.8747	20.0424
gene11076	0	0.177235	0.296621	0	0.284387
gene11077	1.49202	2.84697	4.16324	1.82452	3.015
gene11078	0.145067	0.302335	0.166977	0.581267	0.320179
gene11079	49.5951	55.7163	46.8282	52.9823	58.9633
gene1108	0.0327432	0.0625534	0.031407	0.0437326	0
gene11080	22.3422	22.1844	19.2874	23.4813	28.8493
gene11081	131.253	131.19	60.893	119.553	87.449
gene11082	6.14013	6.26433	3.18221	4.85185	4.36358
gene11083	0.118865	0	0	0.185218	0.218623
gene11084	3.76033	5.18033	3.88808	4.12857	3.97389
gene11085	2363.98	2195.97	2263.32	2274.74	2148.28
gene11086	11.5263	13.5816	15.4102	15.1579	11.9371
gene11087	3.7932	4.90681	1.43027	5.80877	6.63987
gene11088	28.573	23.5162	29.7461	18.7168	24.3016
gene11089	34.6943	35.0938	27.2079	34.8388	31.2047
gene1109	0.986405	0.743415	1.22127	0.527473	0.435822
gene11090	13.6639	15.6276	14.8324	14.8372	18.1436
gene11091	32.1273	29.1759	23.0193	28.779	37.7324
gene11092	0	0	0.557339	0	0
gene11093	108.56	110.593	98.3797	122.137	130.866
gene11094	64.6097	71.9698	57.8933	65.1941	95.4396
gene11095	12.8648	13.4058	14.7042	12.2561	18.1682
gene11096	12.7298	15.6528	12.6333	15.6421	19.1053
gene11097	56.8292	69.2848	56.8926	67.776	77.3889
gene11098	14.6632	11.8589	10.5801	15.0537	16.1816
gene11099	24.4347	26.3109	24.2578	32.0916	22.4708
gene111	17.8338	12.6863	6.74141	13.0083	10.9659
gene1110	1.11582	0.799789	0.315765	0	0.251717
gene11100	107.952	115.77	102.083	107.202	136.799
gene11101	0.168902	0	0.0972054	0	0.0931961
gene11102	26.0116	27.3946	27.0831	24.1689	31.8998
gene11103	1.50939	2.5559	0.217169	2.01598	1.7698
gene11104	64.6783	73.6835	57.8425	67.2646	107.585
gene11105	10.1828	8.73366	10.0978	10.5665	13.139
gene11106	16.0603	16.4242	19.0877	16.0629	16.4044
gene11107	22.5217	23.8164	22.8508	21.3906	21.5401
gene11108	66.2231	64.153	33.9627	54.8918	45.7826
gene11109	167.502	178.85	108.736	148.556	154.312
gene1111	2.0423	2.9587	2.17874	1.92939	1.81403
gene11110	2.19427	2.20339	1.56132	2.34458	3.89641
gene11111	0.806431	0.980399	2.62997	1.43612	0.889941
gene11112	18.2761	27.0284	16.0299	15.3495	18.5834
gene11113	0	0	0	0	0
gene11114	3.35398	2.7615	0.786405	2.46105	1.64502
gene11115	4.97391	4.15028	2.4506	2.52494	4.03066
gene11116	0.999462	2.23176	1.80779	4.38612	2.04836
gene11117	5.16237	7.39109	4.24431	6.02587	6.03207
gene11118	0	0.183501	0	0.117599	0.194331
gene11119	0.689179	0.129504	0.216739	0	0
gene1112	1.2894	2.56802	2.90328	2.19727	3.72972
gene11120	9.95741	13.846	12.5669	11.4178	18.1965
gene11121	7.98164	5.73605	4.59355	8.82247	8.04885
gene11122	82.5103	87.6568	74.9334	87.8301	94.8486
gene11123	13.9638	13.5263	17.431	17.337	19.7506
gene11124	158.916	206.352	40.3309	118.92	112.935
gene11125	2.14127	4.96973	2.20251	0.899577	3.22228
gene11126	0	3.09657	0	1.98448	0
gene11127	11.2966	14.6028	13.4142	11.6502	16.806
gene11128	15.139	30.0174	17.7884	18.2542	38.1701
gene11129	4.13661	5.57219	5.80654	5.25545	5.78973
gene1113	11.7477	13.3984	12.4572	13.3431	11.5351
gene11130	15.3692	16.2724	14.9469	16.0268	16.5072
gene11131	39.1089	46.2483	44.9648	31.8104	47.6201
gene11132	36.468	39.1947	33.5411	40.7553	44.6037
gene11133	0.155888	0.0902462	0.199368	0.462684	0
gene11134	22.004	22.944	18.841	26.1823	21.6018
gene11135	27.2773	11.7448	11.0107	15.9391	13.1696
gene11136	4.20967	5.65395	3.2303	3.65465	5.05854
gene11137	0.93995	0.326492	0.721273	0.836947	0.760677
gene11138	14.7939	18.7181	14.7651	20.5495	22.2454
gene11139	1.79403	0.43208	2.60906	0.738411	1.83033
gene1114	1.27633	0.894827	0.312129	0.441868	0.532674
gene11140	62.9523	70.7029	59.4242	58.8701	74.7633
gene11141	0.0901343	0.0939245	0.35274	0.270867	0.323271
gene11142	7.72656	4.76664	5.23836	3.44511	6.90927
gene11143	2.15758	2.42275	0.610155	0.155265	3.20718
gene11144	28.9714	31.8452	32.0561	28.085	34.3436
gene11145	0.248065	0.615468	0.61525	0.0552203	0.687643
gene11146	41.4133	50.6102	48.5829	49.0938	63.4562
gene11147	6.74531	7.08852	8.38911	7.78761	9.39939
gene11148	9.78225	12.742	8.53857	9.79906	12.6844
gene11149	39.074	48.284	40.7299	38.3329	49.7982
gene1115	67.2246	75.3731	57.0299	68.5371	79.1173
gene11150	6.60537	9.2967	7.70172	10.4264	10.8394
gene11151	0	0.0118317	0.013069	0	0
gene11152	9.61412	9.55905	11.2594	11.7194	11.3973
gene11153	20.0866	23.0719	15.0281	19.5114	27.1037
gene11154	6.3193	5.61159	7.14719	7.55949	6.79176
gene11155	16.7337	18.7184	14.1902	20.8903	19.5971
gene11156	0	0	0	0	0
gene11157	0.606231	0.180492	2.59976	1.27238	1.17841
gene11158	0.628408	0.187095	1.65329	0.239805	0.247672
gene11159	0	0	0	0	0.053773
gene1116	0.531833	0.738929	0.163241	0.852394	0.313017
gene11160	0.399545	0.293891	0.135261	0.188344	0.0259364
gene11161	0.0761579	0.354918	0.17532	0.282551	0.0256802
gene11162	38.2663	38.081	33.0342	43.0596	41.9122
gene11163	0.294706	0.102366	0	0	0.108408
gene11164	31.3738	22.0201	17.7458	16.1998	21.773
gene11165	0.429066	0.670662	0.246933	0.358169	0.769433
gene11166	1.71773	1.42279	0.760444	1.41184	1.16653
gene11167	1.29296	0.612425	0.135294	0.941954	0.778285
gene11168	35.4579	37.241	22.7456	28.8269	36.5005
gene11169	0.0642294	0.097049	0.0924124	0.0857864	0.0283523
gene1117	0.141086	0.0970321	0.0941883	0.188437	0
gene11170	2.97971	4.32001	2.23678	3.97978	3.00234
gene11171	0.340221	0	0.261069	0.151469	0.375452
gene11172	0.588803	2.24973	3.16274	0.52428	1.29955
gene11173	3.01995	3.83774	4.91734	5.60758	4.79581
gene11174	21.3493	10.556	15.1705	10.0383	23.5601
gene11175	14.8757	16.0899	6.93565	8.55095	12.0524
gene11176	6.33341	4.7141	7.70651	6.04219	8.58681
gene11177	8.20399	5.69931	5.29382	5.64474	4.80112
gene11178	1.39401	0	0.458443	0	0.439534
gene11179	67.8741	56.7241	50.7813	46.5963	57.0759
gene1118	147.597	176.167	182.594	177.226	137.404
gene11180	6.32539	3.29569	4.61111	3.94256	4.42093
gene11181	24.4553	22.5257	17.3416	15.165	20.4817
gene11182	17.0509	13.6676	14.2583	8.36979	11.097
gene11183	0	0	0	0	0
gene11184	0	0.288893	0.319106	0.185141	0.305944
gene11185	19.0183	28.7194	26.714	17.8671	20.0985
gene11186	46.2677	55.7421	39.7132	52.661	55.9794
gene11187	0.499169	0.13004	0	0	0.137715
gene11188	0	0	0.144779	0	0
gene11189	0.395945	0.608746	0.777006	0.44214	0.573045
gene1119	0.593729	1.31164	1.09344	1.45912	0.812463
gene11190	9.7192	10.414	8.09009	11.3677	11.6346
gene11191	17.3198	17.0377	19.8971	17.4165	21.8807
gene11192	6.59302	8.87849	5.48726	9.61865	7.66753
gene11193	6.78444	9.12224	2.51906	7.89225	5.67563
gene11194	3.78803	6.32825	4.70618	6.58524	6.03821
gene11195	0.167562	0	0	0	0.369828
gene11196	16.234	10.4254	14.4489	10.274	7.39519
gene11197	0.203622	0.212185	0.234375	0.0679908	0.112354
gene11198	40.8278	32.3339	39.9876	18.4413	22.0363
gene11199	1.96221	0.487587	0.370635	0.819832	0.555232
gene112	34.0413	30.5077	34.0947	34.8856	43.2679
gene1120	6.33944	7.10775	8.49764	6.32354	7.26159
gene11200	0.0977578	0	0	0	0.163456
gene11201	0	0	0	0	0
gene11202	0.0973031	0	0	0	0.488088
gene11203	0	0	0	0.358776	0.296437
gene11204	0.0982167	0	0.342577	0	0
gene11205	0.264511	0	0.913379	0	0
gene11206	1.10411	0.57527	0.317716	0	2.13228
gene11207	1.15634	0.28352	0.86122	0.363396	1.05089
gene11208	0.835359	0.580324	0.641015	0.371909	1.53644
gene11209	9.0949	6.99636	4.05585	6.93227	7.04146
gene1121	22.2447	25.4804	22.8679	21.0922	25.8599
gene11210	3.97016	6.67275	4.59483	4.3054	6.07727
gene11211	5.10951	5.30594	3.27637	4.81721	6.1459
gene11212	0.263777	0.0907068	0.151808	0.820876	0.291092
gene11213	0	0.0873159	0.438397	0.451052	0
gene11214	0	0.383669	0	0.122015	0
gene11215	0	0	0	0.271092	0
gene11216	1.65762	1.5877	1.37563	1.66841	1.03269
gene11217	0	0.142781	0.473141	1.03582	0.580641
gene11218	5.62336	6.12319	2.7636	5.06339	5.50842
gene11219	0.274831	0.286388	0.158169	0.734143	0.454937
gene1122	28.0189	29.879	24.9925	27.6499	42.4745
gene11220	0.0423485	0	0	0.251957	0.424854
gene11221	0.380557	0.793119	0.054754	0.635351	0.472461
gene11222	737.111	698.11	633.975	681.174	612.888
gene11223	29.8418	33.3524	35.9505	24.9883	45.0469
gene11224	19.1755	24.2403	25.6899	19.3134	30.0073
gene11225	6.64132	6.03979	5.55953	10.3218	7.32906
gene11226	0.936864	1.46439	1.18619	4.37954	1.34404
gene11227	19.721	19.8417	14.7416	19.0737	21.5131
gene11228	14.3149	9.7416	10.0879	8.19398	7.73742
gene11229	12.7879	7.90243	11.4673	15.6897	11.6508
gene1123	42.2136	44.2202	46.3727	45.6987	47.8109
gene11230	100.329	128.814	109.29	127.905	146.727
gene11231	47.7664	56.867	51.0637	39.8948	56.8853
gene11232	32.2796	36.2378	30.4516	35.7797	37.0912
gene11233	2245.83	2306.48	2068.01	2480.49	2506.64
gene11234	3.75622	7.62233	2.73064	1.05619	1.30901
gene11235	0	0	0.223374	0.518395	0
gene11236	84.3968	79.2238	92.3261	71.7324	91.8535
gene11237	82.4128	84.543	61.4801	65.485	80.6019
gene11238	304.521	354.021	298.002	316.47	403.078
gene11239	35.8406	37.1319	36.8421	35.8331	35.8941
gene1124	21.8649	27.2266	14.1664	23.2341	19.4247
gene11240	48.3748	52.9837	41.9851	53.408	42.9801
gene11241	1.80865	3.29954	0.858006	5.96032	2.57068
gene11242	1114.63	886.093	792.618	1122.57	1182.75
gene11243	0.574746	0.344376	0.248081	0.249484	0.110996
gene11244	7.12123	5.6865	4.4993	7.70208	7.5597
gene11245	0	0	0	0	0
gene11246	17.5043	16.8062	14.5423	15.3662	18.577
gene11247	0	0	0	0	0
gene11248	0	0	0	0	0
gene11249	0.261241	0.272226	0.300696	0	0
gene1125	23.0918	22.6434	12.991	18.7998	21.7608
gene11250	0.321799	1.00599	1.852	0.859606	0
gene11251	2.02272	0.375878	0.282825	0.590729	0.388301
gene11252	0	0	0	0	0
gene11253	1.71116	4.58516	1.68822	2.93846	4.85578
gene11254	0.428265	0.901355	0.655098	0.590817	0.522362
gene11255	23.8036	24.8898	24.2916	23.3802	27.8031
gene11256	6.12309	5.48729	4.51063	5.56115	6.21659
gene11257	0.403227	0.274608	0.394689	0.0848125	0.35038
gene11258	0.0205445	0	0.0337819	0	0.0534411
gene11259	33.3707	38.6206	32.887	33.428	30.7973
gene1126	0	0	14.2951	0	0
gene11260	3.34797	3.68257	0.963403	5.09269	1.7447
gene11261	65.6162	82.0676	56.0001	73.7011	91.0113
gene11262	0.672026	0	0.580141	1.79515	2.03945
gene11263	22.5333	17.7905	20.3012	26.9942	36.2957
gene11264	25.0006	21.8133	19.5269	25.9049	28.1917
gene11265	13.9461	14.3642	11.5899	11.2911	14.7366
gene11266	0.212913	0	0.211952	0.240179	0.185746
gene11267	0.108318	0.0760405	0.0656194	0.0593917	0.0528469
gene11268	5.04663	5.55101	1.39842	5.36736	4.64103
gene11269	2.28713	2.6583	2.12629	2.11482	2.13567
gene1127	0	0	0	0	0.101932
gene11270	18.0833	18.28	23.4829	14.7598	16.5446
gene11271	32.7204	44.2901	27.1012	49.9196	31.4184
gene11272	6.35049	7.30806	8.19946	9.73571	10.177
gene11273	126.153	119.071	46.8372	89.6927	88.2788
gene11274	0.328621	0.521003	0.343217	0.347066	0.0883302
gene11275	0	0.843322	1.23892	0.270227	0
gene11276	206.102	255.454	163.172	233.284	317.525
gene11277	0	0	0	0	0.0808465
gene11278	1.28044	0.31395	0.346783	0.804795	0.831199
gene11279	1.81646	1.13571	0.627239	1.45566	2.80639
gene1128	170.137	143.547	114.778	123.966	110.611
gene11280	4.4092	6.5856	3.55258	4.12232	2.2707
gene11281	1.7981	1.34475	1.91046	2.58632	1.52638
gene11282	0	0	0	0	0
gene11283	0.0315291	0.0262839	0.0203229	0	0.136393
gene11284	1.22126	1.27261	1.02233	2.22429	1.34773
gene11285	0	0	0.19493	0	0
gene11286	25.1746	27.6078	18.7273	25.695	25.5978
gene11287	12.7433	11.9055	11.0263	13.9684	11.7353
gene11288	2.46926	2.72592	2.41461	2.10661	3.77965
gene11289	0.134969	0.213097	0	0	0
gene1129	0.114845	0.239349	0.26438	0.613559	0.126738
gene11290	55.7429	66.6046	55.3191	68.0078	72.4008
gene11291	45.9266	39.4725	48.5706	33.9471	42.6686
gene11292	17.2267	22.7075	15.7042	20.9837	22.0524
gene11293	18.9709	33.1125	24.2926	25.9715	42.6559
gene11294	167.973	160.258	153.205	161.558	170.932
gene11295	1.39855	1.92988	1.20446	1.54183	3.13258
gene11296	156.135	141.469	144.258	123.434	172.542
gene11297	0	0	0	0	0
gene11298	147.538	138.238	115.201	128.031	124.216
gene11299	142.363	140.162	112.906	123.226	134.355
gene113	1120.13	1274.36	1080.78	1258.1	1432.82
gene1130	20.4279	21.4997	23.2779	18.1438	22.7687
gene11300	48.4497	58.2109	26.3229	51.672	38.0054
gene11301	27.9868	30.4893	20.8657	32.2827	27.9603
gene11302	29.3678	24.5191	14.8653	17.9582	19.7187
gene11303	5.35281	5.86306	4.38468	6.31598	5.50847
gene11304	18.6459	21.6476	19.3083	22.1418	21.1094
gene11305	27.2674	32.2887	32.2574	38.4423	37.8418
gene11306	23.2353	26.8888	25.8508	26.5661	36.4517
gene11307	10.989	11.2984	13.1546	11.9375	12.4504
gene11308	0.103395	0.326492	0.840284	0.209237	0.864405
gene11309	30.2357	32.9259	22.8352	30.6835	31.0496
gene1131	55.4317	61.8224	61.8367	60.0458	65.1318
gene11310	0.235303	0.306497	0.20313	0.235707	0.259669
gene11311	15.8342	19.9201	16.4362	21.0717	20.651
gene11312	0	0	3.3633	0.616538	0
gene11313	99.8381	92.0977	97.5848	81.7565	123.181
gene11314	29.9693	36.4625	35.0549	39.3786	56.1342
gene11315	35.7351	34.082	21.1761	23.6621	19.8014
gene11316	0.68455	0.348742	0.157587	0.589217	0.738651
gene11317	0	0	0	0	0
gene11318	12.3975	14.5681	9.71568	10.9215	14.8457
gene11319	40.9482	36.4237	32.8853	42.4222	50.1713
gene1132	33.0754	37.5047	29.8053	40.6305	38.6136
gene11320	21.5393	29.4456	24.8323	28.861	26.292
gene11321	7.06232	5.64956	5.99406	5.14506	5.03832
gene11322	18.2837	10.4619	12.2137	13.8454	14.6824
gene11323	0.403523	0.194073	0.214369	0.456039	0.308291
gene11324	146.535	158.765	124.077	137.098	167.976
gene11325	36.7414	35.3465	29.5959	33.5716	41.3953
gene11326	22.4834	17.6589	17.8674	16.1726	16.4982
gene11327	20.086	23.9476	21.8698	24.8938	17.3733
gene11328	48.1175	56.4954	44.4722	50.2682	65.6131
gene11329	13.0593	16.2178	13.2438	18.543	23.5763
gene1133	2.46888	2.24074	1.74172	2.44653	1.93355
gene11330	37.6719	45.357	39.3844	44.6751	63.9748
gene11331	57.1912	58.4136	59.6246	58.464	82.1165
gene11332	1.47226	3.80204	1.45786	0.945683	0.918433
gene11333	0.499169	1.04032	1.14912	0	0.55086
gene11334	20.9297	18.8222	20.0206	17.615	19.4058
gene11335	2.69	3.64406	1.96097	2.63475	4.05704
gene11336	16.4411	13.5439	24.0388	13.947	30.5254
gene11337	13.5059	14.1376	15.2644	19.2224	17.6696
gene11338	21.4485	22.0201	22.2555	24.6958	46.1731
gene11339	26.9342	31.7563	28.5277	30.2317	39.9102
gene1134	5.52566	7.11901	3.81612	5.23324	5.21091
gene11340	0.169655	0	0	0	0
gene11341	0.127754	0.131995	0.195787	0.217519	0.199693
gene11342	0.117981	0	0.0406587	0	0
gene11343	17.7948	17.6681	22.7266	16.3119	20.0082
gene11344	479.712	422.671	418.86	529.653	399.464
gene11345	93.2569	48.5426	40.1933	62.8364	49.4817
gene11346	0.267382	0	0.347103	0.268513	0
gene11347	19.5466	18.8272	16.2964	18.7688	20.1716
gene11348	0.0314041	0.163623	0.144588	0.125832	0.138625
gene11349	0.824018	3.94987	4.55265	2.42127	0.909349
gene1135	1.243	1.40511	0.947921	1.79511	1.72071
gene11350	16.6023	21.0446	17.541	16.3826	20.6459
gene11351	13.5225	15.6666	12.2778	16.5279	17.1783
gene11352	1.25665	0.501723	0.923656	1.17897	0.265668
gene11353	0	0	0	0	0
gene11354	0	0	0	0	0
gene11355	131.595	108.556	50.266	76.026	68.4264
gene11356	27.8165	36.8579	32.1199	28.9623	42.3678
gene11357	2.28248	2.70779	3.0718	1.50082	3.41012
gene11358	0.1308	0.218081	0.178257	0.0929403	0.0640892
gene11359	33.007	35.5356	33.8568	39.2491	44.4163
gene1136	0.756698	0.262839	0	0.168444	1.53094
gene11360	40.5823	48.6321	18.8969	34.739	30.3315
gene11361	7.75454	7.05342	1.51283	3.94976	5.22156
gene11362	4.88843	8.00485	6.29658	3.42001	6.03687
gene11363	9.72754	9.10224	7.99763	7.68934	14.2401
gene11364	9.1327	10.1706	8.34541	15.7362	11.4633
gene11365	58.2562	65.2258	53.3056	63.0132	43.8166
gene11366	10.3347	14.3152	7.83363	10.9416	10.4313
gene11367	71.6704	28.4208	54.4803	80.5329	99.4726
gene11368	33.087	33.3086	53.1577	43.9776	50.0804
gene11369	0.796547	2.71855	2.67236	2.09066	2.41904
gene1137	1.87519	1.79977	3.29439	3.95454	2.34166
gene11370	0.437706	0.114028	0.377859	0	0.362274
gene11371	0.609562	1.69385	0.935498	0.542764	0.672685
gene11372	0.354433	0.40537	0.716421	0	0.476995
gene11373	8.68057	7.57406	4.97189	8.21009	5.36267
gene11374	2.81011	2.94755	2.64202	2.76931	3.40839
gene11375	0.427859	0.222925	0.246239	0.285729	1.18041
gene11376	12.5013	11.4253	6.36905	10.2646	7.23716
gene11377	0.818107	0.655989	1.65709	0.50377	0.659532
gene11378	9.27277	7.77217	7.42485	9.42332	7.05794
gene11379	16.5508	17.7171	20.0895	17.0816	15.4419
gene1138	47.2865	51.0927	13.1322	51.7598	52.4954
gene11380	0.35482	0.246493	0.544543	0.236953	0.391563
gene11381	0.855756	1.42679	0.7092	1.32584	0.906599
gene11382	0	0	0.269801	0	0.194005
gene11383	0.550724	0	0.633899	0	0
gene11384	5.36584	5.88309	6.39297	6.29735	7.42587
gene11385	38.3966	39.8028	37.5202	35.5245	44.359
gene11386	9.16437	9.01394	10.444	8.92764	16.4551
gene11387	9.01808	8.28079	10.6627	9.10155	8.26406
gene11388	3.70895	4.57843	3.80935	6.82095	4.37639
gene11389	0.0497461	0.192731	0.104241	0.211252	0.170323
gene1139	1.17458	0.509986	1.01398	1.83026	1.62026
gene11390	0.161514	0.28023	0.20171	0.341921	0.0552544
gene11391	0.488485	1.43885	2.24904	0.869909	0.838552
gene11392	43.6687	50.1831	54.022	39.2467	69.8091
gene11393	53.6572	46.4611	43.8875	47.0243	48.0157
gene11394	25.1032	25.9799	17.2346	21.2048	21.5858
gene11395	0.17011	0.709054	1.37061	0.227204	0.563178
gene11396	0	0	0	0	0.0355725
gene11397	10.2179	11.3975	6.54318	10.3797	7.06739
gene11398	55.076	65.3777	52.0367	56.989	83.1456
gene11399	13.4423	14.5263	14.3263	10.6393	20.8779
gene114	93.8081	106.54	86.2711	101.855	135.566
gene1140	61.9646	57.8925	72.2748	61.9503	56.4616
gene11400	59.5686	69.9373	70.6129	60.3225	77.4533
gene11401	57.8224	69.8989	64.7591	68.464	89.7824
gene11402	35.8894	46.988	45.8997	31.1371	37.9134
gene11403	7.73913	9.02273	10.8483	8.39207	14.2061
gene11404	0	0	0.354218	0.411025	0
gene11405	7.33671	12.1316	15.777	5.63301	11.4902
gene11406	12.9875	10.876	31.5508	24.9319	20.458
gene11407	1.26068	1.68904	1.31289	1.6838	1.78873
gene11408	54.6766	63.0698	48.2455	63.1259	65.2089
gene11409	19.3414	10.4982	6.75214	11.2983	15.0583
gene1141	42.1201	45.9004	36.7025	49.5878	39.335
gene11410	75.6251	55.269	74.8571	55.5801	72.2061
gene11411	0.0677028	0	0	0	0
gene11412	0	0.113636	0.0602495	0.652512	0
gene11413	25.6588	23.5246	22.9427	28.6813	38.2811
gene11414	0.899124	0.790132	3.09998	1.66022	0.9145
gene11415	0	0	0	0	0.0434529
gene11416	4.12177	6.16472	2.56749	5.44037	4.92319
gene11417	5.88724	3.86759	1.32581	2.56407	3.53092
gene11418	30.7408	29.3	28.3069	28.3575	32.3863
gene11419	9.04932	12.7611	6.79306	11.4296	7.59836
gene1142	0	0.182487	0	0	0
gene11420	0.322709	0.448373	0.185724	0.359182	0.237418
gene11421	0	0	0	0	0
gene11422	0	0	0	0	0
gene11423	0	0.213327	0	0	0
gene11424	0	0	0	0	0
gene11425	0.478941	1.20472	1.10255	0.352041	0.992041
gene11426	0.480591	0.670975	0.690662	0.704208	0.837245
gene11427	1.05342	4.2227	1.96564	0.8739	2.5272
gene11428	226.262	187.382	27.17	150.716	119.234
gene11429	0.206049	0	0	0.275204	0
gene1143	56.7013	70.6136	57.8402	69.4785	87.5638
gene11430	22.3439	19.1322	13.5571	11.5671	14.1448
gene11431	15.987	20.121	19.8354	11.3696	27.724
gene11432	17.7448	18.7316	12.5533	22.2769	16.446
gene11433	2619.05	2480.63	2154.21	2540.81	2988.25
gene11434	68.8257	85.1057	70.1154	74.678	89.8303
gene11435	14.6465	15.5584	11.7709	11.7616	16.4767
gene11436	31.8581	34.8744	28.8912	29.6564	33.7367
gene11437	0.256581	0.475325	0.131259	0.114232	0.220228
gene11438	0.160915	0.186313	0.113188	0.202982	0.226905
gene11439	0.0231254	0.0421712	0.053236	0.0463303	0.0638004
gene1144	0.407058	1.37857	0.368135	0.543677	0.513384
gene11440	0.0914971	0.130248	0.126003	0.418991	0.122609
gene11441	18.0272	16.0472	12.6336	20.9235	15.8931
gene11442	22.5141	24.7351	21.6505	23.8258	29.0527
gene11443	0.0903913	0	0	0.323553	0.0678312
gene11444	108.314	102.091	98.3771	100.29	87.5466
gene11445	11.4725	11.7084	12.2298	11.4132	12.8889
gene11446	13.1446	12.5233	13.0548	8.82827	14.9202
gene11447	0	0	0.228801	0.179388	0.160076
gene11448	517.626	369.321	363.141	307.37	375.293
gene11449	112.724	113.695	99.7973	115.131	128.388
gene1145	8.39369	12.8898	5.59343	11.2108	9.01913
gene11450	46.6708	33.5029	15.2205	39.8249	20.4584
gene11451	5.61077	3.11318	1.92906	1.65449	3.53817
gene11452	0.946709	0.657679	0.847536	0.421483	0.696497
gene11453	0.0823182	0.183391	0.163363	0	0
gene11454	0.465442	0.239842	0.158464	0.668906	0.201317
gene11455	41.6148	49.7478	45.4376	48.0496	44.5293
gene11456	78.4767	72.8477	46.5477	62.3868	65.8462
gene11457	55.4482	54.4516	45.0244	62.9757	61.9895
gene11458	65.9156	41.3435	42.8639	71.5343	76.5998
gene11459	0.885228	0.381367	0.208825	0	0
gene1146	0.273084	0.609787	0.134712	0.260527	0.344415
gene11460	19.3579	22.0594	24.7573	23.2846	27.1092
gene11461	0.0154621	0	0.0889864	0.103258	0.0639871
gene11462	0.0293728	0.0754685	0.0552299	0.084751	0.0653239
gene11463	0.228636	0.275661	0.233805	0.205684	0.320082
gene11464	0.512637	0.662341	0.745599	0.593017	0.700644
gene11465	4.27494	4.4547	7.08563	8.05434	4.46589
gene11466	0.0561013	0.0292302	0.22601	0.177959	0.0309554
gene11467	34.25	36.9464	29.8731	36.9371	40.1444
gene11468	41.2837	41.8113	32.569	26.3307	49.654
gene11469	221.628	253.442	232.406	219.173	274.537
gene1147	0	0	0	0	0
gene11470	8.83865	9.76611	8.33178	8.14146	10.2584
gene11471	0	0.110484	0.0915288	0	0.0804409
gene11472	0	0.0810969	0.0671836	0	0.0590449
gene11473	8.81041	9.73491	8.30516	8.11545	10.2257
gene11474	63.4554	69.7444	61.0412	69.6095	63.9723
gene11475	3626.3	3605.63	3414.24	3669.5	4240.76
gene11476	51.5428	57.5644	55.07	51.1533	54.1153
gene11477	376.845	393.871	439.55	400.508	320.23
gene11478	0.22835	0.679865	1.53948	0.701478	0.161998
gene11479	44.064	52.9764	39.7743	50.8863	61.3188
gene1148	12.0904	7.01703	11.8691	9.3479	10.5083
gene11480	56.7066	60.3431	59.0481	55.0389	96.2547
gene11481	0.758458	0.592764	0.654755	0	0.837
gene11482	0.533973	0.185476	0	0.475458	0.785691
gene11483	2.08179	1.44622	0.798734	1.29756	1.32737
gene11484	0.389359	0.299848	0.207004	0.21378	0.496165
gene11485	26.2355	30.4492	27.6208	24.0826	28.1
gene11486	47.4837	105.113	161.461	70.8914	56.2417
gene11487	6.78793	6.75759	10.3942	6.6377	7.89215
gene11488	0.6543	0	1.2552	0.8739	1.20343
gene11489	10.1133	9.99115	6.87862	10.3061	7.57328
gene1149	13.4055	9.77722	13.6499	11.9512	11.648
gene11490	1.43174	2.23792	2.74663	3.44209	0.842671
gene11491	0.670841	0.174762	0.386078	0	0.925386
gene11492	0	0	0	0.27135	0
gene11493	0.154495	0	0	0	0
gene11494	0.363639	0.505241	0.279039	0.809476	0
gene11495	9.94103	10.4157	6.72164	9.9037	7.88315
gene11496	0.100096	0.43972	0.492483	0.48758	0.545812
gene11497	45.6287	51.4098	44.1344	51.3831	47.2507
gene11498	28.6777	32.0037	26.8754	29.2446	37.6347
gene11499	29.7041	31.1542	28.6399	25.762	34.2701
gene115	18.2771	18.8574	17.1382	20.6163	17.9922
gene1150	1.2367	1.2018	2.26398	0.33959	2.26264
gene11500	36.3812	36.186	32.2014	35.9938	33.9883
gene11501	273.783	137.849	108.242	94.6692	86.1583
gene11502	12.5517	16.2186	14.1769	15.2891	13.6299
gene11503	180.433	105.487	84.7916	71.5418	69.2065
gene11504	36.1605	46.998	39.5554	45.579	57.0647
gene11505	844.762	771.384	1075.03	808.253	717.688
gene11506	84.3889	97.7593	83.8516	83.2986	89.7254
gene11507	27.4896	28.2558	21.0942	20.2312	24.9707
gene11508	10.022	12.2384	13.7887	11.3987	15.0345
gene11509	32.8553	39.4357	28.2325	41.7015	42.9646
gene1151	0.778782	0.101006	0.0423194	0.236603	1.20984
gene11510	0	0	0	0.525081	0
gene11511	3.07243	1.76089	3.53645	2.25699	0.678118
gene11512	618.897	518.972	514.413	479.825	446.271
gene11513	52.1	56.1775	37.2996	46.7361	59.6971
gene11514	0.210046	0.114198	0.0972334	0.134173	0
gene11515	40.5908	45.1691	45.1964	50.1799	44.8526
gene11516	2.84564	2.86645	1.6377	2.87164	2.44247
gene11517	14.171	14.8705	11.3188	13.3552	13.0077
gene11518	27.9807	36.4746	31.6514	33.9353	32.0614
gene11519	25.1411	17.7626	17.3892	19.1119	23.5924
gene1152	44.1431	56.6048	44.5999	53.2266	55.2096
gene11520	14.7531	12.177	12.6098	12.6812	18.5376
gene11521	7.5273	7.09916	7.67708	6.99937	10.8304
gene11522	17.0993	17.157	14.9547	20.4447	25.3386
gene11523	3.00118	3.22936	1.95251	2.52706	2.69997
gene11524	0.167415	0	0.0770797	0	0
gene11525	0.0767178	0.0799438	0	0	0
gene11526	0.722263	0.396124	0.131265	0.406178	0.482429
gene11527	31.7773	24.9394	18.0579	33.1415	31.5346
gene11528	36.731	35.2578	24.7641	41.8845	43.0524
gene11529	1.41904	1.01591	1.32164	1.30211	1.08782
gene1153	3.13357	4.77241	2.84384	5.07061	3.19206
gene11530	15.9944	17.904	16.1088	15.6046	14.8928
gene11531	14.4443	14.9377	8.56481	10.9615	15.457
gene11532	3.76601	2.45273	1.35462	3.14373	1.5585
gene11533	11.6112	8.55306	5.99112	8.55624	7.95326
gene11534	28.2947	34.1498	47.4091	23.2009	29.6437
gene11535	319.53	405.899	164.064	306.326	342.369
gene11536	3.51808	4.24108	2.69961	3.04042	2.74051
gene11537	10.9799	9.33695	9.89074	11.0846	11.9953
gene11538	16.6227	11.2082	11.8176	15.0188	13.848
gene11539	9.97875	12.2334	12.1615	14.1119	5.82993
gene1154	0	0	0.0386078	0.0447996	0
gene11540	0.847716	0.929452	0.587569	0.467661	1.04125
gene11541	0.846896	0.928552	0.587	0.467208	1.04025
gene11542	136.612	149.435	170.863	179.243	176.752
gene11543	6.35395	4.89783	4.2746	5.25078	8.34068
gene11544	0.633944	0.0880803	0.11675	0.575764	0.251853
gene11545	0.633944	0.0880803	0.11675	0.575764	0.251853
gene11546	30.4934	31.5271	41.3342	40.6822	38.3134
gene11547	55.9256	71.7787	44.9486	58.402	108.082
gene11548	13.7609	17.215	14.8362	16.1971	19.8338
gene11549	16.1806	17.4581	18.7814	17.5659	20.235
gene1155	16.1526	17.4652	13.8941	13.4546	14.471
gene11550	10.7574	10.4787	7.67148	10.5026	14.194
gene11551	0.217913	0.227076	0.125412	0.29105	0.180359
gene11552	0	0.255607	0	0.109206	0.0902311
gene11553	23.491	20.3664	19.468	19.0761	22.8128
gene11554	10.3614	12.1387	9.59745	11.56	13.1258
gene11555	2.7169	1.8464	2.8553	2.8399	2.60718
gene11556	4.55368	3.83801	3.23735	6.08201	4.87744
gene11557	15.5698	19.2415	17.3289	18.2175	24.1402
gene11558	139.274	145.758	207.233	177.3	208.326
gene11559	43.3856	36.8492	38.6507	40.8803	52.4694
gene1156	19.5024	19.8181	22.7663	19.9516	30.7566
gene11560	115.21	127.876	116.636	119.138	141.973
gene11561	19.0096	8.49605	21.981	11.8796	35.4126
gene11562	60.5816	58.5605	52.8995	62.0073	69.3121
gene11563	117.377	126.125	98.8667	118.714	165.611
gene11564	0	0	0	0	0
gene11565	0	0	0.453223	0	1.08632
gene11566	0.74208	0.350725	0	0	0.22375
gene11567	66.2356	60.879	55.3909	54.5501	67.6076
gene11568	1.39683	1.11966	0.865732	1.29159	0.9486
gene11569	0	0	0	0.233468	0
gene1157	0.123817	0.774143	0	0.165373	1.09311
gene11570	0.605037	0.42032	0	0	0.667691
gene11571	1.95777	1.45721	0.321921	2.2413	3.08644
gene11572	0.847485	0.602129	0.48774	0.565961	0.765201
gene11573	0	0	0.249608	0	0
gene11574	0.366442	0.286388	0.369062	0.305893	0.101097
gene11575	23.0256	22.3439	20.712	21.6619	20.6416
gene11576	2.20801	3.75807	2.45677	1.67114	7.22876
gene11577	0.495269	1.72376	3.99048	0.330747	5.27973
gene11578	51.3687	52.8609	42.1055	54.9119	52.9999
gene11579	0.123944	0.493334	0.116937	0.309375	0.224228
gene1158	0.506962	0.301875	0.583528	0.19346	0.799229
gene11580	57.4192	67.456	60.8154	63.6501	69.8437
gene11581	28.3003	24.4312	25.9235	19.4497	39.8125
gene11582	32.7672	32.5812	29.8465	31.9605	36.9885
gene11583	14.3413	15.5502	16.7303	17.1701	22.0999
gene11584	42.3983	50.8231	42.0047	50.5774	66.994
gene11585	2.53284	2.86886	1.1408	1.56889	2.47106
gene11586	4.63862	3.22245	8.3054	2.75353	11.4466
gene11587	22.3123	25.035	27.7691	26.37	26.6794
gene11588	5.04235	5.78513	3.51751	4.42177	4.21554
gene11589	0.0632159	0.0413109	0.113461	0.207504	0.020101
gene1159	0.225345	0.0283404	0.0245962	0	0.109334
gene11590	103.833	102.16	67.9288	96.8838	102.327
gene11591	0	2.07519	1.14611	0	1.09884
gene11592	33.1952	36.714	25.3805	31.6917	40.7324
gene11593	19.3715	18.2378	24.6285	14.3585	24.3004
gene11594	18.0611	21.4555	23.0756	21.7106	31.8902
gene11595	0.0394162	0.198523	0.102081	0.557163	0.0906207
gene11596	67.1044	68.7053	59.9333	67.0241	69.7437
gene11597	0.116677	0.0243166	0.268597	0.0311673	0
gene11598	0.374745	1.0088	0.575124	1.37643	0.585865
gene11599	0.0863292	0.179919	0	0	0.095269
gene116	13.6921	13.4687	13.4597	17.4621	20.9698
gene1160	0	0	0	0	0
gene11600	0.0724784	0.46222	0.140154	0	0.0639871
gene11601	0	0	0	0	0
gene11602	31.6413	31.4572	27.5403	34.3463	40.3468
gene11603	93.6812	96.8471	81.7695	106.335	132.3
gene11604	24.1688	22.7534	24.9411	25.0452	31.2701
gene11605	0.647433	1.93964	0.279455	0.324273	0.803787
gene11606	0.143752	0.149796	0	0.575994	0.158638
gene11607	27.8248	30.5569	24.4248	30.4065	37.6849
gene11608	0.524954	0.0523585	0.403112	0.200326	0.248278
gene11609	10.6469	13.9227	13.6967	8.64371	16.1267
gene1161	0.0613495	0	0	0.0744908	0
gene11610	76.7682	40.169	105.643	73.551	210.022
gene11611	0.0361108	0.0225775	0.026786	0	0
gene11612	0.0235625	0.124521	0	0.0314707	0
gene11613	1.04469	1.60701	0.744385	1.12954	2.69004
gene11614	0	0	0	0	0
gene11615	0.0399545	0.0333077	0.0257537	0	0.128748
gene11616	167.747	176.262	136.388	131.338	186.278
gene11617	229.323	201.718	175.198	188.987	191.383
gene11618	0.0706186	0.0355253	3.60173	0.0455338	0.0779315
gene11619	9.07398	9.39123	7.7445	8.16207	8.31064
gene1162	11.7943	1.53628	20.7028	1.57528	12.6903
gene11620	5.80349	8.0799	6.21458	5.36872	11.6015
gene11621	0	0	0	0	0
gene11622	28.9314	32.3096	28.023	27.7198	38.0719
gene11623	25.2836	25.9325	31.2985	27.8226	36.6759
gene11624	0	0	0	0	0
gene11625	18.6818	18.5001	20.3013	16.428	17.9273
gene11626	0.499334	0.838785	0.844847	0.389949	0.644388
gene11627	17.9446	14.7141	15.745	15.3233	17.6927
gene11628	7.51484	10.8165	4.05007	4.39749	4.77058
gene11629	1.72949	1.70769	1.18676	0.726907	0.747418
gene1163	21.856	23.1525	29.4655	25.6433	24.519
gene11630	0.54729	4.84758	0.314973	1.09646	1.50991
gene11631	0	0.0522779	0.23273	0.406097	0.251652
gene11632	8.01645	9.64979	6.20447	5.72269	7.62637
gene11633	42.3622	42.8892	44.112	54.8686	73.3158
gene11634	215.134	212.026	250.916	246.172	260.003
gene11635	30.5868	26.5082	27.8862	23.0554	37.4304
gene11636	16.0313	16.1343	14.9828	14.8236	13.9112
gene11637	28.6745	34.0137	32.9501	32.9685	53.5835
gene11638	17.597	16.2212	21.0337	12.2035	22.0334
gene11639	1.54558	1.32872	1.2453	2.27074	2.98485
gene1164	15.9424	18.8805	14.2069	19.6232	19.0412
gene11640	30.0542	35.3939	37.855	41.0473	47.1289
gene11641	0.0810918	0.0797187	0.278256	0.574238	0.435627
gene11642	2.49142	5.4761	4.87061	0.136713	0.829118
gene11643	0.365175	0.278549	0.896138	0.0975474	0.161196
gene11644	0.31957	0.0541477	0.0747631	0.242909	0.215039
gene11645	0.0533224	0.0555647	0.27898	0.144596	0.208629
gene11646	0.0401282	0.0418156	0.314923	0.108817	0.157006
gene11647	2.48607	5.46434	4.86015	0.13642	0.827337
gene11648	131.092	160.459	120.588	149.539	195.112
gene11649	0.0825448	0.0860159	0	0.110249	0.546556
gene1165	4.52612	2.81592	2.60739	4.27863	5.07113
gene11650	0.194594	0	0	0.17327	0.286327
gene11651	0.339485	0.465475	0.555287	0.286374	0.646748
gene11652	0.667466	0.556427	0.734469	0.891484	0.572572
gene11653	40.1498	42.0936	38.9167	42.3356	51.49
gene11654	0.707878	0.655685	2.3991	0.735358	1.30197
gene11655	0	0	0	0	0
gene11656	18.4253	20.8856	13.4641	21.1652	20.5661
gene11657	7.9909	10.5474	29.1262	18.4996	8.81839
gene11658	8.92557	11.1611	10.9058	13.3884	15.6082
gene11659	37.3473	40.8706	24.5369	37.2774	41.2148
gene1166	0.912463	0.4075	0.150039	0.174101	0.431551
gene11660	0.586889	0.231655	0.255881	0.296918	0.122664
gene11661	36.6745	24.5679	19.2975	20.2931	23.127
gene11662	55.4964	64.965	53.923	64.3758	63.3312
gene11663	67.1342	75.7791	60.3243	70.5425	82.4983
gene11664	0.701783	0	0.945094	0	0.774456
gene11665	79.7768	95.2084	73.4703	78.7937	103.713
gene11666	0	0	0	3.52797	0
gene11667	0.260972	0.363728	0.22529	0.0871401	0.143998
gene11668	62.777	86.9908	71.1617	82.5176	99.9512
gene11669	0	0	0	0	0
gene1167	22.6038	1.1371	10.407	11.8678	18.2353
gene11670	1.06875	0.857606	0.255488	0.464905	0.543185
gene11671	41.6423	38.1015	35.9486	33.2354	47.0754
gene11672	11.5111	13.299	14.3057	12.3664	19.5149
gene11673	0.546111	0.853614	0	0.7294	0.451998
gene11674	13.0963	9.71931	25.8835	7.50863	5.14648
gene11675	36.0982	46.1255	48.314	28.7447	52.5536
gene11676	0.330754	0.0689324	0	0.265058	0
gene11677	0	0	0	0	0
gene11678	0.130845	0	0.150606	0	0
gene11679	97.5498	97.4051	116.006	52.0123	31.9814
gene1168	19.8633	24.9077	1.19435	27.0248	34.2298
gene11680	25.0362	30.126	21.2209	23.6016	27.3415
gene11681	21.0694	26.6825	16.6543	24.896	16.4182
gene11682	65.747	251.597	42.3276	76.4025	100.43
gene11683	86.0332	73.8573	68.9169	71.0577	81.3373
gene11684	10.9937	12.7029	9.68422	11.1374	15.2683
gene11685	64.0077	71.0772	65.4886	68.8763	79.5753
gene11686	51.6001	50.625	40.0795	136.619	77.6292
gene11687	14.847	11.4193	12.2067	11.3315	12.0933
gene11688	22.8846	22.4036	18.1613	22.924	27.0488
gene11689	107.377	122.647	86.5444	237.933	220.995
gene1169	5.80444	4.67386	3.01155	3.31833	3.80934
gene11690	1.13882	0.39557	0.728232	0.338009	0
gene11691	0.171336	0.714165	0.197213	0.686523	0.283618
gene11692	0.594943	0.413307	0.684796	0.529747	0.437701
gene11693	3.15828	2.00327	1.73861	2.75105	2.42458
gene11694	13.8618	19.4281	16.0351	18.8844	21.6455
gene11695	16.3178	16.9441	9.92023	16.1157	17.3101
gene11696	2.49722	3.01311	1.51283	3.86199	3.04591
gene11697	4.81477	2.96473	2.89692	2.7769	3.26047
gene11698	15.2731	10.518	11.0065	14.0133	10.2594
gene11699	0.554147	0.519705	0.446488	0.44408	0.366919
gene117	38.2673	36.7082	32.8239	34.3072	41.9987
gene1170	18.3419	20.6043	12.7271	29.189	22.251
gene11700	16.8233	19.8682	16.0445	16.5847	22.2785
gene11701	8.11807	10.9448	7.4919	9.78927	15.398
gene11702	17.156	31.3022	22.1696	24.5512	36.9109
gene11703	28.769	39.1007	29.2182	35.1986	40.8822
gene11704	31.981	29.623	25.9893	29.6629	34.8843
gene11705	0.313437	0	0.406889	0.314763	0.0442121
gene11706	9.5228	11.2258	7.71719	14.7831	9.93207
gene11707	59.3704	70.5284	72.2095	62.6443	77.967
gene11708	51.7575	45.4737	57.7053	43.1037	54.6533
gene11709	30.0166	42.1531	30.0963	38.3683	39.5727
gene1171	7.75493	7.9371	3.61134	5.95632	4.81251
gene11710	361.987	322.061	396.327	348.637	340.35
gene11711	37.1662	45.013	38.3653	37.8183	45.9097
gene11712	6.91576	10.3185	10.2518	8.25719	9.48208
gene11713	12.1312	19.7086	18.8011	15.82	17.9202
gene11714	0.103596	0.107952	0.119242	0.0351076	0.284956
gene11715	18.5622	31.2994	28.1913	24.7921	38.6066
gene11716	107.821	131.073	109.212	115.598	140.704
gene11717	0.212495	0.147621	0.0815294	0.283814	0.0781667
gene11718	33.5447	29.4572	21.1719	27.0241	25.2665
gene11719	118.699	116.783	101.354	111.684	126.883
gene1172	0.176185	0.211259	0.05556	0.145058	0.189103
gene11720	28.5906	34.8228	30.6862	37.988	35.9767
gene11721	36.6213	32.5385	44.2904	41.2329	42.7565
gene11722	34.6393	31.2369	21.8523	30.2503	20.2159
gene11723	110.083	145.954	129.627	134.279	194.322
gene11724	18.937	16.3738	15.8989	18.4074	18.6101
gene11725	167.835	187.871	162.985	192.899	199.35
gene11726	0	0	0	0	0
gene11727	0	0	0	0	0
gene11728	115.273	102.862	107.812	103.715	116.558
gene11729	21.3689	24.963	19.9359	25.3863	33.635
gene1173	6.85098	5.85404	2.52342	3.29412	3.78022
gene11730	22.4368	18.9689	19.2472	24.3129	19.7381
gene11731	0.380976	0.0793993	0.408696	0.203536	0.504514
gene11732	0.524389	0.450236	1.06265	0.330464	0.542014
gene11733	10.6968	11.1466	9.10494	9.39457	8.8782
gene11734	2.67237	8.93437	5.63928	5.35391	7.12699
gene11735	0.253072	0	0.145646	0.169004	0
gene11736	29.3613	37.2513	27.5675	35.4245	38.6668
gene11737	0	0	0	0	0
gene11738	0.2908	1.21211	1.33888	0.7768	3.20914
gene11739	42.3842	53.6443	49.5183	47.9844	61.1265
gene1174	162.231	137.56	123.298	155.096	114.999
gene11740	241.408	258.522	234.471	273.03	232.876
gene11741	17.082	25.908	12.255	19.6116	13.6863
gene11742	2.16117	1.30933	0.231402	1.40969	0.388251
gene11743	23.2539	30.506	64.2859	28.9786	44.7938
gene11744	0.397042	0.206869	0.914015	0	1.75263
gene11745	0.431534	0.899361	3.54792	1.39975	3.94584
gene11746	24.4204	33.3514	24.4886	25.945	29.8075
gene11747	47.4761	52.2064	40.5751	50.0646	56.9201
gene11748	0	2.7148	3.7484	3.47964	0
gene11749	15.9234	27.6957	18.1037	16.7327	21.1041
gene1175	0	0	0	0	0
gene11750	35.1163	45.6111	39.5642	46.0334	53.8026
gene11751	1.00626	0.524287	1.15824	3.69596	0
gene11752	38.258	38.425	32.4896	38.6241	47.4114
gene11753	10.8248	2.77661	0.575061	6.00557	2.38915
gene11754	11.5746	10.1835	12.0462	13.7004	10.708
gene11755	85.47	82.2063	69.0375	84.4486	90.184
gene11756	38.9962	42.1495	38.6544	36.6236	38.6629
gene11757	23.428	27.1758	6.41461	24.8594	29.6754
gene11758	0.583086	0.506338	0.391504	0.194696	0.643467
gene11759	5.05471	6.14514	3.47471	5.62599	4.8034
gene1176	11.7249	10.0503	41.2853	16.6704	17.2521
gene11760	1.81894	2.91273	0.657249	1.21164	1.6465
gene11761	1.50343	0.847947	3.89359	0.502003	0.690605
gene11762	1.86454	0.38859	2.14614	0.747099	1.02881
gene11763	0	0	0	0	0
gene11764	0	0	0	0	0
gene11765	1.15965	0.453157	1.83534	1.16165	0.479903
gene11766	6.82418	6.43389	3.45986	5.42532	4.93091
gene11767	1.32995	0.639636	1.2953	1.22976	0.338694
gene11768	8.69889	6.71799	8.79285	6.84132	5.94499
gene11769	37.594	39.3877	32.2186	41.1152	43.2532
gene1177	5.18961	5.32744	5.38493	6.02134	4.53094
gene11770	0.239979	0	0	0	0.26483
gene11771	0.226679	0.236211	0.521827	0.605515	0.750456
gene11772	5.33224	8.21122	9.95649	6.64708	7.58436
gene11773	0.323631	0.208173	0.0574859	0.266821	0.0683425
gene11774	3768.19	3492.24	3496.74	3893.37	3710.96
gene11775	48.26	66.2374	54.8441	59.4152	100.21
gene11776	24.7545	26.9877	26.0389	25.2138	31.6796
gene11777	62.3272	59.1905	51.0564	62.762	59.4929
gene11778	1.29769	1.05175	0.995784	1.73322	1.90943
gene11779	0.215383	0.67332	0.340879	0.0719178	0.475374
gene1178	8.69419	8.24613	7.92611	9.37614	8.22735
gene11780	32.4977	33.1969	47.356	16.6777	63.0693
gene11781	44.591	37.882	52.15	20.5698	59.5839
gene11782	1.4686	1.78541	3.66253	1.63458	1.08045
gene11783	0.707659	2.94967	1.83271	1.41775	1.75712
gene11784	72.1127	27.6441	82.7888	15.9694	84.3222
gene11785	3.16972	1.36676	7.21133	0.729924	4.94539
gene11786	11.4462	5.76716	61.3865	0.839992	22.8089
gene11787	8.54471	1.76317	21.5518	1.24295	6.75194
gene11788	7.59065	1.39074	26.2419	0.334228	7.57769
gene11789	6.11701	0	5.12062	2.22819	9.20516
gene1179	9.22052	8.27145	4.01452	6.47884	5.53008
gene11790	42.6977	46.9039	32.1115	36.4434	37.6203
gene11791	29.1684	22.5577	10.4635	19.3917	14.1458
gene11792	25.106	21.184	14.0653	21.9591	13.7303
gene11793	17.2728	24.9511	27.6657	21.7272	26.7264
gene11794	0.63522	0.0677882	0.440456	0.822861	0.0464518
gene11795	0.0231418	0.219226	0.201794	0.171403	0.102927
[truncated: 6,302 more rows]
