# Supplementary material for: Engineered Antiviral Sensor Targets Infected Mosquitoes
Source: bioRxiv preprint, doi:10.1101/2023.01.27.525922, version 1 (2023-01-27)
Supplement: Table S4 [file 525922_file06.xlsx]

## Sheet: Sheet1
NCBI_ID	341_UbCasRx-NLS-eggs_Replica1	341_UbCasRx-NLS-eggs_Replica2	341_UbCasRx-NLS-eggs_Replica3	371_U6:sgRNAarray_eggs-Replica1	371_U6:sgRNAarray_eggs-Replica2	371_U6:sgRNAarray_eggs-Replica3	Transhet_eggs_Replica1	Transhet_eggs_Replica2	Transhet_eggs_Replica3	Transhet_larvae_replica1	Transhet_larvae_replica2	Transhet_larvae_replica3	341_Ub: CasRx-NLS_Larvae-replica1	341_Ub: CasRx-NLS_Larvae-replica2	341_Ub: CasRx-NLS_Larvae-replica3	AAEL_ID	gene_description	gene_name	gene_synomym	GO_ID	GO_name
LOC5568414	557.9	530.4	478.3	685.5	361	561	40.2	41.5	34.9	128	117	149	78.3	285.8	158.6	AAEL006830	yellow protein precursor [Source:VB Community Annotation]			GO:0042438,GO:0060179	melanin biosynthetic process,male mating behavior
casRx	194.8	182.2	198.5	199.2	19.1	49.5	0.1	0	0.1	0.1	0.1	0.1	0.3	0.7	0.2	construct
EGFP	6.5	0	1	0.7	0.8	7.5	0	0.3	0.1	0.3	0	0.5	4.7	1.4	19.8	construct
LOC110673976	39.6	31.5	33.9	17.8	12.2	8.3	23.8	27.5	30.1	0.7	0.8	6.3	3.1	2.6	1.8	AAEL019902				GO:0030246	carbohydrate binding
LOC110673977	2.1	2.7	3.3	3.2	4.3	2.1	4.1	4.6	4.3	1	1.7	1.4	2.1	1.9	2.7	AAEL005449	protein kinase c alpha binding protein [Source:VB Community Annotation]			GO:0003779,GO:0005515,GO:0005737,GO:0005856,GO:0016020,GO:0019904,GO:0043005,GO:0048471	actin binding,protein binding,cytoplasm,cytoskeleton,membrane,protein domain specific binding,neuron projection,perinuclear region of cytoplasm
LOC110673978	2.1	3.2	3.1	3.3	6.4	6.5	1.5	1.3	2	0.1	0.3	0.2	2	0.4	7.7	AAEL019718				GO:0004129,GO:0005739,GO:0005743,GO:0005746,GO:0009055,GO:0016020,GO:0016021,GO:0022900,GO:1902600	cytochrome-c oxidase activity,mitochondrion,mitochondrial inner membrane,mitochondrial respirasome,electron transfer activity,membrane,integral component of membrane,electron transport chain,proton transmembrane transport
LOC110673979	55.9	52.9	46.4	27.3	32.2	23.4	49.8	45.4	48.3	7.8	7.9	7.5	27	25	20.2	AAEL001085				GO:0005623,GO:0015035,GO:0045041,GO:0055114	obsolete cell,protein disulfide oxidoreductase activity,protein import into mitochondrial intermembrane space,oxidation-reduction process
LOC110673980	0.4	0.2	0.4	0.8	1.8	1	0.5	0.5	0.7	10	12	3.9	24.6	31.1	19.1	AAEL010764	aldehyde dehydrogenase [Source:VB Community Annotation]			GO:0003824,GO:0005737,GO:0006730,GO:0009058,GO:0009258,GO:0016155,GO:0016491,GO:0016620,GO:0016742,GO:0055114	catalytic activity,cytoplasm,one-carbon metabolic process,biosynthetic process,10-formyltetrahydrofolate catabolic process,formyltetrahydrofolate dehydrogenase activity,oxidoreductase activity,oxidoreductase activity, acting on the aldehyde or oxo group of donors, NAD or NADP as acceptor,hydroxymethyl-, formyl- and related transferase activity,oxidation-reduction process
LOC110673981	22	16.3	20	19.2	19.2	16.9	12.1	12.7	12.1	20.5	14.5	20.4	32.4	25.3	27	AAEL010650	sodium/solute symporter [Source:VB Community Annotation]			GO:0016020,GO:0016021,GO:0022857,GO:0055085	membrane,integral component of membrane,transmembrane transporter activity,transmembrane transport
LOC110673982	28.8	31.5	25	8.3	16	10.5	13	13.4	13.9	9.9	9.9	11.3	12.2	12.7	10.5	AAEL025907				GO:0003824,GO:0004721,GO:0004722,GO:0006470,GO:0016787,GO:0016791,GO:0043169,GO:0046872	catalytic activity,phosphoprotein phosphatase activity,protein serine/threonine phosphatase activity,protein dephosphorylation,hydrolase activity,phosphatase activity,cation binding,metal ion binding
LOC110673983	104.4	93.4	94.2	53.2	56.1	48.2	55.7	50.2	58	8.4	5.3	6.9	20.2	21.5	25.6	AAEL003281	ADP-ribosylation factor, arf [Source:VB Community Annotation]			GO:0000166,GO:0005525	nucleotide binding,GTP binding
LOC110673984	26.5	24	26.3	19.6	18.3	17.9	15	14.5	12.9	11.3	13.6	10.3	24.6	17.2	29.1	AAEL003188	sphingosine phosphate lyase [Source:VB Community Annotation]			GO:0003824,GO:0016829,GO:0016831,GO:0019752,GO:0030170	catalytic activity,lyase activity,carboxy-lyase activity,carboxylic acid metabolic process,pyridoxal phosphate binding
LOC110673985	4.7	12.8	3.7	2.6	3.5	1.4	1.8	1.7	1.5	2.2	1.5	1.9	13.3	9.9	9.1	AAEL001289	permease, putative [Source:VB Community Annotation]			GO:0016020,GO:0016021,GO:0022857,GO:0055085	membrane,integral component of membrane,transmembrane transporter activity,transmembrane transport
LOC110673986	0	0	0	0	0	0	0	0	0	0	0	0	0	0	0	AAEL022439	Odorant receptor [Source:UniProtKB/TrEMBL;Acc:J9HFZ2]
LOC110673987	1.3	1	1.2	4.3	7.3	3.9	11.9	12.1	12.7	3.3	3.8	3.9	16.6	9.5	11.8	AAEL027089	Endoplasmic reticulum resident protein 29 [Source:UniProtKB/TrEMBL;Acc:Q16HE7]
LOC110673988	0.1	0.5	0.3	0.1	0.5	0	0.1	0	0.3	1.7	2.8	1.2	4.8	3.5	1.9	AAEL022454
LOC110673989	0.1	0	0.3	0.6	0.9	0.7	0.7	1.1	1.3	11.9	13.2	5.1	47.7	43.8	27.4	AAEL025921
LOC110673990	21.1	22.9	25.4	23.6	23	24.2	21.8	22.8	22.1	13.1	12	11.9	10.9	9.9	8.9	AAEL025712
LOC110673991	41.8	45.5	45.7	28.6	32.4	23.2	51.8	55.1	53.9	22	20.3	18.2	22.6	21.6	23.3	AAEL002938	skd/vacuolar sorting [Source:VB Community Annotation]
LOC110673992	25.4	25.1	25.1	27.7	23.4	24.7	23.1	22.5	22	3.3	3.5	3.5	5	4.1	4.9	AAEL011904	zinc finger protein [Source:VB Community Annotation]			GO:0003676	nucleic acid binding
LOC110673993	45.5	49.9	53	45.6	33.2	39.9	31.9	35.1	31.1	33.3	31.4	36.8	36.8	48.1	38.9	AAEL026310				GO:0005515	protein binding
LOC110673994	0	0.7	0.3	0.4	0.2	0.2	0.2	0.5	0.3	2.6	1.8	2.7	3.5	4.2	2	AAEL005252	corazonin [Source:VB Community Annotation]	Crz		GO:0005184,GO:0005576,GO:0007218,GO:0045823,GO:0071858	neuropeptide hormone activity,extracellular region,neuropeptide signaling pathway,positive regulation of heart contraction,corazonin receptor binding
LOC110673995	5.8	6.9	5.6	5.3	8.2	5.4	7.9	9.8	8.9	1.2	3.4	0.9	1.3	1.3	1.7	AAEL025468
LOC110673996	441.9	417.2	481.4	345.8	279.8	374.4	177.2	184.8	155.6	6.7	8	7.2	30.5	20.2	34.3	AAEL022067
LOC110673997	2.8	2.3	1.9	2.6	7.3	2.1	10.8	10.3	11.7	66.3	51.6	50	64.4	62	67	AAEL024696
LOC110673998	0	0	0	0.1	0.1	0	0	0	0.1	2.9	3.2	2.3	3.1	2.9	1.6	AAEL006293				GO:0005267,GO:0006811,GO:0016020,GO:0016021,GO:0071805	potassium channel activity,ion transport,membrane,integral component of membrane,potassium ion transmembrane transport
LOC110673999	11	9.8	10.6	6.7	7.4	7.6	7.9	9.1	7.5	5.5	5.8	6.1	9.4	12.4	8.9	AAEL006993	synapse-associated protein [Source:VB Community Annotation]
LOC110674000	15.3	20	13.4	9.5	9.5	8.8	24.2	24.7	26.3	0.6	0.7	0.5	2.5	2.4	2.5	AAEL025565
LOC110674001	0.2	0	0	0.1	1.2	0.3	0.1	0	0	0.2	0.6	0.5	1.2	0.8	1.2	AAEL007814	n-twist [Source:VB Community Annotation]			GO:0046983	protein dimerization activity
LOC110674002	21.7	21.8	19.5	6.5	14.3	13.4	11.1	10	11.7	4.4	4.3	3.1	10.9	10.5	14.3	AAEL024681				GO:0003824	catalytic activity
LOC110674003	26.9	25.9	26	14.2	14.7	11.8	19.3	19.2	19.5	3.7	3.5	4.5	9.7	10.9	6.6	AAEL007884	conserved membrane protein at 44E, putative [Source:VB Community Annotation]			GO:0072659	protein localization to plasma membrane
LOC110674004	3.4	3.1	2.5	3.3	4.4	3.9	9	8.5	9.1	0.7	0.5	0.5	2.7	1.9	2.7	AAEL009701				GO:0000077,GO:0005634,GO:0042025	DNA damage checkpoint,nucleus,host cell nucleus
LOC110674005	4.2	10.7	7.8	2.2	2.5	2.1	6.8	8	6.4	1.5	1.9	1.7	4.9	5.5	5.3	AAEL014355	symbol, putative [Source:VB Community Annotation]			GO:0016020,GO:0016021	membrane,integral component of membrane
LOC110674006	0.3	0.3	0.3	0	0	0.1	0.1	0.2	0	0	0	0.1	0	0.1	0.1	AAEL026025
LOC110674007	0.1	0.1	0.2	0.1	0.4	0.2	0.2	0.5	0.3	10.7	8.9	14.2	47.7	34.7	29.2	AAEL007669	oxidoreductase [Source:VB Community Annotation]			GO:0055114	oxidation-reduction process
LOC110674008	0	0.2	0.1	0.1	0.2	0	0.1	0.1	0.1	1.9	2.7	2	2.7	3	3
LOC110674009	0	0	0	0.1	0.2	0	0	0	0	0.1	0.2	0.1	0.1	0.1	0.1	AAEL018183				GO:0005515,GO:0005737,GO:0008270,GO:0046872	protein binding,cytoplasm,zinc ion binding,metal ion binding
LOC110674010	2.1	2.4	2.1	6.8	9	7.3	2.6	2.7	2.7	56.9	28.1	33.9	81.8	63.3	55.4	AAEL019650
LOC110674011	1.4	1.5	1.5	1.4	0.8	0.6	0.2	0.2	0.1	0.4	0.3	0.3	1	2.3	1	AAEL020016
LOC110674012	2.2	2.2	2.3	0.8	4.3	3.3	0.4	0.4	0.5	0	0	0	0.1	0	0	AAEL024896
LOC110674013	20.2	19.2	24.8	17.4	9.7	7.5	3.1	4.1	3.2	22.4	22	23.3	48.2	53	31.8	AAEL021035				GO:0005789,GO:0016020,GO:0030314	endoplasmic reticulum membrane,membrane,junctional membrane complex
LOC110674014	14.6	15.4	16.3	5.9	6.2	4.9	2.7	3	2.5	2	1.9	1.5	4.7	5.2	5	AAEL023474
LOC110674015	8.9	10.8	8.7	2.6	4.9	3.2	23.9	21.9	23.2	2	1.6	1.1	2.6	2.1	3	AAEL028201				GO:0007093,GO:1990423	mitotic cell cycle checkpoint,RZZ complex
LOC110674016	0.3	0.2	0.2	0.8	2.5	0.9	1	1.6	1.3	10.6	12.6	10.1	20.6	19.8	17.1	AAEL022632
LOC110674017	13.7	12.7	14.8	11.6	10.8	11.4	18	14.3	14.8	5.9	5.3	7.4	7.1	6.4	9.8	AAEL027018				GO:0003865,GO:0005783,GO:0005789,GO:0006486,GO:0006488,GO:0006629,GO:0016020,GO:0016021,GO:0016095,GO:0016491,GO:0016627,GO:0019348,GO:0055114,GO:0102389	3-oxo-5-alpha-steroid 4-dehydrogenase activity,endoplasmic reticulum,endoplasmic reticulum membrane,protein glycosylation,dolichol-linked oligosaccharide biosynthetic process,lipid metabolic process,membrane,integral component of membrane,polyprenol catabolic process,oxidoreductase activity,oxidoreductase activity, acting on the CH-CH group of donors,dolichol metabolic process,oxidation-reduction…
LOC110674018	892.1	867.5	833.5	1294.7	1221.9	1141.7	1181.3	1133	1233	1670.8	1825.8	1830.6	1383	1275.5	1307.9	AAEL021422	60S ribosomal protein L18a [Source:UniProtKB/TrEMBL;Acc:Q174U3]			GO:0003735,GO:0005840,GO:0006412	structural constituent of ribosome,ribosome,translation
LOC110674019	1	1.3	0.8	0.9	1.8	0.9	5.6	5.8	5.8	0.2	0.4	0.3	0.6	0.9	0.5	AAEL025777
LOC110674020	40	43.9	55.2	47.5	40.7	33	73	83.4	73	9.7	11.7	11.2	22.7	23	29.9	AAEL022573				GO:0003676	nucleic acid binding
LOC110674021	5.7	9.2	6.7	5.4	2.1	5.7	2.9	2.6	2.1	0.6	0.1	0.6	0	0.3	1.1	AAEL027403
LOC110674022	0.1	0.3	0.2	0	0.1	0	0.2	0.2	0.2	0.6	0.2	0.3	0.8	0.7	0.5	AAEL024811
LOC110674023	0	0	0	0	0	0	0.1	0	0.5	1.4	2.3	2.1	1.4	1	1	AAEL020337
LOC110674024	0	0	0	0	0	0.2	0	0.1	0	0	0.2	0	0	0.3	0	AAEL025948
LOC110674025	1.1	0.7	1.4	2.4	4	1.6	22.9	26.3	22.3	1.2	1.5	1.3	2.4	3	3.6	AAEL021538
LOC110674026	0	0	0	0.1	0.1	0	0	0	0	0.7	1	1	2.1	5	3.3	AAEL027106
LOC110674027	0	0	0	0	0	0	0	0	0	2.4	1.6	0.2	4.3	5.6	5.3	AAEL022762
LOC110674028	0.2	0.1	0.2	0.1	0	0.1	0.3	0.1	0.1	8.9	4.2	4.8	14.6	11	18.9	AAEL026232
LOC110674029	0.1	0	0.1	0	0	0	0	0.1	0	0	0	0	0	0.1	0	AAEL024889
LOC110674030	0.3	0.4	1.3	0.2	0.4	0.2	0.8	0.8	0.5	12.1	9.9	7.8	10.6	6.3	22.2	AAEL021440
LOC110674031	0	0	0.1	0	0.1	0	0	0.1	0	0	0.1	0	0.1	0.1	0.1	AAEL025031
LOC110674032	0.7	1	0.5	1.6	1.4	0.3	0	0	0.9	0.2	0	1	0.2	0.1	0.2	AAEL020285
LOC110674033	0	0	0	0	0	0.2	0	0	0	0	0	0	0	0	0	AAEL022097
LOC110674034	16.1	42.4	24.9	15.2	21.2	12	127.1	136.9	123.9	12	14	13.1	34.9	38.2	38.7	AAEL025611
LOC110674035	0	0	0	0	0	0	0	0.1	0	0	0	0	0	0	0	AAEL020857
LOC110674036	0	0	0.1	0	0.1	0	0	0	0	0.1	0	0	0	0	0	AAEL024481
LOC110674037	1.4	1.5	1.5	2.6	2.3	2.6	0.7	0.9	0.6	3	2.4	2.7	3.2	2.6	2.4	AAEL013737	axonemal inner arm dynein light chain [Source:VB Community Annotation]
LOC110674038	3.2	2.6	3.3	2.8	3	2.2	6.6	8	7	2.2	2.2	2.2	5	5.6	6.6	AAEL023845				GO:0005509,GO:0005886,GO:0007155,GO:0007156,GO:0016020	calcium ion binding,plasma membrane,cell adhesion,homophilic cell adhesion via plasma membrane adhesion molecules,membrane
LOC110674039	0.4	0.2	1.3	0.3	0.3	1.1	0.1	0.2	0.1	0.1	0	0	0	0	0	AAEL027303
LOC110674040	6	1.9	4.3	2.4	6	9.4	2.8	3.3	2.7	0	0.4	0	0	0.7	0.4	AAEL025546
LOC110674042	0.2	0.1	0.2	0.4	0.3	0.2	0.7	0.5	0.6	0.2	0.1	0.3	0.3	0.5	0.2	AAEL026296
LOC110674043	1.1	1.3	1.1	0.6	1.1	0.7	1.1	1	1	0.1	0.1	0.1	0.1	0	0	AAEL022458
LOC110674044	0.7	1.2	0.9	0.1	1.1	0.7	0.4	0.5	0.2	0	0	0	0	0	0	AAEL022099				GO:0003676	nucleic acid binding
LOC110674045	0	0	0.1	0.1	0.1	0	1.5	1.3	1.5	0.1	0.6	0.1	0	0	0.2	AAEL025186
LOC110674046	0.1	0.1	0.1	0.4	0.4	0	0.4	0.5	0.4	0.1	0.1	0.1	0.2	0.1	0.2	AAEL020469
LOC110674047	0.4	0.1	0.3	0.1	0.1	0	0.2	0.3	0.1	0.1	0	0.1	0	0.1	0	AAEL027877
LOC110674048	0	0	0	0.1	0.3	0	0.5	0.5	0.5	0.1	0.6	0.2	0	0	0	AAEL023189
LOC110674049	75.7	57.3	75.3	71.3	69.4	76.1	66.6	66.9	71.8	28.6	22.3	26.4	37.8	28.9	36.6	AAEL027326
LOC110674050	0.3	0.7	0.7	0.1	0.1	0	0.7	0.4	0.4	0	0.1	0.1	0.3	0.1	0.7	AAEL020988
LOC110674051	0.2	0.1	0.1	0.3	0.7	0.8	0.3	0.2	0.5	0	0	0.1	0	0	0.1	AAEL023727
LOC110674052	0.6	2.5	1.9	0	0	0	0	0.2	0.2	0	0	0	0	0	0	AAEL027283
LOC110674053	0.1	0	0.1	0	0.2	0	0.1	0	0.2	0	0	0	0	0	0	AAEL023823
LOC110674054	0.1	0	0	0.1	0.1	0.1	0.1	0.3	0.1	5	3.8	4	16.4	10.7	32.7	AAEL027261				GO:0005576,GO:0008061	extracellular region,chitin binding
LOC110674056	28.7	30.7	27.1	7.7	24.5	17.4	2.6	2.3	2.1	0.3	0.1	0.6	0.6	0.5	0.1	AAEL026343				GO:0000166,GO:0003676,GO:0003779,GO:0003824,GO:0004386,GO:0005524,GO:0006310,GO:0044237	nucleotide binding,nucleic acid binding,actin binding,catalytic activity,helicase activity,ATP binding,DNA recombination,cellular metabolic process
LOC110674057	0.9	1.2	1.1	0.4	1.7	0.4	6.2	8.1	7.1	0.3	0.3	0.3	0.6	0.8	0.8	AAEL021924
LOC110674058	0	0	0.2	0.1	0	0	0.1	0	0	1.1	0.6	0.8	0.2	0.3	0.3	AAEL025444
LOC110674059	0.4	0.1	0.1	0.1	0.2	0.1	0	0	0	0	0	0	0	0.1	0	AAEL020882
LOC110674060	0.1	0.2	0.5	1.2	1.5	1.8	1.4	1.2	1.8	0.2	0.1	0.1	0.1	0.1	0.2	AAEL022292
LOC110674061	1.4	1.5	1.4	0.2	0	0.1	0.3	0.2	0.3	0	0.1	0	0	0.2	0.2	AAEL022791
LOC110674062	1.5	1.5	1.4	0.3	0	0.1	0.4	0.1	0.3	0	0.1	0	0	0.1	0.2	AAEL026397
LOC110674063	2.9	2.9	2.9	4.7	0.8	0.7	0.6	0.4	0.3	0.9	0.8	0.6	1.7	1	2.7	AAEL023680				GO:0003676	nucleic acid binding
LOC110674064	5.8	6.5	7.5	5.3	4.9	4.1	3.2	3.7	3.1	0.7	0.5	0.6	0.8	0.8	1	AAEL027245				GO:0003677,GO:0005524,GO:0006281,GO:0008094	DNA binding,ATP binding,DNA repair,DNA-dependent ATPase activity
LOC110674065	0	0	0	0	0	0	0.6	0.8	0.4	0	0.5	0.1	1.2	1.5	2.4	AAEL020967
LOC110674066	0	0.3	0.2	0.2	0	0	0.2	0.2	0.2	0.1	0	0.2	0.4	0	0	AAEL024630				GO:0005179,GO:0005184,GO:0005576,GO:0007218,GO:0032539	hormone activity,neuropeptide hormone activity,extracellular region,neuropeptide signaling pathway,negative regulation of host-seeking behavior
LOC110674067	56.6	58.6	65.7	51.9	35.6	51.6	29.1	29.8	30.6	2.7	2.6	2.6	5.1	4.4	4.8	AAEL021868				GO:0003676,GO:0005634,GO:0008270	nucleic acid binding,nucleus,zinc ion binding
LOC110674068	0.2	0	0.3	0.3	0.1	0.2	0.4	0.5	0.2	0.3	0.1	0.1	0.1	0.1	0.1	AAEL025554
LOC110674069	0.6	0.2	0.6	3	4.6	2.1	2.3	3.9	3.7	0.6	0.4	0.1	0.8	0.7	0.5	AAEL026226
LOC110674070	0	0	0.1	0	0	0	0	0	0	0	0	0.1	0.1	0.2	0	AAEL025824
LOC110674071	0	0.4	0	0.1	0.1	0	0.6	0.1	0.2	0.3	0.1	0.2	0	0.2	0.2	AAEL020100
LOC110674072	0.2	0.3	0.4	0.1	0.6	1.1	0.3	0.3	0.2	0.1	0	0	0.1	0	0	AAEL024682				GO:0003676	nucleic acid binding
LOC110674073	17.9	18.2	16.9	11.8	9.8	10.1	8.6	9.8	9.4	1.4	1.5	1	2.8	2.2	3.2	AAEL021869				GO:0016020,GO:0016021	membrane,integral component of membrane
LOC110674074	2.7	2.9	3	0.2	0.6	1.1	0.4	0.6	0.5	0.1	0.4	0.1	0.1	0.3	0.3	AAEL024414
LOC110674075	0.1	0.6	0.6	0.4	0.2	0.1	0.2	0.4	0.6	1.1	0.5	0.5	1.3	0.8	1.2	AAEL020684
LOC110674076	0.1	0.1	0	0.1	0.3	0.2	0.1	0.2	0.1	0.1	0.1	0.1	0.2	0.1	0	AAEL023319
LOC110674077	0.3	0.6	0.4	0.2	0.3	0.1	1.2	1.4	1.1	0	0	0	0.1	0.2	0.1	AAEL027665
LOC110674078	0.3	0	0	0	0	0	0	0	0	0.5	0.9	0.5	0.7	0.7	1	AAEL024181
LOC110674079	0	0	0	0.5	0.4	0.7	0.6	0.6	0.6	0	0	0	0	0	0	AAEL026464
LOC110674080	3.7	3.4	2.6	0.1	0.6	2.8	0.6	0.6	0.7	0.1	0	0.1	0	0.1	0	AAEL023254
LOC110674081	0	0.1	0	0	0	0.1	0	0.1	0.2	0	0	0	0	0	0	AAEL025093
LOC110674082	0.8	4.6	1	0.6	0.7	0.8	1	0.7	0.5	0	0	0	0.4	0	0	AAEL023377
LOC110674083	0	0.1	0.5	0.1	0.2	0	0.3	0.9	0.4	0.1	0.4	0.8	0.4	0	1	AAEL027744
LOC110674084	0.1	0	0	0	0	0	0	0	0	0.2	0.2	0.2	0.3	0.5	0.4	AAEL022176
LOC110674085	0.1	0.1	0	0.1	0	0.1	0.2	0.2	0	0.3	0.6	0.5	0.1	0.3	0.3	AAEL021443
LOC110674086	0.1	0.1	0.3	0.1	0.3	0	0.1	0.1	0	0.2	0.3	0.7	2.3	12.9	10	AAEL026128
LOC110674087	0.9	0.4	0.2	0	0	0.9	0	0.2	0.1	0.3	0.6	0.8	0.9	0.4	1	AAEL019991
LOC110674088	1.9	2.7	2.3	1.9	1.6	1	1.6	2.2	1.6	0	0.5	0	0.5	0.9	1.1	AAEL025032
LOC110674089	0	0	0	0	0	0	0.3	0	0	0	0	0	0	0	0	AAEL020531
LOC110674090	0.1	0.2	0.4	0.1	0.5	0.2	0.2	0.1	0	0.1	0.1	0	0.1	0.1	0.1	AAEL027785
LOC110674091	6.1	5.3	7.6	4.8	2.8	4	0.1	0.9	0.6	0	0	0	0.2	0	0.1	AAEL025490
LOC110674092	0	0	0	0	0	0	0.1	0	0	0	0	0	0	0	0	AAEL020931
LOC110674093	0	0	0.1	0	0	0	0	0.1	0.1	0	0	0	0.1	0.1	0	AAEL026385				GO:0006508,GO:0008234	proteolysis,cysteine-type peptidase activity
LOC110674094	0	0	0	0	0	0	0	0	0	0	0	0	0	0	0	AAEL021320
LOC110674096	0.1	0.1	0.2	0.1	1.7	0.4	0	0.1	0	0.3	0.9	0.4	0.4	2.2	0.7	AAEL022804
LOC110674097	0	0.1	0	0	0.2	0.1	0	0.1	0	0.1	0.3	0.1	0.5	1	1.3	AAEL027763				GO:0004462,GO:0016829,GO:0046872	lactoylglutathione lyase activity,lyase activity,metal ion binding
LOC110674098	0	0.3	0.6	7.8	126	17.7	0.2	0	0.1	1.6	1.8	1.8	4.9	5.3	7.4	AAEL023292
LOC110674099	0.5	0.5	0.6	0.3	0.9	0.5	1.6	1.7	1.5	0.4	0.2	0.2	0.7	0.8	0.8	AAEL020961
LOC110674100	0.5	0.5	0.6	0.3	0.9	0.5	1.7	1.7	1.5	0.4	0.2	0.2	0.7	0.8	0.8	AAEL022576
LOC110674101	0.5	0.5	0.5	0.2	0.7	0.3	0.8	0.6	0.5	0	0.2	0.1	0.3	0.5	0.4	AAEL028076
LOC110674102	1.1	3.1	2.4	1.5	1.5	1.6	2.9	3.2	2.6	0.3	0.4	0.4	1	1	0.9	AAEL023447
LOC110674103	0.2	0.5	0.6	0.2	0.2	0.2	0.3	0.3	0.3	0.4	0.5	0.2	0.9	0.9	2.1	AAEL020072
LOC110674104	0.3	0.4	0.6	0.1	0.3	0.3	0	0.2	0.4	0	0	0	0	0	0	AAEL027889
LOC110674105	2.4	4.9	5	1	0.9	2.2	1.9	2.8	1.8	0	0	0.1	1	0.8	1.8	AAEL021292
LOC110674106	0	0.3	0.5	0.7	0.5	0.7	0.2	0.7	0.6	0.1	0	0	0	0.2	0.6	AAEL024738
LOC110674107	1.2	1.4	1.4	0.5	0.6	1.4	1.1	2.3	1.5	0	0.2	0.3	0.2	0	0.1	AAEL022476
LOC110674108	0.5	0.7	0.6	1	1.7	1.4	0.9	2.2	1.4	0.1	0.2	0.2	0.2	0.2	0.1	AAEL021305
LOC110674109	0.8	0.6	0.5	0	0	0.1	0.1	0.1	0	0	0.1	0	0	0	0	AAEL023626				GO:0004984,GO:0005549,GO:0007608,GO:0016020	olfactory receptor activity,odorant binding,sensory perception of smell,membrane
LOC110674110	1.3	1	0.8	0.2	0.1	0.2	0.9	0.1	0.3	0	0	0	0	0	0	AAEL027292
LOC110674111	0	0	0	0	0	0	0	0	0	0	0	0	0	0	0	AAEL018080				GO:0004984,GO:0005549,GO:0007608,GO:0016020	olfactory receptor activity,odorant binding,sensory perception of smell,membrane
LOC110674112	0.1	0	0	0.1	0.2	0.4	0	0	0	0	0	0	0	0	0	AAEL026419
LOC110674113	20	53.9	32.2	10.2	9.9	5.6	46.6	43.7	49.3	0	0.2	0.2	0.2	0.3	0.3	AAEL025310
LOC110674114	3.1	5.1	4.5	0.5	1.5	0.6	0.8	1.7	1.2	0.2	0.3	0.2	0.6	0.9	0.4	AAEL021779
LOC110674115	38.6	111.1	67.5	18.9	20.9	11.6	102.4	94.3	101	0.1	0.3	0.4	0.6	0.6	0.6	AAEL024316
LOC110674116	0	0	0.1	0	0	0	0.3	0.4	0.2	2.5	2.7	2.5	3.3	4.4	2.5	AAEL020380
LOC110674117	3.9	8.8	8.1	8.7	15.2	11.9	8.1	13.4	13.8	10.3	19.6	11.9	33.2	15.4	50.5	AAEL027598
LOC110674118	66.4	55.3	52.9	29.3	19.2	27.4	14.2	18.8	15.6	0.9	0.9	0.5	1.2	1	1.3	AAEL024176
LOC110674119	0	0	0	0.1	0.2	0.2	0	0.3	0.3	26.2	33.7	28.5	95.1	77.6	62.5	AAEL026582				GO:0005506,GO:0016705,GO:0020037,GO:0055114	iron ion binding,oxidoreductase activity, acting on paired donors, with incorporation or reduction of molecular oxygen,heme binding,oxidation-reduction process
LOC110674120	45	164.6	62.9	0.2	0.5	0.2	43.7	56.6	32.7	4.5	4.1	7.1	2.7	3.4	2.3	AAEL024267
LOC110674121	3.2	2.8	2.8	0	0.5	0	0.4	0.5	0.8	0	0	0	0	0	0	AAEL024095
LOC110674122	1314.3	1177.8	1110.5	239.2	265.5	230.4	44.3	46	35.1	7.3	7.6	9.9	13.1	9.5	8	AAEL027536	Putative alpha amylase catalytic domain family found in maltase [Source:UniProtKB/TrEMBL;Acc:A0A0P6IY06]			GO:0016020,GO:0016021	membrane,integral component of membrane
LOC110674123	0.2	0.8	1.3	0.5	0.5	0.1	0.6	0.4	0.3	0.1	0.2	0.1	0.6	0.3	1.5	AAEL026429
LOC110674124	0.1	0.1	0.1	0	0	0	0.1	0.1	0	0.1	0.2	0.1	0	0	0	AAEL024026
LOC110674125	1.1	1.1	1.4	0.9	1.1	0.6	2.5	2.6	2.9	0.1	0.3	0.1	0.3	0.1	0.3	AAEL021715				GO:0003676	nucleic acid binding
LOC110674126	9.1	15.4	14.8	1.1	1	1.9	0.2	0.2	0.2	1	0.9	0.7	0.8	1	0.8	AAEL025386
LOC110674127	0	0.1	0	0	0	0	0	0	0	0.1	0.4	0.1	0.9	0.5	0.6	AAEL024231				GO:0005515	protein binding
LOC110674128	27.7	71.8	43.1	11.6	11.4	5.9	51	48.7	53	0.1	0.1	0.2	0.3	0.2	0.3	AAEL021820
LOC110674129	26.3	66.8	38.7	10.3	10.4	5.2	44.6	42.6	46.4	0.1	0.1	0.1	0.3	0.2	0.2	AAEL027387
LOC110674130	0	0.5	0.1	0.1	0.1	0.2	1	1.4	1.1	0.2	0	0.2	0.2	0	0.1	AAEL026136
LOC110674131	0.3	1.5	0.1	0.1	0	0.2	0.1	0.1	0.1	0.1	0.1	0.1	2.8	1.2	1.8	AAEL021310				GO:0005515	protein binding
LOC110674132	0	0	0	0	0	0	0	0	0	0.4	1	0.3	0.8	0.6	0.6	AAEL024749				GO:0005515	protein binding
LOC110674133	3.1	1.5	2.5	1.3	2.1	1.6	1.3	0.8	0.5	0.4	0.9	1.4	14.9	77.4	60.6	AAEL020011				GO:0042302	structural constituent of cuticle
LOC110674134	0.2	0.1	0.2	0.3	0.2	0.2	0.4	0.4	0.4	0.1	0	0.1	0.1	0.1	0	AAEL023884				GO:0003777,GO:0005524,GO:0007018,GO:0030286	microtubule motor activity,ATP binding,microtubule-based movement,dynein complex
LOC110674135	0	0	0	0	0	0	0	0.1	0	0.1	0.1	0	0.5	0.5	0.3	AAEL027187
LOC110674136	0	0	0	0	0	0	0	0	0	0	0	0	0	0	0	AAEL022482
LOC110674137	0	0	0	0	0	0	0	0	0	0	0	0	0	0	0	AAEL023061
LOC110674138	0	0	0	0	0	0	0	0	0	0	0	0	0	0	0	AAEL026625
LOC110674139	0.1	0.1	0.1	1.7	0.1	0	0.3	0.3	0.3	0	0	0	0	0	0	AAEL025745
LOC110674140	0.1	0.1	0.1	0.1	0.1	0.1	0.1	0	0	0	0	0	0	0	0	AAEL022317				GO:0003676,GO:0003677	nucleic acid binding,DNA binding
LOC110674141	0.1	0.1	0.1	0.1	0.1	0.1	0.1	0	0	0	0	0	0	0	0	AAEL026643				GO:0003676,GO:0003677	nucleic acid binding,DNA binding
LOC110674142	4.1	4.1	3.5	1.5	2.2	1.6	18.7	17.7	18.1	4.9	5.1	4.2	13.8	15.3	15.9	AAEL021882
LOC110674143	0	0	0	0	0.3	0.1	0	0	0	0	0	0	0.1	0	0	AAEL020899				GO:0003676,GO:0003677	nucleic acid binding,DNA binding
LOC110674144	0	0	0	0.2	0.4	0.6	0	0	0.2	0	0	0	0	0	0	AAEL024473
LOC110674146	42.6	40.5	39.1	32.3	44	42.6	31.7	35.1	28.4	3	3	2.5	5	4.5	3.8	AAEL023247				GO:0003676,GO:0005634,GO:0008270	nucleic acid binding,nucleus,zinc ion binding
LOC110674147	0.3	0.7	0.5	0.5	0.3	0.3	8.3	9.3	9	1.4	1	0.9	1.3	1.8	1.3	AAEL023943				GO:0007165	signal transduction
LOC110674148	2.8	5.4	2.9	3.9	2.9	1.7	13.5	17.6	18.2	0.5	0.8	0.6	3.7	2.7	2.1	AAEL027610				GO:0000166,GO:0005524	nucleotide binding,ATP binding
LOC110674150	1.2	4.4	1.7	1.8	1.5	1	12.2	15.2	14.1	1.3	1.3	1.4	2.6	2.3	1.5	AAEL017975	heat shock protein HSP70 [Source:VB Community Annotation]	HSP70Ba
LOC110674151	2.7	3.2	1.7	3.7	2.5	2	15	21.3	20.3	1.3	1.4	1.3	3.5	2.9	2.4	AAEL017976	heat shock protein HSP70 [Source:VB Community Annotation]	HSP70Bb
LOC110674152	1.2	2.3	1	1.4	1.2	0.9	6.6	8.3	8.4	0.2	0.3	0.3	1	0.6	0.5	AAEL020330				GO:0000166,GO:0005524	nucleotide binding,ATP binding
LOC110674153	0.4	1.2	0.3	0.7	0.8	0.6	0.8	1.2	0.9	6.6	8.6	6.8	0.4	0.7	0.5	AAEL023321				GO:0000166,GO:0005524	nucleotide binding,ATP binding
LOC110674154	3	3.6	3.4	5.3	5.1	4.7	6.2	6.4	6.3	3.5	2.1	2	3.5	3.9	2.7	AAEL026868
LOC110674155	0.7	2.8	1.6	2.2	2.7	2.4	2.3	2.5	1.9	0.1	0.3	0.2	0.1	0.2	0.3	AAEL022344
LOC110674156	0.4	0.6	0.7	0.2	0.4	0.5	0.2	0.5	0.4	0	0	0	0	0.1	0	AAEL021864
LOC110674157	0.2	0.5	0.2	0.1	0	0	0.2	0.2	0.4	0.7	0.5	0.7	0.4	0.5	0.8	AAEL021403
LOC110674158	0.2	0.1	0.2	0.3	0.1	0.1	1.1	1.3	0.6	0.6	0.3	1.1	0.5	0.7	0.5	AAEL025185
LOC110674159	27	24.5	25.7	16.8	16	16.1	4.5	5.1	3.9	2.1	1.5	1.7	1.9	1.1	2.7	AAEL023718				GO:0005515	protein binding
LOC110674160	620	618.7	656.6	499.1	468.2	507.9	804.1	753.3	741.2	59.5	60.6	57.7	168	115.7	165.9	AAEL022282				GO:0003676,GO:0003723,GO:0006355	nucleic acid binding,RNA binding,regulation of transcription, DNA-templated
LOC110674161	0.1	0.2	0	0	0	0	0.1	0.2	0	0.4	0.4	0.5	0.3	0.8	0.6	AAEL026934
LOC110674162	3.2	1.9	3.8	6.7	7.4	5.9	14.8	12.5	13.1	1.2	1.4	1.1	0.9	1	2.5	AAEL023183
LOC110674163	441.3	384.1	370.3	371.3	412.9	355.1	339.8	309.1	364.6	89.6	88.5	87.7	163.5	143.7	151.6	AAEL022901	Huntingtin-interacting protein HYPK (Fragment) [Source:UniProtKB/TrEMBL;Acc:Q1HRA7]
LOC110674164	37	33.6	41.1	31.7	18.7	26.7	52.1	51.3	48.9	11.9	10.6	12.1	30.1	23.8	34.9	AAEL011982	cortactin [Source:VB Community Annotation]			GO:0005515	protein binding
LOC110674165	0.2	0	0.1	0.1	0	0	0.2	0.1	0	2.5	2	1.4	0.8	0.9	0.4	AAEL023821
LOC110674166	312.1	292.7	301.5	258.8	275	306.5	204.5	192.6	198.7	30.8	34.3	38.8	113.1	94	131.7	AAEL020485	Signal peptidase complex catalytic subunit SEC11 [Source:UniProtKB/TrEMBL;Acc:Q1HRM6]			GO:0004252,GO:0005783,GO:0005787,GO:0005789,GO:0006465,GO:0006508,GO:0008233,GO:0008236,GO:0016020,GO:0016021,GO:0016787,GO:0031090	serine-type endopeptidase activity,endoplasmic reticulum,signal peptidase complex,endoplasmic reticulum membrane,signal peptide processing,proteolysis,peptidase activity,serine-type peptidase activity,membrane,integral component of membrane,hydrolase activity,organelle membrane
LOC110674167	0.3	0.7	0.1	0.3	0.6	0.6	1.7	1.2	1.4	0.2	0.1	0.1	0.1	0	0.1	AAEL020786
LOC110674168	1.7	4.6	3	1.5	0.7	1.1	0.4	0.5	0.3	0.4	0.1	0.2	0.5	0.5	0.2	AAEL025632
LOC110674169	0.4	0.6	0.3	0.3	0.2	0.1	0.4	0.4	0.2	0.1	0	0.1	0.5	0.5	0.4	AAEL022246
LOC110674170	3.2	7.7	4.7	1.9	1.2	1.8	0.4	0.6	0.6	0.7	0.2	0.2	0.6	0.9	0.4	AAEL022744
LOC110674171	2	1.4	2.9	4.5	1.8	1.4	6.8	8.6	9.2	5.3	6.2	4.8	2	1.8	1.6	AAEL026980
LOC110674172	0.4	0	0.6	0	0.1	0.1	1.1	0.2	0.3	0	0	0	0	0	0.1	AAEL021561
LOC110674173	1	2.7	1.2	2.4	1.4	2.6	4.3	3.4	4.1	0.2	0	0	0.2	0.2	0	AAEL020325
LOC110674174	92.9	88.4	90.7	55.8	56.9	65	23.3	24.5	18.4	42.8	36.1	36.1	14.9	21.2	12.9	AAEL024982
LOC110674175	18.6	17	20.2	23	29.1	23.5	32.9	29.2	33.4	7.8	9.2	5	6.4	4.7	4.9	AAEL027264				GO:0004497,GO:0005506,GO:0016705,GO:0020037,GO:0055114	monooxygenase activity,iron ion binding,oxidoreductase activity, acting on paired donors, with incorporation or reduction of molecular oxygen,heme binding,oxidation-reduction process
LOC110674176	0.3	0.1	0.5	1.2	1.7	1	1.7	1.7	1.9	0.6	0.5	0.3	0.3	0.2	0.1	AAEL023837
LOC110674177	0.2	0.5	0.3	0.7	1.3	0.2	3.9	5.2	3.7	6.2	5.7	5.3	4.9	3.8	4.4	AAEL019557				GO:0003676	nucleic acid binding
LOC110674178	0.1	0.3	0.4	0.3	0.4	0.9	0.2	0.1	0	0	0.1	0	0	0	0.1	AAEL028179
LOC110674179	0.1	0.1	0.2	0	0	0.1	0.1	0.1	0.1	0	0	0	0	0.1	0	AAEL018094				GO:0016020,GO:0016021	membrane,integral component of membrane
LOC110674180	0	0	0	0	0.4	0	0.3	0	0	0	0	0	0.3	0.3	0	AAEL020982
LOC110674181	1.1	2.6	2.3	2.2	6.5	11.5	5.7	5.2	4.6	6.2	11	6.4	3.8	2	4.8	AAEL024365
LOC110674182	0.1	0.1	0	0	0	0	0.2	0.1	0	0.1	0	0.2	0.2	0.1	0.1	AAEL021692
LOC110674183	0	0	0	0	0	0	0	0	0	0.3	0	0	0	0	0	AAEL022863
LOC110674184	0	0.1	0	0	0.1	0	0	0	0	0	0	0	0	0	0	AAEL026988
LOC110674185	0	0.1	0	0	0.1	0	0	0	0	0	0	0	0	0	0	AAEL023737
LOC110674186	0	0.1	0	0	0.1	0	0	0	0	0	0	0	0	0	0	AAEL027308
LOC110674187	0.1	0.1	0.1	0.1	0.1	0.1	0.1	0	0	0	0	0	0	0	0	AAEL027742				GO:0003676,GO:0003677	nucleic acid binding,DNA binding
LOC110674188	0.2	0.4	0.5	0.2	0.2	0.2	0.3	0.3	0.3	0.4	0.5	0.2	0.9	0.9	2	AAEL023263
LOC110674189	0	0.1	0	0	0	0.1	0.2	0.2	0.2	0.1	0.1	0	0.2	0.3	0.5	AAEL020874
LOC110674190	3.8	4	3.4	1.1	1.3	1.7	0.2	0.3	0.5	6.6	6.2	4.9	2.3	1.5	2.4	AAEL005073
LOC110674191	0	0.3	0	0	0	0	0.2	0	0.2	0.6	0.2	0	0.2	0.4	0	AAEL023722
LOC110674192	51.5	38.7	45.3	37.5	44.5	62.2	25.2	27.1	18.9	4.4	3.3	4.1	3	3	4.1	AAEL019663				GO:0003676	nucleic acid binding
LOC110674193	1.9	1.7	1.2	1.5	2.2	1.3	3.6	2.8	3.2	0.4	0	0.5	0.2	0.2	0.2	AAEL022831
LOC110674194	0.1	0.1	0.1	0.1	0	0.1	0.1	0.2	0.2	0	0	0.1	0	0	0	AAEL026230
LOC110674195	0	0	0	0	0	0	0	0	0	0	0	0	0	0.1	0	AAEL023455
LOC110674196	0.1	0.3	0.2	0.2	0.1	0	0.1	0.2	0.1	0.1	0	0.1	0	0.1	0	AAEL027427
LOC110674197	0	0.1	0.1	0.1	0	0.1	0.1	0.1	0.1	0	0	0	0.1	0.1	0.1	AAEL024626
LOC110674198	0.2	0.8	1	2.3	2.8	1.7	3.2	4.2	3.6	0	0	0.2	0.3	0	0.2	AAEL024046
LOC110674199	0.1	0.6	0.9	0.1	0.3	0	2.8	3.1	2.8	0.7	0.7	0.6	1.4	1.2	1.3	AAEL025256
LOC110674200	0	0	0.1	0	0.1	0.1	0.7	0.8	0.6	0	0	0.1	0.1	0	0	AAEL024158
LOC110674201	0	0	0	0	0.7	0	1.2	0.7	0.8	0.5	0.3	1	0	0	0	AAEL026442
LOC110674202	0.5	0.5	0.3	0.4	2.2	2.4	0.4	0.7	0.1	0.5	0	0	0.4	0.7	0.3	AAEL024599
LOC110674203	0.5	0.6	0.3	0.5	2.4	2.6	0.6	0.8	0.2	0.5	0	0	0.4	0.8	0.2	AAEL021873
LOC110674204	2.3	1	1.7	0	1.7	0.9	0	0.8	1.4	0	0	0	0.7	0	0	AAEL022728
LOC110674205	0.9	0.9	1.1	1.1	3.4	1.6	2.8	2.6	3	6.1	6.8	6.9	8.2	8.3	9.2	AAEL027099
LOC110674206	0.1	0.1	0.1	0.3	0.3	0.5	0.1	0.1	0.2	0.1	0.1	0	0.1	0.1	0.2	AAEL023888				GO:0046983	protein dimerization activity
LOC110674207	0.1	0.3	0.1	0.2	0.1	0.2	0.1	0.1	0.1	0.6	0.3	0.8	2.2	1.5	0.4	AAEL027211
LOC110674208	40.9	29.4	33.4	30.5	30.6	40.1	12.7	10.8	11.8	5.4	4.5	2.3	2.1	2.8	2.8	AAEL004645
LOC110674209	11.3	10.2	14.9	14.3	11.9	12.6	11.5	11.6	8.9	2	2.4	2.2	2.1	1.2	2.7	AAEL024517
LOC110674210	2.8	3.2	5.3	2.6	3.4	3.4	2.9	2	1.7	2.6	0.8	2.4	0	1.3	1.3	AAEL026521
LOC110674211	1.1	0.6	1.3	5	19.3	15.1	3.5	3.7	2.9	0.1	0	0.2	0	0	0	AAEL022971
LOC110674212	0.4	0.4	0.7	0.1	0.2	0.2	0.7	1.3	0.7	0.6	1.4	1	0.3	1.1	0.5	AAEL025419
LOC110674213	0.1	0.1	0	0.2	2.6	2.4	0.8	1.1	0.6	0.2	0.1	0.2	0	0	0	AAEL021783
LOC110674214	0.2	0.9	0.2	0	0.2	0.1	0.7	0.7	0.6	0.5	0.2	0.5	0.4	0.4	0.5	AAEL024306
LOC110674215	0	0	0.5	0.1	0	0	0	0	0.6	63.2	55.9	52	6.6	5.9	3.3	AAEL020470				GO:0004252,GO:0006508,GO:0008233,GO:0008236,GO:0016787	serine-type endopeptidase activity,proteolysis,peptidase activity,serine-type peptidase activity,hydrolase activity
LOC110674216	2	2.4	2.2	2	2.9	5.1	0.8	1.2	0.6	1.2	0.2	0.6	0.4	0.3	0.2	AAEL025097
LOC110674217	0.1	0.2	0.2	0	0	0	0.2	0.1	0.1	0	0	0.2	0.1	0	0	AAEL020511
LOC110674218	0.2	0	0.2	0	0	0.1	0.7	0.6	0.9	0.3	0.1	0	0.1	0	0.1	AAEL023250
LOC110674219	0	0	0	0	0.1	0.2	0.2	0	0.2	0	0	0	0	0	0	AAEL026807
LOC110674220	0	0.2	0.3	0.2	0.3	0	0.4	0.2	0.1	0.8	0.2	0.4	0.1	0.8	0.4	AAEL020368
LOC110674221	0.8	1.3	0.1	0.3	0.8	0.8	0.2	0.1	0.2	52.4	34.4	36.1	28.9	25	24.6	AAEL025109
LOC110674222	0	0	0	0	0	0	0	0	0.1	0	0	0.1	0	0	0	AAEL023211				GO:0006629,GO:0016788	lipid metabolic process,hydrolase activity, acting on ester bonds
LOC110674223	0	0	0	0	0	0	0.2	0.3	0	0.2	0	0	0.1	0.2	0	AAEL027863
LOC110674224	1.9	2.7	1.5	1	1.1	0.7	1.9	1.7	1.1	0.4	0.1	0.2	0	0	0.2	AAEL022288
LOC110674225	8.9	8.9	9.9	2.8	3	2.7	2.3	3.6	2.3	6.8	7.2	5.6	4.8	7.8	4.9	AAEL026960
LOC110674226	0.3	0.4	0.4	4.1	0.2	0.2	0	0.1	0.2	0	0	0	0	0	0	AAEL024501
LOC110674227	0.4	0.6	0.8	1.3	1.8	1.1	2.9	2.8	2.8	0.3	0.4	0.5	0.9	0.2	0.8	AAEL020782
LOC110674228	1.5	4.4	1.3	4.9	2.6	3.1	4.1	2.9	3.5	0.2	0.1	0.4	0.3	0	0.2	AAEL024918
LOC110674229	19.4	15.7	15.3	10.7	10.4	12	10.9	9.9	10.6	73	56.4	58.4	56.5	80.9	54	AAEL023323
LOC110674230	14	15	13.1	5.3	13.3	11.8	1.6	1.7	2	0.1	0.1	0.1	0.1	0.3	0.1	AAEL026257				GO:0005515	protein binding
LOC110674231	0.3	0.3	0.3	0.4	1.3	1.8	0.9	1.2	1.1	0	0	0	0	0	0	AAEL022721				GO:0008270	zinc ion binding
LOC110674232	0.6	1.9	1.4	0.7	0.6	0.8	0.8	1	1	0	0.1	0.1	0.1	0.1	0	AAEL024405
LOC110674233	3.7	3.7	4.2	6.4	6.8	8.2	4.7	5.3	5.1	1.6	1.9	1.8	1.8	0.4	1.5	AAEL020626
LOC110674234	2.2	2.2	2.4	1.7	2.9	3.4	2	2.3	1.9	1.8	1.6	1.3	0	0.1	0.1	AAEL025079
LOC110674235	0.6	0.5	1	0.2	1.1	2.2	0.9	0.5	0.4	0	0.2	0	0.1	0	0.1	AAEL021803
LOC110674236	1.2	2.8	1.6	1.2	2	0.6	12.2	12.9	12.3	1.9	2.7	1.9	3.8	2.8	4.1	AAEL026186
LOC110674237	3	1.3	0.6	0.8	1.3	0.9	0.5	0	0.7	2.1	0.7	0.7	1.3	0.6	2.7	AAEL026466
LOC110674238	4.9	3.9	4.9	2.9	4.2	4.3	1.2	2.1	1.5	7.1	6.7	6.7	3	2.1	2.9	AAEL022787
LOC110674239	1.9	1.8	1.9	2.5	2.1	1.7	1.7	1.8	1.4	0	0.2	0.3	0.7	0.4	1	AAEL027705
LOC110674240	18	16.5	19.1	15	12.5	17.5	11.7	8.5	9.8	20	21.9	17.3	3.6	3.2	3.6	AAEL025375				GO:0003824	catalytic activity
LOC110674241	47.7	38.4	39.4	21.9	27.3	25.6	19.5	17.3	16.8	6.2	5.8	7.2	8.6	8.6	11.4	AAEL020542				GO:0046872	metal ion binding
LOC110674242	3.3	1.1	2.1	3.8	0.1	0.1	0	0	0	0	0	0	0	0	0	AAEL024400
LOC110674243	0	0.3	0.1	0.3	0.1	0	0.2	0.1	0.2	0	0	0	0	0	0	AAEL023752
LOC110674244	0.6	0.5	0.6	2.2	2.4	1.6	6.9	6.7	7.3	0.4	0.6	0.1	0.2	0.2	0.2	AAEL027565
LOC110674245	0.7	0.6	0.7	1.7	3.3	4.2	1	0	0.2	0	0	0	0	0	0	AAEL022811
LOC110674246	0	0	0.1	0.5	0.4	0	0.2	0.2	0.2	0.2	0.1	0.2	0.1	0.1	0	AAEL022117
LOC110674247	0	0	0	0	0.2	0	0	0.2	0	0	0	0	0.2	0	0	AAEL025500
LOC110674248	0.3	0	0	0.1	0.4	0.3	1.3	0.7	0.9	0.7	0.3	0.2	0.2	0.3	0.7	AAEL020920
LOC110674249	1.3	0.4	1.1	3.5	5.5	1.7	9.5	8.1	10.3	1.8	1.6	1.9	1.2	0.8	1.2	AAEL024702
LOC110674250	8.7	17.5	20.4	0.7	0.7	0.5	15.2	14.5	11	0	0	0	0	0	0	AAEL020427				GO:0003677,GO:0006355,GO:0043565	DNA binding,regulation of transcription, DNA-templated,sequence-specific DNA binding
LOC110674251	2.8	2.1	2.5	3.4	2.5	2.2	5.5	2.3	7.1	1.5	3.1	1.9	10.9	10	6.4	AAEL025792
LOC110674252	1.6	1.3	3	3	6.8	1.7	3.1	4.2	3.1	0.8	1.1	1.2	3.2	2.9	5	AAEL026823
LOC110674253	4.1	6.7	3.9	8.2	11.1	5.9	9.2	9	9.9	1.7	0.8	0.2	2.7	2.6	1.1	AAEL022319
LOC110674254	0.1	0.1	0.2	0.7	0.2	0.6	0.4	0.2	0.2	0	0	0.1	0.1	0	0	AAEL027894
LOC110674255	0	0.1	0	0	0	0	0	0	0	0	0	0	0	0	0	AAEL024045
LOC110674256	0	0	0	0	0	0	0	0	0	0	0	0	0	0	0	AAEL028216
LOC110674257	0.1	0.4	0.2	0	0.1	0	1.9	2	2	0.2	1	0.2	1	1.2	0.5	AAEL023571				GO:0003676,GO:0015074	nucleic acid binding,DNA integration
LOC110674258	0.8	0.5	0.8	2.1	1.3	1.3	0.8	0.5	0.3	0.1	0.1	0.2	0.6	0.5	0.2	AAEL025154
LOC110674259	0	0	0	0	0	0	0.1	0.1	0.1	0	0	0	0	0	0.1	AAEL020142				GO:0003676,GO:0008270	nucleic acid binding,zinc ion binding
LOC110674260	0	0	0	0.1	0	0	0	0	0	0	0	0	0	0	0	AAEL027158
LOC110674261	0.4	0.9	0.6	0.1	0.1	0.5	0	0	0	0	0	0	0	0	0	AAEL022652
LOC110674262	1.5	1.4	1.4	0.7	0.7	0.3	0	0.2	0.1	0.1	0	0	0	0.1	0	AAEL026677
LOC110674263	0.1	0.1	0.2	0.7	1.5	0.1	5	5	5.4	346.3	167.2	278.2	198	204.7	111.1	AAEL023991
LOC110674264	0.1	0.1	0	0	0.1	0.1	0	0	0.1	0	0	0.2	0	0	0	AAEL027595				GO:0003924,GO:0005525,GO:0007165,GO:0016020	GTPase activity,GTP binding,signal transduction,membrane
LOC110674265	1.6	1.7	1.8	0.8	2.5	2.2	0.2	0.3	0.4	0	0	0	0.1	0	0	AAEL024879
LOC110674266	0.6	0.3	0.5	1.3	2.7	1.4	6	5.9	6.4	5.6	6.7	6.9	15.6	17.9	19.1	AAEL020748				GO:0005576,GO:0008061	extracellular region,chitin binding
LOC110674271	1.2	2	0.9	1	0.4	0.1	0.7	0.3	0.5	0.1	0.1	0.4	0.3	0.5	0.1	AAEL023965				GO:0005634,GO:0008270	nucleus,zinc ion binding
LOC110674272	0	0	0	0	0.2	0	0.3	0.4	0.3	0.1	0	0.2	0.2	0	1	AAEL028174				GO:0046983	protein dimerization activity
LOC110674273	0.1	0.1	0	0	0	0	0	0	0	0.7	1.1	0.6	0.4	0.2	1.5	AAEL024693				GO:0080019	fatty-acyl-CoA reductase (alcohol-forming) activity
LOC110674274	0	0	0.1	0.1	0	0.1	0.2	0.1	0.1	0	0.1	0.1	0	0.2	0.1	AAEL020572				GO:0003723,GO:0005737,GO:0030430	RNA binding,cytoplasm,host cell cytoplasm
LOC110674275	1.4	1.7	1.1	0.4	0.4	0.4	2.8	2.3	2.1	0.1	0.1	0.1	0.2	0.2	0.2	AAEL025251
LOC110674276	3.4	2.4	3.9	6	7.8	2.5	22.7	22.4	24.7	0.9	0.4	0.2	1.1	0.8	1.8	AAEL021959
LOC110674277	0	0	0	0	0	0	0	0	0	0	0	0	0	0	0	AAEL025902
LOC110674278	0	0	0	0	0	0	0	0	0	0.7	0.3	0.3	0.5	1.1	0.4	AAEL023135				GO:0003677	DNA binding
LOC110674279	0	0	0	0	0	0	0	0	0	0	0	0	0	0	0	AAEL027507
LOC110674280	0.2	0	0.9	0.6	0	0	0.2	0	0	0	0	0.2	0	0	0	AAEL020206
LOC110674281	0	0	0	0	0	0	0	0	0.1	0	0	0	0	0	0	AAEL025706
LOC110674282	0	0	0	0	0.1	0	0	0	0	0	0.1	0	0	0	0	AAEL021819
LOC110674283	7.1	7	10.5	5.7	4.3	4.1	6.1	7.6	6	2.2	1.1	2.7	1.8	2.3	1.8	AAEL025378				GO:0008270	zinc ion binding
LOC110674284	0	0	0	0	0	0	0	0	0	0	0	0	0	0	0	AAEL026762
LOC110674285	0	0	0	0	0.1	0	0	0.1	0	0.1	0	0.1	0.2	0.3	0.2	AAEL022260
LOC110674286	0.9	0.8	0.7	0	0.6	0.4	0.6	0.4	0.2	0.4	0	0.1	0.3	0.1	0.4	AAEL026584
LOC110674289	6.4	9.1	5.9	3.6	4	2.2	4.5	6.2	6.2	12.8	13.3	15.1	5.1	6.8	6.2	AAEL021015				GO:0008083	growth factor activity
LOC110674290	12.9	11.6	12.4	6.7	7.9	6.6	14.5	13.6	16.3	1.9	2.4	1.4	5.6	3.8	4	AAEL026374				GO:0005634,GO:0006281,GO:0006974,GO:0070876	nucleus,DNA repair,cellular response to DNA damage stimulus,SOSS complex
LOC110674291	3	5.7	4.2	1.5	3.2	4.4	3.3	4.3	3.7	6.8	3.1	7.2	6.9	4.6	6.1	AAEL022820
LOC110674292	0	0	0	0	0	0	0	0	0	0	0	0	0	0	0	AAEL025537
LOC110674294	0	0	0	0	0	0	0.1	0.2	0.1	0	0.1	0	0	0	0	AAEL023780				GO:0003676,GO:0003677	nucleic acid binding,DNA binding
LOC110674295	0	0	0	0	0	0	0	0	0	0	0	0	0	0	0	AAEL020949
LOC110674296	0.1	0.3	0.1	0.4	0	0	0.1	0	0.1	0	0	0	0	0	0	AAEL022852
LOC110674297	0.5	0.2	0.3	1.1	0	0.1	0	0	0	0	0	0	0.3	0	0	AAEL027207
LOC110674298	0	0	0	0	0	0	0	0	0.1	0	0	0	0	0	0.2	AAEL021899
LOC110674299	0	0	0	0	0	0	0	0	0	0	0	0	0	0	0	AAEL026542
LOC110674301	0.1	0.2	0.1	0.2	0.1	0	0	0.1	0	0	0	0	0	0	0	AAEL026518				GO:0046983	protein dimerization activity
LOC110674302	0	0	0	0	0.1	0	0.3	0.7	0.4	0	0	0.1	0.2	0.3	0.2	AAEL025899
LOC110674303	0	0	0	0	0.2	0	0.3	0.4	0.4	0.1	0.1	0.1	0.2	0.5	0.1	AAEL021194
LOC110674305	0.7	2.3	1.4	0.2	0.2	0.2	1.2	1.2	1.2	0	0.1	0.1	0.2	0	0	AAEL020036
LOC110674306	0	0	0.1	0	0.1	0	0.1	0	0	0.5	0.5	0.9	3.3	5.6	4.2	AAEL027689				GO:0016747	transferase activity, transferring acyl groups other than amino-acyl groups
LOC110674308	0	0	0	0	0	0	0.5	0.6	0.2	0	0	0	0	0	0	AAEL026465
LOC110674309	0.1	0.1	0.1	0.3	0.1	0.1	0.2	0.3	0.3	0	0	0	0	0.1	0	AAEL023915
LOC110674310	0	0.1	0	0.2	0.1	0.1	0.1	0.1	0	0	0	0.1	0.1	0.1	0	AAEL022101				GO:0016020,GO:0016021	membrane,integral component of membrane
LOC110674311	0	0	0	0	0	0	0	0	0	0	0	0	0	0	0	AAEL025542
LOC110674312	0	0.4	0.3	0.1	0	0	0.1	0.2	0.1	0.1	0	0.1	0.2	0	0.1	AAEL022870				GO:0003676	nucleic acid binding
LOC110674313	24.8	21.1	22.5	16.2	14.2	14.2	12.2	11.7	10.6	1.3	1.6	1.4	1.8	1.9	2.1	AAEL009724				GO:0003676,GO:0005634,GO:0008270,GO:0046872	nucleic acid binding,nucleus,zinc ion binding,metal ion binding
LOC110674314	0	0	0	0	0	0	0.1	0.1	0	0	0	0	0	0	0	AAEL023811				GO:0003676,GO:0008270	nucleic acid binding,zinc ion binding
LOC110674315	0	0.1	0	0	0.1	0	0.2	0.1	0.2	0	0.1	0	0.1	0.2	0.1	AAEL027252
LOC110674316	0	0.1	0	0	0.1	0	0.2	0.2	0.2	0	0	0	0.1	0.1	0.1	AAEL024440				GO:0003723,GO:0005737,GO:0030430	RNA binding,cytoplasm,host cell cytoplasm
LOC110674317	0	0.1	0	0	0.1	0	0.2	0.2	0.1	0	0	0	0.1	0.1	0.1	AAEL028186
LOC110674318	0	0.1	0	0	0.1	0.1	0.2	0.3	0.2	0	0.1	0	0.1	0.2	0.1	AAEL025290
LOC110674319	0	0	0	0.1	0	0	0	0.3	0	0	0	0	0	0	0	AAEL020934
LOC110674320	38.4	28.5	27.2	13.9	11.1	9	6.1	8.1	2.5	0.3	0.4	0.7	0.7	0.3	0.2	AAEL020431
LOC110674321	0	0.3	0	0	0.1	0.1	0.1	0.1	0.1	0	0	0	0	0	0.1	AAEL027262
LOC110674322	6.7	6	7.1	3.8	3	1.5	5.4	5.2	5.8	1.4	1.2	1.5	2.3	2.2	2.3	AAEL021322
LOC110674323	0	0	0	0	0	0	0.2	0.1	0	0	0	0	0.1	0	0	AAEL025168				GO:0003735,GO:0005840,GO:0006412	structural constituent of ribosome,ribosome,translation
LOC110674324	0.2	0.2	0.2	0.4	0.2	0.1	0.2	0.3	0.3	0.1	0	0.1	0	0.1	0	AAEL022048
LOC110674325	0.6	0.4	0.8	0.4	0.6	0.2	0.8	1.3	0.4	0	0	0	0	0	0	AAEL025699
LOC110674326	1	0.2	1	0.1	0.1	0.2	0.2	0.3	0.2	0.1	0.1	0.1	0	0.1	0.2	AAEL026721				GO:0003676,GO:0003677	nucleic acid binding,DNA binding
LOC110674327	0	0	0	0	0	0	0	0	0	0	0	0	0	0	0	AAEL022231
LOC110674328	0.1	0.2	0	0	0	0	0.7	0.9	0.2	0.1	0.2	0.2	0.2	0.2	0.3	AAEL027433				GO:0046983	protein dimerization activity
LOC110674329	0	0.2	0.8	0.9	0	0.1	0	0.1	0	0	0	0	0	0	0	AAEL022694
LOC110674331	0.1	0.3	0.1	1.9	0.8	0.7	0.1	0.3	0.2	0	0	0.1	0.1	0	0	AAEL027630
LOC110674334	0	0	0	0	0	0	0	0	0	0	0	0	0	0	0	AAEL025293
LOC110674336	0.1	0.3	0.1	0.2	0.1	0.2	0.4	0.3	0.3	0.1	0	0	0.1	0.1	0.1	AAEL025832
LOC110674337	0	0.1	0	0	0	0	0	0.1	0.1	0	0	0	0	0.2	0	AAEL021267
LOC110674339	0.1	0	0	0	0	0	0.1	0	0	0	0	0	0	0	0	AAEL022998
LOC110674340	0.2	0	0	0	0	0	0.1	0.1	0.1	0	0	0	0	0.1	0.1	AAEL021130				GO:0003677,GO:0006355	DNA binding,regulation of transcription, DNA-templated
LOC110674341	0.2	0.2	0	0.1	0.4	0	0	1.7	0.2	633.2	273.6	282.2	3879.3	2839	1812	AAEL025723
LOC110674342	0	0	0.1	0.1	0	0.1	0	0	0	0.1	0.3	0.1	0.1	0.1	0.1	AAEL022081
LOC110674343	1.3	0.4	0.8	1.8	3.2	1.8	15.6	15.8	17.2	9.5	9.4	9.8	6.3	5.4	8	AAEL022520				GO:0006629,GO:0016788	lipid metabolic process,hydrolase activity, acting on ester bonds
LOC110674344	0	0	0.2	0.2	1.8	1.8	0.9	1	0.9	0	0	0	0	0	0	AAEL025958				GO:0006520,GO:0016491,GO:0016639,GO:0055114	cellular amino acid metabolic process,oxidoreductase activity,oxidoreductase activity, acting on the CH-NH2 group of donors, NAD or NADP as acceptor,oxidation-reduction process
LOC110674346	1.3	0.6	0.1	0.1	0.3	0.2	0.2	1.1	0.2	68.7	115.1	177.7	2156.9	2405.9	1107.3	AAEL025120
LOC110674347	2.2	2.6	1.2	2.9	2.2	0.8	5.5	5.1	6.6	2.5	2.4	1.9	1.5	0.8	0.5	AAEL020532
LOC110674348	1.2	2.6	0.9	1.6	1.7	1.3	3.5	3.2	2.7	0.1	0.1	0	0.1	0.1	0.2	AAEL027741
LOC110674349	1	1.6	0.8	0.1	0.4	0.7	1.6	0.7	0.5	0	0	0	0	0	0.1	AAEL023272
LOC110674350	3.4	4.5	2.8	1.9	3.7	3.2	1.5	1.3	1	0.2	0	0.1	0	0	0.1	AAEL023010
LOC110674351	0.5	0.8	0.2	0.2	0	0	0	0	0	0.1	0	0	0	0	0.1	AAEL026435
LOC110674352	0	0	0	0	0	0	0	0	0	0	0	0	0	0	0	AAEL022677
LOC110674353	0	0.1	0.1	0	0	0	0.1	0.2	0.2	0	0	0	0	0.1	0	AAEL026268
LOC110674354	0.2	0	0	0.2	0.9	1.1	0.4	0.5	0.1	0.1	0.1	0	0.1	0.1	0	AAEL023861
LOC110674355	0.1	0.1	0	0.1	0.4	0.1	0.2	0.4	0.2	0.1	0	0	0.2	0.1	0	AAEL027456
LOC110674356	0	0	0	0	0	0	0	0	0	0	0	0	0	0.3	0	AAEL024537
LOC110674357	0.4	0.3	0.5	1.5	1.1	0.2	3.5	3	1.9	1.8	1	1.4	0.3	0.7	0.6	AAEL021777
LOC110674358	0	1.4	2.6	0	1.1	0	0.7	0	0.9	0	0	0	0	0	0	AAEL025616
LOC110674359	0	0.2	0.3	0.1	0.7	0.2	0.2	0.5	0.2	0	0	0.2	0.1	0.2	0	AAEL023139
LOC110674360	29.7	23.6	22.5	4.8	14.9	15.4	15.3	18.9	15.3	1.6	0.9	1.2	0.4	0.1	0	AAEL021530
LOC110674361	33.4	98.7	30.7	25.9	29.3	26.2	15	16	16.6	0.9	0.5	0.7	0.4	0.3	0.3	AAEL026084
LOC110674362	0.1	0.4	0	0.4	0.8	0.4	0.4	0.9	1	0	0	0	0.1	0.1	0.1	AAEL020364
LOC110674363	0	0.2	0	0	0	1.1	0	0.3	0	0	0	0	0.1	0	0	AAEL025000
LOC110674364	2.4	1.1	0.8	0.8	1.8	1.3	1.3	0	0	0	0	0	0	0	0.1	AAEL020407
LOC110674365	4.5	3.2	2.6	0.5	0	0	0.2	0	0.2	0	0	0	0	0	0	AAEL025204
LOC110674366	0	0	0	0	0.1	0.1	0	0	0.1	19.1	16.7	14.2	8.2	6.9	5.8	AAEL027739
LOC110674367	0.3	0.1	0.2	0.7	0.9	0.9	1.5	2.9	2	0	0	0.2	0.3	0.4	0.2	AAEL022199
LOC110674368	0.6	0.5	0.4	0.3	0.4	0.2	0.1	0.3	0.2	0	0	0	0.1	0.1	0	AAEL026875
LOC110674369	0	0	0	0	0	0	0	0.3	0.2	0	0	0	0	0	0	AAEL021277
LOC110674370	0.3	0.2	0.2	0.3	0.2	0.2	1.1	1	0.9	0.1	0.1	0	0.1	0.1	0.1	AAEL021649
LOC110674371	0	0.3	0.1	0.1	0.2	0.2	0.3	0.5	0.7	0.5	0.1	1	2.9	3.6	1	AAEL024421
LOC110674372	31.1	31.2	30.5	28.7	23.4	32.9	3.1	3.5	2.8	0.4	0	0	0	0.2	0	AAEL020862
LOC110674373	0.1	0	0	0	0	0	0	0.3	0.1	0	0	0	0	0.1	0	AAEL025329
LOC110674374	0	0	0	0	0	0	0	0.1	0	0	0	0	0	0.5	0	AAEL021816
LOC110674375	0.5	0.4	0.2	0.1	0.3	0.4	0	0.3	0.1	0	0	0.1	0.1	0	0	AAEL026639
LOC110674376	1.4	0.3	0.3	1.9	1.5	1.6	1.9	1.7	3.1	0.3	0.8	0.6	1.4	1	0.2	AAEL023023
LOC110674377	0	0.1	0.1	0	0	0.1	0	0.1	0	0	0	0	0	0	0	AAEL027812				GO:0046983	protein dimerization activity
LOC110674378	0.1	0.2	0.3	0.1	0.1	0.2	0	0	0	0	0	0	0	0	0	AAEL024183
LOC110674379	0	0	0.1	0.4	0.3	0.2	1	1.3	0.7	0.2	0.6	0.2	0.7	0.5	0.7	AAEL020697
LOC110674380	0	0.1	0	0.2	0.1	0.1	0.4	0.2	0.3	0	0	0	0.3	0.1	0.1	AAEL027370
LOC110674381	18.3	52.1	53.9	449.5	51.1	234.1	6.2	15.1	7.2	0.2	0.7	0	0.1	0.6	0.2	AAEL020841
LOC110674382	2.9	11.6	3.9	0	0	0	0.5	0.8	0.6	0	0	0	0	0	0	AAEL024543
LOC110674383	0.6	0.5	0.6	0.6	0	0.6	0.6	0.4	0.2	0.2	0	0.2	0	0	0	AAEL027383
LOC110674385	0.1	0.2	0.1	0.2	0.2	0.4	1.2	1.9	1.6	0	0.1	0.1	0.3	0.1	0.2	AAEL022244
LOC110674386	0.1	0.1	0	0	0.4	0.1	0.6	0.8	0.4	0.1	0	0.1	0	0.2	0.1	AAEL028176
LOC110674387	2.6	2.6	1.9	2.1	2.2	1.1	2.3	2.1	5.4	0.1	0.5	0	0.2	0.9	0.8	AAEL021566
LOC110674388	0.3	0	0	0	0.7	1.2	0.3	0.4	0.4	0	0	0	0	0.2	0	AAEL027043
LOC110674389	6.9	6.5	7.1	6.8	2.6	3.4	0.3	0.4	0.4	1.6	1.7	1.4	5.9	5.9	6.4	AAEL024518
LOC110674390	35	45.8	42.2	30.3	38.6	38.6	36.4	33.6	35.1	26.1	20.3	21.9	36.2	40	30.9	AAEL026769
LOC110674391	0.1	0.3	0	0.1	0	0	0.4	0.8	0.4	0	0	0.1	0	0	0.1	AAEL024205
LOC110674392	0.1	0	0	0	0	0	0.1	0.1	0.1	0	0	0.1	0	0	0	AAEL022178
LOC110674393	0.3	0	0.8	1.2	0.8	0	0.9	0.9	1.8	0	0	0	0.3	0.2	0	AAEL027800
LOC110674394	0.1	0.5	0.1	1.1	1.1	0.4	1.6	1.7	1.3	0.2	0.1	0.2	0.6	0.1	0.3	AAEL024123
LOC110674395	0	0.4	0.3	0.1	0.5	1.7	0.4	0.6	0.1	0	0.1	0.2	0.3	0.6	0	AAEL021370
LOC110674396	0	0	0	0	0	0	0	0	0	0	0	0	0	0	0	AAEL024989
LOC110674397	0.8	0.7	1.3	2.5	1.4	0.8	1.8	1.4	2.8	0.7	0.2	0.7	0.5	0.8	0.6	AAEL026489
LOC110674398	0.2	0	0.2	0.3	0.2	0.3	0.6	0.4	0.8	0	0	0	0	0	0	AAEL025820
LOC110674399	0.2	0.2	0.3	0.3	0.2	0.2	0.3	0.1	0.2	0	0	0	0.1	0	0	AAEL023228				GO:0006506,GO:0016021,GO:0016746	GPI anchor biosynthetic process,integral component of membrane,transferase activity, transferring acyl groups
LOC110674400	0.8	0.4	1.6	0.4	0.8	0.1	1.9	1.2	0.9	0.6	0.2	1.1	0.7	0.6	0.6	AAEL020854
LOC110674401	5.5	7.8	6.5	7.2	7.9	8.4	8.4	12.7	9.6	4.1	3.8	3.7	26.4	19.2	18.6	AAEL024661
LOC110674402	0.5	0	0.3	0.7	0.3	0.1	1.1	0.6	0.8	0	0.2	0.2	0.2	0.4	0	AAEL022024
LOC110674403	0.6	0.5	0.3	0.6	0.9	0.4	1.3	1.3	1.5	0	0	0	0.2	0.1	0	AAEL026779
LOC110674404	0.3	0.7	0.2	0.2	0.2	0.4	0.2	0	0	0	0	0	0	0	0	AAEL026398
LOC110674405	0	0	0	0	0	0	0	0.2	0	0	0	0	0	0	0	AAEL022823
LOC110674406	0.2	0	0.2	0.4	0	0	0	0	0	0	0	0	0	0	0.1	AAEL027294
LOC110674407	0.3	0.9	0.4	0.8	0.6	0.4	0.5	0.5	0.3	0.3	0.2	0.3	0.1	0.2	0.2	AAEL023748
LOC110674408	0	0	0.3	1.6	0.7	1.3	1.4	1.6	1.2	0	0	0.2	1	0	0	AAEL020588
LOC110674409	7.3	7.6	6.9	0.3	0.4	0.3	1.2	0.7	0.8	0.2	0.1	0.3	0.1	0.1	0.1	AAEL023198
LOC110674410	1.5	1.9	0.9	1.8	1.8	1	1.1	0.6	1.3	1	1.4	1	2.5	2.7	1.1	AAEL026068
LOC110674411	0.1	0.3	0.5	0.9	1.5	0.5	1.5	1.4	1.7	0	0.1	0.2	0.1	0	0	AAEL020458
LOC110674412	5.1	4	4	1.8	3.3	2.8	2.4	2.8	2.4	0.7	0.8	0.9	0.9	1.1	1	AAEL024875
LOC110674413	1.8	1.2	2.5	3.6	2.8	2.7	8.3	6.8	7.1	0.7	0.5	0.6	0.6	0.2	0.2	AAEL027455
LOC110674414	0	0.3	0.1	0.5	0.5	0.4	0.3	0.4	0.3	0	0	0	0.1	0	0	AAEL027760
LOC110674415	1.3	1.7	1.4	0.9	1.5	1	1.6	1.5	1.4	0.1	0.2	0.3	0.2	0	0.1	AAEL022205
LOC110674416	1.8	6.8	2.5	4.6	4.8	3.1	4	3.9	4.2	0.2	0.3	0.1	0.2	0.3	0.3	AAEL025627
LOC110674417	4.2	2	1.7	3.8	4.9	4.1	4.9	5.6	5.2	0.4	0.4	0.2	1.3	1.2	1.4	AAEL022106
LOC110674418	0.1	0.2	0.1	0	0	0	0	0	0	0	0	0	0	0	0	AAEL021454
LOC110674419	0.9	1.1	1.1	1.4	2	1	1.9	1.6	1.5	0.1	0.6	0	1	0.6	0.1	AAEL026133
LOC110674420	0.7	0.2	1.2	0.3	1.2	0.9	2.6	2.3	1.8	0.2	0.1	0	0.4	0.3	0.8	AAEL021233
LOC110674421	0	0	0.1	0	0	0	0	0.1	0	0.6	0.3	0.4	0.1	0.3	0	AAEL025913				GO:0016020,GO:0016192	membrane,vesicle-mediated transport
LOC110674422	1.9	0	0.3	0.7	2	2.9	1	1.4	2	0	0.4	0	0	0	0.1	AAEL020079
LOC110674423	0	0	0	0.3	0.2	0	0.5	0.2	0.1	0	0	0	0	0.1	0	AAEL024866
LOC110674424	3.7	1.4	3.1	6.6	10.1	4.3	12.9	12.9	14.2	0	0	0	0	0	0.2	AAEL027109
LOC110674425	4.1	3.1	2.9	3.5	3.9	1.8	12.7	13.1	13.5	0.1	0.3	0	0.3	0.1	0.3	AAEL025535
LOC110674426	2.3	1.7	3.1	4.7	5.7	2.3	4.5	5.4	3.8	0.2	0.4	0.1	0.1	0.2	0.3	AAEL021640
LOC110674427	0.6	0.8	0.9	1.3	1.3	1.9	1.6	2.3	2.1	0.1	0	0	0	0	0.2	AAEL024656
LOC110674428	0.6	0.2	0.3	0.6	0.6	0.5	0.5	0.3	0.4	0.1	0.1	0	0.2	0.2	0.2	AAEL027343
LOC110674429	37.4	45.7	44.2	27.1	33.2	42.4	21.5	16.4	17.2	2.2	5.8	1.3	7.9	5.4	5	AAEL023703
LOC110674430	0	0	0	0.2	0.1	0	0.2	0.1	0	0	0	0	0.4	0.1	0.1	AAEL027244
LOC110674431	0	0	0	0	0	0	0	0	0	1.2	1.6	5.1	0.6	0	0.6	AAEL023918
LOC110674432	11	13.9	11.8	8.1	11	12.6	6.8	7.1	7.1	0.3	0.2	0.2	1.2	1.7	1.7	AAEL026329
LOC110674433	0.3	0.4	0.5	1.1	1	1.1	1.1	1.2	1.5	0	0.2	0	0.4	0.9	0.2	AAEL021438
LOC110674434	0.6	1.2	2.1	0.1	0	0	0	0.1	0	0	0	0	0	0	0	AAEL021850
LOC110674435	14.6	19.7	15.8	9.6	4.9	3.9	4.1	4.1	2	2.7	2.6	4.2	3.9	3.7	5	AAEL024631				GO:0005634,GO:0008270	nucleus,zinc ion binding
LOC110674436	0.4	0	0	0.6	1.4	0.4	0.9	1.8	1.8	0.1	0.1	0.2	1.3	1.2	0.1	AAEL020908
LOC110674437	0.7	1.1	1.6	1.2	1.8	1.2	1.9	1.5	1.6	0.2	0.8	0.7	0.2	0.1	0.3	AAEL023260
LOC110674438	0	0	0	0	0	0	0	0	0	0	0	0	0	0	0	AAEL025105
LOC110674439	0.3	0.1	0.2	0	0.2	0	0	0.4	0	0	0.2	0	0	0	0.2	AAEL027345
LOC110674440	0	0.4	0	0.2	0.3	0.6	1	2.4	2.8	0.1	0.2	0.1	0	0	0	AAEL024638
LOC110674441	0	0.1	0.1	0	0.1	0	0	0	0	0.3	0.2	0.2	0.2	0.2	0.4	AAEL024067
LOC110674442	0.2	0	0	0	0	0	0	0	0	0	0	0	0	0	0	AAEL027517
LOC110674443	0	0	0	0	0.1	0.1	0	0.2	0	0	0	0	0	0	0	AAEL022888
LOC110674444	0.5	0.4	0.7	1.9	0.5	0.7	2	2.2	2.4	0.2	0.6	0	0.2	0.1	0.1	AAEL023304
LOC110674445	0.5	0.3	0	0.2	0.3	0.2	0.6	1	1.5	0.1	0	0	0.1	0.2	0.2	AAEL027647
LOC110674446	0	0	0	0	0	0	0.1	0	0.3	0	0	0.1	0	0.2	0	AAEL022973
LOC110674447	0.6	0.2	0.6	1.6	2.6	1.5	0.9	1.6	1.9	0.4	0.2	0.1	0.6	0.3	0.3	AAEL026450
LOC110674448	0.2	0.1	0.2	0.3	0.1	0.2	0.8	0.7	0.7	0	0.1	0.1	0.1	0	0	AAEL021763
LOC110674449	0	0.3	0.2	0.4	0.5	0.3	0.1	0	0.2	0	0	0	0	0	0	AAEL025396
LOC110674450	1.7	1.8	1.9	1	0.5	0.3	1.7	1.8	2.6	0.1	0.1	0.4	0.2	0.4	0	AAEL025063
LOC110674451	0	0	0.1	0	0.5	0.3	0.4	0.5	0.6	0.1	0.3	0.3	0.3	0.2	0.1	AAEL020331
LOC110674453	0	0	0	0	0	0	0	0	0	0	0.1	0.2	0.3	0.1	0.3
LOC110674454	0.5	0.3	0.3	0.3	0.1	0.1	0.6	0.7	0.3	0	0.2	0.1	0.1	0.3	0.1	AAEL026763
LOC110674455	13.2	2.3	1.1	0	1.1	2.8	0.3	0.2	1	0	0	0	0	0.1	0	AAEL022182
LOC110674456	0.3	1.4	0.8	0.5	0.4	0.5	0.4	0.1	0	0	0.1	0.1	0	0.1	0.1	AAEL028042
LOC110674457	0	0	0.4	0.1	0.3	0.2	0	0.2	0	0	0	0	0	0	0	AAEL023356
LOC110674458	12.5	15.8	11.9	7.2	3.4	3.2	3.4	3	2.3	0.1	0.2	0.3	0.7	0.6	0.9	AAEL023673
LOC110674459	0	0.2	0.4	0.3	0	0.2	0.1	0.4	0.2	0	0	0	0.2	0.5	0.4	AAEL025117
LOC110674460	0	0.1	0	0	0.1	0	0	0	0	0	0	0	0	0	0	AAEL023153
LOC110674461	0	0	0	0	0	0	0	0.2	0	0	0	0	0	0	0	AAEL021536
LOC110674462	0.5	0.4	0.4	0	0	0	0	0	0	1.2	0	0.9	1.8	0.9	0.9	AAEL025716
LOC110674463	0	0	0	0	0	0	0	0	0	3	2.5	2.5	1.8	1.2	0.9	AAEL020501
LOC110674464	0	0	0	0	0	0	0	0	0	5	2.6	4.7	0.4	0.2	0.4	AAEL021898
LOC110674465	2.1	3.4	1.3	0.2	0.4	0.5	3.6	1.8	1.3	2.1	5.3	6.3	3.5	4.5	3.1	AAEL024582
LOC110674466	0	0.2	0.1	0.6	0.7	0.7	0.3	1.4	0.8	0.2	0	0.2	0.3	0.1	0.1	AAEL023375
LOC110674467	0.1	0	0	0	0.2	0	0.1	0.1	0.2	0	0	0	0.1	0.2	0	AAEL027972
LOC110674468	0.9	2.6	1.5	2.9	3.7	2.4	5	7	3.7	0.8	0.9	0.6	3.4	1.8	2.7	AAEL026198
LOC110674469	0	0	0	0.1	0.2	0.2	0.2	0	0	0	0	0.1	0	0	0	AAEL022742
LOC110674470	1.2	0.7	0.9	0.5	1.4	0.8	2	2.7	2.2	0.2	0.3	0.4	0.8	1.2	0.6	AAEL024399
LOC110674471	0	0.1	0	0.2	0.2	0.2	0.3	0.2	0.1	0	0.1	0	0.2	0.1	0	AAEL020674
LOC110674472	17.8	6.3	13.6	0.3	3.6	4.4	3.4	4.7	3.6	0.1	0	0	0	0	0	AAEL025312				GO:0005515	protein binding
LOC110674473	0	0	0	0	0	0	0.1	0	0	0	0	0	0.1	0	0	AAEL021643
LOC110674474	0.3	0.4	0.1	0.2	0	0.1	0	0	0	0	0.6	0	1.6	2	1.4	AAEL026617
LOC110674475	0.3	0.4	0.4	0	0	0.1	0.2	0.3	0.2	0.1	0.1	0.1	0.3	0.1	0.2	AAEL022138
LOC110674476	0.9	0.5	1.3	1.2	0.3	2	1.6	1.4	0.5	0	0	0	0.2	0	0.1	AAEL027592
LOC110674477	17.1	11.4	10.6	4.6	4.2	2.3	6	4.6	6.1	2.3	1.7	1.7	1.3	1.8	2	AAEL024110
LOC110674478	0	0	0	0	0	0	0.3	0.4	0.3	0	0	0	0	0.3	0	AAEL020694
LOC110674479	0.5	0.6	0.7	1.7	1.4	1.3	1.6	1.9	2.2	0	0	0	0.3	0	0.3	AAEL024404
LOC110674480	1.7	1.7	1.2	1.1	0.7	0.8	6.9	5	8.3	0.2	0	0	0	0.1	0	AAEL021496
LOC110674481	68.9	133	40.7	2.4	10.3	18.2	36.5	70.4	47	0	0	0.1	0	0	0	AAEL025523
LOC110674482	0	0	0.3	0	0	0	0.2	0.3	0.1	0	0	0	0	0	0	AAEL023974
LOC110674484	0.3	0.9	0.5	0.8	1.6	0.7	1.1	1.1	1.6	0	0	0	0	0	0	AAEL027781
LOC110674485	0.2	0.3	0	0.2	0.1	0.2	0.1	0.2	0.1	0	0	0	0	0	0	AAEL022235
LOC110674486	0.2	0.3	0	0.2	0.1	0.1	0.1	0.2	0.1	0	0	0	0	0	0	AAEL020996
LOC110674487	0.3	0	0	0	0	0.2	0	0	0	0	0	0	0	0	0	AAEL023462
LOC110674488	0.5	0.9	0.9	1	0.6	0.6	1.1	0.8	0.8	0.1	0	0.1	0	0	0.3	AAEL025445
LOC110674489	0	0.4	0.1	0	0.1	0	0	0	0.2	0	0	0	0	0.1	0	AAEL021969
LOC110674490	0.2	0	0.1	0	0	0.1	0	0.2	0	0	0	0	0.1	0.1	0.1	AAEL025428
LOC110674491	0.1	0.3	0.4	1	0.7	0.2	0.6	0.6	0.6	0	0.3	0.1	0.1	0.1	0	AAEL021920
LOC110674492	0.3	0.3	0.4	0.2	0.2	0.7	0.3	0.1	0.4	0	0.1	0	0	0	0	AAEL020005
LOC110674493	1.4	1.8	1.7	1.1	0.8	1	0.6	0.6	0.7	0.2	0.2	0.2	0.1	0.1	0.2	AAEL020613
LOC110674494	0	0	0	0.3	0.2	0.2	0	0.1	0	0	0.1	0.1	0.3	0.1	0.1	AAEL027824
LOC110674495	0	0.1	0.2	0	0	0	0.2	0	0.3	0	0	0	0.2	0.1	0.3	AAEL024102
LOC110674496	0	0.3	0	0	0	0	2.1	2.6	3.1	0	0	0	0.5	0	0	AAEL026511
LOC110674497	0	0	0.5	0	0	0	0.1	0	0.4	0	0.4	0.4	0	0	0.4	AAEL022960
LOC110674498	0.5	0.2	0.1	0.3	0.4	0.3	0.4	0.9	0.8	0	0	0	0	0.1	0.1	AAEL021988
LOC110674499	0.6	0.2	0.3	0.5	0.8	0.5	1.4	1.3	1.3	0.7	1	0.1	0.5	0	0.8	AAEL022257
LOC110674500	0	0.4	0	0.5	1.9	1.8	0.3	0.5	0.5	0	0	0	0.3	0	0.3	AAEL020053
LOC110674501	0	0	0	0	1	0	0.3	0.3	1.1	0.2	0	0.3	0.5	0.8	1.3	AAEL028173
LOC110674502	0	0	0	0	0	0	0	0	0.4	0	0	0	0	0	0	AAEL023648
LOC110674504	0.1	1.1	0.9	0.4	0.1	0	0.3	0.1	0.4	0	0	0	0.3	0.2	0	AAEL022492
LOC110674505	4	4.8	4.8	3.2	3.8	3.8	5.7	4.9	5.3	0.4	0.1	0.3	1.7	0.4	0.6	AAEL020060
LOC110674506	0	0.1	0.9	4.3	5.5	1.5	7.4	5.7	4.5	0	0	0.2	2.4	1.7	0	AAEL024705
LOC110674507	4	4.8	4.8	3.2	3.7	3.8	5.6	4.8	5.3	0.4	0.1	0.3	1.7	0.4	0.6	AAEL021268
LOC110674508	0.4	0.4	0.8	1.4	1.4	1.4	1.7	1.5	1.2	0.1	0.2	0	0.3	0.3	0.2	AAEL025816
LOC110674509	0.8	0.7	0.4	2.2	0.9	1.6	2.7	1.3	2.6	0.1	0	0	0.6	0.3	1.3	AAEL022374
LOC110674510	0	0.3	0.4	0.7	1.6	1.1	1.8	1	1.3	0.3	0.6	1.2	0.5	0.6	0.1	AAEL020797
LOC110674511	0	0.1	0.7	0.8	0.9	0.2	0.9	1.2	0.7	0	0.1	0	0.5	0.1	0.2	AAEL024677
LOC110674512	0	0	0	0.3	0	0.1	0	0.5	0.4	0.1	0.1	0	0.2	0.2	0.3	AAEL022036
LOC110674513	0	0.8	0.9	0	1.1	0	1.5	1.6	2.4	0	0	0.2	0.6	0.4	0.2	AAEL025301
LOC110674514	0	0.1	0.1	0.1	0.1	0.5	0.3	0.2	0	0	0	0.2	0	0.1	0	AAEL026925
LOC110674515	0	0	0	0	0.4	0.3	0.7	0	0.6	0	0	0.2	0	0	0.3	AAEL023316
LOC110674516	0.6	0.7	0.7	0.9	1.8	1	1.3	1.5	2.2	0	0.1	0.2	2.4	2.6	0.1	AAEL024877
LOC110674517	4.2	3.4	5.4	5.8	9.7	7.2	7.6	5.4	7.9	1.6	1.1	2.1	1.4	1	1	AAEL020813
LOC110674518	0	0.2	0	0	0	0	0.1	0	0.1	0	0	0	0	0	0	AAEL024538
LOC110674519	1.1	1.1	0.7	0.6	1.2	0.7	0.3	0.4	0.5	0.1	0.1	0.2	2.1	1.5	0.6	AAEL022070
LOC110674520	0.8	0.7	0.4	0.4	0.7	0.4	0.2	0.4	0.5	0.1	0.1	0.1	1.4	1	0.7	AAEL026346
LOC110674521	0.3	0.8	0.7	4.4	6.1	4.9	3.2	3.6	3.9	0	0	0.3	1.1	0.8	0.1	AAEL022894
LOC110674522	0.3	0.8	0.6	4.4	4.1	4.1	2.7	3	3.9	0	0	0.2	0.7	0.9	0	AAEL025485
LOC110674523	0.2	0.3	0.2	0.1	0.4	0.2	0.7	0.2	0.2	0	0.2	0	0	0	0	AAEL021974
LOC110674524	2.6	2.3	2.1	1.3	1.1	1.9	0.6	1.1	0.7	0.2	0.2	0.3	0.1	0.2	0.2	AAEL024555
LOC110674525	0.4	0.1	0.4	0.3	0.4	0.2	0.5	0.6	0.1	0	0	0	0.1	0	0.1	AAEL023836
LOC110674526	0.5	0.8	1.4	1.9	1.5	1.4	3.2	3.3	4.4	0.1	0.1	0.1	1	0.3	1	AAEL026391
LOC110674527	4.2	3.4	5.4	5.8	9.7	7.2	7.6	5.4	7.9	1.6	1.1	2.1	1.4	1	1	AAEL022952
LOC110674529	3.1	4	5.2	7.9	5.9	3	1.6	4.9	5.3	0.7	0.7	0.6	0.1	0.7	0.8	AAEL021978
LOC110674530	0.6	0	0.9	0.9	1.1	0.4	2	2	1.7	0	0.2	0.4	0.2	0.3	0.1	AAEL022041
LOC110674531	0.1	0	0.2	0.2	0.2	0.1	0.5	0.7	0.6	0.1	0.1	0	0.2	0.1	0.2	AAEL025033
LOC110674532	0	0	0	0.1	0	0	0.1	0.2	0	0	0	0	0	0	0	AAEL027481
LOC110674533	1.8	2.2	2.2	1.6	1.1	0.8	6.8	4.7	8.3	1.8	1.7	1	1.5	0.7	1	AAEL023220
LOC110674534	0.4	0	0.1	0.1	0	0.1	0.4	0.1	0.2	0.1	0	0.1	0.1	0.1	0.2	AAEL027853
LOC110674535	0.2	0.1	0.9	0.1	0.1	0	0.6	1.1	1.1	1	3	0.3	0.3	0	0.6	AAEL023804
LOC110674536	0.5	1.4	0.9	0.6	1.8	0.9	0.7	0.4	0.5	0	0	0	0.1	0.5	0	AAEL026242
LOC110674537	0	0	0	0	0	0.1	0.1	0.3	0.2	0	0	0	0	0	0	AAEL022949
LOC110674538	0	0	0	0	0.1	0	0	0.4	0.2	0	0.1	0	0.4	0.7	0.2	AAEL025628
LOC110674539	0	0	0	0.3	0.2	0.4	0.3	0.4	0.3	0	0	0	0.4	0.5	0.1	AAEL020391
LOC110674540	0	0	0.3	0	0	0	0	0	0	0	0.1	0	0	0	0.1	AAEL024155
LOC110674541	0	0.5	0	0.1	0.1	0.1	0.7	0.1	0.3	0.2	0	0.1	0.1	0.2	0.1	AAEL027773
LOC110674542	0.1	0.3	0.1	0.1	0	0	0.2	0.1	0.2	0	0	0	0	0	0	AAEL024293
LOC110674543	0	0	0	0	0	0	0	0	0	0	0	0	0	0	0	AAEL020866
LOC110674544	0	0	0	0	0	0	0	0	0	0	0	0	0	0	0	AAEL025420
LOC110674545	0.2	0.1	0	0.4	0.3	0.3	3.1	2.2	3	0	0	0	0	0.1	0.1	AAEL020944
LOC110674546	0	0	0.1	0.1	0	0.2	1.9	1.5	2.1	0	0	0	0	0	0	AAEL027297
LOC110674547	0.6	1.1	0.7	0.2	0.3	0.5	0.2	0.1	0.1	0	0	0.1	0.1	0.1	0	AAEL024076
LOC110674548	0.1	0.2	0	0.1	0.1	0.1	0	0.2	0.1	0	0	0	0	0	0	AAEL026484
LOC110674549	0	0.1	0	0.1	0.3	0	0	0	0.2	0.1	0	0	0	0	0	AAEL025407
LOC110674550	0	0	0	0	0	0	0	0.2	0	19.1	21.6	22.1	86.5	69.9	31.3	AAEL022552
LOC110674551	0	0.8	0.7	0.1	0.1	0.2	0.3	0.4	0	0	0	0	0	0	0	AAEL021096
LOC110674552	0.8	0.4	1	0.4	1.3	0.9	2.2	2.9	2.5	0	0.1	0	0.5	0.4	0.4	AAEL025210
LOC110674553	0.7	1.4	0.4	0.6	0.6	0.8	1.1	1.2	0.3	0	0.1	0	0.3	0	0	AAEL020479
LOC110674554	0	0.1	0.1	0.2	0.4	0	0.2	0.2	0.6	0.3	0.1	0	0.4	0.2	0.4	AAEL027761
LOC110674555	1.4	2	0.6	0.8	3.1	1.5	4.7	4.1	2.9	0.2	0.3	0.1	1	0.9	1.2	AAEL025971
LOC110674556	3.8	3.3	5.2	8.4	11.7	13.3	10.2	15.7	13.2	0.1	0.1	0.2	0.4	1.7	0.2	AAEL021833
LOC110674557	0.1	0.1	0.2	0	0	0	0	0	0	0	0	0	0	0	0	AAEL025152
LOC110674558	0.3	0	0.2	1.6	5.4	4.7	0.7	0.2	0.3	0	0	0	0	0	0	AAEL020410
LOC110674559	1.9	2.9	2.1	2	3.3	2	4	4.7	2.1	0.2	0	0	0.2	0	0	AAEL027805
LOC110674560	15.9	23.6	23.7	5.8	10.6	6.5	3.7	2.7	4.1	0	0.1	0.1	0	0	0	AAEL027461
LOC110674561	0.1	0	0	0	0	0.1	0.1	0.1	0.1	0	0	0	0	0	0	AAEL024163
LOC110674562	0.5	1.6	0.6	1	1.1	1.6	2.6	2.5	3.3	0.2	0.1	0.3	0.4	0.3	0.4	AAEL024294
LOC110674563	0.1	0.1	0.1	0.3	0.2	0.2	0.2	0	0.5	0	0	0	0.2	0.2	0.1	AAEL020860
LOC110674564	0	0	0.1	0.1	0.1	0	0.2	0.1	0.4	0	0	0	0.1	0.2	0.2	AAEL025556
LOC110674565	0	0	0	0	0	0	0	0	0.1	0	0	0	0.2	0.3	0	AAEL022871
LOC110674566	0	0	0	0	0	0	0	0	0	0	0	0	0	0.1	0.1	AAEL027237
LOC110674567	0.1	0	0.2	0	0.1	0	0.1	0	0.1	0	0.1	0.1	0.1	0	0	AAEL023784
LOC110674568	0	0	0	0	0	0	0	0	0.1	0	0	0	0	0	0	AAEL024691
LOC110674569	0.5	0.6	0.9	0.8	0.3	0.3	0.3	0.3	0.3	51.6	46.2	47.5	13.6	11.4	16.4	AAEL020789
LOC110674570	0.4	3.2	2.4	1.2	1.5	0.3	0	0.6	0.3	0	0	0.2	0	0	0	AAEL020892
LOC110674571	2.1	0.9	1.4	2	3.3	1.5	2.2	1	2.1	1.6	0.1	1.1	1.1	1	2.5	AAEL026509
LOC110674572	0	0	0	0	0	0	0.4	0.4	0.3	0	0.3	0	0	0	0	AAEL023362
LOC110674574	1.1	1.9	1	0.9	1	0.8	1	0.5	0.7	0.3	0.2	0	0.4	0.5	0.6	AAEL022171
LOC110674575	8.9	9.2	10.1	1.8	0	0.5	0.5	0.2	0.1	0	0.1	0	0	0.1	0.1	AAEL023317
LOC110674576	0	0.2	0.2	0.2	0.2	0	0.5	0	0.2	0.1	0	0	0.3	0.2	0.2	AAEL024754
LOC110674577	0	0	0	0	0.2	0	0	0	0	0	0	0.2	0	0	0	AAEL022377
LOC110674578	0.2	0	0	0.1	0	0	0	0.3	0.1	0.1	0	0	0.1	0	0.2	AAEL028084
LOC110674579	0.1	0	0	0.1	0	0	0	0.2	0.1	0.1	0	0	0	0	0.3	AAEL026065
LOC110674580	0.1	0	0	0	0.1	0.1	0.8	0.7	0.9	0	0	0	0.1	0.1	0	AAEL021630
LOC110674581	0.2	0	0	0	0	0.1	0.2	0	0.5	0	0	0	0	0	0	AAEL023785
LOC110674582	0.4	0.3	0.3	0.6	1.3	0.7	0.7	0.8	1.2	0	0	0	1	1.5	0.1	AAEL020130
LOC110674583	0	0	0	0.1	0.1	0	0.2	0.1	0.3	0.2	0	0	0	0	0.1	AAEL023467
LOC110674584	0	0	0	0.1	0.1	0	0	0.1	0.1	0	0	0	0.1	0	0.1	AAEL027430
LOC110674585	8.1	10.1	11.3	5.3	6.4	9	8.6	7.4	6.5	0.1	0.6	0.5	0.5	0.4	0.6	AAEL025682
LOC110674586	0.5	0.6	0.4	0.2	0.4	0	1.8	1.5	3.4	0.1	0.2	0.1	0.4	0.3	0.3	AAEL020098
LOC110674587	0	0	0	0	0	0	0	0	0	0	0	0	0	0	0	AAEL024590
LOC110674588	0.3	0.1	0.4	0.2	0.7	0.7	1.1	1.2	1.2	0.1	0.2	0.1	0.2	0.1	0	AAEL028204
LOC110674589	0.1	0.1	0.3	0.3	0.7	0.6	0.9	0.8	0.7	0.1	0	0	0	0.1	0.1	AAEL022942
LOC110674590	0	0	0	0	0	0	0.2	0.1	0	0.1	0	0.1	0	0	0	AAEL022903
LOC110674591	0.3	0.1	0	0.1	0.1	0.4	0.2	0.5	0.4	0	0.1	0	0.2	0	0.1	AAEL020930
LOC110674592	0	0	0	0	0	0	0.9	0	0	0.8	0	0	0	0	0	AAEL023770
LOC110674593	2	2.3	2.3	1.2	3.7	2.6	2.5	1.6	2.2	0.1	0.1	0.1	0.1	0.1	0.2	AAEL021990
LOC110674594	0	0	0	0	0	0	0.2	0	0.1	1.8	1.2	1.5	1.5	1.5	0.6	AAEL025487
LOC110674595	0.3	0.7	0.5	0.4	0.5	0.3	0.9	1	0.7	0.2	0.1	0.2	0.8	0.5	1.1	AAEL027464
LOC110674596	19.3	15.4	14.2	4.8	0.8	1.4	1.5	0.8	1.1	0	0.2	0.1	0.2	0.2	0.4	AAEL023831
LOC110674597	0.2	0.7	0.7	0.5	0.6	0.3	1.4	1.1	0.9	0.4	0.1	0.3	0.7	0.9	1.3	AAEL026328
LOC110674598	0	0	0	0	0	0	0.1	0	0.1	1.1	1	0.9	0.9	0.9	0.4	AAEL022885
LOC110674599	0	0	0	0	0	0	0.1	0	0.1	1.1	1	0.9	0.9	0.9	0.4	AAEL021917
LOC110674600	0.4	0.6	1.6	1.1	1	0.8	1	0.8	1.3	0	0.1	0	0.1	0	0	AAEL023383
LOC110674601	0.1	0	0	0	0	0	1	0.8	1.8	0	0	0	0.1	0	0	AAEL027966
LOC110674602	10.9	8.8	10.2	10.4	4.2	5.7	5.3	5.3	4.7	0.4	0.5	0.7	0.7	0.4	0.5	AAEL025119
LOC110674603	2.5	3.8	4.1	3.3	1.5	0.7	0.4	0.4	0.3	0	0	0	0	0.2	0	AAEL021117
LOC110674604	1.9	0.8	0.2	1.6	0.9	1.5	1.5	1	1.4	0.5	1	0.4	1	1.4	0.4	AAEL026157
LOC110674605	0.3	0.9	0.6	0.5	0.6	0.2	0	0.4	0.3	0.4	0.1	0.2	0.3	0	0.2	AAEL026455
LOC110674606	0	0.1	0	0	0	0	0	0	0	0	0	0	0	0	0	AAEL024707
LOC110674607	0.3	0.5	0.7	1.2	1.4	1.8	1.4	0.8	1.6	0.2	0.1	0.1	0	0.2	0.1	AAEL021007
LOC110674608	0.6	0.1	0.2	0.8	1	0.5	1.2	2	1.3	0.3	1.3	0.7	1.3	1.1	1	AAEL024897
LOC110674609	0.9	0.6	1.6	1.2	2.1	2	5.5	4.8	4.2	0.2	0.4	0.3	0.7	0.9	0.6	AAEL021980
LOC110674611	0	0	0	0	0	0	0.1	0.1	0	0	0	0	0	0.1	0	AAEL025602
LOC110674612	0	0	0	0	0	0	0	0	0.2	0	0	0	0.1	0.1	0	AAEL023091
LOC110674613	0.7	0.5	0.2	1.3	1.1	0.5	1.6	1.2	1.7	0.3	0.1	0.3	0.3	0.2	0.1	AAEL026281
LOC110674614	4.6	5.1	2.3	0.8	1.3	1.7	1.9	2	2.2	0.1	0	0.1	0	0.2	0	AAEL023903
LOC110674615	0.3	0.5	0.5	0.2	0.2	0.5	0.7	0.6	0.4	0	0	0	0.1	0.1	0.2	AAEL027373
LOC110674616	1.8	2.9	2.9	5.4	3.9	1.1	13.9	13.3	8.6	1.6	1.5	1.3	3.1	3.4	1.9	AAEL020153
LOC110674618	0.6	0.3	0.8	0.2	0.5	0.4	1.3	1.4	0.8	1.4	1.1	1	1.7	1.9	0.6	AAEL022093
LOC110674619	0	0	0	0.1	0.1	0.1	0	0.1	0	0.1	0.1	0.1	0.6	0.5	0.4	AAEL025609
LOC110674620	0	0	0	0	0	0	0	0	0.6	0	0	0	0	0	0	AAEL021039
LOC110674621	4.5	3.3	4.6	12.4	15.3	11.6	19.5	20.9	23.5	0.3	0.5	0.3	6	5.9	7.4	AAEL027509
LOC110674622	0.2	0.1	0.1	0	0	0	0	0.1	0.1	0	0	0	0	0	0	AAEL025448
LOC110674623	0.5	0.5	0.8	0.3	0.6	0	2.4	3.1	2.2	0.2	0.5	0.2	0.2	0.3	0.3	AAEL021764
LOC110674624	0	0.7	0	0	0.3	0	0	0	0	0.4	0.2	0	0.7	0	0.2	AAEL022395
LOC110674625	0	0	0	0.4	0.1	0	0.2	0	0.2	0	0	0	0	0	0	AAEL026949
LOC110674626	0	0	0.4	0	0.2	0	0	0.5	0.4	0	0	0	0	0	0	AAEL027874
LOC110674627	0.8	0.9	1.1	1.5	2.7	1.4	2.3	2.1	2.5	0.5	1.5	0.7	1.8	1.6	2.5	AAEL023090
LOC110674628	0.1	0.1	0.4	0.4	0.2	0.1	0.1	0.1	0	0	0.2	0.2	0.1	0.1	0.3	AAEL027711
LOC110674629	0.7	1.4	0.6	0.4	0	0.1	0.9	1	0.9	0	0	0	0	0	0.1	AAEL024037
LOC110674630	0.7	2.7	0.8	0.5	0.3	1.1	0.4	0.5	0.4	0.3	0	0	0.9	0.4	0.2	AAEL022158
LOC110674631	0	0	0	0.3	0	0	0.2	0.3	0.2	0	0	0	0	0	0	AAEL021727
LOC110674632	0	0	0.1	0	0	0	0	0.1	0	0	0	0	0	0	0	AAEL026203
LOC110674633	0	0	0.1	0	0	0	0	0.1	0	0	0	0	0	0	0	AAEL025931
LOC110674634	0.2	0	0.1	0	0.1	0.2	0	0.3	0	0	0	0	0.1	0	0.1	AAEL021464
LOC110674635	0.3	0.6	0.7	1.6	2.4	1.5	3.6	4.1	3.3	0.3	2.3	0	0.9	0.1	0.2	AAEL024776
LOC110674636	1	0.9	0.7	0.6	0.3	0.2	0	0	0	0	0	0.1	0	0	0	AAEL028240
LOC110674637	0	0	0	0	0.1	0	0.1	0	0	0	0	0	0	0	0	AAEL023619				GO:0004672,GO:0005524,GO:0006468	protein kinase activity,ATP binding,protein phosphorylation
LOC110674638	0	0.3	0	0.2	0.8	1.5	0.9	2	2.3	0	0	0.3	0	0.3	0	AAEL027051
LOC110674639	29.6	24	30.4	14.4	17.1	19.7	6.3	4.9	5.2	0	0.1	0.1	0.2	0.1	0	AAEL022444
LOC110674640	0	1.1	0.8	0.4	0	0.4	0.5	0.8	0.6	0	0	0	0.2	0	0.2	AAEL020268
LOC110674641	0.3	0	0	0.2	0.2	0.2	0	0	0.2	0	0	0	0	0	0	AAEL024891
LOC110674642	0	0	0	0	0	0	0	0	0	0	0	0	0	0	0	AAEL025802
LOC110674643	0	0.3	0	0	0.5	0	0.4	0.3	0.4	0.5	1.3	0.2	0.4	1.6	0.2	AAEL022009
LOC110674644	0	0	0	0	0	0	0	0	0	0	0	0	0	0	0	AAEL026885
LOC110674645	0.1	0.1	0.1	0.1	0.2	0.1	0	0	0	0	0	0	0	0	0	AAEL023328
LOC110674646	0.2	0.7	0.2	0	0.3	0.1	0.6	0.2	0.2	0	0	0	0.2	0.1	0.1	AAEL022899
LOC110674647	2.7	2.2	4.2	0.2	0.3	0.9	0.3	0.5	0.5	0	0	0	0.1	0.1	0	AAEL027208
LOC110674648	0.6	1.2	1.3	5.5	3.3	3.3	4.5	4.9	6.5	0.6	0	0.1	0.8	0.8	0.6	AAEL024080
LOC110674649	0	0	0	0	0	0	0.2	0	0.2	0	0	0	0	0	0	AAEL020152
LOC110674650	0	0	0	0	0	0	0	0	0	0	0	0	0	0	0	AAEL023754
LOC110674651	0.5	1.6	1.9	2.3	0	1.6	1.6	2.4	2.8	0.3	0	0	0	0	0.4	AAEL027445
LOC110674654	0	0.3	0.1	0.2	0.2	0.9	0.4	0.2	0.5	0	0	0	0.1	0	0	AAEL028130
LOC110674655	0.4	1.2	0.4	1.2	1.7	0.6	0.7	0.4	0.7	0	0	0	0.1	0	0	AAEL023276
LOC110674656	0	0	0.2	0.2	0.3	0	0.1	0.2	0.6	0	0	0	0	0	0.1	AAEL025020
LOC110674657	1.3	2	3.2	6.5	4.7	5.2	4.3	4.5	7.3	0.4	0.2	0.3	1	1.1	0.7	AAEL020520
LOC110674658	1.3	1.1	1	0.2	0.2	0	0.5	1.1	0.8	0	0	0	0.3	0	0.1	AAEL026301
LOC110674659	1.3	2.2	3	0.9	1.4	1.3	0.4	0.2	0.6	0	0	0.4	0	0	0	AAEL021380
LOC110674660	0	0	0	0.1	0.1	0	0.8	0.8	0.3	0.1	0	0.1	0	0	0	AAEL025735
LOC110674661	0	0	0	0	0	0	0	0	0	0	0	0	0	0	0	AAEL021603
LOC110674662	1190.7	1171.1	1202.5	868.7	733.2	869.5	210.5	195.2	150.7	6.9	6.5	5.8	17.9	8.9	14.5	AAEL020106
LOC110674663	2.5	1.3	3.2	3.5	7.2	6.3	2.6	1.1	2.4	8.8	6.6	9.5	6.1	4	7.1	AAEL024608
LOC110674664	0	0	0	0	0	0	0	0	0	0.1	0	0	0	0	0	AAEL023157
LOC110674665	0	0	0.1	0.1	0.2	0.1	0	0.1	0	0	0	0	0.1	0	0	AAEL027496
LOC110674666	0	0	0	0.1	0.1	0.2	2	1.6	2	0	0	0	0	0.1	0.2	AAEL021960
LOC110674667	0.6	0.3	0	0.4	0.5	0.3	0.6	0.7	0.8	0.5	0.2	0.3	0.1	0.1	0.4	AAEL022300
LOC110674668	0.1	0.4	0.4	0.9	1.2	0.3	1.1	1.8	2.1	0.1	0	0	0	0.2	0.3	AAEL020548
LOC110674669	0.2	0.7	0.4	0.4	1	0.3	0.7	0.9	0.7	0	0	0.1	0.5	0.5	0.2	AAEL025243
LOC110674670	0.6	1	1	1.2	1.5	0.6	2.1	0.8	1.4	0.2	0.2	0.3	1	0.8	0.9	AAEL023320
LOC110674671	0.5	0.6	1.6	1.3	1.6	0.7	0.7	0.7	0.6	0.2	0.4	0.2	0.2	0	0	AAEL028157				GO:0003676	nucleic acid binding
LOC110674672	1.3	0.5	1.3	0.5	1.1	0.6	0.4	0.3	0.4	0	0	0	0.1	0.4	0.3	AAEL026926
LOC110674673	28.7	78.6	21.1	0.6	5.4	6.7	11.3	17.9	15.8	0	0	0	0	0	0	AAEL022951				GO:0005515	protein binding
LOC110674674	0.5	0.4	0.7	0.4	0.5	0.4	1.3	1.2	1.6	0.2	0.1	0.3	0.2	0.8	0.5	AAEL027586
LOC110674675	0	0	0	0	0	0	0	0	0	0	0	0	0	0	0	AAEL024118
LOC110674676	0.3	0.2	0.6	0.1	0	0	0.5	0.4	0.4	0	0.1	0	0.4	0	0.5	AAEL020999
LOC110674677	0	0	0.6	0	0	0	0	0	0	0.3	0.2	0.2	1.9	0.8	1.1	AAEL023195
LOC110674678	0	0	0	0	0	0	0	0	0	0.1	0	0	0	0	0	AAEL021672
LOC110674679	0.4	0.4	0.7	0	0.4	0	0.3	0.3	0.4	0	0.2	0.4	0	0	0.2	AAEL024311
LOC110674680	0.2	0	0	0	0.2	0	0.2	0	0.2	0	0.1	0	0	0.2	0.1	AAEL024938
LOC110674681	0.9	0.4	0.6	0.2	0.5	0.7	0.5	0.3	0.7	0	0	0	0	0	0	AAEL027484
LOC110674682	0	0	0	0	0	0	0.1	0.1	0	0	0.1	0	0	0	0.1	AAEL021620
LOC110674683	0	0.1	0.1	0	0	0	0.1	0.1	0	0	0.1	0	0	0.1	0.1	AAEL024310
LOC110674684	0	0.1	0	0	0.3	0.1	0.7	0.6	0.4	0	0	0	0.1	0.1	0	AAEL018003
LOC110674685	0.4	0.2	0	0.4	0.1	1.1	0.6	0.5	0.3	0	0.1	0	0.1	0	0.1	AAEL025241
LOC110674686	3.7	4	1.3	3.7	4.2	2.5	3.8	3.2	2	1.5	0.4	0.5	0.3	0	0.8	AAEL026703
LOC110674687	0.4	1.3	0.6	1.1	0.8	2.6	0.4	0.6	0.2	0	0.4	0.2	0	0.2	0.2	AAEL003257				GO:0036157,GO:0070286	outer dynein arm,axonemal dynein complex assembly
LOC110674688	0.2	0.6	0.2	0.1	0.4	0.2	0.3	0.5	0.5	0.1	0.1	0.1	0.2	0.2	0.1	AAEL025793
LOC110674689	0.6	0.3	0.1	0.2	0.5	0.8	0.6	1	0.9	0	0	0	0.1	0	0.1	AAEL023145
LOC110674690	0	0	0	0	0.1	0	0	0	0	0	0	0	0	0.1	0	AAEL024377				GO:0005515	protein binding
LOC110674691	90	18.6	69.1	273	328.5	163.9	1102.3	1044.3	1233.4	0.1	0.1	0.3	0.3	0	0.3	AAEL020715
LOC110674692	0	0	0	0.8	0	0	0	0	0	0	0	0	0	0	0	AAEL023033
LOC110674693	3.3	6.7	7.5	2.1	2	1.3	4.9	6.2	4.4	0.4	0.3	0.4	0.5	0.7	0.7	AAEL021768
LOC110674694	1.3	0.7	1.3	4	16.7	16.6	2.8	3.9	3	0.1	0	0.1	0	0	0	AAEL024209
LOC110674695	0	0	0	0	0	0	0	0	0	0	0	0	0	0	0	AAEL020607				GO:0000786,GO:0003677,GO:0046982	nucleosome,DNA binding,protein heterodimerization activity
LOC110674696	2.4	1.9	1.3	3.4	3.6	1.8	5.4	3.9	4.9	0.7	1.7	1	0.2	0.3	0.1	AAEL020622
LOC110674697	0.4	0.3	0.4	0.1	0.7	0.3	1.2	1.2	1.1	0	0	0	0.1	0.1	0.1	AAEL027635
LOC110674698	0	0.1	0	0.4	0.4	0.1	0.5	0.4	0.2	0	0	0	0.2	0.1	0	AAEL024041
LOC110674699	6.1	7	4.1	2.5	6.9	8	3.4	2.1	1.8	0	0	0.3	0	0.2	0.1	AAEL026656
LOC110674700	0.2	0	0	0.5	0.1	0.6	1	0.4	0.8	0.1	0.2	0.3	0.2	0.1	0.1	AAEL025307
LOC110674701	0.1	0.2	0.1	1.4	1.6	1.7	5.3	5.7	5	0.4	0.5	0.4	0.2	0.1	0.3	AAEL020732
LOC110674702	0	0	0	0	0	0	0	0	0	0	0	0	0	0	0	AAEL025891
LOC110674703	1.5	1.8	1.6	2	2.6	1.1	4.5	5.3	4.3	0.2	0.1	0.1	0.5	0.9	0.7	AAEL021236
LOC110674704	0	0	0	0	0	0	0	0.1	0	0	0	0	0	0	0	AAEL023035				GO:0000786,GO:0003677,GO:0046982	nucleosome,DNA binding,protein heterodimerization activity
LOC110674705	0	0	0	0	0	0	0	0	0	0	0	0	0	0	0	AAEL026472
LOC110674706	0	0	0	0.4	0.4	0	1.4	0.8	1	0.6	1.2	0.7	2.1	2.2	0.3	AAEL021681
LOC110674707	0.5	0.4	0.8	0.1	0.2	0.2	0.7	1.2	0.5	0.7	1.5	1	0.2	1	0.4	AAEL025387
LOC110674708	4.4	4.9	3.5	4	3.1	2.5	2.7	4.5	4	0.3	0.2	0.1	0.4	0.4	0.3	AAEL027035				GO:0003677,GO:0003700,GO:0006355,GO:0043565,GO:0045944	DNA binding,DNA-binding transcription factor activity,regulation of transcription, DNA-templated,sequence-specific DNA binding,positive regulation of transcription by RNA polymerase II
LOC110674709	6.7	8.7	7.5	4.8	6.8	6.8	6.2	6.8	5.4	2.4	2.3	2.6	7.9	8.5	6.4	AAEL022538	Putative bisphosphate 3'-nucleotidase bpnt1/inositol polyphosphate 1-phosphatase [Source:UniProtKB/TrEMBL;Acc:A0A0P6IYC3]			GO:0046854,GO:0046855	phosphatidylinositol phosphorylation,inositol phosphate dephosphorylation
LOC110674710	5.4	6.3	6.4	4.7	3.3	3.1	1.7	1.9	1.6	0.5	0.7	0.4	1.2	1	0.8	AAEL025548
LOC110674711	0.5	0.5	0.7	0.2	0.5	0.7	0.3	0.2	0	0	0	0	0.1	0	0	AAEL021855
LOC110674712	0.1	0.1	0.1	0.2	0.3	0.1	0.2	0.2	0.2	0.3	0.2	0.3	0.9	0.7	0.6	AAEL025713
LOC110674713	0	0	0	0	0	0	0	0	0	0.1	0.1	0.1	0.5	0.4	0.3	AAEL026394
LOC110674714	0	0.5	0	0	0	0	0	0	0	0	0	0	0	0	0	AAEL023318
LOC110674715	16.6	17	15.3	13.9	12	13.9	18.2	18.1	18.2	4	2.9	3.4	5	4.8	5.5	AAEL027748
LOC110674716	1.9	2.9	1.4	1.9	2.3	2	4.4	4.3	2.8	0.2	0	0	0.2	0	0.2	AAEL020295
LOC110674717	2.4	2.1	0.6	0.6	1.5	2.4	1.3	0.3	1	0	0.4	0.1	0.2	0	0.5	AAEL025124
LOC110674718	1.4	1.3	1.6	0.9	1.6	0.8	3.1	3	2.5	32.4	30.2	21.6	15.1	18.6	18.6	AAEL020230
LOC110674719	0	0.2	0	0	0	0	0.1	0	0.1	0	0.1	0	0.1	0.1	0.1	AAEL024873
LOC110674720	0	0	0	0	0	0	0	0	0	0	0	0	0	0	0	AAEL021226
LOC110674721	0.2	0.3	0.2	0.1	0.4	0.2	0.7	0.3	0.7	0	0.2	0	0	0	0	AAEL025726
LOC110674722	0.1	0	0.3	0.1	0.4	0.2	0.3	0.4	0.2	0.2	0.6	0.3	0.3	0.7	0.7	AAEL022464
LOC110674723	6.7	7.4	6.5	2.4	6.7	6.4	2.8	2.2	1.6	0.1	0.1	0.2	0	0.1	0	AAEL027070
LOC110674724	1.6	3.1	2.3	2	0.4	1.3	0.4	0.9	0.7	0.1	0.1	0	0.3	0.2	0.1	AAEL023568
LOC110674725	0.8	2.4	2	2	4.4	3.8	2.2	2.3	2.6	0.1	1.1	0.2	0.9	2.2	0.3	AAEL028222
LOC110674726	0.2	0.1	0.2	0.1	0.3	0.1	0.5	0.7	0.5	0.8	0.6	1.7	0.7	0.5	0.3	AAEL023562
LOC110674727	2.4	4.1	4.1	1.6	2.3	0.9	2.5	2.6	3.1	0.2	0.7	0.5	1.9	2.3	2.7	AAEL028219
LOC110674728	0.1	0	0.1	0	0	0	0.1	0.2	0	1.4	0.9	1	1.6	1.9	0.9	AAEL024733
LOC110674729	0	0	0	0	0	0	0	0	0	0	0	0	0	0	0.6	AAEL021157
LOC110674730	0	0	0	0	0	0	0	0.1	0	0	0	0	0	0	0	AAEL024531
LOC110674731	0.1	0.1	0	0.1	0	0	0	0.1	0.5	25.7	25.5	14.5	16.8	8.5	10.4
LOC110674732	24.8	43.9	46.4	18.1	27.9	12.4	45.2	52	48.4	10	9.2	10.6	15.2	15.3	18.1	AAEL025436
LOC110674733	0	0	0.2	0.2	0.2	0.4	0.1	0.3	0.2	0.1	0.1	0	0	0	0.1	AAEL022943
LOC110674734	0.1	0.2	0.8	0.5	0.6	0.2	0.9	0.8	0.9	0	0	0	0	0.1	0.2	AAEL026500
LOC110674735	0.3	0.3	0.3	0.8	3.1	0.2	0.6	0.4	0.9	7.4	5.8	6.7	3.6	2.5	3	AAEL024086				GO:0003677,GO:0006355	DNA binding,regulation of transcription, DNA-templated
LOC110674736	4.4	7.4	6.1	4	1.8	3.2	1.7	3	2.4	0.8	0.5	0.7	3.6	3.4	2.2	AAEL027542
LOC110674737	0.4	0.4	0.5	0.2	0.3	0.3	0.1	0.3	0.5	0.1	0.4	0.2	0.1	0	0.2	AAEL025623
LOC110674738	0	0.2	0.2	0.2	0.2	0.2	0.1	0.2	0.3	0	0.3	0.1	0.3	0.5	0.3	AAEL022760
LOC110674739	45.2	40.8	47.1	32.3	32.6	31.7	36.8	32.7	36.2	3.4	3.7	2.6	8.1	5.1	7.7	AAEL026468				GO:0003677,GO:0006351,GO:0042025	DNA binding,transcription, DNA-templated,host cell nucleus
LOC110674740	0	0.1	0	0.1	0	0.2	0	0	0	0	0	0	0	0.1	0	AAEL024855
LOC110674741	0	0	0	0	0	0	0.1	0.1	0.1	0.2	0.4	0.2	0.2	0.3	0.5	AAEL023649
LOC110674742	0.7	0.6	0.8	1.4	0.9	1.2	0.7	0.9	0.6	0.7	0.6	0.3	0.4	0.1	0.5	AAEL028030
LOC110674743	0.6	2.2	1.9	1.8	2.4	2.5	2.2	2.1	2.2	0.1	0.2	0.2	0.4	0.4	0.8	AAEL022777
LOC110674744	0	0.1	0.1	0.2	0	0	0.1	0.2	0	0.1	0.1	0	0	0.1	0	AAEL027128				GO:0003677	DNA binding
LOC110674745	11.3	9.3	13.4	13.5	7.9	7.8	4.2	4.8	4.8	19.9	32.1	88.5	133.6	443.3	155.7	AAEL017987
LOC110674746	0.1	0	0	0.1	0.1	0.3	0.6	0.2	0.4	0	0	0	0.1	0	0	AAEL020058
LOC110674747	5.9	8.6	7.6	9.7	12.1	8.9	6.7	7.8	7.6	0.9	2.3	2	5.4	6.9	5.1	AAEL028085
LOC110674748	0.2	0	0.7	0.5	1.3	0.6	3.8	3.8	3	0.1	0.3	0.3	1	1	1	AAEL022586
LOC110674749	305.9	235	315.2	264	201.3	299.1	84.4	85.9	71.2	56.3	58.3	50.4	19.1	29	20.5	AAEL027190
LOC110674750	1.4	1.8	1.8	1.4	1.4	1.4	1.4	2.9	1.2	0.2	0.2	0.2	0	0.2	0	AAEL020939
LOC110674751	0.7	0.9	0.7	2.3	1.7	1	1.6	2.2	2.3	0.4	0.2	0.8	1.3	0.8	0.4	AAEL021597
LOC110674752	0.6	0.6	0.6	0.3	0.4	0.5	0.3	0.3	0.2	0	0.1	0	0	0	0	AAEL024194
LOC110674753	0.3	0.5	0.2	0.1	0.2	0.1	0.5	0.8	0.6	0	0	0	0	0	0	AAEL026599
LOC110674754	0.2	1.1	0.8	0.6	0	0	0.3	0.1	0.5	0	0	0	0	0	0	AAEL020868
LOC110674755	0.6	1.3	0.9	0.7	0.9	0.5	2.8	2.9	2.6	0.3	0.5	0.4	0.9	0.9	0.9	AAEL027428
LOC110674756	0	0	0	0	0	0	0	0	0	0	0	0	0	0	0	AAEL021770
LOC110674757	1.3	1.4	1.2	1.2	1	0.5	1.4	1.3	1.5	0.1	0.2	0.1	0.7	0.3	0.3	AAEL024248
LOC110674758	2.3	3	3.1	0.5	0.2	1	0.3	0.2	0.3	0	0.1	0.1	0.1	0	0	AAEL026699
LOC110674759	0.9	1	0.4	0.2	0.9	1.1	0.2	0.3	0.1	0	0.1	0.1	0	0	0	AAEL023136
LOC110674760	265.3	270.1	279.7	192.1	185.9	200.9	229.1	234.6	234.1	11.3	10.3	11.1	50.1	39.1	61.6	AAEL021736	Enhancer of rudimentary homolog [Source:UniProtKB/Swiss-Prot;Acc:Q93104]			GO:0006221,GO:0007049,GO:0045747	pyrimidine nucleotide biosynthetic process,cell cycle,positive regulation of Notch signaling pathway
LOC110674761	1.2	1.2	1.2	1.5	3.2	1.5	7.7	6.5	6.4	2.8	2.6	2.8	2.5	3.4	3.9	AAEL024258
LOC110674762	3.8	7.4	5.5	5	3.5	2.6	11.7	7.4	9.1	1.2	1.4	0.9	4.8	2.7	3.9	AAEL022710
LOC110674763	1.3	1.3	1	0.2	0.2	0.3	0.8	0.7	0.6	0	0	0	0	0	0	AAEL018005				GO:0046872	metal ion binding
LOC110674764	34.5	34.8	33.8	15.4	17.4	17.2	8.4	10.3	9.2	0.1	0	0.2	0.1	0.2	0	AAEL024049
LOC110674765	0.3	0	0.1	0.2	0.1	0.1	1.3	1.3	1.2	0.4	0.4	0.6	0.4	1.1	0.6	AAEL026649				GO:0003676,GO:0003677	nucleic acid binding,DNA binding
LOC110674766	19.7	19	21.7	11.6	11.4	10	3.6	5.5	3.4	1.5	2.2	1.3	3.5	4.4	3.6	AAEL024429				GO:0003676	nucleic acid binding
LOC110674767	0.3	0.2	0.2	1.2	0.4	0.5	0.8	1.1	1.5	0.2	0.2	0.3	0.3	0.4	0.6	AAEL027538
LOC110674768	0.1	0	0	0	0	0	0	0	0	0	0	0	0	0	0	AAEL025291
LOC110674769	0	0	0	0	0	0	0	0	0.1	0	0	0	0.1	0	0.2	AAEL021719
LOC110674770	0	0.4	0	0.1	0	0	0.4	0	0.4	1.1	1.6	1.6	1.4	0.6	0.6	AAEL022275
LOC110674771	3.7	2.7	4	1.1	0.3	0.3	1.8	3.2	2.4	0.2	0.1	0	0.3	0.4	0.3	AAEL026743
LOC110674772	38.2	32.3	38.3	30.9	21.6	28.8	23.7	24.8	20	8.3	8.2	8.4	9.9	8.5	10.3	AAEL021318				GO:0005515	protein binding
LOC110674773	0.8	0.6	0.6	0.9	0.7	0.9	0.7	0.6	0.7	0.1	0	0.1	0.1	0.3	0.2	AAEL019943				GO:0000166,GO:0003676,GO:0004386,GO:0005524	nucleotide binding,nucleic acid binding,helicase activity,ATP binding
LOC110674774	7.4	7.2	9.4	28.1	32.2	17.4	34	38.3	32.6	1.4	1.8	0.4	5.9	5.5	3.5	AAEL020454
LOC110674775	23.7	32.4	25.6	16.1	16.4	16.2	36.2	36.2	30.3	3.4	4.5	4	8.8	8.6	8.7
LOC110674776	0	0	0	0	0.2	0.2	0.3	0.8	2.5	3	10.1	1.6	6.5	12.9	18.6	AAEL026955
LOC110674777	1.1	1.6	1.4	1.4	1.2	0.9	2.4	2.5	1.5	0.1	0	0.2	0	0	0	AAEL022315
LOC110674778	0.1	0	0	0.3	0.2	0.1	1.6	1.4	2.1	0.1	0	0	0.4	0	0.2	AAEL027848
LOC110674779	0.8	1.8	1.1	1.6	1.9	1.4	2.2	3	2.1	0.1	0	0.1	0.1	0.1	0.2	AAEL023238
LOC110674780	0.6	0.3	0.5	0.2	0.4	0.4	0.1	0.1	0.2	0	0.1	0	0.1	0	0	AAEL022108
LOC110674781	0	0	0	1.1	2.2	3.1	2.3	3.5	7.1	4.9	2.4	1.6	6.7	3.7	11.8	AAEL024472
LOC110674782	0	0	0.1	0	0.1	0	0.4	0.4	0.4	4.3	5.6	5.2	5.7	7.2	5.8	AAEL025637
LOC110674783	0	0	0.1	0	0	0.4	0.2	0.4	0.1	0	0	0	0	0	0.1	AAEL022083
LOC110674784	0.2	0.2	0.3	0.6	0	0	0.9	1.8	1.7	1.1	1	1.3	0	0	0.1	AAEL023705
LOC110674785	30.3	7.8	26.7	2.5	13.3	32.5	3.6	6.1	1.8	0	0	0	0	0	0	AAEL026246				GO:0003676	nucleic acid binding
LOC110674786	2.5	2.8	1.1	2.3	3.6	3.1	2	1.1	2.2	0	0.1	0.4	0.3	0.6	0.3	AAEL027257
LOC110674787	0.5	1.1	1.9	2.5	0.8	0.8	2.5	2.3	3.6	0.3	0.3	0	0.7	0.1	0.5	AAEL023940
LOC110674788	0.3	0.1	0.5	0.2	0.2	0	0.3	0	0.1	0	0	0	0	0	0	AAEL024606
LOC110674789	0.7	0.1	0.2	0.4	0.5	0.1	1.1	0.8	0.8	0.3	0.4	0.1	53.2	543	252.8	AAEL021022
LOC110674790	0	0.3	0.3	0.5	0.7	0.4	1.7	2.3	1.5	0	0.2	0.1	0.4	0.3	0.2	AAEL025863
LOC110674791	2.9	2.5	1.3	0.6	0.3	0.5	0.3	0.1	0.1	0	0	0	0	0	0	AAEL021254
LOC110674792	0	0	0.2	0	0.2	0	1.2	1.3	1.1	0.8	0.6	1.2	1.9	1.5	1.1	AAEL024997				GO:0003677	DNA binding
LOC110674793	0.5	0.2	0.5	0.6	0.8	0.7	2.3	2.7	1.9	2.5	1.5	1.4	3.8	2.1	3.5	AAEL028091
LOC110674794	0.3	0.2	0.1	0	0	0.1	0.1	0.2	0.1	0	0	0	0	0	0.1	AAEL023598				GO:0004803,GO:0006313	transposase activity,transposition, DNA-mediated
LOC110674795	23.9	30.9	24.5	20.7	21.6	16.9	10.9	10.8	9.6	2.3	1.4	2.8	9	9.6	7.3	AAEL027287				GO:0005759,GO:0006974,GO:1902445	mitochondrial matrix,cellular response to DNA damage stimulus,regulation of mitochondrial membrane permeability involved in programmed necrotic cell death
LOC110674796	104.7	105.9	104.3	94.7	94.3	78.6	97.7	88.2	99.6	50.5	65.9	57.2	66.4	71.7	52.2	AAEL022712				GO:0005840,GO:0006412	ribosome,translation
LOC110674797	27.7	27.2	29.1	34.3	27.1	24.3	13.7	12.1	12.7	6.2	5	4.3	3.2	3.5	3.6	AAEL026758
LOC110674798	2.4	2	1.3	0	0.2	0.5	0.7	0.7	0.2	0	0	0	0	0	0	AAEL022119
LOC110674799	0	0.1	0	0	0.1	0	0.3	0.1	0.1	0	0	0	0	0	0	AAEL025601
LOC110674800	0	0.1	0	0.1	0.1	0	0.4	0.9	0.5	0.2	0.3	0.2	0.6	1.1	0.5	AAEL025449
LOC110674801	41.3	41.7	35.9	26.2	34.8	31.4	44	44.1	45	11.5	10.5	12.6	11.8	8.9	15.1	AAEL022060
LOC110674802	0.6	0.9	0.7	0.2	0.2	0	0.2	0.2	0.2	0.1	0.3	0.2	0.7	0.7	0.7	AAEL022233
LOC110674803	1.1	1.8	1.2	0.3	0.7	0.1	0.9	0.4	1.1	0	0.2	0.4	0.6	1	0.6	AAEL026728
LOC110674804	1.6	2.5	3.4	2.8	2.6	2.6	1.2	2	1.4	0.1	0	0.2	0.1	0.1	0.5	AAEL020161
LOC110674805	2.9	2.7	3.1	3.4	2.6	2.2	1.4	1.6	1.6	0.1	0	0	0.1	0.2	0.5	AAEL024933
LOC110674806	0.4	1.3	0.5	0.4	0.2	0.1	0.5	0.4	0.5	0	0	0	0.1	0	0.2	AAEL021078
LOC110674807	0.3	1.3	0.5	0.4	0.2	0.1	0.5	0.4	0.5	0	0	0	0.1	0	0.1	AAEL025780
LOC110674808	30.8	30.7	27.2	10.2	13.9	13	10.6	11.4	7.7	6.9	5.9	8.1	18.7	13.5	22.8	AAEL022090
LOC110674809	0.1	0.2	0.2	0	0.1	0.1	0.3	0.3	0.1	0	0.1	0	0.1	0.1	0.1	AAEL022440
LOC110674810	10.3	11.2	9.9	5.5	6.8	9.5	5.3	5.5	5.1	0.3	0.4	0.2	0.3	0.3	0.4	AAEL023630
LOC110674811	11.6	8.5	12.4	5	8.6	10.7	9.5	8.3	9.6	1.8	1.2	0.9	4.2	4.4	5.6	AAEL028126
LOC110674812	0.4	0.5	0.4	1.5	0.7	0.3	0.9	1	0.9	0.5	0.6	0.6	0.3	0.4	0.6	AAEL024769
LOC110674813	32.2	31.6	30.4	22.4	18.6	15.1	45.3	44.1	43.3	14.2	14	12.7	12.7	10.1	15	AAEL021103				GO:0005634	nucleus
LOC110674814	0.3	0.2	0.3	0.5	0.1	0.2	1	0.8	0.8	22.8	19.5	17.1	21.2	30	17.5	AAEL023395
LOC110674815	6.2	3.6	6	2.2	2.8	2.3	4.9	3.8	4.4	11.9	12.2	12.8	12.3	12.4	10.7	AAEL026819
LOC110674816	0.2	0.2	0.2	0.4	0.3	0.9	0.3	0.2	0.6	0	0	0	0	0.1	0	AAEL025035
LOC110674817	0	0	0	0	0	0	0	0	0	0	0	0	0	0	0	AAEL020321
LOC110674818	0	0.4	0.2	0	0	0	0.2	0	0.1	0	0	0	0	0	0	AAEL021121
LOC110674819	0.3	0	0	0	0.1	0.1	0	0	0	0.9	1.3	0.6	1.6	1.3	0.7	AAEL024862
LOC110674820	0.1	0.1	0.2	0.1	0.1	0	0.2	0	0.1	0	0.1	0	0	0.1	0.2	AAEL024804
LOC110674821	6.5	6.3	9.7	10.2	1.8	8	1.3	0.8	0.9	0	0	0	0	0	0	AAEL020190
LOC110674822	6.3	6.3	9.5	10.1	1.9	8	1.2	0.8	0.9	0	0	0	0	0	0	AAEL025892
LOC110674823	41.4	30.6	41.3	61.5	54.6	44.6	140.1	139.4	163.2	11.8	11.7	12.2	82.8	70.1	56.4	AAEL021179				GO:0006144,GO:0033971	purine nucleobase metabolic process,hydroxyisourate hydrolase activity
LOC110674824	1.5	2.7	4.1	2.2	2.3	2.8	2.3	2.1	2.5	0.7	0.9	0.5	1	1.2	1.1	AAEL027083
LOC110674825	1	1.1	0.9	0.2	0.5	0.2	0.3	0.2	0.5	0	0	0	0	0.1	0.1	AAEL022448
LOC110674826	0	0	0.1	0.2	0	0	0	0.1	0.6	0	0	0.2	0	0.2	0.1	AAEL028232
LOC110674827	0.1	0.1	0.4	0.3	0.2	0.1	0.2	0.2	0.1	0.4	0.6	0.5	0.6	0.5	0.5	AAEL014853	otoferlin [Source:VB Community Annotation]			GO:0005509,GO:0016021,GO:0016079	calcium ion binding,integral component of membrane,synaptic vesicle exocytosis
LOC110674828	0	0	0.1	0.3	0	0	0.1	0	0	0.1	0	0	0	0	0	AAEL026305
LOC110674829	0.1	0.3	0.2	0.2	0.3	0.5	1.6	2.4	1.9	0.1	0.1	0.1	0.4	0.1	0.2	AAEL022862
LOC110674830	0.5	0.5	0.3	1.1	0.8	1.1	0.7	0.6	0.9	0.9	0.6	0.9	1	1	0.6	AAEL021231				GO:0003924,GO:0005525	GTPase activity,GTP binding
LOC110674831	0.2	0	0.1	0.4	0.6	0.2	0.2	0.2	0.6	0.4	0.2	0.1	0.1	0.1	0.2	AAEL026915				GO:0004553,GO:0005975	hydrolase activity, hydrolyzing O-glycosyl compounds,carbohydrate metabolic process
LOC110674832	0	0.3	0	0.5	0.5	0.3	0	0	0.6	0	0.3	0.2	0	0.2	0	AAEL022638	Putative 14.5 kDa salivary protein [Source:UniProtKB/TrEMBL;Acc:Q1HRF3]
LOC110674833	7.4	14.1	7.6	7.6	8.9	5.3	11.6	12.9	10.6	6.6	6.7	6.3	17.6	17.2	16.7	AAEL028087
LOC110674834	42.2	48.7	47.1	28.6	21.5	18.1	27.6	29.7	29.9	2.9	2.8	2.5	4.9	3.4	4.2	AAEL028129	Nuclear transcription factor Y subunit gamma [Source:UniProtKB/TrEMBL;Acc:A0A0P6K0W4]			GO:0000786,GO:0003677,GO:0003700,GO:0006355,GO:0016602,GO:0046982	nucleosome,DNA binding,DNA-binding transcription factor activity,regulation of transcription, DNA-templated,CCAAT-binding factor complex,protein heterodimerization activity
LOC110674835	1.1	3.6	2.2	1	1.2	0.9	1.9	2.7	2.2	0	0	0	0.3	0.1	0.1	AAEL023628
LOC110674836	15.1	66.8	18.1	0.8	2.8	0.6	16.6	21.6	14.5	2.6	2.8	2.3	4.6	4	6.3	AAEL020033				GO:0003676	nucleic acid binding
LOC110674837	1.4	1.9	1.6	0.5	0.9	1.3	0.9	0.9	0.5	0.4	0.6	0.5	0.8	1	0.3	AAEL025763
LOC110674838	0.5	0.4	0.3	0.2	0.3	0.2	1	1.4	1.1	0.1	0.2	0.1	0.5	0.6	0.8	AAEL028002				GO:0003677,GO:0006355	DNA binding,regulation of transcription, DNA-templated
LOC110674839	23.2	23	21.6	9.7	12.4	10.2	19.2	18.8	18.7	2.2	2.5	3.6	10.2	10.8	12	AAEL022443				GO:0004672,GO:0005524,GO:0006468,GO:0006914,GO:0016301,GO:0016310	protein kinase activity,ATP binding,protein phosphorylation,autophagy,kinase activity,phosphorylation
LOC110674840	0	0	0.1	0	0	0	0.6	0.8	0.8	0	0	0.1	0.3	0.2	0.2	AAEL021654
LOC110674841	2.8	3.7	6.2	1.4	1.5	3.4	1.6	0.7	0.5	0	0	0	0	0	0	AAEL025315
LOC110674842	0.3	0.1	0	0.2	0.2	0.1	0	0	0.2	0	0	0	0.1	0	0	AAEL027112
LOC110674843	0.4	3.8	0.5	0	0	0	0.5	0.9	0.7	1.3	0.7	1.7	5	4.2	3.3	AAEL022603
LOC110674844	0	0	0	0	0	0	0	0	0	0.1	0.3	0.2	0	0	0.5	AAEL022481
LOC110674845	0	0.1	0	0	0	0	0	0	0	0.1	0.4	0.1	0.4	0.2	0.5	AAEL028024
LOC110674846	0	0.2	0.1	0.2	0	0.1	0	0.2	0.1	0	0	0.1	0.3	0.1	0.4	AAEL023663
LOC110674847	0	0.2	0.2	2.7	0.2	0.9	0	0	0	0	0	0	0	0	0	AAEL025107
LOC110674848	2.9	12.2	2.7	2.5	1.8	2	0.5	0.8	0.5	0.2	0.4	0.2	1.9	0.9	1	AAEL024777				GO:0005515	protein binding
LOC110674849	0.2	2.4	0.4	0.1	0	0	0	0	0	1.2	1.8	1.5	5.9	2.6	4.9	AAEL020094
LOC110674850	0.1	0.2	0.1	0.1	0	0	0	0	0	0.4	1.4	0.5	0.7	0.5	1	AAEL023728				GO:0005515	protein binding
LOC110674851	0	0.1	0	0	0	0	0	0	0	0.2	0.6	0.3	1.5	0.8	0.9	AAEL027338				GO:0005515	protein binding
LOC110674852	0	0	0	0	0	0	0	0	0	0.3	1.1	0.3	0.7	0.5	0.7	AAEL021467				GO:0005515	protein binding
LOC110674853	0.1	0.1	0.1	0	0.1	0	0	0	0	0.3	0.8	0.3	0.1	0.4	0.5	AAEL025085				GO:0005515	protein binding
LOC110674854	0	0.1	0	0.1	0	0	0.1	0	0	0	0	0	0	0	0	AAEL024103				GO:0004519,GO:0090305	endonuclease activity,nucleic acid phosphodiester bond hydrolysis
LOC110674855	0.1	0.2	0.1	0.1	0	0	0	0	0	0.2	0.6	0.2	1.5	0.8	1.4	AAEL026630				GO:0005515	protein binding
LOC110674856	0	0	0	0	0	0	0	0	0	0.9	3.4	1	1	0.8	0.6	AAEL020086
LOC110674857	0	0	0	0	0	0	0	0	0	0.1	0.8	0.1	1.4	0.5	0.6	AAEL024822
LOC110674858	0	0	0	0	0	0	0	0	0	1.2	4.6	1.2	1.4	1	1	AAEL021747
LOC110674859	0	0	0.1	0	0	0	0	0	0	1.4	2.4	1	1.4	0.6	1.6	AAEL024403
LOC110674860	0	0	0.1	0.1	0.5	0.6	0	0.1	0	19.1	11.4	25.5	45.1	78.3	32.2	AAEL027311
LOC110674861	0.7	2.7	0.5	0	0.1	0	0.1	0.1	0	0.1	0.2	0	5.2	25.4	29.3	AAEL022681
LOC110674862	48.3	49	49.2	50	22.4	35.1	23.9	27.2	19.2	9.8	11	9.2	13	14.6	14	AAEL020203				GO:0005515,GO:0008013,GO:0016055,GO:0030178	protein binding,beta-catenin binding,Wnt signaling pathway,negative regulation of Wnt signaling pathway
LOC110674863	0.7	0.9	0.7	1	1.1	0.8	1.2	1.1	1	0.1	0.1	0.3	0	0	0	AAEL023806
LOC110674864	1.5	2.3	1.7	1.7	0.2	0.2	0.4	0.4	0.4	1	0.5	0.4	0.7	0.4	0.5	AAEL020864
LOC110674865	0.1	0.2	0.1	0	0.2	0	0.1	0.1	0.2	0.1	0	0	0	0	0.1	AAEL024431
LOC110674866	0.3	0.2	0.3	0.2	0.1	0.1	0.5	1.2	0.3	0.1	0.6	0	0.4	0.6	0.8	AAEL022389
LOC110674867	0.1	0	0.1	0	0	0	0	0	0	0	0	0	0	0	0	AAEL025506
LOC110674868	0.1	0	0.1	0	0	0	0	0	0	0	0	0	0	0	0	AAEL025090
LOC110674869	0	0	0	0	0	0	0	0	0	0	0	0	0	0	0	AAEL020503
LOC110674870	0	0	0	0.2	0.2	0.1	0.2	0.4	0.1	0.2	0.2	0.2	0.1	0.3	0.3	AAEL025184
LOC110674871	0.8	1.9	0.7	0.4	0.3	0.2	0.1	0.2	0	0	0	0	0	0	0	AAEL021514
LOC110674872	0	0	0	0	0	0	0.2	0.3	0.3	0	0.5	0	0.2	0.7	0.5	AAEL028131
LOC110674873	40.7	34.6	35.8	17.1	15.6	17.4	9.8	9.7	7.7	10.7	9	9.4	5.1	6.4	3.7	AAEL023750
LOC110674874	0.2	0.6	0.4	0.4	0.3	0.1	0.9	1.3	0.7	0	0.3	0	0.4	0.4	0.5	AAEL022336
LOC110674875	0.5	2.2	1	0.2	0.7	0.4	0.3	0.3	0.2	0	0.4	0	0.3	0.5	0.3	AAEL026742
LOC110674876	0	0	0	0	0	0	0	0	0	0	0	0	0	0	0	AAEL025493
LOC110674877	0	0	0	0	0	0.2	0	0	0	0.3	0.3	0.3	0.9	0.6	1.2	AAEL021973
LOC110674878	0.2	0.1	0.3	0.9	1.5	0.7	1	1.4	1.2	0.8	0.2	0.6	0.1	0.2	0.1	AAEL025943
LOC110674879	0	0	0	0	0	0	0	0	0	0	0	0.2	0	0	0	AAEL021412
LOC110674880	30.2	31.5	27.8	19	18.4	21.9	6.7	6.1	6.8	0.8	0.8	0.9	2.3	0.6	2	AAEL024432
LOC110674881	2.5	2	2.6	5.9	9.5	7.4	6.8	6.4	7.5	2.5	2.2	2.7	3	2	3	AAEL021234
LOC110674882	44.1	48.6	43.7	29	28.8	34.8	10.2	9.7	10.5	1.2	1.3	1.3	3.2	1.1	3.2	AAEL023911
LOC110674883	0	0.1	0	0	0	0	0	0	0	0	0	0	0	0	0	AAEL020065
LOC110675039	0.2	0.5	0.2	0.1	0.2	0	0.3	0.2	0.3	0.1	0	0.1	0.3	0.2	0.1	AAEL026026
LOC110675050	0.2	0.3	0.1	0.1	0.1	0	0.1	0.2	0.2	0	0	0.1	0.1	0.1	0.1	AAEL028245
LOC110675094	6.3	5.6	8.5	12.9	6.9	7.9	6.5	6.9	5	0.6	1.4	0.6	0.3	0.2	0.7	AAEL027725
LOC110675095	1.1	1.2	1	1.3	2.6	1.7	0.9	0.4	0.8	0	0	0.1	0.1	0	0.1	AAEL023772
LOC110675096	0.2	0.2	0.1	0.1	0.8	0.1	0.7	0.5	0.8	0	0	0.1	0.2	0.1	0	AAEL021884
LOC110675097	0	0	0	0	0	0.1	0	0	0	0.1	0.1	0.2	0.1	0	0.1	AAEL026557
LOC110675098	0	0	0.1	0	0	0	0	0	0	0	0	0	0	0	0	AAEL021295
LOC110675099	4.8	3.4	4.3	1.6	2.1	1.3	0.6	0.5	0.1	0	0	0	0.4	0.1	0.1	AAEL025864
LOC110675100	1.1	0.8	1.3	0.6	1.4	0.7	6.6	6.5	5.5	0	0.1	0	0.2	0.3	0	AAEL020567
LOC110675101	0.2	0	0	0	0	0	0	0.1	0.1	0	0.3	0.3	108.1	670.1	464.8	AAEL025320
LOC110675102	0	0	0	0	0	0	0	0	0.4	0.1	0.9	1.1	105.3	473.4	484.6	AAEL021701
LOC110675103	0	0	0.1	0.2	0.3	0.4	0.5	0.3	1	0	0.1	0.1	0.1	0	0.2	AAEL023134
LOC110675104	0	0	0	0	0	0	0	0	0	0.1	0	0	0	0	0	AAEL025441
LOC110675105	0.1	0	0	0.4	0.2	0.1	0.2	0.4	0.6	0.5	0.3	0.2	0.3	0.1	0.1	AAEL024033
LOC110675106	0	0	0.1	0	0.2	0	0.1	0	0.1	0	0	0	0	0	0	AAEL026356
LOC110675107	0.3	1.6	1.4	0.7	0.6	0.3	0	0.1	0	0	0.5	0	0.1	0.2	0.3	AAEL020759
LOC110675108	0	0	0	0.3	0.1	0.1	0.1	0.3	0.4	0.3	0.2	0.1	0.2	0.1	0	AAEL023298
LOC110675110	0.7	0	0.5	0	0	0	0	0.7	0.6	0.3	0.9	0.8	82.1	445.5	332.1	AAEL026388
LOC110675111	0	0	0	0	0.1	0	0	0	0	0	0	0	0	0.1	0	AAEL020289
LOC110675112	1.1	0	1.2	2.4	3	2.9	8.2	10	8	0.9	0.6	0.6	1.5	1.1	1	AAEL026002
LOC110675113	0.5	0	0.3	0.5	2.2	0.6	3.2	3	2.4	0.5	0.3	0.4	0.6	0.4	0.1	AAEL021041
LOC110675114	0.3	0.2	0.2	0.1	0.1	0.1	1	0.7	0.9	13.6	18	13.8	19.6	25	14.9	AAEL024572
LOC110675115	0	0	0	0	0	0	0.2	0.1	0	0	0	0	0	0	0	AAEL027856
LOC110675116	0	0	0	0	0	0	0	0	0	0	0	0.3	0	0	0	AAEL023235				GO:0003924,GO:0005874,GO:0007017	GTPase activity,microtubule,microtubule-based process
LOC110675117	0.8	1.1	1.7	2.3	1.8	3.6	3	2.4	2.6	0	0	0	0.1	0.1	0.2	AAEL026319
LOC110675118	0	0	0	0	0	0	0	0.4	0.3	0	0	0	0	0	0	AAEL023814
LOC110675119	110.1	203	101.5	44.3	36.9	37	43.2	66.9	50.4	4.1	4.8	4.8	11.3	8.7	16.2	AAEL026039
LOC110675120	0	0.6	0.7	0.3	0.5	0	0.2	0.1	0.1	0	0	0	0	0	0.1	AAEL027721
LOC110675121	0	0	0	0	0	0	0	0.4	0	4.5	6.6	8	2.9	2.4	1.4	AAEL019979				GO:0016747	transferase activity, transferring acyl groups other than amino-acyl groups
LOC110675122	14.9	12.6	14.7	11.4	7.6	7.8	4.8	5.7	3.8	2	2.4	2.1	0.8	1.1	0.7	AAEL026491				GO:0003676	nucleic acid binding
LOC110675124	22.8	25.2	25	11.1	7.9	10	3.1	3.8	3.6	2.3	0.7	1.3	2.7	1.3	2.8	AAEL010579
LOC110675125	0	0	0	0	0.1	0	0	0	0	0	0	0	0.1	0	0	AAEL009230				GO:0003676	nucleic acid binding
LOC110675126	0	0	0	0	0	0	0	0	0	0	0	0	0	0	0	AAEL021942
LOC110675127	0	0	0	0	0.6	0	0	0	0	0	0.2	0.5	0	0.8	0.8	AAEL023878
LOC110675128	160.6	206	252.9	548.1	447.3	604.7	208.9	246.3	248.7	243.6	265.2	267.3	420.1	540.3	461.3	AAEL026302
LOC110675129	0	0.2	0	0	0	0	0.1	0.1	0	0	0	0	0	0	0	AAEL025167				GO:0003676,GO:0004523,GO:0090502	nucleic acid binding,RNA-DNA hybrid ribonuclease activity,RNA phosphodiester bond hydrolysis, endonucleolytic
LOC110675130	0	0	0	0	0.1	0	0.4	0.8	0.4	0	0	0.1	0.3	0.3	0.2	AAEL023436
LOC110675131	0.8	1.1	0.8	0.3	0.4	0.3	2.2	1.7	1.4	0.1	0	0.1	0.1	0.2	0.2	AAEL020335
LOC110675133	1	0.2	0.7	0.6	0.1	0.5	0.9	1.3	0.8	0.1	0.1	0.2	0.1	0.3	0.1	AAEL022027
LOC110675135	0.1	0	0	0	0	0	0	0.1	0	0	0	0	0	0	0	AAEL000356	cysteine-rich venom protein, putative [Source:VB Community Annotation]
LOC110675136	0	0	0	0.1	0.1	0	0	0.1	0.1	0	0	0	0	0	0	AAEL025221
LOC110675137	0	0	0.4	0	0	0	0.2	0	0	0	0	0	0.1	0	0	AAEL023420
LOC110675138	0.1	0	0.1	0.1	0.1	0.2	0.5	0.6	0.5	2.2	2.7	1.8	0.9	0.7	0.4	AAEL027907
LOC110675139	41.6	51.9	47.2	36.3	31.2	42.7	40.3	42.3	40.4	1.9	1.5	1.8	4.8	4.6	3.9	AAEL025034				GO:0016491,GO:0051287,GO:0055114	oxidoreductase activity,NAD binding,oxidation-reduction process
LOC110675140	0	0	0	0	0	0	0.1	0	0	0	0	0	0	0	0	AAEL024810				GO:0000786,GO:0003677,GO:0006334,GO:0042025	nucleosome,DNA binding,nucleosome assembly,host cell nucleus
LOC110675142	0.1	0.2	0.2	0.1	0.2	0.1	0.2	0.1	0.2	0.2	0.3	0.1	0.8	1.3	1.5	AAEL025920
LOC110675143	0	0.2	0.1	0	0.2	0.4	0.7	1.2	0.8	1.2	2.4	0.7	2	3	4.2	AAEL023030
LOC110675144	0.9	0.6	0.9	0.9	0.2	0.6	0.4	0.5	0.2	0.2	0.1	0.2	0.1	0.2	0	AAEL026333
LOC110675145	4.7	5.2	6.7	4.1	2.6	1.3	4.1	4.5	3.4	1.6	2.9	1.7	1.2	0.9	1	AAEL023936
LOC110675146	57.4	53.4	62.5	26.7	32.8	28.9	38	35	35.9	8	9.4	7.1	7.5	7.1	9.7	AAEL027347				GO:0003677	DNA binding
LOC110675147	0	0	0	0	0	0	0	0	0	0	0	0	0	0	0	AAEL020141
LOC110675148	0.2	0.1	0.5	0.4	1.7	1.6	1.3	1.3	0.8	0	0.2	0.1	0.1	0.1	0.1	AAEL024635
LOC110675149	0	0.1	0.1	0.9	11.2	1.3	1.1	2.1	1.8	4.5	7.6	4	127.1	47.2	332	AAEL021870
LOC110675150	1032.6	1079	1085.7	768.3	625.9	965.1	496.5	555.6	471.1	271.2	257.3	225.1	264.6	305.4	277.9	AAEL020753				GO:0008073	ornithine decarboxylase inhibitor activity
LOC110675151	0	0	0	0	0	0	0	0	0	0	0	0	0	0	0	AAEL025681
LOC110675152	0.1	0.7	0.3	22.3	0.1	0.1	0	0.1	0.1	0.1	0	0.1	0.3	0.2	0	AAEL022037				GO:0046983	protein dimerization activity
LOC110675153	5.5	3.2	3.9	17.6	13.8	10.3	10.9	10.2	12.6	3.3	4.2	3.5	11.9	10.5	12.5	AAEL025693
LOC110675154	0	0	0	0	0	0	0.6	0.4	0	0	0	0	0	0	0.1	AAEL022038
LOC110675155	0	0	0	0	0	0	0	0	0	0.1	0	0	0	0	0	AAEL022776				GO:0003676,GO:0003677	nucleic acid binding,DNA binding
LOC110675156	0	0	0	0	0	0	0.1	0.1	0	0	0	0	0	0	0	AAEL027272				GO:0003677	DNA binding
LOC110675157	1.2	2.1	1.3	3.8	4.6	2.2	10.8	10	11.6	2.7	2.2	2.5	3	2.6	2	AAEL023973				GO:0005515	protein binding
LOC110675158	0	0	0	0	0	0	0	0	0	0	0	0	0	0	0	AAEL024388
LOC110675159	6	4.9	5.2	1.1	1.5	1	0.7	1.3	1.3	0.1	0	0	0.7	0.7	0.7	AAEL020928				GO:0003676	nucleic acid binding
LOC110675160	0	0	0	0	0	0	0	0.1	0	0	0	0	0	0.1	0	AAEL024344
LOC110675161	0	0	0	0	0	0	0	0	0.1	0	0	0	0	0	0	AAEL024087
LOC110675162	37.6	43.9	45.2	31	27	23.6	39.4	41.4	38.5	8.8	9.2	9.5	23.5	23.2	26.4	AAEL027557				GO:0003777,GO:0005515,GO:0005871	microtubule motor activity,protein binding,kinesin complex
LOC110675163	2.2	1.3	3.9	3.2	4.2	2	5.1	6.8	4.5	1	1.1	0.7	1.6	0.8	0.8	AAEL023788
LOC110675165	61.6	39.5	51.4	23.9	20.5	29.7	3.9	3.4	2.7	0.1	0	0	0.2	0.1	0.2	AAEL021329
LOC110675167	0.5	0.1	0.2	0.2	0.1	0	0.1	0.4	0.2	0	0	0	0.1	0.1	0.2	AAEL026899
LOC110675168	14.8	16	19.8	11.8	10.6	10.2	8.5	10	10.5	2.6	2.4	3.2	4.7	4.4	4.3	AAEL023493
LOC110675169	0	0	0	0	0.2	0.3	0	0	0.1	0.4	0.4	0.7	0.5	1.1	0.7	AAEL019571				GO:0004672,GO:0005524,GO:0006468	protein kinase activity,ATP binding,protein phosphorylation
LOC110675171	0	0.1	0	0	0	0	0	0	0	0	0	0	0	0	0	AAEL025011				GO:0000786,GO:0003677,GO:0046982	nucleosome,DNA binding,protein heterodimerization activity
LOC110675172	0.5	2.8	1.3	0.7	0.9	0.2	1.9	1.2	1.7	0.1	0.2	0.1	0.3	0.2	0.1	AAEL020386
LOC110675173	4.6	10.5	8.8	3	3.6	2.4	11.2	7.8	9.1	0.1	0.4	0.4	0.9	0.5	0.2	AAEL025005
LOC110675174	0	0	0.2	0	0	0	0	0	0	0	0	0	0	0	0	AAEL020174				GO:0003924,GO:0005525,GO:0005874,GO:0007017	GTPase activity,GTP binding,microtubule,microtubule-based process
LOC110675175	0	0.1	0	0	0	0	0.2	0	0	0.1	0.1	0.1	0	0	0.1	AAEL023540
LOC110675176	0.7	0.3	0.9	0	0	0.3	0	0	0	0	0.2	0	0	0	0	AAEL027001				GO:0003676,GO:0008270	nucleic acid binding,zinc ion binding
LOC110675177	0	0	0	0	0	0	0	0	0	0	0	0	0	0	0	AAEL022630				GO:0003824,GO:0005634,GO:0008484,GO:0046872	catalytic activity,nucleus,sulfuric ester hydrolase activity,metal ion binding
LOC110675178	13.1	16.3	13.6	2.7	4	2	6.2	6.4	6	0.3	0.2	0.4	0.8	0.9	0.5	AAEL026110				GO:0005886,GO:0007155	plasma membrane,cell adhesion
LOC110675179	0.1	0.3	0.2	0	0.2	0	0.2	0.2	0.2	0.3	0.2	0.3	0.6	0.7	0.9	AAEL021237				GO:0003676	nucleic acid binding
LOC110675180	0	0	0.2	0	0	0	0	0	0.1	0	0	0	0.1	0	0	AAEL028058				GO:0005549	odorant binding
LOC110675181	0.8	2.6	1.2	0.3	0.3	0.3	3.2	2	2.8	0.1	0.4	0.3	0.3	0.1	0.2	AAEL022553				GO:0003676,GO:0008270	nucleic acid binding,zinc ion binding
LOC110675182	2.3	1.1	1.4	0.1	0.2	0.1	0.2	0.3	0.2	0	0	0	0	0.1	0	AAEL022052
LOC110675184	20.4	41.4	25.9	29	37.6	17.9	113.8	133.6	116.3	1.5	1.2	1.4	4.2	2.9	11.2	AAEL021132				GO:0015267,GO:0016020,GO:0055085	channel activity,membrane,transmembrane transport
LOC110675185	1.1	1.5	1.1	2.7	3.6	2.7	2.6	2.8	3.2	14.2	9.9	10.4	4.3	3.4	4.1	AAEL024878
LOC110675186	27.6	29.4	26.9	18.1	19.5	20.5	14.1	13.1	12.7	0.2	0.3	0.4	1	1	1.2	AAEL020254				GO:0003677,GO:0006260	DNA binding,DNA replication
LOC110675187	0	0	0	0	0	0	0	0.1	0.8	0	0	0	0	0	0	AAEL028051				GO:0005576,GO:0008061	extracellular region,chitin binding
LOC110675188	0	0.1	0.2	0	0.1	0.2	0.2	0.4	0.1	0	0	0	0.3	0	0	AAEL023537				GO:0003676	nucleic acid binding
LOC110675190	0	0.1	0	0	0	0	0	0.4	0	0	0.1	0	0.1	0.1	0.1	AAEL027746
LOC110675191	0	0.1	0	0	0	0	0	0	0	0	0	0	0	0	0	AAEL025036
LOC110675192	0	0	0	0	0.1	0	0.1	0.1	0.1	0.1	0.4	0.2	0.2	0.4	0.2	AAEL021441				GO:0000166,GO:0005524,GO:0016020,GO:0016021,GO:0016887,GO:0042626,GO:0055085	nucleotide binding,ATP binding,membrane,integral component of membrane,ATPase activity,ATPase-coupled transmembrane transporter activity,transmembrane transport
LOC110675194	0.1	1.9	0.6	0	0.3	0	0	0	0	0.5	0.7	0.4	3.2	5.8	4.2	AAEL027107				GO:0003723,GO:0005737,GO:0030430	RNA binding,cytoplasm,host cell cytoplasm
LOC110675195	0	0	0	0	0	0	0	0	0	0	0	0.4	0.2	0.4	0.6	AAEL019497
LOC110675196	29.7	35.7	34.8	25.1	20.4	29.4	29.8	30.8	29.4	1.2	1.2	1.2	3.4	2.7	3.3	AAEL006679	3-hydroxyisobutyrate dehydrogenase, putative [Source:VB Community Annotation]			GO:0016491,GO:0050661,GO:0051287,GO:0055114	oxidoreductase activity,NADP binding,NAD binding,oxidation-reduction process
LOC110675197	0.1	0.2	0.2	0.1	0.1	0.1	0.5	0.5	0.4	0.1	0.1	0	0	0	0	AAEL023830
LOC110675198	2	1.1	2.1	5.2	4.1	3.3	1	1.1	0.9	0.5	0.4	0.2	1.3	0.4	1.6	AAEL027414
LOC110675199	0	0	0	0	0	0	1.1	2	8.7	0.2	0.4	0.5	0	0	0	AAEL024986
LOC110675200	0	0	0	0	0	0	0	0	0.1	0	0	0	0	0	0	AAEL022348
LOC110675201	0	0	0	0	0	0	0	0	0.2	0	0	0	0	0	0	AAEL026426
LOC110675202	0	0	0	0	0	0	0	0	0	0	0	0	0	0	0	AAEL023868
LOC110675203	0	0.2	0	0.1	0	0	0	0.1	0	0.6	0.1	1	0.2	0	0.1	AAEL027332				GO:0005515	protein binding
LOC110675204	0.2	0.3	0.1	0	0	0	0.2	0.2	0	0	0	0	0	0	0	AAEL025162
LOC110675205	0.6	0.4	0.5	0.5	0.3	0.2	0.4	0.6	0.6	0	0	0	0.1	0.1	0.1	AAEL021009
LOC110675207	0	0	0	0	0	0	0	0	0.1	0	0	0	0	0	0	AAEL021260
LOC110675208	0	0	0	0	0	0	0	0	0.1	0	0	0	0	0	0	AAEL025461
LOC110675209	0	0	0	0	0	0	0	0	0	0	0	0	0	0	0	AAEL022874
LOC110675210	80.8	88.9	88	46	59.7	47.7	96	101.5	101.2	2.3	2.4	3.6	20	16.2	23	AAEL026371				GO:0016020,GO:0016021,GO:0016874,GO:0046872	membrane,integral component of membrane,ligase activity,metal ion binding
LOC110675211	0.6	0.3	0.4	0.1	0.5	0.4	1	0.8	0.8	0	0	0.1	0	0.1	0	AAEL022223
LOC110675212	0	0.2	0	0	0	0	0	0	0	0	0	0	0	0	0	AAEL021647
LOC110675215	0	0	0	0	0	0	0	0.1	0	0.1	0.2	0.1	0.7	0.7	1.7	AAEL024593
LOC110675216	1.2	0	0.3	0	0	0	0.9	0.9	0.7	28.9	16.2	27.1	53.6	41	46.2	AAEL024000				GO:0005549	odorant binding
LOC110675217	0	0	0	0	0	0	0.2	0	0.2	0	0	0	1.1	0.4	4.1	AAEL027468				GO:0005549	odorant binding
LOC110675220	0	0.3	0.1	0	0	0	0.1	0	0	0	0	0	0.1	0	0	AAEL021689
LOC110675222	0	0	0	0	0	0.1	0.1	0.6	0.4	0	0.1	0.2	0	0	0.2	AAEL027683
LOC110675223	0.2	0.1	0.2	0.2	0.5	0.1	0.6	1	1.1	0.5	0.4	0.3	1.2	1.7	1.6	AAEL023243				GO:0005509,GO:0005886,GO:0007155,GO:0007156,GO:0016020	calcium ion binding,plasma membrane,cell adhesion,homophilic cell adhesion via plasma membrane adhesion molecules,membrane
LOC110675224	0	0.1	0	0	0	0	0	0	0	0	0	0.1	0	0	0	AAEL024349				GO:0000786,GO:0003677,GO:0046982	nucleosome,DNA binding,protein heterodimerization activity
LOC110675225	0.2	0.1	0.5	0.1	0	0.3	0.3	0.6	0.6	0.1	0	0	0	0.2	0.1	AAEL027614
LOC110675227	1.5	0	0.3	0.3	0.6	0.3	0.5	0	0	0	0	0	0.2	0	0.2	AAEL026647				GO:0000786,GO:0003677,GO:0046982	nucleosome,DNA binding,protein heterodimerization activity
LOC110675228	0	0	0	0	0	0	1	0.8	6.2	0	0	0	0	0	0	AAEL026563				GO:0005549	odorant binding
LOC110675229	0.1	0.1	0.1	0.1	0.1	0	0.1	0.8	0.7	0	0	0.1	0.1	0	0.1	AAEL023086
LOC110675230	0	0	0	0	0	0	0	0	0	0.1	0	0	0	0	0	AAEL023149				GO:0004497,GO:0005506,GO:0016020,GO:0016021,GO:0016705,GO:0020037,GO:0046872,GO:0055114	monooxygenase activity,iron ion binding,membrane,integral component of membrane,oxidoreductase activity, acting on paired donors, with incorporation or reduction of molecular oxygen,heme binding,metal ion binding,oxidation-reduction process
LOC110675231	0.9	0.1	0.6	2.1	3.7	1.8	4.1	4.1	3.4	2.6	1.7	1.7	0.4	0.7	0.2	AAEL026572
LOC110675232	0	0	0	0	0.5	0.1	0.1	0	0	0	0.2	0	10.6	63.4	52.7	AAEL021721
LOC110675233	0	0	0	0	0	0	0	0	0	0.3	0.2	0.1	0.2	0.2	0.1	AAEL025283
LOC110675234	0	0	0	0	0	0	0.1	0.1	0.1	0	0	0	0	0	0	AAEL021321				GO:0003676,GO:0003677	nucleic acid binding,DNA binding
LOC110675235	0.7	2.7	1.1	0.1	0.2	0.1	0.3	0.6	0.3	0	0	0.1	0	0	0	AAEL024378
LOC110675236	0	0.1	0	0	0	0	0	0	0	0	0	0	0	0	0
LOC110675237	1.3	3	2.7	0.9	1.3	1	0.9	1.3	2.3	0.1	0.1	0	0.3	0.5	0	AAEL020775				GO:0031409	pigment binding
LOC110675238	0	0	0.2	0	0.2	0.5	0.1	0	0	0	0	0.2	26.3	263.6	162.7	AAEL024584
LOC110675239	0.1	0.1	0.1	0.1	0.1	0.2	0.1	0	0	0	0	0	0	0	0	AAEL023789
LOC110675240	0	0	0	0	0	0	0	0	0	0	0	0	0	0	0	AAEL027251				GO:0003677,GO:0006313,GO:0015074	DNA binding,transposition, DNA-mediated,DNA integration
LOC110675241	14.9	78.5	22.9	0.4	1.8	0.6	30.6	34	28.2	6.2	7.2	5.4	13.1	13.9	6.9	AAEL020558				GO:0005506,GO:0016705,GO:0020037,GO:0055114	iron ion binding,oxidoreductase activity, acting on paired donors, with incorporation or reduction of molecular oxygen,heme binding,oxidation-reduction process
LOC110675242	0.1	0	0.1	0	0.1	0	0.2	0	0	0.1	1.3	3.3	12.3	157.9	52.6	AAEL024610
LOC110675243	0.3	0.8	0.2	0.1	0.1	0.5	0.6	0.1	0.3	0.7	1.2	2	12.6	170.1	62.5	AAEL021662
LOC110675244	0	0	0.1	0.2	0.2	0.1	0.2	0.2	0.1	0	0	0	0	0	0	AAEL021341
LOC110675246	47.5	42.2	44.4	30.7	30.1	23.6	36.3	35.1	35.4	6.5	6.6	5.4	12.8	11	13.6	AAEL019976
LOC110675247	0.2	0.2	0.1	0.1	0.2	0.1	0.8	0.8	1.2	0	0	0	0	0	0	AAEL022298
LOC110675252	0	0	0	0	0	0	0	0	0	0	0	0	0	0	0	AAEL022211				GO:0003924,GO:0005525,GO:0005874,GO:0007017	GTPase activity,GTP binding,microtubule,microtubule-based process
LOC110675253	1.2	0.5	1.5	2.6	5.8	1.7	24.1	25.8	22.8	1.9	2.2	2.3	5.5	5.3	10	AAEL027881				GO:0005509,GO:0005886,GO:0007155,GO:0007156,GO:0016020	calcium ion binding,plasma membrane,cell adhesion,homophilic cell adhesion via plasma membrane adhesion molecules,membrane
LOC110675255	0	0.2	0.1	0.1	0.3	0.2	0.1	0	0.1	0	0	0	0	0	0	AAEL026504				GO:0003677,GO:0003700,GO:0005737,GO:0006355,GO:0042025	DNA binding,DNA-binding transcription factor activity,cytoplasm,regulation of transcription, DNA-templated,host cell nucleus
LOC110675256	0.2	0	0	0.1	0.3	0.2	0.4	0.1	0.5	0.5	0	0.2	1.4	1.4	0.2	AAEL021867
LOC110675257	0	0.1	0.2	0.2	0.2	0.1	0.2	0.3	0.2	1.8	1.9	1.9	4	8.2	2.9	AAEL025410				GO:0005515,GO:0005634,GO:0016020,GO:0016021	protein binding,nucleus,membrane,integral component of membrane
LOC110675258	0.1	0.8	0.1	0.2	0.6	0.2	2.9	2.6	2.2	0.1	0.3	0.1	0.8	0.5	0.8	AAEL020648
LOC110675259	0.1	0.1	0.2	0	0.1	0.1	0.2	0.2	0.3	0.1	0.1	0.1	0.2	0.2	0.2	AAEL024223				GO:0003676	nucleic acid binding
LOC110675260	1.4	1.4	3.1	4.6	3.4	0.7	5.2	4.1	6.1	0.1	0.3	0	0.5	0.6	0.9	AAEL026248
LOC110675261	14.6	17	16	4.7	9.1	7.5	8.4	8.5	7.4	0.7	0.7	0.5	1.4	0.9	1.1	AAEL022684
LOC110675262	0	0.1	0	0.1	0	0.1	0.1	0.2	0.1	0.2	0.3	1.5	0.7	1.6	0.9	AAEL027409
LOC110675263	0	0	0	0.2	0	0	0.1	0	0.3	1.2	1.8	2.1	1.5	0.8	0.7	AAEL023828
LOC110675264	0.1	0.3	0.5	0.3	0.6	0.3	1.5	0.9	1.6	0	0	0	0	0	0.1	AAEL023239
LOC110675265	0	0	0	0	0	0	0.1	0	0	0	0	0	0	0.1	0.2	AAEL027864
LOC110675266	0.6	0.4	2	0.2	0.4	0.4	0.7	1.3	1.4	0.2	0	0	0.3	0	0.1	AAEL024648
LOC110675267	0	0	0.1	0	0	0	0.1	0.2	0	0	0	0	0	0.1	0	AAEL020791
LOC110675268	0.1	0.5	0.4	0	1	1.1	0	0.2	0	0	0	0	0	0	0	AAEL021378
LOC110675269	0	0	0	0	0	0	0.2	0	0.2	0.1	0	0	0	0	0	AAEL025340
LOC110675270	0.2	0.4	0.2	0.3	0.9	0.5	1.1	1.6	1.2	0	0.1	0	0.3	0	0	AAEL020663
LOC110675271	2.1	2.1	1.2	1	1	0.8	0.8	1	1.2	0.1	0.2	0.2	0.5	0.3	0.4	AAEL027300
LOC110675272	2.2	1	1.3	3.2	3.6	2.1	4.2	4.3	5	3.7	3.1	4.1	2.3	3	1.7	AAEL025536
LOC110675273	0.1	0.2	0.1	0	0.1	0	0.2	0.3	0.2	0.1	0.1	0.1	0.2	0.3	0.2	AAEL021875				GO:0003676,GO:0003677	nucleic acid binding,DNA binding
LOC110675274	0.3	0.4	0.4	0.4	0.4	0.9	1.4	1.8	1.9	0	0.1	0	0.1	0.1	0.1	AAEL022303
LOC110675275	8.6	11.5	10.1	4.9	3.5	4.7	7.4	5.6	5.8	0.1	0.1	0	0.1	0.2	0.2	AAEL026857
LOC110675276	9.6	17.7	8.3	1.3	5.4	2.2	5.3	7.1	5.2	0.5	0.2	0.4	0.4	2.1	1.9	AAEL026334
LOC110675277	0.8	1	1	0.5	2	2.2	3.5	3	4	0	0.4	0.6	0	0.5	0.1	AAEL022884
LOC110675278	0	0	0	0	0	0	0	0.1	0	0	0	0	0	0	0	AAEL025178
LOC110675279	1799.4	5387.3	3107.7	136.3	136.2	151.1	3523.5	3499.3	2989.8	0.8	0.3	0.9	0	0	0.5	AAEL023797
LOC110675280	3.6	23.7	77.5	8.1	2.1	16.7	731.5	389.2	579.9	0.2	0.1	0	0	0.1	0	AAEL027677
LOC110675281	0.2	0.2	0	0.2	0.3	0.5	0.1	0	0.1	0.3	0.1	0.1	0	0.3	0.1	AAEL025898
LOC110675282	0	0	0.1	0.1	0	0	0	0	0	0	0	0	0	0	0.1	AAEL020087
LOC110675283	0.1	0.1	0.4	0.1	0.4	0.1	1.2	0.6	1.3	0	0	0.1	0.2	0.1	0	AAEL022525
LOC110675284	0.1	0.3	0.2	0.5	0.2	0.5	1.2	0.6	0.9	0	0.1	0	0	0.1	0	AAEL025374
LOC110675285	0	0	0	0	0	0.2	0.1	0.4	0	0	0	0	0.1	0.1	0	AAEL023594
LOC110675286	0	0.1	0.1	0.2	0.3	0.2	0.8	0.8	0.8	0.2	0.3	0.3	0.3	0.5	0.3	AAEL028181
LOC110675287	0.1	0.2	0.1	0	0	0	0	0	0	0	0	0	0	0	0	AAEL026642
LOC110675288	109.8	103.4	100.8	83.5	102.1	102.2	128.6	128.3	132.2	10.8	10.1	11.4	63.2	48	66.5	AAEL023028	Density-regulated protein [Source:UniProtKB/TrEMBL;Acc:A0A0P6IY07]			GO:0003743,GO:0006413	translation initiation factor activity,translational initiation
LOC110675289	1	0.1	0.2	1	1.8	0.4	1.9	2.7	1.7	0.2	0.3	0.3	0.5	0.8	0.7	AAEL027276
LOC110675290	0.3	0	0.5	1.6	0.9	0.5	0.5	0.4	1.1	0	0	0	1.8	0.4	2.3	AAEL020356
LOC110675291	0	0.2	0.4	0.3	0.6	0.1	0.2	0.6	0.1	0.1	0.1	0.1	0.4	0.3	0.2	AAEL022700
LOC110675292	0	0.1	0.2	0.1	0.3	0	0.1	0.3	0	0	0.1	0	0.2	0.1	0.1	AAEL021285
LOC110675293	87.9	88.2	96.9	64.7	67.6	78.2	57.5	51.8	63	4.6	5.1	3.7	14.1	9.6	13.8	AAEL028155				GO:0000166,GO:0003824,GO:0005666,GO:0006352,GO:0006384,GO:0030880,GO:0044237	nucleotide binding,catalytic activity,RNA polymerase III complex,DNA-templated transcription, initiation,transcription initiation from RNA polymerase III promoter,RNA polymerase complex,cellular metabolic process
LOC110675294	1.5	0.9	0.9	0.1	1.1	0.8	0.2	0	0.2	9.6	10.1	9.7	3.9	4.4	3.4	AAEL011492
LOC110675295	0	0	0	0	0	0	0	0	0	1.3	1	1.3	1.5	1.7	1.4	AAEL025201
LOC110675296	0	0	0	0	0	0	0	0.1	0.1	0	0	0	0.1	0.6	0.7	AAEL023556
LOC110675297	0.3	0.5	0.4	0.6	0.8	0.4	0.8	0.8	0.8	0	0.3	0	0.5	0.3	0.1	AAEL024770
LOC110675298	22.8	57.9	33.3	9.2	8.9	4.9	39.9	38.7	42.1	0.1	0	0.1	0.2	0.1	0.2	AAEL023358
LOC110675299	0.6	0.2	0.2	0.1	0.5	0.4	0	0.1	0.1	0	0	0	0.1	0	0	AAEL024620
LOC110675300	0.3	0.8	0.4	0.7	1.4	0.6	1.1	1	1.4	0	0	0	0	0.1	0	AAEL022869
LOC110675301	0	0	0	0	0	0	0	0.2	0	0	0	0	0	0	0	AAEL027071
LOC110675302	0	0.1	0.1	0.3	0.1	0.2	0.2	0.4	0.2	0	0	0	0.1	0	0	AAEL021675
LOC110675303	1.1	0.6	1.1	1.4	2.5	1.3	1.4	1.6	1.9	0.1	0	0	0.6	0.3	0.1	AAEL026308
LOC110675304	0	0	0	0	0	0	0	0.1	0	0	0	0	0.1	0	0	AAEL024250
LOC110675305	2.3	3.2	2.9	2.1	2.4	1.2	2	2.3	2.2	0.6	0.6	0.6	0.6	0.4	0.5	AAEL020550
LOC110675306	0	0	0	0	0	0	0.1	0	0	267.9	314.4	378.5	96.2	68.1	49.6	AAEL023643				GO:0004252,GO:0006508	serine-type endopeptidase activity,proteolysis
LOC110675307	2.3	4.5	3.9	2.2	0.7	0.7	0.6	0.5	0.6	0.2	0.5	0.2	0.1	0.2	0.3	AAEL027826
LOC110675308	4.6	3.5	2.5	2.3	2.1	2	2.7	3	3.4	0.2	0.9	0.1	0.7	0.5	0.3	AAEL026062
LOC110675309	0.4	0.4	0.3	1.4	1	0.6	1	1.3	1.5	0.2	0.1	0.5	0.8	0.6	0.2	AAEL022807
LOC110675310	0.5	0	0	0	0.3	0.4	0	0	0	0	0	0	0	0.1	0	AAEL026138
LOC110675311	11.4	16.2	16.8	5.5	1.8	5.8	0	0.9	0.7	0	0	0	0	0	0	AAEL021457
LOC110675312	0.3	0	0.1	0	0	0	0.5	0.1	2.3	0.1	0.4	0.2	0.3	0.4	0.1	AAEL024983
LOC110675313	0	0.1	0.1	0	0	0.2	0	0.1	0.1	0	0	0	0.4	0.2	0.1	AAEL023872
LOC110675314	0.3	0	0.2	0.2	0.3	0.2	0.4	0.1	0.3	0.4	0.3	0.1	0.3	0.4	0.2	AAEL023433
LOC110675315	1.4	0.9	1.2	1.3	1.5	0.9	1.8	1.3	2.1	0.3	1.9	0.1	0.2	0.2	0.3	AAEL026753
LOC110675316	0	0	0.1	0.1	0	0.2	0.1	0.2	0.4	0	0	0	0.1	0.4	0.2	AAEL022186
LOC110675317	0.3	0.1	0.8	1.5	1.1	0.5	3.3	1.5	2.1	0.7	0.8	0.3	0.7	1.7	0.5	AAEL022022
LOC110675318	97.2	114.6	105.4	95	85.4	83.3	164.3	144.9	150.2	427.5	434.6	420.2	649.9	613.3	515.3	AAEL021342	V-type proton ATPase subunit [Source:UniProtKB/TrEMBL;Acc:Q1HQS1]
LOC110675319	0	0.1	0	0	0	0	0	0	0	0	0	0	0	0.1	0	AAEL025067
LOC110675320	0.1	0.3	0.2	1.3	1.3	1.2	0.6	1.1	1.2	0.6	0.4	0.7	0.4	0	0.1	AAEL025023
LOC110675321	0	0.1	0.2	0.3	0.5	0.1	0.3	0.2	0.2	0	0	0	0.1	0	0	AAEL022904
LOC110675322	0	0	0	0.1	0	0	0	0.1	0	0.1	0	0	0.3	0.3	0.2	AAEL026320
LOC110675323	0.2	0.2	0.2	0.2	1.6	0.5	0.1	0.8	0.4	0.1	0	0	0	0	0	AAEL021677
LOC110675324	1.6	4.7	2.8	1.9	2.4	0.9	3.3	3.7	3.9	1.4	2.3	2.1	4.2	2.7	6.7	AAEL022120
LOC110675325	0	0	0	0	0	0	0.1	0.1	0	0	0	0.1	0.1	0.2	0.2	AAEL025753
LOC110675326	0	0	0	0	0	0	0	0	0	0	0	0	0	0	0	AAEL020165
LOC110675327	0.1	0.6	0.4	0.8	1.4	1.9	2.3	1.3	1.8	0	0	0.2	0	0	0.1	AAEL024928
LOC110675328	0.1	0.2	0	0.1	0.1	0.1	0	0.2	0.1	0	0	0	0	0	0	AAEL023477
LOC110675329	0	0	0	0	0	0	0	0	0	0.2	0.1	0.2	0.1	0	0.1	AAEL028060
LOC110675330	0.1	0	0	0	0.4	0	0	0.4	0	0.7	0.3	0.6	0.6	0.5	0.3	AAEL023476
LOC110675331	0	0.2	0.2	0.1	0.2	0.2	0.1	0.2	0.1	0.5	0.3	0.6	0.4	0.2	0.2	AAEL028090
LOC110675332	6.3	9.8	10.9	21.4	38.4	18.2	38.1	33	34.6	4.6	6.4	5	7.8	5.2	9.2	AAEL022559
LOC110675333	0	0	0	0	0	0	0	0	0.1	0	0	0	0	0	0.2	AAEL027173
LOC110675334	0	1	0	0	0	0	0.7	1.5	1.4	0.3	0	0	0	0	0	AAEL021259
LOC110675335	0.6	0.4	0.7	0.2	0.3	0.1	0.6	0.6	0.4	1.4	0.5	0.8	2.3	5.4	4.6	AAEL025714
LOC110675336	0	0	0	0	0	0	0.4	1.4	0	0	0	0	0	0	0	AAEL021966
LOC110675337	0	0.1	0	0	0	0	0	0.1	0	0	0	0	0	0	0	AAEL024874
LOC110675338	0	0	0	0	0	0	0	0	0	0	0	0	0	0	0	AAEL025192
LOC110675339	0	0	0	0	0.2	0	0	0	0	0	0	0	0	0	0	AAEL023482
LOC110675340	0	0.1	0.1	0	0	0	0	0.1	0.1	0.1	0	0	0.1	0	0.1	AAEL021048
LOC110675341	0.3	0.8	0.8	1	1.2	1	1.3	1.6	1.3	0	0	0.1	0.1	0.1	0.1	AAEL023771
LOC110675342	0.3	0.4	0.2	0.2	0.1	0.4	0.2	0.3	0.4	0.1	0	0	0	0.1	0	AAEL019897				GO:0003676	nucleic acid binding
LOC110675343	23.9	22.4	22.1	29.1	28.6	29.6	20.9	23.1	22.3	44	45.9	45.9	14.7	16.8	15	AAEL024690				GO:0004222,GO:0006508,GO:0008233,GO:0008237,GO:0016787,GO:0046872	metalloendopeptidase activity,proteolysis,peptidase activity,metallopeptidase activity,hydrolase activity,metal ion binding
LOC110675344	1.7	2.1	2.3	0	0	0	0.1	0.3	0.1	0	0	0	0	0	0	AAEL023545
LOC110675345	0	0	0	0.2	0.7	0.3	0	0.2	0	0.2	0.2	0	0	0.2	0.2	AAEL027165
LOC110675346	0.8	0.5	0.5	1.3	1.4	0.7	1.9	1.7	2.3	1.4	1.1	1.7	1.1	1.4	0.6	AAEL022381
LOC110675347	3.1	3.1	4.3	1	3.3	1	4.6	3.9	2.5	0.3	0.3	0.1	1.1	0.4	1.6	AAEL025998
LOC110675348	0	0.1	0.2	0	0	0	0.1	0	0.1	0	0	0	0.2	0	0	AAEL025866
LOC110675349	0	0	0	0	0	0	0	0	0	0	0	0	0	0	0	AAEL021290
LOC110675350	22.2	19.2	22.1	13.3	14.2	12.5	9.7	10.3	9.8	56.1	53.9	50.1	41.9	37.3	46	AAEL020466				GO:0016971,GO:0016972,GO:0055114	flavin-linked sulfhydryl oxidase activity,thiol oxidase activity,oxidation-reduction process
LOC110675351	0.2	2.1	0.6	0	0.1	0	0.4	0.6	0.4	0.7	0.5	0.1	0.2	0	0.2	AAEL028103
LOC110675352	2	2	3.9	2.2	1.4	1	3.8	2.7	3.8	0.1	0	0.1	0.2	0.2	0.1	AAEL023268
LOC110675353	0.9	0.4	0.4	1.5	0	0.5	0.1	0.2	0.3	0	0	0	0	0	0	AAEL026704
LOC110675354	0.3	0.2	0.3	0.4	1.1	0.3	0.2	0.4	0.7	0.1	0	0	0	0.3	0	AAEL019759				GO:0004784,GO:0006801,GO:0016209,GO:0016491,GO:0019430,GO:0046872,GO:0055114,GO:0098869	superoxide dismutase activity,superoxide metabolic process,antioxidant activity,oxidoreductase activity,removal of superoxide radicals,metal ion binding,oxidation-reduction process,cellular oxidant detoxification
LOC110675355	0.5	0.7	0.4	0.4	1	2.1	1.4	0.8	0.5	0	0	0	0	0	0	AAEL025857
LOC110675356	0.6	1.1	0.4	0.2	0.2	0	0.2	0.2	0.2	0	0	0	0	0	0	AAEL021906
LOC110675357	4	4.5	5.6	0.5	2.2	2.7	1.6	1.5	1.4	0.1	0.7	0.4	0.2	0.2	0.1	AAEL024970
LOC110675358	0	0.2	1.3	4	4.6	1.9	5.2	5.2	4.1	1.1	0.7	2.1	0.2	1.2	1.9	AAEL025157
LOC110675359	4.5	3.4	4.5	1.8	2.9	3.3	3.2	2.8	4.3	0.8	1	1.2	3	2.6	1.8	AAEL020424
LOC110675360	3.5	4.1	6.2	12.8	10.2	6.9	18.2	15.6	17.2	7.2	4.5	6.2	10.1	8.5	11.1	AAEL025860
LOC110675361	0.1	0	0	0.1	0.1	0	0.4	0.5	0.1	0.1	0	0	0.1	0.1	0.2	AAEL020125
LOC110675362	0.1	0.4	0.8	0.2	0.1	0.1	0.5	0.5	0.3	0.1	0.1	0.1	0.1	0.1	0.1	AAEL024768
LOC110675363	1.1	1.3	1.2	1.9	1.5	1	1.9	2.4	1.4	0.1	1.1	0	1.9	1.3	0.3	AAEL027695
LOC110675364	3	1.6	1.8	0.2	0.3	0.3	1.8	0.8	2	0	0	0	0	0	0	AAEL020923
LOC110675365	0	0.1	0.2	0.4	0.8	0.4	3	2.9	2.3	0.3	0	0.3	0.2	0.4	0.1	AAEL023300
LOC110675366	39.5	51.6	40.7	28	25.8	20	39.6	42.8	37.6	8.3	10.6	8.1	16.2	17.3	12.4	AAEL027779
LOC110675367	0.1	0.1	0.1	0.2	0.4	0.1	0.3	0.2	0.2	0.1	0.1	0.2	0.1	0.1	0	AAEL022400
LOC110675368	5.7	5.1	7.1	2.1	1.7	2.3	0.9	0.9	0.3	0	0.1	0	0	0.2	0	AAEL026418
LOC110675369	0	1.2	0	0	0	3.3	0	0	0.3	0	0	0.1	0	0	0	AAEL022848
LOC110675370	0	0.1	0.2	0.5	0.7	0.2	2.4	1.3	1.7	4.4	4.4	5	3.6	4.6	3.5	AAEL020603
LOC110675371	147.6	143.7	167.3	141.5	147.4	233.3	42.4	42.2	33.6	2.1	1.7	1.8	3	2.5	3.5	AAEL027353
LOC110675373	0	0	0.2	0.2	0.1	0.2	0.1	0.2	0.6	0	0	0	0	0	0.2	AAEL026483
LOC110675374	0	0	0	0.2	0.1	0	0.2	0.1	0	0	0	0	0.4	0.1	0.1	AAEL025540
LOC110675375	0	0	0.1	0.2	0	0.1	0.1	0.3	0.1	0	0.1	0	0.1	0	0	AAEL022026
LOC110675376	7.4	9.1	9.2	5.4	7.9	6.1	13.9	14.7	14.6	3.4	3.2	3.1	3.3	2.5	3.1	AAEL024628
LOC110675377	0.1	0	0.1	0	0	0.1	0	0	0	0	0	0	0.1	0.1	0	AAEL020046
LOC110675378	0.4	0.5	0.7	0.2	0.4	0.4	3.2	1.5	2.8	0.2	0	0.1	27.4	2	134.8	AAEL025434
LOC110675379	0	0	0.2	0	0	0	0.1	0	0	0	0	0	0	0	0	AAEL021912
LOC110675380	0	0	0	0	0	0	0	0.1	0.1	0	0	0	0.1	0.5	0.6	AAEL026444
LOC110675381	0.3	0	0	0.2	0.4	0	1	0.8	0.9	0	0.4	0.6	2.8	3.1	2.5	AAEL023414
LOC110675382	0.4	0	0	0	0	0	0	0.2	0.2	0	0.1	0	0.2	0.1	0.1	AAEL027663
LOC110675383	0.2	0.2	0.1	1.2	0.7	1.3	0.7	1.1	1.3	0.4	0.4	0.6	0.4	0.4	0.1	AAEL020900
LOC110675384	0	0	0	0	0	0.1	0.3	0.3	0.6	0	0.2	0	0	0	0	AAEL020678
LOC110675385	0	0	0	0	0	0	0	0.1	0.1	0	0	0	0.1	0.5	0.6	AAEL027253
LOC110675386	19.8	17.4	20.6	14.8	17.9	15.3	23.3	23.5	21.6	5.2	5.1	5.8	10.6	10.2	10.3	AAEL019620				GO:0016021	integral component of membrane
LOC110675387	0	0	0	0	0	0	0	0.1	0.1	0	0	0	0.1	0.5	0.6	AAEL024324
LOC110675388	3.2	6.4	5	3.7	1.9	2.5	1.3	2	1.8	0.4	0.2	0.2	2.6	2.1	1.5	AAEL021567
LOC110675389	0.1	0.1	0.3	1	1.3	0.9	1	1.2	0.5	0.1	0.1	0.1	0	0	0.2	AAEL025978
LOC110675390	0.2	0.8	0.6	0.1	0.1	0.1	0.4	1.2	0.4	0.5	0.9	0.9	0.9	1.1	1.2	AAEL022539				GO:0003676	nucleic acid binding
LOC110675391	0.1	0.3	0.3	0.2	0	0.3	0.1	0	0.1	0	0	0	0	0	0	AAEL028209
LOC110675392	8.2	7.3	11.2	2.1	3.5	7.4	1.2	1.8	1.5	0.1	0.4	0	0.3	0.2	0.2	AAEL023397
LOC110675393	0.1	0.1	0.6	0.1	0.1	0.2	0.6	0.5	0.1	0	0	0	0.2	0.1	0	AAEL020803
LOC110675394	0.1	0.1	0.1	0.4	0	0.1	0.6	0.3	0.5	0.1	0.3	0.2	0.4	0.3	1	AAEL024836				GO:0003676,GO:0003677	nucleic acid binding,DNA binding
LOC110675395	0	0	0	0	0	0	0	0	0	0	0	0	0	0	0	AAEL021913
LOC110675396	0.9	0.8	1.2	1.5	2.6	1.4	2.3	2.6	2.5	0.7	0.8	0.9	1.2	1.6	0.8	AAEL024712
LOC110675397	10.6	15.8	15.7	14.3	14.6	11.4	22.2	28.5	21.8	16.2	17.1	15.3	11.4	13.9	10.5	AAEL020955				GO:0003676,GO:0008270	nucleic acid binding,zinc ion binding
LOC110675398	0	0.2	0.1	0.2	0.1	0.1	0.1	0.1	0.1	0	0.1	0.3	16.6	106.1	12.5	AAEL026396
LOC110675399	2.1	2.7	4.6	1.2	2.3	1	1.2	0.6	1.1	0	0.2	0.1	2.5	14.2	1.9	AAEL022796
LOC110675400	2.6	1	4	3.4	2.1	1.9	0.8	1	0.3	0.1	0	0	0.9	6.1	0.3	AAEL021892
LOC110675401	1.7	1.1	3.3	1.1	0.7	0.9	0	0.1	0.2	0	0	0	0.6	6.2	1	AAEL027233
LOC110675402	0	0	0.2	0	0.1	0	0.1	0.3	0.2	0	0	0	0	0	0	AAEL020478
LOC110675403	0.2	0.3	0.3	0	0.1	0	0	0.2	0.1	13.9	9.9	11.3	13.5	8.9	12.4	AAEL026415				GO:0017121,GO:0017128	plasma membrane phospholipid scrambling,phospholipid scramblase activity
LOC110675404	30	100.5	111.1	852.2	47.9	410.1	10.5	22.7	12.4	0.4	1	0.1	0.5	0.9	0.4	AAEL022838
LOC110675405	0	0.4	0	1.1	0.7	0	1.3	1.3	3.1	6.3	2.6	6.3	2	0.8	1.5	AAEL021954
LOC110675406	6.2	6.1	7.3	1.4	1.3	1.9	2.2	1.6	2.8	0	0	0.3	0.5	0.1	0.4	AAEL022354
LOC110675407	0.3	0.5	0.2	0.7	1.4	1.2	2	2	2	0	0	0	0.1	0.3	0.1	AAEL021034
LOC110675408	33	37.1	38.7	23.6	24.6	19.9	96.5	95.9	88.5	8.4	8.6	8.3	11.6	13	11.3	AAEL025591				GO:0000166,GO:0005524,GO:0005737,GO:0017112,GO:0055037	nucleotide binding,ATP binding,cytoplasm,Rab guanyl-nucleotide exchange factor activity,recycling endosome
LOC110675409	0.3	0	0	0.1	0.1	0	0.1	0.3	0.2	0	0.1	0	0.1	0	0	AAEL027369
LOC110675410	5.4	1.6	2.3	5.4	5.6	6.8	2.5	2.7	2.8	2.2	0.8	2	2.1	1.8	3.6	AAEL025083
LOC110675411	0	0	0	0	0	0	0	0.3	0	0	0	0	0	0	0	AAEL026485
LOC110675412	0.4	0.2	0.4	0.1	0.1	0.1	0	0	0	0.8	0.5	0.2	0.2	0	0.1	AAEL023034				GO:0003676	nucleic acid binding
LOC110675413	0.1	0.1	0.1	0	0.1	0	0.4	0.4	0.3	0.1	0.4	0.1	0	0	0	AAEL025767
LOC110675414	0	0	0	0	0	0	0	0	0	0	0	0	0	0	0	AAEL022258
LOC110675415	0	0	0.9	0	0	0	0	0	0	0	0	0	0	0	0	AAEL025129
LOC110675416	0.9	0.1	0.4	1.9	2.6	0.7	2.3	2.5	3.2	0.8	0.9	0.5	0.9	1.8	1.3	AAEL021055
LOC110675417	1.6	1	1.2	0.3	0.1	0.4	0.6	0.8	0.3	0.1	0	0.1	0	0.2	0.1	AAEL023697
LOC110675418	0	1.2	0.4	0.2	1.4	0.6	3.2	4.5	3.2	0.8	2	1	2	1.5	3.1	AAEL020464
LOC110675419	2.4	4.2	1.8	1.1	0.9	1.1	2.6	2.8	2.8	0.4	0.1	0.3	1	0.6	0.4	AAEL021876
LOC110675420	42.3	40.5	42.1	18.2	13.3	14.4	11.6	15.1	11.5	1.1	1.2	1.7	2.6	2.3	3.6	AAEL021308				GO:0003676,GO:0003700,GO:0005634,GO:0006355,GO:0008270,GO:0046872	nucleic acid binding,DNA-binding transcription factor activity,nucleus,regulation of transcription, DNA-templated,zinc ion binding,metal ion binding
LOC110675421	0	0	0	0	0	0	0	0	0	0	0	0	0	0	0.1	AAEL024116				GO:0000786,GO:0003677,GO:0046982	nucleosome,DNA binding,protein heterodimerization activity
LOC110675422	31.6	43.2	36	24.4	21.2	17.1	27.7	31.8	25.3	2.9	3.1	3	7	6.8	7.8	AAEL027616				GO:0003712,GO:0005634,GO:0006357,GO:0016592	transcription coregulator activity,nucleus,regulation of transcription by RNA polymerase II,mediator complex
LOC110675423	0	0	0	0.1	0	0	0	0	0	0	0	0.1	0	0	0	AAEL020660
LOC110675424	0	0	0	0	0	0	0	0	0	0	0	0	0	0	0	AAEL024409
LOC110675425	0	0	0	0	0	0	0	0	0	0.3	0.1	0.7	0	0.2	0	AAEL024257
LOC110675426	0	0	0	0	0	0	0	0	0	0.9	0.6	0.9	0.9	0.4	0.4	AAEL021678				GO:0004252,GO:0006508	serine-type endopeptidase activity,proteolysis
LOC110675427	0.2	0.1	0	0	0	0	0.2	0.1	0.2	0.1	0.2	0	0	0.1	0.1	AAEL023094				GO:0005634,GO:0006915	nucleus,apoptotic process
LOC110675428	2.3	2.1	2.6	1.3	0.6	1.2	0.7	1.4	0.9	0.1	0	0.1	0	0	0	AAEL026648
LOC110675429	0	0	0	0	0	0	0	0	0	0	0	0	0	0	0	AAEL026523
LOC110675430	0.1	0.2	0.5	0.2	0.1	0.2	0.8	0.3	0.3	0.1	0.1	0.1	0.5	0.1	0	AAEL020516
LOC110675432	0	0	0	0.1	0.1	0.1	0.2	0.1	0.4	3.2	3.7	2.4	2.9	1.4	1.4	AAEL025426
LOC110675433	1.4	0	1.5	5.1	7.6	5.7	1.2	1.3	3.1	2.1	3.2	2.2	0.9	2.2	3	AAEL020594
LOC110675434	1.3	1.2	1.8	2.4	3.1	2	3.1	3.7	3.5	0.9	1.3	1.2	2.2	2.7	1.3	AAEL024304
LOC110675435	4.3	3.3	3.6	2	1.4	1.3	0.8	0.7	0.9	0.1	0	0	0	0.2	0.2	AAEL027669
LOC110675436	0	0	0	0	0	0	0	0.2	0	0	0	0	0	0	0	AAEL023160
LOC110675437	0.2	0	0	0	0.2	0	0	0	0	0	0	0	0	0	0.1	AAEL026467
LOC110675438	0.1	0.1	0.1	0.1	0.3	0.1	0.3	0.3	0.3	0.1	0.1	0.1	0.5	0.3	0.2	AAEL026050
LOC110675439	0.2	0.2	0.3	0.3	0.6	0.3	0.4	0.6	0.7	0.1	0.2	0.1	0.6	0.3	0.2	AAEL024992
LOC110675440	0	0	0	0	0	0	0	0	0	0.3	0.1	0.2	2.5	2.6	0.8	AAEL027622				GO:0042302	structural constituent of cuticle
LOC110675441	0	0	0	0.3	0	0	0.2	0.3	4	0.2	0	0	0.4	0	0	AAEL020512	Putative 8.5 kDa secreted protein [Source:UniProtKB/TrEMBL;Acc:Q58HC2]
LOC110675442	0	0	0	0	0	0	0.2	0	0.2	8.7	5.2	4.1	8.2	13.1	7.5	AAEL025118
LOC110675444	0	0	0	0	0	0.4	0	0	0	0	0	0	0	0	0	AAEL023299
LOC110675445	0	0	0	0	0	0	0	0	0	0.5	1.2	0.9	0.6	0.5	0.3	AAEL023853
LOC110675446	0.5	0.3	0.3	0.2	0.2	0.3	0.1	0.4	0.5	0.3	0	0.2	0.3	0.3	0	AAEL026456
LOC110675447	0	0	0	0	0	0	0	0.1	0	0.7	0.8	1.1	0	0.3	0.3	AAEL022994
LOC110675448	9.7	8.5	8.1	0.3	0.4	0.6	0.8	0.6	0.7	0.2	0.2	0.4	0.1	0.2	0.3	AAEL025559
LOC110675449	37.8	99.7	57.9	17.9	17.5	9.5	72.6	67.3	74.5	0.1	0.1	0.2	0.4	0.3	0.4	AAEL026131
LOC110675450	35.1	53.7	17.6	12.7	18.9	10.4	11.3	10.3	12.9	1.7	5.5	1.1	0.5	0.4	0.6	AAEL022847
LOC110675451	0	0	0.3	0	0	0	0.4	0	0	0	0.2	0.2	0	0	0	AAEL027693
LOC110675452	0.1	0	0.2	0.2	0	0	0.4	0.2	0.3	0.1	0.1	0.1	0.1	0.2	0.1	AAEL023738				GO:0003676	nucleic acid binding
LOC110675453	0	0	0.1	0.1	0.1	0.4	0.1	0.8	0.1	5.9	12.8	15.2	13.7	21.3	25.9	AAEL026690
LOC110675454	0.2	0	0	1.1	0	0.1	0.1	0.5	0.3	293.9	458.9	338.3	597.4	948.4	1057.1	AAEL023083
LOC110675455	0.2	0	0.1	0.2	0	0	0	0.3	0	94.2	157.1	134.2	284.7	476	450.1	AAEL025356
LOC110675456	0	0	0	0	0.2	0.1	0.3	0.3	0.1	5	9.7	4.8	5.5	5.1	3.5	AAEL021669
LOC110675457	2.6	2.4	3.8	0.5	0	0.1	0.2	0.1	0.2	0	0.1	0	0	0	0.2	AAEL024402
LOC110675458	2.6	2.4	3.8	0.5	0	0.1	0.2	0.1	0.2	0	0.1	0	0	0	0.2	AAEL020704
LOC110675459	0.3	0.2	0.1	0.4	0.3	0.2	1.5	1.4	1.3	0.2	0.1	0.1	0.1	0	0	AAEL020925
LOC110675460	13.2	13.1	12.4	6	9.4	6.1	30.3	28.4	30.4	2.5	2	1.4	4.1	2.8	3.9	AAEL021183				GO:0007093,GO:1990423	mitotic cell cycle checkpoint,RZZ complex
LOC110675461	0.1	0.2	0.1	0.7	0.2	0.4	0.6	0.5	0.5	0	0	0.3	0	0.2	0	AAEL023614
LOC110675462	0.1	0	0	0	0	0	0	0.1	0	0	0	0	0	0	0	AAEL024215
LOC110675463	0	0	0	0	0.2	0	0	0.2	0.1	0.1	0	0	0	0.3	0	AAEL017998				GO:0009785,GO:0009882,GO:0071949	blue light signaling pathway,blue light photoreceptor activity,FAD binding
LOC110675464	0.2	0.3	0.6	0.8	0.4	0.4	0.1	0	0.2	0	0	0	0	0	0	AAEL025322
LOC110675465	1.1	3.1	5.3	7.1	4.4	3.8	7	8.1	6.3	0.1	0.1	0	0.5	0.1	0.1	AAEL021225
LOC110675466	0	0	0	0	0	0	0	1.1	0.2	50.3	46.4	37.7	713.1	454.4	321.6	AAEL025945				GO:0042302	structural constituent of cuticle
LOC110675467	0	0	0	0	0	0	0	0	0	0	0	0	0	0	0	AAEL020077
LOC110675468	0.4	4.8	1.3	0.1	0.3	0	0.7	0.9	0.5	84.1	99.9	145.4	81.6	64.9	47.4	AAEL024835
LOC110675469	0	0	0	0	0.2	0.1	0.6	0.5	0.4	0	0	0	0	0	0	AAEL027082
LOC110675470	0	0	0	0	0.1	0	0	0	0.1	1.5	1.5	0.9	0.5	0.9	0.4	AAEL026449
LOC110675471	0.6	0.5	0.2	0.4	1	0	1.1	0.8	1	0	0	0.5	0.8	9	4	AAEL020561
LOC110675472	0.4	0.3	0.1	0	0.1	0.2	0.1	0	0.1	0	0	0	0	0	0	AAEL025108
LOC110675473	0.4	0.5	0.1	0.3	0.6	0	1.3	1.4	2.9	0.3	0	0	0.1	0.1	0.1	AAEL023875
LOC110675474	1.4	0.8	0.7	2.4	2.3	2.3	4.8	5.4	5.4	0	0	0	0	0.2	0.3	AAEL024278
LOC110675475	0	0	0	0	0	0	0	0	0	0	0.1	0.1	0	0.1	0	AAEL026379
LOC110675476	0	0.6	0	0	0.2	0.1	0.1	0	0	0	0	0	0	0.1	0	AAEL022798
LOC110675477	0.3	0	0	0.2	0.3	0.5	1.8	0.9	1.1	0.1	0	0.1	0	0	0.1	AAEL021482
LOC110675478	0.7	0.5	1.6	1.3	1.7	1.8	5	3.8	2.9	0	0.6	0.2	0.2	0.5	0.1	AAEL025955
LOC110675479	0.2	0.5	0.5	0.5	0.7	0.6	0.5	0.6	0.6	0.1	0	0	0	0.1	0	AAEL022269
LOC110675480	2.1	1.7	1.8	0.5	0.7	0.2	8.5	7	9.6	0.8	0.6	1	0.1	0.2	0.5	AAEL024718
LOC110675481	0	0	0	1.6	0.8	0.6	1.4	1.2	2.1	0.3	0.3	0	0	0	0.1	AAEL024354
LOC110675482	0.1	0	0	0.1	0.1	0.1	0.5	0.3	0.6	0	0.1	0.1	0	0	0	AAEL020360
LOC110675483	1.7	0	1.1	0.7	0.2	0	1.4	0.4	0	0.3	0.3	0.2	0.2	0.4	0.4	AAEL025941
LOC110675484	0	0	0	0	0	0	0	0	0.1	0	0.1	0.1	0	0.1	0	AAEL021568
LOC110675485	0.5	1.1	0.8	0.7	1.7	0.8	3.9	4.2	3.2	0.2	0	0	0.1	0.1	0.1	AAEL027119
LOC110675486	0	0	0	0	0	0	0	0.1	0	0.1	0	0.1	0	0	0	AAEL022202				GO:0005739,GO:0005747	mitochondrion,mitochondrial respiratory chain complex I
LOC110675487	163.3	140.6	147.1	106.1	61	98.2	79.2	89	72.9	10.3	9.6	9.1	11.7	8.6	13.6	AAEL027991
LOC110675488	0	0	0	0	0	0	0.7	0.7	0.7	0	0	0	0	0	0	AAEL023333
LOC110675489	0	0.4	0.3	1	0.8	0.4	1.1	0.9	0.4	0.5	0.4	0.1	0.3	0.2	0.1	AAEL026795
LOC110675490	0.6	0.4	0.3	0.6	0.4	0.7	0.7	0.7	0.7	0.1	0.1	0	0.3	0.2	0.5	AAEL026559
LOC110675491	0	0	0.3	0	0	0	0.1	0.5	0	0	0.1	0.3	0.3	0	0	AAEL027142
LOC110675492	0	0	0	0	0	0	0.1	0.1	0.1	0.1	0	0	0	0	0	AAEL023469
LOC110675493	1773.4	1734.5	1578.3	3338	3259.7	3064.1	1585.1	1556.2	1711.4	2433.1	2488	2607.4	1645.1	1545.9	1512.9	AAEL028043	60S ribosomal protein L28, putative [Source:UniProtKB/TrEMBL;Acc:Q1HRJ1]			GO:0003735,GO:0005840,GO:0006412	structural constituent of ribosome,ribosome,translation
LOC110675494	0	0	0.2	0	0.2	0	0.1	0	0	6.5	14.9	3.3	29.4	25	22.9	AAEL024334
LOC110675495	0	0	0	0.3	0	0	0.4	0	0	0.7	0.8	0.9	0.4	2.1	1.1	AAEL024781
LOC110675496	0.5	0.5	0.6	0.3	0.4	0.4	0.2	0.1	0	0	0	0	0.1	0	0	AAEL021069
LOC110675497	0.8	0.2	0.6	1	0.7	0.2	2.7	1.4	0.8	1.2	1.1	0.4	2	2.8	2.8	AAEL026629
LOC110675498	23.3	21.5	24.7	12.9	12.3	11.5	7.4	7.6	5.5	0.9	0.8	1	1.7	1.8	2.1	AAEL023076				GO:0003676	nucleic acid binding
LOC110675499	0.1	0	0	0.2	0.2	0	0	0.3	0.5	0	0	0	0	0	0	AAEL021723
LOC110675500	0	0	0	0	0.1	0	0.2	0.3	0	0	0	0	0.1	0	0	AAEL022740
LOC110675501	0	0	0	0.1	0.1	0	0.1	0.2	0	0.1	0.1	0	0.1	0	0	AAEL026877
LOC110675502	0	0	0.1	0	0.1	0	0.1	0	0.2	0.3	1.2	5.7	5.1	5.4	2.1	AAEL023854
LOC110675503	0	0	0	0	0	0	0	0	0	0	0	0	0	0	0	AAEL020037
LOC110675504	0.7	0.7	0.7	0.2	0.2	0.2	0.9	1.1	0.7	0.3	0.2	0.3	0.2	0.4	0.4	AAEL024647
LOC110675505	0.8	0.8	0.8	0.2	0.2	0.3	0.9	1.1	0.7	0.3	0.2	0.3	0.2	0.4	0.5	AAEL020926
LOC110675506	8.2	7.5	7.3	6.9	7.5	7.2	3.4	3.6	5.2	4.3	5.3	4.2	2	1.2	2.2	AAEL026119
LOC110675507	2.6	1.8	2.2	0.7	1.4	1.6	3.7	4.2	3.4	0.4	0.5	0.3	0.5	1.3	0.9	AAEL022507
LOC110675508	0	0	0.1	0	0	0	0	0	0	0	0	0.1	0.1	0	0	AAEL027032
LOC110675509	0.2	0.1	0	0.1	0	0.1	0.3	0.5	0.3	0	0	0	0.2	0	0	AAEL023442
LOC110675510	0.2	0.1	0	0.1	0	0.1	0.3	0.5	0.3	0	0	0	0.2	0.1	0	AAEL023355
LOC110675511	0.7	0.2	0.5	0	0.1	0	0.4	0.3	0.2	0	0	0	0.2	0.1	0.4	AAEL027971
LOC110675512	1.7	0.9	1.9	9.9	0.9	1.1	1.2	1.3	1.2	0.4	1.1	0.2	1.5	0.4	1.3	AAEL020727
LOC110675513	5.9	0.8	2.5	28.3	34.4	18.2	301.6	215.1	260.7	2.5	4.3	2	0.6	0.3	0.1	AAEL024984
LOC110675514	0.8	0.4	0.4	1.1	0.7	0.9	2.5	3.1	2.3	2.6	4.2	3.2	1.4	1.6	1.1	AAEL021546
LOC110675515	0.4	1.1	0.7	0.6	0.7	0.4	2.5	2.4	2.4	0.3	0.3	0.3	0.7	0.7	0.8	AAEL026079
LOC110675516	10.5	7.4	8.5	7.9	6.9	7.7	1	1	0.8	0.2	0	0	0.2	0	0	AAEL026793
LOC110675517	0.1	0.1	0.1	0.1	0	0	0	0.1	0.1	0.2	0.2	0.2	0.3	0.1	0.5	AAEL023677				GO:0003676,GO:0003746,GO:0004252,GO:0006414,GO:0006508,GO:0016491,GO:0016627,GO:0050660,GO:0055114	nucleic acid binding,translation elongation factor activity,serine-type endopeptidase activity,translational elongation,proteolysis,oxidoreductase activity,oxidoreductase activity, acting on the CH-CH group of donors,flavin adenine dinucleotide binding,oxidation-reduction process
LOC110675518	0.8	2.3	1	0.7	0.9	0.5	2.3	2.1	2.4	0.1	0.1	0.1	0.2	0.1	0.1	AAEL027950
LOC110675519	1.3	0.6	2.6	5	6.7	2.1	18.6	20.6	21.6	42.1	47	39.6	42	39.4	31.2	AAEL020128				GO:0005515	protein binding
LOC110675520	14.1	13.6	6	168.9	220.8	333	10.9	9.2	8.6	0.2	1.2	1.2	1.6	4.2	0.1	AAEL024417
LOC110675521	126.1	118	111.7	67.3	91.6	75.4	116.9	101.3	110.7	6.2	6.5	5.8	18.5	14	15.3	AAEL020929				GO:0000166,GO:0003677,GO:0005524,GO:0006260,GO:0016887	nucleotide binding,DNA binding,ATP binding,DNA replication,ATPase activity
LOC110675522	0	0	0	0	0	0	0.1	0	0	0	0	0	0	0	0	AAEL027310
LOC110675523	0	0	0	0	0	0	0	0	0	0	0	0	0	0	0	AAEL023793
LOC110675524	3.5	1.8	2.3	1.5	1.3	0.9	0.4	0.3	0.2	0.6	0.5	0.7	0.7	0.6	1	AAEL026224
LOC110675525	465.3	334.6	400.7	329	83.3	144	0.7	0.6	0.4	0.5	0.3	0	0.1	0.6	0.1	AAEL025435
LOC110675526	0	0	0	0	0	0	0	0	0	3.1	3.3	2.2	1.7	2.2	2.9	AAEL021586				GO:0005515	protein binding
LOC110675527	0.6	0.9	0.9	1.4	0.9	0.9	3.4	3.7	3.7	3.5	2.7	2.2	2.5	2.3	2.9	AAEL026060				GO:0005515	protein binding
LOC110675528	7.8	10.6	9.4	3.3	2.3	3.4	2.1	2	1.6	0	0	0	0.1	0.1	0	AAEL020710
LOC110675529	0	0	0	0	0	0	0.1	0	0.1	0	0	0	0	0	0	AAEL027511				GO:0003677	DNA binding
LOC110675530	0	0	0	0	0	0	0	0	0.2	6	3.2	3.8	2.9	1.5	5.1	AAEL020890
LOC110675531	0	0	0	0	0	0.1	0.4	0	0.1	5.7	4.2	4	1.5	1.1	2.4	AAEL024237
LOC110675532	0	0	0	0	0	0	0.1	0.1	0	1.3	1	1.1	0.7	0.5	1	AAEL012634				GO:0005515	protein binding
LOC110675534	0.2	0.5	0.6	0.9	0.4	0.3	0.1	0	0.1	0	0	0.1	0	0	0	AAEL026765
LOC110675535	4.8	1	3.8	16.1	28.3	9.9	91.2	83.1	93.8	102.4	130.2	162.7	276.4	382	167.3	AAEL024066
LOC110675536	0	0	0	0	1.2	0.5	0.3	0.8	0	0	0.1	0	0	0	0	AAEL027526
LOC110675537	0.4	0.4	0.4	0.2	0	0.2	0.4	0.3	0.1	0	0	0	0.1	0.1	0	AAEL020731				GO:0003676,GO:0008270	nucleic acid binding,zinc ion binding
LOC110675538	0	0	0	0.3	0.3	0.2	0.2	0.2	0.2	0	0	0	0	0.1	0	AAEL024347
LOC110675539	1.8	9	2.2	0.3	0.7	0.5	0.6	0.5	0.7	0	0	0	0	0	0	AAEL021636
LOC110675540	0	0.1	0	0.2	0	0	0	0	0.1	0	0	0	0	0	0	AAEL024859
LOC110675541	0	0.5	0.3	0.1	0.2	0.2	1	0.9	0.7	0.3	0.1	0.4	0.4	0.1	0.6	AAEL020228
LOC110675542	10.1	5.7	7	25	24.8	18.5	61.4	49.1	64.6	4.3	5.7	3.7	13.1	6.4	8.4	AAEL023449
LOC110675543	0.6	0	0.3	1.5	2.4	1.2	1.4	1.7	1.3	0.2	0.1	0.4	0	0	0	AAEL027156
LOC110675544	0.1	0	0.1	0	0	0	0	0.1	0	0	0	0.2	0	0	0	AAEL022563
LOC110675545	0.1	0.1	0	0	0	0	0.2	0.1	0.1	0	0	0	0	0	0	AAEL025823
LOC110675546	0.1	0	0	0	0	0	0.1	0.1	0.1	0	0	0	0	0	0	AAEL021247
LOC110675547	0.2	0	0	0	0	0.2	0.1	0	0.1	0	0	0	0	0.1	0.1	AAEL024723
LOC110675548	0	0	0	0	0	0	0	0	0.1	0	0	0	0	0	0	AAEL028175
LOC110675549	0.4	0	0.2	0.3	0.3	0.1	0.5	0.3	0.4	0.2	0	0.1	0.6	0.8	1	AAEL023683
LOC110675550	0.4	0.4	0.8	1.4	1.3	1.4	1.7	1.5	1.1	0.1	0.2	0	0.2	0.3	0.2	AAEL022683
LOC110675551	1	3.6	3.5	0.4	1.9	2.9	1.7	3.2	2.3	7	7.6	5.8	1.5	1.8	2.7	AAEL027144
LOC110675552	0.5	0	1.8	0.9	0.6	1.6	1.3	2	2	0	0.4	0	0.6	0.1	2.4	AAEL022541
LOC110675553	0.3	1.5	0	0	0.6	0.9	0	0	0.2	0	0	0.2	0	0	0	AAEL021943
LOC110675554	111.9	78.2	84.9	41.9	35.5	52.6	6.2	6.7	5.2	0.2	0.1	0	0.4	0.3	0.2	AAEL025499
LOC110675555	0.1	0.3	0.2	2.1	2.1	1.4	3.5	3	4.1	0.7	1.8	0.5	2.1	2.1	2	AAEL020767
LOC110675556	2.4	2.9	1.6	1.7	2.2	0.9	0	0.6	0.7	0.1	0.1	0.2	0.1	0	0	AAEL024369
LOC110675557	0	0.1	0.1	0.1	0	0	0.2	0.1	0.1	0	0	0	0	0.1	0.1	AAEL023704
LOC110675558	4.9	0.6	4.8	11.7	12.5	6.7	32.6	30.2	34.4	1.5	0.3	2.2	9	8.6	3.5	AAEL028195
LOC110675559	2.9	7.4	3.1	7.6	11.2	7.5	4.6	4.5	5.6	0.7	1.5	0	1.3	0.7	1.9	AAEL023659
LOC110675560	28.4	31.1	31.2	10.7	2.6	4.2	2.7	1.9	1.3	0	0	0	0.2	0.2	0.1	AAEL023968
LOC110675561	1.8	2.4	1.6	2.5	3.7	2.9	3	2.3	2.2	0.8	0.8	0.8	0.6	0.2	0.7	AAEL020423
LOC110675562	34.4	31.3	34.6	23.5	30.2	29.3	7.7	8.2	7.2	0.1	0.2	0.1	0.8	0.5	0.6	AAEL027087				GO:0016274,GO:0018216	protein-arginine N-methyltransferase activity,peptidyl-arginine methylation
LOC110675563	0	0	0	0	0.1	0	0.1	0.1	0	19.5	25.7	23.7	20.1	17.8	27.5	AAEL023481
LOC110675564	0.1	0	0.1	0	0.1	0	0.1	0.2	0.1	0.7	1.5	1.6	1.7	1.5	1.1	AAEL025731
LOC110675565	9.6	12	9.4	5.8	2.7	2.5	2.3	2.1	1.6	0.1	0.1	0.2	0.5	0.5	0.4	AAEL022338
LOC110675566	0	0	0	0.2	0.1	0	0.3	0.1	0.1	0	0.1	0	0.1	0	0	AAEL021336
LOC110675567	0	0	0	0	0.2	0.2	0.6	0	0.2	0	0	0	0	0	0	AAEL025147
LOC110675568	2.8	2.9	3.5	4.9	10.8	6.2	12.3	14.1	13	1.5	1.6	1.4	3.9	3.8	2.5	AAEL022382
LOC110675569	0	0	0	0	0	0	0	0	0	1.1	8.6	4.3	7.1	4.8	9.3	AAEL026016
LOC110675570	0.1	0.3	0.2	0	0.1	0	0.2	0.3	0.2	0.1	0.1	0.1	0.2	0.3	0.2	AAEL026336				GO:0003676,GO:0003677	nucleic acid binding,DNA binding
LOC110675571	1.9	0.8	0.9	1.2	8.3	3.1	3	2.3	2.6	0.7	0.9	0.3	25.4	12.2	22.1	AAEL023709
LOC110675572	0.5	0.1	0.6	1.5	0.9	0.7	2.7	2.7	1.9	0.6	0.7	0.8	0.2	0.8	0.3	AAEL023926
LOC110675573	21.9	15.8	29.1	57.3	54.8	44.1	127.9	126.1	138.1	1	0.6	1	2	1.2	1.1	AAEL027407
LOC110675574	0	0	0	0	0	0	0	0	0.2	0	0	0	0	0	0
LOC110675575	0	0	0.1	0.1	0	0	0	0.1	0	0	0	0.1	0	0	0	AAEL026266
LOC110675576	0.2	0.6	0.3	0.1	0.2	0.2	0.5	0.7	0.5	0.1	0.1	0.2	0.2	0.4	0.5	AAEL022079
LOC110675577	41	31.7	33.4	32	33.7	28.4	5	4.9	6.6	2.2	2.9	5.1	6.6	8.3	3.7	AAEL019884
LOC110675578	0.9	3	1.6	0	0.6	0	4.7	2.6	4.8	0.4	0.7	1.2	1.3	1	1.8	AAEL020883
LOC110675579	0.1	0	0.1	0	0	0	0	0	0	0	0	0.1	0	0	0.1	AAEL024445
LOC110675580	0	0.1	0.1	0.5	1.1	0.7	0	0	0	0	0	0	0	0	0	AAEL014018
LOC110675581	0.1	0.1	0.1	0	0	0	0	0	0	0	0	0.1	0	0	0.1	AAEL025338
LOC110675582	32.4	28.8	33.8	23.1	18.8	19.3	29	29.7	23.9	23	20.4	21.3	14.7	14.3	16.4	AAEL025065
LOC110675583	0	0	0.2	0	0.6	1.5	0.4	0	0.5	0	0	0	0	0	0	AAEL020312
LOC110675584	0	0	0	0.1	0.1	0	0.1	0.1	0.1	0	0.1	0	0.1	0	0	AAEL027525
LOC110675585	0	0	0.2	0	0	0	0	0	0	0.1	0.6	0.5	0	0.4	0	AAEL024048
LOC110675586	0	0	0	0	0.1	0	0	0	0	0.3	0	0.1	0.1	0.2	0.1	AAEL026179
LOC110675587	0.1	0.1	0.1	0	0.3	0.3	0.5	0.8	0.3	0	0	0	0	0	0.1	AAEL021633
LOC110675588	0	0	0.1	0.5	0.4	0.2	0.3	0.3	0.5	0.1	0.1	0.2	0.3	0	0	AAEL024285
LOC110675589	0.9	3.5	1.7	0.2	0	0.5	0	0.4	0.3	0	0	0	0	0	0	AAEL020711
LOC110675590	39.1	28.1	49	116	129.8	71.7	83.9	97.5	92.9	3.9	3.8	4.7	28.2	29.2	35.1	AAEL023158
LOC110675591	0	0	0.2	0	0	0	0	0.2	0.1	0.6	0	0	0.1	0	0	AAEL026583
LOC110675592	0	0	0	0	0.2	0.2	0.6	0	0.2	0	0	0	0	0	0	AAEL026366
LOC110675593	25.4	21.3	21.6	12.3	9	9.9	5.1	5.2	5.2	3.9	8.5	3.4	3.8	1.8	3.1	AAEL023552				GO:0000166,GO:0005525,GO:0005739,GO:0005743,GO:0016020	nucleotide binding,GTP binding,mitochondrion,mitochondrial inner membrane,membrane
LOC110675594	0	0.3	0.2	0.1	0.2	0	0.1	0.1	0	0.1	0	0.2	0.1	0.2	0.1	AAEL027126
LOC110675595	0.2	0.4	0.3	0.3	0.2	0.1	0.3	0.4	0.3	0	0.1	0	0.1	0	0.2	AAEL022614
LOC110675596	109.7	331.1	275.6	60	91.9	37.3	431.7	434.5	414.7	14.3	17.9	16	22.6	27.6	19.2	AAEL020445
LOC110675597	0.1	0	0	0	0	0	0	0	0	0	0	0	0.1	0.1	0	AAEL025809
LOC110675598	3.3	5	3.8	2.8	3.7	3	2.2	3	2.6	0.6	0.6	0.4	0.3	0.3	0.4	AAEL027426
LOC110675599	0.1	0.1	0.2	0.1	0.1	0.1	2	1.1	1.9	17.3	20.3	31.4	3.7	6.4	4.2	AAEL024870				GO:0016747	transferase activity, transferring acyl groups other than amino-acyl groups
LOC110675600	0.3	0.7	0.3	1.9	1.7	1.2	3.5	3.9	4.1	0.9	1.8	0.4	2.5	2.7	2.2	AAEL021818
LOC110675601	41.5	37.3	34.4	28.2	23.3	23.3	18.8	18.6	18.7	1.9	2.4	2.2	3.7	2.9	4	AAEL025376				GO:0003676	nucleic acid binding
LOC110675602	0	0	0	0	0.2	0	0	0	0	5.1	3.3	3.5	2.7	10.6	5.5	AAEL022962
LOC110675603	0	0	0	0	0.2	0	0	0	0	5.1	3.3	3.5	2.7	10.6	5.5	AAEL026594
LOC110675604	0	0	0	0	0.2	0	0	0	0	2.1	2.6	2.7	1.7	5.1	2.8	AAEL024193
LOC110675605	0	0	0	0	0	0	0.6	0.5	0	0	0.1	0	0	0.3	0	AAEL027634
LOC110675606	0.4	0.3	1.3	3	2.9	2.1	1.5	1.2	1.1	2.2	8.4	4	0.6	0.3	1.9	AAEL023313
LOC110675607	0.2	0	0	0.1	0	0	0.1	1.2	0.9	612.3	389.9	289.9	3218.4	1927.8	6826.9	AAEL020585
LOC110675608	0	0	0	0.5	0.8	0.4	0	0	0	2.5	1.4	2	2.9	1.7	2.1	AAEL024460
LOC110675609	3.2	1.6	2.1	12.9	20	6.3	18	23.4	32.1	25.2	18.7	25.4	59.1	41.9	42.7	AAEL021795
LOC110675610	36.7	30.7	36.7	23.4	29.4	14.5	8.1	12.7	11.8	74.1	79.1	94.6	322.6	274	226.2	AAEL026008
LOC110675611	3.2	4.8	6.5	4.7	5.9	2.6	4.3	9.3	10.5	30.9	32.5	38	96	74.8	56.7	AAEL026833
LOC110675612	3.7	3.5	5.1	14.9	10.3	3.4	3.2	6.2	4.4	3320.7	2866.4	3564.4	1932.6	1479	2870.6	AAEL022334
LOC110675613	249.6	209.8	239.9	139.9	109.7	141.6	137.5	140.9	127.5	164	172.6	154.8	35.8	35.1	33.5	AAEL021473				GO:0003677,GO:0005829	DNA binding,cytosol
LOC110675614	177.9	179.5	151.1	101.2	93.8	98.6	113	99.8	117.8	6.6	8.7	7	41.4	24.6	37.3	AAEL022774				GO:0005634	nucleus
LOC110675615	0	0	0	0	0	0	0	0	0	0	0	0.2	0	0.1	0	AAEL026195
LOC110675616	6.4	7.1	7.7	2.9	1.8	2	4.5	6.3	4.1	1.4	1.4	1.3	2.4	4.6	4.4	AAEL023898
LOC110675617	2.7	3.7	4.9	2	1.2	0.8	3.3	5.2	3.5	0.8	1.4	0.9	1.6	3	3.2	AAEL027381
LOC110675618	0.4	1	0.9	1	1.3	1	0.8	1.8	1.1	0.2	0.3	0.2	0.2	0.4	0.6	AAEL023460
LOC110675619	0.5	1.3	1.4	1.6	1.9	1.5	1.4	2.1	1.8	0.3	0.4	0.2	0.4	0.5	0.9	AAEL025160
LOC110675620	2.6	3.6	2.1	0	0.7	0.5	5	3.2	3.4	1.5	0.8	1.1	2.1	1.3	0.6	AAEL024790
LOC110675621	0.8	0.7	0.9	0.4	0.9	0.4	3.9	3.9	4.3	0.5	0.1	0	0.2	0.2	0	AAEL027234
LOC110675623	0	0.3	0	0	0	0	0	0	0	0	0	0	0	0	0.2	AAEL023480
LOC110675624	0.3	0	0.6	1.9	3.5	0.9	1.3	1	1.1	0	0.3	0.2	2.3	1.5	1	AAEL021857
LOC110675625	0.2	0.7	0.7	1.9	2.7	0.6	2.1	3	3.6	0.5	0.3	1.1	0.2	0.3	0.2	AAEL024507
LOC110675626	0.7	0.2	1	0.2	0.4	0.4	0.1	0.2	0.1	0	0	0	0	0	0	AAEL026277
LOC110675627	0	0	0	0	0.1	0	0	0	0	0	0	0	0	0.1	0	AAEL022696				GO:0004984,GO:0005549,GO:0007608,GO:0016020	olfactory receptor activity,odorant binding,sensory perception of smell,membrane
LOC110675628	0	0.2	0	0.1	0	0	0.2	0.1	0.1	0	0.1	0	0	0	0	AAEL027448
LOC110675629	0	0	0	0	0	0	0	0	0	0	0	0	0	0	0	AAEL023846				GO:0005737,GO:0030030	cytoplasm,cell projection organization
LOC110675630	0.1	0.2	0	0	0.2	0.1	0.1	0.1	0.3	0	0.1	0	0	0	0	AAEL027226
LOC110675631	0	0	0	0	0.2	0	0	0	0	0	0	0	0	0	0	AAEL022730
LOC110675632	0.2	0	0	0	0.3	0.7	0	0	0	0.4	0.4	1.1	62.5	316.6	92.1	AAEL025106				GO:0042302	structural constituent of cuticle
LOC110675633	0	0	0	0	0	0.2	0	0	0	0	0	0	0	0	0	AAEL020475
LOC110675634	96	102.4	86.4	42.6	56.4	47.2	76.5	63.4	81.6	5.9	6.1	4.3	15.3	11.8	24.5	AAEL021952				GO:0005634	nucleus
LOC110675635	0	0	0	0	0	0	0	0	0	0	0	0	0	0.2	0	AAEL025492
LOC110675636	0.2	0.5	0.2	0.3	0.2	0.1	0.4	0.3	0.3	0	0	0	0	0.1	0	AAEL026882
LOC110675637	6.9	6.6	4.8	8.2	5	4.5	0.5	0.7	1.1	3.8	3.8	3.1	5.2	3.2	4.4	AAEL022351
LOC110675638	1.8	0.8	2	0.3	0.3	0.4	0	0	0.3	0	0	0	0	0.3	0.3	AAEL022836
LOC110675639	1.5	0.5	0.4	0.9	0.2	0.2	0.3	0	0.1	0.1	0	0	0	0	0	AAEL026370
LOC110675640	0.1	0.5	0	0	0	0	0.1	0	0.1	0	0	0	0.2	0	0	AAEL020742
LOC110675641	0.1	0.3	0.1	0.1	0	0.1	0	0.1	0.2	0.1	0.2	0.1	0.3	0.4	0.5	AAEL020456
LOC110675642	0.4	0.1	0.1	0.4	4.6	2.6	0.1	0.2	0.3	0	0	0	0.3	0.3	0.1	AAEL024071
LOC110675643	14.4	15.6	12.3	4.1	6.8	4.6	19	17.5	19.9	6.7	6.8	6.7	5.6	4.7	6.2	AAEL004896				GO:0002098,GO:0005515,GO:0005634,GO:0005737,GO:0008033,GO:0033588	tRNA wobble uridine modification,protein binding,nucleus,cytoplasm,tRNA processing,Elongator holoenzyme complex
LOC110675644	0.4	0.1	0.1	0.2	0.1	0.1	0.7	0.6	0.5	0.1	0	0	0	0.1	0.2	AAEL023213
LOC110675645	1	0.3	0.4	0.4	0.2	0	0	0	0.3	0	0	0	0	0.2	0.1	AAEL026590
LOC110675646	0.1	0.2	0.1	0.1	0	0	0.2	0.4	0.2	0.3	0.2	0.4	0.1	0.1	0	AAEL023162
LOC110675647	0	0	0	0	0	0	0	0	0	0	0	0	0	0	0	AAEL027476
LOC110675648	0.8	0.3	0.6	0.5	0.2	0.7	4	5.5	4.7	1.8	2.3	1.6	0.8	1.8	0.9	AAEL024014
LOC110675649	0	0	0	0	0	0	0	0	0	0	0	0	0	0	0	AAEL024099
LOC110675650	0	0	0	0	0	0	0	0	0	0	0	0	0	0	0.1	AAEL023733
LOC110675652	0.4	0.2	0.2	0.3	0.8	0.8	0.1	0	0	0.5	0.8	0.3	0.9	0.3	0.8	AAEL027655
LOC110675653	0.1	0.4	0.6	0.2	0.1	0.1	0.3	0.2	0.2	0.2	0.2	0.4	0.2	0.1	0.1	AAEL022378				GO:0003676,GO:0003677	nucleic acid binding,DNA binding
LOC110675654	0	0	0.1	0	0.1	0.2	0.1	0.2	0.3	0	0	0	0	0	0	AAEL026514
LOC110675655	0.4	0.6	0.3	0.8	1.7	1.4	1	1.3	1.2	0.3	0	0.4	0.3	0.4	0.2	AAEL021002
LOC110675656	10.5	12	11.5	8.3	8.9	9.6	10.7	9.7	9.4	2.7	4.2	4.8	5.4	5	7.3	AAEL018011				GO:0005509,GO:0005515	calcium ion binding,protein binding
LOC110675657	29	60.5	58.1	34.3	45.9	23.4	119.1	122.4	120.8	8.3	9.7	11.7	34.5	29.5	35.8	AAEL023802
LOC110675658	0	0.2	0.3	0.7	0	0.5	0.2	0	0.4	0.4	0.3	0.2	0.1	0.2	0.2	AAEL027223
LOC110675659	0.2	0.7	0.2	0.1	0.4	0.2	0.4	0.3	0.2	0	0	0	0.2	0.1	0.2	AAEL027588
LOC110675660	0.2	0.2	0	0.9	1.5	0.5	0.7	1.2	0.9	3.8	1.2	1.7	1.2	2.1	2.2	AAEL027807
LOC110675661	0	0	0	0.6	0	0	0	0	0.2	0	0	0	0	0	0	AAEL021680
LOC110675662	0	0	0	0	0.1	0	0	0.1	0	0.1	0	0	0.2	0	0	AAEL025127
LOC110675663	0	0	0	0.3	0.1	0	0.2	0.3	0	0	0	0	0.1	0	0	AAEL026669
LOC110675664	0	0	0.1	0	0	0.1	0	0.1	0	0	0.2	0	0	0	0	AAEL025952
LOC110675665	0.6	0.4	0.6	0.4	1.5	0.9	1.5	1.4	0.9	7.2	5.6	4.7	1.1	0.8	1	AAEL028005				GO:0035556	intracellular signal transduction
LOC110675666	0.2	0.6	1.1	0.5	1	0.2	0	0.5	0	0	0	0	0.1	0	0	AAEL023507
LOC110675667	360.9	314.4	329.2	293.4	216.1	303.8	217.8	204	208.7	180	186	176.5	152.3	147.6	126.1	AAEL024853				GO:0005741,GO:0006886	mitochondrial outer membrane,intracellular protein transport
LOC110675668	1.7	3.5	2.5	0.4	0	0.1	0.1	0.1	0.2	0	0.1	0	0	0	0.2	AAEL020224
LOC110675669	3.7	2.9	3.1	2.9	2.3	0.9	1.5	2	2.3	0.7	0	0.6	2	2.1	1.4	AAEL022134
LOC110675670	0	0	0	0	0	0	0	0	0	0	0	0	0	0	0	AAEL022937
LOC110675671	0	0	0	0.1	0.1	0	0.1	0.1	0	0	0	0	0.1	0	0	AAEL020943
LOC110675672	9.2	11.8	7.2	9.2	8.8	9.5	4	4.2	3.7	0	0.1	0	0	0.1	0	AAEL024296
LOC110675673	0	0	0.4	0	0	0	0.4	0.4	0.4	0	0	0	0	0.2	0	AAEL021794
LOC110675674	0.4	0.1	0.3	0	0.3	0	0	0.3	0.2	0	0.2	0	0.1	0.7	0.1	AAEL025354
LOC110675675	0.3	2.8	1.7	7.1	7.2	4.8	6.9	7	9	0.2	0.2	0	0.4	0	0.2	AAEL022267
LOC110675676	1.4	0.6	1.1	4.3	3.3	2.5	4.6	7.4	7.1	0.1	0.2	0.5	2.5	0	1	AAEL026524
LOC110675677	1.5	3.4	3.3	3.2	1.7	0.9	2.5	3.1	0.9	0	0	0	0	0.2	0	AAEL024001
LOC110675678	0	0.2	0	0	0.1	0	0.2	0	0	0	0	0	0	0	0	AAEL027651
LOC110675679	0.2	0.4	0.7	0.3	0.5	0.4	0.6	0.8	0.6	0.1	0	0	0.2	0.2	0.2	AAEL026103
LOC110675680	11.9	11.7	11	7.2	7.6	6	3.9	4.3	3.9	1.2	1.4	1.4	4.4	3.2	4.8	AAEL027733
LOC110675681	31.8	32.3	42	34.9	24.6	21.8	19.2	19.8	20.2	3.8	3.2	3.8	5.4	4.5	5.3	AAEL019645				GO:0003676,GO:0005634,GO:0008270	nucleic acid binding,nucleus,zinc ion binding
LOC110675682	6.7	5.7	7.7	9.1	6.1	2.6	16.9	17.7	17.9	2.2	2.7	2.1	4.2	3.6	5	AAEL023280				GO:0003676,GO:0005634,GO:0008270,GO:0046872	nucleic acid binding,nucleus,zinc ion binding,metal ion binding
LOC110675683	0	0.2	0.1	0.2	0	0	0	0.2	0.1	0	0.1	0	0.1	0	0	AAEL021918
LOC110675684	0	0	0	0.1	0	0	0.4	0.5	0.7	0	0	0	0	0.1	0.1	AAEL024422
LOC110675685	2.2	1	1.2	0.8	1.3	0.9	0.9	1.5	0.9	0.1	0.4	0.3	0.4	0.2	0.3	AAEL025741
LOC110675686	2.2	2.2	5.1	2	1	0.9	0.7	0.9	0.3	0	0	0	0	0	0	AAEL022115
LOC110675687	4.3	2.2	4.7	8.2	3.4	2.1	1.3	1.9	1.5	0	0	0	0	0	0	AAEL026870
LOC110675689	0.3	0	0.2	0	0	0	0.4	0.5	0.4	0	0	0	22.5	238	115.6	AAEL023487				GO:0042302	structural constituent of cuticle
LOC110675690	0.2	0	0.1	0.1	0.1	0.3	0.6	0.6	0.3	0	0	0	0	0	0	AAEL023887
LOC110675691	0.3	0.2	0.3	0.5	1.2	0.4	0.7	0.9	1.1	0.1	0.2	0.1	0.3	0.3	0.2	AAEL021684
LOC110675692	0.3	0.2	0.2	0.4	0.5	0.5	0.4	0.5	0.4	0	0.1	0.1	0.1	0.1	0.2	AAEL024375
LOC110675694	0.3	0	0.1	0	0.2	0.3	0.1	0	0.3	0.1	0	0.1	0	0.2	0	AAEL025263
LOC110675695	0	0	0	0	0	0	0	0	0	0	0	0	0	0	0	AAEL022719
LOC110675696	0.8	0.8	0.8	0.8	0.8	1	0.6	0.9	0.8	0	0	0	0	0	0	AAEL021512
LOC110675697	0.2	0.5	0.2	0.4	0.3	0	0.1	0.3	0.1	0.2	0.1	0	0.1	0.2	0.1	AAEL023857
LOC110675698	0	0.1	0	0.2	0.2	0.9	0	0	0.1	0	0.1	0	0.1	0.1	0.1	AAEL026255
LOC110675699	0	0	0	2.3	3.1	3.6	0.9	0.4	1.3	0.3	0.2	0	1.3	0.6	0.7	AAEL024482
LOC110675700	1.3	0.5	0.7	0.2	1.1	1.2	1.1	1.6	1.9	0.2	0	0.8	0.2	0.4	0.3	AAEL024729
LOC110675701	0	0.2	0	1	4.5	4.2	4.3	5.3	3.5	1.1	0.4	0.3	0	0	0	AAEL023405
LOC110675702	0.2	0.3	0.5	0.1	0.1	0.3	0.2	0.3	0.1	0	0.1	0	0	0.1	0	AAEL027976
LOC110675703	0	0.3	0.4	0	0	0	0	0.1	0.1	0.1	0.1	0.1	0.2	0.1	0.1	AAEL022144
LOC110675704	0	0	0	0	0	0	0	0	0.7	0.2	0	0	0	0	0	AAEL026335
LOC110675705	0.3	0	0.6	1.8	2.4	1.8	3.6	4.4	4	0.2	0.1	0	0.6	0.5	0.4	AAEL022924
LOC110675706	0.4	0	0	0.3	0.3	0.8	0	0	0	0.2	0	0.2	0	0	0.8	AAEL021508
LOC110675707	0.1	0.5	0.8	0.5	0.9	0.5	1.6	1.1	2.2	0	0	0	0	0	0.2	AAEL025963
LOC110675708	2.8	1.5	2.7	0	0.5	0.6	1.1	0.9	1.3	0.1	0.1	0.1	0.7	0.3	0	AAEL023245
LOC110675709	0	0.1	0	0.1	0.1	0	0.4	0.5	0.5	0	0.2	0	0	0	0.1	AAEL027871
LOC110675710	0.4	0.4	1.2	0.1	0.4	0.6	1.6	1.8	1.6	0.5	0.6	0.7	1.4	1.7	1.6	AAEL024478
LOC110675711	0	0	0.1	0.2	0.2	0.1	1.4	1.4	0.8	0.2	0.6	0.7	2.7	10.6	5.2	AAEL020676				GO:0005549	odorant binding
LOC110675712	0.1	0.1	0	0	0.2	0	0.1	0	0	0	0.1	0	0	0	0.1	AAEL025625
LOC110675713	0	0	0	0	0	0	0	0	0	0	0	0	0	0	0	AAEL021872
LOC110675714	1.7	1.4	1.9	3.4	2.3	1.6	1.6	1.6	1.5	0.2	0.3	0.7	1.6	4.5	2.7	AAEL023615
LOC110675715	0.2	0	0.1	0	0.2	0.1	0	0	0.1	1.9	1.5	1.6	1.6	2	1.6	AAEL028210				GO:0008488,GO:0016020,GO:0016021,GO:0017187	gamma-glutamyl carboxylase activity,membrane,integral component of membrane,peptidyl-glutamic acid carboxylation
LOC110675716	0	0.1	0	0	0	0.1	0.1	0.2	0.1	0	0.1	0	0	0.1	0.1	AAEL023696
LOC110675717	0.2	0	0.2	0.3	0.3	0	0.2	0.3	0.2	0.1	0	0	0.1	0	0.2	AAEL024212
LOC110675718	0.3	0.2	0.2	0.1	0.1	0.1	1	0.7	0.9	13.7	18.3	14.2	20.3	25.1	15.3	AAEL020884
LOC110675720	0	0	0	0	0	0	0	0	0	4.3	5.5	9.3	29.2	51.2	42.4	AAEL022409
LOC110675721	0.1	0.1	0.3	0.1	0.2	0.3	1.6	1.2	1.1	0	0	0.1	0.1	0.1	0.2	AAEL027085
LOC110675722	0	0	0	0	0	0	0	0	0	0	0.1	1	35.7	168.1	153.2	AAEL023616
LOC110675723	0	0	0	0	0	0	0	0	0.1	0	0.1	0.1	190.5	1362.3	837.8	AAEL028233
LOC110675724	0	0	0	0	0	0	0	0	0	0	0	0	94.3	483.6	416.9	AAEL024834
LOC110675725	0	0	0	0	0	0	0	0.2	0	0	0.2	0.2	40.5	253.4	211.3	AAEL027392
LOC110675726	0	0	0	0	0	0.3	0	0.1	0.2	0	0	0.4	57.1	252.9	260.2	AAEL025917
LOC110675727	0	0	0	0	0	0	0	0.1	0	0	0	0.6	93.1	415.9	392.6	AAEL020856
LOC110675728	0	0	0	0	0	0	0	0	0	0.1	0	0.2	85.6	451	404.1	AAEL027079
LOC110675729	3.8	2.6	2.7	1.2	2.2	1.9	0.4	0.6	0.4	0.2	0.2	0	0	0	0.1	AAEL021490
LOC110675730	9.4	6.3	9.9	8	6.4	6.5	5.7	6	7	1.7	1.8	1.8	5.2	4.4	3.4	AAEL021030
LOC110675731	0.3	0.3	0.7	0.8	1.1	1	1	1.1	0.6	0.3	0.3	0.4	1	0.7	0.7	AAEL025501
LOC110675732	0	0.1	0.2	0.1	0.2	0.2	5.2	5.5	5.4	0.1	0.1	0.1	0.1	0	0.2	AAEL028083
LOC110675733	3.1	3	2.7	7.7	6.9	3.4	4.4	6	4.5	0.2	0.6	0.1	15.7	62.9	20.4	AAEL024325
LOC110675734	0.2	0.5	0.4	0.6	0.5	0.6	0.6	0.4	0.8	0.1	0.3	0.1	0.2	0.3	0.3	AAEL027368
LOC110675735	14.1	12.6	14.4	11.1	12.4	16.6	5.3	5.9	6.6	0.9	1.4	1	4.2	4.2	5	AAEL023924
LOC110675736	0	0.1	0.4	0	0.2	0	1.2	1.2	1.4	0.9	1.5	2.4	4.3	13.6	11.3	AAEL026233
LOC110675737	0.5	0.2	0.4	0.1	0.1	0	0.1	0.1	0	0	0	0	0	0.2	0	AAEL022737
LOC110675738	0.4	0.2	0.3	0	0.1	0	0	0.3	0	0	0	0	0	0.1	0	AAEL023563
LOC110675739	8.3	6.5	10.9	17.1	7.8	9.6	8.5	9.5	7.4	1.1	1.5	0.6	0.3	0.4	1.4	AAEL027775
LOC110675740	43.9	61.6	46.6	25.9	36.3	24.2	47.3	56.1	49.7	2.8	3	4	18.6	16.9	20.7	AAEL027914				GO:0006897,GO:0016020	endocytosis,membrane
LOC110675741	0	0	0.1	0	0.1	0	0.1	0.5	0.7	1.1	1.6	4.2	9.4	35.5	17.5	AAEL023438
LOC110675742	1.8	0.3	1.2	2.9	4.8	1.5	4	6.6	5.5	1.1	3.4	2.2	4.6	4.2	4.1	AAEL025149
LOC110675743	0.1	0	0.4	0.2	0	0.8	0.2	0.1	0.7	0	0	0	0	0	0	AAEL020292
LOC110675744	0.6	0.7	0.5	0.5	0.2	0.3	0	0	0	0	0	0	0	0	0	AAEL022185
LOC110675745	1.1	0.4	0.7	0.6	0.8	0.8	2	1.1	1.4	0	0.1	0.1	0.1	0.2	0	AAEL021445
LOC110675746	0	0.1	0	0	0	0.1	0	0.1	0.1	0	0	0	0	0	0	AAEL023419
LOC110675747	0.3	0.5	0.4	0.5	1	0.9	0.7	0.6	0.3	0	0	0	0	0.1	0	AAEL026735
LOC110675748	0.7	1.8	0.7	1.5	1.7	1.2	1.1	1.6	1.1	0.4	0.3	0.2	0	0.1	0.2	AAEL025077
LOC110675749	0	0	0	0	0.1	0	0	0	0	0	0	0	0.5	0	0	AAEL021492
LOC110675750	0	0	0	0.8	0	0	0	0	0.2	0	0	0	0	0	0	AAEL025789
LOC110675751	0	0	0	0	0	0	0	0	0	0	0	0	0	0	0	AAEL022019
LOC110675752	0.4	3	1	1.2	2.6	2	2.6	4.1	3.7	0.1	0.3	0.1	0.2	0	0.5	AAEL024959
LOC110675753	1	0.7	0.5	0.1	0.5	0	0.3	0.7	0.4	0.5	0.1	0.2	0.1	0.7	0.4	AAEL020245
LOC110675754	5.3	4.2	4.7	2.6	0.9	1.5	0.2	0.4	0.3	0	0	0.1	0	0	0	AAEL021059
LOC110675755	0	0	0	0	0	0	0	0	0	0	0	0	0	0.1	0	AAEL026963
LOC110675756	0.1	0.1	0	0.3	0.3	0.4	0.4	0.6	0.4	0.1	0.1	0.1	0.1	0	0	AAEL020448
LOC110675757	23.7	15.2	14.8	15.1	0.7	4.8	4.7	5.2	3.1	0	0	0	0	0.1	0	AAEL025770
LOC110675758	0.1	0.2	0.2	0.1	0	0	0	0.1	0	0.1	0	0.1	0.2	0.3	0.3	AAEL028223
LOC110675759	0.9	0	0.8	2.9	4.9	2.7	4.2	3.8	3.7	0.3	0.4	0	0.5	0.9	0.7	AAEL023621
LOC110675760	0.8	1.7	1	0.6	0.6	0.6	1.1	1	1.1	0	0	0	0.1	0.1	0	AAEL024974
LOC110675761	0.8	1.8	1	0.6	0.6	0.6	1.2	1.2	1.3	0	0	0	0.1	0.1	0	AAEL020389
LOC110675762	0	0	0	0	0	0	0	0	0	0	0	0	0	0	0	AAEL026115
LOC110675763	0.3	0.2	0.2	0.6	0.2	0.7	0.3	0.4	0.3	0.1	0.1	0.1	0.3	0.2	0.1	AAEL021564
LOC110675764	0.1	0	0	0.1	0	0	0	0	0	0	0	0	0	0.1	0	AAEL026720
LOC110675765	1.7	1.5	0.8	0	0.4	0	0.3	0.4	0	3	2.1	1.3	3.4	2.8	2.7	AAEL022208
LOC110675766	9.3	10.3	13.5	8.9	4.7	7.8	29.5	36.4	30.2	3.3	4.6	2.6	6	4.5	5.6	AAEL027886
LOC110675767	0	0.8	2.1	0.9	0.3	0.4	1.8	0.4	0.3	0	0.3	0.3	0.6	0.9	0.3	AAEL023435
LOC110675768	0	0	0	0	0	0	0	0	0	0	0	0	0	0	0	AAEL024987
LOC110675769	0.2	0.5	0.3	0.3	0	0.1	0.2	0.3	0.2	0	0	0	0	0	0	AAEL020374
LOC110675770	0.2	0.5	0.3	0.3	0	0.1	0.2	0.3	0.2	0	0	0	0	0	0	AAEL022369
LOC110675771	0.2	0.6	0.3	0.4	0	0.1	0.2	0.4	0.2	0	0	0	0	0	0	AAEL026942
LOC110675772	0.2	0.6	0.3	0.4	0	0.1	0.2	0.4	0.2	0	0	0	0	0	0	AAEL021900
LOC110675773	0.3	0.1	0.6	2.1	7.5	3	5.8	4.7	6.4	0.4	0	0	0	0	0	AAEL026502
LOC110675774	0	0	0	0	0	0	0	0.6	0	0	0	0	0	0	0	AAEL020924
LOC110675775	0.1	0.1	0	0	0	0.1	0	0	0	0	0	0	0	0	0	AAEL025662
LOC110675776	0.1	0	0.1	0	0	0	0	0.1	0.1	0	0	0	0.1	0.1	0	AAEL027828				GO:0006508,GO:0008234	proteolysis,cysteine-type peptidase activity
LOC110675777	5.5	4.1	7.2	2.9	3.1	4	1.8	1.9	1.3	0.7	1.6	1.3	6.1	6.7	3.7	AAEL024363
LOC110675778	3.1	1.9	3.3	2.8	7.7	7.3	19.9	21.5	26.5	0.4	0	0.6	0	0.2	1.4	AAEL026965
LOC110675779	5.4	6.2	3.1	3.8	3.5	2.6	0.3	1.6	0.2	4.4	3.4	3.2	3.3	3.3	2.9	AAEL027941
LOC110675780	0	0	0.2	0	0.1	0	0.2	0	0	0	0	0	0	0.1	0	AAEL026041
LOC110675781	128.3	93.7	106.4	33.6	51.8	80	22.4	22.1	15	187	95.8	125.3	35.5	36.5	57.4	AAEL009968				GO:0000166,GO:0009166,GO:0016787,GO:0016788,GO:0046872	nucleotide binding,nucleotide catabolic process,hydrolase activity,hydrolase activity, acting on ester bonds,metal ion binding
LOC110675782	22	21.3	28.3	19.3	12.1	12.6	7.4	8.6	5.4	0.7	0.9	0.8	2.5	3.8	2.5	AAEL025123
LOC110675783	0.1	0.7	0.1	0.1	0.2	0	0.4	0.3	0.4	0	0	0.1	0.1	0.2	0.1	AAEL020515
LOC110675784	0.8	0.2	0.3	0.4	0.6	0.3	0.3	0.2	0.4	0	0	0.1	0.1	0	0	AAEL023196
LOC110675785	0	0	0	0	0	0	0	0	0	0	0	0	0	0	0	AAEL025139				GO:0004984,GO:0005549,GO:0007608,GO:0016020,GO:0016021	olfactory receptor activity,odorant binding,sensory perception of smell,membrane,integral component of membrane
LOC110675786	2.8	3.2	3.2	1.2	1.1	1.1	0.5	0.9	1	0	0.1	0	0.1	0	0	AAEL022250
LOC110675787	0	0	0	0	0	0	0	0	0	0	0	0	0	0	0	AAEL027944
LOC110675788	1	1.3	0.3	4.3	7.5	8.4	4.2	5.9	5	0.3	0.1	1	1.2	5.1	2.3	AAEL021396
LOC110675789	17.6	14.6	16.5	10.8	16.8	16.9	7.9	8.6	5.6	0.7	1.1	0.7	0.4	0.3	0.5	AAEL022385	pickpocket 201 [Source:VB Community Annotation]	ppk201		GO:0005272,GO:0006814,GO:0016020	sodium channel activity,sodium ion transport,membrane
LOC110675790	0.2	0.2	0.2	0	0.2	0	0.2	0.1	0.1	0.1	0.1	0	0	0	0.1	AAEL024010
LOC110675791	0.2	0.3	0.8	0.6	0.5	0.5	1	1	0.8	0	0	0	0.1	0.1	0	AAEL027599
LOC110675792	0.4	0	0.4	0.5	0.8	1.2	0.5	0.8	1	0	0	0.1	0	0.2	0	AAEL025303
LOC110675793	4.1	7.3	4.6	3.3	1.7	2.8	1	0.9	0.7	0	0	0.1	0	0.1	0.1	AAEL020677
LOC110675794	0.7	0.7	0.3	1	1.5	0.5	5.3	6.8	5.6	1.2	1	0.9	2.1	0.6	1.4	AAEL026681
LOC110675795	0	0	0	0.1	0	0	1.1	0.2	0.7	0.1	0	0	0.2	0.3	0.3	AAEL021651
LOC110675796	0.3	0.4	0.2	0.5	0.5	0.4	0.3	0.3	0.3	0	0	0	0.1	0.1	0.1	AAEL027584				GO:0003676,GO:0015074	nucleic acid binding,DNA integration
LOC110675797	4.3	3.8	4.9	2.8	3.2	3.4	3	3.4	3.6	0.4	0.5	0.9	1.7	1.3	1.8	AAEL023122
LOC110675798	3.6	3.5	3.1	0.7	1.9	1.8	1.9	2.1	2	0.1	0.2	0.1	0	0	0	AAEL020645
LOC110675799	3.4	3.1	3.1	0.7	2	1.5	1.8	2.1	2	0.1	0.2	0.1	0	0	0	AAEL024202
LOC110675800	3	3.8	3.4	3.8	4	2.4	7.7	6.4	7	0.9	0.8	0.7	2.2	1.2	1	AAEL022428
LOC110675801	0	0.1	0.1	0	0.3	0	0.7	0.4	0.5	0.1	0	0.4	0.1	0	0	AAEL028166
LOC110675802	0.6	2.6	2.5	8.2	9.8	6.3	31.4	32.6	33.4	2.5	2.2	2	2.6	2.5	2.6	AAEL023633
LOC110675803	8.7	6.6	6.7	4.6	8.5	8.7	2.8	2.5	2.4	24.5	23.5	18.8	7.5	7.7	7.8	AAEL023679				GO:0004842,GO:0005515,GO:0016567	ubiquitin-protein transferase activity,protein binding,protein ubiquitination
LOC110675804	1.9	3.2	2.1	1.2	0.5	0.6	2	1.2	1.6	0.1	0	0	0.5	0.2	0.1	AAEL028151
LOC110675805	0.8	0.5	0.7	0.6	0.8	0.8	2.1	2.7	1.2	0.1	0.1	0.3	0.2	0.3	0.3	AAEL022425
LOC110675806	14.5	12.6	16.4	22.3	18.5	18	9.4	9.6	7.9	1.3	1.3	1.1	1.1	0.5	1.7	AAEL026361				GO:0016788	hydrolase activity, acting on ester bonds
LOC110675807	0	0	0	0	0	0	0	0.2	0	0	0	0	0	0	0	AAEL022840				GO:0003677,GO:0005634,GO:0006915	DNA binding,nucleus,apoptotic process
LOC110675808	0	0	0	0	0	0	0.3	0	0.2	3.5	5.4	4.5	3	4.8	2.8	AAEL021139
LOC110675809	25.2	23.9	28.6	16.7	18.7	19.2	3.1	3.7	2.2	0.2	0.2	0.2	0.4	0.5	0.7	AAEL025808				GO:0005515,GO:0019005,GO:0031146	protein binding,SCF ubiquitin ligase complex,SCF-dependent proteasomal ubiquitin-dependent protein catabolic process
LOC110675810	26.3	32.8	34.9	31.9	52.1	46.2	62.1	60.8	64.8	18.7	17	23.4	38.6	29.1	34.8	AAEL009183	cytochrome oxidase biogenesis protein (oxa1 mitochondrial) [Source:VB Community Annotation]
LOC110675811	27.1	27.7	22.5	26.8	24.6	21.4	13.7	14	16.4	8.7	8.3	6.8	6.4	5.8	4.4	AAEL023587				GO:0004252,GO:0006508	serine-type endopeptidase activity,proteolysis
LOC110675812	0.3	1	1.8	1.2	2.4	1.7	8.2	14.1	13.3	0.7	0.2	0.1	1.2	0.7	2.2	AAEL020088
LOC110675813	7.4	7.4	7.5	1.3	2.4	2.7	2.8	2	2.8	0.7	0.6	0.3	0.7	0.5	1	AAEL025890
LOC110675814	2.6	7	5.5	5	2.4	2.2	8.5	6.6	6.8	0.2	0.6	0.3	2.2	0.9	1.9	AAEL021207
LOC110675815	0	0	0	0	0	0	0	0	0	0	0	0	0.1	0	0	AAEL027136
LOC110675816	11.2	10	12.1	8.1	7.9	7.5	2.4	2.8	1.6	0.3	0.5	0.6	0.5	0.7	0.6	AAEL022509				GO:0005515	protein binding
LOC110675817	0	0.2	0	0.1	0.3	0.1	0.2	0.2	0.3	0	0	0	0	0	0	AAEL027221
LOC110675818	0.1	0.1	0.1	0	0	0	0	0	0	0	0	0	0	0	0	AAEL023642
LOC110675819	0	0	0	0.2	0.2	0	0	0.5	0.4	0	0	0	0	0	0	AAEL020166
LOC110675820	0.4	0.2	0.4	0.4	0.2	0.2	0	0.2	0	7.5	9.7	9.6	18.3	24	17	AAEL024921				GO:0016020,GO:0016021,GO:0016192	membrane,integral component of membrane,vesicle-mediated transport
LOC110675821	4.8	4.7	5	2.4	4.5	3.1	3.2	3.7	3.3	4.2	5	3.9	3.9	2.9	2.8	AAEL020942				GO:0005524	ATP binding
LOC110675822	49.3	35	41.8	18.5	11.9	23.8	3.3	2.2	2.8	0.2	0.2	0.2	0.2	0	0.4	AAEL025795
LOC110675823	0.6	0.3	0	0	0.4	0.3	0	0	0.1	0	0	0	0.2	0	0	AAEL026009
LOC110675824	4.1	2.9	5.1	4.3	2.8	2	4.1	4	3.6	2.7	4.5	1.8	1.4	1.7	1.4	AAEL021324
LOC110675825	0.2	0.1	0.1	0	0	0.1	0.4	0.3	0.4	0	0	0	0.1	0	0	AAEL026910
LOC110675826	0	0	0	0	0	0	0	0	0	0	0	0	0	0	0	AAEL022266				GO:0004497,GO:0005506,GO:0016020,GO:0016021,GO:0016705,GO:0020037,GO:0046872,GO:0055114	monooxygenase activity,iron ion binding,membrane,integral component of membrane,oxidoreductase activity, acting on paired donors, with incorporation or reduction of molecular oxygen,heme binding,metal ion binding,oxidation-reduction process
LOC110675827	0.7	0.5	0.6	0.1	0.2	0.7	0.4	0.7	0.5	1	0.6	0.8	0.3	0.5	0.9	AAEL024942
LOC110675828	0.7	0.3	0.8	0.9	0.9	1.2	1.2	1.2	1.9	0	0	0	0.4	0.2	0.2	AAEL020218
LOC110675829	1.1	1	1.2	1.3	2.7	2.6	2.4	2.6	1.7	0	0.1	0	0.2	0.3	0.4	AAEL025798
LOC110675830	0.5	0.6	0.7	0.5	0.6	0.3	0.7	0.5	1	0.2	0.1	0.1	0.1	0	0.1	AAEL022418
LOC110675831	1.7	1.6	1.9	0	0.5	0.1	1.9	2	1.9	0.9	0.4	0.6	0.9	0.3	0.5	AAEL027271
LOC110675832	0.1	0.5	0.3	0	0.1	0.1	0.2	0.1	0.3	0	0	0	0	0	0	AAEL023674
LOC110675833	31.8	24	32.3	30.9	30	28.9	36.3	41.9	36.5	11.8	12.1	13	47.9	45.1	46.5	AAEL024786				GO:0005789,GO:0016020,GO:0016021,GO:0030054,GO:0033149,GO:0070972	endoplasmic reticulum membrane,membrane,integral component of membrane,cell junction,FFAT motif binding,protein localization to endoplasmic reticulum
LOC110675834	1	1.4	1.5	1.6	2.2	0.9	1.4	1.1	1.8	0.3	1.2	0.1	2.8	1.5	1.7	AAEL020052
LOC110675835	0	0	0	0	0	0	0	0	0	0	0	0	0	0	0	AAEL025925
LOC110675836	25	28.1	35.1	10.3	7.6	7.1	11.9	15.9	11.1	1.5	1.7	1.6	4.4	4.1	7.2	AAEL021196
LOC110675837	25.6	28.9	27.4	21.9	23.2	23	19.9	22.5	18.7	8.3	6.6	9.5	12.3	11.8	14.5	AAEL022560
LOC110675838	0	0	0	0	0	0	0.1	0	0.1	0	0	0	0	0	0	AAEL028172
LOC110675839	59.6	50.8	60	39.5	30.9	37.2	50.7	55.8	49	12.5	12.4	12.8	52.7	51.3	51	AAEL024800				GO:0005789,GO:0016020,GO:0016021,GO:0030054,GO:0033149,GO:0070972	endoplasmic reticulum membrane,membrane,integral component of membrane,cell junction,FFAT motif binding,protein localization to endoplasmic reticulum
LOC110675840	1.3	1.5	1.2	1.3	1	0.6	1.4	1.3	1.5	0.1	0.2	0.1	0.7	0.3	0.3	AAEL026451
LOC110675841	0	0.5	0	0.4	0.3	0	0.4	0.2	0	0	0	0	0.3	0	0.1	AAEL023994
LOC110675842	0	0	0	0	0	0	0.1	0.1	0	0	0	0	0	0	0	AAEL027641
LOC110675843	0	0.2	0.3	0.8	0.3	0.2	1.8	1.7	1.7	0.1	0.2	0.7	0.9	0.6	1.4	AAEL028183
LOC110675845	0	0	0	0	0.4	0.2	0	0	0	0	0	0	0	0	0	AAEL025218
LOC110675846	0	0.2	0	0.3	0	0	0	0	0	0	0.1	0	0	0	0	AAEL020733
LOC110675847	0.1	0.5	0.6	0.3	0.9	0.3	1	1.1	1.3	0	0	0	0.1	0	0.1	AAEL026316
LOC110675848	0.5	0.5	0.6	0.7	0.9	0.3	1.2	1.3	1.6	0.1	0.1	0	0.2	0.1	0	AAEL026049
LOC110675849	0.5	0.5	0.6	0.7	0.9	0.3	1.2	1.3	1.6	0.1	0.1	0	0.2	0.1	0	AAEL027528
LOC110675850	0.3	0.2	0.1	0.1	0	0	0.6	0.3	0.3	0	0	0	0	0	0	AAEL025739
LOC110675851	7.5	4.1	4.4	1.4	4	3.3	1.8	2.3	2.1	0.1	0.6	0	0.3	0.7	0.4	AAEL020223
LOC110675852	0	0.1	0	0.3	0	0	0.4	0.1	0.1	0	0	0	0.1	0.1	0.1	AAEL024865
LOC110675853	0	0.4	0	0	0	0	0.6	0	1	0	0	0.3	0	0	0	AAEL022294
LOC110675854	0.7	0.3	0.1	1.3	0.5	0.7	0.4	0.5	1.2	0.1	0.1	0	0.1	0	0	AAEL026863
LOC110675855	0	0	0	0	0	0.5	2.5	2	2.3	0.1	0.2	0.5	2.9	1.5	0.7	AAEL021354
LOC110675856	0	0.2	0	0	0	0	0.3	0.1	0.2	0	0	0.1	0	0	0	AAEL025950
LOC110675857	0	0.2	0	0	0	0	0.3	0.1	0.2	0.1	0	0.1	0	0	0	AAEL024651
LOC110675859	0	0	0	0	0	0	0	0	0	0	0	0	0	0	0	AAEL023791
LOC110675860	0	0	0	0	0	0	0	0.1	0	0	0.1	0	0.1	0	0	AAEL022965
LOC110675862	0	0.1	0.1	0.2	0.1	0	0.9	0.6	0.9	0.1	0	0.1	0.1	0.1	0.2	AAEL025846
LOC110675863	0	0.1	0.1	0.2	0.1	0.1	0.9	0.6	0.8	0.1	0	0.1	0.1	0	0	AAEL027787
LOC110675864	1.9	1.6	2.6	3.1	2.4	2.3	1.6	1.6	1.5	0.1	0.4	0.2	0.1	0	0.1	AAEL020278
LOC110675865	10.6	9.4	9.7	15.7	12.3	11	5.8	5.5	4.9	0.9	1	0.6	0.5	0.3	0.9	AAEL027649
LOC110675866	1.2	0.3	0.8	3.9	22.2	21.6	1.6	2	1.5	0.1	0.1	0	0.2	0.2	0.3	AAEL023302
LOC110675867	0.3	0.6	0.1	0.4	0.5	1	0.4	0.5	0.4	0.2	0	0	0.1	0.3	0.1	AAEL023042
LOC110675868	0.1	0.1	0.1	0.7	0.6	0.3	0.8	0.5	0.4	0	0.1	0	0	0	0	AAEL027535
LOC110675869	0.7	0.9	0.6	0.1	0.2	0.2	0.8	0.6	0.6	0	0	0	0	0	0	AAEL025919
LOC110675870	0.2	0.4	0.3	1.1	1.5	0.4	0.8	1.6	0.8	0.3	0.6	0.5	0.7	0.7	1	AAEL024030
LOC110675871	0.1	0.1	0.1	0	0.1	0.1	0.2	0.2	0.2	0	0.1	0.2	0.1	0.1	0.2	AAEL026604
LOC110675872	0	0.3	0	0.4	0.2	0	1.1	0.8	1.1	0	0.1	0.2	0	0	0	AAEL023133
LOC110675873	1.2	0.7	0.8	0	0.3	0.1	2.5	2	2.3	0.4	0.1	0.2	0.2	0.1	0.1	AAEL025278
LOC110675874	0.7	1	0.6	1.3	1.4	1.3	1.6	2.6	2.2	0.1	0	0	0.1	0	0.2	AAEL021673
LOC110675875	0	0.2	0	0.1	0.1	0.1	0.4	0.3	0.2	0	0	0	0.1	0	0	AAEL027997
LOC110675876	0.7	0.9	1	1.3	0.8	2.5	2.5	3.2	4.7	1.9	1.5	3.6	2.2	3.3	2.3	AAEL020740
LOC110675877	0	0	0	0	0	0.1	0.1	0	0	0	0	0	0.1	0	0	AAEL027607
LOC110675878	1.8	0.6	0.8	0.8	1.2	0.6	2.9	2.8	2.4	0.1	0.1	0	0.1	0.2	0.2	AAEL020220
LOC110675879	0	0	0.2	0	0	0	0.4	0.2	0.3	1.5	2.6	5.7	206	625.2	134.2	AAEL026679
LOC110675880	1.8	2.4	2	0.6	0.6	1.3	0.3	0.1	0.3	0	0	0.2	0.4	0.2	0.1	AAEL028114
LOC110675881	2.2	3.2	2.2	0.7	0.7	1.5	0.3	0.2	0.2	0	0	0.2	0.4	0.2	0.2	AAEL024727
LOC110675882	0	0	0	0	0	0.1	0	0	0	0	0	0	0.1	0.1	0.1	AAEL027442
LOC110675883	0	0	0	0	0	0	0	0	0	0	0.1	0.1	0.2	0.1	0.2	AAEL025236
LOC110675884	1.4	1.3	2	1.3	0.9	1.4	1.7	2.3	2.2	0.5	0.3	0.6	0.8	1.2	0.4	AAEL021686
LOC110675885	0	0	0	0	0	0	0	0.1	0.1	0	0	0	0	0	0	AAEL026591
LOC110675886	0	0	0	0	0	0	0	0	0	0	0	0	0	0	0	AAEL023163
LOC110675887	0	0	0	0	0	0	0	0	0	0	0	0	0	0	0	AAEL020798
LOC110675888	2.8	2.3	2.3	0	0.2	0.2	0	0	0	0	0	0	0	0	0	AAEL023645
LOC110675889	0.6	0	0	0	0.8	0.3	1.4	0.5	0.9	0.6	0	0.7	0.1	0.2	0	AAEL020207
LOC110675890	1.2	1.4	2.7	0.3	0.2	1.3	1.5	2.4	1.7	0.3	0.2	0.5	0.3	0.5	0.6	AAEL025004				GO:0000154,GO:0000179,GO:0008649	rRNA modification,rRNA (adenine-N6,N6-)-dimethyltransferase activity,rRNA methyltransferase activity
LOC110675891	0	0.5	0	0.2	0	0	0.2	0	0.5	1.3	1.9	2.2	1.6	0.9	0.8	AAEL026678
LOC110675892	0.2	0.3	0.1	0.7	0.4	0.4	0	0	0.2	0	0	0	0	0	0.3	AAEL024188
LOC110675893	0.3	0	0.2	0.2	0.1	0.2	0.4	0.5	0.5	0	0	0	0.4	0	0	AAEL021296
LOC110675894	0	0	0	0	0	0	0.2	0.2	0.8	0	0	0	0	0	0	AAEL022829
LOC110675895	1.2	1.5	1.1	0.7	0.7	0	0.7	0.5	0.3	0	0	0	0	0	0	AAEL020138
LOC110675896	0.3	0	0.2	0.2	0.1	0.2	0.3	0.5	0.5	0	0	0	0.3	0	0	AAEL026122
LOC110675897	77.2	81.1	90.3	48.7	58.1	51.9	62.4	66.8	62.4	5.6	5.1	5.3	7	6.6	9.3	AAEL028180				GO:0005634,GO:0008270	nucleus,zinc ion binding
LOC110675899	0	0	0	0	0	0.2	0.1	0	0	0	0	0	0	0	0	AAEL027084
LOC110675900	47.2	48.2	61.9	34.9	28.4	24.3	3.7	5.2	3	0	0	0	0	0	0	AAEL021856
LOC110675901	0	0	0.1	0.3	0.2	0.5	0.9	0.2	0.8	0.1	0	0	0.1	0	0.1	AAEL024688
LOC110675902	0	0.1	0.2	0.5	0.2	0.5	1.3	0.3	1.2	0.1	0	0	0.2	0	0.1	AAEL020357
LOC110675903	1.8	1.2	2.3	2.3	1.2	2	9.3	5.6	10	1.6	2.9	1	1.1	2.4	2.3	AAEL024972
LOC110675904	0	0	0	0	0	0	0	0	0	0	0	0	0	0	0	AAEL023744
LOC110675905	0.1	0.7	0.3	0.7	0.5	0.3	1.4	1.5	0.9	0	0	0	0	0.2	0.3	AAEL026427
LOC110675906	0	0.2	0	0.1	0.3	0.1	0.2	0.4	0.2	0.1	0.2	0.1	0.1	0.1	0.2	AAEL025661
LOC110675907	0	0	0	0	0	0	0	0	0	0	0	0	0	0	0	AAEL022023
LOC110675908	0.6	0.1	0.5	0.3	0.8	0.2	1.3	0.8	0.9	0.7	1.5	0.4	1.1	0.8	1.2	AAEL024546
LOC110675909	0	0	0.2	0	0	0.3	0.4	0.8	0.6	0	0	0	0	0	0	AAEL020991
LOC110675910	29.3	103.3	24	4.5	9	15	10.1	14.3	9.4	0.2	0.2	0.2	0	0.1	0.1	AAEL020465
LOC110675911	0.2	0.1	0	0	0.2	0	0	0.1	0.2	0	0	0	0	0	0	AAEL024978
LOC110675912	0	0.2	0.6	0.4	0.3	0.2	0.6	0.7	0.6	51	61.9	49.6	23.2	19.4	26.8	AAEL022575
LOC110675913	0	0	0	0	0.1	0	0.1	0	0	0	0.1	0	0	0	0	AAEL027197
LOC110675914	28.7	30.4	26.4	17.5	17.3	14.4	11.5	12.6	11.3	4.4	4.4	5.7	5	4.1	5.1	AAEL025265
LOC110675915	0.4	0.2	0.1	0.1	0.5	0.3	0	0	0.2	1.6	1.4	1.4	0.8	0.7	0.6	AAEL021621				GO:0046872,GO:0046983	metal ion binding,protein dimerization activity
LOC110675916	1.4	2.4	1.9	0.8	0.3	0.2	2.2	2.8	1.8	0.5	0.5	0.4	1.1	0.6	1.4	AAEL026012
LOC110675917	1.4	2.5	1.9	0.9	0.3	0.2	2.2	2.9	1.9	0.5	0.4	0.4	1.1	0.6	1.4	AAEL020705
LOC110675918	29.3	29.8	27.9	11.8	14.3	12.6	17.6	17.6	16.1	4.1	4.1	3.3	2.1	1.9	1.7	AAEL025164
LOC110675919	81.1	73	77.4	54.9	60.3	59.3	58.4	52.4	54.8	11.1	14.2	10.2	39.2	32.7	27.2	AAEL023494				GO:0003735,GO:0005763,GO:0005840,GO:0006412	structural constituent of ribosome,mitochondrial small ribosomal subunit,ribosome,translation
LOC110675920	0.3	1.2	0.9	0.3	0.4	0.2	0.5	0.5	0.3	0	0	0	0	0	0.2	AAEL027224
LOC110675921	2.3	1.1	1.3	10	0.5	0.5	1.1	1.3	1.6	0	0	0.1	0.1	0.1	0	AAEL023803
LOC110675922	0.3	0.1	0.1	0.3	0.2	0.2	0.4	0.6	1	0.1	0.1	0.2	0	0.1	0.4	AAEL025685
LOC110675923	0.5	1	1	0.3	0.4	0.5	0.8	1.1	1	0	0.1	0.1	0.2	0.1	0.2	AAEL021908
LOC110675924	0.5	1	1	0.3	0.4	0.5	0.8	1.1	1	0	0.1	0.1	0.2	0.1	0.2	AAEL026525
LOC110675925	2.4	1	0.7	2.2	0.9	0.6	0.9	2	2.2	0	0	0	0	0.1	0.2	AAEL022875
LOC110675926	0.2	0.2	0.2	0.3	0.4	0	0.2	0.2	0.4	7.2	5.8	5.8	4	4.6	4.5	AAEL023923
LOC110675927	0	0.2	0.1	0.1	0.1	0.1	0.5	0.6	0.2	0.1	0.1	0.1	0.8	0.8	0.8	AAEL026238
LOC110675928	0	0	0	0	0	0	0	0	0	0	0	0	0	0	0	AAEL024557
LOC110675929	20.7	24.2	27.8	20.7	5.9	16.9	2.2	2	1.2	0.1	0	0.4	0	0.1	0	AAEL021011
LOC110675930	21	10	15.1	1.3	10	15.3	0.9	1.6	0.7	0	0	0.1	0	0.1	0	AAEL024818				GO:0005515	protein binding
LOC110675931	0	0	0	0	0.1	0	0.1	0	0.2	0	0	0	0	0.1	0	AAEL022002
LOC110675933	3.3	1.8	5	11	12.7	12.1	14.3	15.1	15.6	1.7	3.2	4.3	5.7	5.2	12.1	AAEL023669
LOC110675934	0	0	0	0	0	0	0	0.1	0	0	0	0	0.3	0.5	0.1	AAEL027015
LOC110675935	0	0	0	0	0.1	0	0.1	0.1	0.1	0.1	0.1	0.1	0.5	0.7	0.3	AAEL022501
LOC110675936	0.9	1.4	0.2	0.1	0.1	0.5	0.3	0.1	0.4	0.3	0.2	0	0.1	0.1	0	AAEL022279
LOC110675937	3.2	5.1	1.6	2.9	1	1.2	4.2	1.4	1.1	0	0	0	0	0	0.2	AAEL027537
LOC110675938	4	1.7	3.1	8.2	7.8	5	13.9	10.9	14.5	0.2	0.4	0	1.4	0.8	2.1	AAEL023172
LOC110675939	0	0	0	0	0	0	0.3	0.3	0.2	0	0	0	0	0	0	AAEL026595
LOC110675940	0	0	0	0	0	0	0	0	0.2	1.4	1.9	1.8	0.2	1.3	0.3	AAEL023225
LOC110675941	0	0	0	0	0	0	0.1	0	0	5.6	5.5	5.6	2.8	3	2.7	AAEL018004
LOC110675942	0	0	0	0	0	0	0	0	0	3	2.5	1.7	1	1.3	1.7	AAEL020509
LOC110675943	0.2	0	0.3	0.5	0.2	0	0.2	0.8	0.2	0.1	0.6	0	0	0.1	0	AAEL027770
LOC110675944	0	0	0	0	0	0	0	0.3	0.2	0	0	0	0.1	0	0	AAEL021372
LOC110675945	0	0	0	0	0	0	0	0.2	0	0	0	0	0	0	0	AAEL025094				GO:0005549	odorant binding
LOC110675946	8.7	14.6	15.9	14	4.2	9.5	1.2	1.5	1.2	0.2	0.2	0.2	0	0	0	AAEL023262				GO:0005549	odorant binding
LOC110675947	0.6	0.2	0.2	0.1	0.7	0.6	0	0.1	0.2	0	0	0	0.2	0	0	AAEL026832
LOC110675948	0	0	0	0	0	0	0	0	0	0	0	0	0	0	0	AAEL020529
LOC110675949	0	0	0	0.1	0.2	0	0.4	0.7	0.1	0.1	0.1	0.1	0	0	0	AAEL027799
LOC110675950	0	0	0	0	0	0	0.6	0.4	0.2	0	0	0.1	0	0	0	AAEL020510
LOC110675951	0.3	0.2	0.3	0.1	0.1	0.2	0.2	0.1	0.2	0	0	0.1	0	0.1	0.1	AAEL028184
LOC110675952	0.1	0.1	0	0.3	0.1	0.2	0.3	0.3	0.3	0.2	0.1	0.1	0.1	0.2	0	AAEL027004
LOC110675953	0.6	0.8	0.8	1.1	1.4	0.7	1.4	1.5	1.3	0.1	0.5	0	0.9	0.5	0.1	AAEL022635
LOC110675954	0.5	0.6	0.4	0.8	0.7	0.6	0.6	0.6	0.3	0.2	0	0	0.1	0.1	0.1	AAEL027282
LOC110675955	43.1	38.9	48	49.1	55	54.5	74.2	73.7	75.3	11.9	10.8	13.5	43	37.1	39.4	AAEL023530				GO:0005515	protein binding
LOC110675956	4.6	4.3	4.8	6.1	8.2	3.8	19.6	14.9	19.3	0.2	0.2	0.1	8	6.1	6.8	AAEL024728
LOC110675957	48.5	48.9	52.5	36.6	30.1	32	41.4	48.9	41.3	13.8	11.7	12.8	10.6	11.2	13.4	AAEL020110				GO:0000122	negative regulation of transcription by RNA polymerase II
LOC110675958	0	0.2	0.2	0	0.2	0	0	0.2	0.3	0	0.4	0.2	0.7	0.2	0	AAEL026059
LOC110675959	0	0.3	0	0	0	0	2.1	2.6	3.1	0	0	0	0.5	0	0	AAEL021089
LOC110675960	0.1	0	0	0	0	0.1	0	0	0	0	0	0	0	0	0	AAEL028075
LOC110675961	0	0.8	1.2	3.6	3.9	3.7	6.4	7	3.8	1.7	0.5	1.4	0.9	0.4	0.4	AAEL023465
LOC110675962	0.4	0.8	0.6	0	0	0	0	0	0.3	0.1	0.1	0	0	0	0	AAEL021991
LOC110675963	0.6	0.7	0.4	0.9	0.8	0.7	0.7	0.7	0.3	0.2	0	0	0.1	0.1	0.1	AAEL025510
LOC110675964	0	0.2	0.3	0.1	0.3	0	0	0.4	0.5	0.2	0	0.1	0	0	0.2	AAEL021025
LOC110675965	0	0	0	0	0	0	0	0	0	0.1	0	0.1	0	0	0	AAEL024581
LOC110675966	0.2	0.2	1.4	0.5	1.4	0.9	0.6	1.4	0.8	3.4	2.6	3.1	3.9	2.1	1.7	AAEL026341
LOC110675967	0.9	0.6	1.5	0.7	7.9	9.4	0.3	0.8	0.7	0	0	0	0	0	0	AAEL023938
LOC110675968	1	1.3	1.3	0.8	3.2	3.8	0.7	0.4	1.2	1.1	1.3	1.1	0.6	1	0.4	AAEL025272
LOC110675969	0.2	0	0.3	0.3	0.1	0.1	0.1	0	0.1	0.3	0.1	0.2	0.2	0.4	0.1	AAEL023058
LOC110675970	0	0.2	0.3	1.1	0.1	0.3	0.4	0.3	0.4	0.2	0.3	0.1	0.3	0.3	0.4	AAEL025269
LOC110675971	0.2	0	0	0.4	0	0.3	0.7	0.5	0.5	0.1	0.1	0	0.1	0	0.1	AAEL021642
LOC110675972	0.6	0.9	0.7	0.8	1.8	0.7	2.2	2.4	1.7	0	0	0	0	0	0.1	AAEL024401
LOC110675973	1.8	3.6	1.9	0	2.5	1.6	0.5	0.3	0.2	0	0	0	0	0	0	AAEL020699
LOC110675974	0.8	0.5	1.1	0.3	0.7	0.9	0.2	0.5	0.6	0.1	0.1	0.1	0.1	0.2	0.4	AAEL024998
LOC110675975	8	6.8	8.7	4.8	3.3	4	1.4	1.4	1.1	0.1	0.2	0.1	0.1	0.3	0.2	AAEL023658
LOC110675976	0.5	0.2	0.2	0.2	0.7	0.4	0.6	0.7	0.1	0.9	1.5	1.3	0.6	1	1.5	AAEL028159
LOC110675977	50.1	42	47.5	35.7	22	36.5	6	7.2	4.3	0.1	0	0.2	0.3	0.4	0.4	AAEL023581				GO:0006486,GO:0016020	protein glycosylation,membrane
LOC110675978	0	0	0.4	0.2	0	0.4	0.1	0.2	0.3	14.4	18.1	21.4	15	31.7	5	AAEL028189
LOC110675979	0.4	0	0.4	0.2	0.9	0.2	0.3	0.4	0.7	0	0.1	0	0.2	0.1	0.2	AAEL022534
LOC110675980	0.2	0.5	0.4	0.5	0.3	0.2	0.6	0.4	0.7	0	0	0.4	0	0.1	0	AAEL025191
LOC110675981	6.4	5.6	6.5	7.3	0.9	3	0.7	0.5	0.6	0	0.3	0.2	1	1.2	0.2	AAEL020437
LOC110675982	0.1	0.6	0.1	0.3	0.2	0.2	0	0.1	0.2	0	0	0.1	0.2	0.2	0.1	AAEL027814
LOC110675983	12.6	15.3	13	6.6	10.6	6.4	9.6	9.8	8	47.4	42.5	39.3	36	32.3	33.4	AAEL024191				GO:0047617	acyl-CoA hydrolase activity
LOC110675984	0	0.2	0.3	3.7	5.1	5.2	13.2	11.1	10.4	1.6	0.5	4.6	3.3	2.6	2.7	AAEL026909
LOC110675985	0	0.1	0.1	0.1	0.1	0.1	0.4	0.5	0.5	0.2	0.2	0.4	0.1	0.2	0.2	AAEL022265
LOC110675986	2	2.6	3.5	7.6	7	3.3	8.8	6.2	8.7	1.1	1.6	0.3	1.8	0.5	1.4	AAEL020306
LOC110675987	0	0	0	0	0	0.1	0	0	0	0	0	0.2	0	0	0	AAEL025886
LOC110675988	0	0	0	0	0	0	0	0	0	0	0	0	0.2	0	0	AAEL023860
LOC110675989	122	116.8	123.7	309.9	314.9	293.2	137	119.6	141.8	185.3	197.8	214.9	134.8	133.7	136.5	AAEL025110
LOC110675990	0.3	0	0	0	0	0.2	0	0.2	0	322.5	273.6	294.9	459	582.7	423.7	AAEL020833
LOC110675991	1.3	0.2	1.2	1.6	3.9	1.1	4.3	3.6	5	8.5	11.5	7.7	27.6	26.2	17.7	AAEL025683
LOC110675992	0	0	0	0	0.2	0	0	0.3	0	1.2	0.2	0.6	0.3	0.3	0	AAEL027389
LOC110675993	2.4	2.9	4.8	4.9	7.2	4.2	10.3	12.4	9.7	8.1	8.8	10.2	5.5	6.4	7.5	AAEL024527
LOC110675994	3.2	3.2	3.2	5.4	6.1	4.1	3.7	3.7	2	7.4	11.8	6.2	5.5	6.8	8.2	AAEL026201
LOC110675995	0.4	0	0	0.2	0	0	1	1	1.3	1.3	1.6	0.8	0.3	1.1	2.1	AAEL022815
LOC110675996	0	0.1	0.1	1.6	1.7	0.5	1	1.8	1.9	0.1	0	0	0.2	0	0.4	AAEL025486
LOC110675997	0	0	0	0	0	0.2	0	0	0	0	0	0	0	0	0	AAEL021949
LOC110675998	0.7	1.2	0.6	0.3	0.7	1	1.5	0.9	1.4	0.1	0	0	0	0.1	0	AAEL024644
LOC110675999	0.7	0.5	0.5	0.3	0.9	1	0.7	0.8	0.6	0	0	0	0	0	0	AAEL020937
LOC110676000	0	0	0	0	0	0	1.5	3.2	1.5	1.4	0.4	1	0.5	0.3	0.6	AAEL027981
LOC110676001	0.3	0.3	0.4	0.1	0.2	0	0.1	0.2	0.8	0.1	0	0	0.1	0.1	0	AAEL020729
LOC110676002	0.7	0.9	0.6	1.8	0.9	0.8	3	2.9	2.8	0	0.1	0	0.1	0.2	0.1	AAEL024318
LOC110676003	1.6	1.1	1.4	0.2	0.2	0.3	0.8	0.5	0.6	0.1	0	0.1	0	0.2	0.1	AAEL021500
LOC110676004	3.2	1.6	1.6	0.5	1.9	0.4	1	1.2	1.5	0	0.1	0.1	0.1	0.2	0	AAEL026182
LOC110676005	0.1	0.2	0.1	0.7	0.8	0.8	0.5	0.6	0.8	0.8	0.4	0.5	0.3	0.1	0.1	AAEL022141
LOC110676006	1.8	3.3	1.8	1.2	0.5	0.6	1.7	0.9	1.8	0.1	0	0.1	0.5	0.2	0.1	AAEL026621
LOC110676007	0.2	0.2	0.3	0.5	0.5	0.1	0.9	1.1	0.8	0.4	0.2	0.3	0.5	0.4	0.4	AAEL024042
LOC110676008	0.6	0.6	2.1	5.5	5.3	5.6	10.3	9.7	9.6	0.1	0.3	0.2	0.3	0.2	0.5	AAEL027488
LOC110676009	20.4	23.2	22.2	5.3	1.1	3	3.3	3.9	2.6	0.1	0.1	0	0.1	0.4	0.1	AAEL020751
LOC110676010	0.1	0.4	0.1	0	0.2	0	0.3	0.3	0.1	0.2	0.7	0.8	1.1	1.8	0.9	AAEL023992
LOC110676011	0	0	0.1	0.3	0.2	0	0.3	0.4	0.3	1.4	1.2	1	1.6	1.4	0.9	AAEL025862
LOC110676012	0	0	0	0	0	0	0.1	0.1	0.1	0	0	0.1	0	0	0	AAEL020251
LOC110676013	7	9.1	12.4	6	7.2	5.2	7.9	8.2	7.3	1	1	0.4	1	1.1	0.9	AAEL026776
LOC110676014	2.6	6.9	4.1	2.2	1.8	1.5	3.5	4.1	4.9	0.5	0.3	0.3	0.9	1.2	1.1	AAEL025235
LOC110676015	5.2	5.4	3.9	0.4	2.9	1.5	0.4	1.2	0.6	0.1	0.2	0.3	0.1	0.1	0.1	AAEL028063
LOC110676016	0.2	0.1	0.3	0.1	0.2	0	0.1	0	0	0	0	0	0	0	0	AAEL022545
LOC110676017	0.4	0	0.1	0	0.1	0	0	0	0.1	0	0.1	0.2	0.3	0.2	0.2	AAEL024044				GO:0042302	structural constituent of cuticle
LOC110676018	51.6	32.4	47.5	27.4	47.7	51.1	38.9	44.9	41.5	42.8	40.9	33.1	49.3	55	47.7	AAEL026606
LOC110676019	29.5	23.3	32.8	13.4	10.4	13.9	4.5	3.8	2.2	7.7	7.3	5.7	4.6	6	4	AAEL020167
LOC110676020	28.4	27.4	28.2	22.4	17.6	17.9	20.2	19.8	17.9	2.4	2.9	2.5	3.6	3.5	4.1	AAEL023574				GO:0005634,GO:0008270	nucleus,zinc ion binding
LOC110676021	12.7	20.1	17.9	4.3	1	4.8	3.3	1.8	2.8	0.7	0	0.2	0	0.2	0.2	AAEL020232
LOC110676022	0.4	0.4	0.4	0.1	0.3	0.2	0.8	1.1	0.8	0.1	0.1	0.1	0.4	0.3	0.4	AAEL025848
LOC110676023	0.4	0.5	0.6	0	0.1	0.2	0.8	1.1	1.2	0.1	0	0.2	0.6	0.3	0.3	AAEL027685
LOC110676024	1.3	0.5	0.9	0.4	0.6	0.4	3.1	4.3	3.8	0.1	0.1	0.3	0.3	0.7	0.6	AAEL024713
LOC110676025	0	0	0	0	0	0	0	0	0	0.2	0.1	0	0.5	0.5	0.4	AAEL028149
LOC110676026	0.2	0	0.1	0	0.1	0.1	0.1	0.2	0.2	0.3	0.3	0.5	0.9	2	1.1	AAEL023651				GO:0005262,GO:0098703	calcium channel activity,calcium ion import across plasma membrane
LOC110676027	0	0	0	0	0	0	0	0.1	0	0	0	0	0.1	0	0	AAEL027021
LOC110676028	0	0	0	0	0	0	0.1	0	0.1	0	0	0	0	0	0	AAEL022516
LOC110676029	5.1	4	7.9	3.3	3.9	2.9	1.1	1.7	1.7	2.7	1.2	1.6	0	2.9	1.3	AAEL024743
LOC110676030	76.1	81.2	82	55.2	51.4	47.1	121.1	116.4	120.4	13.8	14.6	15.5	48.5	46.1	56.7	AAEL024500				GO:0000139,GO:0005198,GO:0005515,GO:0005737,GO:0005794,GO:0006890,GO:0015031,GO:0016020,GO:0016192,GO:0031410	Golgi membrane,structural molecule activity,protein binding,cytoplasm,Golgi apparatus,retrograde vesicle-mediated transport, Golgi to endoplasmic reticulum,protein transport,membrane,vesicle-mediated transport,cytoplasmic vesicle
LOC110676031	0	0	0	0	0.3	0	1.2	1.7	1	1.2	1.3	1.1	1.6	2.4	1	AAEL009873				GO:0003723,GO:0005737,GO:0030430	RNA binding,cytoplasm,host cell cytoplasm
LOC110676032	0.7	1	0.4	0.5	0.7	0.6	1.5	1.4	2.2	0	0	0	0	0	0	AAEL025629
LOC110676033	0	0.3	0.1	0.5	2.3	1.2	0.3	1.2	0.8	0	0.1	0	0.1	0.1	0.1	AAEL026270
LOC110676034	0.6	0.5	0.7	0.5	0.9	0.5	1.5	1.5	1.6	0.1	0	0	0.4	0.3	0.3	AAEL023736
LOC110676035	0	0.1	0	0	0	0.1	0.1	0.1	0.1	0	0	0	0.1	0	0.1	AAEL027696
LOC110676036	0	0	0	0	0	0	0	0	0	0	0	0	0	0.1	0	AAEL025073
LOC110676037	0	0	0	0	0	0	0	0	0	0	0	0	0	0	0	AAEL026046
LOC110676038	0	0	0	0	0	0	0.1	0	0.1	0	0	0	0	0	0	AAEL021334
LOC110676039	0.9	0.4	0.4	0.1	0.2	0.2	0.3	0.2	0.4	0.1	0	0	0	0	0.2	AAEL025402
LOC110676040	0.1	0	0	0.1	0.1	0.1	0.1	0.1	0	2.7	3	2.3	1.9	4.4	3.5	AAEL023194
LOC110676041	0.9	0.4	0.4	0.1	0	0	2.9	3.3	2.7	0.1	0.2	0	0.2	0.3	0.2	AAEL023421
LOC110676042	514.3	464.6	532.9	802.5	937.6	590.2	3324.4	3027.1	3306	0.5	0.3	0.6	0.2	0.3	0.2	AAEL027928				GO:0046872	metal ion binding
LOC110676043	2.1	1.1	1.4	2.3	3.3	1.9	4.3	3.5	4.2	3.7	3.7	5.4	2.3	3.4	1.3	AAEL025002
LOC110676044	0.2	0.4	0.2	0.1	0	0.1	0.5	0.6	0.2	0	0	0	0.1	0	0	AAEL021549				GO:0003676,GO:0008270	nucleic acid binding,zinc ion binding
LOC110676045	3367.5	3736.6	3337.7	6540	7842.8	7290.4	4778.5	4723.1	4849.5	4979.9	5218.7	5092.8	3339.9	3111.4	2999.8	AAEL022286	40S ribosomal protein S27 [Source:UniProtKB/TrEMBL;Acc:Q1HR58]			GO:0003735,GO:0005840,GO:0006412,GO:0046872	structural constituent of ribosome,ribosome,translation,metal ion binding
LOC110676047	0.3	0	0	0.2	0.2	0	0.2	0.2	0.2	0	0.2	0	0.7	8.8	1.7	AAEL023215
LOC110676048	0	0	0	0	0	0	0.1	0	0	2	10.6	28.2	65.8	76	14.7	AAEL027838
LOC110676049	0	0	0.2	0	0	0	0.1	0	0	2.5	21.2	40.6	79.9	136.5	23.9	AAEL027885
LOC110676050	0	0	0	0	0	0	0	0	0	2.8	22.3	65.9	65.9	131.5	29.2	AAEL027299
LOC110676051	2.1	1.1	1.1	0	0	0	0	0	0	0	0	0	0	0	0	AAEL023832
LOC110676052	0.3	0.4	0.3	0.1	0.1	0	0.1	0	0.1	0	0	0.1	0.4	0.3	0.1	AAEL024380				GO:0005515	protein binding
LOC110676053	1.6	1.2	1.7	4.2	3.5	3.8	4.1	3.9	5.5	0.2	0	0.1	1.3	0.9	1.1	AAEL024483
LOC110676054	0	0.2	0	0	0	0	0.3	0.1	0.2	0.1	0	0.1	0	0	0	AAEL020870
LOC110676055	1.9	3.6	2.3	1.3	2.5	1.1	3.2	3.6	3.6	0.2	0.3	0.1	1.4	0.5	1.5	AAEL025797
LOC110676056	0	0	0	0	0	0	0	0	0	0	0	0	0	0	0	AAEL022064				GO:0003924,GO:0005525,GO:0005874,GO:0007017	GTPase activity,GTP binding,microtubule,microtubule-based process
LOC110676057	0	0	0	0	0	0	0	0	0	0	0	0	0	0	0	AAEL027327				GO:0003676,GO:0003677	nucleic acid binding,DNA binding
LOC110676058	1	1.3	2	2.2	4	2.2	2.6	2.6	3.2	0.3	2.1	0.4	2.5	1.8	3.1	AAEL023708
LOC110676059	8.2	5.5	9.9	25.8	25.7	13.7	25.8	28.7	24.3	1	1.1	0.4	3.3	2.2	2.8	AAEL024649
LOC110676060	2.9	6	3.7	3.9	3.7	3.1	4.8	3	3.3	0	0	0	0.2	0.3	0.2	AAEL021840
LOC110676061	0.2	0	0.1	0.9	0.5	0.7	0.9	0.9	1	0.5	0.9	0.1	0.4	0.1	0.4	AAEL020661
LOC110676062	0	0	0.2	0	0	0	0.3	0.7	0.8	0	0.2	0	0	0	0	AAEL024384
LOC110676063	0	0	0.3	0.5	0.2	0	0.1	0	0.3	1.2	0.6	1.3	0.8	1.1	1.1	AAEL021589				GO:0016491	oxidoreductase activity
LOC110676064	0	0	0	0	0	0	0.1	0.1	0.1	0	0	0	0.1	0.4	0.1	AAEL025270
LOC110676065	0	0	0	0	0	0	0	0	0	0	0	0	0	0	0	AAEL026593
LOC110676066	1.8	1.5	3.2	5.4	3.9	2.9	10.1	12.1	11.2	9.9	10.8	8.9	4.6	3.9	3.7	AAEL021964
LOC110676067	2	2.4	2.6	2.8	2.8	2.9	3.9	4.4	4.2	0.7	0.6	0.5	2	2.3	1.8	AAEL027529
LOC110676068	12	5.8	11	8.1	4	7.6	1.5	1.1	1.2	0.2	0.1	0	0.3	0.1	0.1	AAEL022868
LOC110676069	0	0.7	0.5	0.2	0.4	0.4	0.6	0.4	0.3	0	0.1	0	0	0	0	AAEL025254
LOC110676070	0.3	0.1	0.3	0.4	0.1	0.2	0.2	0.2	0	0.4	1.2	1.3	0.3	0.5	0.3	AAEL023006
LOC110676071	1.5	1.3	2.7	2.5	3.5	2.2	7.3	4.4	5.6	0.1	0.5	0.3	0.5	0.7	1.1	AAEL025821
LOC110676072	5.3	2.3	5.6	3.1	3	3.8	2	3	5	0.3	0	0	0.2	0.3	0	AAEL021212
LOC110676073	0.6	0	0.1	0	0.1	0.1	0	0.5	0.3	0.1	0	0	0.4	0.2	0.6	AAEL027009
LOC110676074	1.2	0.8	2	2.1	3.4	1.8	2.5	3.5	2.9	1.7	0.5	0.9	3.5	2.1	2.2	AAEL022519
LOC110676075	0.2	0.1	0.2	0.3	0.2	0	0	0.2	0	0.6	1.4	2.5	10.1	141.1	45.1	AAEL025406
LOC110676076	0	0	0	0	0	0	0.1	0	0.1	0.2	0	0.6	2.4	23.5	14.1	AAEL021283
LOC110676077	1.5	0.9	1.1	1.9	2.1	1.3	2.7	3.1	4.3	2.8	2.5	3.3	1.7	2.7	1	AAEL020681
LOC110676078	7.6	5.9	5.8	2.2	2.3	2.7	0.9	1.5	1	0	0.4	0	0.4	0	0.2	AAEL025054
LOC110676079	1.5	4.5	2.4	13.3	22.2	11.8	15.9	15.7	22.3	0.4	0.5	0.5	0.4	0.4	0.6	AAEL020284
LOC110676080	0	0	1.2	0.4	0.4	0.2	0.2	0.2	0.2	0.3	0.1	0	0	0	0.2	AAEL021971
LOC110676081	0.7	1.4	0.8	0.8	1.4	0.6	4.2	2.7	3.3	0.2	0.4	0.1	0.4	0.2	0.3	AAEL021355
LOC110676082	0.4	0.8	0.7	0.4	1.2	0.3	1.4	2.1	1.8	0.1	0.3	0.4	0.4	0.3	0.1	AAEL025351
LOC110676083	55.1	49.3	60	40.8	51.1	58.3	10.2	10.3	8.5	0.1	0	0.1	0	0.1	0	AAEL020680
LOC110676084	0.8	0	0.3	0.1	0	0.2	0.1	0.2	0.1	2	2.2	1.8	3.6	3.8	3.7	AAEL024291
LOC110676085	0	0	0	0	0	0	0	0	0	0	0	0	0	0	0	AAEL021765
LOC110676086	0.2	0	0	0.1	0.1	0.1	0	0	0.1	0	0	0	0.1	0	0	AAEL025418
LOC110676087	0	0	0	0	0	0	0.1	0	0.1	0	0.4	0	0	0.4	0	AAEL020966
LOC110676088	0.7	1	0.9	0.9	1	0.5	1.6	1.4	1.6	0.2	0.1	0.1	0.2	0.1	0.2	AAEL024299
LOC110676089	0.3	0	0.2	0.1	0.4	0.2	0.8	0.8	1.1	0.4	0.4	1.2	0.9	0.7	1	AAEL024057
LOC110676090	0	0	0.1	0.6	0	0	0	0	0	0	0	0	0.1	0	0.1	AAEL024587
LOC110676091	62.1	62.2	62	35.3	33.4	32.7	65.5	62	65.5	14	11.8	11.1	28.6	23.9	31.6	AAEL020757	Golgi apparatus membrane protein TVP23 homolog [Source:UniProtKB/TrEMBL;Acc:A0A0P6JRR5]			GO:0016020,GO:0016021	membrane,integral component of membrane
LOC110676092	4.2	6	9.1	4.2	5.7	2.8	13.7	11.1	11.7	26.3	22.7	26.9	32.6	40.6	22.6	AAEL025498				GO:0002376,GO:0005737,GO:0007165,GO:0016787,GO:0034128,GO:0035591,GO:0045087,GO:0048678,GO:0050135,GO:0061809	immune system process,cytoplasm,signal transduction,hydrolase activity,negative regulation of MyD88-independent toll-like receptor signaling pathway,signaling adaptor activity,innate immune response,response to axon injury,NAD(P)+ nucleosidase activity,NAD+ nucleotidase, cyclic ADP-ribose generating
LOC110676093	1.3	2.8	1.3	0.3	0.3	0.3	1.2	0.8	1.3	0	0	0.1	0.1	0.1	0.1	AAEL025721
LOC110676094	1.3	2.7	1.2	0.3	0.3	0.3	1.2	0.8	1.2	0	0	0.1	0.1	0.1	0.1	AAEL026337
LOC110676095	0.5	0.9	1.3	1.4	1.7	1	1.3	1.9	1.7	0.2	0.2	0.3	0.3	0.2	0.3	AAEL022647
LOC110676096	0.6	0.5	1.1	0.9	1.5	0.2	1.2	0.9	0.3	0.3	0	0.1	0.1	0.1	0.3	AAEL027265
LOC110676097	0	0	0.1	0.1	0.1	0	0.1	0.2	0.1	0	0	0	0	0	0	AAEL027315
LOC110676098	0	0	0	0.1	0.1	0	0.1	0	0.2	0	0	0	0	0	0	AAEL020338
LOC110676099	0.3	0.1	0.5	0.1	0.9	1	0.1	0.2	0	0.6	0.5	0.6	0.7	0.3	0.5	AAEL024199				GO:0004930,GO:0007186,GO:0016021	G protein-coupled receptor activity,G protein-coupled receptor signaling pathway,integral component of membrane
LOC110676100	2.8	1.8	1.9	2.6	1.5	1	2.4	2.9	3.6	0	0	0	0.1	0	0.1	AAEL022636
LOC110676101	0	0	0	0	0	0	0.1	0.2	0.1	0	0	0	0	0	0	AAEL024895
LOC110676102	1.1	2	1.2	2.8	3.9	2.7	2.8	2.6	3.3	14.7	9.7	10.8	4.6	3.3	4.3	AAEL027330
LOC110676103	0.5	0.5	0.5	0.2	0.1	0.2	0	0.1	0.2	0.1	0	0	0.1	0.1	0.1	AAEL025985
LOC110676104	6.3	6.5	5.8	23	2.7	4.8	4.2	3.4	3.9	0.1	0.1	0.1	0.3	0.3	0.4	AAEL020276
LOC110676105	0	0	0.1	0	0.1	0	0.7	0.1	0.1	0.1	0	0	0	0.3	0.4	AAEL021585
LOC110676106	163	150.6	157	95.4	104.7	124.1	17.5	21.3	13.1	0.1	0.1	0.1	0	0	0.1	AAEL026111				GO:0003924,GO:0005200,GO:0005525,GO:0005874,GO:0007017	GTPase activity,structural constituent of cytoskeleton,GTP binding,microtubule,microtubule-based process
LOC110676107	5.7	9.8	8.7	6.5	2	1.7	1.3	0.7	1.7	0.1	0.2	0	0.2	0.1	0.3	AAEL022825
LOC110676108	36.2	35.8	30.7	24	29.2	25.9	18.5	19.1	16	0.7	1.1	0.7	3	2.2	2.8	AAEL025285
LOC110676109	0.7	0.6	0.6	0.8	1.3	0.5	0.6	0.6	0.5	2.5	2.4	2.5	2.4	2.4	2.9	AAEL004165	bone morphogenetic protein receptor type II, putative [Source:VB Community Annotation]			GO:0000166,GO:0004672,GO:0004674,GO:0004675,GO:0005524,GO:0006468,GO:0007178,GO:0016020,GO:0016021,GO:0016301,GO:0016310,GO:0016740,GO:0046872	nucleotide binding,protein kinase activity,protein serine/threonine kinase activity,transmembrane receptor protein serine/threonine kinase activity,ATP binding,protein phosphorylation,transmembrane receptor protein serine/threonine kinase signaling pathway,membrane,integral component of membrane,kinase activity,phosphorylation,transferase activity,metal ion binding
LOC110676110	0.1	0	0.2	0.2	0	0.2	0.3	0.1	0.4	0	0	0	0.3	1	0.3	AAEL028007
LOC110676111	0	0	0	0	0	0.1	0	0	0	0	0	0	0	0	0	AAEL024246
LOC110676112	2.6	3.7	1.9	1.6	2	1.3	3.3	3.7	4.2	0.2	0.3	0.1	1.4	0.5	1.4	AAEL020673
LOC110676113	1.8	1.4	2.1	2.8	1.5	0.7	3.2	4.2	2.9	0.6	0.4	0.4	1.2	1.1	2.4	AAEL025405
LOC110676114	3.4	1.2	1.7	1.8	2.2	1.5	3.8	4.1	4.5	5.3	3.5	4.6	3.8	3.4	4.3	AAEL020322
LOC110676115	0.9	0.7	1	0	0.1	0.2	0.3	0.2	0.3	0.2	0.1	0	0.2	0.1	0.2	AAEL026462
LOC110676116	0.5	0.5	0	0	0.4	0	0	0	0.6	0	0	0	0.2	0	0	AAEL023062
LOC110676117	0.1	0.5	0.2	0.3	0	0.1	0.2	0.3	0.1	0	0	0	0.2	0	0	AAEL027687
LOC110676118	0.1	0	0.1	0	0	0	0	0	0	0	0	0	0	0	0	AAEL023724
LOC110676119	0.4	0.2	0.4	0.8	1.4	0.7	1	1.1	1.9	0	0	0	0	0	0.1	AAEL020879
LOC110676120	0	0	0	0	0	0	0	0	0	0	0	0	0	0	0.4	AAEL022533
LOC110676121	0.5	0.4	0.7	1.7	1.7	0.8	2.4	2	3.1	0	0.1	0.1	0.6	0.2	0.1	AAEL019614
LOC110676122	0.2	0.2	0.2	0	0.6	0.4	0.2	0.2	0.1	0	0	0	0	0	0.1	AAEL023908
LOC110676123	0	0	0	0	0	0	0	0	0	0	0	0	0	0	0	AAEL020808
LOC110676124	0	0	0	0	0	0	0	0	0	0	0	0	0	0	0	AAEL024511
LOC110676125	0	0	0	0	0.1	0	0.1	0.1	0	0	0	0	0	0	0	AAEL022468
LOC110676126	2.1	1.6	2.6	1.8	3	2.6	8.7	9.1	7.6	23.5	25.8	24.3	29.2	35	28.1	AAEL026075
LOC110676127	0.6	0.6	0.1	0.4	0.1	0.4	0.1	0.3	0.2	1	1.1	1.5	3.9	21.8	11.4	AAEL023652
LOC110676128	0	0	0.1	0.3	0.3	0.3	0.4	0.9	0.2	8.3	6.5	9.7	20.5	20.9	19.7	AAEL026712
LOC110676129	0.1	0	0	0	0	0	0	0	0	0.2	0.3	0.3	0.8	0.9	0.5	AAEL024753
LOC110676130	0.8	0.6	0.4	0.3	0.2	0.3	0.7	0.7	1	6.2	9.5	7.2	6.6	5.6	3	AAEL022720
LOC110676131	0.4	0.6	1.2	0.5	3.1	1.7	1.7	1.5	1.4	2	3.3	2.2	3.4	4.9	5.6	AAEL022919
LOC110676132	1	1.4	1	2.6	3.3	2.5	2.4	2.6	3	13.2	9.3	9.6	4	3.2	3.9	AAEL026351
LOC110676133	0.4	0.2	0.2	0	0	0	0	0	0	0	0	0	0	0	0	AAEL022021
LOC110676134	0	0	0	0	0.1	0	0.1	0	0	0.3	0.6	0.3	0.6	2.2	0.4	AAEL025515
LOC110676135	0	0	0	0	0	0	0	0	0	33.2	27.3	53.5	5.5	36.8	8.5	AAEL023723				GO:0004252,GO:0006508	serine-type endopeptidase activity,proteolysis
LOC110676136	0.7	0.7	0.4	0.5	0.9	0.8	1.1	0.9	1.4	0	0	0	0.1	0	0.1	AAEL027255
LOC110676137	0.4	0.5	0.3	0.1	0.1	0	0.3	0.3	0.2	0.3	0	0.1	0.3	0.1	0.2	AAEL022916
LOC110676138	0.8	0.2	0.9	0.4	0.4	0.4	0.5	0.2	0.5	0	0.1	0	0.1	0	0.2	AAEL026262
LOC110676139	2.7	2.1	1.8	3.2	2.9	3.1	19.4	13.5	14.9	64	72.2	81.5	60.2	60.3	36.9	AAEL026446
LOC110676140	0.9	0.8	1.4	1.2	1.3	1.5	0.6	0.8	0.4	0.9	0.8	0.8	0.3	0.4	0.3	AAEL020416
LOC110676141	1.1	1.2	1.1	0.8	0.9	0.5	2.3	2.2	2.4	0.1	0.2	0.1	0.2	0.1	0.3	AAEL020227				GO:0003676	nucleic acid binding
LOC110676142	0	0	0	0.5	1.3	0	0	0.3	0	60.6	59.6	53.2	53.8	40	50.2	AAEL025440
LOC110676143	6.3	6	6.4	6.3	7.3	4.3	2.4	2.6	3.3	2.7	6.6	17.5	24.6	20.6	8.2	AAEL021060
LOC110676144	1.5	0.5	0.7	5.3	2.9	0.3	5.3	10.5	11	4.1	6.5	17.5	22.1	20	12.1	AAEL025773
LOC110676145	6.5	5.9	9.4	6	0.7	0.5	0.2	0.2	0	0.3	0.7	1.5	1.2	1.8	1	AAEL023249
LOC110676146	0	0.1	0	0	0	0	0	0	0	0	0	0	0	0	0	AAEL027875
LOC110676147	0	0	0	0	0	0	0	0	0.2	0	0.1	0.2	0.3	0.8	0.2	AAEL020342
LOC110676148	6.3	6.4	10.1	3.7	0.4	0.1	1.4	1.8	0.9	69.1	91.7	188.8	462.9	501.9	148.9	AAEL025092
LOC110676149	0.1	0	0.1	0	0.1	0.1	0.3	0	0.2	3.3	3.5	6	13.3	18.1	5.5	AAEL024968
LOC110676150	0	0	0	0	0	0	0	0.3	1.2	0.2	0.2	0.5	0.5	0.2	0	AAEL020963
LOC110676151	16.8	16.4	19.7	11	21.3	8.7	19.3	26.3	32.2	379	362.6	337.5	773.1	439.5	727.6	AAEL022658
LOC110676152	1.7	2.8	3.2	1.5	2	1.6	2.7	1	3	84.5	140.9	451.8	238.1	386.3	152.2	AAEL027052
LOC110676153	0.5	0.2	0.4	0.3	0.5	0.4	1	0.8	0.8	0	0	0.1	0.1	0	0.1	AAEL023448
LOC110676154	0	0	0.1	0.1	0.2	0	0.2	0.1	0.1	0.1	0.1	0.1	0.1	0.1	0	AAEL027961
LOC110676155	1.7	3.7	2.2	1.3	2.4	1	9.4	11.4	8.9	2.4	2.1	1.8	3.5	4.2	3.6	AAEL020159
LOC110676156	0.6	0.7	0.6	0.5	0.7	0.4	0.9	0.9	1	0.1	0	0.3	0.5	0.9	0.7	AAEL024961
LOC110676157	14.3	15.3	15.7	8.1	4.2	5.2	2.1	2.7	1.3	41.4	39.4	34.6	4.5	6.4	3	AAEL021017
LOC110676158	0	0	0	0	0	0	0	0	0	0	0	0.1	0	0	0	AAEL025799
LOC110676159	5.6	6.4	9.4	4.1	3.5	3.1	2.8	2.2	1.7	0.3	0.2	0.1	0.4	0.5	0.8	AAEL023446
LOC110676160	0	0	0	0.2	0.1	0	0.2	0.1	0	0	0	0	0.4	0.1	0.1	AAEL026587
LOC110676161	0	0	0	0	0	0	0.1	0.2	0	0	0.1	0	0.1	0	0	AAEL026194
LOC110676162	0	0	0.3	0.2	0	0.1	0.1	0.3	0.1	0	0.1	0	0.1	0	0	AAEL022754
LOC110676163	1.3	1.7	0.9	0	0.4	0.5	0.9	0.4	1.2	0.1	0.2	0	0	0.2	0	AAEL027379
LOC110676164	0	0	0.1	0.2	0	0.1	0.1	0.3	0.1	0	0.1	0	0.1	0	0	AAEL023916
LOC110676165	0.1	0	0.1	0	0.2	0.2	0.2	0.3	0.2	0	0	0	0.1	0.1	0	AAEL026021
LOC110676166	0.1	0.1	0.1	0.5	0.5	0.4	0.1	0.1	0.2	0	0.1	0	0	0.1	0.1	AAEL020765
LOC110676167	0	0.1	0	0.1	0.3	0.1	0.3	0.3	0.3	0.1	0.2	0.2	0.2	0.1	0.5	AAEL026914
LOC110676168	0.1	0.1	0.1	0.1	0.1	0.1	0.6	0.5	0.7	0.1	0.1	0.2	0.1	0.2	0.2	AAEL021177
LOC110676169	2.1	2.8	2.4	1.8	1.3	2.1	1.6	1.6	1.6	0.2	0.1	0.1	0.4	0.6	0.4	AAEL021504
LOC110676170	0	0	0.1	0	0.1	0	0.4	0.3	0.4	0	0.1	0.2	0	0	0	AAEL022753
LOC110676171	0	0	0	0.3	0.3	0	0.5	0.4	0.5	0.1	0.8	0.2	0.1	0	0	AAEL027030
LOC110676172	0.2	0	0	0	0	0	0	0.2	0.2	0.2	0.1	0	0.3	0.2	1.2	AAEL022641
LOC110676173	0	1.2	0.5	0.5	0	0.4	1	0.4	2	4.4	6.8	5.1	28.5	23.5	26	AAEL019526
LOC110676174	0	0	0	0	0	0	0	0	0.1	0	0	0	0	0.2	0.1	AAEL025343				GO:0042302	structural constituent of cuticle
LOC110676175	0	0.1	0	0	0	0.1	0.1	0.1	0.1	0	0.1	0	0	0.3	0	AAEL020566
LOC110676176	0.1	0.4	0.3	0.3	0.1	0.4	0.3	0.1	0.1	0.1	0	0.2	0.7	0.8	0.7	AAEL024269
LOC110676177	0.2	0.4	0.5	0.2	0.2	0.2	0.3	0.3	0.2	0.3	0.5	0.2	0.8	0.9	2	AAEL020461
LOC110676178	0	0	0	0	0	0	0	0	0.1	0	0	0	0	0	0	AAEL028064
LOC110676179	0	0	0	0	0	0	0	0	0.2	0	0	0	0	0	0	AAEL023546
LOC110676180	0	0	0	0	0	0	0	0	0	0	0	0	0.4	0.4	0	AAEL021652
LOC110676181	2.5	3.7	2.9	2.4	2.9	1.8	5.2	5.9	6.2	0.9	0.9	0.7	4.3	4.6	4.1	AAEL022999
LOC110676182	0.9	0.2	0.9	1.5	0.1	0.7	0.1	0.3	0.5	0.1	0.2	0.2	1.6	1.2	0.3	AAEL026680
LOC110676183	0.1	0	0.3	0	0.3	0	0	0	0.4	0.6	0.4	0.4	2.1	1.6	1.8	AAEL022322
LOC110676184	0.3	0	0.3	0	0.3	0	0.1	0	0	0	0	0	0	0	0	AAEL027604
LOC110676185	0	0	0	0.1	0.1	0	0.1	0.2	0.1	0	0	0	0.1	0.2	0	AAEL021968
LOC110676186	0	0	0.2	0.6	1.4	1	0.4	0.9	0.5	0	0	0	0	0.1	0	AAEL025519
LOC110676187	1.3	0.8	1.1	0.6	0.4	0.4	0.4	0.5	0.2	0.1	0	0	0.1	0.1	0.1	AAEL021251
LOC110676188	0	0	0	0	0	0	0.4	1.1	4.8	0	0	0.2	0.9	0.2	0.4	AAEL024549
LOC110676189	0.6	0	0.1	0	0	0	0	0	0	0	0.5	0.5	119.9	461.1	38	AAEL020059
LOC110676190	0.7	0.9	1	0.2	0.5	0.1	0.4	0.8	0.5	74.9	117.3	242.8	525	491.5	199.4	AAEL025037
LOC110676191	0.1	2.6	0.9	1.5	0.6	1.4	1.9	1.4	1.1	0	0.6	0.2	0.4	0.7	0.5	AAEL021189
LOC110676192	1.7	2.4	1.7	4.3	5.5	4.2	4.1	4.3	5	22.1	15.5	16.1	6.7	5.3	6.3	AAEL025805
LOC110676193	1.1	0.3	0.3	2	1.4	0.5	1.9	1.6	1.8	0	0.2	0	0.3	0.1	0.1	AAEL022502
LOC110676194	0.3	1.2	0.7	0.8	0.5	1	0	0.3	0.1	0	0.1	0	0	0	0	AAEL026986
LOC110676195	0	0	0	0	0	0	0.1	0	0	0.2	0.2	0.2	0.2	0.4	0.3	AAEL024120
LOC110676196	0.9	1.2	1	0.7	0.9	0.4	0.9	0.6	0.7	0.9	0.7	0.7	2.5	4.9	2.6	AAEL020353
LOC110676197	7.1	20.5	22.2	1.2	2.8	4.8	68.3	57.6	55.7	0.1	0.2	0.2	0.7	0.6	1.1	AAEL024221
LOC110676198	0.8	0.2	0.3	0.5	0.7	0.3	0.3	0.1	0.4	0	0	0.1	0.1	0	0	AAEL021631
LOC110676199	7.3	8.1	9.2	1.7	5.5	3.8	2.1	1.9	1.3	7.1	9.2	4.9	8.5	6.5	7.6	AAEL025613				GO:0016746	transferase activity, transferring acyl groups
LOC110676200	16	18.3	16.1	7.5	0.4	0.2	1.2	1.5	1.2	2.4	1.4	2.6	1.9	2.2	2.2	AAEL024240
LOC110676201	17.4	12.4	14.5	9.5	7.3	6.6	2.7	3	2.1	104.7	59.7	72.5	49.7	40	44.7	AAEL021375				GO:0004553,GO:0005975	hydrolase activity, hydrolyzing O-glycosyl compounds,carbohydrate metabolic process
LOC110676202	0.1	0	0.1	0	1.2	0.7	0.1	0.1	0.1	0.2	0.1	0.1	0.1	0.2	0.1	AAEL026074				GO:0004222,GO:0005886,GO:0006508,GO:0008233,GO:0008237,GO:0016787,GO:0046872	metalloendopeptidase activity,plasma membrane,proteolysis,peptidase activity,metallopeptidase activity,hydrolase activity,metal ion binding
LOC110676203	0	0	0	0	0	0	0	0	0	13	19.9	15	5.6	4.1	7	AAEL022291
LOC110676204	0	0.1	0	0.1	0	0	0.1	0.1	0.1	0	0	0	0	0	0	AAEL026959
LOC110676205	0.1	0.4	0.1	0	0.6	1.1	0.2	0.1	0.1	0	0.1	0	0	0	0	AAEL023201
LOC110676206	1	1.4	1.6	0.4	0.2	0.4	0.2	0.6	0.1	0.1	0	0	0.2	0	0.1	AAEL027854
LOC110676207	0.3	0	0.1	0.2	0.1	0.1	0.1	0.1	0.3	4.9	3.2	3	0.4	0.4	0.8	AAEL025086
LOC110676208	0.8	1.6	2.5	3.2	5.1	2.9	6.6	8.3	7.2	10.6	8.9	6.6	14.8	12.6	21.8	AAEL020327
LOC110676209	0	0.3	0.4	1	1.7	0.9	0.6	1.8	1	2.6	0.9	2.6	5	10	8.7	AAEL025719
LOC110676210	0.2	0.1	0.3	0.2	0	0	0.1	0	0	0	0	0	0	0	0	AAEL022039
LOC110676211	0.7	0.6	0.8	0.6	1.1	0.6	1.8	1.8	2	0.1	0	0	0.5	0.4	0.3	AAEL022722
LOC110676212	4.9	3.5	4.3	1.9	3.4	4.2	2.4	2.4	2.3	0.2	0.1	0	0.2	0.2	0.2	AAEL027457
LOC110676213	1.3	1.1	1.5	0	0.1	0.4	0.1	0.1	0.1	0	0	0	0	0	0	AAEL020334				GO:0003676	nucleic acid binding
LOC110676214	3.9	5.1	4.1	0	0.2	0.3	1.4	0.7	1	0	0	0	0	0	0	AAEL025060				GO:0008270	zinc ion binding
LOC110676215	2.1	2.8	2.4	1.8	1.3	2.2	1.6	1.6	1.6	0.2	0.1	0.1	0.4	0.6	0.4	AAEL020877
LOC110676216	0	0	0	0.1	0.1	0.1	0	0	0.2	0.4	0	0.2	0.4	0.1	0.1	AAEL025595
LOC110676217	0	0	0	0	0	0	0.2	0	0.5	0	0	0	0.2	0	0	AAEL022073
LOC110676218	0.4	0.3	0.1	0.3	0	0.1	0.2	0.2	0.3	0.3	0.1	0.2	0.1	0.1	0.1	AAEL022241
LOC110676219	1.4	1.2	0.6	2.2	0	0.5	0.8	1.9	1.4	0	0	0	0.7	0.4	0.2	AAEL027420
LOC110676220	0.4	0.3	0.1	0.6	0.5	0.3	0.5	0.6	0.4	0	0.2	0.1	0.3	0	0	AAEL022997
LOC110676221	0.2	0	0.2	0.2	0.9	0.2	0.1	0.2	0.3	45.5	40.7	38.2	23.6	21.5	23.7	AAEL026834
LOC110676222	0.2	0.3	0.1	0.7	1.9	1	0.7	1.2	0.6	0	0	0.2	0.1	0.1	0.1	AAEL022329
LOC110676223	25.7	29.1	28.4	18	19.5	15.4	45	49.3	46.4	13.6	14.7	13.3	9.5	8	7.8	AAEL027472				GO:0000166,GO:0003676,GO:0003724,GO:0004386,GO:0005524,GO:0016787	nucleotide binding,nucleic acid binding,RNA helicase activity,helicase activity,ATP binding,hydrolase activity
LOC110676224	50	56	60.6	47.7	59.5	48.5	88.6	91.3	90.5	32.9	32.7	34.2	54.5	51.5	62.5	AAEL020597				GO:0005515,GO:0005737,GO:0016020	protein binding,cytoplasm,membrane
LOC110676225	0	0.3	0.3	0.5	0.5	0.4	0.7	0.6	0.2	0	0	0	0.1	0	0	AAEL024305
LOC110676226	0.5	0.1	0.3	1	1.1	0.8	0.5	0.4	0.7	0.2	0.3	0.1	0.1	0.4	0.1	AAEL022063
LOC110676227	0.2	0.3	0.2	0.1	0	0	0.1	0.1	0.1	0	0	0	0	0.1	0	AAEL023113
LOC110676228	0.1	0.2	0	0	0	0	0	0	0	0	0	0	0	0	0	AAEL026682
LOC110676229	0.1	0.1	0	0	0	0	0	0	0	0	0	0	0	0	0	AAEL024016
LOC110676230	42.3	41.5	45.5	21.5	18.2	20.4	68.2	64.8	62.4	4.1	4.1	3.2	14	11.2	13.1	AAEL023044
LOC110676231	0	0	0.2	0.2	0.1	0	0.7	0.8	0.7	0.8	0.9	1	6.9	42.8	37.7	AAEL027975				GO:0042302	structural constituent of cuticle
LOC110676232	2169.2	2102.4	1993.4	3196	3542.8	3026.7	3350.6	3231	3469.2	4086.7	4396.4	4271	3339.3	3098.1	3166.7	AAEL023983	40S ribosomal protein S4 [Source:UniProtKB/TrEMBL;Acc:Q1HRS6]			GO:0003723,GO:0003735,GO:0005840,GO:0006412,GO:0019843	RNA binding,structural constituent of ribosome,ribosome,translation,rRNA binding
LOC110676233	3.1	3.8	3.4	3.8	4	2.4	7.8	6.5	7.1	0.9	0.8	0.7	2.2	1.2	1	AAEL024833
LOC110676234	0.2	0.3	0.2	0.1	0	0.1	0.3	0.3	0.3	0	0	0	0.1	0	0.1	AAEL023359				GO:0003676,GO:0008270	nucleic acid binding,zinc ion binding
LOC110676235	48.4	52.1	59.1	24.8	23	20.6	41.6	45.7	40.4	21.1	21.2	20.6	33.2	39.2	31.3	AAEL022750				GO:0005515	protein binding
LOC110676236	0.9	1	0.4	0.8	1.1	0.9	0.5	0.3	0.4	0.1	0.1	0.1	0.1	0	0.1	AAEL021173				GO:0007155,GO:0007229,GO:0008305,GO:0016020,GO:0016021	cell adhesion,integrin-mediated signaling pathway,integrin complex,membrane,integral component of membrane
LOC110676237	0.8	1.1	0.7	0.6	1.4	2.5	2.1	1.7	2.4	0	0.2	0	0.1	0	0	AAEL024122
LOC110676238	0	0	0	0	0	0	0	0.8	0	0	0	0	0	0	0	AAEL026234
LOC110676239	0.1	0.1	0	0	0.4	0	0	0	0	0.4	0.1	0.3	0.3	0.4	0.2	AAEL020809
LOC110676240	4.2	3.6	5.1	1.5	1.2	0.6	5.9	6	5.8	62.7	57.8	54.5	7.8	11.2	5.2	AAEL025610				GO:0005515	protein binding
LOC110676241	0.3	0.4	0.3	0.1	0	0.1	0.4	0.3	0.2	0.1	0.2	0.1	0.4	0.4	0.5	AAEL020164
LOC110676242	1.6	1.7	2.6	0.9	1.4	0.9	3	2.3	3.1	0.2	0.8	0.2	2.8	1.9	2.3	AAEL024526
LOC110676243	0.1	0	0.4	0	0.3	0.2	0.3	0.3	1.1	0	0	0	0.2	0	0	AAEL023899
LOC110676244	24.5	27	25.8	14.6	11.1	7.5	65.3	64.6	63.4	3.8	4.6	4.4	24.7	22	34.3	AAEL027354				GO:0005975,GO:0016773	carbohydrate metabolic process,phosphotransferase activity, alcohol group as acceptor
LOC110676245	0.8	0.7	1.3	1.2	1	1.3	0.6	0.7	0.5	0.8	0.8	0.7	0.2	0.4	0.2	AAEL023079
LOC110676247	0.2	0.1	0.2	0.8	0.3	0.5	0.3	0	0.2	0.6	0	0.3	0.5	0.8	0.1	AAEL025581
LOC110676248	0	0	0.1	0.1	0.3	0.2	0.5	1	0.7	0	0	0	0.1	0	0	AAEL020843
LOC110676249	0.9	0.5	1.5	0.3	1.9	0.6	3.2	3	2.2	12.3	12.7	10.2	7.1	6.9	5.6	AAEL024520
LOC110676250	0	0	0	0	0	0	0	0	0	0	0.1	0	0	0	0	AAEL020838
[truncated: 17,260 more rows]
