# Supplementary material for: Engineered Antiviral Sensor Targets Infected Mosquitoes
Source: bioRxiv preprint, doi:10.1101/2023.01.27.525922, version 1 (2023-01-27)
Supplement: Table S6 [file 525922_file08.xlsx]

## Sheet: Sheet1
NCBI_ID	341_Ub: CasRx-NLS_Larvae-replica1	341_Ub: CasRx-NLS_Larvae-replica2	341_Ub: CasRx-NLS_Larvae-replica3	22869.R_416-U6_gRNAarray_Larvae-replica1	22869.R_416-U6_gRNAarray_Larvae-replica2	22869.R_416-U6_gRNAarray_Larvae-replica3	Transhet-no visual reduction-replica1	Transhet-no visual reduction-replica2	Transhet-no visual reduction-replica3	Transhet reduction_replica 1	Transhet reduction_replica 2	Transhet reduction_replica 3	AAEL_ID	gene_description	gene_name	gene_synomym	GO_ID	GO_name
LOC5568414	78.2856	285.759	158.621	89.4495	186.671	90.8732	160.029	49.9589	57.2937	74.2786	58.2659	105.563	AAEL006830	yellow protein precursor [Source:VB Community Annotation]			GO:0042438,GO:0060179	melanin biosynthetic process,male mating behavior
casRx	0.2805	0.677988	0.169828	0	0	0	0.185704	0.372599	0.259639	0.191164	0.104087	0.0309352	construct
sgRNA_EGFP	0	0	0	0.491182	0.344185	0.43932	0	0.351724	0	0	0	0.43803	construct
sgRNA_yellow	0	0	0	0.163196	0	0	0	0	0	0	0	0	construct
EGFP	4.65718	1.43626	19.8232	1419.55	1134.87	1094.27	547.587	477.059	459.97	96.3335	146.074	160.436	construct
LOC110673976	3.06796	2.6459	1.84034	1.97799	2.78955	1.95331	4.00843	5.20013	4.32705	1.69408	2.67389	4.15296	AAEL019902				GO:0030246	carbohydrate binding
LOC110673977	2.09184	1.86278	2.65965	1.83673	2.13016	2.4989	2.24352	2.25073	2.84908	2.36652	2.25108	1.79946	AAEL005449	protein kinase c alpha binding protein [Source:VB Community Annotation]			GO:0003779,GO:0005515,GO:0005737,GO:0005856,GO:0016020,GO:0019904,GO:0043005,GO:0048471	actin binding,protein binding,cytoplasm,cytoskeleton,membrane,protein domain specific binding,neuron projection,perinuclear region of cytoplasm
LOC110673978	2.01535	0.42929	7.7184	0.556431	0.731076	7.34078	0.446819	0.747089	0.842869	0.102213	0.973945	1.07514	AAEL019718				GO:0004129,GO:0005739,GO:0005743,GO:0005746,GO:0009055,GO:0016020,GO:0016021,GO:0022900,GO:1902600	cytochrome-c oxidase activity,mitochondrion,mitochondrial inner membrane,mitochondrial respirasome,electron transfer activity,membrane,integral component of membrane,electron transport chain,proton transmembrane transport
LOC110673979	26.9661	25.0076	20.207	25.7605	27.8894	24.5103	31.6609	37.2217	31.1103	31.4733	35.4258	30.8172	AAEL001085				GO:0005623,GO:0015035,GO:0045041,GO:0055114	obsolete cell,protein disulfide oxidoreductase activity,protein import into mitochondrial intermembrane space,oxidation-reduction process
LOC110673980	24.6137	31.1498	19.1432	24.9993	11.3138	23.8157	21.3062	35.8623	34.5988	14.2435	13.3743	16.4057	AAEL010764	aldehyde dehydrogenase [Source:VB Community Annotation]			GO:0003824,GO:0005737,GO:0006730,GO:0009058,GO:0009258,GO:0016155,GO:0016491,GO:0016620,GO:0016742,GO:0055114	catalytic activity,cytoplasm,one-carbon metabolic process,biosynthetic process,10-formyltetrahydrofolate catabolic process,formyltetrahydrofolate dehydrogenase activity,oxidoreductase activity,oxidoreductase activity, acting on the aldehyde or oxo group of donors, NAD or NADP as acceptor,hydroxymethyl-, formyl- and related transferase activity,oxidation-reduction process
LOC110673981	32.3621	25.3196	27.0337	27.2486	20.2902	23.0651	20.9564	21.4545	19.6607	30.1116	43.9346	19.2173	AAEL010650	sodium/solute symporter [Source:VB Community Annotation]			GO:0016020,GO:0016021,GO:0022857,GO:0055085	membrane,integral component of membrane,transmembrane transporter activity,transmembrane transport
LOC110673982	12.1885	12.6529	10.5294	10.6087	11.4047	11.5203	11.462	12.6668	11.6534	12.7312	12.7135	11.745	AAEL025907				GO:0003824,GO:0004721,GO:0004722,GO:0006470,GO:0016787,GO:0016791,GO:0043169,GO:0046872	catalytic activity,phosphoprotein phosphatase activity,protein serine/threonine phosphatase activity,protein dephosphorylation,hydrolase activity,phosphatase activity,cation binding,metal ion binding
LOC110673983	20.1831	21.5322	25.5519	18.0401	16.7906	18.5371	19.3151	22.4834	21.2772	25.1954	21.2804	20.0792	AAEL003281	ADP-ribosylation factor, arf [Source:VB Community Annotation]			GO:0000166,GO:0005525	nucleotide binding,GTP binding
LOC110673984	24.5539	17.2266	29.1124	27.075	21.739	31.0776	16.8832	17.6375	18.2278	18.1533	19.3825	12.7209	AAEL003188	sphingosine phosphate lyase [Source:VB Community Annotation]			GO:0003824,GO:0016829,GO:0016831,GO:0019752,GO:0030170	catalytic activity,lyase activity,carboxy-lyase activity,carboxylic acid metabolic process,pyridoxal phosphate binding
LOC110673985	13.3164	9.90461	9.13218	13.4796	9.2011	13.227	10.0438	16.092	14.4166	9.50602	6.92444	12.1904	AAEL001289	permease, putative [Source:VB Community Annotation]			GO:0016020,GO:0016021,GO:0022857,GO:0055085	membrane,integral component of membrane,transmembrane transporter activity,transmembrane transport
LOC110673986	0	0	0	0	0	0	0	0	0	0	0	0	AAEL022439	Odorant receptor [Source:UniProtKB/TrEMBL;Acc:J9HFZ2]
LOC110673987	16.5637	9.50412	11.7642	9.20118	7.79299	11.2563	8.63024	10.2098	10.6921	7.54304	6.50293	6.03544	AAEL027089	Endoplasmic reticulum resident protein 29 [Source:UniProtKB/TrEMBL;Acc:Q16HE7]
LOC110673988	4.81824	3.48699	1.91886	5.98511	4.56508	3.60036	10.9448	11.492	14.6115	2.80208	4.397	8.97445	AAEL022454
LOC110673989	47.6726	43.8107	27.376	40.0478	33.61	35.6641	36.9045	48.2455	48.681	37.3475	34.1403	67.8346	AAEL025921
LOC110673990	10.9448	9.94644	8.94399	8.48879	7.14222	9.70524	8.34877	7.72942	9.07667	9.47832	8.26715	8.70273	AAEL025712
LOC110673991	22.6298	21.6105	23.2801	21.475	21.7662	23.6415	18.7004	21.7563	21.4265	23.1235	23.5922	22.2849	AAEL002938	skd/vacuolar sorting [Source:VB Community Annotation]
LOC110673992	5.0102	4.12498	4.90798	5.17959	5.21007	5.57917	5.42641	4.72596	4.28771	5.21768	3.56514	4.76809	AAEL011904	zinc finger protein [Source:VB Community Annotation]			GO:0003676	nucleic acid binding
LOC110673993	36.7987	48.061	38.8767	35.7859	37.634	39.5619	38.3151	31.824	30.2852	39.4692	37.4986	36.2804	AAEL026310				GO:0005515	protein binding
LOC110673994	3.53263	4.22665	1.99105	2.98663	3.07243	2.33027	3.06164	3.95879	3.73703	3.92209	3.62279	3.17345	AAEL005252	corazonin [Source:VB Community Annotation]	Crz		GO:0005184,GO:0005576,GO:0007218,GO:0045823,GO:0071858	neuropeptide hormone activity,extracellular region,neuropeptide signaling pathway,positive regulation of heart contraction,corazonin receptor binding
LOC110673995	1.26856	1.29102	1.72041	1.38054	1.38512	1.51541	1.44452	2.02208	1.97938	1.41784	1.44358	1.39903	AAEL025468
LOC110673996	30.4741	20.1743	34.2879	39.6126	43.6066	40.9091	46.1567	61.257	58.5113	49.0256	55.2123	37.1605	AAEL022067
LOC110673997	64.3752	62.0139	67.0336	49.3945	43.871	54.7071	37.0587	28.4983	28.4034	34.2565	37.101	26.4411	AAEL024696
LOC110673998	3.0713	2.86279	1.58493	2.81139	2.26851	2.23516	2.28038	2.2877	2.3988	3.4429	2.27228	2.68444	AAEL006293				GO:0005267,GO:0006811,GO:0016020,GO:0016021,GO:0071805	potassium channel activity,ion transport,membrane,integral component of membrane,potassium ion transmembrane transport
LOC110673999	9.42879	12.3774	8.89311	9.51593	10.8589	11.5199	11.3636	11.9792	10.4493	12.6342	11.4006	10.1592	AAEL006993	synapse-associated protein [Source:VB Community Annotation]
LOC110674000	2.51642	2.38437	2.47972	2.48961	2.0754	2.84101	2.02215	2.25917	2.24895	1.89238	2.27543	1.99052	AAEL025565
LOC110674001	1.21316	0.785685	1.1752	0.909267	1.68208	1.26869	1.09036	1.99238	1.32224	0.841815	0.836689	0.940612	AAEL007814	n-twist [Source:VB Community Annotation]			GO:0046983	protein dimerization activity
LOC110674002	10.9415	10.5212	14.2622	15.4017	12.2146	14.2382	11.0361	10.1311	9.21968	9.95699	11.5833	9.4051	AAEL024681				GO:0003824	catalytic activity
LOC110674003	9.65727	10.8814	6.56603	8.18946	8.10888	8.55884	8.33939	8.54146	8.42348	9.14058	9.91237	9.94936	AAEL007884	conserved membrane protein at 44E, putative [Source:VB Community Annotation]			GO:0072659	protein localization to plasma membrane
LOC110674004	2.73002	1.94486	2.67105	2.53887	2.14339	2.98345	2.40022	3.64089	3.2201	2.02427	2.2287	1.64993	AAEL009701				GO:0000077,GO:0005634,GO:0042025	DNA damage checkpoint,nucleus,host cell nucleus
LOC110674005	4.92512	5.54711	5.3056	4.55728	5.60713	5.22866	5.28063	5.46993	4.78959	6.1635	5.60012	4.50759	AAEL014355	symbol, putative [Source:VB Community Annotation]			GO:0016020,GO:0016021	membrane,integral component of membrane
LOC110674006	0.0427156	0.0882617	0.0840123	0	0	0	0	0.0233841	0.0876357	0.11715	0.19213	0.114204	AAEL026025
LOC110674007	47.6816	34.7044	29.1989	29.5191	37.0461	26.592	41.952	43.2388	44.5383	77.8084	79.1053	47.954	AAEL007669	oxidoreductase [Source:VB Community Annotation]			GO:0055114	oxidation-reduction process
LOC110674008	2.69894	2.98801	3.0148	1.94851	4.49436	2.61416	2.91685	2.40299	2.13168	3.05234	2.69308	5.22905
LOC110674009	0.0665213	0.0676996	0.0644401	0.0329063	0.121056	0.264886	0.105696	0.0706902	0.0175926	0	0.0329127	0.117381	AAEL018183				GO:0005515,GO:0005737,GO:0008270,GO:0046872	protein binding,cytoplasm,zinc ion binding,metal ion binding
LOC110674010	81.805	63.3287	55.4279	52.9296	68.0233	91.8616	77.6506	73.8678	70.7238	16.7977	47.0076	53.3615	AAEL019650
LOC110674011	1.02608	2.3272	1.03184	2.02063	2.17468	1.72945	1.22146	1.85885	0.961399	0.980333	1.25709	1.18982	AAEL020016
LOC110674012	0.0675479	0	0.0420651	0.0190938	0.0250866	0.0384249	0.0204433	0.0338397	0.142912	0	0.0811643	0.0595964	AAEL024896
LOC110674013	48.1908	53.0485	31.7692	39.7231	38.4744	38.0373	54.6452	52.3536	51.8581	62.0879	54.8928	66.3643	AAEL021035				GO:0005789,GO:0016020,GO:0030314	endoplasmic reticulum membrane,membrane,junctional membrane complex
LOC110674014	4.70942	5.17373	4.95485	4.59753	4.08649	6.09915	4.29478	5.07085	5.31184	3.87694	3.8886	3.49465	AAEL023474
LOC110674015	2.60001	2.14546	3.04078	1.7151	3.21525	3.41997	3.39947	4.20641	3.71683	2.22211	2.03947	2.14949	AAEL028201				GO:0007093,GO:1990423	mitotic cell cycle checkpoint,RZZ complex
LOC110674016	20.5982	19.7527	17.0505	8.65977	24.1901	11.7865	23.7338	16.1767	16.3551	15.7691	16.115	21.783	AAEL022632
LOC110674017	7.08334	6.38898	9.79479	6.70557	5.82515	11.1348	6.14966	6.40555	6.16087	11.1162	12.1219	5.39175	AAEL027018				GO:0003865,GO:0005783,GO:0005789,GO:0006486,GO:0006488,GO:0006629,GO:0016020,GO:0016021,GO:0016095,GO:0016491,GO:0016627,GO:0019348,GO:0055114,GO:0102389	3-oxo-5-alpha-steroid 4-dehydrogenase activity,endoplasmic reticulum,endoplasmic reticulum membrane,protein glycosylation,dolichol-linked oligosaccharide biosynthetic process,lipid metabolic process,membrane,integral component of membrane,polyprenol catabolic process,oxidoreductase activity,oxidoreductase activity, acting on the CH-CH group of donors,dolichol metabolic process,oxidation-reduction…
LOC110674018	1382.98	1275.53	1307.9	1134.58	1222.82	1209.81	1235.93	1200.45	1221.21	1175.12	1150.7	1276.92	AAEL021422	60S ribosomal protein L18a [Source:UniProtKB/TrEMBL;Acc:Q174U3]			GO:0003735,GO:0005840,GO:0006412	structural constituent of ribosome,ribosome,translation
LOC110674019	0.57605	0.939669	0.50884	1.02492	1.64111	1.10056	1.34032	1.46247	1.42374	1.25627	1.06959	0.767252	AAEL025777
LOC110674020	22.7113	23.0378	29.8595	27.9305	27.4138	37.9758	25.3371	30.255	27.8775	26.4147	21.3695	24.2806	AAEL022573				GO:0003676	nucleic acid binding
LOC110674021	0.0347984	0.33644	1.05343	1.23939	0.759919	0.762115	0.598989	0.822788	0.865078	0.569173	0.258257	0.767552	AAEL027403
LOC110674022	0.839364	0.676688	0.495868	0.494695	0.772993	0.336501	0.591256	0.93994	0.384473	0.782184	0.551198	0.501581	AAEL024811
LOC110674023	1.3665	1.03411	0.958866	0.745298	0.264162	0.333303	0.927877	1.07979	1.12124	1.04113	1.1355	1.46068	AAEL020337
LOC110674024	0.0274625	0.254081	0	0	0.160964	0.0375563	0.0661141	0.119387	0.0528209	0.16334	0.508917	0.0242298	AAEL025948
LOC110674025	2.43827	3.00476	3.59922	2.85537	3.88093	4.53534	3.3383	3.57816	3.66724	3.94289	3.18419	2.60492	AAEL021538
LOC110674026	2.14465	4.9856	3.30222	2.87001	6.11547	3.53584	4.44787	4.95395	2.92548	4.54175	4.546	3.2466	AAEL027106
LOC110674027	4.25067	5.56195	5.29417	7.60974	9.26147	11.1049	6.21789	14.6267	8.77911	5.51788	2.20325	3.21454	AAEL022762
LOC110674028	14.5997	10.9689	18.8681	19.3031	18.7903	23.9692	15.0034	23.4056	23.5302	9.52264	7.51375	11.1212	AAEL026232
LOC110674029	0.0212141	0.0599229	0	0.128498	0.0112553	0.191551	0.011465	0	0.0618289	0.0472087	0.060406	0	AAEL024889
LOC110674030	10.5687	6.28036	22.2266	20.0184	5.37501	22.3856	7.32248	11.0971	10.0467	4.35314	8.5414	12.7542	AAEL021440
LOC110674031	0.0763421	0.0776943	0.11093	0	0	0.0675539	0	0.12169	0	0.318828	0.113315	0.168389	AAEL025031
LOC110674032	0.22989	0.116981	0.222698	0.22744	0.478122	0.203426	0	0	0	0	0.227485	0.405656	AAEL020285
LOC110674033	0	0	0	0	0	0	0	0	0	0	0	0	AAEL022097
LOC110674034	34.8937	38.2401	38.6818	44.3181	44.5142	54.7903	35.771	43.1917	37.1414	39.2353	37.2028	35.078	AAEL025611
LOC110674035	0	0	0	0	0	0.0297237	0	0	0	0	0	0	AAEL020857
LOC110674036	0	0	0	0	0	0	0	0.264008	0	0	0	0	AAEL024481
LOC110674037	3.21734	2.57268	2.4317	2.18616	1.69123	1.89277	2.99607	2.44212	2.63677	2.60227	2.69388	2.3707	AAEL013737	axonemal inner arm dynein light chain [Source:VB Community Annotation]
LOC110674038	5.02581	5.62224	6.58055	4.46579	5.13835	7.61825	4.38532	5.09479	4.35124	5.84915	5.58112	3.74295	AAEL023845				GO:0005509,GO:0005886,GO:0007155,GO:0007156,GO:0016020	calcium ion binding,plasma membrane,cell adhesion,homophilic cell adhesion via plasma membrane adhesion molecules,membrane
LOC110674039	0	0	0	0.540476	0	0	0	0	0.43343	0	0	0.361492	AAEL027303
LOC110674040	0	0.698724	0.443389	1.13208	1.4279	2.83513	0.159996	2.18877	0.242096	0.249547	0.45292	0.403829	AAEL025546
LOC110674042	0.254028	0.464978	0.196511	0.517108	0.570134	0.561694	0.58592	0.367052	0.391812	0.243784	0.426787	0.188115	AAEL026296
LOC110674043	0.136208	0.0184828	0.0290283	0.344079	0.188856	0.147045	0.0798356	0.0646525	0.232464	0.099016	0.0476234	0	AAEL022458
LOC110674044	0	0	0	0.0500391	0.0594332	0.0492313	0.0348243	0	0.00749063	0	0.022522	0.0647051	AAEL022099				GO:0003676	nucleic acid binding
LOC110674045	0.0222374	0	0.171894	0.25772	0.0604069	0.259824	0.0302855	0.0371345	0.104178	0.222192	0.0691578	0.142944	AAEL025186
LOC110674046	0.163966	0.0511574	0.197096	0.31023	0.833869	0.510467	0.413293	0.526542	0.343109	0.12659	0.323318	0.375918	AAEL020469
LOC110674047	0	0.0561711	0	0.191119	0.143488	0.0488399	0.11693	0.0780079	0	0.0198608	0.0546161	0.182612	AAEL027877
LOC110674048	0	0	0.0246819	0.89925	0.773839	1.11259	0.014668	0	0	0.00754967	0	0.240191	AAEL023189
LOC110674049	37.8206	28.8679	36.6373	39.1638	36.9696	42.9491	29.7796	31.2149	32.1405	28.1809	32.4349	27.5846	AAEL027326
LOC110674050	0.285519	0.112812	0.686586	0.0797582	0	0.0906573	0.220605	0.203465	0.15102	0.291191	0.0415488	0.248946	AAEL020988
LOC110674051	0.0409173	0	0.132124	0.165299	0.0602786	0.0422416	0.241995	0.612366	0.0721413	0.189622	0.215942	0	AAEL023727
LOC110674052	0	0	0	0	0	0	0	0	0	0	0	0	AAEL027283
LOC110674053	0	0	0	0.0178369	0.0247476	0.0159536	0	0	0	0	0	0	AAEL023823
LOC110674054	16.4148	10.6977	32.7362	9.55523	7.4856	26.332	12.0385	16.8568	14.444	21.0191	34.8307	10.8686	AAEL027261				GO:0005576,GO:0008061	extracellular region,chitin binding
LOC110674056	0.606755	0.535169	0.0783697	0.480232	1.13573	0.715878	0.856957	0.601796	0.51349	0.485186	0.520353	0.178444	AAEL026343				GO:0000166,GO:0003676,GO:0003779,GO:0003824,GO:0004386,GO:0005524,GO:0006310,GO:0044237	nucleotide binding,nucleic acid binding,actin binding,catalytic activity,helicase activity,ATP binding,DNA recombination,cellular metabolic process
LOC110674057	0.635954	0.791044	0.752959	0.559269	1.02873	1.06296	1.04789	1.35162	1.12125	0.924609	1.46837	0.997497	AAEL021924
LOC110674058	0.199108	0.337724	0.257171	0.0656621	0.138034	0.293645	0.632726	0.987401	0.491466	0.434222	0.262699	0.761235	AAEL025444
LOC110674059	0	0.0505925	0	0	0	0	0	0	0	0	0	0	AAEL020882
LOC110674060	0.107298	0.0545993	0.190212	0.0530774	0.111579	0	0.227315	0.171034	0.283766	0.1755	0.106176	0.331336	AAEL022292
LOC110674061	0.0141323	0.172592	0.162913	0.163586	0.0499667	0.0912898	0	0.0360432	0.02093	0	0	0.0137156	AAEL022791
LOC110674062	0	0.0849123	0.151545	0.169513	0.103806	0.0962425	0	0.0221658	0	0	0	0.0144597	AAEL026397
LOC110674063	1.66576	1.02927	2.65099	2.00116	1.54662	2.60583	1.29186	2.08625	1.85654	0.908188	0.824166	0.918546	AAEL023680				GO:0003676	nucleic acid binding
LOC110674064	0.776251	0.790001	0.977555	0.806379	0.726497	0.789926	0.863372	0.989879	0.944341	0.719474	0.76813	0.787606	AAEL027245				GO:0003677,GO:0005524,GO:0006281,GO:0008094	DNA binding,ATP binding,DNA repair,DNA-dependent ATPase activity
LOC110674065	1.18766	1.4773	2.42885	1.56668	2.33286	2.56898	0.838705	1.2621	1.25638	2.01453	3.00339	1.16429	AAEL020967
LOC110674066	0.356531	0	0	0	0	0.157744	0	0	0	0	0	0	AAEL024630				GO:0005179,GO:0005184,GO:0005576,GO:0007218,GO:0032539	hormone activity,neuropeptide hormone activity,extracellular region,neuropeptide signaling pathway,negative regulation of host-seeking behavior
LOC110674067	5.07094	4.44217	4.78793	4.82639	4.53899	4.43039	3.87563	5.1841	4.4816	3.49965	4.31919	2.66175	AAEL021868				GO:0003676,GO:0005634,GO:0008270	nucleic acid binding,nucleus,zinc ion binding
LOC110674068	0.126856	0.129102	0.0614434	0.0627519	0.0659581	0.224505	0.0671871	0	0	0	0	0	AAEL025554
LOC110674069	0.76895	0.698724	0.474767	0.599828	0.489881	0.319654	0.492296	0.693672	0.277107	0.68184	0.487063	0.382085	AAEL026226
LOC110674070	0.0522961	0.159667	0	0.206955	0.217529	0.138828	0.0553957	0.111147	0	0.171074	0.0517489	0.04614	AAEL025824
LOC110674071	0	0.175869	0.167402	1.11129	0.628958	1.29978	0.549152	0.550915	0.0914036	0.659517	0.513001	0.381165	AAEL020100
LOC110674072	0.0894728	0	0	0.059013	0.015507	0.0395865	0	0	0.0630999	0.0162605	0.0295122	0.0263135	AAEL024682				GO:0003676	nucleic acid binding
LOC110674073	2.83406	2.22768	3.16948	2.32515	2.55561	2.75248	2.02576	1.95881	2.29118	2.13558	2.66761	1.60598	AAEL021869				GO:0016020,GO:0016021	membrane,integral component of membrane
LOC110674074	0.110768	0.325414	0.339792	0.0730586	0.0253411	0.0816808	0.123591	0.156947	0.149987	0.0805225	0.206796	0	AAEL024414
LOC110674075	1.2749	0.764932	1.15575	0.203316	0	0.606163	0.77198	0.0909938	0.11675	0.213713	0.39918	1.49081	AAEL020684
LOC110674076	0.152417	0.116094	0.0185721	0.163122	0.114636	0.095852	0.0436628	0.124278	0.172391	0.0501731	0.0626055	0.044825	AAEL023319
LOC110674077	0.0780137	0.189303	0.0630816	0.0341261	0.0234662	0.0342313	0.0689785	0.0606356	0.0716149	0.213372	0.140997	0.0489207	AAEL027665
LOC110674078	0.661963	0.673688	0.961879	1.14609	1.72093	0.58576	2.45419	0.87931	0.875331	1.80454	1.14632	0.58404	AAEL024181
LOC110674079	0	0.0143265	0	0.0443136	0.0612164	0.0237808	0	0	0	0.0139545	0.0316588	0	AAEL026464
LOC110674080	0	0.0747008	0.0428339	0.0997412	0.0183925	0	0	0	0.233879	0	0.119888	0.0780244	AAEL023254
LOC110674081	0	0	0	0	0	0.041627	0	0	0	0	0	0	AAEL025093
LOC110674082	0.361178	0	0	0.357329	0.250391	0.3196	0.255056	0.255875	0.127359	0	0.119133	0.10622	AAEL023377
LOC110674083	0.351406	0	0.992526	0.699512	0.365424	0.498275	0.201813	0.188964	0	0.38318	0.209475	0	AAEL027744
LOC110674084	0.329313	0.484099	0.354456	0.289603	0.49465	0.420916	0.426349	0.427718	0.30966	0.239393	0.470697	0.225981	AAEL022176
LOC110674085	0.149759	0.26672	0.326415	0.382754	0.194666	0.408601	0.158635	0.238716	0.105616	0.435466	0.296384	0.0660649	AAEL021443
LOC110674086	2.32144	12.9202	10.0025	9.21074	25.599	7.59628	14.1138	1.02788	2.5325	28.3194	16.8697	7.2326	AAEL026128
LOC110674087	0.852682	0.433893	0.963673	0.140599	0.738915	0.628771	0.602147	0.60408	0.45101	0	0.843761	0.501539	AAEL019991
LOC110674088	0.503026	0.929448	1.0742	1.53945	1.65646	1.43428	1.19356	0.94081	0.873879	0.975128	0.872745	0.855078	AAEL025032
LOC110674089	0	0	0	0	0	0	0	0	0	0	0	0	AAEL020531
LOC110674090	0.0900809	0.0611177	0.0872627	0	0.0468373	0.0531408	0.0636133	0.0638176	0.0952931	0.032742	0.118851	0.0264923	AAEL027785
LOC110674091	0.16786	0	0.0542028	0.110714	0.0581855	0.198049	0.118539	0.11892	0	0.0610126	0.221472	0	AAEL025490
LOC110674092	0	0.0405066	0	0	0	0.0517939	0	0	0	0	0	0	AAEL020931
LOC110674093	0.0514435	0.0557054	0.00996682	0.105048	0.0783179	0.0848522	0.0108985	0.021867	0.0653041	0.044876	0.0101811	0.0846029	AAEL026385				GO:0006508,GO:0008234	proteolysis,cysteine-type peptidase activity
LOC110674094	0	0	0	0	0	0	0	0	0	0	0	0	AAEL021320
LOC110674096	0.385805	2.20859	0.700752	2.19474	1.95583	9.51631	1.2771	0.358735	0.459144	16.775	38.9881	0.553133	AAEL022804
LOC110674097	0.546749	1.02726	1.30374	9.52858	0.349884	185.746	0	0.0446934	0.133473	82.6406	372.353	2.26352	AAEL027763				GO:0004462,GO:0016829,GO:0046872	lactoylglutathione lyase activity,lyase activity,metal ion binding
LOC110674098	4.89307	5.25898	7.35363	26.512	6.75266	319.353	7.07225	4.325	5.17619	594.285	1388.99	12.3057	AAEL023292
LOC110674099	0.711062	0.809832	0.782411	0.183658	0.146757	0.417871	0.409376	1.30475	0.879677	0.51138	0.467291	1.05933	AAEL020961
LOC110674100	0.714881	0.814182	0.786613	0.184644	0.147545	0.516693	0.411575	1.31176	0.884402	0.514126	0.469801	1.06502	AAEL022576
LOC110674101	0.345225	0.468453	0.445899	0	0	0.25457	0.670425	0.917152	0.243467	0.56466	0.341613	0.710703	AAEL028076
LOC110674102	0.970823	0.989201	0.937076	0.227482	0.584478	0.541541	0.948407	0.757706	0.90415	0.930711	0.756122	0.580932	AAEL023447
LOC110674103	0.89003	0.856218	2.06636	0.582306	0.523855	0.712518	0.627105	0.826441	0.76753	0.865519	0.851796	1.58973	AAEL020072
LOC110674104	0	0.0105414	0	0.0333046	0.075398	0.0490358	0	0.0247659	0	0	0	0.0150788	AAEL027889
LOC110674105	1.04505	0.818126	1.84249	0.318129	0.919552	0.640212	1.98748	1.70853	0.651407	0.613602	0.76843	0.99296	AAEL021292
LOC110674106	0	0.184005	0.555214	0.178877	0.188016	0.15999	0.574557	0.384268	0.191264	0.197151	0.178911	0.15952	AAEL024738
LOC110674107	0.196414	0	0.0634229	0.194321	0.136166	0.173803	0.277407	0.347871	0.207778	0.356955	0.129572	0	AAEL022476
LOC110674108	0.173434	0.205475	0.142358	0.519343	0.159702	0.451036	0.47471	0.210331	0.222684	0.137867	0.129042	0.497018	AAEL021305
LOC110674109	0	0	0	0	0	0	0	0	0	0	0	0	AAEL023626				GO:0004984,GO:0005549,GO:0007608,GO:0016020	olfactory receptor activity,odorant binding,sensory perception of smell,membrane
LOC110674110	0	0	0.0186682	0	0.218617	0.155025	0	0	0	0.191033	0	0	AAEL027292
LOC110674111	0	0	0	0	0	0	0	0	0	0	0	0.117961	AAEL018080				GO:0004984,GO:0005549,GO:0007608,GO:0016020	olfactory receptor activity,odorant binding,sensory perception of smell,membrane
LOC110674112	0	0	0	0	0	0	0	0	0	0	0	0	AAEL026419
LOC110674113	0.244171	0.269615	0.326321	0.354485	0.333035	0.294409	0.240326	0.480725	0.434645	0.337903	0.27584	0.1959	AAEL025310
LOC110674114	0.588276	0.883893	0.352284	1.36719	0.818625	0.899142	0.498514	0.759265	0.737725	0.289244	0.96738	0.426546	AAEL021779
LOC110674115	0.561044	0.582613	0.558588	0.507783	0.894586	0.74285	0.638319	0.841311	0.79354	0.474691	0.397875	0.540834	AAEL024316
LOC110674116	3.3025	4.41434	2.53711	2.37684	2.15698	1.92839	3.29576	3.01896	2.61088	3.29247	2.39029	2.73745	AAEL020380
LOC110674117	33.1614	15.3715	50.454	20.136	15.5044	26.763	17.3446	17.867	19.6883	22.023	21.1575	32.6899	AAEL027598
LOC110674118	1.23916	0.980864	1.33377	1.77083	0.429532	3.41138	1.16676	0.731567	1.60216	2.40214	1.08995	2.06511	AAEL024176
LOC110674119	95.0991	77.6372	62.5341	55.2243	52.9937	61.9247	46.3165	48.8269	47.5671	43.7898	53.445	50.4795	AAEL026582				GO:0005506,GO:0016705,GO:0020037,GO:0055114	iron ion binding,oxidoreductase activity, acting on paired donors, with incorporation or reduction of molecular oxygen,heme binding,oxidation-reduction process
LOC110674120	2.7489	3.43038	2.28249	4.6622	3.98158	2.43246	4.88772	3.12984	3.49647	3.24725	6.63845	6.78511	AAEL024267
LOC110674121	0	0	0	0	0	0	0	0	0	0	0	0	AAEL024095
LOC110674122	13.1415	9.49949	8.01101	11.0978	13.4529	8.47701	12.099	10.0061	10.7837	12.5888	11.4241	27.6319	AAEL027536	Putative alpha amylase catalytic domain family found in maltase [Source:UniProtKB/TrEMBL;Acc:A0A0P6IY06]			GO:0016020,GO:0016021	membrane,integral component of membrane
LOC110674123	0.628211	0.275378	1.53056	0.299527	0.407312	0.318132	0.290631	0.452427	0.322272	0.0412659	0.112344	0.0333892	AAEL026429
LOC110674124	0.0478171	0.048664	0.0463211	0.0473076	0	0.0423126	0	0.0508138	0	0.0521407	0	0.0421883	AAEL024026
LOC110674125	0.250175	0.113829	0.312793	0.153276	0.110556	0.289572	0.125594	0.118857	0.128771	0.215478	0.0891676	0.124834	AAEL021715				GO:0003676	nucleic acid binding
LOC110674126	0.814394	1.02008	0.788915	1.05363	1.36804	0.443473	0.862663	0.998576	0.795245	0.956341	0.557912	0.607984	AAEL025386
LOC110674127	0.855536	0.539847	0.642291	0.166998	0.0806423	0.160644	0.123407	0.2252	0.251147	0.161717	0.367184	0.0387818	AAEL024231				GO:0005515	protein binding
LOC110674128	0.277861	0.184578	0.255654	0.334712	0.401382	0.239703	0.247533	0.446001	0.336984	0.266222	0.23699	0.23387	AAEL021820
LOC110674129	0.259734	0.16037	0.215814	0.290297	0.349203	0.18656	0.211814	0.377639	0.257518	0.229893	0.210775	0.218612	AAEL027387
LOC110674130	0.188402	0	0.121672	0.124263	0	0.222285	0	0.133473	0.265737	0.136958	0.372861	0.443264	AAEL026136
LOC110674131	2.7505	1.22253	1.7725	0.0986295	0.119123	0.164377	0.167255	0.711966	0.355682	0.214711	0.969944	0.064465	AAEL021310				GO:0005515	protein binding
LOC110674132	0.763306	0.645201	0.562849	0.613107	0.317137	0.684773	0.0943684	0.0998617	0.0799824	0.260114	0.353784	0.113592	AAEL024749				GO:0005515	protein binding
LOC110674133	14.8717	77.4207	60.5754	34.6509	444.741	47.9899	71.6516	5.75652	9.94732	21.3248	14.361	288.689	AAEL020011				GO:0042302	structural constituent of cuticle
LOC110674134	0.0532554	0.115172	0.0322433	0.0724459	0.11076	0.10014	0.0423089	0.0424447	0.0845052	0.0362942	0.0461109	0.0234932	AAEL023884				GO:0003777,GO:0005524,GO:0007018,GO:0030286	microtubule motor activity,ATP binding,microtubule-based movement,dynein complex
LOC110674135	0.485071	0.496889	0.296372	0.0643007	0.0181328	0.0799549	0.186386	0.247628	0.0335384	0.172853	0.170979	0.0951046	AAEL027187
LOC110674136	0	0	0	0	0	0	0	0	0	0	0	0	AAEL022482
LOC110674137	0	0	0	0	0	0	0	0	0	0	0	0	AAEL023061
LOC110674138	0	0	0	0	0	0	0	0	0	0	0	0	AAEL026625
LOC110674139	0.045889	0.0366943	0.0349276	0.0518857	0.0193151	0.0164359	0.019675	0.0197382	0	0.0202536	0	0.0298834	AAEL025745
LOC110674140	0.023991	0.0431975	0.0214527	0.00912901	0.00767635	0	0	0.015689	0.015618	0	0.0146093	0.0065129	AAEL022317				GO:0003676,GO:0003677	nucleic acid binding,DNA binding
LOC110674141	0.023991	0.0431975	0.0214527	0.00912901	0.00767635	0	0	0.015689	0.015618	0	0.0146093	0.0065129	AAEL026643				GO:0003676,GO:0003677	nucleic acid binding,DNA binding
LOC110674142	13.7719	15.3114	15.9196	10.4193	10.1092	11.8793	12.1364	9.59269	13.5894	15.1434	14.544	7.86225	AAEL021882
LOC110674143	0.0661532	0	0	0	0	0.038635	0	0	0	0	0	0	AAEL020899				GO:0003676,GO:0003677	nucleic acid binding,DNA binding
LOC110674144	0	0	0	0	0	0.141375	0	0	0	0	0	0	AAEL024473
LOC110674146	4.95867	4.51084	3.83746	6.98877	6.97135	7.01076	5.66339	6.94741	5.71447	4.56124	4.13925	5.35261	AAEL023247				GO:0003676,GO:0005634,GO:0008270	nucleic acid binding,nucleus,zinc ion binding
LOC110674147	1.33605	1.7767	1.31151	2.11491	1.94509	2.85317	2.33986	1.77946	1.54527	1.12664	1.69226	1.35167	AAEL023943				GO:0007165	signal transduction
LOC110674148	3.67319	2.67534	2.10267	2.76431	2.53558	2.43746	14.8832	15.5964	14.9546	4.66952	9.86857	8.74584	AAEL027610				GO:0000166,GO:0005524	nucleotide binding,ATP binding
LOC110674150	2.57167	2.32319	1.50113	1.22371	1.17268	1.87332	12.4376	11.5362	11.6549	2.71336	5.55474	5.24985	AAEL017975	heat shock protein HSP70 [Source:VB Community Annotation]	HSP70Ba
LOC110674151	3.48968	2.90341	2.42298	2.35185	1.2019	1.44052	16.4797	13.1282	13.0655	4.71662	6.44533	7.72085	AAEL017976	heat shock protein HSP70 [Source:VB Community Annotation]	HSP70Bb
LOC110674152	1.0189	0.575817	0.517994	1.17826	0.776451	0.672202	4.20906	3.78593	3.58138	1.33859	1.97746	1.9178	AAEL020330				GO:0000166,GO:0005524	nucleotide binding,ATP binding
LOC110674153	0.382166	0.652039	0.48258	0.21885	0.190758	0.228764	0.591509	0.397995	0.570747	0.310335	0.25582	0.575189	AAEL023321				GO:0000166,GO:0005524	nucleotide binding,ATP binding
LOC110674154	3.51229	3.86545	2.70293	2.94959	1.94002	3.99988	3.44705	4.45632	5.7167	3.32575	3.03099	4.81689	AAEL026868
LOC110674155	0.136661	0.158716	0.269443	0.943251	0.81255	0.754028	0.364456	0.490349	0.506839	0.713531	0.474104	0.517758	AAEL022344
LOC110674156	0	0.0501309	0	0.0624789	0.153014	0.0793525	0.0889701	0.0671096	0	0	0.0124982	0	AAEL021864
LOC110674157	0.387091	0.492434	0.796833	0.670191	0.201266	0.685061	0.153763	0.462768	0.307116	0.474853	0.383041	0.554977	AAEL021403
LOC110674158	0.472904	0.673792	0.51919	0.45227	0.352435	0.571902	0.434142	0.201016	0.400213	0.144386	0.53035	0.250342	AAEL025185
LOC110674159	1.94886	1.10188	2.72695	1.92809	2.19549	2.10774	1.3189	2.3011	1.48895	1.12157	1.76776	1.71945	AAEL023718				GO:0005515	protein binding
LOC110674160	168.022	115.734	165.889	177.841	186.52	193.29	175.444	225.715	222.709	170.392	178.975	168.547	AAEL022282				GO:0003676,GO:0003723,GO:0006355	nucleic acid binding,RNA binding,regulation of transcription, DNA-templated
LOC110674161	0.313615	0.790791	0.643348	0.584044	0.511826	0.22854	0.625323	0.682222	0.54643	0.60348	0.547648	0.423185	AAEL026934
LOC110674162	0.875121	0.98958	2.49613	1.1063	2.07285	2.02199	0.514994	1.44661	1.85151	0.636166	1.01029	1.20105	AAEL023183
LOC110674163	163.469	143.707	151.577	171.009	173.793	166.602	185.453	221.873	226.42	172.527	190.396	188.419	AAEL022901	Huntingtin-interacting protein HYPK (Fragment) [Source:UniProtKB/TrEMBL;Acc:Q1HRA7]
LOC110674164	30.1406	23.8379	34.9036	32.3921	32.101	36.7815	23.3297	28.6591	27.675	29.3645	27.525	23.916	AAEL011982	cortactin [Source:VB Community Annotation]			GO:0005515	protein binding
LOC110674165	0.759237	0.901466	0.429032	0.375574	0.85532	0.671837	0.670198	0.40341	0.267723	1.03486	0.563471	0.390754	AAEL023821
LOC110674166	113.092	93.9821	131.698	162.898	123.677	150.6	126.088	155.602	161.928	167.022	162.83	113.373	AAEL020485	Signal peptidase complex catalytic subunit SEC11 [Source:UniProtKB/TrEMBL;Acc:Q1HRM6]			GO:0004252,GO:0005783,GO:0005787,GO:0005789,GO:0006465,GO:0006508,GO:0008233,GO:0008236,GO:0016020,GO:0016021,GO:0016787,GO:0031090	serine-type endopeptidase activity,endoplasmic reticulum,signal peptidase complex,endoplasmic reticulum membrane,signal peptide processing,proteolysis,peptidase activity,serine-type peptidase activity,membrane,integral component of membrane,hydrolase activity,organelle membrane
LOC110674167	0.144967	0.0232231	0.0754171	0.0663993	0.139584	0.0593885	0.0284369	0	0.0283991	0.0292732	0	0.108954	AAEL020786
LOC110674168	0.476695	0.46918	0.167092	0.425075	0.280469	0.296939	0.601287	0.279946	0.262091	0.646327	0.344471	0.273931	AAEL025632
LOC110674169	0.456457	0.486759	0.403726	0.382873	0.204313	0.456596	0.380502	0.434448	0.323312	0.575635	0.418296	0.2679	AAEL022246
LOC110674170	0.647053	0.931675	0.403944	0.734997	0.603087	0.699804	0.969719	0.804751	0.512101	1.25433	0.962796	0.604715	AAEL022744
LOC110674171	1.98968	1.75682	1.61835	3.19231	1.64538	3.59802	1.2306	1.13196	1.69112	0.909943	1.48798	0.845973	AAEL026980
LOC110674172	0	0	0.0880101	0	0	0	0.0303907	0.0635172	0.0252919	0.0625688	0	0	AAEL021561
LOC110674173	0.197463	0.209334	0	1.00122	0.267371	0.591541	0.871528	0.109291	0.380787	0.859028	0.407078	0.272217	AAEL020325
LOC110674174	14.8825	21.2176	12.8633	9.26589	19.4786	9.47959	10.94	7.70307	7.3289	9.58299	10.7912	18.6205	AAEL024982
LOC110674175	6.42077	4.6675	4.93642	5.44488	6.35897	6.85404	5.93767	7.90621	7.54698	5.66775	5.04254	4.58591	AAEL027264				GO:0004497,GO:0005506,GO:0016705,GO:0020037,GO:0055114	monooxygenase activity,iron ion binding,oxidoreductase activity, acting on paired donors, with incorporation or reduction of molecular oxygen,heme binding,oxidation-reduction process
LOC110674176	0.262762	0.225852	0.0586304	0.866542	0.660598	0.66837	0.395091	0.230077	0.132737	3.11632	0.725992	0.697664	AAEL023837
LOC110674177	4.90761	3.80641	4.43993	3.25114	3.82192	4.68702	3.38932	3.99753	3.86509	3.55971	2.97366	4.19639	AAEL019557				GO:0003676	nucleic acid binding
LOC110674178	0	0	0.0594757	0	0.0638459	0	0	0.130489	0	0.066948	0	0	AAEL028179
LOC110674179	0.00464852	0.0556572	0.0177475	0	0.0284351	0	0	0.0339978	0	0.0149084	0.00784687	0	AAEL018094				GO:0016020,GO:0016021	membrane,integral component of membrane
LOC110674180	0.338704	0.344704	0	0	0	0	0	0	0.358302	0	0	0	AAEL020982
LOC110674181	3.84659	1.95692	4.76896	2.58393	2.85027	4.01338	2.03683	4.0721	3.78039	3.27045	3.76374	3.45305	AAEL024365
LOC110674182	0.172287	0.0779285	0.117941	0	0.0111478	0.0677575	0.0202776	0.081371	0.162005	0.222934	0.0697094	0.168896	AAEL021692
LOC110674183	0	0.0306334	0	0	0.0948518	0.0266353	0	0	0.0482453	0.0994604	0.0902587	0	AAEL022863
LOC110674184	0	0	0.0361219	0	0	0	0.0329155	0	0	0	0	0.0548319	AAEL026988
LOC110674185	0	0	0.0361219	0	0	0	0.0329155	0	0	0	0	0.0548319	AAEL023737
LOC110674186	0	0	0.0361219	0	0	0	0.0329155	0	0	0	0	0.0548319	AAEL027308
LOC110674187	0.0239302	0.0430879	0.0213983	0.00910585	0.00765688	0	0	0.0156492	0.0155783	0	0.0145722	0.00649638	AAEL027742				GO:0003676,GO:0003677	nucleic acid binding,DNA binding
LOC110674188	0.867837	0.928071	1.96476	0.52511	0.527398	0.597721	0.625898	0.79494	0.750362	0.761803	0.827914	1.52468	AAEL023263
LOC110674189	0.242708	0.280187	0.493039	0.281337	0.195885	0.286892	0.132384	0.152056	0.0843064	0.280454	0.125461	0.242902	AAEL020874
LOC110674190	2.26895	1.45951	2.38023	2.35828	2.40599	3.25986	0.931719	1.07695	1.33504	1.16762	1.61778	0.618474	AAEL005073
LOC110674191	0.188169	0.383004	0	0.558492	0.391352	0.832539	0.597965	0.599885	0.59717	0.410366	0.558601	0	AAEL023722
LOC110674192	2.95216	3.00445	4.05906	2.70871	2.74808	3.96061	2.44622	3.28897	3.27408	3.08929	2.82703	2.58364	AAEL019663				GO:0003676	nucleic acid binding
LOC110674193	0.160777	0.245438	0.233621	0.688748	0.529996	0.569077	0.25546	0.25628	0.0561264	0	0.211597	0.0709257	AAEL022831
LOC110674194	0	0	0	0.0134217	0	0.0666254	0	0	0	0	0.0134243	0.0299233	AAEL026230
LOC110674195	0	0.0634424	0	0.0431718	0.0388951	0	0	0	0	0	0	0	AAEL023455
LOC110674196	0.0251825	0.106358	0.0146368	0.118342	0.0484461	0.124788	0.0146713	0.103029	0.0932384	0	0.0809868	0.0555453	AAEL027427
LOC110674197	0.0561793	0.0601574	0.0662525	0.0976287	0.127001	0.110664	0.016559	0.095001	0.0744166	0.0399515	0.108766	0.0349118	AAEL024626
LOC110674198	0.257635	0	0.19966	0.544445	0.428661	0.9265	0	0	0.0545084	0.337116	0	0.150932	AAEL024046
LOC110674199	1.39116	1.21867	1.31892	1.04578	1.0772	1.31437	1.47623	1.83977	1.61348	1.63467	1.63984	1.39611	AAEL025256
LOC110674200	0.0631126	0	0	0.0312201	0.240207	0.270301	0	0	0.133529	0	0.0624523	0.0556833	AAEL024158
LOC110674201	0	0	0	0.199858	0.630208	0	0.427967	0.429341	0	0.660829	0.199897	0.534692	AAEL026442
LOC110674202	0.380282	0.696632	0.294708	0.300984	0.237271	0	0.241693	0.0808228	0.160914	0.165867	0.0752606	0	AAEL024599
LOC110674203	0.420576	0.770447	0.244451	0.332876	0.0874709	0	0.267302	0.0893868	0.177965	0.183442	0	0	AAEL021873
LOC110674204	0.710568	0	0	0	0	0	0	0	0	0	0	0.626924	AAEL022728
LOC110674205	8.24042	8.33267	9.21229	7.73498	7.75833	9.89103	9.71312	10.1712	10.8881	9.02387	9.6975	10.2499	AAEL027099
LOC110674206	0.107579	0.117383	0.207908	0.127613	0.0756936	0.132373	0.10942	0.106358	0.0713396	0.0598203	0.0624951	0.0179442	AAEL023888				GO:0046983	protein dimerization activity
LOC110674207	2.19042	1.54807	0.412591	1.9263	2.34108	2.369	1.80464	2.13372	1.60914	2.12309	1.32459	0.644192	AAEL027211
LOC110674208	2.05969	2.79489	2.79335	3.12454	4.4265	4.00969	2.32722	3.79387	2.68727	3.21916	1.90226	4.11906	AAEL004645
LOC110674209	2.1343	1.22771	2.65183	1.74433	2.26769	2.38129	2.60484	2.36667	2.25779	1.87195	2.43336	1.59651	AAEL024517
LOC110674210	0	1.348	1.2831	0.561612	1.18061	0.334876	0.601306	1.80971	0.600506	0.206329	0.187241	0.834731	AAEL026521
LOC110674211	0.0382782	0	0	0	0	0	0	0	0	0	0	0	AAEL022971
LOC110674212	0.260041	1.11978	0.473232	0.710838	0.403277	0.565289	0.597081	0.643723	0.782328	0.434345	1.31189	0.762556	AAEL025419
LOC110674213	0.018601	0	0.0201706	0.105198	0.115481	0.137082	0	0	0.00734225	0.0175583	0	0	AAEL021783
LOC110674214	0.399415	0.365841	0.464303	0.513708	0.456884	0.600842	0.169235	0.212223	0.126758	0.130659	0.454522	0.281918	AAEL024306
LOC110674215	6.64839	5.85727	3.26826	1.37441	4.4371	2.10736	11.5622	3.79615	3.46405	2.81325	2.55298	9.10509	AAEL020470				GO:0004252,GO:0006508,GO:0008233,GO:0008236,GO:0016787	serine-type endopeptidase activity,proteolysis,peptidase activity,serine-type peptidase activity,hydrolase activity
LOC110674216	0.372657	0.252839	0.240666	0.245791	0.516699	0	0.131582	0.792024	0	0.135451	0.12292	0.547983	AAEL025097
LOC110674217	0.0849593	0	0	0.042027	0	0.0375896	0.0148491	0.0902837	0.0449375	0	0	0.0374791	AAEL020511
LOC110674218	0.0538195	0	0.0521358	0.532461	0.1679	0.476241	0.266804	0.40721	0.266449	0.117372	0	0.0949683	AAEL023250
LOC110674219	0	0	0	0.167725	0	0.0161409	0	0	0	0	0.0350379	0.0946675	AAEL026807
LOC110674220	0.138624	0.846475	0.402861	0.137147	0.72077	0.245332	0.14684	0	0.0733224	0	0.274347	0.366917	AAEL020368
LOC110674221	28.931	25.0149	24.6081	27.5756	11.7405	30.5958	9.84151	13.4974	15.7379	22.5702	20.5984	15.0454	AAEL025109
LOC110674222	0	0	0	0	0	0	0	0	0	0	0	0	AAEL023211				GO:0006629,GO:0016788	lipid metabolic process,hydrolase activity, acting on ester bonds
LOC110674223	0.075341	0.229018	0.0105635	0.0980767	0.198959	0.0877212	0.350729	0.221226	0.0859925	0.0443196	0.0725909	0.147813	AAEL027863
LOC110674224	0	0	0.160313	0.0327455	0	0.0732201	0.175299	0	0.189071	0.0360909	0	0.0481833	AAEL022288
LOC110674225	4.79412	7.7635	4.8778	4.35525	5.5184	5.09603	6.03643	4.96641	4.59307	4.43853	4.86331	3.88395	AAEL026960
LOC110674226	0.0160018	0	0	0.0158313	0	0	0	0	0	0.052346	0.0329883	0	AAEL024501
LOC110674227	0.862237	0.229502	0.809561	1.74153	1.31047	1.56117	1.51755	1.25459	1.11279	0.993719	1.36121	1.09195	AAEL020782
LOC110674228	0.302144	0.0231675	0.200473	0.104419	0.374454	0.283843	0.49323	0.123154	0.243003	0.22566	0.341987	0.573322	AAEL024918
LOC110674229	56.4547	80.8513	53.9611	53.5539	80.6429	54.7015	69.5719	55.8894	55.7499	63.6256	59.2251	62.7109	AAEL023323
LOC110674230	0.135121	0.343787	0.130894	0.401045	0.421536	0.3587	0.214695	0.430769	0.214409	0.589356	0.133708	0	AAEL026257				GO:0005515	protein binding
LOC110674231	0.0187853	0.019118	0	0.094052	0.0787307	0.0841214	0	0	0.0198722	0	0	0	AAEL022721				GO:0008270	zinc ion binding
LOC110674232	0.119828	0.0642714	0.041569	0.113746	0.145658	0.119647	0.021441	0.0456008	0.0770849	0.0865203	0.026439	0.0635765	AAEL024405
LOC110674233	1.78356	0.429243	1.51594	3.81118	2.66503	3.49983	1.53673	1.49781	1.19453	2.4807	2.65	1.88899	AAEL020626
LOC110674234	0.0379318	0.116981	0.133619	1.02348	1.73319	1.71183	0	0.0610743	0.364787	0.0802164	0.357151	0.349879	AAEL025079
LOC110674235	0.0760356	0.0281391	0.0736568	2.59186	1.93599	4.23881	2.31376	0.825148	1.86951	0	0	1.27462	AAEL021803
LOC110674236	3.83805	2.78913	4.06219	3.07888	4.36466	3.18978	3.19812	3.80374	3.10537	3.45619	4.028	2.76128	AAEL026186
LOC110674237	1.28622	0.561	2.66995	1.63609	0.573227	1.78853	0.778544	0	0.971886	0	0.181823	0.810579	AAEL026466
LOC110674238	3.00964	2.1149	2.91548	2.48131	2.08647	2.79	2.50488	2.58907	2.27413	3.7506	2.97816	2.90825	AAEL022787
LOC110674239	0.706667	0.378518	0.972794	0.515154	0.773535	1.18481	0.433372	0.71143	0.747555	0.527228	0.47845	0.360963	AAEL027705
LOC110674240	3.57546	3.22293	3.59555	3.94164	3.57646	3.73638	2.81348	3.72717	3.09792	2.59917	3.50436	3.39493	AAEL025375				GO:0003824	catalytic activity
LOC110674241	8.63624	8.60533	11.4464	8.22247	8.00378	10.6797	7.73187	9.36947	6.49837	11.2296	10.9058	8.22536	AAEL020542				GO:0046872	metal ion binding
LOC110674242	0	0	0	0	0	0	0.0419848	0	0.0635287	0.032742	0	0	AAEL024400
LOC110674243	0	0	0	0.0238785	0	0	0.0281228	0.0282131	0	0	0.0238832	0.0255535	AAEL023752
LOC110674244	0.176126	0.193034	0.231863	0.0893588	0.962725	2.39771	0.200916	0.201561	0.66883	0.704189	0.259191	0.199222	AAEL027565
LOC110674245	0	0	0	0	0	0	0	0	0	0	0.209913	0	AAEL022811
LOC110674246	0.102534	0.10435	0	0.507208	0.106625	0.0907308	0.434445	0.21792	0.108467	0	0.101461	0.180929	AAEL022117
LOC110674247	0.189928	0	0	0.187904	0.197504	0.168064	0	0	0	0	0	0.16757	AAEL025500
LOC110674248	0.168789	0.257669	0.654035	0	0	0.0746796	0	0.71747	0.178556	0.64418	0.167024	0.223381	AAEL020920
LOC110674249	1.18921	0.806848	1.152	2.4838	1.23665	1.9877	2.23945	0.982907	2.65581	1.00857	2.09203	3.73056	AAEL024702
LOC110674250	0	0	0	0	0	0	0.0562056	0.0563861	0	0	0.0525056	0	AAEL020427				GO:0003677,GO:0006355,GO:0043565	DNA binding,regulation of transcription, DNA-templated,sequence-specific DNA binding
LOC110674251	10.8869	9.99351	6.41051	6.12464	5.10566	6.61134	4.74855	3.17586	2.93567	4.42265	6.54831	6.59192	AAEL025792
LOC110674252	3.2054	2.93596	4.96819	2.21987	1.99997	3.12005	3.05585	2.3844	0.678174	2.44666	0.95156	1.69685	AAEL026823
LOC110674253	2.74625	2.56199	1.10847	2.49057	2.61782	1.21506	3.15144	2.91836	2.90515	2.74502	1.1323	1.00957	AAEL022319
LOC110674254	0.0599477	0	0	0.0504126	0.623392	0	0.0635007	0	0	0.107857	0.854215	0.08727	AAEL027894
LOC110674255	0	0	0	0.183112	0	0	0	0.196684	0	0	0	0	AAEL024045
LOC110674256	0	0	0	0	0	0	0	0	0	0	0	0	AAEL028216
LOC110674257	1.02444	1.18725	0.545412	1.46398	1.97934	1.69068	0.673446	1.64506	1.5266	1.37439	1.21977	1.01995	AAEL023571				GO:0003676,GO:0015074	nucleic acid binding,DNA integration
LOC110674258	0.560794	0.470823	0.18513	0.56825	0.500632	0.723565	0.0365048	0.258573	0.12594	0.167394	0.194276	0.322482	AAEL025154
LOC110674259	0	0	0.0773397	0.0789868	0.145918	0.404614	0.235769	0.0848409	0.0639825	0.102885	0.0598501	0.345793	AAEL020142				GO:0003676,GO:0008270	nucleic acid binding,zinc ion binding
LOC110674260	0.0378889	0	0	0	0	0	0	0	0	0	0	0	AAEL027158
LOC110674261	0	0	0	0	0	0	0	0	0	0	0	0	AAEL022652
LOC110674262	0.0417244	0.144875	0	0	0	0.0651552	0.0649962	0.127802	0.0856809	0.0936706	0	0.080122	AAEL026677
LOC110674263	197.96	204.737	111.119	107.426	135.058	103.129	183.936	197.091	185.672	177.198	214.523	185.102	AAEL023991
LOC110674264	0	0	0	0	0	0	0.0727255	0	0	0	0	0	AAEL027595				GO:0003924,GO:0005525,GO:0007165,GO:0016020	GTPase activity,GTP binding,signal transduction,membrane
LOC110674265	0.145758	0	0.0457116	0	0.0272613	0.0417558	0.0222154	0.0445735	0.122022	0.0228687	0.0757484	0.0185036	AAEL024879
LOC110674266	15.5577	17.9418	19.1067	14.0573	13.4899	16.4444	14.3332	15.2611	14.78	20.11	17.8641	16.2715	AAEL020748				GO:0005576,GO:0008061	extracellular region,chitin binding
LOC110674271	0.277626	0.470907	0.0896469	0.122685	0	0	0.162725	0.261589	0.358302	0.16751	0.580579	0.408243	AAEL023965				GO:0005634,GO:0008270	nucleus,zinc ion binding
LOC110674272	0.233867	0.0229802	1.03745	0.43722	0.251583	1.94386	0.0341694	0.200533	0.139908	0.444954	1.37256	0.105303	AAEL028174				GO:0046983	protein dimerization activity
LOC110674273	0.449607	0.202857	1.4881	0.692432	0.377152	2.09932	0.449268	0.186336	0.158541	0.16342	0.222452	0.175862	AAEL024693				GO:0080019	fatty-acyl-CoA reductase (alcohol-forming) activity
LOC110674274	0	0.155622	0.0740649	0.151285	0.0795071	0	0.242966	0.243746	0.161762	0.0833702	0.075657	0.134914	AAEL020572				GO:0003723,GO:0005737,GO:0030430	RNA binding,cytoplasm,host cell cytoplasm
LOC110674275	0.202682	0.234692	0.218157	0.298556	0.217325	0.36986	0.206107	0.389606	0.232515	0.40862	0.473325	0.423613	AAEL025251
LOC110674276	1.06522	0.812104	1.76099	1.40142	0.939789	1.70219	2.18769	1.63073	1.73523	1.01222	1.69792	1.55805	AAEL021959
LOC110674277	0	0	0	0	0.062229	0	0	0	0	0	0	0	AAEL025902
LOC110674278	0.455656	1.08203	0.4414	0.901602	1.26356	1.20961	0.64355	0.968424	0.321347	0.662475	0.751481	0.536024	AAEL023135				GO:0003677	DNA binding
LOC110674279	0	0	0	0	0	0	0	0	0	0	0	0	AAEL027507
LOC110674280	0	0	0	0	0	0	0	0	0	0.116141	0	0	AAEL020206
LOC110674281	0	0	0	0	0	0	0	0	0	0	0	0	AAEL025706
LOC110674282	0	0	0	0	0	0	0	0	0	0	0	0	AAEL021819
LOC110674283	1.79666	2.3364	1.83715	1.18501	2.17973	2.73806	1.48023	2.01533	1.90062	2.06796	1.48156	1.23291	AAEL025378				GO:0008270	zinc ion binding
LOC110674284	0	0	0	0	0	0	0	0	0	0	0	0	AAEL026762
LOC110674285	0.183083	0.279489	0.221694	0.135849	0.0475968	0.20251	0	0.145918	0.0968384	0.0499094	0.135876	0	AAEL022260
LOC110674286	0.308287	0.125499	0.367927	0.375762	0.192351	0.345908	0.19071	0.108766	0.0456574	0.118329	0.10128	0.144702	AAEL026584
LOC110674289	5.07591	6.77717	6.18021	3.54753	5.2784	4.78004	8.23778	7.32399	7.98051	8.63236	7.00427	6.40945	AAEL021015				GO:0008083	growth factor activity
LOC110674290	5.64507	3.76165	3.97114	5.38546	4.61236	6.24404	5.83728	6.07027	7.6779	5.49598	5.51951	4.50622	AAEL026374				GO:0005634,GO:0006281,GO:0006974,GO:0070876	nucleus,DNA repair,cellular response to DNA damage stimulus,SOSS complex
LOC110674291	6.8758	4.60305	6.07399	0.0812198	0.359196	0.31936	8.63367	7.77418	8.64021	10.9819	9.7544	5.83409	AAEL022820
LOC110674292	0	0	0	0	0	0	0	0	0	0	0	0	AAEL025537
LOC110674294	0	0.0402154	0.0246081	0.0111698	0.0821838	0.032469	0.0388677	0.0197962	0.0298585	0.0566306	0.0407779	0	AAEL023780				GO:0003676,GO:0003677	nucleic acid binding,DNA binding
LOC110674295	0.0325991	0.0331765	0	0	0.0101699	0.0288464	0	0	0	0	0	0	AAEL020949
LOC110674296	0	0	0	0	0	0	0	0	0	0	0	0	AAEL022852
LOC110674297	0.28859	0	0	0.0854835	0.239004	0.178911	0	0	0	0	0	0	AAEL027207
LOC110674298	0	0	0.237759	0	0	0.0238903	0	0.26082	0	0	0	0	AAEL021899
LOC110674299	0	0	0	0	0.135191	0.0230077	0	0	0	0	0	0.0229401	AAEL026542
LOC110674301	0.0277475	0	0	0	0.0190439	0.0245533	0	0.0294864	0	0	0	0	AAEL026518				GO:0046983	protein dimerization activity
LOC110674302	0.217282	0.266658	0.179531	0.126451	0.186077	0.277094	0.331702	0.482172	0.202812	0.0836218	0.158095	0.0902139	AAEL025899
LOC110674303	0.169352	0.479588	0.0570622	0.276818	0.191422	0.325776	0.16379	0.438177	0.397248	0.184665	0.29873	0.110439	AAEL021194
LOC110674305	0.166824	0	0.0323211	0.0250071	0.208176	0.0742575	0.0749688	0.053721	0.0481301	0.0220495	0.0700336	0.0472781	AAEL020036
LOC110674306	3.3498	5.61662	4.18894	3.10417	9.91227	3.89597	7.54625	3.69663	4.30697	5.7964	4.4969	12.8835	AAEL027689				GO:0016747	transferase activity, transferring acyl groups other than amino-acyl groups
LOC110674308	0	0	0	0	0.0647457	0.0991701	0	0	0	0	0.0616104	0	AAEL026465
LOC110674309	0.0232119	0.0978669	0.046807	0.0632698	0.130049	0.145036	0.057204	0.0342312	0.012528	0.0294431	0.0515632	0.0125385	AAEL023915
LOC110674310	0.0635865	0.0647128	0	0	0	0	0	0	0	0	0	0.112203	AAEL022101				GO:0016020,GO:0016021	membrane,integral component of membrane
LOC110674311	0	0	0	0	0	0	0	0	0	0	0	0	AAEL025542
LOC110674312	0.176408	0	0.113641	0.116062	0.412754	0.0257567	0.0934321	0	0	0.192359	0.218204	0.103502	AAEL022870				GO:0003676	nucleic acid binding
LOC110674313	1.79513	1.8614	2.1327	2.07759	1.97241	2.96717	2.47558	2.55551	2.22147	2.03131	2.34612	1.52405	AAEL009724				GO:0003676,GO:0005634,GO:0008270,GO:0046872	nucleic acid binding,nucleus,zinc ion binding,metal ion binding
LOC110674314	0	0	0.0156739	0.064031	0.142008	0.0859053	0.0685565	0.0343883	0	0.113622	0.00704478	0	AAEL023811				GO:0003676,GO:0008270	nucleic acid binding,zinc ion binding
LOC110674315	0.087185	0.181927	0.113622	0.00620547	0.0136973	0.0122106	0.113613	0.111312	0.18645	0.180561	0.130961	0.0492522	AAEL027252
LOC110674316	0.087185	0.148733	0.105116	0.00620547	0.0136973	0.0122106	0.113613	0.112645	0.18645	0.200396	0.146478	0.0309901	AAEL024440				GO:0003723,GO:0005737,GO:0030430	RNA binding,cytoplasm,host cell cytoplasm
LOC110674317	0.087185	0.148733	0.105116	0.00620547	0.0136973	0.0122106	0.113613	0.112645	0.169862	0.200396	0.146478	0.023796	AAEL028186
LOC110674318	0.118546	0.235547	0.144003	0.00620547	0.0136973	0.0122106	0.180054	0.153304	0.20901	0.173038	0.137788	0.0431649	AAEL025290
LOC110674319	0	0	0	0.383697	0	0	0	0	0	0	0	0	AAEL020934
LOC110674320	0.687337	0.349756	0.221944	0.680013	1.31039	1.11506	0.242692	0.730412	0.363553	0.749485	0.680146	0.202142	AAEL020431
LOC110674321	0	0	0.108645	0	0	0	0	0	0	0	0.0554902	0	AAEL027262
LOC110674322	2.26586	2.20351	2.3335	2.64822	2.90605	3.27487	2.41829	2.9697	3.19595	1.93047	2.64873	2.11731	AAEL021322
LOC110674323	0.0760356	0	0	0	0.239603	0	0	0	0.121871	0	0	0	AAEL025168				GO:0003735,GO:0005840,GO:0006412	structural constituent of ribosome,ribosome,translation
LOC110674324	0	0.0526849	0.0160732	0.0164155	0.0862712	0.0340629	0.0175757	0.0472542	0	0	0.0216727	0.031035	AAEL022048
LOC110674325	0	0	0	0	0	0.114833	0	0	0	0	0	0	AAEL025699
LOC110674326	0.0207624	0.105651	0.201129	0.123247	0.0863628	0.146979	0.153951	0.154445	0.087855	0.0452795	0.0205452	0.0732735	AAEL026721				GO:0003676,GO:0003677	nucleic acid binding,DNA binding
LOC110674327	0	0	0	0	0	0	0	0	0	0	0	0	AAEL022231
LOC110674328	0.244111	0.248435	0.295593	0	0	0	0.193935	0.583672	0.129118	0.033273	0.422725	0.376907	AAEL027433				GO:0046983	protein dimerization activity
LOC110674329	0	0	0	0.0232061	0	0	0.0168954	0.0119645	0	0	0	0	AAEL022694
LOC110674331	0.0657678	0	0	0.162668	0.112846	0	0.0696659	0	0.173933	0	0.175715	0	AAEL027630
LOC110674334	0	0	0	0	0	0	0	0	0	0	0	0	AAEL025293
LOC110674336	0.0902759	0.0808223	0.054575	0.0335767	0.0882305	0.120126	0.0359498	0.0959335	0.071804	0.037007	0.112168	0.129954	AAEL025832
LOC110674337	0	0.217708	0.029357	0	0.0926885	0.223997	0.0321013	0	0.0320586	0.233261	0	0	AAEL021267
LOC110674339	0.0227588	0.0231619	0	0	0	0.0236928	0	0.0469475	0.0283243	0	0	0.0200797	AAEL022998
LOC110674340	0	0.0669327	0.0668957	0	0.247919	0.279345	0.186356	0.131043	0.121753	0.0896431	0	0.326396	AAEL021130				GO:0003677,GO:0006355	DNA binding,regulation of transcription, DNA-templated
LOC110674341	3879.28	2839.01	1812.01	2206.35	1794.41	1624.26	3904.82	4759.59	4889.88	1864.48	1926.66	3324.05	AAEL025723
LOC110674342	0.0590504	0.10772	0.0809476	0.141093	0.115861	0.205068	0.215976	0.0295996	0.176794	0.182235	0.11025	0.0491503	AAEL022081
LOC110674343	6.29145	5.39422	8.01484	7.24761	10.7547	9.95234	5.47754	5.26617	6.6099	4.04101	4.81847	4.10611	AAEL022520				GO:0006629,GO:0016788	lipid metabolic process,hydrolase activity, acting on ester bonds
LOC110674344	0	0	0	0	0.104515	0.0889359	0	0	0	0	0	0	AAEL025958				GO:0006520,GO:0016491,GO:0016639,GO:0055114	cellular amino acid metabolic process,oxidoreductase activity,oxidoreductase activity, acting on the CH-NH2 group of donors, NAD or NADP as acceptor,oxidation-reduction process
LOC110674346	2156.91	2405.9	1107.28	1095.79	1822.4	622.443	2775.49	2794.73	2946.54	1671.86	1876.67	2859.96	AAEL025120
LOC110674347	1.54655	0.759135	0.513839	4.05886	2.18397	3.38388	1.77692	2.67218	4.06816	2.40938	1.43523	3.25841	AAEL020532
LOC110674348	0.138988	0.0535214	0.203779	0.33076	0.474613	0.821028	0.274556	0.680609	0.333797	0.32359	0.150544	0.437479	AAEL027741
LOC110674349	0	0.0203099	0.0531631	1.21424	1.2244	1.8336	0.84733	1.2141	0.703703	0.0253876	0.105321	0.626523	AAEL023272
LOC110674350	0.0345617	0	0.0669608	1.12838	0.994831	1.79461	1.06169	0.906439	1.1334	0.301494	0.1026	0.680609	AAEL023010
LOC110674351	0	0	0.139423	0.142392	0.149667	0.254715	0	0	0	0	0	0.126983	AAEL026435
LOC110674352	0	0	0	0	0	0	0	0	0	0	0	0	AAEL022677
LOC110674353	0	0.12719	0.022371	0	0	0.057699	0.0287791	0.0476379	0.143704	0.103689	0	0.119853	AAEL026268
LOC110674354	0.063507	0.0646319	0	0	0.990608	0.0561964	0.134542	0	0	0.0692493	0	0	AAEL023861
LOC110674355	0.158062	0.0804308	0	0.502643	0.0978379	0.0399619	0.0877016	0.0959816	0.358302	0.0410366	0.0782042	0.116213	AAEL027456
LOC110674356	0	0.316242	0	0	0.323134	0	0	0	0	0	0.307487	0	AAEL024537
LOC110674357	0.268924	0.70962	0.616177	1.37012	0.782021	1.86241	0.900644	1.78311	1.59618	1.36084	1.16802	1.98765	AAEL021777
LOC110674358	0	0	0	0	1.00633	0	0	0	0	0	0.957602	0	AAEL025616
LOC110674359	0.141743	0.227678	0.0446668	0.126717	0.399573	0.412548	0.226121	0.226847	0.211368	0.357536	0.260242	0.289291	AAEL023139
LOC110674360	0.37727	0.127984	0	1.05754	0.500862	1.22408	0.13321	0.801827	0.864714	0.959892	0.808866	0.332859	AAEL021530
LOC110674361	0.385616	0.260676	0.279482	0.902251	0.670284	0.663771	0.132679	0.343978	0.193543	0.429691	0.376011	0.511577	AAEL026084
LOC110674362	0.0976556	0.0666762	0.0502939	0.0391352	0.0424202	0.158608	0.0995154	0.132675	0.087614	0.0673959	0.143116	0.0741631	AAEL020364
LOC110674363	0.128968	0	0	0	0	0	0	0	0	0	0	0	AAEL025000
LOC110674364	0	0	0.0885086	0	0.287915	0	0.29328	0.147111	0.29289	0	0	0	AAEL020407
LOC110674365	0	0	0	0	0	0	0	0	0	0	0	0	AAEL025204
LOC110674366	8.15548	6.94736	5.79358	3.76534	2.19873	4.81111	5.50327	5.07156	4.47345	5.40161	4.00519	3.73098	AAEL027739
LOC110674367	0.317706	0.353995	0.228172	0.303483	0.276267	0.477442	0.101541	0.104778	0.278143	0.483812	0.0298121	0.381798	AAEL022199
LOC110674368	0.0570267	0.0791411	0	0	0.0593017	0.0259956	0.0567457	0	0	0.0621831	0.0547201	0	AAEL026875
LOC110674369	0	0	0	0	0.0321589	0.0977329	0	0	0	0	0	0.194891	AAEL021277
LOC110674370	0.100545	0.0775195	0.0811661	0.108517	0.248716	0.0808824	0.158143	0.157031	0.107974	0.199338	0.206523	0.153225	AAEL021649
LOC110674371	2.89447	3.5659	1.03302	0.678229	4.19808	2.02206	1.53301	0.40472	0.644621	0.332231	6.55749	3.69622	AAEL024421
LOC110674372	0	0.174093	0	0.25386	0.711548	0.151371	0.0362403	0	0.180961	0.018653	0	0.301852	AAEL020862
LOC110674373	0	0.112828	0	0.0263898	0	0	0	0.0292315	0.0149905	0.0299948	0.0824842	0.0161797	AAEL025329
LOC110674374	0	0.471016	0	0.0413131	0	0	0	0.122031	0.0625801	0	0	0.0675446	AAEL021816
LOC110674375	0.148743	0.0455957	0	0	0	0	0.0322711	0.0952198	0	0.0644862	0	0	AAEL026639
LOC110674376	1.35966	1.0218	0.222645	0.605565	0.397501	0.888438	0.827755	0.771281	0.639825	0.989276	1.17785	1.35115	AAEL023023
LOC110674377	0.0146235	0.0202944	0	0.0438415	0	0.0078425	0.0173679	0	0.00937554	0	0.00745451	0	AAEL027812				GO:0046983	protein dimerization activity
LOC110674378	0	0.0393797	0	0.038282	0	0	0	0	0.0818664	0	0.0382895	0	AAEL024183
LOC110674379	0.735765	0.50923	0.662327	0	0.0947171	0	0.0751807	0	0.0125135	0.193479	0.150998	0	AAEL020697
LOC110674380	0.253555	0.0519944	0.0824852	0	0.15348	0.0803703	0.188409	0.0985286	0.0340287	0.0680887	0	0.0233725	AAEL027370
LOC110674381	0.123916	0.640941	0.155345	0.666345	0.189499	0.647589	0.311937	0.506589	0.493501	0.309983	0.115407	0.321557	AAEL020841
LOC110674382	0	0	0	0	0	0	0	0	0	0.0171902	0	0	AAEL024543
LOC110674383	0	0	0	0	0	0	0.0708117	0	0	0.036447	0	0.117961	AAEL027383
LOC110674385	0.28742	0.10668	0.175246	0.501807	0.175815	0.400949	0.125364	0.161699	0.173487	0.0313408	0.0552095	0.272978	AAEL022244
LOC110674386	0.0419188	0.156994	0.0860877	0.19409	0.0470784	0.176564	0	0.0356367	0.0248328	0.118844	0	0.0207112	AAEL028176
LOC110674387	0.224804	0.876249	0.812284	1.459	0.521311	0.525163	1.17397	0.358338	0.627821	0.669206	0.629539	0.957986	AAEL021566
LOC110674388	0	0.246041	0	0	0	0	0.192547	0	0.0480727	0	0.143897	0.320752	AAEL027043
LOC110674389	5.94078	5.90647	6.41042	0.0153145	0.0195463	0.0733794	3.31451	3.52137	2.92529	2.67051	2.27355	2.09639	AAEL024518
LOC110674390	36.2214	40.0262	30.9193	38.0826	33.6885	31.0997	36.7221	30.3612	37.3056	43.2768	43.1766	32.8014	AAEL026769
LOC110674391	0	0	0.0579014	0.236538	0	0.18406	0.106367	0	0.151751	0	0.0236584	0	AAEL024205
LOC110674392	0	0	0	0.0324286	0	0	0	0	0.0448727	0.0231269	0	0.0425285	AAEL022178
LOC110674393	0.278341	0.170645	0	0.607153	0.418475	0.22256	0	0	0	0.610674	0.331842	0.346174	AAEL027800
LOC110674394	0.58874	0.10649	0.28455	0.124725	0.305458	0.446224	0.0440684	0.446118	0.500111	0.263938	0.333082	0	AAEL024123
LOC110674395	0.255305	0.563824	0	0.0631461	0	0.045183	0.540873	0.054261	0.270077	0.0556779	0	0.225251	AAEL021370
LOC110674396	0	0	0	0.0221754	0	0	0	0	0	0.0244409	0	0.0197758	AAEL024989
LOC110674397	0.500335	0.760653	0.649234	0.229169	0.443214	0.103852	0.667395	1.04041	0.980157	1.24943	0.421752	0.599484	AAEL026489
LOC110674398	0	0	0	0	0.037206	0.141837	0.151597	0.0258542	0.0499604	0.0624219	0	0.0138894	AAEL025820
LOC110674399	0.084918	0.044319	0.0232019	0.0955022	0.163781	0.0590865	0	0.212102	0.0514419	0.0261169	0.017955	0	AAEL023228				GO:0006506,GO:0016021,GO:0016746	GPI anchor biosynthetic process,integral component of membrane,transferase activity, transferring acyl groups
LOC110674400	0.661341	0.612225	0.554732	0.440647	0.491232	0.667106	0.671945	0.295048	0.562949	0.630734	0.246124	0.486526	AAEL020854
LOC110674401	26.3962	19.209	18.5592	21.6221	15.0528	21.4739	20.4444	21.5657	21.7683	13.9272	12.2174	12.0201	AAEL024661
LOC110674402	0.228854	0.372653	0.0443389	0.199246	0	0.746855	0	0.453319	0	0.0239565	0.0597854	0.264912	AAEL022024
LOC110674403	0.238123	0.11932	0.0290543	0.364169	0.210763	0.223579	0.17618	0.130386	0.267284	0.171451	0.152891	0.234951	AAEL026779
LOC110674404	0	0	0	0.321178	0	0	0	0	0	0	0	0	AAEL026398
LOC110674405	0	0	0	0	0	0	0	0	0	0	0	0	AAEL022823
LOC110674406	0	0	0.147354	0	0	0	0	0	0	0	0	0	AAEL027294
LOC110674407	0.137921	0.214843	0.163599	0.160122	0.139033	0.19552	0.377165	0.1346	0.0476413	0.0598498	0.0960918	0.173837	AAEL023748
LOC110674408	1.01358	0	0	0	0	0.224225	0.0536827	0	0.624571	0.82892	0.250744	0.670699	AAEL020588
LOC110674409	0.0678766	0.103618	0.054575	0.0429782	0.0282338	0.120126	0	0.158687	0.107706	0.111021	0.114183	0.0598865	AAEL023198
LOC110674410	2.51654	2.65454	1.06865	0.746918	0.324237	0.662452	0.955627	2.4657	1.44493	2.35922	1.28896	1.35872	AAEL026068
LOC110674411	0.0552807	0.033488	0	0.0221371	0.0615922	0	0.0278844	0	0.0431633	0.0358805	0	0.0383219	AAEL020458
LOC110674412	0.881486	1.06891	1.00916	0.396406	0.666656	0.173021	0.500254	0.624486	0.753904	0.456711	0.325645	0.251699	AAEL024875
LOC110674413	0.56377	0.179552	0.192753	0.351719	0.740758	0.76298	0.477748	0.709055	0.928966	0.216969	0.32816	0.47985	AAEL027455
LOC110674414	0.0652368	0	0	0	0	0.0297382	0.0355987	0	0.0522814	0.0258675	0	0	AAEL027760
LOC110674415	0.183465	0.031917	0.0501276	0.387842	0.489189	0.197034	0.137864	0.0549895	0.15261	0	0.0512051	0	AAEL022205
LOC110674416	0.225508	0.310503	0.264714	1.18902	1.11734	0.993048	0.778448	0.48492	0.513597	0.410795	0.32816	0.152148	AAEL025627
LOC110674417	1.29091	1.20646	1.35422	1.55377	1.46701	1.36709	1.62128	2.06621	2.0146	2.04699	1.30428	2.10311	AAEL022106
LOC110674418	0	0	0	0.026689	0	0	0	0	0	0	0	0	AAEL021454
LOC110674419	1.00333	0.587514	0.127941	1.51109	0.50728	1.03863	0.954488	1.13412	0.703083	1.42389	0.491147	0.343941	AAEL026133
LOC110674420	0.434856	0.295039	0.842502	0	1.05514	0.384797	0	0.462108	0.460017	0.316117	0.573742	0.383667	AAEL021233
LOC110674421	0.145471	0.296095	0	0.0719604	0.302548	0.257449	0.154093	0.309175	0.153888	0.317248	0.431846	0.256693	AAEL025913				GO:0016020,GO:0016192	membrane,vesicle-mediated transport
LOC110674422	0	0	0.055299	0	0	0	0	0	0	0	0	0	AAEL020079
LOC110674423	0	0.074343	0	0.0722707	0.151927	0	0.232136	0	0.0386379	0.119481	0.0361424	0.032225	AAEL024866
LOC110674424	0	0	0.197655	0.226088	0.657753	0.541652	0.216132	0	0.215845	0.444976	0.403808	0.576065	AAEL027109
LOC110674425	0.338704	0.114901	0.255924	0.520515	0.429704	0.133872	0.239186	0.779851	0.238868	0.411187	0.632336	0.663411	AAEL025535
LOC110674426	0.102897	0.176715	0.259579	0	0.0691057	0.273157	0.0931009	0.211858	0.108851	0.194015	0.201521	0.344226	AAEL021640
LOC110674427	0.0488516	0.0278414	0.193079	0	0.0284482	0.178099	0.0807253	0.157816	0.0599467	0.0809684	0.0483405	0.043101	AAEL024656
LOC110674428	0.245438	0.249785	0.237759	0.242823	0.127615	0.54296	0.779955	1.04328	0.908737	0.936706	0.48574	0	AAEL027343
LOC110674429	7.90977	5.44471	5.00274	6.32861	5.78109	7.61677	2.36558	3.65913	5.53695	1.97855	2.66978	5.60313	AAEL023703
LOC110674430	0.363793	0.0595784	0.0688621	0	0	0.062903	0	0.444359	0.0751992	0.150468	0.264818	0	AAEL027244
LOC110674431	0.619581	0	0.600197	0	0	0	0.328152	0.329205	0	0	0	0	AAEL023918
LOC110674432	1.22403	1.74208	1.65821	1.44297	0.881083	1.22007	2.07982	1.7908	2.10847	1.36027	0.541413	0.907535	AAEL026329
LOC110674433	0.449069	0.867569	0.239629	0.444284	0.237449	0.858731	0.100781	0.647067	0.712578	0.971047	0.685385	0.245111	AAEL021438
LOC110674434	0	0	0	0	0	0	0	0	0	0	0	0	AAEL021850
LOC110674435	3.90813	3.6849	5.01069	0.303633	1.71287	1.22056	2.17094	1.99469	2.22885	1.92143	2.40792	1.62263	AAEL024631				GO:0005634,GO:0008270	nucleus,zinc ion binding
LOC110674436	1.27467	1.19333	0.145176	0.852131	0.931632	1.68316	0.504152	0.680777	0.825779	0.795526	1.04459	0.225215	AAEL020908
LOC110674437	0.161921	0.117024	0.255742	0.260028	0.108593	0.118363	0.609013	0.451368	0.0695089	0.927589	0.622331	0.124226	AAEL023260
LOC110674438	0	0.0095222	0	0	0	0	0	0	0	0	0.00925858	0.0825507	AAEL025105
LOC110674439	0	0	0.173602	0	0.0614981	0.0269584	0	0	0	0	0.0177334	0	AAEL027345
LOC110674440	0	0	0	0	0	0.0585379	0	0	0	0	0	0.175098	AAEL024638
LOC110674441	0.170217	0.232384	0.413235	0.0492888	0.0992969	0.0725559	0.283652	0.251474	0.0439185	0.0724324	0.122219	1.47616	AAEL024067
LOC110674442	0	0	0	0	0	0	0	0	0	0	0	0	AAEL027517
LOC110674443	0	0	0	0	0	0	0.186228	0	0.0378266	0	0	0	AAEL022888
LOC110674444	0.227897	0.0575475	0.0547768	2.02074	2.50887	2.19858	0.544522	1.51681	0.92083	0.435348	1.41242	1.34853	AAEL023304
LOC110674445	0.0806439	0.218859	0.156242	0.106379	0.0559074	0.0951473	0	0.114264	0.0284367	0.117248	0.0532001	0	AAEL027647
LOC110674446	0	0.15621	0	0	0.319229	0.271644	0	0.163111	0	0	0	0	AAEL022973
LOC110674447	0.554243	0.267074	0.268452	0.492258	0.268529	0.131899	0.266861	0.466274	0.275389	0.219766	0.0685556	0.379716	AAEL026450
LOC110674448	0.112296	0.0421633	0.0475263	0.0862907	0.1848	0.0675321	0.127036	0.141346	0.03806	0.297207	0.147802	0.109658	AAEL021763
LOC110674449	0	0	0	0	0	0	0	0	0.0601178	0	0.056235	0	AAEL025396
LOC110674450	0.163696	0.369761	0	0.677432	0.871891	0.768422	0.260097	0.396702	0.141491	0.452774	0.246926	0.267717	AAEL025063
LOC110674451	0.261063	0.159094	0.118119	0.502643	0.162561	0.207494	0.16559	0	0.363814	0.42615	0.386724	0.344808	AAEL020331
LOC110674453	0.346796	0.117646	0.335946	0.114367	0	0.102292	0	0	0	0	0.228779	0.101991
LOC110674454	0.140562	0.344704	0.136165	0.541179	0.528325	0.693838	0.17939	0.0899828	0.299182	0.0923324	0.564746	0.254009	AAEL026763
LOC110674455	0	0.102387	0	0	0	0	0	0	0	0	0	0	AAEL022182
LOC110674456	0	0.0896887	0.0853706	0	0	0	0.093351	0.0936507	0	0	0	0	AAEL028042
LOC110674457	0	0	0	0	0	0.03246	0	0	0.0388053	0	0	0	AAEL023356
LOC110674458	0.674213	0.596185	0.859477	1.00107	0.498419	0.69085	0.939821	0.645159	0.563368	0.464566	0.316189	0.469864	AAEL023673
LOC110674459	0.23741	0.523096	0.38292	0.23488	0.12344	0.42016	0.377221	0.504576	0.627866	0.388314	0.352389	0.104731	AAEL025117
LOC110674460	0	0	0	0.0516061	0.325457	0	0	0	0	0	0	0.0460216	AAEL023153
LOC110674461	0	0	0	0	0	0	0	0	0	0.286623	0	0	AAEL021536
LOC110674462	1.79314	0.912451	0.86852	0.295672	0.310779	0.264454	0.94971	0.317586	0	0.977638	0.88719	0	AAEL025716
LOC110674463	1.77023	1.20106	0.914586	0.817306	0.981788	0.41772	1.37511	1.00329	1.74781	1.02949	1.40137	1.24948	AAEL020501
LOC110674464	0.36507	0.247691	0.353649	0.481574	0.126545	0.64609	0.128903	1.03453	1.15858	0.132693	0.361251	0.429461	AAEL021898
LOC110674465	3.52302	4.52895	3.05356	1.10068	2.89229	1.47669	3.92824	4.33494	6.08067	5.0547	4.03661	5.23504	AAEL024582
LOC110674466	0.261286	0.0837137	0.117181	0.143612	0.0830224	0.351094	0.171701	0.264806	0.683333	0.126627	0.198702	0	AAEL023375
LOC110674467	0.0507042	0.197637	0	0	0	0.0448674	0	0	0	0	0	0.0894711	AAEL027972
LOC110674468	3.44877	1.8091	2.74445	1.80677	1.30938	1.68359	2.34882	3.14345	2.64442	1.71625	2.89735	2.23615	AAEL026198
LOC110674469	0	0	0	0.0504938	0	0	0	0	0	0.0843219	0	0	AAEL022742
LOC110674470	0.799878	1.19965	0.606165	0.899267	0.686523	1.50704	0.672964	1.32788	0.799601	0.957753	0.736596	0.548706	AAEL024399
LOC110674471	0.176424	0.109093	0.0432669	0	0.0580576	0.0612602	0.0733329	0.0403439	0	0.0413974	0	0.0275846	AAEL020674
LOC110674472	0	0	0	0	0	0	0	0	0	0	0	0	AAEL025312				GO:0005515	protein binding
LOC110674473	0.0544919	0	0	0	0	0	0	0	0	0	0	0	AAEL021643
LOC110674474	1.57434	1.9921	1.41905	0	0	0	0	0	0	0	0.180517	0	AAEL026617
LOC110674475	0.284314	0.0968693	0.216743	0.167548	0.156826	0.266899	0.366636	0.106403	0.133383	0.133444	0.264214	0.191952	AAEL022138
LOC110674476	0.240785	0	0.116626	0.238219	0	0.3196	0.255056	0	0.211415	0	0	0.10622	AAEL027592
LOC110674477	1.30062	1.82004	1.96865	3.69945	2.78955	5.32292	1.2055	2.93704	2.49378	2.83645	1.44789	2.43848	AAEL024110
LOC110674478	0	0.336844	0	0	0	0	0.641595	0.819517	1.0504	1.08273	0	0.29202	AAEL020694
LOC110674479	0.285425	0	0.276495	3.3886	2.07768	3.91481	0	0.758282	0.075485	0.622466	1.69463	1.0073	AAEL024404
LOC110674480	0	0.0786823	0	0.453471	0.511097	0.244332	0.438725	0	0	0.301084	0.683072	0.258231	AAEL021496
LOC110674481	0	0	0	0	0	0	0	0	0	0	0.12247	0	AAEL025523
LOC110674482	0	0	0	0	0	0	0	0	0	0.167877	0	0	AAEL023974
LOC110674484	0	0.0453263	0.0175772	0.0342711	0.0171534	0.0321122	0.0961016	0.0613519	0.0715441	0.151089	0.0701879	0.0480268	AAEL027781
LOC110674485	0	0	0	0	0	0.0583413	0	0.173097	0	0	0	0.085544	AAEL022235
LOC110674486	0	0	0	0.0372328	0	0.0514661	0	0.152698	0	0	0	0.075463	AAEL020996
LOC110674487	0	0	0	0	0	0	0	0	0	0	0	0	AAEL023462
LOC110674488	0.0352817	0	0.300765	0.174529	0	0.368399	0.100159	0	0.0850967	0	0	0	AAEL025445
LOC110674489	0	0.125925	0	0	0	0	0	0	0	0.204426	0	0.109168	AAEL021969
LOC110674490	0.0958597	0.0975576	0.0928607	0	0	0.169649	0.203083	0.305602	0	0	0	0	AAEL025428
LOC110674491	0.119975	0.124592	0	0.100529	0.105665	0.144079	0	0	0.0427372	0.0854353	0.0605712	0	AAEL021920
LOC110674492	0	0	0	0	0.106196	0.180732	0.216349	0	0	0	0	0	AAEL020005
LOC110674493	0.148121	0.100497	0.239146	0.146543	0.0513435	0.262141	0.209201	0.314808	0.104461	0.161514	0.195429	0.217809	AAEL020613
LOC110674494	0.267789	0.125881	0.0599101	0.061186	0.192937	0	0.0216185	0.0985812	0.0130847	0	0.122396	0	AAEL027824
LOC110674495	0.189276	0.144833	0.321215	0.0703982	0.0488367	0.797139	0.101001	0.151232	0.150547	0.361571	0.140824	0.12556	AAEL024102
LOC110674496	0.482834	0	0	0.23528	0.247301	1.06494	0	0	0.251574	0	0.235326	0.425997	AAEL026511
LOC110674497	0.0366828	0	0.355351	0.0725838	0.762924	0.03246	0.815996	0.0974542	0	0.0399996	0.36299	0.356011	AAEL022960
LOC110674498	0	0.0986335	0.0733475	0.304133	0.170072	0.245221	0.0930366	0.120692	0	0.170079	0.0749241	0.0975329	AAEL021988
LOC110674499	0.452108	0	0.766436	0.148724	0.117536	0.450071	0.119726	0.180166	0	0.246494	0.726989	0.149583	AAEL022257
LOC110674500	0.284625	0	0.275721	0.211195	0.221985	0.188895	0.0753738	0.302463	0	0	0.0394307	0	AAEL020053
LOC110674501	0.537626	0.820723	1.30201	0.265949	0	1.18934	0.284745	0.571319	0.284367	0	0	0.474339	AAEL028173
LOC110674502	0	0	0	0.191848	1.2099	0	0.410816	0	0.820539	0	0	0.342176	AAEL023648
LOC110674504	0.26834	0.182062	0	0	0.18603	0	0.0378992	0.0950522	0	0	0	0	AAEL022492
LOC110674505	1.7259	0.443552	0.607964	0.657871	1.07478	1.26717	1.75696	1.32857	1.15921	1.02652	0.916763	0.92946	AAEL020060
LOC110674506	2.37093	1.72352	0	0	0.176108	0.149857	1.25573	1.93463	3.22472	3.33874	0	0.672376	AAEL024705
LOC110674507	1.72168	0.442468	0.606478	0.656263	1.07215	1.26408	1.75267	1.32532	1.15638	1.02401	0.914522	0.927188	AAEL021268
LOC110674508	0.272712	0.266867	0.199405	0.330772	0.194969	0.402584	0.120828	0.387332	0.183081	0.353127	0.101197	0.613091	AAEL025816
LOC110674509	0.62434	0.317699	1.28521	0.926531	0.486935	1.65741	0.868014	0.497601	0.660465	0.170198	1.7762	0.550845	AAEL022374
LOC110674510	0.524935	0.63043	0.135712	1.22404	0.995216	0.921546	0.95297	0.647517	0.683869	0.67915	0.63636	0.488459	AAEL020797
LOC110674511	0.458218	0.0514784	0.191676	0.260521	0.20576	0.0447596	0.452282	0.216591	0.196725	0.184935	0.122189	0	AAEL024677
LOC110674512	0.16442	0.167332	0.318551	0.162668	0.213724	0	0.174165	0.174724	0.2609	0	0.325399	0	AAEL022036
LOC110674513	0.634115	0.388763	0.244231	0.377927	1.58895	1.06815	0.267061	0.811875	1.27696	1.66615	0.756002	0.957166	AAEL025301
LOC110674514	0	0.0999141	0	0	0.102092	0	0.103994	0	0	0.214104	0	0	AAEL026925
LOC110674515	0	0	0.317524	0.278886	0.224964	0.580092	0	0	0	0.357416	0	0	AAEL023316
LOC110674516	2.35945	2.58382	0.104272	1.50509	4.19078	2.50185	2.21044	2.8947	3.60428	4.38814	2.10754	0.933222	AAEL024877
LOC110674517	1.447	1.03738	1.03728	0.677614	0.668765	0.389818	1.3863	0.779091	0.690525	0.315567	1.11367	0.973101	AAEL020813
LOC110674518	0	0	0	0	0	0	0	0	0	0.0674428	0	0	AAEL024538
LOC110674519	2.09257	1.51403	0.643073	1.68566	1.33103	1.91627	1.80182	1.55854	1.82912	1.80278	1.10686	1.55154	AAEL022070
LOC110674520	1.42726	0.979118	0.667974	1.03666	1.12994	1.30038	1.21072	1.11849	1.47504	1.51404	0.771838	1.09757	AAEL026346
LOC110674521	1.09184	0.83312	0.0991262	2.02475	3.35191	1.28307	3.21601	2.51952	2.03832	2.06423	0.911313	0.526344	AAEL022894
LOC110674522	0.702838	0.860658	0	1.12412	2.53191	0.909197	1.81911	2.38555	1.74629	1.81774	1.12434	0.525584	AAEL025485
LOC110674523	0	0	0	0	0	0	0	0	0	0	0	0	AAEL021974
LOC110674524	0.144606	0.219436	0.150087	0.127736	0.0872709	0.268486	0.2325	0.271663	0.214435	0.157681	0.106042	0.248332	AAEL024555
LOC110674525	0.102638	0	0.0656215	0.168563	0.106732	0	0	0	0	0	0.0345317	0.0199222	AAEL023836
LOC110674526	1.01751	0.308669	1.04254	1.08825	1.3328	1.12176	1.14	1.14366	0.838338	0.772697	1.01378	0.511758	AAEL026391
LOC110674527	1.447	1.03738	1.03728	0.677614	0.668765	0.389818	1.3863	0.779091	0.690525	0.315567	1.11367	0.973101	AAEL022952
LOC110674529	0.132999	0.676774	0.773029	0.789492	0.414915	1.17689	1.26794	0.424003	1.0327	1.40094	0	0.352029	AAEL021978
LOC110674530	0.236436	0.343749	0.100886	0.231132	0	0.112081	0.149077	0.598223	0.396018	0.460383	0.389938	0.911401	AAEL022041
LOC110674531	0.166355	0.0701609	0.164054	0.0859979	0.0592222	0.0583514	0.0746134	0.0589268	0.126833	0.0702707	0.0978788	0.144128	AAEL025033
LOC110674532	0	0	0.0171866	0.0973372	0.0805066	0.0156993	0.124718	0.166254	0.0580108	0.0386917	0	0.0170762	AAEL027481
LOC110674533	1.53475	0.689407	0.990475	3.60646	1.98562	3.22567	1.81632	2.22032	2.27746	0.311622	2.01096	0.806851	AAEL023220
LOC110674534	0.122571	0.0835771	0.198289	0.48506	0.127461	0.78092	0.37912	0.11332	0.302115	0.177759	0	0.153562	AAEL027853
LOC110674535	0.288711	0.0381591	0.565411	0.0123651	0	0.234463	0.313766	0.132816	0.290872	0.068142	0.336397	0.479678	AAEL023804
LOC110674536	0.146221	0.5221	0	0.164278	0	0.201759	0.118135	0.192256	0.367041	0.0999893	0.103001	0.0699708	AAEL026242
LOC110674537	0.0317535	0	0	0	0.109627	0	0.134542	0.083684	0	0.0166198	0	0	AAEL022949
LOC110674538	0.405149	0.677862	0.156989	0.0801664	0.168525	0	0.514994	0.172216	0.171436	0.353426	0.160364	0	AAEL025628
LOC110674539	0.413972	0.478755	0.0619759	0.046541	0.0528325	1.08563	0.298983	0.439916	0.226925	0.410366	0.526947	0.0232426	AAEL020391
LOC110674540	0	0	0.113576	0	0.0738915	0	0.0940855	0	0	0	0.0351567	0.0783655	AAEL024155
LOC110674541	0.112901	0.174093	0.0563417	0.216627	0.177887	0.087795	0	0	0.144768	0.0410366	0.0575528	0.0513149	AAEL027773
LOC110674542	0	0	0.0111223	0.0113592	0	0.0690866	0.0206754	0.0122011	0.0121458	0.0125197	0.0113614	0	AAEL024293
LOC110674543	0	0.019783	0.0342373	0.0874162	0.0312401	0	0.0187189	0	0.037388	0.0327579	0.0874332	0	AAEL020866
LOC110674544	0	0.019783	0.0342373	0.0874162	0.0312401	0	0.0187189	0	0.037388	0.0327579	0.0874332	0	AAEL025420
LOC110674545	0.0479143	0.129474	0.0752247	0.0768267	0	0.0394745	0.115509	0	0	0.0396354	0.0653972	0	AAEL020944
LOC110674546	0.0348264	0.0458678	0.0496131	0.0709375	0	0	0.121522	0	0	0.0268062	0	0	AAEL027297
LOC110674547	0.0557223	0.0667168	0	0	0	0	0	0	0	0	0	0	AAEL024076
LOC110674548	0	0	0	0.0221606	0	0.0306321	0	0.0908844	0	0	0	0.0449149	AAEL026484
LOC110674549	0	0	0	0	0.0515942	0.0298543	0	0.069596	0.0524856	0.0367887	0.0981916	0	AAEL025407
LOC110674550	86.4733	69.8552	31.3376	54.983	45.9319	37.0667	38.0013	33.2753	40.5832	65.1226	59.3029	43.7273	AAEL022552
LOC110674551	0	0	0	0.0872644	1.43638	0.312202	0	0.046866	0.186616	0.336629	0.960096	2.93075	AAEL021096
LOC110674552	0.519972	0.396887	0.419754	1.02886	0.495656	0.843545	0.275396	0.230233	0.412544	0.377992	0.300144	0.305842	AAEL025210
LOC110674553	0.28304	0	0.0466114	0.0336029	0	0	0.173893	0.150389	0.149708	0	0.0308086	0.124861	AAEL020479
LOC110674554	0.441314	0.185752	0.361534	0.0377319	0.070821	0.0602642	0.424187	0.0405284	0.337169	0.109908	0.14287	0.26198	AAEL027761
LOC110674555	0.953559	0.853995	1.15724	1.63472	1.45488	3.38596	1.34623	0.72959	0.806987	0.803542	0.301947	1.00957	AAEL025971
LOC110674556	0.432048	1.70384	0.195702	1.38524	4.01651	2.44786	1.07846	2.06394	1.99323	2.79178	1.12622	0.3406	AAEL021833
LOC110674557	0	0	0	0	0	0	0	0	0	0	0	0	AAEL025152
LOC110674558	0	0	0	0	0	0	0	0.365412	0	0	0	0	AAEL020410
LOC110674559	0.24609	0	0	0	0	0	0	0.278384	0	0.579963	0.259226	0.175098	AAEL027805
LOC110674560	0	0	0	0.130726	0	0	0	0	0	0.144082	0.130752	0	AAEL027461
LOC110674561	0	0	0	0	0	0.108632	0.164051	0	0	0	0.026165	0.0166636	AAEL024163
LOC110674562	0.447393	0.270104	0.393729	0.487639	0.600871	0.91122	1.40566	0.425471	0.875968	0.105838	0.718845	0.396066	AAEL024294
LOC110674563	0.206527	0.210185	0.144047	0.196153	0.154632	0.292404	0.0875071	0.158019	0.0873907	0.252225	0.147144	0.258746	AAEL020860
LOC110674564	0.0555687	0.172352	0.170462	0.185873	0.0151343	0.132296	0.0448474	0.0520213	0.0433881	0.106759	0.0733164	0.0898835	AAEL025556
LOC110674565	0.181449	0.336496	0	0.239354	0.159336	0.132017	0.0854236	0.214245	0.238868	0.38252	0	0.355754	AAEL022871
LOC110674566	0	0.105652	0.100566	0	0.163568	0	0	0	0	0	0	0	AAEL027237
LOC110674567	0.131621	0	0	0	0	0.349408	0	0	0.139237	0.932893	0.976828	0	AAEL023784
LOC110674568	0	0	0	0	0	0.0879787	0	0	0	0.108414	0	0	AAEL024691
LOC110674569	13.5789	11.3728	16.4109	9.86103	10.8424	11.815	7.87957	6.54925	6.44152	9.92257	13.9754	6.45288	AAEL020789
LOC110674570	0	0	0	0	1.06732	0	0	0	0	1.11918	0	0	AAEL020892
LOC110674571	1.06239	0.968583	2.54755	2.62171	2.58827	2.48021	2.4873	0.855282	0.791812	1.15845	1.07517	1.48943	AAEL026509
LOC110674572	0	0	0	0	0.10829	0	0	0	0	0	0	0	AAEL023362
LOC110674574	0.405024	0.502592	0.564437	0.0386649	0.163793	0.235789	0.292292	0.58772	0.209218	0.0322841	0.2543	0.478552	AAEL022171
LOC110674575	0	0.0648345	0.0956552	0.170174	0	0.34951	0	0	0	0	0	0.0309138	AAEL023317
LOC110674576	0.333699	0.169805	0.161629	0.165072	0.173506	0.147642	0	0	0.52951	0.181936	0	0.147209	AAEL024754
LOC110674577	0	0	0	0	0	0	0	0	0	0	0	0	AAEL022377
LOC110674578	0.0574724	0	0.222698	0	0.179296	0.101713	0	0	0	0.125338	0	0	AAEL028084
LOC110674579	0.0342356	0	0.331645	0	0.106804	0.0605891	0	0	0	0.0746624	0	0	AAEL026065
LOC110674580	0.0613595	0.0830536	0.0469574	0.0364234	0.188232	0.0814441	0.0201488	0.0762897	0.0434896	0.0388064	0.0261085	0.0698361	AAEL021630
LOC110674581	0	0	0	0	0.0429532	0.0365505	0	0	0	0	0	0	AAEL023785
LOC110674582	0.976265	1.45722	0.0746284	0.801601	2.14921	1.29641	0.944082	1.40585	1.71423	1.82927	0.977881	0.42657	AAEL020130
LOC110674583	0.0165834	0.0429601	0.112452	0.108881	0.0329223	0.0773743	0.0910256	0.0352455	0.0494393	0.149595	0.0984597	0.11173	AAEL023467
LOC110674584	0.0604486	0.0410129	0.0934131	0.0882829	0.0164634	0.0611315	0.0579332	0.0565897	0.0167478	0.105149	0.0797549	0.097777	AAEL027430
LOC110674585	0.462949	0.430074	0.63935	0.37111	0.678922	1.20376	0.774561	0.701361	1.1176	0.582471	0.281911	0.414736	AAEL025682
LOC110674586	0.400512	0.314007	0.349183	0.428531	1.36053	0.288776	0.15713	0.19389	0.240089	0.0938152	0.384579	0.167521	AAEL020098
LOC110674587	0	0	0	0	0	0	0	0	0	0	0	0	AAEL024590
LOC110674588	0.224804	0.0857946	0	0.0834032	0.27702	0.236721	0.178596	0.505257	0.202139	0.0857956	0.0778581	0.123963	AAEL028204
LOC110674589	0.0243322	0.0693369	0.0942838	0.0558492	0.101212	0.114546	0.144336	0.0765371	0.0463322	0.162378	0.0510446	0.0429359	AAEL022942
LOC110674590	0	0.0387018	0.0176825	0	0	0.0161523	0.0193354	0.0193975	0	0.0182453	0.0180626	0	AAEL022903
LOC110674591	0.200219	0	0.0969776	0.099043	0.104103	0	0	0.212767	0	0	0	0	AAEL020930
LOC110674592	0	0	0	0	0.987522	0	0	0	0	0.207101	0	0	AAEL023770
LOC110674593	0.12446	0.0850731	0.170952	0.24443	0.144879	0.292591	0.458477	0.483637	0.275113	0	0.220581	0.188478	AAEL021990
LOC110674594	1.53879	1.49165	0.644413	0.361614	0.304072	0.905611	0.851778	0.737988	0.676649	0.916682	0.976547	0.790082	AAEL025487
LOC110674595	0.771111	0.493434	1.10174	0.127574	0.0992285	0.130079	0.245864	1.14831	0.411956	0.438696	0.423629	0.279872	AAEL027464
LOC110674596	0.181611	0.184828	0.351858	0.0898379	0.094428	0.652461	0.38475	0.385985	0.192119	0.49508	0	0.240349	AAEL023831
LOC110674597	0.725201	0.926259	1.30438	0.20558	0.079951	0.226165	0.62071	1.42206	0.881467	0.505279	0.565455	0.3465	AAEL026328
LOC110674598	0.945576	0.921581	0.428448	0.235761	0.182386	0.534762	0.680536	0.486211	0.47796	0.557113	0.688557	0.580287	AAEL022885
LOC110674599	0.943805	0.919855	0.427646	0.23532	0.182044	0.533761	0.679262	0.4853	0.477065	0.55607	0.687268	0.5792	AAEL021917
LOC110674600	0.109138	0.0421304	0.0401021	0.103011	0.0691388	0.0921343	0	0.0706531	0.0663522	0	0.393503	0.0553396	AAEL023383
LOC110674601	0.114278	0	0.0226741	1.38533	1.71813	1.94936	0	0	0	0	0	0	AAEL027966
LOC110674602	0.686563	0.375758	0.492162	1.73585	1.03126	1.35006	0.714326	0.74256	0.618152	0.470812	0.289869	0.79689	AAEL025119
LOC110674603	0	0.156683	0.0497133	0.132007	0.192118	0	0.195698	0	0.382189	0.526015	0.355473	0.0724445	AAEL021117
LOC110674604	0.998146	1.42216	0.386767	1.28376	1.45315	1.41319	0.422922	1.27284	0.84472	1.30608	0.790163	0.880649	AAEL026157
LOC110674605	0.318032	0	0.154041	0	0	0.281422	0.168441	0.337963	0	0.173394	0.314705	0	AAEL026455
LOC110674606	0	0	0.0362126	0	0	0	0	0.122786	0	0	0.0840704	0	AAEL024707
LOC110674607	0.0290318	0.232892	0.0827162	2.28766	1.86112	2.63547	1.59551	0.696875	1.17065	0.580996	1.10012	0.423389	AAEL021007
LOC110674608	1.26814	1.11554	0.988198	0.364119	0.800807	0.194696	0.468249	0.357097	0.545917	0.372965	0.698691	0.905325	AAEL024897
LOC110674609	0.693203	0.943023	0.578014	0.680608	0.954452	0.712792	0.804929	0.499801	1.49076	1.32423	0.354263	0.715343	AAEL021980
LOC110674611	0	0.059732	0	0.0169362	0.0254308	0	0.0220189	0.0428799	0	0.0186665	0.0205694	0.0151035	AAEL025602
LOC110674612	0.0600539	0.122235	0	0.118828	0.124899	0.159422	0	0	0	0.065484	0.118851	0	AAEL023091
LOC110674613	0.290091	0.166168	0.133598	0.156831	0.0329688	0.0238462	0.100749	0	0.368923	0	0.0705877	0.255943	AAEL026281
LOC110674614	0.022146	0.155117	0	0.154659	0.162561	0.246688	0.193189	0.139819	0.184663	0.071025	0.0825011	0.057468	AAEL023903
LOC110674615	0.0775538	0.0845651	0.153321	0.144843	0.101221	0.0539205	0.119034	0.126985	0.0100459	0.0673078	0.120595	0.0754066	AAEL027373
LOC110674616	3.0754	3.38027	1.90668	3.57814	4.09356	5.22504	2.47584	0.915079	3.12321	0.938974	1.58248	1.41096	AAEL020153
LOC110674618	1.70343	1.92265	0.629823	0.887666	0.193172	0.958318	1.47578	1.48052	0.687783	1.38347	1.74627	0.491682	AAEL022093
LOC110674619	0.596906	0.478535	0.447077	0.0325819	0.0682553	0.070021	0.287799	0.2372	0.224513	0.233418	0.159999	0.188864	AAEL025609
LOC110674620	0	0	0	0	0	0.231142	0.138347	0.310892	0	0	0	0	AAEL021039
LOC110674621	6.01972	5.9405	7.37926	7.23961	6.15813	11.5053	5.28221	6.89321	7.01242	4.23568	4.45303	6.79568	AAEL027509
LOC110674622	0.0470423	0.0478755	0.020051	0.0204781	0	0	0.0837151	0.0239954	0.0338396	0.0410366	0.0614461	0.0365241	AAEL025448
LOC110674623	0.192278	0.301051	0.286557	0.668727	0.153806	0.97767	0.587521	0.0943051	0.730686	0.338687	0.117087	0.339287	AAEL021764
LOC110674624	0.738096	0	0.238335	0	0	0	0	0.261451	0	1.07311	0.486916	0.434141	AAEL022395
LOC110674625	0	0	0	0	0	0	0	0.620571	0.411841	0	0	0.343487	AAEL026949
LOC110674626	0	0	0	0	0	0	0	0	0	0	0	0	AAEL027874
LOC110674627	1.82344	1.57773	2.49283	1.07242	1.00961	0.95149	1.64584	2.12446	1.77985	1.56333	1.3481	0.973256	AAEL023090
LOC110674628	0.0503858	0.0534148	0.321329	0.197319	0.115707	0.393839	0.111192	0.223098	0.111044	0	0	0.174114	AAEL027711
LOC110674629	0.0370458	0	0.0640835	0.21467	0.294431	0.412107	0.322341	0.224957	0.198746	0	0.128304	0.0396888	AAEL024037
LOC110674630	0.870332	0.442874	0.210776	0.430529	0.226263	0.192536	0.230479	1.61853	0.460345	0.71177	0.64592	1.15182	AAEL022158
LOC110674631	0	0	0	0.440915	0	0	0	0	0	0.24298	0	0.196601	AAEL021727
LOC110674632	0	0	0	0	0	0	0	0	0	0	0	0	AAEL026203
LOC110674633	0	0	0	0	0	0	0	0	0	0	0	0	AAEL025931
LOC110674634	0.124371	0	0.12048	0.123046	0	0	0.131743	0	0	0.135617	0	0	AAEL021464
LOC110674635	0.934751	0.0607218	0.175146	7.87057	5.29641	5.09247	0.637759	2.2422	4.52723	7.26108	6.58931	0.85024	AAEL024776
LOC110674636	0	0	0	0	0	0	0	0	0	0	0	0	AAEL028240
LOC110674637	0	0	0	0	0.340415	0.0579344	0	0	0	0	0	0	AAEL023619				GO:0004672,GO:0005524,GO:0006468	protein kinase activity,ATP binding,protein phosphorylation
LOC110674638	0	0.263944	0	0.0382966	0.0281773	0.195242	0.205017	0	0	0.0295464	0.0268129	0.239067	AAEL027051
LOC110674639	0.232786	0.118455	0	0.345459	0.36311	0.360481	0.30823	0.123688	0.369384	0	0.172763	0.154038	AAEL022444
LOC110674640	0.161032	0	0.155994	0	0	0	0	0	0.17035	0	0	0	AAEL020268
LOC110674641	0	0	0	0	0	0	0	0.175862	0	0	0	0.14601	AAEL024891
LOC110674642	0	0	0	0	0	0	0	0	0	0	0	0	AAEL025802
LOC110674643	0.446643	1.59094	0.216335	0.220942	0.696692	1.18568	0.709673	0.237317	0.708729	1.21757	1.98887	3.74363	AAEL022009
LOC110674644	0	0	0	0	0.236123	0	0	0	0	0	0	0	AAEL026885
LOC110674645	0	0.0492434	0	0	0	0	0	0	0	0	0	0	AAEL023328
LOC110674646	0.158289	0.0866089	0.0824391	0.122924	0.224781	0.030122	0.0360582	0	0.0594169	0.172601	0.0623163	0.21474	AAEL022899
LOC110674647	0.0988835	0.0867543	0	0.042168	0.118784	0.101078	0.0451484	0.105081	0	0	0	0.0752098	AAEL027208
LOC110674648	0.756285	0.849954	0.624753	1.32202	1.69836	1.11264	1.98557	0.690279	1.1289	2.2008	3.45721	2.81231	AAEL024080
LOC110674649	0	0	0	0.292234	0	0	0	0	0	0	0	0	AAEL020152
LOC110674650	0	0	0	0	0	0	0.0612399	0	0	0.0324755	0	0	AAEL023754
LOC110674651	0	0	0.419456	0	0	0	0.458667	0	0.152686	0.157385	0.285648	0.593422	AAEL027445
LOC110674654	0.0917069	0	0	0.18146	0	0	0	0.23389	0	0	0	0	AAEL028130
LOC110674655	0.0732134	0	0	0	0	0.0333743	0.0399514	0	0.0586739	0.0290303	0	0	AAEL023276
LOC110674656	0.0158094	0	0.139225	0.284381	0.149455	0.158971	0	0.0168002	0	0	0	0.0139484	AAEL025020
LOC110674657	1.02393	1.07388	0.700384	0.98982	1.14199	1.23805	1.44478	2.00592	2.30691	2.23302	2.33581	2.24815	AAEL020520
LOC110674658	0.295121	0.0475235	0.0597108	0	0.161217	0.0545436	0	0.0655022	0.164002	0	0.0462078	0.0543833	AAEL026301
LOC110674659	0	0	0	0	0	0	0	0	0	0	0	0	AAEL021380
LOC110674660	0	0	0	0	0	0	0.0411339	0	0.342327	0.0423435	0	0	AAEL025735
LOC110674661	0	0	0	0	0	0	0	0	0	0	0	0	AAEL021603
LOC110674662	17.9085	8.91475	14.5197	15.2141	15.9914	16.3637	12.1655	19.4445	15.65	10.1884	11.7499	13.7395	AAEL020106
LOC110674663	6.12116	4.04923	7.11559	4.23916	5.72882	7.3123	3.56618	5.8543	7.12287	2.33612	6.66283	8.64097	AAEL024608
LOC110674664	0	0	0	0	0	0	0	0	0	0	0	0	AAEL023157
LOC110674665	0.094716	0	0.0286268	0	0.0196989	0	0.0321055	0	0	0.020656	0	0.0133706	AAEL027496
LOC110674666	0.0137313	0.0597091	0.164457	0.166724	0.0155771	0.011046	0.0714032	0	0	0.0299457	0.0247047	0	AAEL021960
LOC110674667	0.0773297	0.0519416	0.374552	0.382529	0.160829	0.342139	0	0	0.163608	0	0	0	AAEL022300
LOC110674668	0.043798	0.162694	0.265173	0.225323	0.143467	0.172465	0.0881483	0.151264	0.120464	0.0907405	0.11485	0.139112	AAEL020548
LOC110674669	0.493259	0.501996	0.238913	0	0	0.545596	1.17561	1.17939	0.521799	0.941253	0.488098	1.08799	AAEL025243
LOC110674670	0.953457	0.765187	0.878766	0.436612	0.300281	0.658085	0.770461	1.23033	0.913526	0.736679	1.27505	0.797958	AAEL023320
LOC110674671	0.182973	0	0	0.0603413	0	0.0539701	0.129212	0.0324068	0	0	0	0.0269058	AAEL028157				GO:0003676	nucleic acid binding
LOC110674672	0.0737382	0.375222	0.285725	0.364763	0	0.391499	0	0	0	1.76892	0.145934	0.195174	AAEL026926
LOC110674673	0	0	0	0	0.049078	0	0	0	0	0	0	0	AAEL022951				GO:0005515	protein binding
LOC110674674	0.222053	0.816261	0.458605	0.657302	0.184729	0.124182	0.35282	0.219923	0.406848	0.571428	0.47901	0.292303	AAEL027586
LOC110674675	0	0	0	0	0.214113	0	0	0	0	0	0	0	AAEL024118
LOC110674676	0.42338	0	0.461401	0.314152	0.0550338	0.0468303	0	0.168718	0.0738998	0	0	0	AAEL020999
LOC110674677	1.88169	0.823459	1.06635	0	0	0.41627	0	1.49971	0.248821	0.36933	0	0.207523	AAEL023195
LOC110674678	0	0	0	0	0	0	0	0	0	0	0	0.0868702	AAEL021672
LOC110674679	0	0	0.174933	0.0879959	0.0924918	0.238499	0.0713752	0	0.0712802	0.0969858	0.133353	0	AAEL024311
LOC110674680	0	0.191154	0.14914	0.101544	0.0800492	0.166205	0	0.21814	0	0.111918	0.13508	0	AAEL024938
LOC110674681	0	0	0	0	0	0	0	0	0	0	0	0	AAEL027484
LOC110674682	0	0.0470585	0.111982	0	0.0444778	0.0429624	0.0306126	0.0859903	0.0244575	0.0630256	0	0.122389	AAEL021620
LOC110674683	0	0.0676996	0.0805502	0	0.0639869	0.0618068	0.04404	0.123708	0.123148	0.0453351	0.0822817	0.102709	AAEL024310
LOC110674684	0.0725795	0.0629221	0.0494766	0.163558	0.255776	0.168887	0.310372	0.12569	0.334131	0.0908668	0.0891102	0.195665	AAEL018003
LOC110674685	0.145993	0	0.130112	0.469422	0	0.151149	0	0	0.0386101	0.027063	0.288932	0.386423	AAEL025241
LOC110674686	0.349528	0	0.832604	3.02342	3.09447	1.52111	1.40005	2.33414	2.71151	2.86369	1.95237	3.38378	AAEL026703
LOC110674687	0	0.238274	0.226803	0	0.486935	0.207176	0.248004	0	0.743023	0.255297	0	0.206567	AAEL003257				GO:0036157,GO:0070286	outer dynein arm,axonemal dynein complex assembly
LOC110674688	0.199916	0.178981	0.120856	0.0743555	0.182882	0.043893	0.159222	0.34662	0.131978	0.109816	0.07437	0.0769187	AAEL025793
LOC110674689	0.0785249	0	0.0760682	0	0.163315	0	0	0	0	0	0.0777034	0.0692814	AAEL023145
LOC110674690	0	0.117982	0	0.0573466	0.241106	0.102583	0.0613997	0	0	0	0.0573578	0	AAEL024377				GO:0005515	protein binding
LOC110674691	0.259543	0	0.251424	0.128389	0.134949	0.229666	0	0	0.13728	0.141506	0.128414	0.457983	AAEL020715
LOC110674692	0	0	0	0	0	0	0	0	0	0	0	0	AAEL023033
LOC110674693	0.485683	0.651774	0.689929	0.766415	0.11342	0.179004	0.590504	0.398236	0.356987	0.362892	0.221391	0.414529	AAEL021768
LOC110674694	0.0381476	0	0	0	0	0	0	0.0614217	0	0	0	0	AAEL024209
LOC110674695	0	0	0	0	0	0	0	0	0	0	0	0	AAEL020607				GO:0000786,GO:0003677,GO:0046982	nucleosome,DNA binding,protein heterodimerization activity
LOC110674696	0.214672	0.291299	0.138637	1.06192	1.33941	1.2664	0.151597	0.304167	0	0	0.141617	0	AAEL020622
LOC110674697	0.0851016	0.058028	0.0618293	0.238271	0.12832	0.359958	0.14243	0.587827	0.112532	0.216216	0.143159	0.174945	AAEL027635
LOC110674698	0.151458	0.0936553	0.0371443	0	0	0.0525913	0.0629556	0.0346349	0.0344781	0.068988	0	0.0236812	AAEL024041
LOC110674699	0.0408405	0.249384	0.0791256	1.60329	1.51532	2.24063	2.03327	1.07111	2.26041	0.119349	0.202066	0.564997	AAEL026656
LOC110674700	0.153491	0.0531114	0.0743446	0.15793	0.159615	0.0380302	0.0455249	0.580674	0	0.083685	0.0759428	0	AAEL025307
LOC110674701	0.164157	0.121598	0.327101	0.457415	0.664457	0.845819	0.0275137	0.0220817	0.0439634	0.283228	0.390678	0.22275	AAEL020732
LOC110674702	0	0	0	0	0	0	0	0	0	0	0	0	AAEL025891
LOC110674703	0.515054	0.883125	0.732141	0.725578	0.154277	0.834741	0.447733	1.24042	0.906119	0.595201	0.71741	0.953304	AAEL021236
LOC110674704	0	0	0	0	0	0	0	0	0	0	0	0	AAEL023035				GO:0000786,GO:0003677,GO:0046982	nucleosome,DNA binding,protein heterodimerization activity
LOC110674705	0	0	0	0	0	0	0	0	0	0	0	0	AAEL026472
LOC110674706	2.1169	2.1544	0.341779	1.04717	1.46757	1.24881	1.12118	2.6245	1.11969	0.384719	2.79301	1.86771	AAEL021681
LOC110674707	0.189291	0.963218	0.366737	0.798536	0.366914	0.659282	0.694567	0.804615	0.828206	0.412813	1.26172	0.611919	AAEL025387
LOC110674708	0.350989	0.357206	0.297507	0.56428	0.547487	0.0776461	0.836532	1.2122	0.556946	0.76545	0.824877	0.696762	AAEL027035				GO:0003677,GO:0003700,GO:0006355,GO:0043565,GO:0045944	DNA binding,DNA-binding transcription factor activity,regulation of transcription, DNA-templated,sequence-specific DNA binding,positive regulation of transcription by RNA polymerase II
LOC110674709	7.8818	8.49835	6.43834	6.1118	6.37977	6.89908	6.94994	7.33444	6.89562	8.96612	6.6189	6.95399	AAEL022538	Putative bisphosphate 3'-nucleotidase bpnt1/inositol polyphosphate 1-phosphatase [Source:UniProtKB/TrEMBL;Acc:A0A0P6IYC3]			GO:0046854,GO:0046855	phosphatidylinositol phosphorylation,inositol phosphate dephosphorylation
LOC110674710	1.24798	1.0103	0.803669	0.471425	0.275776	0.596082	0.851005	1.35633	0.999895	1.01134	1.07705	0.531769	AAEL025548
LOC110674711	0.109025	0	0	0.119369	0.0211632	0	0	0	0.153778	0.0269468	0	0	AAEL021855
LOC110674712	0.852115	0.739019	0.586336	0.133815	0.123071	0.0284255	0.307141	0.3764	0.321935	0.335531	0.29696	0.343833	AAEL025713
LOC110674713	0.476322	0.429393	0.333183	0.0532245	0.0628584	0.0625816	0.228586	0.194633	0.0735361	0.146326	0.113049	0.150395	AAEL026394
LOC110674714	0	0	0	0.352732	0.370754	0.315489	1.13299	0.378875	0.75432	0	0.352801	0	AAEL023318
LOC110674715	4.99341	4.79742	5.48664	4.78102	5.11244	6.9399	5.08963	5.98139	5.47293	4.22635	4.63019	4.66439	AAEL027748
LOC110674716	0.240454	0	0.247959	0	0	0	0	0.272009	0	0.845793	0.253289	0.171088	AAEL020295
LOC110674717	0.249047	0	0.482511	0	0	0.220378	0.263808	0.132328	0.263457	0	0.246442	0.219731	AAEL025124
LOC110674718	15.1129	18.5942	18.5816	10.9263	15.7321	15.4166	14.7439	12.1869	11.6332	9.59298	9.38947	13.9853	AAEL020230
LOC110674719	0.107185	0.0545417	0.103832	0	0	0.11097	0.113538	0.170853	0.34016	0	0.035001	0	AAEL024873
LOC110674720	0	0	0	0	0	0	0	0	0	0	0	0	AAEL021226
LOC110674721	0	0	0	0	0	0	0	0	0	0	0	0	AAEL025726
LOC110674722	0.323509	0.658479	0.747858	0.865623	1.52916	1.09302	0.588792	1.50171	0.22867	0.440951	0.109133	0.642211	AAEL022464
LOC110674723	0.0494218	0.100594	0	1.41796	1.31978	2.0117	1.27318	1.40121	1.7943	0.144427	0.0489048	0.596504	AAEL027070
LOC110674724	0.309319	0.236098	0.149821	0.306023	0.160829	0.639116	0.217889	0.218588	0.109618	0.168644	0.153041	0.500785	AAEL023568
LOC110674725	0.889099	2.1782	0.305902	1.43503	1.19165	1.14877	1.47402	4.30053	3.34052	1.88771	4.53647	2.06356	AAEL028222
LOC110674726	0.725795	0.527608	0.301323	0.15387	0.269553	0.229373	0.329491	0.550915	0.164526	0.452241	0.410401	0.411659	AAEL023562
LOC110674727	1.92126	2.32403	2.66415	1.19708	0.970449	0.589175	2.09886	2.45511	2.16113	1.71593	1.5704	2.07965	AAEL028219
LOC110674728	1.60123	1.86724	0.872512	0.726077	1.04069	1.35786	1.7668	1.55978	1.09396	1.70964	1.48545	1.4716	AAEL024733
LOC110674729	0	0	0.568973	0.290545	0.30539	0.519735	0	0	0.310666	0.960684	0.581203	0	AAEL021157
LOC110674730	0	0	0	0	0	0	0	0	0.0819212	0.255887	0.348319	0	AAEL024531
LOC110674731	16.8352	8.50303	10.3957	22.5707	7.69986	14.3659	29.289	38.0931	38.5029	12.2201	15.1986	45.443
LOC110674732	15.2439	15.2855	18.1306	16.0513	14.315	19.1112	16.3615	21.6865	19.3953	18.4407	16.5729	16.7673	AAEL025436
LOC110674733	0	0	0.0833466	0.0851216	0.100207	0.076134	0.182276	0	0.0910166	0	0	0.0759103	AAEL022943
LOC110674734	0.0311344	0.100819	0.159027	0.207218	0.100073	0.0951738	0.0629613	0	0.0928192	0	0.100828	0.0499443	AAEL026500
LOC110674735	3.62035	2.5382	3.03948	2.38785	2.92816	3.45276	5.24107	3.97549	4.5958	4.34248	2.74657	3.65557	AAEL024086				GO:0003677,GO:0006355	DNA binding,regulation of transcription, DNA-templated
LOC110674736	3.63465	3.38208	2.15489	1.51304	1.04674	1.30056	2.16025	2.69062	3.20791	2.05052	3.07226	3.20119	AAEL027542
LOC110674737	0.0956792	0.0486869	0.1622	0.165654	0.149244	0.148164	0.0760125	0.177932	0.0253038	0	0.0473391	0.0633122	AAEL025623
LOC110674738	0.274926	0.544468	0.253729	0.327131	0.226011	0.202184	0.419122	0.840936	0.762456	0.97025	1.34738	0.0983365	AAEL022760
LOC110674739	8.13183	5.14446	7.66452	7.39288	10.5132	9.46466	10.1658	12.1448	11.3148	8.70734	12.6863	9.76003	AAEL026468				GO:0003677,GO:0006351,GO:0042025	DNA binding,transcription, DNA-templated,host cell nucleus
LOC110674740	0	0.0881595	0	0.0282817	0	0.0252956	0.0183519	0	0.0229093	0.0160578	0.0145722	0	AAEL024855
LOC110674741	0.19635	0.324721	0.546846	0.169976	0.0510458	0.347495	0.129992	0.13041	0.233675	0.0535261	0.048574	0.0866184	AAEL023649
LOC110674742	0.359262	0.121875	0.522033	0.355434	0.43586	0.423874	0.253704	0.636295	0.760099	0.195873	0.296253	0.581114	AAEL028030
LOC110674743	0.386084	0.394878	0.839187	0.815251	0.63319	0.39773	0.21364	0.673595	0.268219	0.152898	0.275605	0.199976	AAEL022777
LOC110674744	0	0.0981273	0	0.0472884	0.0214244	0.0182308	0	0.0288996	0	0.0449306	0	0	AAEL027128				GO:0003677	DNA binding
LOC110674745	133.578	443.295	155.706	207.196	345.655	171.434	262.56	76.6366	83.5192	452.952	214.888	191.082	AAEL017987
LOC110674746	0.130606	0.0225963	0	0.0930342	0.28793	0.071654	0.0193685	0.253987	0.0193428	0.0598143	0.1189	0.0772051	AAEL020058
LOC110674747	5.35328	6.88722	5.08795	0	0.210069	0.357512	6.63349	7.04764	4.91508	9.36174	5.29727	1.51496	AAEL028085
LOC110674748	0.952411	1.01039	0.951211	0.910752	0.646269	0.703228	0.84922	1.0187	0.778239	0.623456	0.945522	0.420149	AAEL022586
LOC110674749	19.1334	28.9721	20.4692	20.8133	20.9108	21.4101	27.6955	24.5273	23.7285	38.891	33.271	20.9375	AAEL027190
LOC110674750	0.0468687	0.244218	0.0363219	0.272651	0.0487384	0.313539	0	0.0776973	0.0218154	0	0.185513	0.0363893	AAEL020939
LOC110674751	1.27014	0.775583	0.369121	0.460756	2.24538	1.16139	2.60115	2.15959	1.8363	2.03131	1.08927	0.298834	AAEL021597
LOC110674752	0	0	0	0.0791281	0.0405053	0.0363058	0.0321829	0.0137975	0.0296677	0.0235019	0	0	AAEL024194
LOC110674753	0.0434864	0.03927	0.0266995	0.00848343	0	0.0791289	0.0382784	0.0110648	0.0388754	0.00935012	0	0.0502559	AAEL026599
LOC110674754	0	0.018851	0.0140984	0.0942456	0.0151343	0	0.0280296	0.0435854	0.0153958	0	0	0	AAEL020868
LOC110674755	0.868768	0.876146	0.93858	0.706382	0.829315	0.701826	0.681742	0.595187	0.801092	0.836713	0.691377	0.508043	AAEL027428
LOC110674756	0.0131111	0	0	0	0	0.00986156	0	0	0.0464637	0	0	0	AAEL021770
LOC110674757	0.670452	0.272134	0.293781	0.380692	0.233982	0.386666	0.126425	0.302869	0.289769	0.40394	0.55308	0.267569	AAEL024248
LOC110674758	0.0586219	0	0.0292544	0	0.144089	0.0707367	0.0225805	0.0943875	0.0695306	0.0639225	0.0878918	0.2445	AAEL026699
LOC110674759	0	0	0.0385322	0.139524	0	0.021332	0.105974	0.0422695	0.0956322	0.065717	0.128816	0	AAEL023136
LOC110674760	50.1338	39.1424	61.5812	59.5694	55.4522	69.1819	51.682	67.3755	66.6264	55.491	53.6811	49.641	AAEL021736	Enhancer of rudimentary homolog [Source:UniProtKB/Swiss-Prot;Acc:Q93104]			GO:0006221,GO:0007049,GO:0045747	pyrimidine nucleotide biosynthetic process,cell cycle,positive regulation of Notch signaling pathway
LOC110674761	2.50441	3.43252	3.94997	2.30342	2.56506	3.10702	2.74617	1.56472	1.69077	4.29528	3.46203	1.74326	AAEL024258
LOC110674762	4.81558	2.65219	3.86009	5.20778	2.9524	2.43826	3.49915	3.59931	5.39139	2.82429	2.82521	2.2852	AAEL022710
LOC110674763	0.0205969	0	0.0151155	0.0308749	0.0214186	0.0596483	0.0218177	0.0716325	0.0495196	0.0224592	0.0463213	0.0473581	AAEL018005				GO:0046872	metal ion binding
LOC110674764	0.0899215	0.183028	0	0.177927	0.561053	0.278495	0.142877	0.0955569	0.0951244	0.196104	0.133471	0.0396682	AAEL024049
LOC110674765	0.353802	1.0957	0.569303	0.165283	0.2382	0.262811	0.203313	0.57205	0.137456	0.242891	0.312262	0.196529	AAEL026649				GO:0003676,GO:0003677	nucleic acid binding,DNA binding
LOC110674766	3.49523	4.3702	3.57936	2.84049	4.23179	3.79982	3.25281	2.94489	2.7863	3.15791	4.10098	2.18068	AAEL024429				GO:0003676	nucleic acid binding
LOC110674767	0.255967	0.382068	0.55603	0.396743	0.369424	0.560763	0.455184	0.647876	0.74669	0.4322	0.328509	0.220361	AAEL027538
LOC110674768	0.0456065	0	0	0	0	0	0	0.193859	0	0	0.0451294	0	AAEL025291
LOC110674769	0.0869044	0.0204101	0.179704	0.0892853	0	0.0354925	0.162867	0	0.0194473	0.253307	0.0942639	0.0324392	AAEL021719
LOC110674770	1.36251	0.646319	0.63198	0.605456	0.174107	0.526203	0.758329	0.926413	0.983295	0.893946	1.06261	1.28363	AAEL022275
LOC110674771	0.277626	0.395562	0.322729	0.0549337	0.0577404	0.0614168	0.646979	0.107979	0.29369	0.605459	0.329666	0.26944	AAEL026743
LOC110674772	9.88116	8.51051	10.3077	11.6496	11.8262	14.3947	10.2439	12.1338	11.3917	9.65725	9.32511	8.75029	AAEL021318				GO:0005515	protein binding
LOC110674773	0.1079	0.345122	0.209049	0.0152501	0.176322	0.0818394	0.0489838	0.0435717	0.0326124	0.0336162	0.0457592	0.0271997	AAEL019943				GO:0000166,GO:0003676,GO:0004386,GO:0005524	nucleotide binding,nucleic acid binding,helicase activity,ATP binding
LOC110674774	5.93653	5.47966	3.47723	3.14152	4.73769	6.1083	5.26469	5.96527	4.16234	5.7206	6.28426	2.31434	AAEL020454
LOC110674775	8.82339	8.59345	8.70052	9.01097	10.8197	9.05299	7.97287	8.97307	7.72808	8.10387	6.66566	8.95664
LOC110674776	6.46005	12.875	18.6435	1.3315	0.139954	4.16821	4.98964	4.00453	4.55589	2.49481	2.79671	10.6868	AAEL026955
LOC110674777	0	0	0	0.241476	0.199347	0.417128	0	0	0	0	0.155487	0	AAEL022315
LOC110674778	0.446486	0.0144929	0.171222	0.165752	0.36325	0.323928	0.281285	0.207413	0.354462	0.0913429	0.248677	0.147815	AAEL027848
LOC110674779	0.091852	0.116849	0.181664	0	0.177103	0.132077	0.083107	0.392467	0.226722	0.24622	0.221547	0.0861046	AAEL023238
LOC110674780	0.0578133	0.035659	0	0	0.0601197	0.0263542	0.0575284	0.0930856	0	0.0630408	0.0554749	0	AAEL022108
LOC110674781	6.74329	3.67494	11.82	6.39728	4.32266	8.56786	4.74122	3.23938	3.75773	3.06757	4.11334	10.1505	AAEL024472
LOC110674782	5.72688	7.24377	5.75853	5.50398	6.46581	7.02229	8.75283	9.70771	9.08737	10.616	9.95767	11.2359	AAEL025637
LOC110674783	0	0	0.101372	0.0517655	0.326462	0.0462998	0	0.0122325	0.0553505	0	0	0	AAEL022083
LOC110674784	0.0278256	0.0302714	0.0650638	2.35611	2.4715	3.47261	0.106719	0.186593	0.208079	0.106719	0.17755	0.187088	AAEL023705
LOC110674785	0	0	0	0	0	0	0	0.0823641	0	0	0	0	AAEL026246				GO:0003676	nucleic acid binding
LOC110674786	0.301965	0.614628	0.292518	0	0.785029	1.60323	0.639725	0.320889	0.958311	1.48171	1.34463	2.66419	AAEL027257
LOC110674787	0.720027	0.0684842	0.511718	0.266301	0.111963	0.595458	0.245918	0.650736	0.373726	0.741105	0.472776	0.406691	AAEL023940
LOC110674788	0	0	0	0	0	0	0	0	0	0	0	0	AAEL024606
LOC110674789	53.2011	542.963	252.835	149.979	185.601	143.508	131.418	0.45593	9.07732	128.421	40.3325	14.6367	AAEL021022
LOC110674790	0.384475	0.305368	0.179326	0.603775	0.346928	0.398719	0.204709	0.376144	0.158169	0.157492	0.133863	0.239605	AAEL025863
LOC110674791	0	0	0	0.0437658	0.016728	0.206399	0.0340793	0.0470095	0	0.016079	0	0	AAEL021254
LOC110674792	1.92243	1.51518	1.08167	0.981351	1.22502	0.877734	1.24784	2.38899	2.57505	1.04508	1.30013	2.20349	AAEL024997				GO:0003677	DNA binding
LOC110674793	3.78066	2.14853	3.5095	1.82294	2.44728	2.15598	2.34624	5.1018	3.71531	1.23026	4.02604	3.08401	AAEL028091
LOC110674794	0.0322064	0.0163884	0.0623977	0.0477949	0.0502369	0	0.0511729	0	0.017035	0.0351185	0.0318695	0.0284152	AAEL023598				GO:0004803,GO:0006313	transposase activity,transposition, DNA-mediated
LOC110674795	9.00494	9.617	7.32319	9.51392	9.7688	9.68988	9.95082	9.86463	8.93795	8.42508	9.46077	9.31812	AAEL027287				GO:0005759,GO:0006974,GO:1902445	mitochondrial matrix,cellular response to DNA damage stimulus,regulation of mitochondrial membrane permeability involved in programmed necrotic cell death
LOC110674796	66.4033	71.6632	52.1629	61.1496	65.3507	45.8734	78.7715	80.5374	78.7352	76.0067	76.8521	78.6865	AAEL022712				GO:0005840,GO:0006412	ribosome,translation
LOC110674797	3.23978	3.52197	3.56639	4.00658	3.06275	3.38807	4.28975	5.32072	5.06296	4.09474	4.22594	3.50805	AAEL026758
LOC110674798	0	0	0	0	0	0.0246853	0	0	0.0894265	0	0.0836508	0	AAEL022119
LOC110674799	0.0449842	0	0	0	0	0.112393	0	0.0337435	0	0.0577078	0	0.0396888	AAEL025601
LOC110674800	0.55114	1.11088	0.482555	0.454228	0.560278	0.37318	0.33995	0.874546	0.674869	1.18032	0.788298	0.606465	AAEL025449
LOC110674801	11.8438	8.89468	15.113	13.8186	13.1656	18.5755	11.6805	12.3256	13.0475	10.5099	8.16348	9.51271	AAEL022060
LOC110674802	0.688715	0.727844	0.669265	0.260603	0.465286	0.285878	0.609007	0.572106	0.640516	0.574979	0.407525	0.517228	AAEL022233
LOC110674803	0.633271	0.975521	0.613459	0.59235	0.449001	0.10698	1.10378	0.902377	1.62911	0.762724	0.413017	0.655233	AAEL026728
LOC110674804	0.107411	0.109314	0.545228	0.159401	0.223393	0.167282	0.416427	0.342429	0.113626	0.384165	0.501678	0.0947675	AAEL020161
LOC110674805	0.107185	0.181078	0.544077	0.159064	0.222922	0.166929	0.340613	0.227804	0.226773	0.149602	0.288493	0.37827	AAEL024933
LOC110674806	0.0578752	0.0283318	0.161097	0.263099	0.324537	0.281347	0.211077	0.390033	0.186772	0.069499	0.086992	0.106003	AAEL021078
LOC110674807	0.0569873	0.0373538	0.11883	0.331592	0.341503	0.339315	0.269084	0.432123	0.194137	0.0705659	0.114694	0.126124	AAEL025780
LOC110674808	18.6533	13.4884	22.8249	15.2978	11.9958	15.6373	11.1794	15.3884	15.0591	19.0017	12.8721	12.9928	AAEL022090
LOC110674809	0.0706861	0.0606978	0.12839	0.10927	0.0229706	0.0527757	0.0725358	0.0680739	0.119174	0.0409474	0.18361	0.0331316	AAEL022440
LOC110674810	0.29261	0.300903	0.407051	0.526075	0.423454	0.360333	0.379551	0.473323	0.673231	0.391545	0.330373	0.449599	AAEL023630
LOC110674811	4.19653	4.36047	5.55793	4.73373	3.63143	6.22076	3.451	4.69345	4.6424	4.51837	3.8041	4.99834	AAEL028126
LOC110674812	0.268742	0.368437	0.584139	0.128545	0.184769	0.139539	0.372895	0.22776	0.223205	0.248238	0.58241	0.36056	AAEL024769
LOC110674813	12.7379	10.1102	15.016	11.5706	10.9794	15.3938	12.5229	13.3667	12.0719	9.92242	10.4423	9.49404	AAEL021103				GO:0005634	nucleus
LOC110674814	21.1738	29.9503	17.5091	22.5817	18.0727	21.2739	23.2572	22.2238	17.6495	26.0466	22.2995	20.2147	AAEL023395
LOC110674815	12.3032	12.4272	10.6885	8.99779	7.29717	9.61359	11.7854	9.51749	8.61976	9.8833	9.98173	11.1197	AAEL026819
LOC110674816	0.045484	0.0925793	0	0	0	0.0402481	0.0963597	0	0	0	0	0	AAEL025035
LOC110674817	0	0	0	0	0	0	0	0	0	0	0	0	AAEL020321
LOC110674818	0	0	0	0	0	0	0	0.0752994	0	0.154531	0	0	AAEL021121
LOC110674819	1.59819	1.28408	0.65187	0.998629	1.31206	1.19092	0.623706	1.25142	0.800841	0.550326	0.499412	0.667923	AAEL024862
LOC110674820	0	0.0772878	0.172146	0	0.184795	0.0940807	0	0.0532633	0.0530223	0.0414047	0.0150296	0.0911241	AAEL024804
LOC110674821	0.0482479	0.0343126	0	0	0	0.0473233	0	0	0	0	0	0.0256436	AAEL020190
LOC110674822	0.029065	0.0343126	0	0	0	0.0473233	0	0	0	0	0	0.0256436	AAEL025892
LOC110674823	82.8201	70.1212	56.4397	74.3636	82.0919	75.1338	82.9896	99.9495	105.597	71.8784	64.4414	78.8605	AAEL021179				GO:0006144,GO:0033971	purine nucleobase metabolic process,hydroxyisourate hydrolase activity
LOC110674824	1.01106	1.17188	1.07682	0.900256	0.831184	1.12132	0.416493	0.626746	0.779589	1.28622	0.73035	0.923758	AAEL027083
LOC110674825	0.0224921	0.105027	0.0858719	0.108644	0.0454029	0.117076	0.229843	0.0168718	0	0.0476089	0.15187	0	AAEL022448
LOC110674826	0.0176297	0.244663	0.077628	0.158562	0	0.0354551	0	0.189049	0.169544	0	0	0.0155544	AAEL028232
LOC110674827	0.55387	0.528886	0.45043	0.270602	0.526191	0.375147	0.608428	0.63218	0.434013	0.507021	0.527777	0.428342	AAEL014853	otoferlin [Source:VB Community Annotation]			GO:0005509,GO:0016021,GO:0016079	calcium ion binding,integral component of membrane,synaptic vesicle exocytosis
LOC110674828	0.0313228	0.0255021	0	0.123956	0.13029	0.0110868	0.0331793	0	0	0	0.0173573	0.0221085	AAEL026305
LOC110674829	0.356421	0.138412	0.162035	0.541308	0.289359	0.509053	0.149031	0.245861	0.160409	0.127845	0.128392	0.195851	AAEL022862
LOC110674830	1.02257	1.04068	0.573493	0.745445	1.0074	1.00011	0.684113	0.972271	0.910937	1.17372	1.27816	0.902199	AAEL021231				GO:0003924,GO:0005525	GTPase activity,GTP binding
LOC110674831	0.0611012	0.0621835	0.177569	0.1209	0.127077	0.162202	0.129445	0.194791	0.258546	0.0666259	0.120924	0.215635	AAEL026915				GO:0004553,GO:0005975	hydrolase activity, hydrolyzing O-glycosyl compounds,carbohydrate metabolic process
LOC110674832	0	0.200021	0	0	0	0.173915	0	0	0	0	0	0	AAEL022638	Putative 14.5 kDa salivary protein [Source:UniProtKB/TrEMBL;Acc:Q1HRF3]
LOC110674833	17.5772	17.2352	16.7015	18.8476	17.134	17.312	20.1732	24.1073	21.9573	19.8998	23.5338	18.5881	AAEL028087
LOC110674834	4.87544	3.44905	4.20454	5.70584	5.68822	5.6295	4.92823	6.06554	6.55699	4.34378	4.88327	3.72449	AAEL028129	Nuclear transcription factor Y subunit gamma [Source:UniProtKB/TrEMBL;Acc:A0A0P6K0W4]			GO:0000786,GO:0003677,GO:0003700,GO:0006355,GO:0016602,GO:0046982	nucleosome,DNA binding,DNA-binding transcription factor activity,regulation of transcription, DNA-templated,CCAAT-binding factor complex,protein heterodimerization activity
LOC110674835	0.264973	0.122718	0.0513366	0.325217	0.13258	0.263694	0.295322	0.13222	0.185245	0.176709	0.12388	0.262919	AAEL023628
LOC110674836	4.56057	4.04246	6.32536	6.06822	6.7666	8.21135	4.32741	5.84452	4.50122	6.47839	4.58004	3.51451	AAEL020033				GO:0003676	nucleic acid binding
LOC110674837	0.82302	0.998674	0.275978	0.657664	1.58004	0.896341	0.938861	0.672768	0.669723	0.96647	1.51919	0.642353	AAEL025763
LOC110674838	0.510243	0.556372	0.776726	0.973555	1.0233	1.51577	0.386061	0.852061	0.346993	0.357672	0.54097	0.22509	AAEL028002				GO:0003677,GO:0006355	DNA binding,regulation of transcription, DNA-templated
LOC110674839	10.1935	10.8132	12.0167	11.5256	12.5631	12.9335	9.76931	8.65439	10.2127	10.5859	11.6879	9.1839	AAEL022443				GO:0004672,GO:0005524,GO:0006468,GO:0006914,GO:0016301,GO:0016310	protein kinase activity,ATP binding,protein phosphorylation,autophagy,kinase activity,phosphorylation
LOC110674840	0.348382	0.236368	0.224988	0.459559	0.845319	0.411036	0	0	0.245693	0	0	0	AAEL021654
LOC110674841	0	0	0	0	0	0	0	0	0	0	0	0	AAEL025315
LOC110674842	0.0501042	0	0	0.198281	0	0.177346	0.0297214	0.0362061	0.0424026	0.546346	0	0	AAEL027112
LOC110674843	4.99372	4.19831	3.26004	3.65168	2.93514	3.45824	5.63467	4.03769	4.8233	2.841	1.93362	3.63964	AAEL022603
LOC110674844	0	0	0.535821	0.0689107	0.136342	0.271918	0	0	0	0	0.709514	0	AAEL022481
LOC110674845	0.367434	0.24237	0.479345	0.179889	0.124219	0.333833	0.0404427	0.0863674	0.114769	0.109645	0.236034	0.0483603	AAEL028024
LOC110674846	0.31902	0.0705521	0.368111	0.261006	0.0767623	0.11928	0.246817	0.353337	0.348343	0.211379	0.154348	0.318278	AAEL023663
LOC110674847	0	0	0	0	0	0	0	0	0.0722383	0	0	0	AAEL025107
LOC110674848	1.882	0.921361	1.01543	0.233528	0.104284	0.306378	0.415462	0.5499	0.264166	0.319841	1.00332	0.0979209	AAEL024777				GO:0005515	protein binding
LOC110674849	5.93988	2.61873	4.91963	1.99296	0.682123	1.79768	1.49266	1.1038	0.893099	0.715265	1.32664	0.457916	AAEL020094
LOC110674850	0.724916	0.534358	0.989054	0.535747	0.238489	0.763903	0.166873	0.304833	0.313594	0.261713	0.574689	0.116172	AAEL023728				GO:0005515	protein binding
LOC110674851	1.54593	0.825826	0.942289	0.297088	0.192706	0.307418	0.223084	0.379022	0.297927	0.140439	0.433206	0.0559627	AAEL027338				GO:0005515	protein binding
LOC110674852	0.714069	0.46076	0.675701	0.549345	0.316118	0.606175	0.0625458	0.109807	0.122523	0.225702	0.446881	0.061112	AAEL021467				GO:0005515	protein binding
LOC110674853	0.106694	0.372362	0.472904	0.772263	0.314535	0.609226	0.0463801	0.0903839	0.112868	0.394025	0.368029	0.0999072	AAEL025085				GO:0005515	protein binding
LOC110674854	0.00877039	0.0197641	0.00849601	0	0	0.00942381	0.00929021	0.0113172	0.0132541	0.0778735	0.00867864	0	AAEL024103				GO:0004519,GO:0090305	endonuclease activity,nucleic acid phosphodiester bond hydrolysis
LOC110674855	1.52177	0.798824	1.38854	0.390028	0.181157	0.357355	0.30331	0.345906	0.354662	0.220488	0.818266	0.0764758	AAEL026630				GO:0005515	protein binding
LOC110674856	1.01291	0.83838	0.552711	1.19873	0.79332	1.69334	0.0577216	0.497318	0.0576448	0.989151	0.412343	0.415727	AAEL020086
LOC110674857	1.37681	0.452144	0.575254	1.01399	0.146376	0.225759	0	0.588978	0	0.0575579	0.0870547	0.0970239	AAEL024822
LOC110674858	1.38151	0.978075	0.969776	1.6243	0.942135	2.09062	0.0901366	0.574471	0.0900168	1.43002	0.430921	0.68452	AAEL021747
LOC110674859	1.40153	0.601746	1.55285	2.07557	0.719614	1.2402	0.403627	0.265294	0.416989	0.334307	0.823455	0.231854	AAEL024403
LOC110674860	45.0962	78.3144	32.239	24.8232	76.9466	16.0114	91.9845	47.3622	44.8315	43.4495	50.3705	73.3859	AAEL027311
LOC110674861	5.19408	25.4327	29.3231	53.1059	54.6567	34.5065	10.8217	0.639688	1.5283	32.341	19.4187	5.99387	AAEL022681
LOC110674862	13.0295	14.5853	14.033	15.092	17.3556	18.2057	14.8304	15.6605	14.2124	13.8411	13.5426	14.6263	AAEL020203				GO:0005515,GO:0008013,GO:0016055,GO:0030178	protein binding,beta-catenin binding,Wnt signaling pathway,negative regulation of Wnt signaling pathway
LOC110674863	0	0.0450593	0.0364564	0.186164	0.0920827	0.0783566	0.124283	0.0282299	0	0.0482784	0	0.136721	AAEL023806
LOC110674864	0.733655	0.373325	0.533027	0.544379	0.190731	0.3246	0.582854	0.389817	0.970132	0.799992	0.36299	0.48547	AAEL020864
LOC110674865	0	0	0.0612141	0.750214	0.197136	0.204656	0.200809	0.0671513	0.110967	0.13781	0.37518	0.22301	AAEL024431
LOC110674866	0.411938	0.601724	0.766802	0.491455	0.388054	0.407402	0.235288	0.274669	0.290515	0.0880755	0.115894	0.26724	AAEL022389
LOC110674867	0	0.0183725	0.0149897	0	0	0	0.03005	0	0	0	0.0153119	0	AAEL025506
LOC110674868	0	0.018851	0.01538	0	0	0	0.0308326	0	0	0	0.0157107	0	AAEL025090
LOC110674869	0	0	0.0410819	0	0	0.0255182	0.0179689	0	0	0.0924866	0.0142681	0	AAEL020503
LOC110674870	0.0776029	0.320846	0.263113	0.359888	0.557326	0.63734	0.256882	0	0.12827	0.469639	0.126705	0.219097	AAEL025184
LOC110674871	0.0236472	0.0488614	0	0.0474994	0	0.0424842	0.0819778	0	0.0250154	0.0257854	0.0233998	0.0423593	AAEL021514
LOC110674872	0.213136	0.731444	0.480158	0.573749	0.221639	0.425448	0.0525043	0.384512	0.330337	0.740461	0.161858	0.376093	AAEL028131
LOC110674873	5.05236	6.36155	3.71056	3.18511	7.68539	4.86585	2.68835	2.24749	2.51077	3.15177	2.76717	5.57721	AAEL023750
LOC110674874	0.355639	0.413644	0.541378	0.201057	0.528325	0.0449571	0.376718	0.647876	0.322472	0.443196	0.502741	0.26895	AAEL022336
LOC110674875	0.288668	0.514118	0.279637	1.49936	0.525323	0.574736	0.0764444	0.0766898	0.0763428	0.629539	0.499885	0.254688	AAEL026742
LOC110674876	0.0216194	0.0440047	0	0.0395698	0.0415915	0.0353918	0	0.0229743	0.0457407	0.0235742	0	0.0190745	AAEL025493
LOC110674877	0.895254	0.607407	1.15633	1.55	0.465484	1.05626	1.02734	1.03064	0.631369	0.976202	1.62413	0.394934	AAEL021973
LOC110674878	0.138191	0.193586	0.111819	0.985985	0.600177	0.690541	0.525253	0.171039	0.11351	3.72107	0.926652	0.651218	AAEL025943
LOC110674879	0	0	0	0	0.0278799	0.0237241	0	0	0	0.032158	0.108772	0.118272	AAEL021412
LOC110674880	2.26301	0.649882	1.99144	1.38989	1.57041	1.55739	2.51343	2.38697	1.94005	2.20743	1.91341	2.5274	AAEL024432
LOC110674881	2.95952	2.04831	2.9763	1.14528	1.43235	2.02474	2.19254	2.0844	2.20236	2.73961	2.21206	2.61911	AAEL021234
LOC110674882	3.21524	1.12903	3.17012	2.14332	2.41277	2.49183	3.90151	3.96446	3.32684	3.54164	3.06178	3.80399	AAEL023911
LOC110674883	0	0	0	0	0	0.0102175	0	0	0	0	0	0	AAEL020065
LOC110675039	0.263718	0.220435	0.137673	0.585728	0.463124	0.443855	0.384809	0.501534	0.51454	0.586729	0.652774	0.291681	AAEL026026
LOC110675050	0.135	0.11804	0.0854652	0.34124	0.255462	0.338861	0.205842	0.284496	0.257865	0.335051	0.336039	0.157357	AAEL028245
LOC110675094	0.332063	0.150949	0.733417	0.256249	0.363727	0.456427	3.38144	2.19487	2.61584	4.08435	1.82476	1.79105	AAEL027725
LOC110675095	0.0529225	0.0239377	0.0945588	0.200126	0.0953919	0.501605	0.143263	0.147472	0.13934	0.365483	0.101246	0.0601818	AAEL023772
LOC110675096	0.236856	0.144631	0.0458892	0.0585831	0.110837	0.104795	0	0.062925	0.0501122	0	0.117189	0.0940385	AAEL021884
LOC110675097	0.0572136	0	0.0554236	0.169812	0	0	0	0.0948467	0.060524	0.0823506	0.131347	0.11711	AAEL026557
LOC110675098	0	0	0	0	0	0	0	0	0	0	0	0	AAEL021295
LOC110675099	0.358059	0.122561	0.138534	0	0.279537	0.316841	0.231213	0	0.113747	0	0	0	AAEL025864
LOC110675100	0.247624	0.26939	0	0.667375	0.29302	0.23423	0.407018	0.671468	0.849085	0	0	0.128072	AAEL020567
LOC110675101	108.085	670.113	464.838	142.959	652.261	143.822	236.574	0.982747	19.4437	125.925	39.6931	224.278	AAEL025320
LOC110675102	105.26	473.426	484.563	115.328	1252.2	135.113	270.147	14.5394	36.0875	7.95684	15.344	1079.99	AAEL021701
LOC110675103	0.0756036	0	0.244616	0.0493667	0.157239	0	0	0	0.0527856	0.0544102	0.100249	0	AAEL023134
LOC110675104	0	0	0	0	0	0	0	0	0	0	0	0	AAEL025441
LOC110675105	0.319532	0.081298	0.0510734	0	0	0.0706873	0.321547	0.373513	0.380273	0.116722	0.0537522	0.152236	AAEL024033
LOC110675106	0	0	0	0	0	0	0.0833079	0	0	0	0	0	AAEL026356
LOC110675107	0.117879	0.200344	0.323159	0	0.469486	0.0344219	0.540666	0.354503	0.249398	0.385611	0.388429	0.364008	AAEL020759
LOC110675108	0.249864	0.0565088	0.0355002	0	0	0.0491335	0.223502	0.259622	0.264321	0.0811315	0.0373622	0.105816	AAEL023298
LOC110675110	82.1324	445.526	332.063	154.965	821.722	145.178	300.636	6.18854	25.7043	115.835	35.7681	774.428	AAEL026388
LOC110675111	0	0.146061	0	0	0.0985012	0.0634988	0	0	0	0	0	0	AAEL020289
LOC110675112	1.48942	1.09474	1.04204	4.33878	3.09767	3.00202	2.19124	2.37414	2.80106	0.902271	2.62015	2.62818	AAEL026002
LOC110675113	0.583973	0.445737	0.141426	2.16656	0.910904	1.16268	0.463939	1.39628	1.54441	0.318388	0.866795	1.28808	AAEL021041
LOC110675114	19.5687	24.9822	14.8598	13.788	17.8507	13.8971	24.2105	20.3661	20.1519	22.0298	18.1847	22.7941	AAEL024572
LOC110675115	0	0.0441058	0.0129176	0	0	0.0430692	0.0141252	0.0318837	0	0.0145405	0.0263906	0.0264715	AAEL027856
LOC110675116	0	0	0	0	0	0.0610529	0	0	0	0	0	0	AAEL023235				GO:0003924,GO:0005874,GO:0007017	GTPase activity,microtubule,microtubule-based process
LOC110675117	0.0529225	0.0624775	0.209169	0	0	0.0318446	0.0560592	0	0.143321	0.0553995	0.0523689	0.257744	AAEL026319
LOC110675118	0	0	0	0	0	0	0	0	0	0	0	0	AAEL023814
LOC110675119	11.2614	8.71779	16.2027	14.9405	14.6863	20.8286	12.7893	18.4216	16.3267	10.8705	10.084	12.3627	AAEL026039
LOC110675120	0	0.0159317	0.13786	0.0140796	0	0.12593	0	0.0302463	0	0	0.0168989	0	AAEL027721
LOC110675121	2.85782	2.4237	1.3842	0.78538	0.990608	0.842946	3.0272	1.34974	0.83977	0.346247	1.09975	1.2607	AAEL019979				GO:0016747	transferase activity, transferring acyl groups other than amino-acyl groups
LOC110675122	0.818751	1.05253	0.667904	1.36426	0.71698	1.14395	1.00422	1.64854	1.00288	1.12772	0.895467	1.21663	AAEL026491				GO:0003676	nucleic acid binding
LOC110675124	2.71409	1.33799	2.79755	1.97861	2.05769	2.56926	2.04764	2.23655	2.37257	1.46881	2.47622	1.62294	AAEL010579
LOC110675125	0.0531718	0	0	0	0	0	0	0	0	0	0	0	AAEL009230				GO:0003676	nucleic acid binding
LOC110675126	0	0	0	0	0	0	0	0	0	0	0	0	AAEL021942
LOC110675127	0	0.820723	0.781209	0.265949	0.83861	0.951473	0	0.571319	0	0.586238	0.266001	0.474339	AAEL023878
LOC110675128	420.065	540.262	461.256	530.109	394.364	480.205	513.852	537.627	518.859	565.727	554.899	586.713	AAEL026302
LOC110675129	0	0	0	0	0	0	0.07133	0.0534022	0	0	0	0	AAEL025167				GO:0003676,GO:0004523,GO:0090502	nucleic acid binding,RNA-DNA hybrid ribonuclease activity,RNA phosphodiester bond hydrolysis, endonucleolytic
LOC110675130	0.25946	0.266658	0.220389	0.126451	0.229937	0.314417	0.331702	0.482172	0.202812	0.0836218	0.158095	0.0902139	AAEL023436
LOC110675131	0.144615	0.215924	0.229491	0.194845	0.0910222	0.276983	0.109851	0.234562	0.104672	0.289447	0.381292	0.252665	AAEL020335
LOC110675133	0.123615	0.251608	0.0598737	0.122298	0.385638	0	0	0.131362	0.261534	0.471772	0.428125	0	AAEL022027
LOC110675135	0	0	0	0	0	0.103221	0	0	0	0	0	0	AAEL000356	cysteine-rich venom protein, putative [Source:VB Community Annotation]
LOC110675136	0	0	0	0	0	0.0350729	0	0	0	0	0	0	AAEL025221
LOC110675137	0.118983	0	0	0	0	0	0	0	0	0	0	0	AAEL023420
LOC110675138	0.855931	0.74665	0.414576	0.887136	1.08081	1.1902	0.949837	1.12614	0.862339	0.977768	0.403322	0.719214	AAEL027907
LOC110675139	4.84222	4.57051	3.91603	7.65445	6.82908	6.9517	5.43152	7.26194	5.71293	5.8785	4.30433	5.58376	AAEL025034				GO:0016491,GO:0051287,GO:0055114	oxidoreductase activity,NAD binding,oxidation-reduction process
LOC110675140	0	0	0	0	0	0	0	0	0	0.0472399	0	0.0503847	AAEL024810				GO:0000786,GO:0003677,GO:0006334,GO:0042025	nucleosome,DNA binding,nucleosome assembly,host cell nucleus
LOC110675142	0.763779	1.30157	1.54782	1.35064	1.15309	1.96159	0.436344	1.15281	0.80895	1.14965	0.826825	1.00795	AAEL025920
LOC110675143	1.97721	2.9746	4.24708	2.12624	2.86064	3.34706	2.73182	2.00977	2.45537	4.96814	4.67864	1.66861	AAEL023030
LOC110675144	0.134261	0.201853	0.0197062	0.390441	0.394525	0.297014	0.24996	0.181587	0.105446	0.252874	0.315031	0.203709	AAEL026333
LOC110675145	1.23615	0.89321	0.957979	1.10068	1.92819	1.91423	1.63677	1.97043	1.96151	1.21313	2.44643	1.1997	AAEL023936
LOC110675146	7.5484	7.0761	9.74951	7.79166	8.87021	9.99851	8.88696	8.82609	8.52063	8.88481	8.88006	7.0652	AAEL027347				GO:0003677	DNA binding
LOC110675147	0.014431	0	0	0	0	0.00901396	0	0	0	0	0	0	AAEL020141
LOC110675148	0.136301	0.119069	0.14167	0.173625	0.35465	0.310585	0.206345	0.0932464	0.237012	0.223256	0.231545	0.154836	AAEL024635
LOC110675149	127.102	47.2372	332.045	176.831	190.145	515.331	90.1466	190.737	178.461	172.19	264.504	43.4305	AAEL021870
LOC110675150	264.551	305.407	277.9	303.909	303.47	354.342	257.412	271.516	251.289	313.667	326.998	286.561	AAEL020753				GO:0008073	ornithine decarboxylase inhibitor activity
LOC110675151	0	0	0	0	0	0	0	0	0	0	0	0	AAEL025681
LOC110675152	0.297883	0.168422	0	0.0327455	0	0.117152	0	0	0	0	0	0.029202	AAEL022037				GO:0046983	protein dimerization activity
LOC110675153	11.944	10.4747	12.4797	12.5514	10.601	13.3349	11.7007	13.3899	15.0531	11.4738	10.8737	11.2748	AAEL025693
LOC110675154	0	0	0.14914	0	0	0	0	0	0	0	0	0	AAEL022038
LOC110675155	0	0	0	0	0	0	0	0	0	0.0193569	0	0	AAEL022776				GO:0003676,GO:0003677	nucleic acid binding,DNA binding
LOC110675156	0	0.0263133	0.0250464	0	0	0	0	0	0	0	0	0.0285147	AAEL027272				GO:0003677	DNA binding
LOC110675157	2.9675	2.6035	2.03209	2.73341	1.70256	2.03733	2.81821	2.66414	2.00259	1.89686	1.67074	1.57994	AAEL023973				GO:0005515	protein binding
LOC110675158	0	0	0	0	0	0	0	0	0	0	0	0	AAEL024388
LOC110675159	0.736314	0.749356	0.713278	1.82117	1.14853	1.46599	0.194989	0.782459	1.75256	0.802891	0.182153	0.649638	AAEL020928				GO:0003676	nucleic acid binding
LOC110675160	0.0495182	0.100791	0	0.171467	0.0772404	0.109545	0.0262265	0.0263107	0.078575	0.0809934	0.0245	0.131067	AAEL024344
LOC110675161	0.0323191	0	0	0	0	0	0	0	0	0	0	0	AAEL024087
LOC110675162	23.4928	23.2379	26.3926	23.9235	23.1092	29.694	23.5089	26.2048	24.3733	26.3465	24.3887	22.7547	AAEL027557				GO:0003777,GO:0005515,GO:0005871	microtubule motor activity,protein binding,kinesin complex
LOC110675163	1.56564	0.793522	0.787458	2.6917	2.05723	2.78184	1.6848	1.06657	0.647137	4.80053	3.02465	1.62834	AAEL023788
LOC110675165	0.188786	0.0932395	0.244736	0.49715	0.202091	0.356218	0.2882	0.22717	0.41704	0.553995	0.326919	0.266991	AAEL021329
LOC110675167	0.123302	0.0751081	0.171755	0	0.0496035	0.0653053	0.212598	0.201804	0.178992	0.139357	0.167432	0.0579668	AAEL026899
LOC110675168	4.68191	4.38658	4.32057	6.00503	6.15599	5.53808	3.65129	3.66301	4.40109	4.57577	5.00665	3.99855	AAEL023493
LOC110675169	0.541308	1.10179	0.674194	0.535541	1.04539	0.615851	0.327652	0.986112	0.572629	0.421609	0.382604	0.341134	AAEL019571				GO:0004672,GO:0005524,GO:0006468	protein kinase activity,ATP binding,protein phosphorylation
LOC110675171	0	0	0.043335	0.0379353	0	0	0	0	0	0	0	0	AAEL025011				GO:0000786,GO:0003677,GO:0046982	nucleosome,DNA binding,protein heterodimerization activity
LOC110675172	0.251216	0.246126	0.108966	0.114996	0.319724	0.160917	0.246247	0.0239069	0.553319	0.243267	0.115018	0.21172	AAEL020386
LOC110675173	0.930506	0.473494	0.180279	0.276178	0.483814	0.494034	0.492829	0.613069	0.492173	0.633137	1.00917	0.492583	AAEL025005
LOC110675174	0	0	0	0	0.0202847	0	0	0	0	0	0	0.0172103	AAEL020174				GO:0003924,GO:0005525,GO:0005874,GO:0007017	GTPase activity,GTP binding,microtubule,microtubule-based process
LOC110675175	0	0	0.0854447	0.0593398	0	0	0.0934321	0.093732	0	0.0961796	0	0.286382	AAEL023540
LOC110675176	0	0	0	0	0	0	0	0	0	0	0	0	AAEL027001				GO:0003676,GO:0008270	nucleic acid binding,zinc ion binding
LOC110675177	0	0	0	0	0	0	0	0.00766354	0	0	0	0	AAEL022630				GO:0003824,GO:0005634,GO:0008484,GO:0046872	catalytic activity,nucleus,sulfuric ester hydrolase activity,metal ion binding
LOC110675178	0.804504	0.917997	0.49594	0.506502	0.557732	0.798183	0.852187	0.259067	0.361053	0.478498	0.458353	0.150564	AAEL026110				GO:0005886,GO:0007155	plasma membrane,cell adhesion
LOC110675179	0.58475	0.671456	0.911002	0.00927753	0	0.0118542	0.498791	0.481885	0.443567	0.636163	0.83514	0.260618	AAEL021237				GO:0003676	nucleic acid binding
LOC110675180	0.141127	0	0	0	0	0	0	0	0	0	0	0	AAEL028058				GO:0005549	odorant binding
LOC110675181	0.321324	0.123402	0.156223	0.293908	0.0567413	0.0890559	0.269727	0.0644268	0.0577217	0.0661091	0.0839901	0.0213962	AAEL022553				GO:0003676,GO:0008270	nucleic acid binding,zinc ion binding
LOC110675182	0	0.0953977	0	0	0	0	0.248233	0	0.0991611	0	0	0	AAEL022052
LOC110675184	4.16212	2.91679	11.1893	6.16396	6.77084	11.9525	4.93622	6.98019	6.79991	3.17404	3.21504	3.84654	AAEL021132				GO:0015267,GO:0016020,GO:0055085	channel activity,membrane,transmembrane transport
LOC110675185	4.31128	3.40796	4.12858	3.07202	2.51029	3.56381	2.62069	3.55064	3.36833	2.96241	3.11822	4.48468	AAEL024878
LOC110675186	0.963091	0.966459	1.22657	1.3443	2.12564	2.15892	1.56505	1.65417	2.09289	1.99939	0.835552	1.23374	AAEL020254				GO:0003677,GO:0006260	DNA binding,DNA replication
LOC110675187	0	0	0.0359899	0	0	0	0	0	0	0	0	0	AAEL028051				GO:0005576,GO:0008061	extracellular region,chitin binding
LOC110675188	0.253817	0	0	0	0.0879808	0	0.0896201	0.179816	0.0895009	0.0922556	0	0.223939	AAEL023537				GO:0003676	nucleic acid binding
LOC110675190	0.0987476	0.120596	0.0956582	0	0	0.0349521	0	0.104936	0	0.0215353	0.0977145	0	AAEL027746
LOC110675191	0	0.0108451	0.00850125	0	0	0	0	0	0	0	0	0	AAEL025036
LOC110675192	0.159265	0.405216	0.192853	0.315137	0.0828095	0.0704657	0.168705	0.126935	0.0842403	0.173666	0.157599	0.351293	AAEL021441				GO:0000166,GO:0005524,GO:0016020,GO:0016021,GO:0016887,GO:0042626,GO:0055085	nucleotide binding,ATP binding,membrane,integral component of membrane,ATPase activity,ATPase-coupled transmembrane transporter activity,transmembrane transport
LOC110675194	3.23703	5.78524	4.20651	0	0	0	1.92352	3.1882	1.67041	2.92709	2.96879	1.53248	AAEL027107				GO:0003723,GO:0005737,GO:0030430	RNA binding,cytoplasm,host cell cytoplasm
LOC110675195	0.215735	0.439113	0.626957	1.28062	0.673025	0.954504	0.914087	0.229255	0.684654	1.41145	0	0.761359	AAEL019497
LOC110675196	3.41561	2.67561	3.27762	5.10667	4.70241	5.00893	3.89038	4.89485	4.31743	3.49751	3.47982	3.57115	AAEL006679	3-hydroxyisobutyrate dehydrogenase, putative [Source:VB Community Annotation]			GO:0016491,GO:0050661,GO:0051287,GO:0055114	oxidoreductase activity,NADP binding,NAD binding,oxidation-reduction process
LOC110675197	0.0286068	0.0308603	0.0460016	0.131321	0.0517615	0.229342	0.0424232	0	0.0121048	0.0374321	0.045292	0	AAEL023830
LOC110675198	1.27353	0.353896	1.64929	0.156378	0.117405	0.16784	1.14809	1.67008	0.745268	1.14738	1.07251	1.05588	AAEL027414
LOC110675199	0	0	0	0.462201	1.21454	0.620098	0	0	0	0.50942	1.15573	0.412184	AAEL024986
LOC110675200	0	0	0	0	0	0	0	0	0	0	0	0	AAEL022348
LOC110675201	0	0	0	0	0	0	0	0	0	0	0	0	AAEL026426
LOC110675202	0	0	0	0	0	0	0	0	0	0	0	0	AAEL023868
LOC110675203	0.187475	0	0.121073	0.123651	0.454892	0.331787	0.198586	0	0	0.272568	0.247351	0.275677	AAEL027332				GO:0005515	protein binding
LOC110675204	0.046725	0.0126807	0.0301754	0.0616362	0.097178	0.079936	0.0164981	0.0662044	0	0.0339666	0	0.0549663	AAEL025162
LOC110675205	0.135983	0.0706682	0.0566154	0.343492	0.425428	0.528937	0.326702	0.352962	0.424208	0.0334416	0.207853	0.207788	AAEL021009
LOC110675207	0	0	0	0	0	0	0	0	0	0	0	0	AAEL021260
LOC110675208	0	0	0	0	0	0	0	0	0	0	0	0	AAEL025461
LOC110675209	0	0	0	0	0.021282	0.0181096	0	0	0	0	0	0	AAEL022874
LOC110675210	20.0219	16.2164	22.9514	20.5514	22.6425	28.495	21.0319	24.5569	26.652	15.1007	17.9138	19.1371	AAEL026371				GO:0016020,GO:0016021,GO:0016874,GO:0046872	membrane,integral component of membrane,ligase activity,metal ion binding
LOC110675211	0.0243672	0.0619971	0.038948	0.265183	0.0684161	0.149857	0.131638	0.0660305	0.0734648	0.0757259	0.0301403	0.018274	AAEL022223
LOC110675212	0	0	0	0.201865	0	0.0252771	0.0216132	0.216826	0	0	0.0222094	0.018002	AAEL021647
LOC110675215	0.68951	0.701723	1.74482	1.30864	1.82913	3.3682	0.953962	1.27105	0.922922	1.04339	1.2532	0.521438	AAEL024593
LOC110675216	53.6488	41.0122	46.2225	48.919	55.2748	35.2219	68.0895	83.2833	97.8138	52.2993	68.5	91.3951	AAEL024000				GO:0005549	odorant binding
LOC110675217	1.12901	0.383004	4.13173	0.744656	1.30451	2.33111	0	0.799847	1.06164	0.547155	0.124134	0	AAEL027468				GO:0005549	odorant binding
LOC110675220	0.119262	0	0	0.117991	0	0	0	0	0	0	0.0590072	0	AAEL021689
LOC110675222	0	0	0.19076	0	0	0	0	0	0.208315	0	0	0.0573344	AAEL027683
LOC110675223	1.23804	1.72663	1.59908	1.38363	2.74176	2.31278	1.62713	2.09527	1.40669	1.32499	1.56539	0.829344	AAEL023243				GO:0005509,GO:0005886,GO:0007155,GO:0007156,GO:0016020	calcium ion binding,plasma membrane,cell adhesion,homophilic cell adhesion via plasma membrane adhesion molecules,membrane
LOC110675224	0	0	0.043335	0.0379353	0	0	0.142158	0	0	0	0	0	AAEL024349				GO:0000786,GO:0003677,GO:0046982	nucleosome,DNA binding,protein heterodimerization activity
LOC110675225	0	0.163677	0.0623186	0.0636458	0.0334488	0.0569258	0.102216	0.205089	0.0680536	0.0350741	0.0636582	0.0567585	AAEL027614
LOC110675227	0.236856	0	0.229446	0	0.246305	0.419181	0.250895	0	0	0	0.234378	0	AAEL026647				GO:0000786,GO:0003677,GO:0046982	nucleosome,DNA binding,protein heterodimerization activity
LOC110675228	0	0	0	0	0	0	0	0	0	0	0	0	AAEL026563				GO:0005549	odorant binding
LOC110675229	0.109083	0	0.0528354	0.107921	0.0567176	0	0	0.11592	0	0.118947	0	0.0481214	AAEL023086
LOC110675230	0	0	0.0162028	0	0	0	0	0	0	0	0	0.0147572	AAEL023149				GO:0004497,GO:0005506,GO:0016020,GO:0016021,GO:0016705,GO:0020037,GO:0046872,GO:0055114	monooxygenase activity,iron ion binding,membrane,integral component of membrane,oxidoreductase activity, acting on paired donors, with incorporation or reduction of molecular oxygen,heme binding,metal ion binding,oxidation-reduction process
LOC110675231	0.409578	0.665111	0.197298	2.08143	1.57799	2.02406	0.924607	0.242597	0.215455	8.51736	1.85372	1.62318	AAEL026572
LOC110675232	10.6077	63.4145	52.6644	39.0226	113.331	30.5117	37.2102	0.114628	2.4716	0.470484	1.28087	21.3181	AAEL021721
LOC110675233	0.152022	0.154714	0.147266	0.360964	0.379407	0.107617	0.161032	0.0646196	0.0643271	0.298381	0.24069	0.0804758	AAEL025283
LOC110675234	0	0	0.0323211	0.0500142	0	0	0	0	0	0	0	0	AAEL021321				GO:0003676,GO:0003677	nucleic acid binding,DNA binding
LOC110675235	0.00866005	0.0183613	0.00699093	0.0713982	0.00750461	0	0.0344	0.015338	0.0358811	0.00944309	0.0149965	0.020375	AAEL024378
LOC110675236	0	0	0.0204301	0.0208652	0	0	0	0	0	0	0	0.0186073
LOC110675237	0.289491	0.491031	0	0.0954688	0.30104	0.683109	0.102216	0.205089	0.204161	1.57833	4.77437	0.0851378	AAEL020775				GO:0031409	pigment binding
LOC110675238	26.2747	263.598	162.737	115.387	295.181	105.701	105.824	0.444359	8.25643	7.40939	7.13768	50.9124	AAEL024584
LOC110675239	0	0.0233465	0.03268	0.0160205	0	0	0.0628936	0.0172079	0.01713	0	0	0	AAEL023789
LOC110675240	0	0	0	0	0	0	0	0	0	0	0	0	AAEL027251				GO:0003677,GO:0006313,GO:0015074	DNA binding,transposition, DNA-mediated,DNA integration
LOC110675241	13.1253	13.933	6.93528	9.07118	13.2897	8.28011	11.6082	10.3441	10.4302	9.65553	9.5701	16.844	AAEL020558				GO:0005506,GO:0016705,GO:0020037,GO:0055114	iron ion binding,oxidoreductase activity, acting on paired donors, with incorporation or reduction of molecular oxygen,heme binding,oxidation-reduction process
LOC110675242	12.2547	157.909	52.6053	90.214	144.318	78.537	106.255	2.9173	8.59925	194.532	78.2161	38.953	AAEL024610
LOC110675243	12.6068	170.051	62.4945	94.9468	162.567	80.6963	105.42	2.47896	8.62616	212.866	88.9262	46.5325	AAEL021662
LOC110675244	0	0.0491724	0	0	0.140075	0.172314	0	0	0	0.0399132	0	0	AAEL021341
LOC110675246	12.818	10.981	13.6088	11.5176	10.3062	13.9268	9.63891	11.0781	10.556	11.0578	8.72341	8.73238	AAEL019976
LOC110675247	0.0337136	0.0135647	0.0151902	0.0155137	0	0.0464834	0.0722541	0	0.0539112	0.0410366	0.119479	0.0235193	AAEL022298
LOC110675252	0	0	0	0	0.0240645	0	0	0	0	0	0	0.0204172	AAEL022211				GO:0003924,GO:0005525,GO:0005874,GO:0007017	GTPase activity,GTP binding,microtubule,microtubule-based process
LOC110675253	5.52619	5.30326	10.0079	8.00486	8.40392	11.7088	5.69689	8.68951	7.40217	4.96861	5.31241	4.37842	AAEL027881				GO:0005509,GO:0005886,GO:0007155,GO:0007156,GO:0016020	calcium ion binding,plasma membrane,cell adhesion,homophilic cell adhesion via plasma membrane adhesion molecules,membrane
LOC110675255	0	0	0	0.232903	0.0849316	0.0225317	0	0.0765811	0.0127057	0.0350994	0	0.0635816	AAEL026504				GO:0003677,GO:0003700,GO:0005737,GO:0006355,GO:0042025	DNA binding,DNA-binding transcription factor activity,cytoplasm,regulation of transcription, DNA-templated,host cell nucleus
LOC110675256	1.39832	1.42309	0.225762	0.23057	0.363526	0.309338	0.617166	0.742977	0.493076	0.635315	0.345923	0.822478	AAEL021867
LOC110675257	3.97602	8.21069	2.85368	4.34591	4.17075	4.10726	5.25387	5.16003	3.66118	3.4741	3.68243	2.08334	AAEL025410				GO:0005515,GO:0005634,GO:0016020,GO:0016021	protein binding,nucleus,membrane,integral component of membrane
LOC110675258	0.831933	0.476549	0.831609	0.154422	0.243468	0	0.248004	0.220603	0.0825581	0.85099	0.38613	0	AAEL020648
LOC110675259	0.222126	0.194663	0.215448	0.0230303	0.00729126	0.00818981	0.0528811	0.175843	0.163773	0.015291	0.102685	0.225919	AAEL024223				GO:0003676	nucleic acid binding
LOC110675260	0.488573	0.631448	0.94948	2.6007	2.3533	3.1165	1.8193	1.78373	1.20491	1.09492	1.00845	1.48095	AAEL026248
LOC110675261	1.39386	0.923845	1.14601	0	0.030451	0.126968	1.57884	1.3583	1.81991	0.670541	1.14167	1.17553	AAEL022684
LOC110675262	0.695839	1.56178	0.879221	1.01664	1.12283	0.547424	2.37258	1.64075	1.75252	0.895264	2.36195	3.21231	AAEL027409
LOC110675263	1.54711	0.840632	0.717603	0.687486	0.197696	0.597495	0.972176	1.06586	1.11652	0.85065	1.36875	1.55586	AAEL023828
LOC110675264	0	0	0.124149	0	0	0	0	0	0	0	0.150369	0.0533055	AAEL023239
LOC110675265	0	0.120385	0.229179	0	0	0.104673	0.125301	0	0	0	0	0	AAEL027864
LOC110675266	0.341961	0	0.0946464	0.419514	0	0.359657	0	0.103826	0.0516782	0.319612	0	0.315499	AAEL024648
LOC110675267	0	0.0771724	0.0484816	0	0.0788544	0.178486	0	0.0531838	0.0529431	0	0.274632	0	AAEL020791
LOC110675268	0	0	0	0.0611713	0	0	0	0.102896	0.0407255	0.0852299	0	0.0514639	AAEL021378
LOC110675269	0	0	0	0	0.358794	0	0	0	0	0	0	0	AAEL025340
LOC110675270	0.289904	0	0	0	0	0.128266	0	0	0.153339	0.158058	0.286871	0	AAEL020663
LOC110675271	0.546565	0.265817	0.423861	0.531171	0.320361	0.617317	0.378748	0.430573	0.482547	0.352155	0.350133	0.317435	AAEL027300
LOC110675272	2.26592	2.95254	1.711	1.39871	1.29966	2.13646	2.49595	1.70407	3.21925	2.63552	2.3572	1.87046	AAEL025536
LOC110675273	0.214702	0.296182	0.183941	0.0469645	0.079047	0.0274547	0.240902	0.289813	0.268809	0.580553	0.67114	0.28688	AAEL021875				GO:0003676,GO:0003677	nucleic acid binding,DNA binding
LOC110675274	0.108137	0.0853853	0.102948	0.046114	0.158982	0.202926	0.163919	0.194165	0.236677	0.0630232	0.0627273	0.0690881	AAEL022303
LOC110675275	0.116204	0.236525	0.201577	0.0775354	0.216388	0.0334787	0.226145	0.203897	0	0.218062	0.211258	0.188361	AAEL026857
LOC110675276	0.381997	2.1382	1.85023	0.188964	0.198618	0.169012	0.202319	1.62375	1.2123	0.624806	0	1.85367	AAEL026334
LOC110675277	0	0.472905	0.0933893	10.0052	7.30632	9.21664	3.71714	3.15947	3.74891	3.25248	3.1977	2.17406	AAEL022884
LOC110675278	0	0	0	0	0	0	0.0477408	0	0	0	0	0	AAEL025178
LOC110675279	0	0	0.493148	0	0.211753	0.0900944	0.323548	0.108196	0.107706	0.666126	0	0	AAEL023797
LOC110675280	0	0.111796	0	0	0	0	0	0	0	0	0	0.193838	AAEL027677
LOC110675281	0	0.265497	0.126357	0.77429	0.949492	2.77014	0.414507	0.138613	0	26.4552	13.4236	0.575418	AAEL025898
LOC110675282	0	0	0.0812148	0	0.174365	0	0.26642	0.712735	0.443443	0	0	0.0739687	AAEL020087
LOC110675283	0.153513	0.133914	0.038948	0.0397775	0.178642	0.103498	0.0425889	0.120409	0.707582	0.0438413	0.0723368	0.112869	AAEL022525
LOC110675284	0.0435063	0.0816662	0.0468279	0.101389	0.103554	0.131749	0.0768081	0.239383	0.230118	0.0527112	0.0516613	0.14501	AAEL025374
LOC110675285	0.132825	0.114901	0	0.13141	0	0	0.232151	0	0.231842	0.144835	0.348304	0.0820327	AAEL023594
LOC110675286	0.336392	0.473644	0.255991	0.389763	0.432757	0.618045	0.198369	0.367056	0.153348	0.239749	0.281398	0.176852	AAEL028181
LOC110675287	0	0	0	0.0100378	0	0.0112224	0	0	0.0134162	0	0.0170676	0	AAEL026642
LOC110675288	63.1704	47.9678	66.5308	76.6682	74.4747	74.6396	62.6351	78.8379	77.3155	63.0085	71.1106	66.4275	AAEL023028	Density-regulated protein [Source:UniProtKB/TrEMBL;Acc:A0A0P6IY07]			GO:0003743,GO:0006413	translation initiation factor activity,translational initiation
LOC110675289	0.545971	0.848897	0.734569	0.855243	0.438956	1.07137	0.888916	0.754781	0.598953	1.14658	0.327657	0.622198	AAEL027276
LOC110675290	1.84225	0.368945	2.27087	0.0344867	0.0724974	0.385567	0.0923103	0	0.138281	0	0.0569141	0.0768869	AAEL020356
LOC110675291	0.430556	0.26291	0.206875	0.21128	0.204166	0.149349	0	0.406295	0.182187	0.281692	0.0852103	0.303899	AAEL022700
LOC110675292	0.213111	0.130131	0.102396	0.104577	0.101055	0.0739228	0.0216712	0.237337	0.0901767	0.139428	0.0421763	0.15042	AAEL021285
LOC110675293	14.051	9.63364	13.7547	10.6821	15.3806	13.8732	10.967	12.2597	12.2042	10.4832	10.8305	10.9616	AAEL028155				GO:0000166,GO:0003824,GO:0005666,GO:0006352,GO:0006384,GO:0030880,GO:0044237	nucleotide binding,catalytic activity,RNA polymerase III complex,DNA-templated transcription, initiation,transcription initiation from RNA polymerase III promoter,RNA polymerase complex,cellular metabolic process
LOC110675294	3.87746	4.42558	3.40511	2.8323	4.3713	3.84797	3.37795	3.92792	3.14345	4.14903	3.62174	4.0285	AAEL011492
LOC110675295	1.46354	1.70224	1.41775	0.723971	2.39159	1.01755	1.55028	1.22199	1.43763	2.05183	2.27578	2.21358	AAEL025201
LOC110675296	0.0685473	0.576558	0.675746	0	0.0251583	0	0.115322	0.265663	0.377497	0.0747453	0.14763	0	AAEL023556
LOC110675297	0.489787	0.299255	0.0530928	0.72298	0.26959	0.387216	0.433115	0.511238	0.343271	0.553995	0.28064	0.274784	AAEL024770
LOC110675298	0.224804	0.131552	0.192727	0.200168	0.310917	0.178038	0.250034	0.387005	0.337692	0.218166	0.229125	0.18644	AAEL023358
LOC110675299	0.124737	0.0470699	0	0	0.0364362	0.0620098	0	0.0595748	0.0593052	0	0	0.0247311	AAEL024620
LOC110675300	0	0.069732	0.031069	0.0302884	0	0.0270904	0.0849334	0.054222	0.0462657	0.133531	0.0980958	0.0424455	AAEL022869
LOC110675301	0	0	0	0	0	0	0	0	0	0	0	0	AAEL027071
LOC110675302	0.106511	0	0	0	0	0.133835	0	0.0758345	0.128448	0	0.0347808	0.0573234	AAEL021675
LOC110675303	0.573612	0.333584	0.0793809	0.5675	0.511282	0.580092	0.520809	0	0.346744	0.44677	0.0810873	0	AAEL026308
LOC110675304	0.120108	0	0	0	0.0156124	0.0531408	0.0636133	0	0.0158822	0	0.118851	0.0529847	AAEL024250
LOC110675305	0.563114	0.436695	0.488935	0.371409	0.2445	0.326299	0.368188	0.482222	0.415785	0.544808	0.788332	0.302521	AAEL020550
LOC110675306	96.2034	68.0717	49.6297	75.8423	69.654	62.4614	41.6063	41.4374	38.6404	31.5534	42.1533	55.5814	AAEL023643				GO:0004252,GO:0006508	serine-type endopeptidase activity,proteolysis
LOC110675307	0.136233	0.169919	0.290733	0.250308	0.124625	0.506674	0.415562	0.306957	0.707574	0.33396	0.177378	0.218703	AAEL027826
LOC110675308	0.713851	0.508329	0.311495	1.1792	0.267506	0.690481	1.57363	1.06385	1.31755	0.163627	0.460316	1.16696	AAEL026062
LOC110675309	0.756289	0.573086	0.210525	0.294323	1.48152	0.719656	1.61962	1.40312	1.08104	1.22911	0.647064	0.19856	AAEL022807
LOC110675310	0	0.134738	0	0.130982	0.344185	0.234304	0	0	0	0	0	0.116808	AAEL026138
LOC110675311	0	0	0	0	0	0	0	0	0	0	0	0	AAEL021457
LOC110675312	0.33674	0.428381	0.0815512	0	0	0.074494	0.267524	0.0447305	0	0.091797	0	0.14855	AAEL024983
LOC110675313	0.402816	0.163734	0.117181	0.0299192	0.35599	0	0.0320339	0	0	0.0435282	0	0	AAEL023872
LOC110675314	0.303091	0.424132	0.201856	0.149931	0.157591	0.0670501	0.3347	0	0	0.181773	0.07498	0.180504	AAEL023433
LOC110675315	0.242393	0.229912	0.312767	1.0072	1.02539	0.628885	0.102704	0.481167	0.649251	0.352061	0.143914	0.513264	AAEL026753
LOC110675316	0.0603034	0.375901	0.170869	0.0745761	0	0.033351	0.106995	0.171421	0.116422	0.110141	0.161116	0	AAEL022186
LOC110675317	0.712133	1.70846	0.516149	1.10159	0.266382	2.02496	1.36215	0.86202	1.30073	1.1322	0.74693	1.30482	AAEL022022
LOC110675318	649.905	613.276	515.305	383.188	431.688	377.46	439.351	471.527	466.035	516.844	558.051	533.78	AAEL021342	V-type proton ATPase subunit [Source:UniProtKB/TrEMBL;Acc:Q1HQS1]
LOC110675319	0	0.069264	0.00395575	0	0	0	0	0	0	0	0	0	AAEL025067
LOC110675320	0.438558	0	0.116076	0.355644	0	0.176011	0	0.0840405	0	0.086235	0.0782569	0.0697748	AAEL025023
LOC110675321	0.0595961	0	0.0317524	0.194572	0.0898617	0.116018	0	0	0	0	0.114996	0.131452	AAEL022904
LOC110675322	0.338013	0.268025	0.218962	0.0430837	0.0237207	0.0403697	0.0483254	0.145442	0	0.0700973	0.0861842	0.0969685	AAEL026320
LOC110675323	0	0	0	0	0.136872	0.116469	0.139422	0.13987	0	0.143522	0	0	AAEL021677
LOC110675324	4.18291	2.74602	6.71048	1.28005	2.25154	2.66947	4.90765	6.67597	6.98967	5.41365	5.63565	3.73348	AAEL022120
LOC110675325	0.0949638	0.158499	0.158228	0.0845568	0.0632014	0.0689062	0.0905331	0.0827505	0.0502293	0.10355	0.152232	0.122326	AAEL025753
LOC110675326	0	0	0	0	0.308511	0	0	0	0	0	0	0	AAEL020165
LOC110675327	0	0.0462482	0.0581085	0.269755	0.53494	0.160848	0	0.193165	0.0961454	0.0495523	0.134904	0.120282	AAEL024928
LOC110675328	0	0	0	0.0232314	0	0.0321122	0	0.0952759	0	0	0	0.0470851	AAEL023477
LOC110675329	0.0581966	0	0.0563759	0.0575765	0	0.102995	0	0	0	0	0.0575877	0	AAEL028060
LOC110675330	0.613039	0.467923	0.29693	0.47156	0.159374	0	0.649374	0.325729	0	0.417794	0.151656	0.405656	AAEL023476
LOC110675331	0.396976	0.185325	0.151706	0.176556	0.0530218	0.286823	0.154314	0.197382	0.527821	0.21445	0.493731	0.395232	AAEL028090
LOC110675332	7.80004	5.22061	9.18974	3.61514	4.09214	4.41488	3.87065	4.25645	4.90621	11.9534	6.46679	4.21591	AAEL022559
LOC110675333	0	0	0.217771	0	0	0.26656	0.157164	0	0	0.161786	0.191309	0.130905	AAEL027173
LOC110675334	0	0	0	0.443712	0.728723	0.930147	0.371151	0.372342	0.370657	0	0	0	AAEL021259
LOC110675335	2.27829	5.37384	4.64118	0.0486891	0.0511767	0	1.32166	2.04269	1.3199	2.14969	3.73833	1.00888	AAEL025714
LOC110675336	0	0	0	0	0	0	0	0	0	0	0	0	AAEL021966
LOC110675337	0	0.0236561	0	0	0	0	0	0	0	0	0	0	AAEL024874
LOC110675338	0	0	0	0	0	0	0	0	0	0	0	0	AAEL025192
LOC110675339	0	0	0	0	0.132912	0.1131	0	0	0	0.13937	0	0	AAEL023482
LOC110675340	0.0516843	0	0.0831117	0	0	0.035673	0	0.0911728	0.131219	0.149911	0	0.0300962	AAEL021048
LOC110675341	0.0594073	0.138553	0.128286	0	0.136425	0.085424	0.0537513	0.018413	0.146638	0.224027	0.18738	0.0480463	AAEL023771
LOC110675342	0.0252717	0.0849223	0.0230953	0.12171	0.0495847	0.168774	0.195468	0.0101341	0.0756621	0.214215	0.302919	0.0294486	AAEL019897				GO:0003676	nucleic acid binding
LOC110675343	14.7204	16.7798	15.0401	10.6239	12.4927	13.2634	12.2279	13.1468	12.1406	11.1726	9.66299	13.56	AAEL024690				GO:0004222,GO:0006508,GO:0008233,GO:0008237,GO:0016787,GO:0046872	metalloendopeptidase activity,proteolysis,peptidase activity,metallopeptidase activity,hydrolase activity,metal ion binding
LOC110675344	0	0	0	0	0	0	0	0	0	0	0	0	AAEL023545
LOC110675345	0	0.205589	0.19569	0	0.210069	0	0	0	0	0	0	0	AAEL027165
LOC110675346	1.13838	1.42029	0.607981	0.692438	0.610689	0.859169	0.910453	0.923617	1.40177	1.31488	0.997138	0.848673	AAEL022381
LOC110675347	1.09242	0.441439	1.62238	0.278142	0.0835296	0.302083	0.587093	0.567638	0.0849728	0.691946	0.49678	0.761848	AAEL025998
LOC110675348	0.198073	0	0	0	0.308962	0	0.104906	0.210486	0	0	0.0980002	0.0873782	AAEL025866
LOC110675349	0	0	0	0	0	0	0	0	0.203967	0	0	0	AAEL021290
LOC110675350	41.9328	37.2678	45.9869	46.3215	33.5448	46.4431	42.9579	48.05	45.3401	36.0493	35.2688	36.665	AAEL020466				GO:0016971,GO:0016972,GO:0055114	flavin-linked sulfhydryl oxidase activity,thiol oxidase activity,oxidation-reduction process
LOC110675351	0.245438	0	0.237759	0.607057	0.255229	0.651552	0	0.326024	0.12982	0.468353	0.303588	0.378956	AAEL028103
LOC110675352	0.161288	0.246217	0.0781209	0	0.167722	0	0.341694	0.128547	0	0.0580375	0.478801	0.0711509	AAEL023268
LOC110675353	0	0	0	0	0	0	0	0	0.0564839	0	0.092863	0	AAEL026704
LOC110675354	0	0.344704	0	0.251322	0.176108	0.0749285	0.17939	0.179966	0.358302	0.0923324	0.418951	0.298834	AAEL019759				GO:0004784,GO:0006801,GO:0016209,GO:0016491,GO:0019430,GO:0046872,GO:0055114,GO:0098869	superoxide dismutase activity,superoxide metabolic process,antioxidant activity,oxidoreductase activity,removal of superoxide radicals,metal ion binding,oxidation-reduction process,cellular oxidant detoxification
LOC110675355	0	0	0	0	0	0.143176	0	0	0	0	0.160109	0.28551	AAEL025857
LOC110675356	0	0	0	0	0	0	0	0	0	0	0	0	AAEL021906
LOC110675357	0.179984	0.210996	0.137938	1.37156	0.979651	1.64104	0.080846	0.211843	0.120505	0.134151	0.149921	0.611068	AAEL024970
LOC110675358	0.236338	1.15221	1.91929	0.0896077	0	0	2.77329	1.25274	2.44474	10.853	8.58861	0.0412041	AAEL025157
LOC110675359	2.99837	2.57256	1.81266	0.796538	0.370982	0.810702	1.0484	2.42511	2.44791	3.51469	1.91344	1.94732	AAEL020424
LOC110675360	10.0989	8.54353	11.1018	4.98323	4.10277	5.99428	5.74607	7.43061	8.74481	11.6526	8.91973	6.00352	AAEL025860
LOC110675361	0.0806439	0.0886381	0.156242	0.179515	0	0.0677925	0	0.171396	0.017062	0.175871	0.1596	0.0177877	AAEL020125
LOC110675362	0.10726	0.145547	0.0692697	0.247607	0.260258	0.189826	0.0757451	0.189971	0.151289	0.0779725	0.212276	0.126179	AAEL024768
LOC110675363	1.90126	1.26851	0.25957	2.12972	1.13179	1.25614	1.54674	1.44452	1.43002	2.14868	1.21403	0.779624	AAEL027695
LOC110675364	0	0.0258724	0.0246267	0.0983184	0.136187	0.0729403	0	0	0	0.168004	0.0533614	0	AAEL020923
LOC110675365	0.247317	0.353423	0.142752	0.141271	0.0296978	0.0338631	0.110719	0.0606966	0	0.113975	0.258859	0.163779	AAEL023300
LOC110675366	16.2184	17.2808	12.4125	17.065	17.9369	17.0472	19.1729	18.7583	18.4364	22.0494	19.4624	17.2738	AAEL027779
LOC110675367	0.104043	0.137515	0.0484308	0.221912	0.111004	0.0669574	0.218989	0.179487	0.0300173	0.08693	0.133708	0.228894	AAEL022400
LOC110675368	0	0.164799	0	0.0801025	0.16839	0.214934	0.0857639	0.0860393	0.0856499	0.088286	0.160236	0.142869	AAEL026418
LOC110675369	0	0	0.0463532	0	0.14635	0	0	0	0	0	0	0	AAEL022848
LOC110675370	3.56428	4.6086	3.48107	3.09274	3.28114	3.17983	4.61111	3.22882	2.96696	5.82985	5.14594	4.63974	AAEL020603
LOC110675371	2.96247	2.45304	3.53889	6.48331	5.40465	6.39864	4.06918	4.56251	4.86058	5.09232	3.87584	4.4526	AAEL027353
LOC110675373	0	0	0.186425	0	0	0	0	0	0	0.486844	0	0	AAEL026483
LOC110675374	0.363793	0.0595784	0.0688621	0	0	0.062903	0	0	0.0751992	0.150468	0.264818	0	AAEL025540
LOC110675375	0.0677408	0	0	0.0284323	0.0704433	0.0217974	0.0717558	0	0	0	0	0	AAEL022026
LOC110675376	3.29479	2.48133	3.12787	2.021	2.32984	2.50734	2.72225	2.80102	3.20659	2.51489	2.67346	3.02322	AAEL024628
LOC110675377	0.082077	0.0835308	0	0.487215	1.53632	0.871543	0	0.174442	0.086826	0.178997	0	0	AAEL020046
LOC110675378	27.4384	1.98649	134.791	1.60007	0.115988	23.4902	0.0590745	0	0.0589959	2.31084	5.40819	0.0984084	AAEL025434
LOC110675379	0	0	0	0	0.360913	0	0	0.257728	0	0	0	0	AAEL021912
LOC110675380	0.0613638	0.479401	0.55248	0	0.0225218	0	0.103237	0.141927	0.337937	0.106273	0.158948	0	AAEL026444
LOC110675381	2.75197	3.12388	2.46081	0.837738	5.28325	1.03027	4.70898	2.24957	2.35136	7.04035	3.56108	5.50974	AAEL023414
LOC110675382	0.191961	0.130241	0.12397	0.12661	0.532317	0.339726	0	0.135994	0.135379	0	0.126635	0.112909	AAEL027663
LOC110675383	0.377219	0.380442	0.0691331	0.245438	0.254444	0.320263	0.466173	0.276268	0.406235	0.672575	0.633891	0.593669	AAEL020900
LOC110675384	0	0	0.0290009	0.26134	0.21426	0.199463	0	0	0	0	0	0.0776864	AAEL020678
LOC110675385	0.0685473	0.473967	0.578094	0	0.0251583	0	0.115322	0.158541	0.377497	0.0747453	0.14763	0	AAEL027253
LOC110675386	10.5789	10.2346	10.2731	10.1288	9.77012	12.5809	11.4426	11.4358	11.6911	12.0335	11.8487	10.7554	AAEL019620				GO:0016021	integral component of membrane
LOC110675387	0.0685473	0.473967	0.578094	0	0.0251583	0	0.115322	0.158541	0.377497	0.0747453	0.14763	0	AAEL024324
LOC110675388	2.56256	2.1379	1.45596	0.663381	0.508548	0.673155	1.40097	1.48168	1.95437	1.79767	2.07871	2.89277	AAEL021567
LOC110675389	0.0357157	0.0181742	0.178182	0.173142	0.0798522	0.508829	0.204296	0.233417	0.0604517	0.0389451	0.0918894	0.0157557	AAEL025978
LOC110675390	0.901494	1.11406	1.18518	0.764476	0.669613	0.626779	0.98903	0.821135	0.885537	0.912792	1.1788	1.30669	AAEL022539				GO:0003676	nucleic acid binding
LOC110675391	0	0	0	0	0	0	0	0	0	0.095434	0	0	AAEL028209
LOC110675392	0.303447	0.220587	0.223404	0.235024	0.0450789	0.0383593	0.0367351	0.0921325	0.183431	0.204203	0.0566227	0.264667	AAEL023397
LOC110675393	0.190611	0.0729274	0	0.117685	0.198215	0	0	0.0502584	0.0758044	0	0.0709085	0.0417271	AAEL020803
LOC110675394	0.3674	0.31044	0.996143	0.0335319	0.0352451	0.0599828	0.0718037	0.192331	0.215125	0.0739152	0.0335384	0.239226	AAEL024836				GO:0003676,GO:0003677	nucleic acid binding,DNA binding
LOC110675395	0	0	0	0	0	0	0	0	0	0	0	0	AAEL021913
LOC110675396	1.21298	1.55763	0.790534	0.841927	0.980702	1.60722	1.50351	1.29238	1.24958	1.73123	2.57655	1.17666	AAEL024712
LOC110675397	11.4239	13.8739	10.4624	10.4453	10.7268	12.1934	11.1652	12.508	11.5535	9.76527	9.95883	9.49074	AAEL020955				GO:0003676,GO:0008270	nucleic acid binding,zinc ion binding
LOC110675398	16.5759	106.134	12.4571	85.7472	0.463782	86.9544	1.65348	0.15798	0.235897	96.6958	25.3761	0.918143	AAEL026396
LOC110675399	2.45002	14.1731	1.87371	4.20995	0.268185	1.82567	0.273182	0.13703	0.545638	6.18674	1.27599	0.227538	AAEL022796
LOC110675400	0.948372	6.06678	0.262486	2.27865	0.42266	1.79828	0.717558	0.287945	0.143321	2.95464	1.20658	0.3586	AAEL021892
LOC110675401	0.583302	6.1738	1.0171	7.73297	0	1.342	0	0.123972	0	12.7209	4.15584	0.205856	AAEL027233
LOC110675402	0	0	0	0	0	0	0.0729226	0.146313	0	0	0	0	AAEL020478
LOC110675403	13.4982	8.87198	12.4402	14.0963	9.94264	15.2622	7.74486	7.37128	7.53624	10.8346	11.5018	8.2703	AAEL026415				GO:0017121,GO:0017128	plasma membrane phospholipid scrambling,phospholipid scramblase activity
LOC110675404	0.510059	0.885992	0.41132	0.98415	0.316578	0.936951	0.519075	0.662633	0.812183	0.527059	0.369954	0.392293	AAEL022838
LOC110675405	2.00417	0.815867	1.4561	1.78453	1.91114	2.48284	0.849182	0.638931	1.06007	1.31123	0.9916	1.63563	AAEL021954
LOC110675406	0.511252	0.130077	0.371443	0	0.132912	0.0373229	0	0.543292	0.135208	0.278739	0.126476	0.112767	AAEL022354
LOC110675407	0.0895254	0.3034	0.130087	0.0885715	0	0.0261425	0.189663	0.332976	0.173311	0.471506	0.0442944	0.11848	AAEL021034
LOC110675408	11.6247	12.986	11.3327	12.7462	14.347	13.8246	11.6078	14.1105	13.3156	12.7027	13.0173	10.67	AAEL025591				GO:0000166,GO:0005524,GO:0005737,GO:0017112,GO:0055037	nucleotide binding,ATP binding,cytoplasm,Rab guanyl-nucleotide exchange factor activity,recycling endosome
LOC110675409	0.0542832	0.0241695	0.0361521	0.13594	0.142886	0.0660472	0	0.146015	0.078958	0.0369946	0.0621082	0.0448999	AAEL027369
LOC110675410	2.0609	1.82383	3.55884	0	0.186358	0.396447	0.18983	0.0952198	0	0	0	0.474339	AAEL025083
LOC110675411	0	0	0	0	0	0	0	0	0	0.202188	0	0	AAEL026485
LOC110675412	0.174847	0	0.14518	0	0.0519493	0	0	0.0530872	0	0	0.0247169	0.0220379	AAEL023034				GO:0003676	nucleic acid binding
LOC110675413	0	0	0.0283899	0.578591	0.422114	0.663809	0.023167	0	0	0.0119241	0	0.131986	AAEL025767
LOC110675414	0	0	0.0347817	0	0	0	0.0760663	0	0	0	0	0	AAEL022258
LOC110675415	0	0	0	0	0	0	0	0	0	0	0	0	AAEL025129
LOC110675416	0.934527	1.799	1.33159	1.99834	1.54255	2.81994	1.39322	1.00886	0.891832	1.28861	1.13514	1.74283	AAEL021055
LOC110675417	0.0485018	0.222124	0.0704766	0.047985	0.100873	0.214592	0.0770647	0.0257707	0.0256541	0.105775	0.16798	0.0213962	AAEL023697
LOC110675418	2.00874	1.50965	3.11343	2.18057	2.74189	2.51585	1.113	0.8972	0.91537	1.325	0.815884	1.85408	AAEL020464
LOC110675419	0.977596	0.621586	0.413984	0.575227	0.825865	1.4607	0.485712	0.356683	0.51805	0.699993	1.57356	0.404558	AAEL021876
LOC110675420	2.58844	2.32797	3.6154	2.38219	3.88106	4.42114	2.29551	3.58225	2.29245	2.36301	1.54873	2.23063	AAEL021308				GO:0003676,GO:0003700,GO:0005634,GO:0006355,GO:0008270,GO:0046872	nucleic acid binding,DNA-binding transcription factor activity,nucleus,regulation of transcription, DNA-templated,zinc ion binding,metal ion binding
LOC110675421	0	0	0.0672352	0	0	0	0	0	0	0	0	0	AAEL024116				GO:0000786,GO:0003677,GO:0046982	nucleosome,DNA binding,protein heterodimerization activity
LOC110675422	6.97797	6.82978	7.79447	7.70478	8.27761	10.5961	7.29117	9.10889	8.17457	6.68833	6.6066	5.30528	AAEL027616				GO:0003712,GO:0005634,GO:0006357,GO:0016592	transcription coregulator activity,nucleus,regulation of transcription by RNA polymerase II,mediator complex
LOC110675423	0	0	0	0	0.0697458	0	0	0	0	0	0	0.0502987	AAEL020660
LOC110675424	0	0	0.0455705	0	0	0	0.0996609	0	0	0	0	0	AAEL024409
LOC110675425	0	0.177377	0	0	0	0	0	0	0	0	0	0	AAEL024257
LOC110675426	0.939878	0.425123	0.404655	0.206636	0	0.184819	0.221241	0.332927	0.552367	0.910988	0.310015	0.276413	AAEL021678				GO:0004252,GO:0006508	serine-type endopeptidase activity,proteolysis
LOC110675427	0	0.142912	0.0544126	0.0277857	0.087616	0.0994077	0.237996	0.11938	0.17826	0	0.0277911	0.0495578	AAEL023094				GO:0005634,GO:0006915	nucleus,apoptotic process
LOC110675428	0	0	0	0	0.032856	0	0	0	0	0	0.0206349	0	AAEL026648
LOC110675429	0	0	0	0	0	0	0	0	0	0	0	0	AAEL026523
LOC110675430	0.497688	0.0844172	0	0.574449	1.12134	0.293597	0	0.0881464	0.0877474	0.0904481	0	0.0731837	AAEL020516
LOC110675432	2.87844	1.43701	1.42695	1.20112	0.795917	1.79974	1.69488	1.86334	2.05209	1.74832	1.82978	1.82502	AAEL025426
LOC110675433	0.863696	2.15224	2.99603	0.835644	1.83593	1.07897	1.34542	2.20683	1.28989	0.692493	0.785533	1.49604	AAEL020594
LOC110675434	2.19692	2.71335	1.26427	1.24815	1.48642	2.32347	1.97822	2.18931	1.9723	4.15072	3.21324	1.54078	AAEL024304
LOC110675435	0.0494568	0.152524	0.19309	0.197202	0.0514298	0	0.0523881	0.0796308	0.210859	0	0.222452	0.158673	AAEL027669
LOC110675436	0	0	0	0	0	0	0	0	0	0.21897	0	0	AAEL023160
LOC110675437	0	0	0.146259	0	0	0	0	0	0	0	0	0	AAEL026467
LOC110675438	0.46834	0.271913	0.179377	0.479169	0.466106	0.51347	0.257884	0.39026	0.301192	0.384703	0.401682	0.292159	AAEL026050
LOC110675439	0.606039	0.252372	0.166397	0.513414	0.462913	0.639033	0.378	0.413921	0.463233	0.493319	0.518302	0.416232	AAEL024992
LOC110675440	2.54124	2.61923	0.831042	0.943045	1.2886	0.506084	2.59088	1.41811	1.21003	0.623634	0.565937	2.07389	AAEL027622				GO:0042302	structural constituent of cuticle
LOC110675441	0.435166	0	0	0	0	0	0	0	0	0.237257	0	0	AAEL020512	Putative 8.5 kDa secreted protein [Source:UniProtKB/TrEMBL;Acc:Q58HC2]
LOC110675442	8.22673	13.1244	7.53858	5.2794	22.4278	1.57399	11.5406	7.08836	6.35065	4.12162	4.18034	15.1052	AAEL025118
LOC110675444	0	0	0	0	0	0	0	0	0	0	0	0	AAEL023299
LOC110675445	0.57085	0.464769	0.331794	0.790674	1.06852	0.606163	0.725621	0.4853	0.241552	0.622466	0.451902	1.3095	AAEL023853
LOC110675446	0.314193	0.319758	0	0.23148	0.347582	0.0709849	0.247841	0.142078	0.438449	0.160367	0.0661501	0	AAEL026456
LOC110675447	0	0.270574	0.264603	0.180159	0.0946818	0	0.096446	0.0967557	0.0963177	0.496411	0.180194	0.258668	AAEL022994
LOC110675448	0.145159	0.221595	0.31639	0.323128	0	0.150285	0.0507416	0.0771281	0.153558	0.197855	0.168059	0.256143	AAEL025559
LOC110675449	0.360258	0.304593	0.38836	0.398459	0.559063	0.372735	0.360084	0.726406	0.574586	0.42305	0.385739	0.37164	AAEL026131
LOC110675450	0.508056	0.413644	0.560307	1.5234	1.58497	3.02942	1.48203	0.514978	0.49611	3.57966	1.33033	0.999943	AAEL022847
LOC110675451	0	0	0	0.694898	0.486935	0	0	0	0.247674	0.510594	0.115839	0	AAEL027693
LOC110675452	0.079948	0.16929	0.0524639	0.244943	0.0911829	0.0730268	0.102443	0.0424792	0.103671	0	0.160775	0.0432323	AAEL023738				GO:0003676	nucleic acid binding
LOC110675453	13.6537	21.3468	25.878	0.0978857	0.205774	0.262651	13.9389	8.72666	7.01253	45.8516	21.5391	13.6177	AAEL026690
LOC110675454	597.445	948.444	1057.07	277.35	255.868	310.346	837.746	432.33	467.527	1324	934.324	890.264	AAEL023083
LOC110675455	284.663	476.031	450.125	181.185	198.596	282.194	446.578	228.557	235.102	572.71	487.949	365.779	AAEL025356
LOC110675456	5.53651	5.14716	3.5446	9.49563	4.582	9.28978	17.141	16.9379	17.2869	36.8285	41.9709	11.5781	AAEL021669
LOC110675457	0	0.0389562	0.192145	0.203123	0	0.0739021	0	0	0	0	0	0.0337723	AAEL024402
LOC110675458	0	0.0389562	0.151694	0.203123	0	0.0739021	0	0	0	0	0	0.0337723	AAEL020704
LOC110675459	0.122719	0	0	0.0679904	0	0.260621	0.0571967	0.401662	0.18694	0.503145	0.578031	0.116935	AAEL020925
LOC110675460	4.12206	2.80514	3.92911	2.83357	4.54473	4.85607	4.66466	5.42694	6.12055	3.14093	3.01399	3.12943	AAEL021183				GO:0007093,GO:1990423	mitotic cell cycle checkpoint,RZZ complex
LOC110675461	0	0.170364	0	0.455443	0.318561	0.419205	0.464581	0.414484	0.235523	0.304834	0.515165	0.344126	AAEL023614
LOC110675462	0	0	0	0	0	0	0	0	0	0	0	0	AAEL024215
LOC110675463	0	0.327509	0	0.0795951	0.334647	0.142382	0	0	0	0.0877268	0.0796106	0.0709819	AAEL017998				GO:0009785,GO:0009882,GO:0071949	blue light signaling pathway,blue light photoreceptor activity,FAD binding
LOC110675464	0	0.0461414	0	0	0	0.0471991	0.0310754	0	0	0.290811	0	0.0282362	AAEL025322
LOC110675465	0.474709	0.115788	0.127316	0.314394	0.0346777	0.130185	0.139217	0	0.139032	0.0684472	0.227107	0.0207684	AAEL021225
LOC110675466	713.077	454.368	321.647	364.75	381.983	218.818	969.18	1197.33	1283.7	387.306	436.45	620.609	AAEL025945				GO:0042302	structural constituent of cuticle
LOC110675467	0	0	0	0	0	0	0	0.0196684	0	0	0	0	AAEL020077
LOC110675468	81.6281	64.9345	47.3977	77.7629	61.4594	70.8383	80.4367	73.1016	82.5077	53.5942	78.4372	128.972	AAEL024835
LOC110675469	0	0	0	0	0	0	0	0	0.0940425	0	0	0	AAEL027082
LOC110675470	0.532616	0.903417	0.401297	0.526941	0.492323	0.733139	0.564184	0.251553	0.563434	0.322653	0.468483	0.626558	AAEL026449
LOC110675471	0.849593	8.99227	3.95046	4.2027	6.1844	5.11218	5.93966	0.902837	1.97725	11.6728	3.86724	4.04775	AAEL020561
LOC110675472	0	0	0	0	0.188016	0.15999	0	0	0	0	0.119274	0.106346	AAEL025108
LOC110675473	0.0963555	0.0980622	0.093341	0.745298	0.479743	0	0	0.102394	0.179151	0.105068	0.0953474	0.494621	AAEL023875
LOC110675474	0	0.184663	0.263658	0.179515	0.0943437	0.240842	0.192203	0.0964101	0.159316	0.263147	0.0897752	0.0800447	AAEL024278
LOC110675475	0	0.13207	0	0.128389	0	0	0	0	0	0	0	0	AAEL026379
LOC110675476	0	0.0999141	0	0	0.102092	0.0868737	0	0.208656	0	0	0	0	AAEL022798
LOC110675477	0	0	0.104022	0.423362	0.111665	0.921834	0.0848847	0.170314	0	0	0	0.0169685	AAEL021482
LOC110675478	0.213768	0.507628	0.0690269	1.05745	0.863992	0.882748	0.150959	0.63152	0.502025	0.427345	0.493575	0.27662	AAEL025955
LOC110675479	0	0.142048	0	0.183658	0.0972465	0.43228	0	0.544346	0.0856381	0.278519	0.138116	0	AAEL022269
LOC110675480	0.140866	0.238935	0.454863	5.07289	4.16605	5.46466	0.332252	0.365253	0.54242	0.143363	0.77502	0.20714	AAEL024718
LOC110675481	0	0	0.140618	0.800126	0	1.10885	0	0	0.103417	0	0.0732859	0	AAEL024354
LOC110675482	0.0087908	0.00894651	0.0125232	0.204638	0.457075	0.133613	0.0202669	0.119244	0	0	0.0214912	0.00775599	AAEL020360
LOC110675483	0.187475	0.381591	0.363219	0.864323	0	0.331787	0.945271	0.330712	0.313349	0	0	0.330812	AAEL025941
LOC110675484	0	0.123994	0	0	0.253393	0.323432	0.258115	0	0	0	0	0	AAEL021568
LOC110675485	0.0518954	0.0528146	0.0502719	0	0.323794	0	0	0	0	0	0.154058	0.0457866	AAEL027119
LOC110675486	0	0	0	0	0.445843	0.0948462	0	0	0	0	0	0	AAEL022202				GO:0005739,GO:0005747	mitochondrion,mitochondrial respiratory chain complex I
LOC110675487	11.6741	8.55423	13.5706	12.8433	16.2188	16.0325	9.89281	13.2989	11.9544	7.73963	10.443	8.40469	AAEL027991
LOC110675488	0	0	0	0	0.147577	0	0	0	0	0	0	0	AAEL023333
LOC110675489	0.316218	0.1652	0.135804	0.104283	0.219222	0.205198	0	0.0156816	0	0.394233	0.0865716	0.0306893	AAEL026795
LOC110675490	0.30638	0.171637	0.492842	0.152948	0.0482288	0.143017	0.379621	0.264348	0.208142	0.188496	0.125164	0.0495989	AAEL026559
LOC110675491	0.28383	0	0	0	0.0737883	0.251157	0	0	0.0750633	0.102133	0	0	AAEL027142
LOC110675492	0	0	0	0.0742457	0.104572	0.0664064	0.0397466	0	0.0793874	0	0	0	AAEL023469
LOC110675493	1645.13	1545.85	1512.86	1376.08	1366.4	1435.9	1556.01	1565.13	1619.54	1630.11	1611.22	1715.75	AAEL028043	60S ribosomal protein L28, putative [Source:UniProtKB/TrEMBL;Acc:Q1HRJ1]			GO:0003735,GO:0005840,GO:0006412	structural constituent of ribosome,ribosome,translation
LOC110675494	29.4374	25.0164	22.871	7.17006	24.5516	5.95021	36.089	19.9285	23.7902	12.8722	16.7827	88.859	AAEL024334
LOC110675495	0.448615	2.05452	1.08645	0.88767	10.2633	2.77881	7.60327	1.19182	3.79658	6.11473	8.21255	3.16645	AAEL024781
LOC110675496	0.0580636	0.0195004	0.0140618	0.110294	0	0.0601141	0.12301	0.0721919	0.138202	0.0158284	0	0	AAEL021069
LOC110675497	1.98619	2.76573	2.75148	0	0	0	1.37973	0.112327	1.2228	1.23069	0.690004	0.601678	AAEL026629
LOC110675498	1.68855	1.79428	2.14088	2.23561	2.11743	2.65875	1.63081	2.26936	1.65491	1.73293	1.76918	1.44597	AAEL023076				GO:0003676	nucleic acid binding
LOC110675499	0	0	0	0	0	0	0	0	0	0	0	0	AAEL021723
LOC110675500	0.117606	0.0478755	0.0455705	0.0581763	0.183446	0.0520337	0.124576	0.132475	0.12441	0.0436014	0.344471	0.238652	AAEL022740
LOC110675501	0.111661	0.0454554	0.0432669	0.0552355	0.329767	0.0494034	0.118279	0.125778	0.118122	0.0413974	0.327058	0.291609	AAEL026877
LOC110675502	5.0693	5.38838	2.07341	2.89772	3.74864	4.08701	6.92102	6.46439	4.17092	3.80795	10.3669	11.6287	AAEL023854
LOC110675503	0.0213335	0.0217113	0.020666	0.0844246	0.0443691	1.28368	0.0451958	0	0	2.00057	4.07428	0.0188222	AAEL020037
LOC110675504	0.230431	0.376723	0.440315	0.178416	0.363549	0.2389	0.32117	0.258881	0.378197	0.15237	0.217063	0.29077	AAEL024647
LOC110675505	0.23397	0.396856	0.486455	0.189844	0.328489	0.270587	0.282308	0.215839	0.357906	0.218416	0.230967	0.348997	AAEL020926
LOC110675506	2.00926	1.16849	2.22446	1.84586	2.23866	2.03196	2.12835	2.2877	2.58099	2.34743	1.13614	1.51949	AAEL026119
LOC110675507	0.480432	1.33603	0.944764	1.10391	1.04041	1.23287	0.367685	0.468421	0.495524	1.00452	0.792738	0.317908	AAEL022507
LOC110675508	0.107639	0.0109546	0	0.106492	0	0	0	0.114385	0	0.234743	0.106513	0	AAEL027032
LOC110675509	0.156001	0	0.0204216	0.15851	0.111803	0.128715	0.111653	0.0537656	0.0245311	0	0	0.0557988	AAEL023442
LOC110675510	0.152211	0.0523335	0.0199256	0.0854697	0.0855586	0.125589	0.108941	0.0262298	0.0239352	0	0	0.0544434	AAEL023355
LOC110675511	0.163757	0.124993	0.396585	0.202515	0.085145	0.189827	0.130097	0.043505	0.201816	0.089282	0.0810219	0.1806	AAEL027971
LOC110675512	1.45302	0.356942	1.31049	0.743555	0.573133	0.975401	1.0084	1.17137	0.901055	0.983422	0.44622	0.663092	AAEL020727
LOC110675513	0.600742	0.349362	0.0831354	0.0849059	0.178488	0.227823	0.818162	0.364795	0.45393	0.748641	0.169845	0.605744	AAEL024984
LOC110675514	1.3648	1.62196	1.14724	1.14641	0.835064	1.10172	0.554957	0.349015	0.564465	1.39411	0.900055	0.536813	AAEL021546
LOC110675515	0.7012	0.731229	0.787794	0.41598	0.460625	0.496079	0.628665	0.546102	0.638354	0.61555	0.534202	0.38814	AAEL026079
LOC110675516	0.205691	0	0	0	0.106948	0	0	0.109291	0.217592	0.336434	0	0	AAEL026793
LOC110675517	0.309495	0.149899	0.519253	0.1697	0.333475	0.306863	0.363387	0.229828	0.268233	0.178905	0.175268	0.128307	AAEL023677				GO:0003676,GO:0003746,GO:0004252,GO:0006414,GO:0006508,GO:0016491,GO:0016627,GO:0050660,GO:0055114	nucleic acid binding,translation elongation factor activity,serine-type endopeptidase activity,translational elongation,proteolysis,oxidoreductase activity,oxidoreductase activity, acting on the CH-CH group of donors,flavin adenine dinucleotide binding,oxidation-reduction process
LOC110675518	0.157705	0.11725	0.118924	0.0196199	0.0461547	0.0559875	0.0590185	0.111391	0.0199797	0.0638433	0.134563	0.0474912	AAEL027950
LOC110675519	41.9607	39.4355	31.2127	29.7158	23.2408	31.866	39.4564	38.7439	34.5307	37.9472	32.7693	35.86	AAEL020128				GO:0005515	protein binding
LOC110675520	1.55145	4.24331	0.149593	2.60234	3.31876	3.56468	4.27263	7.40867	8.73647	6.17084	10.607	7.13204	AAEL024417
LOC110675521	18.4748	13.9721	15.2697	20.7932	18.9474	19.0477	19.3005	27.0173	27.5226	19.2212	20.5457	15.1037	AAEL020929				GO:0000166,GO:0003677,GO:0005524,GO:0006260,GO:0016887	nucleotide binding,DNA binding,ATP binding,DNA replication,ATPase activity
LOC110675522	0	0	0	0	0	0	0	0	0	0	0.0174613	0	AAEL027310
LOC110675523	0	0	0	0	0	0	0	0	0	0	0	0	AAEL023793
LOC110675524	0.653723	0.618297	0.975719	0	0	0.0581613	0.184407	0.454948	0.762958	0.226634	0.175784	0.75701	AAEL026224
LOC110675525	0.114419	0.578754	0.0876792	0.849847	0.626886	0.528907	0.555354	0.508138	0.428156	0.124765	0.371775	0.527353	AAEL025435
LOC110675526	1.74597	2.17224	2.92709	1.0313	1.13206	1.35397	0.685065	1.05546	0.721389	2.95587	2.00047	0.61438	AAEL021586				GO:0005515	protein binding
LOC110675527	2.54384	2.33544	2.89507	1.79515	1.81288	1.57413	2.30644	2.69381	3.01094	2.56048	2.18277	2.44843	AAEL026060				GO:0005515	protein binding
LOC110675528	0.0935791	0.065872	0.0377714	0.0524631	0.17354	0.225648	0.0826046	0.168226	0.137766	0.0280611	0.11575	0.0227049	AAEL020710
LOC110675529	0	0.0153202	0	0	0	0	0	0	0	0	0	0	AAEL027511				GO:0003677	DNA binding
LOC110675530	2.85654	1.45357	5.13904	3.22983	3.60703	3.70129	1.29679	1.08413	0.647534	0	0.807616	1.44016	AAEL020890
LOC110675531	1.45826	1.06854	2.42973	1.26959	1.21314	1.60008	1.23575	0.681844	1.1107	0.127209	0.2886	0.720494	AAEL024237
LOC110675532	0.661532	0.493716	0.982614	1.39623	1.37585	1.40491	0.700741	0.46866	0.653155	0.721347	1.26558	0.778212	AAEL012634				GO:0005515	protein binding
LOC110675534	0	0	0	0.0731117	0.0768472	0.0653922	0.234837	0	0.117262	0.120872	0.109689	0.0652001	AAEL026765
LOC110675535	276.431	381.995	167.328	188.51	226.058	157.854	307.778	239.685	226.375	341.071	308.408	280.006	AAEL024066
LOC110675536	0	0	0	0	0.313546	0.266808	0	0	0	0.410975	0.223772	0	AAEL027526
LOC110675537	0.0630096	0.094501	0.0385505	0.131238	0.0724205	0.038149	0.0941444	0.0352413	0.0694619	0.0433938	0.0590688	0.0339406	AAEL020731				GO:0003676,GO:0008270	nucleic acid binding,zinc ion binding
LOC110675538	0	0.0802881	0	0.1561	0.164076	0	0	0	0	0	0	0	AAEL024347
LOC110675539	0	0	0	0.274915	0	0	0	0.145442	0	0	0	0	AAEL021636
LOC110675540	0	0	0	0	0.0296455	0.0594623	0	0	0	0	0	0	AAEL024859
LOC110675541	0.401838	0.130241	0.619851	0.484918	0.488401	0.60358	0.813353	0.724849	0.383121	0.732613	0.54833	0.263079	AAEL020228
LOC110675542	13.0977	6.37702	8.42252	11.4033	11.5069	13.1365	5.91986	6.38878	3.64393	6.09394	3.01645	5.13097	AAEL023449
LOC110675543	0	0	0	0	0	0.111556	0	0.133969	0	0	0	0.111228	AAEL027156
LOC110675544	0	0	0.0155747	0	0	0	0.0340613	0	0	0	0	0	AAEL022563
LOC110675545	0	0	0	0	0	0.0593966	0.110331	0	0.0416251	0	0.0320655	0.0204214	AAEL025823
LOC110675546	0	0	0	0	0	0.0904681	0.181231	0	0	0	0.028905	0.0184086	AAEL021247
LOC110675547	0	0.0697781	0.0664186	0	0	0	0.0726274	0.0364303	0.145062	0	0.0447786	0	AAEL024723
LOC110675548	0	0	0	0	0	0	0	0	0	0	0	0	AAEL028175
LOC110675549	0.582061	0.817472	0.966602	0.274767	0.977098	0.319335	1.06224	0.949016	0.849721	0.286518	0.398243	1.07551	AAEL023683
LOC110675550	0.231838	0.269651	0.201485	0.334222	0.197002	0.406783	0.122088	0.391372	0.18499	0.35681	0.102252	0.619486	AAEL022683
LOC110675551	1.48554	1.84447	2.67091	7.43971	4.66532	6.1047	10.9868	4.64122	5.40596	3.30453	7.7969	2.38543	AAEL027144
LOC110675552	0.606634	0.128621	2.44856	0.500142	0	0.894669	0	0.134303	0	0	0.100048	0.521844	AAEL022541
LOC110675553	0.0203223	0	0	0.201057	0.21133	0.201408	0	0	0.214981	0.243758	0	0.021516	AAEL021943
LOC110675554	0.376662	0.2719	0.15274	0.769853	0.467598	1.07613	0.309292	0.477839	1.46718	0.609713	0.63565	0.128808	AAEL025499
LOC110675555	2.10219	2.07631	1.96094	0	0.0281112	0	1.03086	0.55426	0.886503	1.68539	0.876453	1.06205	AAEL020767
LOC110675556	0.13996	0	0	0.138469	0	0	0	0.148732	0	0.0763078	0.207744	0	AAEL024369
LOC110675557	0.0164613	0.0670116	0.0594363	0.0162859	0.017118	0.0139043	0.0253629	0.0405519	0.0332445	0.0383472	0.108841	0.0310276	AAEL023704
LOC110675558	8.95512	8.63472	3.52243	7.19489	6.30208	5.54143	14.3369	19.6059	17.5404	11.2341	9.99485	16.219	AAEL028195
LOC110675559	1.31963	0.671501	1.91751	0.652783	1.25792	1.9462	0.69892	0.467443	0.465327	1.19912	0.217637	1.16429	AAEL023659
LOC110675560	0.200972	0.217621	0.0778737	0.305403	0.167191	0.284539	0.0987778	0.227235	0.0561264	0.101683	0.0397738	0	AAEL023968
LOC110675561	0.585843	0.19874	0.725158	0.772802	0.846132	0.460803	0.792946	0.691732	0.3443	0.532346	0.257651	0.402018	AAEL020423
LOC110675562	0.822288	0.537977	0.568973	0.58109	0.30539	0.415788	0.497728	0.374495	0.807733	0.320228	0.464963	0.207283	AAEL027087				GO:0016274,GO:0018216	protein-arginine N-methyltransferase activity,peptidyl-arginine methylation
LOC110675563	20.1068	17.7833	27.4776	14.5642	23.2737	21.393	24.5948	21.7485	25.3217	18.9233	17.1725	20.1686	AAEL023481
LOC110675564	1.71255	1.4939	1.10598	1.04885	0.932836	1.08243	1.0366	1.12659	1.46657	1.60063	1.29115	1.36706	AAEL025731
LOC110675565	0.497832	0.480237	0.406071	0.583564	0.286244	0.336134	0.485685	0.292514	0.332788	0.171515	0.233471	0.208166	AAEL022338
LOC110675566	0.0703192	0	0.0340596	0.149575	0.0731245	0.099559	0	0.0747262	0.115301	0.0766775	0.059146	0.0620416	AAEL021336
LOC110675567	0	0	0	0	0	0	0	0.143972	0	0	0	0.0788921	AAEL025147
LOC110675568	3.87374	3.79073	2.45359	3.68507	2.55641	3.62557	3.31424	3.16655	2.99461	3.08677	2.58005	3.22057	AAEL022382
LOC110675569	7.11279	4.75691	9.25264	2.61374	2.95862	6.47382	0.645803	1.94363	0.859925	0.886391	0.402193	2.6895	AAEL026016
LOC110675570	0.225914	0.334545	0.201764	0.0503631	0.0847672	0.0294415	0.258335	0.275429	0.305859	0.635625	0.729254	0.30764	AAEL026336				GO:0003676,GO:0003677	nucleic acid binding,DNA binding
LOC110675571	25.3657	12.2282	22.1293	31.1125	10.7979	23.6271	17.5985	32.9455	35.9348	14.881	15.4125	26.0443	AAEL023709
LOC110675572	0.206737	0.841596	0.300404	0.306801	0.322477	0.182938	0.328486	0.768927	0.874796	1.35258	0.306861	1.00321	AAEL023926
LOC110675573	2.02854	1.21991	1.07186	2.18937	1.63004	0.89751	1.85575	2.54761	2.53608	3.41848	1.73359	2.27786	AAEL027407
LOC110675574	0	0	0	0	0	0	0	0	0	0	0	0
LOC110675575	0	0	0	0	0	0	0	0	0	0	0	0	AAEL026266
LOC110675576	0.168124	0.408011	0.476063	0.422228	0.309316	0.44631	1.02743	0.810841	0.77981	0.620485	0.755039	0.661793	AAEL022079
LOC110675577	6.55087	8.29659	3.66653	5.4729	2.5735	2.96279	5.85972	7.11611	6.77591	4.92087	5.61802	9.24757	AAEL019884
LOC110675578	1.27813	0.975576	1.77983	2.21289	2.32596	5.51361	1.18465	1.35823	2.87318	2.09055	1.89714	1.83247	AAEL020883
LOC110675579	0	0	0.0782065	0	0	0.0492681	0	0	0	0.0758897	0.0743781	0	AAEL024445
LOC110675580	0	0	0	0	0.0388046	0	0	0	0	0	0	0	AAEL014018
LOC110675581	0	0.0214128	0.0515541	0	0.0424719	0.0219036	0.0183541	0	0	0.033739	0.033067	0	AAEL025338
LOC110675582	14.7241	14.2928	16.3807	13.1393	15.1816	15.9395	14.3031	16.0597	16.633	13.6191	12.3866	13.7254	AAEL025065
LOC110675583	0	0	0	0	0	0	0	0	0	0	0	0	AAEL020312
LOC110675584	0.102431	0.0469103	0.0198452	0.265509	0.305704	0.273731	0	0	0	0.0223385	0	0.0451865	AAEL027525
LOC110675585	0	0.351738	0	0.683868	0.179702	0	0.183051	0	0	0.376867	0	0.152466	AAEL024048
LOC110675586	0.0672032	0.205181	0.130201	0.0664872	0.349421	0.178401	0.0711863	0.0714149	0.284367	0.219839	0.1995	0.177877	AAEL026179
LOC110675587	0	0	0.0643348	0	0	0	0	0	0	0.0477956	0.0657178	0	AAEL021633
LOC110675588	0.338244	0	0	0.0191223	0.0717832	0.335957	0.162328	0.333034	0.417694	0.216781	0.230878	0.174184	AAEL024285
LOC110675589	0	0	0	0.349058	0	0	0	0	0	0	0	0	AAEL020711
LOC110675590	28.2377	29.1904	35.1082	29.9166	26.5896	36.005	36.2705	31.1888	39.9856	38.5493	36.963	33.5452	AAEL023158
LOC110675591	0.137685	0	0	0.975318	0	0.121835	0.29169	0.828134	0	0.399357	0.272488	0.0607385	AAEL026583
LOC110675592	0	0	0	0	0	0	0	0.140233	0	0	0	0.0768429	AAEL026366
LOC110675593	3.80492	1.81305	3.11063	4.76532	4.82582	4.70979	5.73115	3.6928	3.48995	2.734	4.20039	4.0556	AAEL023552				GO:0000166,GO:0005525,GO:0005739,GO:0005743,GO:0016020	nucleotide binding,GTP binding,mitochondrion,mitochondrial inner membrane,membrane
LOC110675594	0.139289	0.212634	0.134931	0.206707	0.0724228	0.184882	0	0	0.221022	0.227825	0.0689158	0.0614462	AAEL027126
LOC110675595	0.0892394	0	0.212189	0.102335	0.134981	0.109476	0.0300773	0	0.0300373	0.117212	0.0501738	0.0304202	AAEL022614
LOC110675596	22.6325	27.5894	19.2207	18.7278	27.9896	21.2253	27.8378	26.224	24.5852	32.4231	25.7045	21.9919	AAEL020445
LOC110675597	0.0506537	0.0515509	0.0327126	0	0.0351163	0	0.0715412	0	0.035723	0	0.0334158	0.029794	AAEL025809
LOC110675598	0.346965	0.313367	0.400131	0.429457	0.593535	0.507055	0.171037	0.217874	0.328112	0.186712	0.234092	0.334614	AAEL027426
LOC110675599	3.66439	6.36173	4.21083	1.15158	2.89155	1.02999	2.35178	1.4889	2.94151	5.75854	7.80667	5.99062	AAEL024870				GO:0016747	transferase activity, transferring acyl groups other than amino-acyl groups
LOC110675600	2.48852	2.69259	2.16427	0	0.022595	0.0282749	1.26182	0.547367	0.847756	2.13654	1.04595	1.05099	AAEL021818
LOC110675601	3.71598	2.9414	3.99969	3.83978	4.72293	4.89578	3.5426	3.77335	3.66892	2.92642	2.81911	2.6957	AAEL025376				GO:0003676	nucleic acid binding
LOC110675602	2.7363	10.5854	5.49516	7.52777	7.97895	7.79493	8.32255	7.79662	3.63098	3.76018	4.62363	3.09893	AAEL022962
LOC110675603	2.7363	10.5854	5.49516	7.52777	7.97895	7.79493	8.32255	7.79662	3.63098	3.76018	4.62363	3.09893	AAEL026594
LOC110675604	1.67315	5.13168	2.82715	4.08917	3.36857	4.05628	5.61638	4.57085	2.18214	3.69052	3.92365	1.42901	AAEL024193
LOC110675605	0	0.289667	0	0	0	0.083114	0	0	0	0	0	0	AAEL027634
LOC110675606	0.551037	0.336479	1.92167	0.545166	1.37525	1.17025	0.233479	0.585571	1.74876	0.48069	0.872436	0.0972344	AAEL023313
LOC110675607	3218.42	1927.79	6826.94	9866.02	6117.39	11184.1	3177.25	3301.14	3185.01	4044.65	4234.42	2529.39	AAEL020585
LOC110675608	2.88747	1.67921	2.13115	3.12877	3.00266	3.6501	0.582591	1.46115	0.290908	0.449793	0.952419	0.970502	AAEL024460
LOC110675609	59.0661	41.8852	42.7012	21.8415	17.7122	22.1875	52.6554	51.8922	53.5133	26.3048	34.0707	40.7618	AAEL021795
LOC110675610	322.567	274.006	226.206	208.229	106.607	161.846	385.425	318.436	344.655	235.712	240.547	254.561	AAEL026008
LOC110675611	95.9824	74.7684	56.7225	53.5912	30.6352	50.7142	91.45	77.8383	79.574	52.1313	63.3671	59.4657	AAEL026833
LOC110675612	1932.59	1478.99	2870.58	1049.51	1074.06	1290.35	844.453	786.116	807.525	1092.89	1004.74	947.913	AAEL022334
LOC110675613	35.7886	35.0623	33.5181	31.4772	46.5204	36.038	45.6568	49.1568	48.738	38.5388	47.574	37.8319	AAEL021473				GO:0003677,GO:0005829	DNA binding,cytosol
LOC110675614	41.4357	24.6166	37.3155	50.7793	41.0318	52.3271	33.3782	34.7761	38.2531	29.1377	31.0092	30.8019	AAEL022774				GO:0005634	nucleus
LOC110675615	0	0.106719	0	0	0	0.185581	0	0	0.110929	0.114344	0.311295	0	AAEL026195
LOC110675616	2.44846	4.56412	4.38069	4.05995	4.68958	5.99686	2.8847	3.3785	2.77184	3.22834	3.39322	2.2558	AAEL023898
LOC110675617	1.59854	3.0415	3.2317	3.91938	4.33645	4.12056	2.13501	3.54515	1.58074	2.50093	2.20078	1.49253	AAEL027381
LOC110675618	0.218592	0.431024	0.580668	0.449422	0.51323	0.243297	0.423299	0.152441	0.196916	0.242082	0.370085	0.281757	AAEL023460
LOC110675619	0.442979	0.488007	0.931236	1.03014	0.91418	0.432397	0.445047	0.203826	0.359912	0.403358	0.479016	0.376732	AAEL025160
LOC110675620	2.11782	1.26454	0.623226	0.729379	4.35581	0.813626	1.80462	1.41723	1.46047	0.954436	0.500009	2.39473	AAEL024790
LOC110675621	0.167428	0.182145	0	0.451236	0.198122	0.158372	0.428089	0.454004	0.574098	0	0	0.0865938	AAEL027234
LOC110675623	0	0	0.212597	0	0	0	0	0	0	0	0	0	AAEL023480
LOC110675624	2.31687	1.5158	0.961879	4.09318	2.2372	2.78236	2.98009	3.51724	3.85145	2.52636	3.11143	2.77419	AAEL021857
LOC110675625	0.169352	0.342131	0.244856	1.0703	1.00671	2.09576	1.27982	1.14963	0.609648	1.14382	2.65127	1.30461	AAEL024507
LOC110675626	0	0	0	0	0.0678644	0.0577484	0	0.138702	0.069037	0	0	0.0575787	AAEL026277
LOC110675627	0	0.0768284	0	0	0	0.0668011	0.0799656	0	0	0.0823172	0	0	AAEL022696				GO:0004984,GO:0005549,GO:0007608,GO:0016020	olfactory receptor activity,odorant binding,sensory perception of smell,membrane
LOC110675628	0	0.0106609	0.0295973	0.0708191	0	0.084198	0.0480838	0.0129872	0.0461729	0.00951881	0	0	AAEL027448
LOC110675629	0	0	0	0	0	0.205518	0	0	0.122846	0	0	0.0512286	AAEL023846				GO:0005737,GO:0030030	cytoplasm,cell projection organization
LOC110675630	0.0439472	0.0338831	0	0	0	0	0.141067	0	0	0	0	0	AAEL027226
LOC110675631	0	0	0	0	0.185703	0.316043	0	0	0	0	0	0	AAEL022730
LOC110675632	62.4763	316.634	92.0687	332.699	107.845	225.837	205.94	15.5954	29.571	1431.39	385.32	27.8692	AAEL025106				GO:0042302	structural constituent of cuticle
LOC110675633	0	0	0	0	0	0	0	0.131682	0	0	0	0	AAEL020475
LOC110675634	15.3234	11.8174	24.5421	24.8963	24.8228	27.7818	27.6298	24.8598	26.5124	18.8626	18.162	24.2151	AAEL021952				GO:0005634	nucleus
LOC110675635	0	0.176771	0	0	0	0	0	0	0	0	0	0	AAEL025492
LOC110675636	0.0263242	0.0878726	0.0142803	0	0.0218995	0.0764038	0.0223075	0.0279739	0.0813141	0.019519	0.0437619	0.0315866	AAEL026882
LOC110675637	5.2055	3.24926	4.43752	2.60935	4.47488	2.94801	3.38193	2.58147	1.83556	4.91935	3.1593	4.28655	AAEL022351
LOC110675638	0	0.281774	0.268208	0.27392	0	0	0.29328	0	0	0.301904	0.273973	0	AAEL022836
LOC110675639	0	0	0	0	0	0	0	0	0	0	0	0	AAEL026370
LOC110675640	0.16482	0	0	0	0.0856974	0.218769	0	0	0	0	0	0	AAEL020742
LOC110675641	0.282646	0.431479	0.513381	0.803949	0.918506	1.43813	0.523947	0.825989	0.411125	0.423779	0.524417	0.592264	AAEL020456
LOC110675642	0.28756	0.310233	0.0984323	0	0	0.142064	0.0807253	0.0896228	0.142963	0.110799	0.234277	0.112063	AAEL024071
LOC110675643	5.64283	4.67626	6.1691	4.98456	5.80507	6.00974	6.51097	6.5747	6.24648	6.48268	6.18206	4.55185	AAEL004896				GO:0002098,GO:0005515,GO:0005634,GO:0005737,GO:0008033,GO:0033588	tRNA wobble uridine modification,protein binding,nucleus,cytoplasm,tRNA processing,Elongator holoenzyme complex
LOC110675644	0.0196518	0.0729407	0.167973	0.161257	0.201953	0.0695582	0.0612251	0.369758	0.1871	0.213026	0.185311	0.0887322	AAEL023213
LOC110675645	0	0.151407	0.144118	0	0.154707	0.197469	0	0	0.15738	0.162224	0.147216	0	AAEL026590
LOC110675646	0.0538481	0.109604	0	0.0532743	0.111992	0.190597	0.228158	0.114445	0	0.058717	0	0.0950186	AAEL023162
LOC110675647	0	0	0	0	0.0936746	0	0	0	0	0	0	0	AAEL027476
LOC110675648	0.784892	1.76887	0.882234	2.65794	3.30407	4.33286	0.869734	1.41744	1.62567	2.06676	1.2016	1.13659	AAEL024014
LOC110675649	0	0	0	0	0	0	0	0.0195615	0	0	0	0	AAEL024099
LOC110675650	0	0.0330915	0.0787458	0	0.0236689	0	0.02411	0	0.0498756	0	0.0193053	0	AAEL023733
LOC110675652	0.948097	0.335614	0.798639	1.30504	1.20025	1.56848	0.873296	1.35795	1.09017	0.629284	0.448694	0.727384	AAEL027655
LOC110675653	0.177023	0.0982684	0.0882368	0.159215	0.0502051	0.0569618	0.102281	0	0.0851208	0.0291299	0.0318493	0.141986	AAEL022378				GO:0003676,GO:0003677	nucleic acid binding,DNA binding
LOC110675654	0	0	0	0	0	0.0615429	0	0.0739078	0	0.227513	0.0688215	0.368173	AAEL026514
LOC110675655	0.310738	0.368422	0.150508	1.29427	0.618802	1.48895	1.15204	0.82553	0.821794	0.338835	0.888637	1.24468	AAEL021002
LOC110675656	5.35381	5.01908	7.25223	6.26381	11.4582	6.80156	7.62425	7.74316	7.19111	6.05591	5.71546	10.1136	AAEL018011				GO:0005509,GO:0005515	calcium ion binding,protein binding
LOC110675657	34.5125	29.4701	35.7564	31.5259	30.9654	38.2487	35.1495	38.0094	41.4922	32.6868	33.1922	31.5793	AAEL023802
LOC110675658	0.0859104	0.188431	0.203752	0.171456	0.0770152	0.403697	0.156901	0.118053	0	0	0	0	AAEL027223
LOC110675659	0.186397	0.0839376	0.151803	0.119133	0.183541	0	0.034946	0	0.0575843	0.131304	0.0930397	0.208116	AAEL027588
LOC110675660	1.23486	2.09336	2.16346	0.813304	0.245818	1.14578	2.11904	2.18583	0.933078	1.47347	1.80498	0.62257	AAEL027807
LOC110675661	0	0	0	0	0	0	0	0	0	0	0	0	AAEL021680
LOC110675662	0.21437	0	0	0.106043	0.334383	0.0948462	0.227075	0	0.226773	0	0.403041	0.189135	AAEL025127
LOC110675663	0.114427	0.0465816	0.0443389	0.0566039	0.178488	0.0506274	0.121209	0.128894	0.121048	0.042423	0.335161	0.232202	AAEL026669
LOC110675664	0.0397767	0	0	0	0.142892	0	0	0.096067	0	0	0.329197	0.0350943	AAEL025952
LOC110675665	1.14354	0.783777	0.994722	1.20062	1.09208	0.681481	2.17542	1.7856	2.09846	0.839771	0.808265	1.37955	AAEL028005				GO:0035556	intracellular signal transduction
LOC110675666	0.137313	0	0	0	0.571162	0.486023	0	0	0	0	0	0	AAEL023507
LOC110675667	152.306	147.623	126.105	146.583	159.69	134.184	177.639	197.477	188.754	173.179	188.134	173.358	AAEL024853				GO:0005741,GO:0006886	mitochondrial outer membrane,intracellular protein transport
LOC110675668	0	0.0374185	0.184561	0.148809	0	0.0709849	0	0.0497273	0	0	0	0.0324392	AAEL020224
LOC110675669	2.00965	2.12337	1.41305	1.12592	1.62959	1.13891	1.51644	1.12778	1.83928	1.28034	1.98862	1.02799	AAEL022134
LOC110675670	0	0	0	0	0	0	0	0	0	0	0	0	AAEL022937
LOC110675671	0.0780425	0	0	0	0.162312	0.0690585	0	0	0	0	0	0	AAEL020943
LOC110675672	0	0.0911914	0	0.0886496	0.83861	0.317158	0	0	0	0	0	0	AAEL024296
LOC110675673	0	0.217708	0	0	0	0.189293	0	0	0	0	0	0	AAEL021794
LOC110675674	0.0604829	0.738651	0.0585907	0	0.0830224	0.0706469	0	0	0	0	0	0	AAEL025354
LOC110675675	0.42874	0	0.207663	0	0	0.569077	0.567689	0.227804	0.737014	0.467506	0.212127	1.32395	AAEL022267
LOC110675676	2.45795	0	0.972651	1.06091	0.417648	0.355392	0.140392	0.781036	0.424864	0	0.198712	0.517348	AAEL026524
LOC110675677	0	0.237181	0	0.594871	0.242351	0	0	0.0693445	0	0	0.525803	0	AAEL024001
LOC110675678	0	0	0	0	0.0672169	0	0	0	0	0	0	0	AAEL027651
LOC110675679	0.204667	0.242599	0.151614	0.0952878	0.142723	0.178976	0.239753	0.314726	0.0356604	0.141781	0.29545	0.19757	AAEL026103
LOC110675680	4.35687	3.15886	4.84565	4.08094	3.07821	3.8481	3.28785	5.83644	3.97473	4.2752	5.64008	3.4707	AAEL027733
LOC110675681	5.42332	4.45966	5.29567	4.2495	4.60197	6.87218	5.23922	6.22426	4.91097	3.73745	4.2074	4.36384	AAEL019645				GO:0003676,GO:0005634,GO:0008270	nucleic acid binding,nucleus,zinc ion binding
LOC110675682	4.20304	3.55494	5.0069	3.17488	3.42569	4.27206	2.5269	3.50073	4.26598	2.84894	2.61347	3.60805	AAEL023280				GO:0003676,GO:0005634,GO:0008270,GO:0046872	nucleic acid binding,nucleus,zinc ion binding,metal ion binding
LOC110675683	0.0819446	0	0	0	0	0	0	0	0	0	0	0	AAEL021918
LOC110675684	0	0.13715	0.130547	0.266654	0.0140139	0.476999	0.014275	0	0	0.0249812	0	0.250878	AAEL024422
LOC110675685	0.43233	0.162543	0.320105	0.953523	0.57271	0.677403	0.752561	0.65841	0.632126	0.510456	0.645797	0.575801	AAEL025741
LOC110675686	0	0	0	0	0	0	0	0	0.0600201	0	0	0	AAEL022115
LOC110675687	0	0	0	0	0	0	0	0	0	0	0.438119	0	AAEL026870
LOC110675689	22.512	237.982	115.551	140.037	231.704	100.736	238.385	0.20412	17.4748	109.856	30.9818	18.3029	AAEL023487				GO:0042302	structural constituent of cuticle
LOC110675690	0.0243982	0	0.0458795	0.0709948	0	0.0253995	0	0.0381283	0	0.0312991	0.142017	0	AAEL023887
LOC110675691	0.277893	0.269862	0.168506	0.218267	0.086032	0.165187	0.195493	0.133002	0.166061	0.0277576	0	0.196519	AAEL021684
LOC110675692	0.0775538	0.12564	0.168653	0.195733	0.0444385	0.0882336	0.0486196	0.0235469	0.130596	0.0707594	0.0971026	0.0963529	AAEL024375
LOC110675694	0	0.242749	0	0.117991	0	0.458014	0	0.126736	0.547546	0.304307	0	0.140999	AAEL025263
LOC110675695	0	0	0	0	0	0	0	0	0	0	0	0	AAEL022719
LOC110675696	0.0189599	0.0228691	0	0.0597475	0.0540373	0.0223698	0.0431428	0.0932786	0	0.0635543	0.0576745	0	AAEL021512
LOC110675697	0.109495	0.186095	0.0710664	0.0725799	0.329064	0.0726678	0.270244	0.0779592	0.222394	0.179093	0.135437	0.0483028	AAEL023857
LOC110675698	0.146837	0.149438	0.0938805	0.145273	0	0.389802	0	0	0	0	0	0.259104	AAEL026255
LOC110675699	1.28855	0.562017	0.713278	0.728468	0.382844	1.14022	0.389977	0.782459	0.973647	0.401445	0.546458	2.27373	AAEL024482
LOC110675700	0.238804	0.364551	0.347	0.23626	0.0409746	0.193353	0.294696	0.25377	0	0.0650993	0.0685287	0.31604	AAEL024729
LOC110675701	0.0297806	0	0.0288489	6.96865	4.58335	6.53222	1.56719	1.86084	3.4276	3.75391	2.9245	2.89129	AAEL023405
LOC110675702	0.0496634	0.050543	0	0	0	0.0219732	0.0263035	0	0	0.0541539	0	0	AAEL027976
LOC110675703	0.185636	0.106063	0.0946464	0	0.221829	0.134007	0.243211	0.105557	0.163648	0.266344	0.0499518	0.0459744	AAEL022144
LOC110675704	0	0	0	0.116894	0.122866	0	0	0	0.624945	0.289881	0	0.781832	AAEL026335
LOC110675705	0.601425	0.501983	0.353059	0.254825	0.401768	0.797718	0.522481	0.775973	0.238414	0.550484	0.679242	0.113625	AAEL022924
LOC110675706	0	0	0.844912	0	0	0	0	0.231715	0.230667	0.237766	0	0.192382	AAEL021508
LOC110675707	0	0	0.191929	0	0	0	0	0	0	0	0.232465	0.0824081	AAEL025963
LOC110675708	0.724071	0.30704	0	0.417874	0.250986	0.444232	0.0639155	0.320604	0.5949	0.768487	0.477664	1.38415	AAEL023245
LOC110675709	0.0182179	0	0.0615877	0.122856	0.0610869	0.0911315	0.0248113	0.0225204	0.0381507	0.111894	0.0492992	0.0570769	AAEL027871
LOC110675710	1.44251	1.68984	1.58684	1.28276	1.11859	1.83826	1.96338	2.35212	1.62102	1.92748	1.22799	1.50001	AAEL024478
LOC110675711	2.71903	10.5563	5.17038	4.28417	12.9856	4.3665	7.89385	0.963145	2.76983	6.1494	3.38815	5.77528	AAEL020676				GO:0005549	odorant binding
LOC110675712	0	0.0430879	0.0832698	0	0	0	0	0.0790758	0.0447878	0	0	0	AAEL025625
LOC110675713	0	0	0	0	0	0	0	0	0	0	0	0	AAEL021872
LOC110675714	1.5713	4.47139	2.65659	1.69919	2.86591	3.66372	2.27029	0.579795	0.97181	9.13133	7.15378	3.58248	AAEL023615
LOC110675715	1.60553	1.99522	1.58151	1.12208	1.5204	1.91036	1.54135	1.29932	1.30081	1.25906	1.14906	1.19955	AAEL028210				GO:0008488,GO:0016020,GO:0016021,GO:0017187	gamma-glutamyl carboxylase activity,membrane,integral component of membrane,peptidyl-glutamic acid carboxylation
LOC110675716	0	0.0667821	0.0963134	0	0.10339	0.0580659	0	0.175387	0.140937	0.0433655	0.0334505	0.0350881	AAEL023696
LOC110675717	0.140089	0.0475235	0.231605	0.0831579	0.0640982	0.0330567	0	0	0.0652057	0.203675	0	0.0543833	AAEL024212
LOC110675718	20.3076	25.088	15.3401	14.1618	18.4685	14.2234	24.6369	21.2102	21.0367	22.4436	19.4059	23.1887	AAEL020884
LOC110675720	29.1569	51.1961	42.4277	9.03767	271.58	25.2469	66.5421	26.4629	28.064	10.5068	25.1371	331.219	AAEL022409
LOC110675721	0.126618	0.109532	0.226916	0.300646	0.088877	0.137252	0	0.0975514	0	0.0690336	0.119029	0.0837851	AAEL027085
LOC110675722	35.7416	168.145	153.224	66.1281	395.234	71.9314	153.096	5.2857	15.9357	3.71912	7.59385	254.615	AAEL023616
LOC110675723	190.54	1362.26	837.759	423.076	950.235	410.503	459.301	2.85408	32.3577	511.53	147.5	486.954	AAEL028233
LOC110675724	94.2566	483.635	416.884	117.538	631.021	98.2771	158.478	1.13121	14.9463	2.00493	6.99049	349.806	AAEL024834
LOC110675725	40.5048	253.375	211.325	78.592	311.185	71.2207	186.602	0.927657	14.96	1.90376	3.2825	130.239	AAEL027392
LOC110675726	57.0553	252.877	260.152	78.972	809.299	75.0515	193.63	3.89616	20.944	2.62719	8.70727	437.067	AAEL025917
LOC110675727	93.1429	415.873	392.632	114.611	1005.96	101.121	180.008	11.2866	21.5445	6.08917	12.7852	804.532	AAEL020856
LOC110675728	85.5965	450.996	404.054	96.4	663.357	93.5222	185.756	1.85834	12.7548	2.50903	7.19503	321.422	AAEL027079
LOC110675729	0	0	0.0928607	0.379353	0.0996839	0.254474	0	0	0	0	0	0	AAEL021490
LOC110675730	5.19123	4.36784	3.43636	4.74973	3.40011	6.5308	5.48612	4.19943	4.15914	4.51094	4.61725	4.1239	AAEL021030
LOC110675731	1.01611	0.684593	0.734118	0.662703	0.504712	0.695705	1.03425	0.588155	0.702592	0.714932	0.536444	0.896501	AAEL025501
LOC110675732	0.139576	0	0.202814	0.114614	0.217716	0.144505	0	0	0	0	0.0455782	0.123146	AAEL028083
LOC110675733	15.7324	62.8692	20.4135	30.2728	28.5175	23.181	32.0302	4.67808	7.3289	74.8365	33.5637	16.8731	AAEL024325
LOC110675734	0.236926	0.310743	0.339422	0.260813	0.390388	0.199317	0.422405	0.751777	0.414783	0.105523	0.178312	0.306194	AAEL027368
LOC110675735	4.15235	4.17819	5.01471	2.07898	0.837276	2.43194	2.30537	2.37006	2.41761	2.63515	2.60358	2.49717	AAEL023924
LOC110675736	4.34729	13.5927	11.2639	10.9856	16.2855	6.90578	14.3697	2.22638	3.93393	21.7029	8.13715	8.1332	AAEL026233
LOC110675737	0	0.180069	0	0	0	0	0	0	0	0	0	0	AAEL022737
LOC110675738	0	0.145943	0	0	0	0	0	0	0	0	0	0	AAEL023563
LOC110675739	0.327778	0.37139	1.359	0.252943	0.359033	0.353856	5.61316	2.74709	3.58302	4.98476	2.9905	1.86434	AAEL027775
LOC110675740	18.6494	16.8589	20.6704	22.0606	20.0812	30.9911	16.0027	21.6548	22.5726	26.3698	24.5425	17.6589	AAEL027914				GO:0006897,GO:0016020	endocytosis,membrane
LOC110675741	9.3511	35.4604	17.5401	18.0315	32.3932	12.491	31.2302	2.53175	6.23773	32.4733	13.261	21.7556	AAEL023438
LOC110675742	4.55638	4.17338	4.05838	0.805825	2.54518	0.239058	1.34542	1.05408	1.39482	1.56525	1.87929	2.32308	AAEL025149
LOC110675743	0	0	0	0	0	0.100924	0	0.0918191	0	0	0.11286	0	AAEL020292
LOC110675744	0	0.0140964	0	0.0109628	0.0230458	0.0161787	0	0	0.011722	0	0	0	AAEL022185
LOC110675745	0.0986517	0.190758	0.0450522	0.441991	0.114312	0.29431	0.15227	0.0763793	0.171448	0.126013	0.104592	0.021138	AAEL021445
LOC110675746	0	0.0234227	0.022295	0	0.0239332	0.0203656	0.0207222	0.0207888	0.0206947	0	0.0227742	0	AAEL023419
LOC110675747	0.0162422	0.0548793	0.0314681	0.0482075	0	0.0862349	0.0516147	0.0345202	0.051546	0.0708433	0.0482169	0.100312	AAEL026735
LOC110675748	0.0492389	0.0759259	0.192239	0.934429	1.04734	0.550576	0.486802	0.71352	0.697663	1.04454	0.76334	0.866222	AAEL025077
LOC110675749	0.45243	0	0	0	0	0	0	0	0	0	0	0	AAEL021492
LOC110675750	0	0	0	0	0	0	0.233986	0	0	0	0	0	AAEL025789
LOC110675751	0	0	0	0	0	0	0	0	0	0	0	0	AAEL022019
LOC110675752	0.174991	0	0.452043	1.21188	2.66892	1.60008	0	0	0	0	0	0.205856	AAEL024959
LOC110675753	0.077969	0.701352	0.412977	0.58227	0.299471	0.416187	0.0546161	0.148338	0.123721	0.36613	0.201594	0.179744	AAEL020245
LOC110675754	0	0	0	0	0.106517	0.181279	0.108502	0	0.288231	0.111692	0.101359	0	AAEL021059
LOC110675755	0	0.0962603	0	0.267363	0.0562047	0	0	0.068923	0	0	0.0882471	0	AAEL026963
LOC110675756	0.121003	0.015788	0.0300557	0.125853	0.016132	0.098837	0.0953093	0.0659416	0.0525145	0.0761214	0.0798245	0.0479046	AAEL020448
LOC110675757	0	0.146891	0	0.142796	0.300184	0.383157	0	0.15338	0	0.157385	0	0	AAEL025770
LOC110675758	0.247896	0.285272	0.325845	0.0433313	0.136636	0.0906894	0.417545	0.3258	0.308572	0.493819	0.231434	0.187029	AAEL028223
LOC110675759	0.498961	0.870134	0.704886	1.55806	0.245921	1.80518	1.0433	1.70392	1.65497	1.31769	0.396021	1.00197	AAEL023621
LOC110675760	0.0749366	0.08466	0.0346311	0.0333282	0.0772112	0.197106	0.0888452	0.0452958	0.119272	0.099704	0.0768738	0.115854	AAEL024974
LOC110675761	0.0836528	0.0945071	0.0386592	0.0372047	0.0861919	0.220032	0.0991791	0.0505643	0.133145	0.111301	0.0858153	0.112401	AAEL020389
LOC110675762	0	0	0	0	0.0340855	0.0263678	0	0	0.173372	0	0	0	AAEL026115
LOC110675763	0.345813	0.176745	0.0914963	0	0.264558	0.152328	0.193644	0.157031	0.164378	0.337214	0.120598	0.252687	AAEL021564
LOC110675764	0	0.0713672	0	0.104067	0.0364613	0.0930789	0	0.0372599	0	0	0	0.0309352	AAEL026720
LOC110675765	3.44445	2.80437	2.66935	4.43007	2.14912	4.26712	1.8243	3.66032	3.27937	2.62913	2.38589	5.47017	AAEL022208
LOC110675766	6.0186	4.53733	5.61374	5.32603	8.02389	6.92099	4.5547	7.36623	6.40439	5.48964	4.94313	3.14349	AAEL027886
LOC110675767	0.597189	0.907115	0.284936	0.291004	0.305872	0.19718	1.25573	0.634615	0.546882	1.29265	0.590941	0.723492	AAEL023435
LOC110675768	0	0	0	0	0	0	0	0	0	0	0	0	AAEL024987
LOC110675769	0.018691	0	0.0197523	0.020173	0	0.018043	0.205188	0	0.05033	0	0.0235397	0.0524708	AAEL020374
LOC110675770	0.0183534	0	0.0193955	0.0198086	0	0.0177171	0.0247434	0	0.049421	0	0.0231145	0.051523	AAEL022369
LOC110675771	0.0192711	0	0.0203653	0.020799	0	0.0186029	0.0259806	0	0.051892	0	0.0242703	0.0540992	AAEL026942
LOC110675772	0.0192711	0	0.0203653	0.020799	0	0.0186029	0.0259806	0	0.051892	0	0.0242703	0.0540992	AAEL021900
LOC110675773	0	0	0.046962	0	0.0907428	0.600572	0.273193	0.296737	0.512837	0.211448	0.40296	0.627893	AAEL026502
LOC110675774	0	0	0	0	0	0	0	0	0	0	0	0.213453	AAEL020924
LOC110675775	0	0	0	0	0	0.0348505	0.0550684	0.112165	0	0	0	0.0458675	AAEL025662
LOC110675776	0.0529667	0.0573548	0.0102619	0.0943242	0.113685	0.0967384	0.0336636	0.0225145	0.0672377	0.0462047	0.0104825	0.0871079	AAEL027828				GO:0006508,GO:0008234	proteolysis,cysteine-type peptidase activity
LOC110675777	6.14939	6.70533	3.68767	4.20076	2.89284	2.33207	2.63656	3.88974	3.56237	2.39479	2.02835	2.84193	AAEL024363
LOC110675778	0	0.2184	1.37755	1.3634	0.672169	0.686368	0.684693	1.71723	0.136756	1.45758	1.02339	1.14059	AAEL026965
LOC110675779	3.31521	3.28959	2.89035	0.327989	2.75797	3.1536	2.98495	1.05689	2.27957	0.994118	4.59274	2.33997	AAEL027941
LOC110675780	0.0340749	0.0575662	0.0217858	0.0674236	0.0942551	0.0199005	0	0.0601092	0	0	0.0337184	0.0499058	AAEL026041
LOC110675781	35.5218	36.4728	57.419	30.7806	31.4402	34.9849	17.3995	12.0133	11.2157	23.2074	24.2766	14.7788	AAEL009968				GO:0000166,GO:0009166,GO:0016787,GO:0016788,GO:0046872	nucleotide binding,nucleotide catabolic process,hydrolase activity,hydrolase activity, acting on ester bonds,metal ion binding
LOC110675782	2.48782	3.77199	2.54114	4.0687	3.50222	4.55262	2.36637	3.05738	2.16628	3.5063	3.80154	1.82167	AAEL025123
LOC110675783	0.0603392	0.184224	0.116903	0	0.125493	0.213573	0.0639155	0.0820745	0	0	0.059708	0	AAEL020515
LOC110675784	0.0792223	0.0245382	0.0367036	0.10564	0.0537279	0.0655307	0.166011	0.0311127	0.0200406	0.0619723	0.0340841	0.101806	AAEL023196
LOC110675785	0	0	0	0	0	0	0	0	0	0	0	0	AAEL025139				GO:0004984,GO:0005549,GO:0007608,GO:0016020,GO:0016021	olfactory receptor activity,odorant binding,sensory perception of smell,membrane,integral component of membrane
LOC110675786	0.147691	0.0300614	0	0.0818256	0.162183	0.264515	0.177721	0.104213	0.091242	0.064418	0.0584583	0.0344006	AAEL022250
LOC110675787	0	0	0	0	0	0	0.0701654	0	0	0	0	0	AAEL027944
LOC110675788	1.22899	5.12723	2.26834	6.10753	2.26383	5.33709	8.1026	4.38251	3.98736	6.98838	5.2858	11.0685	AAEL021396
LOC110675789	0.423808	0.293085	0.505048	0.515804	0.634863	1.1358	1.49956	0.806001	1.15638	2.03581	1.00825	0.826906	AAEL022385	pickpocket 201 [Source:VB Community Annotation]	ppk201		GO:0005272,GO:0006814,GO:0016020	sodium channel activity,sodium ion transport,membrane
LOC110675790	0	0.0373056	0.071019	0	0	0	0.0388289	0.0389536	0.0387773	0	0.108818	0.0323413	AAEL024010
LOC110675791	0.068917	0.06621	0.0443293	0.0414551	0.100333	0.0609836	0.0741698	0.00996011	0.0717382	0.0282558	0.0818352	0.0155659	AAEL027599
LOC110675792	0	0.232326	0	0	0.267732	0	0	0	0	0.0935802	0.169845	0	AAEL025303
LOC110675793	0.0332063	0.140247	0.0804186	0.58806	0	0	0.0580378	0.0741034	0.0878191	0.157508	0.12815	0.0483407	AAEL020677
LOC110675794	2.1048	0.615862	1.36965	1.75599	2.15643	3.71167	1.39784	2.68746	2.66234	2.10703	1.539	3.02132	AAEL026681
LOC110675795	0.182347	0.281565	0.344757	0.0833591	0.601558	0.133536	0.186494	0.211148	0.276708	0.216661	0.528874	0.30734	AAEL021651
LOC110675796	0.0799508	0.0727109	0.0845903	0.0336591	0.0678095	0.173105	0.0840889	0.101231	0.0995728	0.106347	0.0735034	0	AAEL027584				GO:0003676,GO:0015074	nucleic acid binding,DNA integration
LOC110675797	1.68132	1.30902	1.77056	1.59847	2.63965	2.13113	1.43066	1.54793	2.83481	1.65441	1.22531	1.35533	AAEL023122
LOC110675798	0.0230776	0	0.0223556	0.345935	0.412333	0.660279	0.0614838	0.0245239	0.295914	0.165474	0.0809645	0.020361	AAEL020645
LOC110675799	0.0237141	0	0.0229722	0.355476	0.423706	0.67849	0.0631796	0.0252003	0.228056	0.170038	0.0831976	0.0209226	AAEL024202
LOC110675800	2.21554	1.16507	1.00902	2.68437	2.23828	2.60934	1.81704	2.52855	2.14339	2.07831	2.39898	2.2043	AAEL022428
LOC110675801	0.0781625	0.0495293	0	0.265547	0.492285	0.807793	0.331181	0.208436	0.516392	0.455096	0.265599	0.766385	AAEL028166
LOC110675802	2.63614	2.48772	2.6001	11.1909	9.81886	12.6813	6.14325	12.7843	11.1212	7.10786	7.06683	11.9674	AAEL023633
LOC110675803	7.5191	7.68738	7.81845	5.11856	5.02141	6.10416	4.9323	3.48202	3.57572	6.0552	5.73391	3.2257	AAEL023679				GO:0004842,GO:0005515,GO:0016567	ubiquitin-protein transferase activity,protein binding,protein ubiquitination
LOC110675804	0.513453	0.196152	0.123974	0.202888	0.160341	0.477541	0.462221	0.163853	0.272397	0.756594	0.431793	0.208141	AAEL028151
LOC110675805	0.177376	0.257883	0.306834	2.0206	0.413701	0.854297	0.75961	0.69473	0.643335	0.436564	0.646919	0.800367	AAEL022425
LOC110675806	1.07545	0.452895	1.69993	0.587028	0.836064	1.00678	4.92287	3.08647	3.12586	6.01226	3.00911	2.63977	AAEL026361				GO:0016788	hydrolase activity, acting on ester bonds
LOC110675807	0	0.0316858	0	0	0	0	0	0	0	0	0	0	AAEL022840				GO:0003677,GO:0005634,GO:0006915	DNA binding,nucleus,apoptotic process
LOC110675808	2.97628	4.83577	2.782	2.47964	3.04072	3.69637	3.48455	2.44146	1.82281	3.30233	3.41017	2.30344	AAEL021139
LOC110675809	0.406695	0.541253	0.697027	0.619019	0.919037	0.802806	0.961016	0.265959	0.264755	0.477582	0.433397	0.386423	AAEL025808				GO:0005515,GO:0019005,GO:0031146	protein binding,SCF ubiquitin ligase complex,SCF-dependent proteasomal ubiquitin-dependent protein catabolic process
LOC110675810	38.5557	29.1472	34.8078	57.4618	52.0352	57.1537	39.4513	53.0902	46.9022	31.2295	44.3565	56.6251	AAEL009183	cytochrome oxidase biogenesis protein (oxa1 mitochondrial) [Source:VB Community Annotation]
LOC110675811	6.38727	5.80571	4.39261	4.58264	5.72943	4.35765	7.07573	5.28498	5.62211	4.164	5.45199	6.23765	AAEL023587				GO:0004252,GO:0006508	serine-type endopeptidase activity,proteolysis
LOC110675812	1.24971	0.698538	2.16234	8.85356	9.30791	7.268	5.22894	7.62802	9.80331	1.78201	7.14492	4.35019	AAEL020088
LOC110675813	0.701884	0.540133	0.984846	0.837026	0.49576	0.501647	1.2868	1.34831	1.22797	0.578721	0.75705	0.881257	AAEL025890
LOC110675814	2.24036	0.894366	1.93644	1.77605	2.04115	2.70766	2.10521	2.08586	2.10241	1.54929	1.19142	1.77515	AAEL021207
LOC110675815	0.0636276	0	0	0.0953782	0	0.170615	0.0408477	0.137279	0.0673091	0	0	0	AAEL027136
LOC110675816	0.486761	0.743074	0.609062	0.381246	0.78036	0.574302	0.687481	0.431055	0.343283	0.486542	0.762641	0.536827	AAEL022509				GO:0005515	protein binding
LOC110675817	0	0	0	0.215611	0.283284	0.144634	0.0577125	0	0.0576357	0.0594096	0.0539132	0	AAEL027221
LOC110675818	0	0	0	0.0148748	0	0	0	0	0	0	0	0	AAEL023642
LOC110675819	0	0	0	0	0	0.123849	0.148256	0.148732	0	0.305231	0.193895	0.123485	AAEL020166
LOC110675820	18.3279	23.9875	16.9908	17.3137	20.5756	19.7058	23.9233	25.9686	21.7233	23.0795	21.6853	16.1356	AAEL024921				GO:0016020,GO:0016021,GO:0016192	membrane,integral component of membrane,vesicle-mediated transport
LOC110675821	3.86335	2.88151	2.84531	1.28279	1.9537	1.61565	1.84996	1.77154	1.84749	2.65456	2.61844	2.45137	AAEL020942				GO:0005524	ATP binding
LOC110675822	0.200417	0	0.388293	0.594844	0.4856	0.354691	0	0	0.424026	0.874153	0.19832	0	AAEL025795
LOC110675823	0.156058	0	0	0.171551	0	0	0	0	0	0	0	0.205002	AAEL026009
LOC110675824	1.43066	1.65222	1.35414	0.476891	0.401005	1.0527	1.31121	0.98964	2.14165	1.1206	1.22489	1.74367	AAEL021324
LOC110675825	0.0669645	0.0088892	0	0	0.0544977	0.022543	0	0.143096	0.0369595	0.0492087	0.0180065	0	AAEL026910
LOC110675826	0	0	0.0103021	0	0	0	0.0143375	0	0	0	0.0315708	0.0852998	AAEL022266				GO:0004497,GO:0005506,GO:0016020,GO:0016021,GO:0016705,GO:0020037,GO:0046872,GO:0055114	monooxygenase activity,iron ion binding,membrane,integral component of membrane,oxidoreductase activity, acting on paired donors, with incorporation or reduction of molecular oxygen,heme binding,metal ion binding,oxidation-reduction process
LOC110675827	0.323088	0.493217	0.938941	0.879026	0.755949	4.35991	0.855594	0.343336	0.170891	0.616528	0.079927	0.498848	AAEL024942
LOC110675828	0.356661	0.168256	0.239333	0.457617	0.295553	0.115064	0.285318	0.163844	0.310485	0.243069	0.329033	0.275342	AAEL020218
LOC110675829	0.153956	0.313367	0.411626	0.0304632	0	0.16675	0.217877	0	0.106839	0	0.0304692	0.1304	AAEL025798
LOC110675830	0.118382	0.0426696	0.0788414	0.112241	0.117975	0.109119	0	0	0.174803	0.045718	0	0.0696311	AAEL022418
LOC110675831	0.923135	0.337945	0.499667	0.256249	1.53548	0.554373	1.21235	0.430506	0.468369	0.523821	0.181819	1.23635	AAEL027271
LOC110675832	0	0	0.0411163	0	0	0	0.0449598	0	0	0.0462819	0	0	AAEL023674
LOC110675833	47.8513	45.0601	46.5383	52.128	42.3389	55.5856	46.8669	54.9964	51.0253	52.481	49.7262	48.5724	AAEL024786				GO:0005789,GO:0016020,GO:0016021,GO:0030054,GO:0033149,GO:0070972	endoplasmic reticulum membrane,membrane,integral component of membrane,cell junction,FFAT motif binding,protein localization to endoplasmic reticulum
LOC110675834	2.75304	1.46157	1.69325	1.33373	1.08526	1.05333	2.09828	3.28421	2.45249	0.973991	1.11801	1.19426	AAEL020052
LOC110675835	0	0	0	0	0	0	0	0	0	0	0	0	AAEL025925
LOC110675836	4.35866	4.10317	7.23068	6.89955	8.626	12.5952	6.11752	8.87283	7.23328	4.09926	4.60958	4.4104	AAEL021196
LOC110675837	12.2786	11.8227	14.4586	8.94719	10.1689	12.1664	9.73533	10.7823	9.10015	12.8277	10.1858	11.6117	AAEL022560
LOC110675838	0.0394027	0	0.03817	0	0	0.0348669	0	0.0418721	0	0.0755151	0	0	AAEL028172
LOC110675839	52.712	51.2774	51.0097	57.3292	50.7557	61.9752	50.7393	59.7195	54.5496	54.6379	55.6468	48.4145	AAEL024800				GO:0005789,GO:0016020,GO:0016021,GO:0030054,GO:0033149,GO:0070972	endoplasmic reticulum membrane,membrane,integral component of membrane,cell junction,FFAT motif binding,protein localization to endoplasmic reticulum
LOC110675840	0.692682	0.2743	0.303521	0.393315	0.24174	0.399486	0.130617	0.312911	0.299377	0.417333	0.571418	0.276441	AAEL026451
LOC110675841	0.254028	0	0.0894839	0	0	0	0	0	0.521167	0	0	0	AAEL023994
LOC110675842	0.0366167	0	0	0	0	0	0	0	0	0.33273	0	0	AAEL027641
LOC110675843	0.911312	0.616757	1.35951	1.21716	0.71075	1.54427	0.603328	1.20085	0.761593	0.660819	0.450889	2.31161	AAEL028183
LOC110675845	0	0	0	0	0	0	0	0	0	0	0	0	AAEL025218
LOC110675846	0	0	0	0	0.0835957	0	0	0	0	0	0	0	AAEL020733
LOC110675847	0.0759577	0.0247953	0.0902412	0.0708946	0.0372584	0.0887729	0.13663	0.178189	0.177382	0.192218	0.205635	0.0783964	AAEL026316
LOC110675848	0.199891	0.0796774	0.0161364	0.0164801	0.131648	0.113498	0.0970468	0.0867375	0.192073	0.241578	0.220876	0.102877	AAEL026049
LOC110675849	0.199891	0.0796774	0.0161364	0.0164801	0.131648	0.113498	0.0970468	0.0867375	0.192073	0.241578	0.220876	0.102877	AAEL027528
LOC110675850	0	0	0	0.0473745	0.0995899	0.0423724	0	0	0	0.104429	0	0	AAEL025739
LOC110675851	0.323464	0.678163	0.424067	0.621943	0.603799	0.994215	0.121073	0	0.362735	0.582037	0.659388	0.100844	AAEL020223
LOC110675852	0.110688	0.0788538	0.0804186	0.0186164	0.115103	0.2527	0.0199322	0	0.0386404	0	0.0547648	0	AAEL024865
LOC110675853	0	0	0	0	0.275169	1.28783	0	0.562392	0	0	0	0.233464	AAEL022294
LOC110675854	0.0662186	0	0.0364974	0	0.0593623	0	0	0	0	0.0410827	0	0.0503652	AAEL026863
LOC110675855	2.93462	1.4933	0.710703	5.26233	4.38681	4.5444	3.10856	2.53381	3.6865	0.99999	2.35943	4.36923	AAEL021354
LOC110675856	0	0	0	0	0.0830224	0	0.158888	0	0	0	0	0	AAEL025950
LOC110675857	0	0	0	0	0.0810917	0	0.155193	0	0	0	0	0	AAEL024651
LOC110675859	0	0	0	0	0	0	0	0.0214245	0	0	0	0	AAEL023791
LOC110675860	0.0612116	0	0	0	0	0	0	0	0	0	0	0	AAEL022965
LOC110675862	0.140638	0.0739503	0.163486	0.0985575	0.251061	0.099559	0.0757285	0.0921623	0.107863	0.0753995	0.200633	0.105471	AAEL025846
LOC110675863	0.147476	0.0495293	0	0.0481487	0.102751	0.0874347	0	0	0	0	0.0977755	0.0429384	AAEL027787
LOC110675864	0.0623382	0.0181264	0.0931699	0.371806	0.288935	0.438933	1.02823	0.569707	0.560534	1.02933	0.48027	0.628572	AAEL020278
LOC110675865	0.535924	0.315615	0.945559	0.682916	0.954105	1.20139	3.07763	1.96216	2.27983	4.31196	2.3334	1.5446	AAEL027649
LOC110675866	0.228854	0.154884	0.258274	1.05623	0.475968	0.742197	3.11144	2.31037	1.81572	2.57907	1.32139	1.48104	AAEL023302
LOC110675867	0.0518265	0.262124	0.0912819	0.0512743	0.135552	0.219574	0.0831791	0.0333785	0.144539	0.0719251	0.108785	0.131635	AAEL023042
LOC110675868	0	0	0	0.0511509	0.0716858	0.0610002	0	0	0.0240651	0	0	0	AAEL027535
LOC110675869	0.0172222	0	0.012639	0.0258163	0.0179093	0.0498754	0.018243	0.0321664	0.0414062	0.0187795	0.038732	0.0165763	AAEL025919
LOC110675870	0.748982	0.674495	0.974496	0.117088	0.260206	0.1526	0.582046	0.240753	0.645659	0.127207	0.249279	0.428113	AAEL024030
LOC110675871	0.0564507	0.114901	0.164054	0	0.176108	0.0499524	0.0597965	0.299943	0.179151	0.184665	0.0558601	0	AAEL026604
LOC110675872	0.0180118	0.0316049	0.0499382	0.158535	0.353939	0.289638	0.263163	0.219787	0.469122	0.146964	0.363842	0.356189	AAEL023133
LOC110675873	0.241701	0.098393	0.140484	0.557642	0.921929	0.827279	0.478258	0.598972	0.247505	0.456479	0.26309	0.291725	AAEL025278
LOC110675874	0.0606273	0.0345526	0.244319	0	0.0353057	0.197425	0.100184	0.195857	0.0359157	0.0661091	0.059993	0.0235358	AAEL021673
LOC110675875	0.060125	0	0.0320342	0.196298	0.134426	0.127689	0.0541353	0.0638931	0	0	0.116017	0.132618	AAEL027997
LOC110675876	2.24283	3.31446	2.31358	0	0	0	2.52985	3.07556	0.918723	0.4735	1.93362	0.9578	AAEL020740
LOC110675877	0.081289	0.0413644	0.0393729	0.0804229	0.126798	0.0719314	0	0	0.0429962	0.0443196	0	0	AAEL027607
LOC110675878	0.0652368	0.185094	0.191503	0.195581	0.3762	0.292134	0	0.96215	0.73194	0.286698	0.162364	0.174416	AAEL020220
LOC110675879	205.992	625.214	134.162	247.211	747.386	262.003	554.383	17.506	54.5935	97.7638	62.3197	342.008	AAEL026679
LOC110675880	0.40984	0.204848	0.136255	0.0599813	0.0781769	0.240344	0.577986	0.180395	0.53104	0.243282	0.119986	0.16689	AAEL028114
LOC110675881	0.448371	0.245935	0.163584	0.0720119	0.0938571	0.237023	0.129531	0.114477	0.483554	0.292077	0	0.200364	AAEL024727
LOC110675882	0.117244	0.142048	0.0919423	0	0	0	0	0	0	0.152196	0	0.029555	AAEL027442
LOC110675883	0.172175	0.0947935	0.155851	0.0586417	0.117405	0.05245	0.0508271	0.203961	0.143321	0	0.0335161	0.0896501	AAEL025236
LOC110675884	0.759258	1.16399	0.39592	1.22584	0.952496	0.847681	0.470577	0.758774	1.21675	0.586583	0.796073	0.674157	AAEL021686
LOC110675885	0	0	0	0	0.325791	0.0462046	0	0	0	0	0	0	AAEL026591
LOC110675886	0	0	0	0	0	0	0	0	0	0	0	0	AAEL023163
LOC110675887	0	0	0	0	0	0	0	0	0	0	0	0	AAEL020798
LOC110675888	0	0	0	0	0.0908555	0	0	0	0	0.0952699	0	0.0385426	AAEL023645
LOC110675889	0.0755219	0.230579	0	0.0747172	0.0785347	0.145807	0	0	0.0871545	0.269511	0.237783	0.0666318	AAEL020207
LOC110675890	0.342587	0.488117	0.597364	0.610086	0	0.42441	0.653206	0.218434	1.01475	0.149425	0.271202	0.181356	AAEL025004				GO:0000154,GO:0000179,GO:0008649	rRNA modification,rRNA (adenine-N6,N6-)-dimethyltransferase activity,rRNA methyltransferase activity
LOC110675891	1.63131	0.886381	0.756657	0.7249	0.208455	0.630011	1.02508	1.2267	1.17728	1.1909	1.44324	1.64054	AAEL026678
LOC110675892	0	0	0.308762	0	0.124605	0	0.337625	0	0.126758	0	0	0	AAEL024188
LOC110675893	0.417123	0	0	0.165072	0.0867528	0.147642	0.0883693	0	0	0	0	0.0736043	AAEL021296
LOC110675894	0	0.0212853	0	0	0.202993	0	0	0.185213	0.0184375	0.222358	0.191438	0.219896	AAEL022829
LOC110675895	0	0	0	0	0.196403	0	0	0	0	0	0.250436	0.276615	AAEL020138
LOC110675896	0.252346	0	0	0	0.0874709	0.0744323	0.0891008	0	0	0	0	0.0742136	AAEL026122
LOC110675897	6.96721	6.64279	9.27132	8.45297	10.9821	10.1563	9.0504	10.5602	11.1719	7.59718	8.20061	7.34412	AAEL028180				GO:0005634,GO:0008270	nucleus,zinc ion binding
LOC110675899	0	0	0	0	0.0615763	0.0691648	0	0.062925	0	0	0	0.140013	AAEL027084
LOC110675900	0	0	0	0	0	0	0	0	0	0	0	0	AAEL021856
LOC110675901	0.110679	0	0.0865481	0.150397	0.115094	0.112098	0.040963	0.170046	0.231345	0.0567081	0.0923671	0.117651	AAEL024688
LOC110675902	0.172822	0	0.135143	0.234841	0.179717	0.175038	0.0639627	0.265523	0.361239	0.0885483	0.144229	0.183709	AAEL020357
LOC110675903	1.0526	2.35674	2.31126	1.66622	1.97027	1.55239	1.85832	1.34228	0.742338	2.98423	1.31935	0.61913	AAEL024972
LOC110675904	0	0	0	0	0	0	0	0.0550073	0	0	0	0	AAEL023744
LOC110675905	0	0.194984	0.314851	0	0	0.10596	0	0.258132	0.180961	0	0.0203128	0.0633889	AAEL026427
LOC110675906	0.119022	0.0931	0.162942	0.435008	0.0971749	0.199326	0.361558	0.192335	0.280953	0.346448	0.241394	0.313298	AAEL025661
LOC110675907	0	0	0	0	0	0	0	0	0.122987	0	0	0	AAEL022023
LOC110675908	1.13104	0.816892	1.15132	0.270723	0.40312	1.20747	1.38455	0.193859	0.437103	0.497302	0.509962	0.428131	AAEL024546
LOC110675909	0	0	0	0	0	0	0.213136	0	0	0.438808	0	0	AAEL020991
LOC110675910	0.0188752	0.0880435	0.0792334	0.0420166	0.0196282	0.2394	0.184943	0.0401162	0.153083	0.137212	0.0373554	0.341392	AAEL020465
LOC110675911	0	0.0178076	0	0.0136017	0	0	0	0.0225787	0	0.068142	0.0173146	0	AAEL024978
LOC110675912	23.1849	19.3821	26.8139	17.3204	15.3762	19.3645	6.89157	8.17073	7.38294	9.28699	7.60842	8.66235	AAEL022575
LOC110675913	0	0	0	0	0	0	0	0.232965	0.115955	0	0.216932	0	AAEL027197
LOC110675914	4.97634	4.07654	5.07801	5.16594	4.72857	5.60608	5.72589	6.64555	5.53451	5.93884	6.02642	5.65272	AAEL025265
LOC110675915	0.753296	0.724048	0.567567	0.74527	0.696309	0.66658	1.04885	1.27458	1.01824	0.912677	1.07671	1.07078	AAEL021621				GO:0046872,GO:0046983	metal ion binding,protein dimerization activity
LOC110675916	1.06303	0.570457	1.36167	0.439736	0.813992	1.3356	0.956018	1.05749	0.891401	1.2231	1.52288	0.462956	AAEL026012
LOC110675917	1.0625	0.587225	1.37399	0.452662	0.816111	1.34675	0.883149	1.05818	0.917603	1.2244	1.55193	0.448531	AAEL020705
LOC110675918	2.08052	1.8527	1.65553	2.64646	2.5885	2.86016	2.16448	2.8426	3.77298	2.51171	1.65436	1.40949	AAEL025164
LOC110675919	39.195	32.7393	27.1513	35.4118	37.5287	32.589	44.5732	50.0603	47.0174	40.5618	47.7128	45.2818	AAEL023494				GO:0003735,GO:0005763,GO:0005840,GO:0006412	structural constituent of ribosome,mitochondrial small ribosomal subunit,ribosome,translation
LOC110675920	0	0	0.173821	0.515323	0.373186	0.422806	0	0.0185232	0.0412174	0	0.0142046	0.012665	AAEL027224
LOC110675921	0.134763	0.065832	0.0326367	0	0.0546543	0	0.14275	0	0.0285121	0.036737	0.156023	0.0142679	AAEL023803
LOC110675922	0	0.142814	0.409452	0.195705	0.145927	0.273782	0.268637	0.238956	0.268279	0.215698	0.125476	0.037292	AAEL025685
LOC110675923	0.23855	0.0945155	0.234615	0.136921	0.172321	0.486633	0.119593	0.210927	0.0770542	0.212464	0.309934	0.244208	AAEL021908
LOC110675924	0.23855	0.0945155	0.234615	0.136921	0.172321	0.486633	0.119593	0.210927	0.0770542	0.212464	0.309934	0.244208	AAEL026525
LOC110675925	0	0.0689407	0.164054	0.87795	0	0.173834	0.208092	0.179966	0.11824	0.443196	0.278183	0.418367	AAEL022875
LOC110675926	3.98352	4.56888	4.53266	4.69175	3.22189	4.30827	6.22896	6.04738	3.94645	4.82634	4.06698	4.18404	AAEL023923
LOC110675927	0.766215	0.762972	0.758249	0.069471	0.309263	0.352712	0.781001	0.886659	0.502497	0.747668	0.39034	0.42274	AAEL026238
LOC110675928	0	0	0	0	0	0	0	0	0	0	0	0	AAEL024557
LOC110675929	0	0.09802	0	0.0952878	0	0.0852268	0.102023	0	0.203774	0	0.0953064	0	AAEL021011
LOC110675930	0	0.103826	0	0.0504662	0	0	0.054033	0.0542065	0	0.055622	0	0	AAEL024818				GO:0005515	protein binding
LOC110675931	0	0.0924965	0	0	0	0	0.0481367	0	0	0.0991046	0	0	AAEL022002
LOC110675933	5.69783	5.18129	12.1124	0.208782	2.5511	1.77401	6.28702	7.31187	7.85027	6.61572	6.57792	2.51355	AAEL023669
LOC110675934	0.328187	0.456101	0.143128	0.22132	0.235771	0.187753	0.334429	0.232302	0.215461	0.171411	0.334662	0.349065	AAEL027015
LOC110675935	0.477842	0.743678	0.32416	0.416076	0.369046	0.408617	0.536874	0.432437	0.461519	0.359935	0.504988	0.72885	AAEL022501
LOC110675936	0.091213	0.0928286	0	0.180482	0	0.161426	0	0.193859	0.0964907	0	0.180517	0.482855	AAEL022279
LOC110675937	0	0	0.160367	0.0564767	0	0.0505136	0.151171	0.0606625	0.060388	0	0	0	AAEL027537
LOC110675938	1.42805	0.822497	2.09026	3.27785	2.14594	1.42856	1.35062	1.94905	2.376	2.86623	1.59169	1.91934	AAEL023172
LOC110675939	0	0	0	0	0	0.0967432	0.115808	0	0	0	0	0	AAEL026595
LOC110675940	0.23252	1.30151	0.337868	0	0.241796	0	0.615754	0.617731	0.491948	0.380317	0.460175	0.205149	AAEL023225
LOC110675941	2.81431	3.0149	2.72626	2.34469	5.08301	2.75248	4.86392	5.50915	4.85745	5.49149	3.22458	4.18193	AAEL018004
LOC110675942	0.972357	1.31944	1.72688	0.801664	2.35934	1.29063	1.71665	2.06659	1.8858	1.23699	0.962184	0.857895	AAEL020509
LOC110675943	0	0.110482	0	0.0708856	0	0.128723	0.0758956	0.0576813	0	0.0591875	0.107423	0.0632148	AAEL027770
LOC110675944	0.0976093	0	0.0472778	0	0.0507516	0	0	0	0	0	0	0	AAEL021372
LOC110675945	0	0	0	0	0	0	0	0	0	0	0	0	AAEL025094				GO:0005549	odorant binding
LOC110675946	0	0	0	0	0	0	0	0.269948	0	0.276997	0.251371	0.224125	AAEL023262				GO:0005549	odorant binding
LOC110675947	0.213586	0	0	0	0	0	0.0267746	0.053721	0.0534779	0	0	0.022301	AAEL026832
LOC110675948	0	0.0294116	0	0	0	0.0511458	0.367351	0.122843	0	0.126051	0.114389	0	AAEL020529
LOC110675949	0	0	0	0	0	0	0.0655637	0	0	0.0674917	0	0	AAEL027799
LOC110675950	0	0	0	0	0	0	0.0337234	0	0	0.0723231	0	0	AAEL020510
LOC110675951	0	0.0567258	0.0539947	0.110289	0	0.0493221	0	0	0	0.0607783	0.0551554	0	AAEL028184
LOC110675952	0.0610778	0.17141	0.0251011	0.0933872	0.0384936	0.0327556	0.149001	0.0609719	0.107686	0.121092	0.104394	0.0408243	AAEL027004
LOC110675953	0.88011	0.521828	0.0802602	1.25893	0.484433	0.634933	0.72363	0.890414	0.616831	0.939234	0.487272	0.464801	AAEL022635
LOC110675954	0.0988437	0.0502972	0.0957513	0.0488952	0.0513934	0.0874652	0	0.157557	0	0.0538905	0.244524	0.0436041	AAEL027282
LOC110675955	42.9784	37.0774	39.3826	37.8742	41.1412	37.4013	41.2295	44.4122	45.9169	47.1749	41.9655	44.1345	AAEL023530				GO:0005515	protein binding
LOC110675956	7.9826	6.06142	6.83524	3.60706	5.22098	5.21841	6.97592	3.81404	4.97487	6.46888	2.8057	1.18353	AAEL024728
LOC110675957	10.6208	11.2123	13.4224	13.2784	14.4055	18.1808	11.3716	14.7398	12.549	12.8167	12.1655	10.7614	AAEL020110				GO:0000122	negative regulation of transcription by RNA polymerase II
LOC110675958	0.748242	0.152299	0	0.296108	0.155618	0.132422	0	0.159027	0.316614	0	0	0	AAEL026059
LOC110675959	0.482834	0	0	0.23528	0.247301	1.06494	0	0	0.251574	0	0.235326	0.425997	AAEL021089
LOC110675960	0.0363192	0.0235216	0.0175915	0	0.0240343	0.0482075	0.0148641	0.0289465	0.0218299	0.0099008	0	0.00801097	AAEL028075
LOC110675961	0.91377	0.371982	0.354073	2.11002	1.82443	2.34489	1.93586	0.582622	0.579985	1.01831	0.90421	0.886826	AAEL023465
LOC110675962	0	0.0258528	0.0418337	0	0.132081	0	0.0457443	0	0	0.138499	0	0.0739613	AAEL021991
LOC110675963	0.113914	0.0579659	0.11035	0.0563501	0.0592292	0.100801	0	0.18158	0	0.062107	0.281806	0.0502523	AAEL025510
LOC110675964	0.0288668	0	0.22371	0.114237	0	0.102175	0	0	0	0.251816	0.142824	0.135494	AAEL021025
LOC110675965	0	0	0	0	0	0	0	0.0922112	0.0917939	0.189238	0	0.153117	AAEL024581
LOC110675966	3.89702	2.05647	1.67782	2.99872	3.00184	3.83157	2.44622	3.22097	2.1376	1.73123	2.28519	2.0375	AAEL026341
LOC110675967	0.0268469	0	0.0394044	0	0.0422998	0	0	0	0	0	0	0	AAEL023938
LOC110675968	0.637918	1.0202	0.35312	0.360641	0.852901	0.645125	0.77226	0.0968424	0.289212	0.695599	0.541067	0.428551	AAEL025272
LOC110675969	0.165329	0.403818	0.128125	0.163568	0.240695	0.234075	0.280205	0.395303	0.489707	0.252389	0.163599	0.408429	AAEL023058
LOC110675970	0.309624	0.252434	0.386107	0.0558492	0.0800492	0.155912	0	0.0454458	0.18277	0	0.0203128	0.273176	AAEL025269
LOC110675971	0.0643109	0.044506	0.0622989	0.132341	0.0775768	0.066013	0.0844721	0.123014	0.136064	0.0701259	0.0636381	0	AAEL021642
LOC110675972	0	0	0.065797	0	0	0.139439	0.0719477	0	0.071852	0.216265	0.0672114	0	AAEL024401
LOC110675973	0	0	0	0	0	0	0.129057	0	0	0.265705	0.120561	0.107494	AAEL020699
LOC110675974	0.138038	0.205521	0.371443	0.279457	0.276457	0.409421	0.0568631	0	0.197404	0.655038	0.237774	0.225535	AAEL024998
LOC110675975	0.146203	0.260388	0.247851	0.216968	0.190045	0.0646865	0.0774344	0.233049	0.0773314	0.27899	0.108505	0.193489	AAEL023658
LOC110675976	0.580636	1.03411	1.54679	1.00529	1.05665	0.642245	1.38386	2.15959	1.38202	1.42456	0.861842	1.53686	AAEL028159
LOC110675977	0.349265	0.380841	0.362505	0.641724	0.739369	0.375287	0.17177	0.450687	0.409061	0.231228	0.308582	0.275135	AAEL023581				GO:0006486,GO:0016020	protein glycosylation,membrane
LOC110675978	14.9918	31.7477	4.98763	11.6859	8.97601	11.792	11.7098	2.092	2.8835	10.568	6.59332	4.54263	AAEL028189
LOC110675979	0.154709	0.130236	0.181323	0.291004	0.0278066	0.104787	0.176018	0.119751	0.385916	0.0791421	0	0.109535	AAEL022534
LOC110675980	0	0.0595686	0	0.0640851	0.0811558	0	0.082668	0	0	0.085099	0	0	AAEL025191
LOC110675981	0.954993	1.16629	0.185023	0.755854	1.39033	1.52111	0.202319	0	1.01025	0.624806	0	0	AAEL020437
LOC110675982	0.164088	0.166994	0.0862326	0	0	0.120878	0.13036	0.130778	0	0.156559	0.202964	0.542895	AAEL027814
LOC110675983	35.9541	32.2596	33.3691	26.7111	25.2176	30.6775	32.215	33.6846	32.0314	29.8268	31.3665	37.7453	AAEL024191				GO:0047617	acyl-CoA hydrolase activity
LOC110675984	3.29748	2.61014	2.72109	2.89986	8.63607	1.72912	5.9509	6.22958	6.45977	4.12833	3.62554	7.11166	AAEL026909
LOC110675985	0.0909083	0.216484	0.187841	0.225071	0.20956	0.159698	0.0868091	0.142767	0.0947471	0.0991282	0.187448	0.0790217	AAEL022265
LOC110675986	1.83465	0.502693	1.36712	0.837738	0.293514	0.561964	0.0986643	0.299943	1.64222	0.717115	1.6758	0.747084	AAEL020306
LOC110675987	0	0	0	0	0	0	0	0	0	0	0	0	AAEL025886
LOC110675988	0.200417	0	0	0	0	0	0	0	0.212013	0	0.09916	0	AAEL023860
LOC110675989	134.841	133.736	136.475	118.732	137.793	126.609	155.342	146.21	154.118	152.372	157.073	170.941	AAEL025110
LOC110675990	458.985	582.702	423.712	21.358	53.5537	50.7877	276.431	203.981	253.685	362.649	236.786	201.964	AAEL020833
LOC110675991	27.6187	26.1989	17.6756	6.47986	6.79537	5.71142	18.6263	14.085	15.5926	10.4184	12.8747	11.8201	AAEL025683
LOC110675992	0.269526	0.2743	0	0.266654	0.700696	0.238499	0.856502	1.00246	1.4256	0.146948	0.933471	0.594497	AAEL027389
LOC110675993	5.54516	6.406	7.45259	9.6377	8.05214	10.3883	7.038	8.65321	7.55711	8.44338	6.22865	7.00804	AAEL024527
LOC110675994	5.52032	6.76076	8.15737	7.68313	7.68649	8.69336	5.15373	5.66742	5.0479	3.67289	4.16636	3.96243	AAEL026201
LOC110675995	0.268813	1.0943	2.08322	0.265949	0.83861	2.14082	0.569491	0	0.568733	0.586238	0.266001	0.711509	AAEL022815
LOC110675996	0.159934	0	0.361504	0.245783	0.803852	0.67648	0.358026	0.207347	0.225584	0.106962	0.949563	0.524919	AAEL025486
LOC110675997	0	0	0	0	0	0	0	0	0	0.319766	0	0	AAEL021949
LOC110675998	0	0.130241	0.024794	0	0	0.0373699	0	0	0.0338446	0	0	0	AAEL024644
LOC110675999	0.0444494	0.00995207	0.0172235	0	0	0.0196663	0	0.0103917	0.117553	0	0.00967656	0	AAEL020937
LOC110676000	0.517106	0.263133	0.62616	0	0.537735	1.14395	1.09551	0.137378	0.410269	0.563862	0.255848	0.417455	AAEL027981
LOC110676001	0.0658371	0.054087	0.0253573	0.0784767	0.0272205	0	0.0562956	0.11211	0.167823	0.0717901	0	0	AAEL020729
LOC110676002	0.0659813	0.167875	0.122721	0.163196	0.085767	0.175158	0.0873651	0.19282	0.197531	0.107921	0.195873	0.353943	AAEL024318
LOC110676003	0.0450858	0.156144	0.0977804	0.161112	0.192436	0.153628	0.0769831	0	0.0533894	0.112266	0.111202	0.0344351	AAEL021500
LOC110676004	0.0887435	0.180631	0.0429835	0.219495	0.207638	0.588958	0.117504	0.235763	0.0938783	0.12096	0.109769	0	AAEL026182
LOC110676005	0.251963	0.140123	0.0666886	0.272435	0.143177	0.101123	0	0.0482834	0	0.0495442	0.0449606	0.0400874	AAEL022141
LOC110676006	0.522169	0.199481	0.126078	0.206332	0.163063	0.485648	0.470067	0.166635	0.11114	0.598451	0.361539	0.211674	AAEL026621
LOC110676007	0.525988	0.395948	0.37478	0.59027	0.20907	0.608724	0.658465	0.616695	0.597809	0.874541	0.482846	0.3097	AAEL024042
LOC110676008	0.318768	0.208956	0.467673	0.559373	0.716188	0.491036	0.174382	0.250947	0.17415	0.391965	0.39658	0.281244	AAEL027488
LOC110676009	0.0875205	0.445353	0.0847823	0.952467	0.45506	0.387228	0.741662	0.837049	0.648091	0.095434	0.0866048	0.463308	AAEL020751
LOC110676010	1.07352	1.80506	0.859078	10.8979	0.291222	1.52817	0.791061	0.644801	1.03689	49.1735	12.0699	1.31778	AAEL023992
LOC110676011	1.61288	1.35715	0.94995	1.56378	0.894294	0.98192	2.18889	1.37665	1.91094	1.9578	1.81944	1.62224	AAEL025862
LOC110676012	0.00338328	0.0149206	0.00327744	0.0136679	0.0293188	0.0184619	0.0113487	0.00359532	0.0471241	0.0166014	0.0139495	0.0231339	AAEL020251
LOC110676013	0.954096	1.05191	0.924247	1.49456	1.48824	2.11066	0.842205	1.43634	1.76628	1.21376	1.41617	0.420892	AAEL026776
LOC110676014	0.904636	1.18772	1.05122	0.978934	1.14898	1.50585	2.03773	1.29261	2.42637	1.34465	1.31786	0.938279	AAEL025235
LOC110676015	0.115599	0.117646	0.0559911	0.0571835	0.0300526	0.127864	0	0.0921325	0.122287	0.0630256	0	0.280475	AAEL028063
LOC110676016	0	0	0	0	0.0737883	0	0	0.0150809	0.0150127	0	0.023171	0	AAEL022545
LOC110676017	0.306058	0.186887	0.237186	0.121119	0.190961	0.324991	0	0.195143	0.38852	0	0.908568	0.432049	AAEL024044				GO:0042302	structural constituent of cuticle
LOC110676018	49.2556	55.0357	47.7146	32.7144	31.8786	55.1677	48.1615	44.6558	38.9881	52.9581	48.7403	37.9873	AAEL026606
LOC110676019	4.57361	6.00053	4.00348	5.56069	5.44369	6.92398	5.13654	4.15755	4.54678	5.82836	6.05252	3.98661	AAEL020167
LOC110676020	3.55548	3.49454	4.0576	3.18029	3.39343	4.50918	3.55985	3.73949	3.82561	3.29277	3.19296	2.85226	AAEL023574				GO:0005634,GO:0008270	nucleus,zinc ion binding
LOC110676021	0	0.220964	0.210325	0	0	0	0	0	0	0	0	0	AAEL020232
LOC110676022	0.369054	0.321229	0.441005	0.29546	0.270159	0.24815	0.483516	0.473458	0.374997	0.489792	0.42766	0.309544	AAEL025848
LOC110676023	0.582283	0.349104	0.336485	0.272354	0.106414	0.266554	0.471756	0.471739	0.3705	0.616073	0.225342	0.375132	AAEL027685
LOC110676024	0.341038	0.657622	0.556409	0.550501	0.877274	0.682973	0.589409	0.305188	0.227855	0.50888	0.390754	0.459257	AAEL024713
LOC110676025	0.501165	0.54192	0.402953	0.123956	0.42735	0	0.0132717	0.532574	0.0265082	0.624354	0.247961	0.221085	AAEL028149
LOC110676026	0.850422	1.97619	1.07096	1.1148	1.72448	1.36082	1.59146	1.83756	0.937113	1.46052	1.41657	0.994167	AAEL023651				GO:0005262,GO:0098703	calcium channel activity,calcium ion import across plasma membrane
LOC110676027	0.108264	0	0	0.0322621	0.0447618	0.0577113	0.172711	0	0	0	0.129073	0	AAEL027021
LOC110676028	0.0394027	0	0.03817	0	0	0.0348669	0	0.0418721	0	0.0755151	0	0	AAEL022516
LOC110676029	0	2.87253	1.27415	0	0	0.164843	1.19593	0.599885	0.298585	0.307775	0.558601	0.249028	AAEL024743
LOC110676030	48.4539	46.0608	56.7383	74.3648	71.7045	81.0406	64.7683	69.7858	74.4455	70.5436	74.3793	55.4343	AAEL024500				GO:0000139,GO:0005198,GO:0005515,GO:0005737,GO:0005794,GO:0006890,GO:0015031,GO:0016020,GO:0016192,GO:0031410	Golgi membrane,structural molecule activity,protein binding,cytoplasm,Golgi apparatus,retrograde vesicle-mediated transport, Golgi to endoplasmic reticulum,protein transport,membrane,vesicle-mediated transport,cytoplasmic vesicle
LOC110676031	1.59333	2.43233	0.982218	3.08106	1.80753	2.81983	0.997319	2.07801	1.07261	0.947674	0.788332	1.46967	AAEL009873				GO:0003723,GO:0005737,GO:0030430	RNA binding,cytoplasm,host cell cytoplasm
LOC110676032	0.0429102	0.0419234	0.0415677	0.118868	0.0178488	0.0516399	0.145451	0	0.134363	0.0374321	0.12059	0.021201	AAEL025629
LOC110676033	0.0995516	0.129264	0.0565321	0.0407548	0.239174	0.285538	0.276357	0.233469	0.363144	0.348118	0.125685	0.102976	AAEL026270
LOC110676034	0.44132	0.314031	0.260679	0.518262	0.294757	0.53339	0.281246	0.362219	0.345397	0.281692	0.347942	0.291236	AAEL023736
LOC110676035	0.11747	0	0.0568973	0	0	0	0	0	0.0621333	0	0	0	AAEL027696
LOC110676036	0	0.133606	0	0	0	0	0	0	0	0	0	0	AAEL025073
LOC110676037	0	0	0	0	0	0.0463475	0	0	0	0	0	0	AAEL026046
LOC110676038	0.0393842	0.0400818	0	0.0779292	0.327643	0.209103	0	0	0	0	0	0	AAEL021334
LOC110676039	0.0468687	0.0267113	0.181609	0.0779004	0.0643347	0.0879235	0.0655335	0.11555	0	0	0.0315373	0	AAEL025402
LOC110676040	1.91719	4.39966	3.49593	2.04553	2.97097	1.62997	3.22543	1.9175	1.98836	1.8446	2.26912	3.11769	AAEL023194
LOC110676041	0.181449	0.327468	0.175772	0.438018	1.21515	0.44529	0	0	0	0.131903	0	0	AAEL023421
LOC110676042	0.196161	0.349362	0.23753	0.145553	0.203986	0	0.986989	0.364795	0.311266	0.641693	0.242636	0.302872	AAEL027928				GO:0046872	metal ion binding
LOC110676043	2.31341	3.42492	1.3471	1.53006	1.33975	2.11836	1.9523	1.70458	2.97053	2.79715	2.20068	1.80992	AAEL025002
LOC110676044	0.0504563	0.0316	0.0488778	0	0.111396	0.089296	0.0164452	0.0206225	0.0574816	0.0507864	0.0691317	0.0226009	AAEL021549				GO:0003676,GO:0008270	nucleic acid binding,zinc ion binding
LOC110676045	3339.86	3111.37	2999.81	2756.21	2709.73	2850.04	2931.72	2896.74	3009.9	2997.24	2939.22	3203.51	AAEL022286	40S ribosomal protein S27 [Source:UniProtKB/TrEMBL;Acc:Q1HR58]			GO:0003735,GO:0005840,GO:0006412,GO:0046872	structural constituent of ribosome,ribosome,translation,metal ion binding
LOC110676047	0.716834	8.75438	1.73602	3.19138	5.21802	3.17158	7.40338	0	0.758311	2.14954	0.886668	3.6366	AAEL023215
LOC110676048	65.7717	76.0319	14.7412	17.2178	53.1249	6.46984	109.933	65.9092	69.6765	79.6403	98.6003	154.378	AAEL027838
LOC110676049	79.9246	136.518	23.9129	30.2589	105.233	15.5784	170.284	88.9314	98.112	101.618	148.518	222.55	AAEL027885
LOC110676050	65.8597	131.518	29.2218	33.5955	89.5298	16.8301	113.076	65.1881	70.6498	83.8094	123.351	137.463	AAEL027299
LOC110676051	0	0	0	0	0	0	0	0	0.039501	0	0	0	AAEL023832
LOC110676052	0.404136	0.293781	0.111855	0.171356	0.360221	0.102175	0.183467	0.184056	0.122148	0.251816	0.114259	0.254688	AAEL024380				GO:0005515	protein binding
LOC110676053	1.27014	0.891475	1.06494	1.00962	0.783378	1.64326	0.997468	1.41956	1.55213	2.15867	2.0413	1.93211	AAEL024483
LOC110676054	0	0	0	0	0.0776602	0	0.148626	0	0	0	0	0	AAEL020870
LOC110676055	1.35768	0.472695	1.49933	1.59064	0.705919	1.24312	1.50173	1.60678	0.768006	0.986438	0.519004	1.06168	AAEL025797
LOC110676056	0	0	0	0	0	0.0329137	0	0	0	0	0	0.149168	AAEL022064				GO:0003924,GO:0005525,GO:0005874,GO:0007017	GTPase activity,GTP binding,microtubule,microtubule-based process
LOC110676057	0	0	0	0	0	0	0	0	0	0	0	0	AAEL027327				GO:0003676,GO:0003677	nucleic acid binding,DNA binding
LOC110676058	2.53538	1.77561	3.05425	1.76814	1.56289	1.41955	2.40532	3.20466	2.85144	1.03317	1.43225	1.13864	AAEL023708
LOC110676059	3.32914	2.20964	2.80434	4.15289	3.46196	4.86715	3.67979	4.71602	4.05769	3.788	2.86462	2.42643	AAEL024649
LOC110676060	0.247832	0.252222	0.240079	0.252547	0	0.219303	0.393782	0.263364	0.131086	0.0540483	0	0.181487	AAEL021840
LOC110676061	0.425152	0.108171	0.411851	0.420622	0.221056	0.141079	0.45035	0.338847	0.562189	0.115898	0.315528	0.468881	AAEL020661
LOC110676062	0	0	0	0	0	0.0849851	0	0	0.609588	0	0	0	AAEL024384
LOC110676063	0.82948	1.12556	1.07137	1.23096	0.862571	1.59032	1.4644	0.734553	0.877474	2.86419	1.368	0.975783	AAEL021589				GO:0016491	oxidoreductase activity
LOC110676064	0.108813	0.387991	0.145601	0.16729	0.0439592	0.105985	0.0630213	0.128111	0.110141	0.0426806	0.120844	0.0821907	AAEL025270
LOC110676065	0	0	0	0	0	0	0	0	0.0664342	0	0	0	AAEL026593
LOC110676066	4.63241	3.88356	3.68154	4.47111	3.76518	6.27436	2.59684	2.36941	3.80207	2.95625	2.81008	2.87546	AAEL021964
LOC110676067	1.95898	2.30333	1.76305	1.71883	1.00977	3.42206	2.93257	2.66056	2.55514	3.30758	1.74705	1.64055	AAEL027529
LOC110676068	0.297616	0.0685006	0.0785573	0.120346	0.154323	0.21743	0.0283473	0.0430883	0	0.117608	0.040123	0.130933	AAEL022868
LOC110676069	0	0	0	0	0	0.184793	0	0	0	0	0	0	AAEL025254
LOC110676070	0.31201	0.502766	0.335496	0.102895	0.143843	0.460155	0.523296	0.202254	0.440084	0.113407	0.514576	0.561575	AAEL023006
LOC110676071	0.542297	0.659269	1.12059	1.22685	0.65824	1.43633	0.268594	0.727729	0.763594	0.534822	1.06592	0.342924	AAEL025821
LOC110676072	0.248438	0.252839	0.0481332	0.55303	0.258349	0.257212	0.300006	0.353771	0	0.308828	0.245839	0.414275	AAEL021212
LOC110676073	0.378008	0.22941	0.550952	0.20243	0.0757325	0.156506	0.0404086	1.0282	0.231123	0.378153	0.298556	0.654782	AAEL027009
LOC110676074	3.52414	2.10652	2.21342	2.75523	2.01546	2.08611	2.9642	2.30813	2.74983	2.33909	1.48428	2.66816	AAEL022519
LOC110676075	10.0918	141.141	45.0652	79.2555	143.768	77.8351	96.1111	3.31974	8.3626	164.3	70.0361	36.5758	AAEL025406
LOC110676076	2.35962	23.5204	14.0662	58.6538	20.5119	35.7569	16.4028	0.626876	1.09207	159.525	63.7	4.0336	AAEL021283
LOC110676077	1.72277	2.67929	1.02907	1.29431	1.22715	1.79828	1.62674	1.47858	2.44541	2.78005	1.95612	1.68603	AAEL020681
LOC110676078	0.4225	0	0.204641	0.417998	0.439355	0	0	0.224489	0	0.230351	0	0	AAEL025054
LOC110676079	0.41474	0.422086	0.602647	1.12838	0.323464	0.825743	0.988473	0.881464	0.877474	1.46978	0.820802	1.18924	AAEL020284
LOC110676080	0	0	0.166552	0	0	0	0.182121	0.182706	0	0	0	0	AAEL021971
LOC110676081	0.400424	0.242059	0.298943	0.306798	0.561981	0.315699	0.513453	1.067	0.410853	0.874901	0.624144	0.447586	AAEL021355
LOC110676082	0.412213	0.288308	0.119959	0.654527	0.926111	0.738528	0.10422	0.391177	0.53835	0.253413	0.374328	0.508865	AAEL025351
LOC110676083	0	0.146475	0	0.142392	0	0.254715	0	0.30589	0	0.156939	0	0.126983	AAEL020680
LOC110676084	3.5645	3.76897	3.6772	2.93113	4.71761	3.07224	5.1978	5.1161	4.35839	4.54301	4.30594	4.73777	AAEL024291
LOC110676085	0	0	0	0	0	0.120046	0	0	0	0	0	0	AAEL021765
LOC110676086	0.0751563	0	0.0364025	0.0743555	0.0390773	0	0.0398054	0.0399332	0	0	0.111555	0.0331546	AAEL025418
LOC110676087	0	0.440047	0	0	0.373199	0.700183	0	0.229743	0.228703	0	0	0	AAEL020966
LOC110676088	0.227016	0.0688667	0.2252	0.249432	0.3019	0.16032	0.298276	0.468568	0.357917	0.496274	0.306721	0.250365	AAEL024299
LOC110676089	0.876576	0.728247	0.95313	0.293798	0.167427	0.535053	0.378992	0.980939	0.688848	0.292603	0.973618	1.10484	AAEL024057
LOC110676090	0.0740607	0	0.0947016	0.196368	0	0.0524281	0	0	0.103417	0.0807572	0.0732859	0	AAEL024587
LOC110676091	28.6008	23.9491	31.5638	31.1615	36.3929	33.8513	30.1681	32.9581	31.7876	30.9237	32.0035	27.5764	AAEL020757	Golgi apparatus membrane protein TVP23 homolog [Source:UniProtKB/TrEMBL;Acc:A0A0P6JRR5]			GO:0016020,GO:0016021	membrane,integral component of membrane
LOC110676092	32.5612	40.5521	22.5523	19.9616	20.3556	21.7498	31.2702	29.1827	25.968	34.0548	30.6848	34.4851	AAEL025498				GO:0002376,GO:0005737,GO:0007165,GO:0016787,GO:0034128,GO:0035591,GO:0045087,GO:0048678,GO:0050135,GO:0061809	immune system process,cytoplasm,signal transduction,hydrolase activity,negative regulation of MyD88-independent toll-like receptor signaling pathway,signaling adaptor activity,innate immune response,response to axon injury,NAD(P)+ nucleosidase activity,NAD+ nucleotidase, cyclic ADP-ribose generating
LOC110676093	0.0849548	0.100075	0.091369	0.0549301	0.143298	0.136736	0.148802	0.166341	0.173372	0.110872	0.118487	0.0720034	AAEL025721
LOC110676094	0.0806539	0.120862	0.0867435	0.0647153	0.136044	0.141053	0.141269	0.171417	0.164595	0.119109	0.112488	0.0683582	AAEL026337
LOC110676095	0.285425	0.225607	0.294928	0.0941279	0.395749	0.353595	0.352732	0.269948	0.293888	0.314345	0.470731	0.335768	AAEL022647
LOC110676096	0.130104	0.132409	0.252067	0.257436	0.405883	0.115127	0.137815	0.967804	0.412896	0	0	0.229578	AAEL027265
LOC110676097	0.0168454	0	0	0	0	0.0471036	0.0121338	0	0	0.039676	0.0266706	0.0101064	AAEL027315
LOC110676098	0	0	0	0	0	0.638444	0	0	0	0	0	0	AAEL020338
LOC110676099	0.682609	0.34735	0.519556	0.530621	0.304218	0.34516	0.619772	0.518135	0.567369	0.797497	0.434229	0.860365	AAEL024199				GO:0004930,GO:0007186,GO:0016021	G protein-coupled receptor activity,G protein-coupled receptor signaling pathway,integral component of membrane
LOC110676100	0.136208	0	0.131947	0.269514	0	0.120528	0.216422	0.144744	0	0	0.0673916	0	AAEL022636
LOC110676101	0.0216613	0.022045	0.0209836	0	0.0225255	0	0.133499	0	0	0.0236199	0	0.0764458	AAEL024895
LOC110676102	4.58238	3.32066	4.27207	3.15173	2.62482	3.61881	3.09685	3.64669	3.61024	3.18498	3.4952	4.63377	AAEL027330
LOC110676103	0.121462	0.147276	0.100853	0.0171668	0.0602665	0.051283	0.048891	0.0368782	0.0671816	0.0692493	0.0456725	0.0459273	AAEL025985
LOC110676104	0.292281	0.265754	0.448226	0.394319	0.495453	0.469435	0.404718	0.623145	0.818053	0.498545	0.29285	0.549703	AAEL020276
LOC110676105	0.0379713	0.321517	0.4414	0.100679	0.17058	0.178753	0.447267	0.40351	0.361515	0.0414047	0.112722	0.368517	AAEL021585
LOC110676106	0	0	0.0577654	0	0.0620099	0.105533	0.0631654	0.0633681	0.0630813	0	0.0590072	0.0526115	AAEL026111				GO:0003924,GO:0005200,GO:0005525,GO:0005874,GO:0007017	GTPase activity,structural constituent of cytoskeleton,GTP binding,microtubule,microtubule-based process
LOC110676107	0.176103	0.089611	0.341187	0.174226	0.366256	0.389576	0.18654	0.0935696	0.0931461	0.192026	0.0871302	0.155373	AAEL022825
LOC110676108	3.00855	2.18035	2.84031	2.97649	2.41247	2.0989	3.72828	1.95143	4.66872	3.08702	2.7257	2.99194	AAEL025285
LOC110676109	2.39524	2.35641	2.92616	2.25123	2.32474	3.48942	2.59358	2.68676	2.22414	2.69887	2.29117	2.62986	AAEL004165	bone morphogenetic protein receptor type II, putative [Source:VB Community Annotation]			GO:0000166,GO:0004672,GO:0004674,GO:0004675,GO:0005524,GO:0006468,GO:0007178,GO:0016020,GO:0016021,GO:0016301,GO:0016310,GO:0016740,GO:0046872	nucleotide binding,protein kinase activity,protein serine/threonine kinase activity,transmembrane receptor protein serine/threonine kinase activity,ATP binding,protein phosphorylation,transmembrane receptor protein serine/threonine kinase signaling pathway,membrane,integral component of membrane,kinase activity,phosphorylation,transferase activity,metal ion binding
LOC110676110	0.291643	0.980622	0.323449	0.319122	0.865895	0.434981	0.259806	0.113893	0.124279	0.374199	0.218228	0.128201	AAEL028007
LOC110676111	0	0	0	0	0	0	0	0	0	0	0	0	AAEL024246
LOC110676112	1.39503	0.469394	1.35138	1.57953	0.553413	1.36002	1.64157	1.74637	0.762643	0.979549	0.51538	0.929055	AAEL020673
LOC110676113	1.18314	1.09668	2.39901	2.19533	2.2291	2.48188	2.02858	2.54417	2.12527	3.05329	2.78344	0.94153	AAEL025405
LOC110676114	3.82717	3.44054	4.32534	2.08251	2.05625	2.25773	4.12157	3.11805	3.17141	4.52099	3.59777	3.03899	AAEL020322
LOC110676115	0.223137	0.137963	0.152239	0.178032	0.163425	0.16985	0.261777	0.212899	0.158634	0.25901	0.14364	0.246617	AAEL026462
LOC110676116	0.246629	0	0	0.162668	0	0	0.114949	0	0	0.358573	0.162699	0	AAEL023062
LOC110676117	0.168341	0	0.0176297	0.0180051	0	0.016104	0.0224906	0	0.0449214	0	0.0210101	0.0468321	AAEL027687
LOC110676118	0	0.0187533	0	0	0.0150559	0	0.0306728	0	0	0.0574088	0.0156293	0	AAEL023724
LOC110676119	0	0	0.126427	0.156788	0.293244	0.263968	0.330801	0.282331	0.764268	0.0254126	0.0253677	0.0246743	AAEL020879
LOC110676120	0	0	0.356639	0	0	0	0	0	0	0.401445	0	0	AAEL022533
LOC110676121	0.609363	0.155039	0.147575	0.60287	0.0792091	2.93199	0	0.080944	0	2.07644	3.05263	0	AAEL019614
LOC110676122	0.0203875	0	0.059249	0.0201703	0.0848033	0.0541217	0	0	0	0	0	0	AAEL023908
LOC110676123	0	0	0	0	0	0	0	0	0	0	0	0	AAEL020808
LOC110676124	0	0	0	0	0	0.0259868	0	0	0.0310666	0	0	0	AAEL024511
LOC110676125	0	0	0	0	0	0	0	0	0	0	0	0	AAEL022468
LOC110676126	29.216	34.9822	28.0628	31.0488	30.5241	36.7279	25.7461	26.2952	25.3636	32.7551	29.7518	30.5691	AAEL026075
LOC110676127	3.88178	21.8441	11.3916	9.37514	44.8779	10.3048	26.0014	2.06253	3.74405	18.674	9.48994	32.2337	AAEL023652
LOC110676128	20.4532	20.8987	19.6548	9.79385	7.91211	11.9451	19.4122	19.1268	19.2998	15.9686	16.4342	19.2004	AAEL026712
LOC110676129	0.813726	0.894164	0.469221	0.365612	0.319726	0.237729	1.06896	0.926685	0.823758	1.0902	0.790641	0.96603	AAEL024753
LOC110676130	6.57692	5.57036	2.99316	3.84297	5.27866	3.71062	7.34079	4.69067	6.07028	5.96832	7.99319	12.1896	AAEL022720
LOC110676131	3.41754	4.90217	5.60459	4.55254	5.54069	7.04836	4.44673	3.71751	3.50142	8.65617	6.57717	4.13112	AAEL022919
LOC110676132	4.02451	3.18128	3.85396	2.86769	2.34332	3.32676	2.44637	3.31447	3.14428	2.76537	2.91081	4.18638	AAEL026351
LOC110676133	0	0	0	0.0180051	0	0	0	0	0	0	0	0	AAEL022021
LOC110676134	0.550739	2.17939	0.44459	1.58921	0.57271	0.568563	0.875071	1.17051	0.485504	2.40214	2.36157	0.823615	AAEL025515
LOC110676135	5.51023	36.7847	8.5469	3.63435	5.45719	3.77303	5.28093	4.28711	4.71876	8.65505	9.73675	7.23451	AAEL023723				GO:0004252,GO:0006508	serine-type endopeptidase activity,proteolysis
LOC110676136	0.0506757	0	0.0591601	0.0591345	0.0135121	0.0275952	0.0770779	0.0151889	0.0412368	0.0283373	0.0604318	0	AAEL027255
LOC110676137	0.329728	0.0559281	0.159706	0.0543692	0.0571471	0.194514	0.349271	0	0	0.179771	0.0543798	0.145457	AAEL022916
LOC110676138	0.0790134	0	0.153083	0	0	0.139836	0	0	0	0	0	0	AAEL026262
LOC110676139	60.1789	60.3462	36.8902	77.0988	84.5696	63.7894	169.677	160.79	146.818	145.856	143.153	139.449	AAEL026446
LOC110676140	0.257114	0.424948	0.256243	0.669512	0.50394	0.738243	0.343382	0.408748	0.405592	0.651785	0.548334	0.422118	AAEL020416
LOC110676141	0.210244	0.0935356	0.254869	0.152978	0.110341	0.28901	0.12535	0.0976676	0.149385	0.172048	0.0694782	0.0897893	AAEL020227				GO:0003676	nucleic acid binding
LOC110676142	53.7556	40.0301	50.1687	121.715	174.518	185.243	158.094	62.2332	72.3539	77.9167	94.7099	23.5211	AAEL025440
LOC110676143	24.6006	20.5734	8.23723	7.30155	43.7119	6.43597	77.8362	70.698	90.971	63.272	86.2069	156.401	AAEL021060
LOC110676144	22.1195	20.0491	12.0529	7.63653	30.9088	9.5827	60.8948	60.3558	82.8726	54.897	64.4101	142.403	AAEL025773
LOC110676145	1.19309	1.82133	0.963134	5.70515	0.413561	2.4634	2.94887	1.26786	1.89318	89.1162	37.9761	6.14042	AAEL023249
LOC110676146	0	0	0	0	0	0	0	0	0	0	0	0.0372434	AAEL027875
LOC110676147	0.323603	0.823337	0.156739	0	0.673025	0.572702	0.514174	0.171942	0	1.05859	0.160109	0.57102	AAEL020342
LOC110676148	462.914	501.941	148.942	187.421	687.1	197.131	326.297	272.73	267.088	283.464	486.353	425.626	AAEL025092
LOC110676149	13.2536	18.1168	5.49643	10.927	18.917	6.0556	12.6628	2.2093	3.98622	11.0988	13.3721	11.1203	AAEL024968
LOC110676150	0.473712	0.241051	0	0	0.49261	0.20959	0.250895	0.2517	0.501122	0.516545	0.937512	0.208975	AAEL020963
LOC110676151	773.076	439.458	727.595	537.014	360.875	611.58	659.643	693.698	757.963	324.686	388.198	627.46	AAEL022658
LOC110676152	238.113	386.308	152.232	68.28	452.48	43.2231	353.48	215.248	227.014	191.892	306.658	424.13	AAEL027052
LOC110676153	0.0734034	0.0181423	0.0507907	0.297747	0.123221	0.121556	0.113299	0.0568312	0.127569	0.0937617	0.103765	0.0157281	AAEL023448
LOC110676154	0.0907	0.0694034	0.0244429	0.133588	0.0560237	0.0488795	0.110523	0.0724693	0.0151497	0.0438734	0.078954	0.115522	AAEL027961
LOC110676155	3.47153	4.1682	3.62319	2.58664	3.63772	3.19717	3.48943	3.71821	3.22794	3.54889	4.37516	3.36574	AAEL020159
LOC110676156	0.464073	0.875505	0.693119	0.678414	0.25858	0.256197	0.430682	0.708821	0.539285	0.339119	0.507196	0.279278	AAEL024961
LOC110676157	4.51662	6.4145	2.96632	1.69147	3.92727	2.52898	3.83827	4.58275	3.6712	3.50594	3.8886	4.36768	AAEL021017
LOC110676158	0	0	0	0	0.0318442	0.024634	0	0	0.0294495	0.100174	0	0	AAEL025799
LOC110676159	0.385378	0.457571	0.787707	0.889634	0.935088	1.29586	0.272146	0.955569	0.747406	0.700373	0.826249	0.396682	AAEL023446
LOC110676160	0.363793	0.0595784	0.0688621	0	0	0.062903	0	0	0.0751992	0.150468	0.264818	0	AAEL026587
LOC110676161	0.0516385	0.045207	0.0365759	0	0.0115481	0.0226014	0.142335	0.046614	0.0628497	0.128963	0.0423072	0.00832815	AAEL026194
LOC110676162	0.0641142	0	0	0.0269101	0.0666719	0.0206304	0.0679142	0	0	0	0	0	AAEL022754
LOC110676163	0	0.248584	0	0.241655	0	0.32421	0.129367	0.129783	0.258391	0.399515	0.241702	0.215505	AAEL027379
LOC110676164	0.0667963	0	0	0.0280359	0.069461	0.0214934	0.0707553	0	0	0	0	0	AAEL023916
LOC110676165	0.0529817	0.0962859	0.0453668	0.0397809	0.0231203	0.00920909	0.115751	0.138242	0.113095	0.0417817	0.0627256	0.0780473	AAEL026021
LOC110676166	0.0219356	0.0871361	0.053466	0.0623053	0.0161882	0.0388209	0.0412246	0.0428609	0.0381756	0.038579	0.078422	0.0892755	AAEL020765
LOC110676167	0.223813	0.113889	0.487825	0.276786	0.349113	0.247561	0.118539	0.2973	0.236763	0.244051	0.166104	0	AAEL026914
LOC110676168	0.0595652	0.237132	0.173105	0.0745298	0.0182181	0.0496079	0.0835089	0.161969	0.209421	0.0191033	0.0849459	0.400334	AAEL021177
LOC110676169	0.412557	0.555154	0.395209	0.773995	1.06459	0.770693	0.364174	0.466016	0.396018	0.528169	0.529201	0.562167	AAEL021504
LOC110676170	0	0	0	0.64638	0.595166	0.674746	0	0	0	0	0	0.0776864	AAEL022753
LOC110676171	0.143316	0	0.0347081	0.530292	0.551425	1.10332	0	0	0	0	0	0.305999	AAEL027030
LOC110676172	0.340977	0.231345	1.21114	0.730913	0.472774	0.854889	0	0.241564	0.0601178	0.247872	0	0.15042	AAEL022641
LOC110676173	28.5376	23.5425	25.9694	16.1487	41.8163	15.2089	44.4276	37.7928	42.7675	16.1484	23.1047	71.1478	AAEL019526
LOC110676174	0	0.186103	0.118095	0.165839	0.396164	0.0404533	0.0161418	0.0161937	0.0161204	0.598195	0.301584	0.188228	AAEL025343				GO:0042302	structural constituent of cuticle
LOC110676175	0	0.271276	0	0	0.104206	0.0585241	0	0.0702824	0.0360422	0.0437077	0.0337144	0	AAEL020566
LOC110676176	0.723014	0.849024	0.700394	0.605263	0.809693	0.639784	0.353477	0.827428	0.235338	0.606453	0.0550346	0.245348	AAEL024269
LOC110676177	0.786148	0.874096	2.00788	0.478728	0.513605	0.638611	0.630209	0.809498	0.72244	0.692434	0.943421	1.50903	AAEL020461
LOC110676178	0	0	0	0	0	0	0	0	0	0	0	0	AAEL028064
LOC110676179	0	0	0	0.0124019	0.0253044	0	0	0.0109703	0.0132608	0	0.107991	0.0214692	AAEL023546
LOC110676180	0.390813	0.397735	0	0	0	0	0	0	0	0	0	0	AAEL021652
LOC110676181	4.2635	4.64712	4.11326	0.901315	0.954603	2.31868	3.27398	2.62626	3.05686	2.93921	2.81535	1.95142	AAEL022999
LOC110676182	1.59599	1.17308	0.343568	0.877213	0.461016	0.235378	0.845291	0.848005	0.562778	0.193366	0.965122	0.391143	AAEL026680
LOC110676183	2.1169	1.64946	1.79434	0.261793	0.481546	0.4484	1.02729	2.22567	1.4696	1.04595	0.916455	0.603504	AAEL022322
LOC110676184	0	0	0	0	0	0	0	0	0	0	0	0	AAEL027604
LOC110676185	0.0740337	0.216617	0.0466164	0.0427262	0.00769872	0.0256586	0.069926	0.0819515	0.0737489	0.113019	0.045787	0.0653188	AAEL021968
LOC110676186	0.0395421	0.121947	0.029019	0.29637	0.196876	0.0349902	0	0.162988	0.0316894	0.0875416	0.0391284	0.150122	AAEL025519
LOC110676187	0.0693435	0.0940956	0.067174	0.0914728	0.0480732	0.0613609	0.048969	0.0491262	0.0733557	0.050409	0.0457453	0.0203936	AAEL021251
LOC110676188	0.887435	0.225788	0.429835	0.219495	0.230709	0.981596	0	0.707288	0.704087	0	1.31723	0.195743	AAEL024549
LOC110676189	119.855	461.13	38.0234	139.635	85.8887	162.511	215.56	1.64495	15.4393	10.9714	9.08107	3.70697	AAEL020059
LOC110676190	525.003	491.532	199.436	611.959	462.293	265.527	821.672	1069.23	1012.34	624.051	683.903	706.933	AAEL025037
LOC110676191	0.429828	0.729652	0.529636	0.23984	0.448763	0.527923	0.218546	0.233864	0.667497	1.8279	0.704348	0.327655	AAEL021189
LOC110676192	6.68876	5.28502	6.34175	4.74377	3.91605	5.46235	3.99724	5.50749	5.19264	4.59266	4.80738	6.96214	AAEL025805
LOC110676193	0.288919	0.144526	0.118593	0.842987	0.236791	0.665149	0.474626	0.0806592	0.626813	0.899741	0.8165	0.1793	AAEL022502
LOC110676194	0	0	0	0	0	0	0	0	0	0	0	0	AAEL026986
LOC110676195	0.180356	0.412989	0.285469	0.0318633	0.0334913	0.14392	0.0989344	0.174547	0.361141	0.210711	0.0525846	0.265682	AAEL024120
LOC110676196	2.50137	4.90241	2.58466	1.46613	0.31792	3.21389	3.56228	2.97357	2.65551	4.94958	4.79419	1.60173	AAEL020353
LOC110676197	0.660633	0.648345	1.13861	1.3658	1.10435	1.26838	1.01763	0.947781	0.904404	1.679	1.38687	0.824556	AAEL024221
LOC110676198	0.0773861	0.049651	0.0358528	0.126493	0.0524826	0.0640118	0.162163	0.0303915	0.0195761	0.0605358	0.0332941	0.0994463	AAEL021631
LOC110676199	8.46761	6.46319	7.60908	10.3615	6.4882	10.9435	5.95998	5.86072	6.83603	4.8596	4.85101	5.75058	AAEL025613				GO:0016746	transferase activity, transferring acyl groups
LOC110676200	1.937	2.1909	2.16568	0.407864	0.347629	0.144341	1.52065	0.764293	0.588277	0.888713	1.68501	1.00996	AAEL024240
LOC110676201	49.7121	40.0049	44.7211	37.1938	21.4526	29.0822	25.2961	26.508	26.5131	47.8904	50.5958	30.3527	AAEL021375				GO:0004553,GO:0005975	hydrolase activity, hydrolyzing O-glycosyl compounds,carbohydrate metabolic process
LOC110676202	0.137871	0.175392	0.133558	0.204604	0.0358429	0.1525	0.109532	0.073256	0.0364622	0.112753	0.0341073	0.0608209	AAEL026074				GO:0004222,GO:0005886,GO:0006508,GO:0008233,GO:0008237,GO:0016787,GO:0046872	metalloendopeptidase activity,plasma membrane,proteolysis,peptidase activity,metallopeptidase activity,hydrolase activity,metal ion binding
LOC110676203	5.60214	4.12858	7.01751	3.0579	6.2274	5.3846	3.0694	3.28454	3.06532	5.89804	2.67619	2.64178	AAEL022291
LOC110676204	0	0	0	0	0	0.0386395	0	0	0	0	0	0	AAEL026959
LOC110676205	0	0	0	0.120541	0.040593	0.0345421	0	0.104334	0.0412944	0.128986	0	0.0344407	AAEL023201
LOC110676206	0.227828	0	0.0735667	0.2254	0.236917	0.235202	0.482663	0.40351	0.160674	0.0828094	0.225444	0.402018	AAEL027854
LOC110676207	0.371296	0.419858	0.759324	0.326524	0.815117	0.146024	0.524403	0.438406	0.261853	0.269912	0.489882	0.218392	AAEL025086
LOC110676208	14.815	12.6191	21.8392	12.108	11.5545	17.5981	8.6994	14.3744	11.5838	10.0088	9.24215	9.80326	AAEL020327
LOC110676209	5.04616	9.97929	8.6656	8.16937	11.9261	7.71273	10.4475	8.65297	9.09909	10.3796	8.51142	7.28533	AAEL025719
LOC110676210	0	0	0	0.0179644	0	0	0	0.0154366	0.0153668	0	0.0416855	0	AAEL022039
LOC110676211	0.535025	0.380709	0.316028	0.628304	0.357343	0.646643	0.340963	0.439128	0.418735	0.341504	0.443342	0.353074	AAEL022722
LOC110676212	0.189725	0.165872	0.21586	0.282186	0.365458	0.370699	0.287293	0.300394	0.208785	0.488737	0.356581	0.30108	AAEL027457
LOC110676213	0	0	0.0155271	0	0	0	0	0	0	0	0	0	AAEL020334				GO:0003676	nucleic acid binding
LOC110676214	0.0175192	0.0178295	0	0.0614517	0	0.0314747	0	0.0186171	0.0185329	0	0	0	AAEL025060				GO:0008270	zinc ion binding
LOC110676215	0.413802	0.556829	0.396402	0.77633	1.06781	0.773018	0.365273	0.467422	0.397213	0.529763	0.530797	0.563862	AAEL020877
LOC110676216	0.399187	0.115414	0.121576	0.149596	0.157239	0	0.381203	0.165504	0.159956	0	0.209475	0.322847	AAEL025595
LOC110676217	0.234668	0	0	0.464335	1.22015	0.830616	0	0	0.496492	0	0	0	AAEL022073
LOC110676218	0.131196	0.13352	0.127091	0.259596	0.40929	0.34828	0.173715	0.418254	0.0693935	0.286117	0.194735	0.231504	AAEL022241
LOC110676219	0.706861	0.359691	0.171187	0.699329	0.36753	0.781863	0	0.37558	0.560821	0.578081	0	0	AAEL027420
LOC110676220	0.254423	0.0321652	0.0183699	0.0171977	0.244853	0.209753	0.0401743	0.0403033	0.397866	0	0.175138	0.016731	AAEL022997
LOC110676221	23.5717	21.5496	23.7373	18.3139	23.2657	19.9155	15.7995	14.2935	14.2288	13.0693	13.4416	16.0971	AAEL026834
LOC110676222	0.0943099	0.113009	0.0736769	0.0857804	0.329016	0.267858	0.813698	0.392799	0.74825	0.389787	0.142995	0.193258	AAEL022329
LOC110676223	9.51085	8.01357	7.75631	9.54081	13.8924	11.2735	12.0895	14.6197	12.401	12.0109	11.2936	8.93769	AAEL027472				GO:0000166,GO:0003676,GO:0003724,GO:0004386,GO:0005524,GO:0016787	nucleotide binding,nucleic acid binding,RNA helicase activity,helicase activity,ATP binding,hydrolase activity
LOC110676224	54.5334	51.4709	62.5067	65.0166	57.9079	77.2637	54.224	63.1785	62.6486	60.7634	58.07	52.8271	AAEL020597				GO:0005515,GO:0005737,GO:0016020	protein binding,cytoplasm,membrane
LOC110676225	0.0630296	0	0	0	0	0.028732	0.0343942	0	0.0505125	0.0249922	0	0	AAEL024305
LOC110676226	0.0613011	0.383774	0.111569	0.251781	0.212489	0.463543	0.275479	0.195429	0.147382	0.19243	0.183818	0.504794	AAEL022063
LOC110676227	0.032125	0.108871	0.01556	0.047674	0.0835164	0.184775	0	0	0.0112146	0.0350297	0.158944	0.736928	AAEL023113
LOC110676228	0	0	0	0	0.0159494	0	0	0	0	0	0	0	AAEL026682
LOC110676229	0	0	0	0	0.0159494	0	0	0	0	0	0	0	AAEL024016
LOC110676230	13.9603	11.2084	13.0765	15.0702	17.4681	16.3365	14.5799	21.7677	18.714	13.3602	13.2494	10.2463	AAEL023044
LOC110676231	6.88985	42.8409	37.7396	17.2628	147.139	19.4302	36.5504	0.773832	3.08132	6.71879	4.43432	100.498	AAEL027975				GO:0042302	structural constituent of cuticle
LOC110676232	3339.31	3098.15	3166.69	2577.43	2739.34	2823.21	2870.67	3046.28	3039.97	2900.68	2870.68	3189.37	AAEL023983	40S ribosomal protein S4 [Source:UniProtKB/TrEMBL;Acc:Q1HRS6]			GO:0003723,GO:0003735,GO:0005840,GO:0006412,GO:0019843	RNA binding,structural constituent of ribosome,ribosome,translation,rRNA binding
LOC110676233	2.21554	1.16507	1.00902	2.71439	2.23828	2.6233	1.84919	2.52855	2.14339	2.1114	2.4146	2.23108	AAEL024833
LOC110676234	0.0671284	0.0287653	0.0581832	0.0230698	0.101403	0.0562746	0.100298	0.037545	0.0740026	0.0462304	0.06293	0.0155859	AAEL023359				GO:0003676,GO:0008270	nucleic acid binding,zinc ion binding
LOC110676235	33.2029	39.1597	31.2724	36.8151	35.7986	40.2857	31.8915	34.3396	31.6959	36.9417	35.6765	27.9748	AAEL022750				GO:0005515	protein binding
LOC110676236	0.0601963	0.0306312	0.145782	0.327552	0.156494	0.133167	0.031882	0.383813	0.222877	0.131278	0.0297832	0.132776	AAEL021173				GO:0007155,GO:0007229,GO:0008305,GO:0016020,GO:0016021	cell adhesion,integrin-mediated signaling pathway,integrin complex,membrane,integral component of membrane
LOC110676237	0.108869	0	0	0.311639	0.276238	0.160561	0.0507416	0	0.158165	0.0522338	0.0474013	0	AAEL024122
LOC110676238	0	0	0	0	0	0.595458	0.356403	0	0	0	0	0	AAEL026234
LOC110676239	0.273111	0.35134	0.185791	0.0758993	0.27922	0.390341	0.487582	0.366861	0.202889	0.25096	0.421323	0.304587	AAEL020809
LOC110676240	7.76225	11.1964	5.16838	3.81001	5.54814	4.29515	5.3222	4.88102	4.01021	8.03762	8.72304	7.25553	AAEL025610				GO:0005515	protein binding
LOC110676241	0.436089	0.35226	0.530339	0.353884	0.431213	0.337368	0.525463	0.584964	0.471291	0.383966	0.403973	0.524219	AAEL020164
LOC110676242	2.76599	1.86775	2.29304	2.1681	1.30246	1.24195	2.03965	2.10551	2.77496	1.66467	2.27411	2.15797	AAEL024526
LOC110676243	0.238524	0	0	0	0	0.200513	0	0	0.504651	0	0.354043	0	AAEL023899
LOC110676244	24.6506	21.966	34.3056	28.3381	29.3647	32.7194	20.7177	23.3053	19.8943	17.7935	18.2086	16.3882	AAEL027354				GO:0005975,GO:0016773	carbohydrate metabolic process,phosphotransferase activity, alcohol group as acceptor
LOC110676245	0.239659	0.446974	0.184539	0.580069	0.461603	0.675876	0.31398	0.353401	0.328858	0.599126	0.520805	0.34444	AAEL023079
LOC110676247	0.483379	0.812516	0.0703088	0.502643	0.276238	0.57802	0.461288	0.462768	0.307116	0.39571	0.359101	0.192107	AAEL025581
LOC110676248	0.0539911	0	0	0.106832	0.22458	0	0	0	0	0	0.0534263	0.0476355	AAEL020843
[truncated: 17,262 more rows]
