# Supplementary material for: Engineered Antiviral Sensor Targets Infected Mosquitoes
Source: bioRxiv preprint, doi:10.1101/2023.01.27.525922, version 1 (2023-01-27)
Supplement: Table S7 [file 525922_file09.xlsx]

## Sheet: Table S7
NCBI_ID	baseMean	log2FoldChange	lfcSE	stat	pvalue	padj	AAEL_ID	gene_description	gene_name	gene_synomym	GO_ID	GO_name
LOC23687599	3710.43	-5.11576	0.123312	-41.4864	0	0	AAEL017179				GO:0055114	oxidation-reduction process
LOC5568355	11314.7	-4.05859	0.103381	-39.2587	0	0	AAEL001061	glutathione S-transferase (GSTD1) [Source:VB Community Annotation]	GSTD1		GO:0005515	protein binding
LOC5571611	2613.46	3.50647	0.0850005	41.2523	0	0	AAEL009195				GO:0016020,GO:0016021,GO:0022857,GO:0055085	membrane,integral component of membrane,transmembrane transporter activity,transmembrane transport
LOC5580033	1944.33	-4.16132	0.108376	-38.3972	0	0	AAEL010229				GO:0016020,GO:0016021	membrane,integral component of membrane
LOC110674122	5858.16	-4.63933	0.126647	-36.6318	8.90591e-294	2.7131e-290	AAEL027536	Putative alpha amylase catalytic domain family found in maltase [Source:UniProtKB/TrEMBL;Acc:A0A0P6IY06]			GO:0016020,GO:0016021	membrane,integral component of membrane
LOC5566023	2765.08	-3.81717	0.106498	-35.8425	2.4109e-281	6.12046e-278	AAEL019551
LOC5568749	59418.8	-4.91145	0.140481	-34.9618	8.57264e-268	1.86541e-264	AAEL007097	4-nitrophenylphosphatase [Source:UniProtKB/TrEMBL;Acc:Q0IF18]			GO:0016787	hydrolase activity
LOC5568403	18530.6	-2.98413	0.0857195	-34.8127	1.56322e-265	2.97638e-262	AAEL006820	lipid storage droplets surface binding protein 2 (lsd2) [Source:VB Community Annotation]
LOC5571775	1842.38	3.26663	0.0938675	34.8004	2.39873e-265	4.05971e-262	AAEL009291	retinoid-inducible serine carboxypeptidase (serine carboxypeptidase [Source:VB Community Annotation]			GO:0004180,GO:0004185,GO:0006508,GO:0008233,GO:0016787	carboxypeptidase activity,serine-type carboxypeptidase activity,proteolysis,peptidase activity,hydrolase activity
LOC5567751	1306.11	3.95844	0.115097	34.3921	3.30608e-259	5.03582e-256	AAEL025859				GO:0016787	hydrolase activity
LOC5580187	2697.73	-3.57677	0.107666	-33.2212	5.32899e-242	7.37919e-239	AAEL002554	anosmin, putative [Source:VB Community Annotation]			GO:0005515,GO:0005576,GO:0010466,GO:0030414	protein binding,extracellular region,negative regulation of peptidase activity,peptidase inhibitor activity
LOC110676965	8488.9	-4.57097	0.140317	-32.576	8.9803e-233	1.1399e-229	AAEL026917				GO:0003677,GO:0046983	DNA binding,protein dimerization activity
LOC5577714	47050.9	-3.38063	0.103903	-32.5364	3.25597e-232	3.815e-229	AAEL013338	lethal(2)essential for life protein, l2efl [Source:VB Community Annotation]			GO:0046872	metal ion binding
LOC5570170	2082.83	-4.32346	0.134158	-32.2266	7.47865e-228	8.13677e-225	AAEL008137				GO:0005515	protein binding
LOC5568414	4219.23	-3.5408	0.110216	-32.1261	1.90527e-226	1.93474e-223	AAEL006830	yellow protein precursor [Source:VB Community Annotation]			GO:0042438,GO:0060179	melanin biosynthetic process,male mating behavior
LOC5564679	15432.8	-4.6525	0.150332	-30.9481	2.69502e-210	2.56566e-207	AAEL004390	heme peroxidase [Source:VB Community Annotation]	HPX8B		GO:0004601,GO:0006979,GO:0020037,GO:0048477,GO:0055114,GO:0098869	peroxidase activity,response to oxidative stress,heme binding,oogenesis,oxidation-reduction process,cellular oxidant detoxification
LOC5570231	2412.74	-4.35969	0.144257	-30.2218	1.22549e-200	1.09804e-197	AAEL008182				GO:0005515	protein binding
LOC110677952	4161.84	2.90558	0.0963986	30.1413	1.39468e-199	1.11809e-196	AAEL028182				GO:0000287,GO:0004450,GO:0006102,GO:0016616,GO:0051287,GO:0055114	magnesium ion binding,isocitrate dehydrogenase (NADP+) activity,isocitrate metabolic process,oxidoreductase activity, acting on the CH-OH group of donors, NAD or NADP as acceptor,NAD binding,oxidation-reduction process
LOC5576561	4161.84	2.90558	0.0963986	30.1413	1.39468e-199	1.11809e-196	AAEL020590				GO:0000287,GO:0004450,GO:0006097,GO:0006099,GO:0006102,GO:0016491,GO:0016616,GO:0046872,GO:0051287,GO:0055114	magnesium ion binding,isocitrate dehydrogenase (NADP+) activity,glyoxylate cycle,tricarboxylic acid cycle,isocitrate metabolic process,oxidoreductase activity,oxidoreductase activity, acting on the CH-OH group of donors, NAD or NADP as acceptor,metal ion binding,NAD binding,oxidation-reduction process
LOC5569198	1174.87	-3.03285	0.100711	-30.1143	3.14801e-199	2.39752e-196	AAEL007458	amino acid transporter [Source:VB Community Annotation]			GO:0016020,GO:0016021	membrane,integral component of membrane
LOC110676042	16561.1	2.88865	0.0977036	29.5654	4.16276e-192	3.01939e-189	AAEL027928				GO:0046872	metal ion binding
LOC5573684	16529.5	2.88576	0.0977043	29.5356	1.00507e-191	6.95876e-189	AAEL010660	alpha-B-crystallin, putative [Source:VB Community Annotation]			GO:0046872	metal ion binding
LOC5579064	2869.34	-4.78941	0.163413	-29.3086	8.06092e-189	5.33843e-186	AAEL024562
LOC5577338	14374.1	-3.57064	0.121956	-29.2781	1.97101e-188	1.25094e-185	AAEL000442	protein oskar [Source:VB Community Annotation]	osk
LOC5572391	1202.99	-2.79627	0.0955493	-29.2652	2.88023e-188	1.75487e-185	AAEL009782	brain chitinase and chia [Source:VB Community Annotation]			GO:0004553,GO:0005975,GO:0008061,GO:0008152,GO:0016787,GO:0016798	hydrolase activity, hydrolyzing O-glycosyl compounds,carbohydrate metabolic process,chitin binding,metabolic process,hydrolase activity,hydrolase activity, acting on glycosyl bonds
LOC5578018	1897.95	-3.54669	0.121562	-29.176	3.9055e-187	2.28802e-184	AAEL003382	Ro ribonucleoprotein autoantigen, putative [Source:VB Community Annotation]			GO:0003723,GO:0005737	RNA binding,cytoplasm
LOC5575710	1414.76	-3.43996	0.1189	-28.9317	4.77098e-184	2.69154e-181	AAEL012018
LOC5573744	2611.87	-3.2919	0.11421	-28.8233	1.09555e-182	5.95979e-180	AAEL019937	Superoxide dismutase [Cu-Zn] [Source:UniProtKB/TrEMBL;Acc:Q1HRN3]			GO:0004784,GO:0006801,GO:0016209,GO:0016491,GO:0019430,GO:0046872,GO:0055114,GO:0098869	superoxide dismutase activity,superoxide metabolic process,antioxidant activity,oxidoreductase activity,removal of superoxide radicals,metal ion binding,oxidation-reduction process,cellular oxidant detoxification
LOC5577588	1065.34	-3.43564	0.119234	-28.8143	1.42058e-182	7.46149e-180	AAEL013295				GO:0005768,GO:0005770,GO:0016020,GO:0016021	endosome,late endosome,membrane,integral component of membrane
LOC5567942	10034.8	-2.46239	0.0863551	-28.5147	7.70474e-179	3.91195e-176	AAEL006389	cathepsin l [Source:VB Community Annotation]			GO:0006508,GO:0008234	proteolysis,cysteine-type peptidase activity
LOC5578405	995.234	-4.11101	0.147204	-27.9273	1.24537e-171	6.11917e-169	AAEL013692	PIWI [Source:VB Community Annotation]	PIWI3		GO:0003676,GO:0005515,GO:0031047	nucleic acid binding,protein binding,gene silencing by RNA
LOC5573133	7394.01	3.22384	0.116254	27.7311	2.94796e-169	1.40323e-166	AAEL001963	protein serine/threonine kinase, putative [Source:VB Community Annotation]
LOC5573815	1881.88	4.04931	0.147818	27.394	3.2362e-165	1.49375e-162	AAEL000599	wingless protein, putative [Source:VB Community Annotation]			GO:0005102,GO:0005576,GO:0007275,GO:0016055	signaling receptor binding,extracellular region,multicellular organism development,Wnt signaling pathway
LOC5566868	1181.49	-3.76182	0.137456	-27.3674	6.69703e-165	3.00027e-162	AAEL000800	microsomal dipeptidase [Source:VB Community Annotation]			GO:0006508,GO:0008233,GO:0008235,GO:0008237,GO:0008239,GO:0016020,GO:0016787,GO:0016805,GO:0031225,GO:0046872,GO:0070573	proteolysis,peptidase activity,metalloexopeptidase activity,metallopeptidase activity,dipeptidyl-peptidase activity,membrane,hydrolase activity,dipeptidase activity,anchored component of membrane,metal ion binding,metallodipeptidase activity
LOC5566358	6626.89	-2.53962	0.0930063	-27.3059	3.6105e-164	1.57129e-161	AAEL005312				GO:0005515	protein binding
LOC110676335	729.077	-5.26272	0.193732	-27.165	1.68439e-162	7.12684e-160	AAEL025551
LOC5569904	3409.44	4.69493	0.174371	26.9249	1.122e-159	4.61902e-157	AAEL007997
LOC5567245	2881.8	2.30149	0.0859018	26.7921	3.99381e-158	1.60089e-155	AAEL019654				GO:0005086,GO:0005515,GO:0005737,GO:0032012	ARF guanyl-nucleotide exchange factor activity,protein binding,cytoplasm,regulation of ARF protein signal transduction
LOC5567181	4466.45	-3.40126	0.127039	-26.7733	6.61033e-158	2.58176e-155	AAEL000923
LOC5576737	3343.07	-3.05529	0.114129	-26.7706	7.11376e-158	2.70892e-155	AAEL002978	leucyl aminopeptidase, putative [Source:VB Community Annotation]			GO:0004177,GO:0005737,GO:0006508,GO:0008233,GO:0008235,GO:0016787,GO:0019538,GO:0030145,GO:0070006	aminopeptidase activity,cytoplasm,proteolysis,peptidase activity,metalloexopeptidase activity,hydrolase activity,protein metabolic process,manganese ion binding,metalloaminopeptidase activity
LOC5571135	1567.21	-4.13403	0.155153	-26.6449	2.04976e-156	7.61511e-154	AAEL008829
LOC110676337	737.648	-4.85744	0.182567	-26.6064	5.72039e-156	2.0746e-153	AAEL027550
LOC5570832	3463.72	-3.02079	0.113884	-26.5252	4.96387e-155	1.75836e-152	AAEL008595	Protein maelstrom homolog [Source:UniProtKB/Swiss-Prot;Acc:Q16YA8]	mael		GO:0003677,GO:0005634,GO:0005737,GO:0007275,GO:0030154,GO:0031047,GO:0051321,GO:0060964	DNA binding,nucleus,cytoplasm,multicellular organism development,cell differentiation,gene silencing by RNA,meiotic cell cycle,regulation of gene silencing by miRNA
LOC5569696	2611.27	3.46758	0.130745	26.5217	5.45192e-155	1.88736e-152	AAEL007842				GO:0000139,GO:0005789,GO:0005794,GO:0005886,GO:0010008,GO:0016020,GO:0016021,GO:0016055,GO:0017147,GO:0042734,GO:0042995,GO:0045211	Golgi membrane,endoplasmic reticulum membrane,Golgi apparatus,plasma membrane,endosome membrane,membrane,integral component of membrane,Wnt signaling pathway,Wnt-protein binding,presynaptic membrane,cell projection,postsynaptic membrane
LOC110676336	694.714	-5.2418	0.197846	-26.4944	1.12511e-154	3.80837e-152	AAEL023947
LOC5578354	1045.5	-3.32597	0.126165	-26.362	3.73895e-153	1.23808e-150	AAEL003508	serine-pyruvate aminotransferase [Source:VB Community Annotation]			GO:0003824,GO:0004760,GO:0008453	catalytic activity,serine-pyruvate transaminase activity,alanine-glyoxylate transaminase activity
LOC5570734	1112.21	-6.37974	0.24208	-26.3539	4.63381e-153	1.50175e-150	AAEL008511				GO:0005515,GO:0008270	protein binding,zinc ion binding
LOC5574593	3222.04	-3.5016	0.133182	-26.2919	2.37342e-152	7.53165e-150	AAEL002422	cytoplasmic polyadenylation element binding protein (cpeb) [Source:VB Community Annotation]			GO:0003676,GO:0003723,GO:0003730,GO:0006417,GO:0045182	nucleic acid binding,RNA binding,mRNA 3'-UTR binding,regulation of translation,translation regulator activity
LOC110676307	898.554	4.73624	0.180428	26.25	7.14674e-152	2.22162e-149	AAEL025437				GO:0016491,GO:0055114	oxidoreductase activity,oxidation-reduction process
LOC5577711	2661.35	5.19569	0.198986	26.1109	2.74468e-150	8.36141e-148	AAEL013346	lethal(2)essential for life protein, l2efl [Source:VB Community Annotation]			GO:0046872	metal ion binding
LOC5572877	968.645	-3.00619	0.115198	-26.0959	4.0613e-150	1.21297e-147	AAEL010109				GO:0016020,GO:0016021	membrane,integral component of membrane
LOC5576633	788.331	-3.49169	0.133943	-26.0684	8.31348e-150	2.43521e-147	AAEL012659	protein serine/threonine kinase, putative [Source:VB Community Annotation]			GO:0004672,GO:0005524,GO:0006468	protein kinase activity,ATP binding,protein phosphorylation
LOC5576861	2576.48	-3.05133	0.117353	-26.0013	4.78866e-149	1.37624e-146	AAEL012840	stathmin [Source:VB Community Annotation]			GO:0031110	regulation of microtubule polymerization or depolymerization
LOC5576841	4670.38	-1.87094	0.0722854	-25.8827	1.04387e-147	2.94448e-145	AAEL012827	endoplasmin [Source:VB Community Annotation]			GO:0000166,GO:0005524,GO:0006457,GO:0051082	nucleotide binding,ATP binding,protein folding,unfolded protein binding
LOC5571658	11520.7	-4.60831	0.178525	-25.8133	6.28577e-147	1.74082e-144	AAEL001666				GO:0005777,GO:0010468	peroxisome,regulation of gene expression
LOC5564117	12886.7	-3.45725	0.133975	-25.8052	7.74685e-147	2.10714e-144	AAEL019408	2-Cys thioredoxin peroxidase [Source:UniProtKB/TrEMBL;Acc:Q8WSF6]			GO:0004601,GO:0005623,GO:0016209,GO:0016491,GO:0045454,GO:0051920,GO:0055114,GO:0098869	peroxidase activity,obsolete cell,antioxidant activity,oxidoreductase activity,cell redox homeostasis,peroxiredoxin activity,oxidation-reduction process,cellular oxidant detoxification
LOC5569526	1551.88	-3.14569	0.122003	-25.7838	1.34779e-146	3.60168e-144	AAEL007696	TOLL pathway signalling NF-kappaB Relish-like transcription factor [Source:VB Community Annotation]	REL1A		GO:0002218,GO:0003677,GO:0003700,GO:0005634,GO:0005737,GO:0006355,GO:0006357,GO:0042025	activation of innate immune response,DNA binding,DNA-binding transcription factor activity,nucleus,cytoplasm,regulation of transcription, DNA-templated,regulation of transcription by RNA polymerase II,host cell nucleus
LOC5578728	913.19	4.47743	0.173951	25.7395	4.22156e-146	1.10867e-143	AAEL013840				GO:0007165,GO:0008083,GO:0016020	signal transduction,growth factor activity,membrane
LOC5574112	2772.99	-3.27811	0.127473	-25.7161	7.71251e-146	1.99114e-143	AAEL002261	GTP cyclohydrolase i [Source:VB Community Annotation]			GO:0003824,GO:0003934,GO:0005737,GO:0006729,GO:0008152,GO:0016787,GO:0035998,GO:0046654	catalytic activity,GTP cyclohydrolase I activity,cytoplasm,tetrahydrobiopterin biosynthetic process,metabolic process,hydrolase activity,7,8-dihydroneopterin 3'-triphosphate biosynthetic process,tetrahydrofolate biosynthetic process
LOC5569520	5021.99	-3.06121	0.119227	-25.6755	2.19709e-145	5.57767e-143	AAEL007707	malate dehydrogenase [Source:VB Community Annotation]			GO:0003824,GO:0005975,GO:0006099,GO:0006108,GO:0016491,GO:0016615,GO:0016616,GO:0019752,GO:0030060,GO:0055114	catalytic activity,carbohydrate metabolic process,tricarboxylic acid cycle,malate metabolic process,oxidoreductase activity,malate dehydrogenase activity,oxidoreductase activity, acting on the CH-OH group of donors, NAD or NADP as acceptor,carboxylic acid metabolic process,L-malate dehydrogenase activity,oxidation-reduction process
LOC5565883	5053.4	-3.37383	0.131429	-25.6703	2.50675e-145	6.25948e-143	AAEL019474				GO:0003676,GO:0003723	nucleic acid binding,RNA binding
LOC5572898	41424.6	-4.33239	0.16908	-25.6233	8.39568e-145	2.04918e-142	AAEL010097				GO:0003723,GO:0042803,GO:0045450	RNA binding,protein homodimerization activity,bicoid mRNA localization
LOC5568428	2244.09	-2.92269	0.114066	-25.6229	8.47548e-145	2.04918e-142	AAEL006836	dihydropteridine reductase [Source:VB Community Annotation]			GO:0016491,GO:0055114	oxidoreductase activity,oxidation-reduction process
LOC5575534	783.336	3.56989	0.139718	25.5507	5.39684e-144	1.28445e-141	AAEL011910				GO:0005515	protein binding
LOC5570163	1079.28	3.94137	0.154587	25.4961	2.17675e-143	5.10096e-141	AAEL008144	AMP dependent ligase [Source:VB Community Annotation]			GO:0003824	catalytic activity
LOC5571498	1200.91	-3.2312	0.126769	-25.4888	2.62317e-143	6.05396e-141	AAEL001626	zinc/iron transporter [Source:VB Community Annotation]			GO:0016020,GO:0016021,GO:0030001,GO:0046873,GO:0055085	membrane,integral component of membrane,metal ion transport,metal ion transmembrane transporter activity,transmembrane transport
LOC5574166	1136.8	3.36643	0.132135	25.4772	3.52721e-143	8.01888e-141	AAEL019623				GO:0007165	signal transduction
LOC5578270	821.066	3.99729	0.157227	25.4236	1.38242e-142	3.09662e-140	AAEL008639				GO:0000139,GO:0005509,GO:0005794,GO:0005886,GO:0007156,GO:0016020,GO:0042995	Golgi membrane,calcium ion binding,Golgi apparatus,plasma membrane,homophilic cell adhesion via plasma membrane adhesion molecules,membrane,cell projection
LOC5567259	1406.95	-2.91056	0.114486	-25.4229	1.40702e-142	3.10605e-140	AAEL005931	6-phosphogluconate dehydrogenase [Source:VB Community Annotation]			GO:0004616,GO:0006098,GO:0016491,GO:0019521,GO:0050661,GO:0055114	phosphogluconate dehydrogenase (decarboxylating) activity,pentose-phosphate shunt,oxidoreductase activity,D-gluconate metabolic process,NADP binding,oxidation-reduction process
LOC5569133	1164.69	-3.87842	0.154198	-25.1522	1.3359e-139	2.90692e-137	AAEL019707				GO:0016020,GO:0016021	membrane,integral component of membrane
LOC5573276	2084.12	3.9489	0.157205	25.1195	3.048e-139	6.53904e-137	AAEL010377				GO:0005634,GO:0031144,GO:0071630	nucleus,proteasome localization,nuclear protein quality control by the ubiquitin-proteasome system
LOC5564696	718.144	-3.48924	0.139007	-25.1011	4.83597e-139	1.02308e-136	AAEL004396	GPCR Octopamine/Tyramine Family [Source:VB Community Annotation]	GPROAR4		GO:0004930,GO:0007165,GO:0007186,GO:0016020,GO:0016021	G protein-coupled receptor activity,signal transduction,G protein-coupled receptor signaling pathway,membrane,integral component of membrane
LOC5564863	632.957	-3.82976	0.153326	-24.9779	1.06175e-137	2.21542e-135	AAEL026837				GO:0016020,GO:0016021,GO:0022857,GO:0055085	membrane,integral component of membrane,transmembrane transporter activity,transmembrane transport
LOC5569465	4133.12	-3.97347	0.159205	-24.9582	1.73772e-137	3.55615e-135	AAEL007657	low-density lipoprotein receptor (ldl) [Source:VB Community Annotation]			GO:0005509,GO:0005515,GO:0006897,GO:0016020,GO:0016021	calcium ion binding,protein binding,endocytosis,membrane,integral component of membrane
LOC5568348	1000.37	3.91436	0.156838	24.9579	1.751e-137	3.55615e-135	AAEL001062
LOC5574050	4786.75	3.4636	0.138884	24.9389	2.82042e-137	5.58985e-135	AAEL010898				GO:0016020,GO:0016021	membrane,integral component of membrane
LOC5569638	1442.52	-3.10259	0.124408	-24.9388	2.82575e-137	5.58985e-135	AAEL007783	centromere protein-A, putative [Source:VB Community Annotation]			GO:0000786,GO:0003677,GO:0046982	nucleosome,DNA binding,protein heterodimerization activity
LOC5576477	11952.9	3.45303	0.138562	24.9205	4.46566e-137	8.72064e-135	AAEL002887	Armadillo segment polarity protein [Source:UniProtKB/Swiss-Prot;Acc:Q17GS9]	arm		GO:0005515,GO:0005737,GO:0005886,GO:0005912,GO:0007155,GO:0007275,GO:0007367,GO:0008134,GO:0014017,GO:0016020,GO:0016055,GO:0030054,GO:0045296,GO:0060070	protein binding,cytoplasm,plasma membrane,adherens junction,cell adhesion,multicellular organism development,segment polarity determination,transcription factor binding,neuroblast fate commitment,membrane,Wnt signaling pathway,cell junction,cadherin binding,canonical Wnt signaling pathway
LOC5570448	767.53	3.07941	0.123576	24.9192	4.60457e-137	8.87807e-135	AAEL008347	monocarboxylate transporter [Source:VB Community Annotation]			GO:0016020,GO:0016021,GO:0022857,GO:0055085	membrane,integral component of membrane,transmembrane transporter activity,transmembrane transport
LOC5573035	2251.32	3.37265	0.135805	24.8346	3.79348e-136	7.22279e-134	AAEL023745				GO:0005509,GO:0005515,GO:0005634,GO:0005886,GO:0007219,GO:0007275,GO:0016020,GO:0016021,GO:0030154,GO:0050793	calcium ion binding,protein binding,nucleus,plasma membrane,Notch signaling pathway,multicellular organism development,membrane,integral component of membrane,cell differentiation,regulation of developmental process
LOC5576703	984.948	-3.00853	0.122236	-24.6124	9.30071e-134	1.74899e-131	AAEL011791
LOC5567358	1097.53	-2.376	0.0971028	-24.4689	3.16771e-132	5.88421e-130	AAEL006023	Vanin-like protein 1 precursor, putative [Source:VB Community Annotation]			GO:0006807,GO:0016020,GO:0016021,GO:0016787,GO:0016811	nitrogen compound metabolic process,membrane,integral component of membrane,hydrolase activity,hydrolase activity, acting on carbon-nitrogen (but not peptide) bonds, in linear amides
LOC5564266	2650.85	-2.96437	0.121307	-24.437	6.92311e-132	1.27052e-129	AAEL014365	chromaffin granule amine transporter, putative [Source:VB Community Annotation]			GO:0016020,GO:0016021,GO:0022857,GO:0055085	membrane,integral component of membrane,transmembrane transporter activity,transmembrane transport
LOC5570947	589.654	-3.49098	0.143323	-24.3575	4.83136e-131	8.76087e-129	AAEL008679	Alpha-tubulin N-acetyltransferase [Source:UniProtKB/TrEMBL;Acc:A0A2K7P6B5]			GO:0005874,GO:0016740,GO:0016746,GO:0019799,GO:0048666,GO:0070507,GO:0071929	microtubule,transferase activity,transferase activity, transferring acyl groups,tubulin N-acetyltransferase activity,neuron development,regulation of microtubule cytoskeleton organization,alpha-tubulin acetylation
LOC5580166	4895.85	-2.56416	0.105338	-24.3423	6.99612e-131	1.2537e-128	AAEL002542	Triosephosphate isomerase [Source:UniProtKB/TrEMBL;Acc:Q17HW3]	Tpi		GO:0003824,GO:0004807,GO:0006094,GO:0006096,GO:0016853	catalytic activity,triose-phosphate isomerase activity,gluconeogenesis,glycolytic process,isomerase activity
LOC5564694	1294.57	-3.54282	0.145558	-24.3395	7.4857e-131	1.32584e-128	AAEL026038				GO:0004601,GO:0006979,GO:0020037,GO:0048477,GO:0055114,GO:0098869	peroxidase activity,response to oxidative stress,heme binding,oogenesis,oxidation-reduction process,cellular oxidant detoxification
LOC5565734	3437.48	2.37812	0.0977545	24.3274	1.00499e-130	1.75955e-128	AAEL018040				GO:0000166,GO:0005524,GO:0016020,GO:0016021,GO:0016887,GO:0042626,GO:0055085	nucleotide binding,ATP binding,membrane,integral component of membrane,ATPase activity,ATPase-coupled transmembrane transporter activity,transmembrane transport
LOC5564431	693.56	6.83478	0.282336	24.2079	1.83531e-129	3.17676e-127	AAEL022480
LOC5564560	554.454	-4.27951	0.177468	-24.1142	1.77349e-128	3.03526e-126	AAEL004318
LOC5569724	10989.6	2.11287	0.0877369	24.0819	3.86553e-128	6.5422e-126	AAEL007880	ornithine decarboxylase [Source:VB Community Annotation]			GO:0003824,GO:0006596	catalytic activity,polyamine biosynthetic process
LOC110679049	10990.1	2.11295	0.0877525	24.0785	4.2018e-128	7.03316e-126	AAEL024196
LOC5567701	871.125	-3.17906	0.132434	-24.0048	2.47741e-127	4.10174e-125	AAEL006262	mitochondrial carrier protein [Source:VB Community Annotation]			GO:0016020,GO:0016021	membrane,integral component of membrane
LOC110674025	661.243	4.65489	0.194337	23.9527	8.66101e-127	1.41854e-124	AAEL021538
LOC5573544	3187.65	-2.31159	0.0965196	-23.9495	9.35739e-127	1.5163e-124	AAEL010593
LOC5575331	1145.02	-3.77197	0.15795	-23.8807	4.86146e-126	7.79471e-124	AAEL002586
LOC23687871	5927.52	-4.75593	0.199208	-23.8742	5.67278e-126	9.00081e-124	AAEL017451	Angiotensin-converting enzyme [Source:UniProtKB/TrEMBL;Acc:J9HF68]			GO:0004180,GO:0006508,GO:0008233,GO:0008237,GO:0008241,GO:0016020,GO:0016787,GO:0046872	carboxypeptidase activity,proteolysis,peptidase activity,metallopeptidase activity,peptidyl-dipeptidase activity,membrane,hydrolase activity,metal ion binding
LOC5568482	1611.06	-2.37574	0.0995665	-23.8609	7.81326e-126	1.22692e-123	AAEL006880	Rab32 [Source:UniProtKB/TrEMBL;Acc:A0A1S4FEX4]			GO:0003924,GO:0005525,GO:0005794,GO:0005802,GO:0016020,GO:0016192,GO:0031982	GTPase activity,GTP binding,Golgi apparatus,trans-Golgi network,membrane,vesicle-mediated transport,vesicle
LOC5568353	1525.93	3.99275	0.167479	23.8403	1.27585e-125	1.98303e-123	AAEL001071	glutathione S-transferase (GSTD5) [Source:VB Community Annotation]	GSTD5		GO:0005515	protein binding
LOC5571582	890.259	3.50813	0.147317	23.8135	2.42214e-125	3.72668e-123	AAEL009171				GO:0003700,GO:0006355,GO:0006986	DNA-binding transcription factor activity,regulation of transcription, DNA-templated,response to unfolded protein
LOC5570814	2986.67	-3.1052	0.130663	-23.7649	7.69825e-125	1.1726e-122	AAEL008580				GO:0046872	metal ion binding
LOC110677020	378.943	-4.82838	0.203261	-23.7546	9.83862e-125	1.48378e-122	AAEL021088
LOC5577715	576.55	3.17046	0.133633	23.7251	1.98662e-124	2.96668e-122	AAEL013351	lethal(2)essential for life protein, l2efl [Source:VB Community Annotation]			GO:0046872	metal ion binding
LOC5568649	464.545	4.67652	0.197734	23.6506	1.16449e-123	1.72209e-121	AAEL007018	udp-glucose 4-epimerase [Source:VB Community Annotation]			GO:0003974,GO:0003978,GO:0005975,GO:0006012,GO:0016853	UDP-N-acetylglucosamine 4-epimerase activity,UDP-glucose 4-epimerase activity,carbohydrate metabolic process,galactose metabolic process,isomerase activity
LOC5566478	3109.12	2.20435	0.0934068	23.5995	3.90181e-123	5.71465e-121	AAEL005411	equilibrative nucleoside transporter [Source:VB Community Annotation]			GO:0005337,GO:0016020,GO:0016021,GO:1901642	nucleoside transmembrane transporter activity,membrane,integral component of membrane,nucleoside transmembrane transport
LOC5572005	3112.88	1.84314	0.0781347	23.5893	4.95935e-123	7.19436e-121	AAEL009475	carbamoyl-phosphate synthase large chain [Source:VB Community Annotation]			GO:0000166,GO:0003824,GO:0004070,GO:0004088,GO:0004151,GO:0005524,GO:0006207,GO:0006221,GO:0006520,GO:0006541,GO:0006807,GO:0008152,GO:0016597,GO:0016740,GO:0016743,GO:0016787,GO:0016810,GO:0016812,GO:0016874,GO:0044205,GO:0046872	nucleotide binding,catalytic activity,aspartate carbamoyltransferase activity,carbamoyl-phosphate synthase (glutamine-hydrolyzing) activity,dihydroorotase activity,ATP binding,'de novo' pyrimidine nucleobase biosynthetic process,pyrimidine nucleotide biosynthetic process,cellular amino acid metabolic process,glutamine metabolic process,nitrogen compound metabolic process,metabolic process,amino a…
LOC5572044	690.998	2.88119	0.122403	23.5386	1.64303e-122	2.36101e-120	AAEL000256	Class B Scavenger Receptor (CD36 domain). [Source:VB Community Annotation]	SCRB9		GO:0005886,GO:0016020,GO:0016021	plasma membrane,membrane,integral component of membrane
LOC5567836	2297.17	-2.8724	0.122135	-23.5183	2.64803e-122	3.76961e-120	AAEL001009	dab2-interacting protein [Source:VB Community Annotation]			GO:0005515,GO:0016301,GO:0016310	protein binding,kinase activity,phosphorylation
LOC5568297	2824.48	-3.37577	0.143689	-23.4937	4.73556e-122	6.6789e-120	AAEL006726	Innexin [Source:UniProtKB/TrEMBL;Acc:Q174Z8]	inx4		GO:0005886,GO:0005921,GO:0006811,GO:0016020,GO:0016021,GO:0030054	plasma membrane,gap junction,ion transport,membrane,integral component of membrane,cell junction
LOC23687449	864.436	-2.92813	0.124659	-23.4892	5.26115e-122	7.35209e-120	AAEL017029				GO:0004497,GO:0004505,GO:0005506,GO:0006559,GO:0009072,GO:0016491,GO:0016714,GO:0046872,GO:0055114	monooxygenase activity,phenylalanine 4-monooxygenase activity,iron ion binding,L-phenylalanine catabolic process,aromatic amino acid family metabolic process,oxidoreductase activity,oxidoreductase activity, acting on paired donors, with incorporation or reduction of molecular oxygen, reduced pteridine as one donor, and incorporation of one atom of oxygen,metal ion binding,oxidation-reduction proc…
LOC5573540	490.342	-3.47104	0.148335	-23.4001	4.26712e-121	5.9088e-119	AAEL010591	glutathione transferase [Source:VB Community Annotation]	GSTD6		GO:0005515	protein binding
LOC5579654	517.017	5.33736	0.228704	23.3374	1.84975e-120	2.53832e-118	AAEL003970	amino acid transporter [Source:VB Community Annotation]			GO:0016020,GO:0016021	membrane,integral component of membrane
LOC5576918	372.188	-4.98569	0.213741	-23.3258	2.42576e-120	3.29904e-118	AAEL012863	Predicted acetyltransferase [Source:UniProtKB/TrEMBL;Acc:Q1HR96]			GO:0008080,GO:0016740	N-acetyltransferase activity,transferase activity
LOC5564122	1311.89	-3.27054	0.140241	-23.3208	2.72803e-120	3.67729e-118	AAEL004104				GO:0005515	protein binding
LOC5574077	576.648	-3.93259	0.169538	-23.1959	5.00266e-119	6.68426e-117	AAEL021209				GO:0005515,GO:0010997,GO:0097027,GO:1904668	protein binding,anaphase-promoting complex binding,ubiquitin-protein transferase activator activity,positive regulation of ubiquitin protein ligase activity
LOC5565532	1404.84	-3.18841	0.137612	-23.1695	9.24762e-119	1.22487e-116	AAEL027319				GO:0005515	protein binding
LOC5564126	2298.29	2.39218	0.10334	23.1487	1.49953e-118	1.96903e-116	AAEL004097	enhancer of split protein, putative [Source:VB Community Annotation]			GO:0003677,GO:0005634,GO:0006355,GO:0046983	DNA binding,nucleus,regulation of transcription, DNA-templated,protein dimerization activity
LOC5571580	617.3	3.66457	0.158452	23.1274	2.456e-118	3.19741e-116	AAEL009167	bone morphogenetic protein 5/7, bmp5/7 [Source:VB Community Annotation]			GO:0005576,GO:0007165,GO:0008083	extracellular region,signal transduction,growth factor activity
LOC5564014	487.882	-3.97659	0.172035	-23.115	3.27185e-118	4.22345e-116	AAEL014276				GO:0017053	transcription repressor complex
LOC5570515	559.573	-3.99021	0.172948	-23.0718	8.89586e-118	1.13867e-115	AAEL001423	acid phosphatase-1 [Source:VB Community Annotation]			GO:0003993,GO:0016020,GO:0016021,GO:0016311	acid phosphatase activity,membrane,integral component of membrane,dephosphorylation
LOC5575967	4795.92	-3.85876	0.167484	-23.0396	1.87149e-117	2.37554e-115	AAEL012217	protease m1 zinc metalloprotease [Source:VB Community Annotation]			GO:0004177,GO:0006508,GO:0008233,GO:0008237,GO:0008270,GO:0016787,GO:0046872	aminopeptidase activity,proteolysis,peptidase activity,metallopeptidase activity,zinc ion binding,hydrolase activity,metal ion binding
LOC5571920	908.211	-3.20298	0.139085	-23.029	2.39045e-117	3.0092e-115	AAEL009411	DNA-binding protein smubp-2 [Source:VB Community Annotation]			GO:0003676,GO:0003723,GO:0003724,GO:0004386,GO:0005737,GO:0032574,GO:0035194	nucleic acid binding,RNA binding,RNA helicase activity,helicase activity,cytoplasm,5'-3' RNA helicase activity,post-transcriptional gene silencing by RNA
LOC5573683	23965.9	2.57861	0.112338	22.9541	1.34121e-116	1.67454e-114	AAEL010664	actin binding protein, putative [Source:VB Community Annotation]			GO:0046872	metal ion binding
LOC5565755	10824.8	-2.68095	0.116934	-22.9271	2.49435e-116	3.08893e-114	AAEL004978	DEAD box ATP-dependent RNA helicase [Source:VB Community Annotation]			GO:0000166,GO:0003676,GO:0003724,GO:0004386,GO:0005524,GO:0016787	nucleotide binding,nucleic acid binding,RNA helicase activity,helicase activity,ATP binding,hydrolase activity
LOC5568900	1149.73	2.87346	0.12534	22.9253	2.59947e-116	3.19315e-114	AAEL007206
LOC5577665	734.998	3.82334	0.166899	22.9082	3.8492e-116	4.69048e-114	AAEL019590				GO:0004252,GO:0006508	serine-type endopeptidase activity,proteolysis
LOC110678777	1223.87	-2.43803	0.106454	-22.9022	4.41388e-116	5.33589e-114	AAEL022628
LOC5575223	2150.49	-2.35565	0.102927	-22.8866	6.31802e-116	7.57765e-114	AAEL010608	succinate dehydrogenase [Source:VB Community Annotation]			GO:0005743,GO:0006099,GO:0008177,GO:0016020,GO:0016491,GO:0016627,GO:0022900,GO:0050660,GO:0055114	mitochondrial inner membrane,tricarboxylic acid cycle,succinate dehydrogenase (ubiquinone) activity,membrane,oxidoreductase activity,oxidoreductase activity, acting on the CH-CH group of donors,electron transport chain,flavin adenine dinucleotide binding,oxidation-reduction process
LOC5570576	2144.82	1.8185	0.0795844	22.8499	1.4635e-115	1.74157e-113	AAEL008377
LOC5576142	950.015	-2.6612	0.116884	-22.7679	9.54135e-115	1.12662e-112	AAEL012337	goliath E3 ubiquitin ligase [Source:VB Community Annotation]			GO:0016020,GO:0016021,GO:0046872	membrane,integral component of membrane,metal ion binding
LOC5574835	1744.3	2.68544	0.118263	22.7074	3.78819e-114	4.4386e-112	AAEL011436	myosin xv [Source:VB Community Annotation]			GO:0000166,GO:0003774,GO:0003779,GO:0005515,GO:0005524,GO:0005737,GO:0005856,GO:0007605,GO:0016459	nucleotide binding,motor activity,actin binding,protein binding,ATP binding,cytoplasm,cytoskeleton,sensory perception of sound,myosin complex
LOC110680300	403.153	-4.04217	0.178042	-22.7035	4.14101e-114	4.81495e-112	AAEL026650				GO:0005515	protein binding
LOC5578290	1446.72	-2.35117	0.103574	-22.7004	4.43568e-114	5.11851e-112	AAEL023159				GO:0005246,GO:0005515,GO:0006811,GO:0006816,GO:0016020,GO:0016021,GO:0046872	calcium channel regulator activity,protein binding,ion transport,calcium ion transport,membrane,integral component of membrane,metal ion binding
LOC5567468	1183.36	-2.76006	0.121654	-22.6879	5.90394e-114	6.76157e-112	AAEL000956				GO:0005829,GO:0016020,GO:0035091,GO:0042147	cytosol,membrane,phosphatidylinositol binding,retrograde transport, endosome to Golgi
LOC5566539	684.216	-2.99303	0.13193	-22.6865	6.09203e-114	6.92491e-112	AAEL005473
LOC5575114	1350.38	-1.99427	0.0881803	-22.6158	3.0298e-113	3.41852e-111	AAEL011653	thyroid hormone receptor interactor [Source:VB Community Annotation]			GO:0000166,GO:0005524,GO:0016887,GO:0051321	nucleotide binding,ATP binding,ATPase activity,meiotic cell cycle
LOC5566598	7925.89	-5.01083	0.221628	-22.6092	3.51927e-113	3.94159e-111	AAEL000776				GO:0008270,GO:0046872	zinc ion binding,metal ion binding
LOC5574971	923.949	-2.828	0.125117	-22.6029	4.06109e-113	4.5042e-111	AAEL019422				GO:0000118,GO:0004407,GO:0005634,GO:0006325,GO:0016575,GO:0016787,GO:0032041,GO:0070932	histone deacetylase complex,histone deacetylase activity,nucleus,chromatin organization,histone deacetylation,hydrolase activity,NAD-dependent histone deacetylase activity (H3-K14 specific),histone H3 deacetylation
LOC5568940	4647.9	-2.44576	0.108207	-22.6027	4.08075e-113	4.5042e-111	AAEL007236				GO:0008168,GO:0016740,GO:0032259	methyltransferase activity,transferase activity,methylation
LOC5567287	1944.59	-2.41574	0.10693	-22.5918	5.21711e-113	5.71705e-111	AAEL005951	lipid storage droplets surface binding protein [Source:VB Community Annotation]
LOC5566424	1733.17	-2.83333	0.125495	-22.5773	7.25044e-113	7.88848e-111	AAEL005383	Adenosine monophosphate-protein transferase FICD homolog (EC 2.7.7.n1) [Source:VB Community Annotation]			GO:0000166,GO:0005515,GO:0005524,GO:0016020,GO:0016021,GO:0016740,GO:0016779,GO:0016787,GO:0018117,GO:0070733	nucleotide binding,protein binding,ATP binding,membrane,integral component of membrane,transferase activity,nucleotidyltransferase activity,hydrolase activity,protein adenylylation,protein adenylyltransferase activity
LOC23687419	924.858	-2.68277	0.118965	-22.551	1.3133e-112	1.41873e-110	AAEL016999	white protein; eye pigment transporter [Source:VB Community Annotation]	white		GO:0000166,GO:0005524,GO:0016020,GO:0016021,GO:0016887,GO:0031409,GO:0042626,GO:0055085	nucleotide binding,ATP binding,membrane,integral component of membrane,ATPase activity,pigment binding,ATPase-coupled transmembrane transporter activity,transmembrane transport
LOC5566292	2242.55	-3.50432	0.155548	-22.5288	2.16607e-112	2.3235e-110	AAEL000739				GO:0005515	protein binding
LOC5570054	690.144	-2.8478	0.126617	-22.4914	5.0328e-112	5.36081e-110	AAEL000186				GO:0003839,GO:0016829	gamma-glutamylcyclotransferase activity,lyase activity
LOC5571230	1858.33	-3.39989	0.151293	-22.4722	7.76085e-112	8.20925e-110	AAEL019485				GO:0004721,GO:0005516,GO:0006470,GO:0016787,GO:0033192,GO:0097720	phosphoprotein phosphatase activity,calmodulin binding,protein dephosphorylation,hydrolase activity,calmodulin-dependent protein phosphatase activity,calcineurin-mediated signaling
LOC5569173	429.867	5.76693	0.2572	22.422	2.40367e-111	2.52439e-109	AAEL023026
LOC5566573	720.333	6.79561	0.303082	22.4217	2.41965e-111	2.52439e-109	AAEL005491	ABC transporter [Source:VB Community Annotation]			GO:0000166,GO:0005524,GO:0016020,GO:0016021,GO:0016887,GO:0043190,GO:0055085	nucleotide binding,ATP binding,membrane,integral component of membrane,ATPase activity,ATP-binding cassette (ABC) transporter complex,transmembrane transport
LOC5579040	1756.45	-2.70329	0.120612	-22.4131	2.93511e-111	3.04133e-109	AAEL013974				GO:0001510,GO:0003723,GO:0006396,GO:0008173	RNA methylation,RNA binding,RNA processing,RNA methyltransferase activity
LOC5573177	2996.79	-2.35338	0.105137	-22.3838	5.659e-111	5.82418e-109	AAEL002036
LOC5568275	702.818	-4.13372	0.184682	-22.3829	5.77738e-111	5.90611e-109	AAEL026387				GO:0016747	transferase activity, transferring acyl groups other than amino-acyl groups
LOC5568352	382.324	-4.23758	0.189697	-22.3386	1.55818e-110	1.58228e-108	AAEL001074	cadherin [Source:VB Community Annotation]			GO:0005509,GO:0005886,GO:0007155,GO:0007156,GO:0016020	calcium ion binding,plasma membrane,cell adhesion,homophilic cell adhesion via plasma membrane adhesion molecules,membrane
LOC5564976	919.472	-2.90185	0.130027	-22.3173	2.50866e-110	2.53059e-108	AAEL004532	glyoxylate/hydroxypyruvate reductase [Source:VB Community Annotation]			GO:0016491,GO:0016616,GO:0051287,GO:0055114	oxidoreductase activity,oxidoreductase activity, acting on the CH-OH group of donors, NAD or NADP as acceptor,NAD binding,oxidation-reduction process
LOC5567542	329.466	-4.99861	0.224301	-22.2853	5.12796e-110	5.13876e-108	AAEL006151	serine protease, putative [Source:VB Community Annotation]			GO:0004252,GO:0004553,GO:0005975,GO:0006508,GO:0008061,GO:0008152,GO:0016787,GO:0016798	serine-type endopeptidase activity,hydrolase activity, hydrolyzing O-glycosyl compounds,carbohydrate metabolic process,proteolysis,chitin binding,metabolic process,hydrolase activity,hydrolase activity, acting on glycosyl bonds
LOC5570621	1650.68	-2.64356	0.118716	-22.2679	7.56152e-110	7.52792e-108	AAEL008422				GO:0003676	nucleic acid binding
LOC5568426	774.604	3.89366	0.174937	22.2576	9.5289e-110	9.42494e-108	AAEL006834	glutamate semialdehyde dehydrogenase [Source:VB Community Annotation]			GO:0000166,GO:0003824,GO:0004349,GO:0004350,GO:0005524,GO:0005737,GO:0005739,GO:0006561,GO:0008152,GO:0008652,GO:0016301,GO:0016310,GO:0016491,GO:0016620,GO:0016740,GO:0050661,GO:0055114,GO:0055129	nucleotide binding,catalytic activity,glutamate 5-kinase activity,glutamate-5-semialdehyde dehydrogenase activity,ATP binding,cytoplasm,mitochondrion,proline biosynthetic process,metabolic process,cellular amino acid biosynthetic process,kinase activity,phosphorylation,oxidoreductase activity,oxidoreductase activity, acting on the aldehyde or oxo group of donors, NAD or NADP as acceptor,transfera…
LOC5569810	2141.33	5.33716	0.240137	22.2255	1.94522e-109	1.91159e-107	AAEL001306
LOC5567896	538.073	-3.53186	0.158971	-22.217	2.35171e-109	2.29624e-107	AAEL006354	epoxide hydrolase [Source:VB Community Annotation]			GO:0003824,GO:0016020,GO:0016021	catalytic activity,membrane,integral component of membrane
LOC5570568	763.253	-2.50452	0.112781	-22.207	2.94132e-109	2.85364e-107	AAEL018155				GO:0006857,GO:0016020,GO:0016021,GO:0022857,GO:0055085	oligopeptide transport,membrane,integral component of membrane,transmembrane transporter activity,transmembrane transport
LOC5573003	2710.5	1.99486	0.0898961	22.1907	4.22467e-109	4.07279e-107	AAEL001922
LOC5564380	3441.35	2.7746	0.125192	22.1628	7.8524e-109	7.5225e-107	AAEL014413	cytochrome P450 [Source:VB Community Annotation]	CYP304C1		GO:0004497,GO:0005506,GO:0016020,GO:0016021,GO:0016705,GO:0020037,GO:0055114	monooxygenase activity,iron ion binding,membrane,integral component of membrane,oxidoreductase activity, acting on paired donors, with incorporation or reduction of molecular oxygen,heme binding,oxidation-reduction process
LOC5567275	1669.99	-3.07102	0.138692	-22.1427	1.22604e-108	1.16719e-106	AAEL005938				GO:0003676	nucleic acid binding
LOC5576532	2297.24	-2.99099	0.135398	-22.0903	3.91755e-108	3.70634e-106	AAEL012579	Aspartate aminotransferase [Source:UniProtKB/TrEMBL;Acc:Q16LN3]			GO:0003824,GO:0004069,GO:0006520,GO:0008483,GO:0009058,GO:0016740,GO:0030170	catalytic activity,L-aspartate:2-oxoglutarate aminotransferase activity,cellular amino acid metabolic process,transaminase activity,biosynthetic process,transferase activity,pyridoxal phosphate binding
LOC5573469	441.251	4.05894	0.184489	22.001	2.81621e-107	2.64793e-105	AAEL010513	class b basic helix-loop-helix protein (bhlhb) (differentially expressed in chondrocytes) (mdec) (sharp) [Source:VB Community Annotation]			GO:0003677,GO:0006355,GO:0046983	DNA binding,regulation of transcription, DNA-templated,protein dimerization activity
LOC5563804	848.798	4.24423	0.192964	21.995	3.21792e-107	3.00708e-105	AAEL014136				GO:0016020,GO:0016021	membrane,integral component of membrane
LOC5579146	836.849	2.80911	0.127922	21.9596	7.01141e-107	6.51206e-105	AAEL014022				GO:0005515	protein binding
LOC5568027	583.882	4.3304	0.19738	21.9394	1.09391e-106	1.00984e-104	AAEL024438				GO:0005794,GO:0008376,GO:0016020,GO:0016021,GO:0016740,GO:0032580	Golgi apparatus,acetylgalactosaminyltransferase activity,membrane,integral component of membrane,transferase activity,Golgi cisterna membrane
LOC5569378	1181.07	-3.155	0.143935	-21.9197	1.68667e-106	1.54767e-104	AAEL007563	Dual Oxidase: Peroxidase and NADPH-Oxidase domains. [Source:VB Community Annotation]	DUOX		GO:0004601,GO:0005509,GO:0006979,GO:0016020,GO:0016021,GO:0016174,GO:0016491,GO:0020037,GO:0050665,GO:0055114,GO:0098869	peroxidase activity,calcium ion binding,response to oxidative stress,membrane,integral component of membrane,NAD(P)H oxidase (H(2)O(2)-forming activity,oxidoreductase activity,heme binding,hydrogen peroxide biosynthetic process,oxidation-reduction process,cellular oxidant detoxification
LOC5567373	723.904	3.85397	0.175996	21.898	2.71235e-106	2.47392e-104	AAEL006028				GO:0005319,GO:0006869	lipid transporter activity,lipid transport
LOC5570740	1157.18	4.89206	0.223549	21.8836	3.72285e-106	3.37538e-104	AAEL025518				GO:0005576,GO:0008061	extracellular region,chitin binding
LOC5579849	736.737	-3.76138	0.172262	-21.8352	1.07386e-105	9.67873e-104	AAEL005850	Hormone receptor-like in 4 (nuclear receptor) [Source:VB Community Annotation]	HR4		GO:0003677,GO:0003700,GO:0005634,GO:0006355,GO:0008270,GO:0042025,GO:0043565,GO:0046872	DNA binding,DNA-binding transcription factor activity,nucleus,regulation of transcription, DNA-templated,zinc ion binding,host cell nucleus,sequence-specific DNA binding,metal ion binding
LOC5567324	1567.22	3.10627	0.142397	21.8141	1.70555e-105	1.52818e-103	AAEL019538				GO:0005515,GO:0007275,GO:0016020,GO:0030154,GO:0030215	protein binding,multicellular organism development,membrane,cell differentiation,semaphorin receptor binding
LOC5580315	3367.5	-2.0442	0.0941951	-21.7017	1.97613e-104	1.76026e-102	AAEL012897	aconitase, mitochondrial [Source:VB Community Annotation]			GO:0003994,GO:0005739,GO:0006099,GO:0016829,GO:0046872,GO:0047780,GO:0051536,GO:0051539	aconitate hydratase activity,mitochondrion,tricarboxylic acid cycle,lyase activity,metal ion binding,citrate dehydratase activity,iron-sulfur cluster binding,4 iron, 4 sulfur cluster binding
LOC5567771	994.173	-2.8261	0.130292	-21.6906	2.51934e-104	2.23108e-102	AAEL027575
LOC5574553	772.703	3.95161	0.182315	21.6746	3.5603e-104	3.13471e-102	AAEL011227				GO:0005515	protein binding
LOC23687815	1706.77	-2.12074	0.0979676	-21.6473	6.44027e-104	5.63783e-102	AAEL017395				GO:0016020,GO:0016021,GO:0022857	membrane,integral component of membrane,transmembrane transporter activity
LOC5575317	2712.39	3.48164	0.160878	21.6415	7.31229e-104	6.36461e-102	AAEL002607				GO:0005515	protein binding
LOC5569712	2834.88	-2.51358	0.116266	-21.6191	1.18743e-103	1.02767e-101	AAEL021145
LOC5572120	849.346	-2.48729	0.115149	-21.6006	1.77163e-103	1.5246e-101	AAEL009533				GO:0005515,GO:0005634,GO:0016567	protein binding,nucleus,protein ubiquitination
LOC23687404	5702.88	-2.82589	0.131017	-21.5689	3.5183e-103	3.01072e-101	AAEL016984	Glyceraldehyde-3-phosphate dehydrogenase [Source:UniProtKB/TrEMBL;Acc:J9HYM2]			GO:0000166,GO:0004365,GO:0006006,GO:0006096,GO:0016491,GO:0016620,GO:0050661,GO:0051287,GO:0055114	nucleotide binding,glyceraldehyde-3-phosphate dehydrogenase (NAD+) (phosphorylating) activity,glucose metabolic process,glycolytic process,oxidoreductase activity,oxidoreductase activity, acting on the aldehyde or oxo group of donors, NAD or NADP as acceptor,NADP binding,NAD binding,oxidation-reduction process
LOC5571152	825.654	-2.50297	0.116159	-21.5478	5.55476e-103	4.72682e-101	AAEL008843				GO:0046872	metal ion binding
LOC5568301	3296.4	-2.5688	0.119368	-21.5201	1.0098e-102	8.54518e-101	AAEL006744	Exonuclease nef-sp [Source:UniProtKB/TrEMBL;Acc:A0A1S4FEG0]			GO:0003676	nucleic acid binding
LOC5570810	994.645	3.22646	0.149943	21.5179	1.05948e-102	8.91605e-101	AAEL008574	acyl-CoA oxidase [Source:VB Community Annotation]			GO:0003997,GO:0005777,GO:0006629,GO:0006631,GO:0006635,GO:0016491,GO:0016627,GO:0050660,GO:0055114,GO:0071949	acyl-CoA oxidase activity,peroxisome,lipid metabolic process,fatty acid metabolic process,fatty acid beta-oxidation,oxidoreductase activity,oxidoreductase activity, acting on the CH-CH group of donors,flavin adenine dinucleotide binding,oxidation-reduction process,FAD binding
LOC5565499	923.439	-2.34555	0.109136	-21.4921	1.84693e-102	1.54574e-100	AAEL004805	potassium-dependent sodium-calcium exchanger, putative [Source:VB Community Annotation]			GO:0006816,GO:0015297,GO:0016020,GO:0016021,GO:0055085	calcium ion transport,antiporter activity,membrane,integral component of membrane,transmembrane transport
LOC5576239	2676.5	2.21895	0.103646	21.4089	1.10494e-101	9.19698e-100	AAEL002850	patched 1, [Source:VB Community Annotation]			GO:0016020,GO:0016021	membrane,integral component of membrane
LOC5579032	2671.82	4.42348	0.206922	21.3775	2.16418e-101	1.79157e-99	AAEL013969				GO:0007411,GO:0016020,GO:0016021	axon guidance,membrane,integral component of membrane
LOC5573562	936.379	-2.68166	0.125519	-21.3646	2.85464e-101	2.35037e-99	AAEL002103	histone H1, putative [Source:VB Community Annotation]			GO:0000786,GO:0003677,GO:0005634,GO:0006334,GO:0042025	nucleosome,DNA binding,nucleus,nucleosome assembly,host cell nucleus
LOC5565718	10099.5	1.87079	0.08762	21.3511	3.80654e-101	3.11727e-99	AAEL014959	heterogeneous nuclear ribonucleoprotein k [Source:VB Community Annotation]			GO:0003676,GO:0003723	nucleic acid binding,RNA binding
LOC5577649	2360.62	1.70301	0.0799573	21.299	1.15854e-100	9.43681e-99	AAEL003267
LOC5575412	3415.45	1.70954	0.080347	21.277	1.85542e-100	1.50328e-98	AAEL011815	Poly [ADP-ribose] polymerase [Source:UniProtKB/TrEMBL;Acc:Q16NZ4]			GO:0003677,GO:0003950,GO:0005634,GO:0006471,GO:0008270,GO:0016740,GO:0016757,GO:0046872,GO:0051287	DNA binding,NAD+ ADP-ribosyltransferase activity,nucleus,protein ADP-ribosylation,zinc ion binding,transferase activity,transferase activity, transferring glycosyl groups,metal ion binding,NAD binding
LOC5567255	3849.55	3.8386	0.180507	21.2656	2.36307e-100	1.90446e-98	AAEL005929	ATP-binding cassette transporter [Source:VB Community Annotation]			GO:0000166,GO:0005524,GO:0016020,GO:0016021,GO:0016887,GO:0042626,GO:0055085	nucleotide binding,ATP binding,membrane,integral component of membrane,ATPase activity,ATPase-coupled transmembrane transporter activity,transmembrane transport
LOC5568820	3747.92	2.10586	0.0991238	21.2447	3.68802e-100	2.95663e-98	AAEL001176	s-adenosylmethionine decarboxylase [Source:VB Community Annotation]			GO:0004014,GO:0006557,GO:0006596,GO:0006597,GO:0008295,GO:0016829,GO:0016831	adenosylmethionine decarboxylase activity,S-adenosylmethioninamine biosynthetic process,polyamine biosynthetic process,spermine biosynthetic process,spermidine biosynthetic process,lyase activity,carboxy-lyase activity
LOC5569153	814.134	-3.30962	0.155962	-21.2206	6.15753e-100	4.91055e-98	AAEL020316				GO:0003723,GO:0006396,GO:0008173	RNA binding,RNA processing,RNA methyltransferase activity
LOC5574939	2850.86	-2.2964	0.108562	-21.1529	2.59707e-99	2.06035e-97	AAEL011532
LOC5573039	1047.01	-3.20984	0.151772	-21.1492	2.80818e-99	2.21628e-97	AAEL021387				GO:0005634	nucleus
LOC5575731	3429.38	2.35236	0.111505	21.0964	8.58514e-99	6.74066e-97	AAEL012039	zinc finger protein [Source:VB Community Annotation]			GO:0000977,GO:0003676,GO:0003677,GO:0005634,GO:0006357,GO:0046872	RNA polymerase II transcription regulatory region sequence-specific DNA binding,nucleic acid binding,DNA binding,nucleus,regulation of transcription by RNA polymerase II,metal ion binding
LOC5564563	627.835	3.36082	0.159423	21.0812	1.18338e-98	9.24372e-97	AAEL014510	Sprouty [Source:UniProtKB/TrEMBL;Acc:A0A1S4G215]			GO:0007275,GO:0009966,GO:0016020	multicellular organism development,regulation of signal transduction,membrane
LOC5578729	1544.37	-2.77332	0.131604	-21.0733	1.39856e-98	1.08688e-96	AAEL013844	diazepam binding inhibitor, putative [Source:VB Community Annotation]			GO:0000062	fatty-acyl-CoA binding
LOC5576518	469.588	4.75695	0.225792	21.0679	1.56822e-98	1.21255e-96	AAEL012578	Phosphoserine aminotransferase [Source:UniProtKB/TrEMBL;Acc:Q1HRL1]			GO:0003824,GO:0004648,GO:0006564,GO:0008483,GO:0008652,GO:0016740	catalytic activity,O-phospho-L-serine:2-oxoglutarate aminotransferase activity,L-serine biosynthetic process,transaminase activity,cellular amino acid biosynthetic process,transferase activity
LOC5576154	633.898	-2.72355	0.129293	-21.0649	1.67059e-98	1.28517e-96	AAEL012347				GO:0000049,GO:0003824	tRNA binding,catalytic activity
LOC5566123	3048.63	4.5695	0.216966	21.0609	1.81853e-98	1.39196e-96	AAEL005187	laminin gamma 1 chain [Source:VB Community Annotation]
LOC5569585	546.9	4.81152	0.228677	21.0407	2.78451e-98	2.12068e-96	AAEL001281				GO:0005452,GO:0006811,GO:0006820,GO:0008509,GO:0015698,GO:0016020,GO:0016021,GO:0098656	inorganic anion exchanger activity,ion transport,anion transport,anion transmembrane transporter activity,inorganic anion transport,membrane,integral component of membrane,anion transmembrane transport
LOC5572224	2345.52	-2.57995	0.122633	-21.0379	2.95065e-98	2.23603e-96	AAEL009658	alpha,alpha-trehalase [Source:VB Community Annotation]			GO:0003824,GO:0004555,GO:0005975,GO:0005991,GO:0008152,GO:0016787,GO:0016798	catalytic activity,alpha,alpha-trehalase activity,carbohydrate metabolic process,trehalose metabolic process,metabolic process,hydrolase activity,hydrolase activity, acting on glycosyl bonds
LOC5579951	1011.81	-2.65828	0.126437	-21.0246	3.9077e-98	2.94664e-96	AAEL006786	GTPase_rho [Source:VB Community Annotation]			GO:0003924,GO:0005525,GO:0007264	GTPase activity,GTP binding,small GTPase mediated signal transduction
LOC5571818	2259.84	-2.15244	0.102487	-21.002	6.28237e-98	4.71394e-96	AAEL019836				GO:0003676,GO:0003723,GO:0003729	nucleic acid binding,RNA binding,mRNA binding
LOC5567273	1418.74	-3.50007	0.166725	-20.9931	7.58746e-98	5.6653e-96	AAEL005915	monocarboxylate transporter [Source:VB Community Annotation]			GO:0016020,GO:0016021,GO:0022857,GO:0055085	membrane,integral component of membrane,transmembrane transporter activity,transmembrane transport
LOC5572673	339.767	-3.38506	0.161435	-20.9686	1.27024e-97	9.43821e-96	AAEL009948	aldehyde dehydrogenase [Source:VB Community Annotation]	ALDH9948	ALDH	GO:0016491,GO:0016620,GO:0055114	oxidoreductase activity,oxidoreductase activity, acting on the aldehyde or oxo group of donors, NAD or NADP as acceptor,oxidation-reduction process
LOC5575719	415.696	-6.09059	0.290499	-20.966	1.34065e-97	9.91298e-96	AAEL019587				GO:0007165	signal transduction
LOC23687649	328.792	4.47122	0.213582	20.9344	2.60467e-97	1.91663e-95	AAEL017229				GO:0003676,GO:0006355	nucleic acid binding,regulation of transcription, DNA-templated
LOC5575445	9202.13	-3.54414	0.169306	-20.9333	2.66205e-97	1.94944e-95	AAEL002652
LOC5574223	620.681	-3.33121	0.159693	-20.8601	1.23529e-96	9.00284e-95	AAEL012382				GO:0000166,GO:0009166,GO:0016787,GO:0016788,GO:0046872	nucleotide binding,nucleotide catabolic process,hydrolase activity,hydrolase activity, acting on ester bonds,metal ion binding
LOC5577356	2707.26	2.8261	0.1356	20.8415	1.82129e-96	1.32104e-94	AAEL000417	monocarboxylate transporter [Source:VB Community Annotation]			GO:0016020,GO:0016021,GO:0022857,GO:0055085	membrane,integral component of membrane,transmembrane transporter activity,transmembrane transport
LOC5575633	439.285	-3.80102	0.18247	-20.8309	2.27239e-96	1.64043e-94	AAEL011967	DNA photolyase [Source:VB Community Annotation]	cry2
LOC5564923	619.176	-2.60608	0.125142	-20.825	2.57118e-96	1.84737e-94	AAEL004496	glutamate transporter [Source:VB Community Annotation]			GO:0015293,GO:0016020,GO:0016021,GO:0055085	symporter activity,membrane,integral component of membrane,transmembrane transport
LOC5565802	345.858	-3.85566	0.185211	-20.8177	2.99358e-96	2.14076e-94	AAEL025111				GO:0005515,GO:0005886,GO:0007155,GO:0007399,GO:0007411	protein binding,plasma membrane,cell adhesion,nervous system development,axon guidance
LOC5568417	399.071	4.07173	0.196339	20.7383	1.56387e-95	1.11312e-93	AAEL023131				GO:0003677,GO:0006357,GO:0046983	DNA binding,regulation of transcription by RNA polymerase II,protein dimerization activity
LOC5578718	572.066	4.43403	0.213821	20.7371	1.60397e-95	1.13636e-93	AAEL009742	Homeobox protein abdominal-A homolog [Source:VB Community Annotation]			GO:0000981,GO:0003677,GO:0003700,GO:0005634,GO:0006355,GO:0006357,GO:0007275,GO:0009952,GO:0043565	DNA-binding transcription factor activity, RNA polymerase II-specific,DNA binding,DNA-binding transcription factor activity,nucleus,regulation of transcription, DNA-templated,regulation of transcription by RNA polymerase II,multicellular organism development,anterior/posterior pattern specification,sequence-specific DNA binding
LOC5573470	385.829	4.48853	0.216458	20.7363	1.63159e-95	1.15057e-93	AAEL010511				GO:0006812,GO:0006829,GO:0008324,GO:0016020,GO:0016021,GO:0055085,GO:0098655	cation transport,zinc ion transport,cation transmembrane transporter activity,membrane,integral component of membrane,transmembrane transport,cation transmembrane transport
LOC5565707	702.929	-2.85698	0.137988	-20.7047	3.14478e-95	2.20744e-93	AAEL014949				GO:0016787	hydrolase activity
LOC5573842	1330.39	-2.61809	0.126515	-20.6939	3.93236e-95	2.7476e-93	AAEL021227				GO:0003779,GO:0005856,GO:0017124,GO:0042995	actin binding,cytoskeleton,SH3 domain binding,cell projection
LOC5574266	340.794	-3.51471	0.169857	-20.6922	4.07057e-95	2.83119e-93	AAEL006636	GPCR Leukokinin Family [Source:VB Community Annotation]	GPRLLK1_1		GO:0004930,GO:0004983,GO:0007165,GO:0007186,GO:0007218,GO:0016020,GO:0016021	G protein-coupled receptor activity,neuropeptide Y receptor activity,signal transduction,G protein-coupled receptor signaling pathway,neuropeptide signaling pathway,membrane,integral component of membrane
LOC5577590	623.29	-3.60184	0.17411	-20.6871	4.52665e-95	3.13409e-93	AAEL013288				GO:0005768,GO:0005770,GO:0016020,GO:0016021	endosome,late endosome,membrane,integral component of membrane
LOC5576852	910.633	-2.2298	0.108041	-20.6384	1.24152e-94	8.55694e-93	AAEL012835	85 kda calcium-independent phospholipase A2 (ipla2) [Source:VB Community Annotation]			GO:0005515,GO:0006629,GO:0016042,GO:0016787	protein binding,lipid metabolic process,lipid catabolic process,hydrolase activity
LOC5565195	1557.9	-2.40555	0.1166	-20.6307	1.45488e-94	9.98232e-93	AAEL024179				GO:0005347,GO:0005743,GO:0015867,GO:0016020,GO:0016021,GO:0055085	ATP transmembrane transporter activity,mitochondrial inner membrane,ATP transport,membrane,integral component of membrane,transmembrane transport
LOC5576368	453.653	-2.75796	0.133759	-20.6189	1.85835e-94	1.26934e-92	AAEL014924	Cytochrome P450 [Source:UniProtKB/TrEMBL;Acc:A0A1S4F322]			GO:0004497,GO:0005506,GO:0016020,GO:0016021,GO:0016491,GO:0016705,GO:0020037,GO:0046872,GO:0055114	monooxygenase activity,iron ion binding,membrane,integral component of membrane,oxidoreductase activity,oxidoreductase activity, acting on paired donors, with incorporation or reduction of molecular oxygen,heme binding,metal ion binding,oxidation-reduction process
LOC5572676	986.678	4.51511	0.218989	20.618	1.8936e-94	1.28764e-92	AAEL022179				GO:0000981,GO:0003677,GO:0003700,GO:0005634,GO:0006355,GO:0006357,GO:0007275,GO:0043565	DNA-binding transcription factor activity, RNA polymerase II-specific,DNA binding,DNA-binding transcription factor activity,nucleus,regulation of transcription, DNA-templated,regulation of transcription by RNA polymerase II,multicellular organism development,sequence-specific DNA binding
LOC5572405	333.454	-3.51927	0.171291	-20.5456	8.43282e-94	5.70883e-92	AAEL009787
LOC5566203	2272.85	3.79524	0.184784	20.5388	9.70099e-94	6.53829e-92	AAEL018334				GO:0000166,GO:0005524,GO:0016020,GO:0016021,GO:0016887,GO:0043190,GO:0055085	nucleotide binding,ATP binding,membrane,integral component of membrane,ATPase activity,ATP-binding cassette (ABC) transporter complex,transmembrane transport
LOC5569017	297.301	4.50055	0.219258	20.5263	1.25388e-93	8.4137e-92	AAEL007303				GO:0002039,GO:0018024,GO:0034968	p53 binding,histone-lysine N-methyltransferase activity,histone lysine methylation
LOC110676967	272.401	-4.91234	0.239323	-20.526	1.26195e-93	8.43071e-92	AAEL023813
LOC5577280	1976.58	-1.9378	0.0944932	-20.5073	1.85481e-93	1.23374e-91	AAEL013132	6-phosphofructo-2-kinase/fructose-2,6-bisphosphatase short form [Source:VB Community Annotation]			GO:0003824,GO:0003873,GO:0004331,GO:0005524,GO:0006000,GO:0006003,GO:0008152,GO:0016311,GO:0046835	catalytic activity,6-phosphofructo-2-kinase activity,fructose-2,6-bisphosphate 2-phosphatase activity,ATP binding,fructose metabolic process,fructose 2,6-bisphosphate metabolic process,metabolic process,dephosphorylation,carbohydrate phosphorylation
LOC5567695	3981.76	-2.93392	0.14311	-20.5012	2.09974e-93	1.39057e-91	AAEL006271	copper-zinc (Cu-Zn) superoxide dismutase [Source:VB Community Annotation]	CUSOD2		GO:0004784,GO:0006801,GO:0016209,GO:0016491,GO:0019430,GO:0046872,GO:0055114,GO:0098869	superoxide dismutase activity,superoxide metabolic process,antioxidant activity,oxidoreductase activity,removal of superoxide radicals,metal ion binding,oxidation-reduction process,cellular oxidant detoxification
LOC5565921	5220.18	-2.8097	0.137254	-20.4708	3.91835e-93	2.58374e-91	AAEL000703	glycogen phosphorylase [Source:VB Community Annotation]			GO:0004645,GO:0005975,GO:0005977,GO:0008184,GO:0016740,GO:0016757,GO:0030170,GO:0102250,GO:0102499	1,4-alpha-oligoglucan phosphorylase activity,carbohydrate metabolic process,glycogen metabolic process,glycogen phosphorylase activity,transferase activity,transferase activity, transferring glycosyl groups,pyridoxal phosphate binding,linear malto-oligosaccharide phosphorylase activity,SHG alpha-glucan phosphorylase activity
LOC5568896	2185.17	4.72633	0.231148	20.4472	6.36473e-93	4.17877e-91	AAEL007218				GO:0006629,GO:0016020,GO:0016021,GO:0016491,GO:0055114,GO:0080019,GO:0102965	lipid metabolic process,membrane,integral component of membrane,oxidoreductase activity,oxidation-reduction process,fatty-acyl-CoA reductase (alcohol-forming) activity,alcohol-forming fatty acyl-CoA reductase activity
LOC5580108	799.905	4.9783	0.243511	20.4438	6.8193e-93	4.45801e-91	AAEL010941	Protein tweety homolog [Source:UniProtKB/TrEMBL;Acc:Q16RK1]			GO:0005254,GO:0005886,GO:0006811,GO:0006821,GO:0016020,GO:0016021,GO:0034707,GO:1902476	chloride channel activity,plasma membrane,ion transport,chloride transport,membrane,integral component of membrane,chloride channel complex,chloride transmembrane transport
LOC5579026	870.414	-2.41712	0.118267	-20.4378	7.71999e-93	5.02525e-91	AAEL013965				GO:0046872	metal ion binding
LOC5564875	2379.86	-2.51237	0.122959	-20.4326	8.58304e-93	5.56327e-91	AAEL004462
LOC5571287	461.712	-3.22424	0.158076	-20.3968	1.78696e-92	1.15335e-90	AAEL001559				GO:0000166,GO:0004672,GO:0004674,GO:0005524,GO:0006468	nucleotide binding,protein kinase activity,protein serine/threonine kinase activity,ATP binding,protein phosphorylation
LOC5568238	2749.65	1.86745	0.0916305	20.3803	2.50294e-92	1.60864e-90	AAEL006669	GPCR Frizzled/Smoothened Family [Source:VB Community Annotation]	GPRSMO		GO:0004888,GO:0004930,GO:0005515,GO:0007165,GO:0007166,GO:0007186,GO:0007224,GO:0007275,GO:0016020,GO:0016021	transmembrane signaling receptor activity,G protein-coupled receptor activity,protein binding,signal transduction,cell surface receptor signaling pathway,G protein-coupled receptor signaling pathway,smoothened signaling pathway,multicellular organism development,membrane,integral component of membrane
LOC5578080	718.459	-2.43749	0.12046	-20.2347	4.84103e-91	3.09826e-89	AAEL003435
LOC5570578	3403.39	-1.92176	0.0950275	-20.2232	6.11286e-91	3.89586e-89	AAEL008389	ankyrin repeat-rich membrane-spanning protein [Source:VB Community Annotation]			GO:0005515,GO:0016020,GO:0016021	protein binding,membrane,integral component of membrane
LOC5567014	560.64	3.10199	0.15345	20.215	7.22633e-91	4.58631e-89	AAEL005763	lysosomal alpha-mannosidase (mannosidase alpha class 2b member 1) [Source:VB Community Annotation]			GO:0003824,GO:0004559,GO:0005975,GO:0006013,GO:0008152,GO:0016787,GO:0016798,GO:0030246,GO:0046872	catalytic activity,alpha-mannosidase activity,carbohydrate metabolic process,mannose metabolic process,metabolic process,hydrolase activity,hydrolase activity, acting on glycosyl bonds,carbohydrate binding,metal ion binding
LOC5572940	8944.1	-4.28484	0.211997	-20.2118	7.70591e-91	4.87039e-89	AAEL019583				GO:0003676,GO:0003723,GO:0005515,GO:0007275	nucleic acid binding,RNA binding,protein binding,multicellular organism development
LOC5564551	1970.21	3.07853	0.152481	20.1896	1.20736e-90	7.59937e-89	AAEL004326
LOC5567757	1774.94	3.4596	0.171359	20.1892	1.2189e-90	7.64042e-89	AAEL000126	molybdopterin cofactor synthesis protein a [Source:VB Community Annotation]			GO:0003824,GO:0006777,GO:0046872,GO:0051536,GO:0051539,GO:0061799	catalytic activity,Mo-molybdopterin cofactor biosynthetic process,metal ion binding,iron-sulfur cluster binding,4 iron, 4 sulfur cluster binding,cyclic pyranopterin monophosphate synthase activity
LOC5572509	736.595	-2.30104	0.114048	-20.176	1.59213e-90	9.93906e-89	AAEL009838	glycogen debranching enzyme [Source:VB Community Annotation]			GO:0003824,GO:0004134,GO:0004135,GO:0005737,GO:0005975,GO:0005978,GO:0005980,GO:0008152,GO:0016740,GO:0016757,GO:0016787,GO:0016798,GO:0102500	catalytic activity,4-alpha-glucanotransferase activity,amylo-alpha-1,6-glucosidase activity,cytoplasm,carbohydrate metabolic process,glycogen biosynthetic process,glycogen catabolic process,metabolic process,transferase activity,transferase activity, transferring glycosyl groups,hydrolase activity,hydrolase activity, acting on glycosyl bonds,beta-maltose 4-alpha-glucanotransferase activity
LOC5580164	5233.05	-3.73369	0.185061	-20.1754	1.60992e-90	1.00091e-88	AAEL002557	cationic amino acid transporter [Source:VB Community Annotation]			GO:0016020,GO:0016021,GO:0022857,GO:0055085	membrane,integral component of membrane,transmembrane transporter activity,transmembrane transport
LOC5574496	2647.64	-2.93509	0.145498	-20.1728	1.6992e-90	1.05212e-88	AAEL002399	Aspartate aminotransferase [Source:UniProtKB/TrEMBL;Acc:Q5K6H3]			GO:0003824,GO:0004069,GO:0006520,GO:0008483,GO:0009058,GO:0016740,GO:0030170	catalytic activity,L-aspartate:2-oxoglutarate aminotransferase activity,cellular amino acid metabolic process,transaminase activity,biosynthetic process,transferase activity,pyridoxal phosphate binding
LOC5574200	737.414	-2.91802	0.144801	-20.1519	2.58986e-90	1.59712e-88	AAEL002320				GO:0005634,GO:0008270,GO:0046872	nucleus,zinc ion binding,metal ion binding
LOC5571592	1004.17	4.98283	0.247308	20.1483	2.78539e-90	1.71077e-88	AAEL026147				GO:0005509,GO:0005515,GO:0005576,GO:0007275	calcium ion binding,protein binding,extracellular region,multicellular organism development
LOC5565429	550.79	4.97694	0.247051	20.1454	2.95038e-90	1.80482e-88	AAEL000671	Toll-like receptor (TOLL6) [Source:VB Community Annotation]	TOLL6		GO:0005515,GO:0007165,GO:0016020,GO:0016021	protein binding,signal transduction,membrane,integral component of membrane
LOC5580098	944.946	-2.6299	0.130651	-20.1293	4.09008e-90	2.492e-88	AAEL002142
LOC5579143	355.687	-3.88555	0.193267	-20.1045	6.736e-90	4.08776e-88	AAEL023618				GO:0000166,GO:0004672,GO:0004674,GO:0005524,GO:0006468	nucleotide binding,protein kinase activity,protein serine/threonine kinase activity,ATP binding,protein phosphorylation
LOC5564133	1863.13	-2.07339	0.103145	-20.1017	7.12832e-90	4.30867e-88	AAEL004088	aldo-keto reductase [Source:VB Community Annotation]			GO:0016491,GO:0055114	oxidoreductase activity,oxidation-reduction process
LOC5571111	603.994	3.53912	0.176282	20.0765	1.18479e-89	7.13309e-88	AAEL001513	WD-repeat protein [Source:VB Community Annotation]			GO:0005515	protein binding
LOC5568752	299.277	4.75019	0.236994	20.0435	2.30132e-89	1.38007e-87	AAEL007105				GO:0005515,GO:0051260	protein binding,protein homooligomerization
LOC110679126	410.316	-3.55111	0.177222	-20.0377	2.58633e-89	1.5449e-87	AAEL020300				GO:0005515	protein binding
LOC5564376	4932.25	1.59003	0.0793571	20.0364	2.65517e-89	1.57983e-87	AAEL014408	m-phase inducer phosphatase(cdc25) [Source:VB Community Annotation]			GO:0004721,GO:0004725,GO:0006470,GO:0007049,GO:0016787,GO:0035335,GO:0051301,GO:1902751	phosphoprotein phosphatase activity,protein tyrosine phosphatase activity,protein dephosphorylation,cell cycle,hydrolase activity,peptidyl-tyrosine dephosphorylation,cell division,positive regulation of cell cycle G2/M phase transition
LOC5565539	475.905	-3.22878	0.16125	-20.0235	3.43951e-89	2.03452e-87	AAEL027153
LOC5565953	1066.51	-1.98194	0.0989814	-20.0234	3.44607e-89	2.03452e-87	AAEL005071	GTP binding protein [Source:UniProtKB/TrEMBL;Acc:A0A1S4F9G8]			GO:0000166,GO:0003924,GO:0005525	nucleotide binding,GTPase activity,GTP binding
LOC5564768	6744.4	-2.13205	0.106546	-20.0106	4.45691e-89	2.62115e-87	AAEL004434	transketolase [Source:VB Community Annotation]			GO:0003824,GO:0016740,GO:0046872	catalytic activity,transferase activity,metal ion binding
LOC5571882	1556.56	-2.99316	0.14964	-20.0025	5.2425e-89	3.0713e-87	AAEL012134	pur-alpha [Source:VB Community Annotation]			GO:0000977,GO:0003677,GO:0005634,GO:0032422	RNA polymerase II transcription regulatory region sequence-specific DNA binding,DNA binding,nucleus,purine-rich negative regulatory element binding
LOC5577310	707.828	-2.9491	0.147442	-20.0018	5.30994e-89	3.09889e-87	AAEL019790				GO:0004888,GO:0004930,GO:0005515,GO:0005886,GO:0007165,GO:0007166,GO:0007186,GO:0016020,GO:0016021,GO:0016055,GO:0042813	transmembrane signaling receptor activity,G protein-coupled receptor activity,protein binding,plasma membrane,signal transduction,cell surface receptor signaling pathway,G protein-coupled receptor signaling pathway,membrane,integral component of membrane,Wnt signaling pathway,Wnt-activated receptor activity
LOC5577380	2211.04	-1.91341	0.0958263	-19.9675	1.05665e-88	6.14306e-87	AAEL000415	AMP dependent coa ligase [Source:VB Community Annotation]			GO:0003824	catalytic activity
LOC5571723	1385.02	-2.34161	0.117324	-19.9585	1.26454e-88	7.32373e-87	AAEL020359				GO:0003676,GO:0003723	nucleic acid binding,RNA binding
LOC5577713	337.663	4.91457	0.246449	19.9415	1.77721e-88	1.0254e-86	AAEL013352	lethal(2)essential for life protein, l2efl [Source:VB Community Annotation]			GO:0046872	metal ion binding
LOC5570428	251.455	-4.93641	0.248116	-19.8956	4.44442e-88	2.55462e-86	AAEL008331
LOC5573047	1578.2	4.87332	0.245138	19.88	6.06943e-88	3.47555e-86	AAEL010219	sugar transporter [Source:VB Community Annotation]			GO:0016020,GO:0016021,GO:0022857,GO:0055085	membrane,integral component of membrane,transmembrane transporter activity,transmembrane transport
LOC5563629	1029.06	-3.03631	0.15278	-19.8738	6.86424e-88	3.91596e-86	AAEL027228
LOC5575995	6108.54	1.66173	0.0836589	19.8632	8.47173e-88	4.81498e-86	AAEL002761	tropomyosin invertebrate [Source:VB Community Annotation]
LOC5571852	1516.19	1.75906	0.0885984	19.8543	1.01105e-87	5.72503e-86	AAEL009339	activin receptor type I, putative [Source:VB Community Annotation]			GO:0000166,GO:0004672,GO:0004675,GO:0005524,GO:0006468,GO:0007178,GO:0016020,GO:0016021,GO:0016301,GO:0016310,GO:0016740	nucleotide binding,protein kinase activity,transmembrane receptor protein serine/threonine kinase activity,ATP binding,protein phosphorylation,transmembrane receptor protein serine/threonine kinase signaling pathway,membrane,integral component of membrane,kinase activity,phosphorylation,transferase activity
LOC5570471	905.013	-3.00407	0.151403	-19.8415	1.30422e-87	7.35776e-86	AAEL007189	nocturnin [Source:VB Community Annotation]			GO:0004535,GO:0007623,GO:0090503	poly(A)-specific ribonuclease activity,circadian rhythm,RNA phosphodiester bond hydrolysis, exonucleolytic
LOC110678273	393.72	4.17347	0.21046	19.8302	1.63332e-87	9.18033e-86	AAEL019954				GO:0008271,GO:0008272,GO:0015116,GO:0016020,GO:0016021,GO:0055085	secondary active sulfate transmembrane transporter activity,sulfate transport,sulfate transmembrane transporter activity,membrane,integral component of membrane,transmembrane transport
LOC23687758	1258.14	-2.28739	0.115543	-19.7968	3.17083e-87	1.77566e-85	AAEL017338				GO:0000165,GO:0000166,GO:0000185,GO:0004672,GO:0004674,GO:0005524,GO:0006468,GO:0008349,GO:0016301,GO:0016310,GO:0016740	MAPK cascade,nucleotide binding,activation of MAPKKK activity,protein kinase activity,protein serine/threonine kinase activity,ATP binding,protein phosphorylation,MAP kinase kinase kinase kinase activity,kinase activity,phosphorylation,transferase activity
LOC5574458	1658.15	4.66985	0.235936	19.7929	3.42928e-87	1.91336e-85	AAEL011180
LOC5576245	978.726	3.06972	0.155364	19.7582	6.81658e-87	3.78942e-85	AAEL002848	tubulin beta chain [Source:VB Community Annotation]			GO:0000166,GO:0003924,GO:0005200,GO:0005525,GO:0005737,GO:0005856,GO:0005874,GO:0007010,GO:0007017	nucleotide binding,GTPase activity,structural constituent of cytoskeleton,GTP binding,cytoplasm,cytoskeleton,microtubule,cytoskeleton organization,microtubule-based process
LOC5568851	330.898	3.70137	0.187527	19.7378	1.02149e-86	5.65795e-85	AAEL007164
LOC5572089	543.551	-2.55064	0.12944	-19.7052	1.94697e-86	1.0745e-84	AAEL009500				GO:0003676	nucleic acid binding
LOC5576486	2508.55	2.44754	0.12421	19.7049	1.95571e-86	1.07543e-84	AAEL002913	peroxisomal membrane protein 70 abcd3 [Source:VB Community Annotation]			GO:0000166,GO:0005524,GO:0005777,GO:0015910,GO:0016020,GO:0016021,GO:0016887,GO:0042626,GO:0042803,GO:0055085	nucleotide binding,ATP binding,peroxisome,long-chain fatty acid import into peroxisome,membrane,integral component of membrane,ATPase activity,ATPase-coupled transmembrane transporter activity,protein homodimerization activity,transmembrane transport
LOC5571293	5319.36	-2.55531	0.129849	-19.6792	3.2537e-86	1.78275e-84	AAEL001593	glycerol-3-phosphate dehydrogenase [Source:VB Community Annotation]			GO:0004367,GO:0005975,GO:0006072,GO:0006650,GO:0009331,GO:0016491,GO:0016616,GO:0042803,GO:0046168,GO:0051287,GO:0055114	glycerol-3-phosphate dehydrogenase [NAD+] activity,carbohydrate metabolic process,glycerol-3-phosphate metabolic process,glycerophospholipid metabolic process,glycerol-3-phosphate dehydrogenase complex,oxidoreductase activity,oxidoreductase activity, acting on the CH-OH group of donors, NAD or NADP as acceptor,protein homodimerization activity,glycerol-3-phosphate catabolic process,NAD binding,ox…
LOC5565437	564.103	-3.23012	0.164142	-19.6788	3.2738e-86	1.78733e-84	AAEL000661	t-cell specific transcription factor, tcf [Source:VB Community Annotation]			GO:0003677,GO:0005634,GO:0016055	DNA binding,nucleus,Wnt signaling pathway
LOC5576072	284.499	5.30527	0.269735	19.6684	4.01968e-86	2.18671e-84	AAEL025503				GO:0005886,GO:0016020,GO:0016021,GO:0046983	plasma membrane,membrane,integral component of membrane,protein dimerization activity
LOC110674662	2763.76	-2.47071	0.125646	-19.6641	4.38173e-86	2.37518e-84	AAEL020106
LOC5565179	488.862	-3.09551	0.157782	-19.6188	1.06761e-85	5.76658e-84	AAEL004624
LOC5566175	724.186	2.87393	0.146526	19.6138	1.17816e-85	6.34125e-84	AAEL005237				GO:0016020,GO:0016021	membrane,integral component of membrane
LOC5564933	495.514	3.01382	0.153688	19.61	1.2702e-85	6.81256e-84	AAEL021679				GO:0005515,GO:0005524,GO:0016887,GO:0022008	protein binding,ATP binding,ATPase activity,neurogenesis
LOC110677652	405.522	-3.12543	0.159439	-19.6027	1.46624e-85	7.83639e-84	AAEL024341
LOC5570648	3060.77	2.8385	0.144937	19.5843	2.10313e-85	1.1201e-83	AAEL008468	cysteine synthase [Source:VB Community Annotation]			GO:0004122,GO:0005737,GO:0006535,GO:0008652,GO:0016829,GO:0019343,GO:0019344	cystathionine beta-synthase activity,cytoplasm,cysteine biosynthetic process from serine,cellular amino acid biosynthetic process,lyase activity,cysteine biosynthetic process via cystathionine,cysteine biosynthetic process
LOC5577612	462.41	-2.62588	0.134134	-19.5766	2.44879e-85	1.29965e-83	AAEL026088				GO:0000166,GO:0005524	nucleotide binding,ATP binding
LOC5580029	1482.8	-2.33228	0.119151	-19.5742	2.56822e-85	1.35831e-83	AAEL009654
LOC5567900	560.214	4.03566	0.206503	19.5429	4.74295e-85	2.49982e-83	AAEL006355	Class C Scavenger Receptor (Sushi/SCR/CCP MAM and Somatomedin B domains). [Source:VB Community Annotation]	SCRC1		GO:0016020	membrane
LOC5570305	526.094	-2.63268	0.134732	-19.54	5.01391e-85	2.63351e-83	AAEL008256	cyclin A3, putative [Source:VB Community Annotation]			GO:0005634,GO:0042025	nucleus,host cell nucleus
LOC5573184	326.998	-3.60177	0.184506	-19.5211	7.26368e-85	3.80208e-83	AAEL001976	cAMP-dependent protein kinase catalytic subunit [Source:VB Community Annotation]			GO:0000166,GO:0004672,GO:0004674,GO:0005524,GO:0006468,GO:0016301,GO:0016310,GO:0016740	nucleotide binding,protein kinase activity,protein serine/threonine kinase activity,ATP binding,protein phosphorylation,kinase activity,phosphorylation,transferase activity
LOC5573007	2235.3	3.49084	0.178826	19.5209	7.29402e-85	3.80488e-83	AAEL001925				GO:0003677,GO:0005634,GO:0005737,GO:0006211,GO:0008270,GO:0016491,GO:0046872,GO:0051213,GO:0055114,GO:0070579,GO:0080111	DNA binding,nucleus,cytoplasm,5-methylcytosine catabolic process,zinc ion binding,oxidoreductase activity,metal ion binding,dioxygenase activity,oxidation-reduction process,methylcytosine dioxygenase activity,DNA demethylation
LOC5575161	415.455	-3.38284	0.17351	-19.4965	1.17461e-84	6.10639e-83	AAEL000354	dimeric dihydrodiol dehydrogenase [Source:VB Community Annotation]			GO:0016491,GO:0055114	oxidoreductase activity,oxidation-reduction process
LOC5576642	6157.71	2.15622	0.110711	19.4762	1.74781e-84	9.05531e-83	AAEL012671				GO:0003700,GO:0006355	DNA-binding transcription factor activity,regulation of transcription, DNA-templated
LOC5575396	462.134	3.33574	0.171577	19.4416	3.43226e-84	1.77221e-82	AAEL011801
LOC5568942	330.111	5.5681	0.286847	19.4114	6.18085e-84	3.18063e-82	AAEL007226	nidogen [Source:VB Community Annotation]			GO:0005509,GO:0005604,GO:0007155,GO:0007160,GO:0016020	calcium ion binding,basement membrane,cell adhesion,cell-matrix adhesion,membrane
LOC5569464	373.143	-3.50016	0.18062	-19.3786	1.16949e-83	5.99787e-82	AAEL007661	rab-40 [Source:VB Community Annotation]			GO:0003924,GO:0005525,GO:0035556	GTPase activity,GTP binding,intracellular signal transduction
LOC5567141	448.622	2.79603	0.144408	19.362	1.61468e-83	8.25329e-82	AAEL019742
LOC5575931	3863.99	2.13912	0.11062	19.3375	2.59753e-83	1.32327e-81	AAEL012161				GO:0006081,GO:0016020,GO:0016021,GO:0016491,GO:0016620,GO:0055114	cellular aldehyde metabolic process,membrane,integral component of membrane,oxidoreductase activity,oxidoreductase activity, acting on the aldehyde or oxo group of donors, NAD or NADP as acceptor,oxidation-reduction process
LOC5572409	887.771	4.53366	0.234466	19.3361	2.66743e-83	1.35434e-81	AAEL019468				GO:0004867,GO:0005576,GO:0008233,GO:0010466,GO:0010951,GO:0030414	serine-type endopeptidase inhibitor activity,extracellular region,peptidase activity,negative regulation of peptidase activity,negative regulation of endopeptidase activity,peptidase inhibitor activity
LOC5567637	362.27	-2.68585	0.138926	-19.333	2.83538e-83	1.43484e-81	AAEL006224	short-chain dehydrogenase [Source:VB Community Annotation]			GO:0016491,GO:0055114	oxidoreductase activity,oxidation-reduction process
LOC5568380	1112.54	2.48664	0.128695	19.322	3.50818e-83	1.76942e-81	AAEL019704				GO:0004888,GO:0005515,GO:0007166,GO:0016020,GO:0016021	transmembrane signaling receptor activity,protein binding,cell surface receptor signaling pathway,membrane,integral component of membrane
LOC110674056	299.038	-3.42798	0.177695	-19.2914	6.34904e-83	3.1917e-81	AAEL026343				GO:0000166,GO:0003676,GO:0003779,GO:0003824,GO:0004386,GO:0005524,GO:0006310,GO:0044237	nucleotide binding,nucleic acid binding,actin binding,catalytic activity,helicase activity,ATP binding,DNA recombination,cellular metabolic process
LOC5566360	285.902	-4.41864	0.229064	-19.29	6.51273e-83	3.26322e-81	AAEL023417				GO:0005634	nucleus
LOC5577354	3696.43	-2.36393	0.122555	-19.2887	6.6856e-83	3.33885e-81	AAEL000424	leucine aminopeptidase [Source:VB Community Annotation]			GO:0004177,GO:0004842,GO:0005515,GO:0005737,GO:0006508,GO:0008233,GO:0008235,GO:0016567,GO:0016787,GO:0016874,GO:0019538,GO:0030145,GO:0046872,GO:0061630,GO:0070006	aminopeptidase activity,ubiquitin-protein transferase activity,protein binding,cytoplasm,proteolysis,peptidase activity,metalloexopeptidase activity,protein ubiquitination,hydrolase activity,ligase activity,protein metabolic process,manganese ion binding,metal ion binding,ubiquitin protein ligase activity,metalloaminopeptidase activity
LOC110676106	1137.61	-2.97779	0.154571	-19.2649	1.05943e-82	5.27363e-81	AAEL026111				GO:0003924,GO:0005200,GO:0005525,GO:0005874,GO:0007017	GTPase activity,structural constituent of cytoskeleton,GTP binding,microtubule,microtubule-based process
LOC5571306	1516.21	-1.96288	0.10205	-19.2346	1.9016e-82	9.43489e-81	AAEL008960	Regulator of telomere elongation helicase 1 homolog (EC 3.6.4.12) [Source:VB Community Annotation]			GO:0000166,GO:0000723,GO:0003676,GO:0003677,GO:0003678,GO:0004003,GO:0004386,GO:0005524,GO:0005634,GO:0006139,GO:0006260,GO:0006281,GO:0006310,GO:0006974,GO:0010569,GO:0016787,GO:0016818,GO:0032508,GO:0046872,GO:0051536,GO:0051539	nucleotide binding,telomere maintenance,nucleic acid binding,DNA binding,DNA helicase activity,GO_0004003,helicase activity,ATP binding,nucleus,nucleobase-containing compound metabolic process,DNA replication,DNA repair,DNA recombination,cellular response to DNA damage stimulus,regulation of double-strand break repair via homologous recombination,hydrolase activity,hydrolase activity, acting on a…
LOC5568611	5663.12	2.53316	0.131719	19.2315	2.01614e-82	9.97071e-81	AAEL006976				GO:0005634,GO:0016480	nucleus,negative regulation of transcription by RNA polymerase III
LOC5570220	695.669	3.49624	0.181813	19.2298	2.08279e-82	1.0267e-80	AAEL008151
LOC5563638	309.044	5.89021	0.306433	19.2219	2.42798e-82	1.193e-80	AAEL000021
LOC5573541	657.399	-3.59341	0.187017	-19.2143	2.80773e-82	1.37516e-80	AAEL010583	ubiquitin conjugating enzyme 7 interacting protein [Source:VB Community Annotation]			GO:0046872	metal ion binding
LOC5574198	443.057	-3.02638	0.157575	-19.2059	3.30181e-82	1.61196e-80	AAEL002281				GO:0005634,GO:0008270,GO:0046872	nucleus,zinc ion binding,metal ion binding
LOC5574653	1391.6	-2.72016	0.141803	-19.1827	5.16046e-82	2.51131e-80	AAEL011287	ubiquitin specific protease [Source:VB Community Annotation]			GO:0004843,GO:0006508,GO:0006511,GO:0008233,GO:0016579,GO:0036459	thiol-dependent ubiquitin-specific protease activity,proteolysis,ubiquitin-dependent protein catabolic process,peptidase activity,protein deubiquitination,thiol-dependent ubiquitinyl hydrolase activity
LOC5573185	394.312	-3.47363	0.18109	-19.1818	5.25424e-82	2.54881e-80	AAEL001958				GO:0003676	nucleic acid binding
LOC5579180	1518.21	-2.7078	0.141216	-19.1749	5.99746e-82	2.90011e-80	AAEL003896	serine/threonine protein kinase [Source:VB Community Annotation]			GO:0000166,GO:0004672,GO:0005524,GO:0006468	nucleotide binding,protein kinase activity,ATP binding,protein phosphorylation
LOC5573100	816.904	-2.23682	0.116919	-19.1313	1.38558e-81	6.67885e-80	AAEL010290	Short-chain dehydrogenase [Source:UniProtKB/TrEMBL;Acc:A0A1S4FQ43]			GO:0016020,GO:0016021,GO:0055114	membrane,integral component of membrane,oxidation-reduction process
LOC110680251	285.751	-4.41652	0.230864	-19.1304	1.41042e-81	6.77713e-80	AAEL023417
LOC5575910	794.263	-2.19039	0.114693	-19.0978	2.63526e-81	1.26227e-79	AAEL012154	2,3-cyclic-nucleotide 2-phosphodiesterase [Source:VB Community Annotation]			GO:0000166,GO:0009166,GO:0016787	nucleotide binding,nucleotide catabolic process,hydrolase activity
LOC5567290	14387.4	1.41434	0.0740985	19.0873	3.22036e-81	1.5377e-79	AAEL005947	G-rich sequence factor-1, putative [Source:VB Community Annotation]			GO:0003676,GO:0003723	nucleic acid binding,RNA binding
LOC5568788	1652.47	2.20734	0.115755	19.069	4.57157e-81	2.17607e-79	AAEL007132	dynein heavy chain [Source:VB Community Annotation]			GO:0000166,GO:0003774,GO:0003777,GO:0005524,GO:0005737,GO:0005856,GO:0005874,GO:0007018,GO:0008569,GO:0030286	nucleotide binding,motor activity,microtubule motor activity,ATP binding,cytoplasm,cytoskeleton,microtubule,microtubule-based movement,ATP-dependent microtubule motor activity, minus-end-directed,dynein complex
LOC5570423	1505.73	2.23219	0.117126	19.058	5.63541e-81	2.6741e-79	AAEL008330	hexaprenyldihydroxybenzoate methyltransferase [Source:VB Community Annotation]			GO:0004395,GO:0005739,GO:0005743,GO:0006744,GO:0008168,GO:0008425,GO:0008689,GO:0010420,GO:0016020,GO:0016740,GO:0031314,GO:0032259,GO:0061542,GO:1990886	hexaprenyldihydroxybenzoate methyltransferase activity,mitochondrion,mitochondrial inner membrane,ubiquinone biosynthetic process,methyltransferase activity,2-polyprenyl-6-methoxy-1,4-benzoquinone methyltransferase activity,3-demethylubiquinone-9 3-O-methyltransferase activity,3,4-dihydroxy-5-polyprenylbenzoic acid O-methyltransferase activity,membrane,transferase activity,extrinsic component of …
LOC5564419	416.417	4.46513	0.234305	19.0569	5.75389e-81	2.72184e-79	AAEL019808				GO:0003677,GO:0003700,GO:0005634,GO:0006355	DNA binding,DNA-binding transcription factor activity,nucleus,regulation of transcription, DNA-templated
LOC5572220	285.606	3.87136	0.203569	19.0175	1.22234e-80	5.7643e-79	AAEL009627
LOC5575821	298.543	5.38472	0.283759	18.9764	2.67267e-80	1.25648e-78	AAEL012091				GO:0003677,GO:0005634,GO:0006338	DNA binding,nucleus,chromatin remodeling
LOC5572184	1162.51	-2.87412	0.15149	-18.9724	2.8858e-80	1.35251e-78	AAEL019431	ecdysone receptor [Source:VB Community Annotation]	EcR		GO:0003677,GO:0003700,GO:0003707,GO:0004879,GO:0005634,GO:0006355,GO:0008270,GO:0035076,GO:0035100,GO:0042025,GO:0043565,GO:0046872	DNA binding,DNA-binding transcription factor activity,steroid hormone receptor activity,nuclear receptor activity,nucleus,regulation of transcription, DNA-templated,zinc ion binding,ecdysone receptor-mediated signaling pathway,ecdysone binding,host cell nucleus,sequence-specific DNA binding,metal ion binding
LOC5577684	733.678	-2.5985	0.137211	-18.938	5.54948e-80	2.59293e-78	AAEL019721				GO:0005509	calcium ion binding
LOC110678100	275.279	-4.80479	0.253754	-18.9348	5.88909e-80	2.7432e-78	AAEL020632
LOC5578848	451.455	-2.84544	0.150297	-18.9322	6.19201e-80	2.87551e-78	AAEL014362
LOC5567188	292.352	4.44458	0.234812	18.9283	6.67418e-80	3.09e-78	AAEL000855	mannosyltransferase 1, [Source:VB Community Annotation]			GO:0000030,GO:0004169,GO:0005783,GO:0005789,GO:0006486,GO:0006493,GO:0016020,GO:0016021,GO:0016740,GO:0016757,GO:0035269,GO:0097502	mannosyltransferase activity,dolichyl-phosphate-mannose-protein mannosyltransferase activity,endoplasmic reticulum,endoplasmic reticulum membrane,protein glycosylation,protein O-linked glycosylation,membrane,integral component of membrane,transferase activity,transferase activity, transferring glycosyl groups,protein O-linked mannosylation,mannosylation
LOC5567999	2006.5	-2.07462	0.109637	-18.9227	7.42248e-80	3.42604e-78	AAEL006449	ser/thr protein kinase-lyk4 [Source:VB Community Annotation]			GO:0000166,GO:0004672,GO:0005524,GO:0005634,GO:0005737,GO:0006468,GO:0016740	nucleotide binding,protein kinase activity,ATP binding,nucleus,cytoplasm,protein phosphorylation,transferase activity
LOC5578680	909.565	3.54946	0.187606	18.9197	7.8471e-80	3.61109e-78	AAEL003622	delta(9)-desaturase, putative [Source:VB Community Annotation]			GO:0006629,GO:0006633,GO:0016020,GO:0016021,GO:0016491,GO:0016717,GO:0055114	lipid metabolic process,fatty acid biosynthetic process,membrane,integral component of membrane,oxidoreductase activity,oxidoreductase activity, acting on paired donors, with oxidation of a pair of donors resulting in the reduction of molecular oxygen to two molecules of water,oxidation-reduction process
LOC110679361	790.798	-3.29251	0.174135	-18.9078	9.82993e-80	4.50993e-78	AAEL009498				GO:0003677,GO:0003899,GO:0006351,GO:0032549	DNA binding,DNA-directed 5'-3' RNA polymerase activity,transcription, DNA-templated,ribonucleoside binding
LOC5563945	773.068	-2.08425	0.110258	-18.9034	1.06975e-79	4.89324e-78	AAEL014248				GO:0005886,GO:0005887,GO:0016020,GO:0016021,GO:0032217,GO:0032218	plasma membrane,integral component of plasma membrane,membrane,integral component of membrane,riboflavin transmembrane transporter activity,riboflavin transport
LOC5567482	455.286	-2.53212	0.134232	-18.8638	2.2641e-79	1.03254e-77	AAEL019703				GO:0005515,GO:0016020,GO:0042802	protein binding,membrane,identical protein binding
LOC5576869	543.342	4.1485	0.219922	18.8636	2.27419e-79	1.03405e-77	AAEL019619				GO:0003779,GO:0005737,GO:0005856,GO:0030036	actin binding,cytoplasm,cytoskeleton,actin cytoskeleton organization
LOC5563587	930.615	-1.99513	0.105783	-18.8606	2.40352e-79	1.0896e-77	AAEL000005				GO:0003676,GO:0005634,GO:0008270,GO:0046872	nucleic acid binding,nucleus,zinc ion binding,metal ion binding
LOC5569701	320.44	-3.72788	0.197843	-18.8426	3.37877e-79	1.52717e-77	AAEL007855
LOC5568763	3076.64	3.01407	0.160029	18.8345	3.93589e-79	1.77371e-77	AAEL007121	tartan [Source:VB Community Annotation]			GO:0005515,GO:0016020,GO:0016021	protein binding,membrane,integral component of membrane
LOC5569887	6005.03	2.42735	0.128912	18.8294	4.33285e-79	1.94684e-77	AAEL024147				GO:0006629,GO:0006631,GO:0006633,GO:0016020,GO:0016021,GO:0016740,GO:0030176,GO:0102336,GO:0102337,GO:0102338,GO:0102756	lipid metabolic process,fatty acid metabolic process,fatty acid biosynthetic process,membrane,integral component of membrane,transferase activity,integral component of endoplasmic reticulum membrane,3-oxo-arachidoyl-CoA synthase activity,3-oxo-cerotoyl-CoA synthase activity,3-oxo-lignoceronyl-CoA synthase activity,very-long-chain 3-ketoacyl-CoA synthase activity
LOC5567927	946.924	-3.08923	0.164253	-18.8078	6.52289e-79	2.92225e-77	AAEL006372	sulphate transporter [Source:VB Community Annotation]			GO:0008271,GO:0008272,GO:0015116,GO:0016020,GO:0016021,GO:0055085,GO:1902358	secondary active sulfate transmembrane transporter activity,sulfate transport,sulfate transmembrane transporter activity,membrane,integral component of membrane,transmembrane transport,sulfate transmembrane transport
LOC5564684	10743.5	-1.98697	0.105667	-18.8041	6.98701e-79	3.121e-77	AAEL004386	chorion peroxidase [Source:VB Community Annotation]	pxt	HPX8C	GO:0004601,GO:0005576,GO:0006979,GO:0007306,GO:0016491,GO:0020037,GO:0042743,GO:0042744,GO:0046872,GO:0048477,GO:0055114,GO:0098869	peroxidase activity,extracellular region,response to oxidative stress,eggshell chorion assembly,oxidoreductase activity,heme binding,hydrogen peroxide metabolic process,hydrogen peroxide catabolic process,metal ion binding,oogenesis,oxidation-reduction process,cellular oxidant detoxification
LOC5576665	334.314	-2.77357	0.147611	-18.7898	9.15838e-79	4.07896e-77	AAEL012676				GO:0003676,GO:0006139,GO:0008408,GO:0046872,GO:0090305	nucleic acid binding,nucleobase-containing compound metabolic process,3'-5' exonuclease activity,metal ion binding,nucleic acid phosphodiester bond hydrolysis
LOC5578648	897.329	-2.44287	0.130145	-18.7705	1.31763e-78	5.85135e-77	AAEL013799				GO:0003676	nucleic acid binding
LOC5564259	49473.4	3.89555	0.207839	18.7431	2.20231e-78	9.75164e-77	AAEL022285
LOC5571730	1092.29	-2.05074	0.109467	-18.7339	2.6224e-78	1.15781e-76	AAEL009262
LOC5576219	1714.12	-1.56644	0.0837216	-18.7101	4.09836e-78	1.80423e-76	AAEL002843				GO:0000493,GO:0001522,GO:0003723,GO:0005634,GO:0005732,GO:0006364,GO:0042254	box H/ACA snoRNP assembly,pseudouridine synthesis,RNA binding,nucleus,small nucleolar ribonucleoprotein complex,rRNA processing,ribosome biogenesis
LOC5567533	952.139	-1.9121	0.102237	-18.7026	4.71093e-78	2.06792e-76	AAEL006140	mitosis inhibitor protein kinase [Source:VB Community Annotation]			GO:0000166,GO:0004672,GO:0004674,GO:0005524,GO:0006468,GO:0016020	nucleotide binding,protein kinase activity,protein serine/threonine kinase activity,ATP binding,protein phosphorylation,membrane
LOC5576136	766.444	-2.98028	0.159449	-18.6911	5.84509e-78	2.5584e-76	AAEL024236				GO:0003677,GO:0003700,GO:0006355	DNA binding,DNA-binding transcription factor activity,regulation of transcription, DNA-templated
LOC5579075	1144.89	2.27656	0.121975	18.6642	9.67887e-78	4.22431e-76	AAEL019426				GO:0003677,GO:0003700,GO:0005634,GO:0006355,GO:0042025,GO:0043565	DNA binding,DNA-binding transcription factor activity,nucleus,regulation of transcription, DNA-templated,host cell nucleus,sequence-specific DNA binding
LOC5579190	734.532	3.70645	0.198639	18.6592	1.0632e-77	4.62706e-76	AAEL003899	sugar transporter [Source:VB Community Annotation]			GO:0016020,GO:0016021,GO:0022857,GO:0055085	membrane,integral component of membrane,transmembrane transporter activity,transmembrane transport
LOC110676568	8471.45	-3.3073	0.177454	-18.6375	1.59514e-77	6.92227e-76	AAEL020990
LOC5565057	272.175	5.57402	0.299897	18.5864	4.13991e-77	1.79145e-75	AAEL027515
LOC5578005	348.83	3.11622	0.168012	18.5476	8.52946e-77	3.68047e-75	AAEL018301
LOC5572212	379.293	3.97781	0.21452	18.5428	9.32204e-77	4.01111e-75	AAEL009616	cadherin [Source:VB Community Annotation]			GO:0005509,GO:0005886,GO:0007155,GO:0007156,GO:0016020,GO:0016021,GO:0098609	calcium ion binding,plasma membrane,cell adhesion,homophilic cell adhesion via plasma membrane adhesion molecules,membrane,integral component of membrane,cell-cell adhesion
LOC5573569	499.97	-2.97964	0.160809	-18.529	1.2041e-76	5.16644e-75	AAEL019476				GO:0005085,GO:0005089,GO:0005515	guanyl-nucleotide exchange factor activity,Rho guanyl-nucleotide exchange factor activity,protein binding
LOC5573716	4508.89	-1.51652	0.081853	-18.5273	1.2429e-76	5.31791e-75	AAEL022128
LOC5564044	293.294	4.43692	0.239701	18.5102	1.70926e-76	7.29284e-75	AAEL025520				GO:0005085	guanyl-nucleotide exchange factor activity
LOC5577660	1298.02	-2.34385	0.126791	-18.4859	2.68002e-76	1.14028e-74	AAEL003243	Clip-Domain Serine Protease family B. [Source:VB Community Annotation]	CLIPB13A		GO:0004252,GO:0005576,GO:0006508,GO:0008233,GO:0008236,GO:0016787	serine-type endopeptidase activity,extracellular region,proteolysis,peptidase activity,serine-type peptidase activity,hydrolase activity
LOC5575629	922.668	2.14795	0.116203	18.4844	2.75597e-76	1.16933e-74	AAEL011962
LOC5565483	643.065	-2.81951	0.152625	-18.4734	3.37808e-76	1.4293e-74	AAEL004821	potassium-dependent sodium-calcium exchanger, putative [Source:VB Community Annotation]			GO:0006816,GO:0015297,GO:0016020,GO:0016021,GO:0055085	calcium ion transport,antiporter activity,membrane,integral component of membrane,transmembrane transport
LOC5575836	551.719	-3.01008	0.162964	-18.4708	3.54825e-76	1.49715e-74	AAEL012098	synaptic vesicle protein [Source:VB Community Annotation]			GO:0016020,GO:0016021,GO:0022857,GO:0055085	membrane,integral component of membrane,transmembrane transporter activity,transmembrane transport
LOC5572377	958.213	-2.61885	0.141887	-18.4573	4.55757e-76	1.9177e-74	AAEL009765	choline/ethanolamine kinase [Source:VB Community Annotation]
LOC5564813	1049.7	4.17996	0.226674	18.4404	6.2269e-76	2.6129e-74	AAEL014635	engrailed [Source:VB Community Annotation]			GO:0000981,GO:0003677,GO:0005634,GO:0006355,GO:0006357,GO:0007275,GO:0043565	DNA-binding transcription factor activity, RNA polymerase II-specific,DNA binding,nucleus,regulation of transcription, DNA-templated,regulation of transcription by RNA polymerase II,multicellular organism development,sequence-specific DNA binding
LOC5564176	1334.71	-1.93278	0.104838	-18.4359	6.77341e-76	2.83441e-74	AAEL004125	signal transduction protein lnk-realted [Source:VB Community Annotation]			GO:0007165,GO:0035591	signal transduction,signaling adaptor activity
LOC110675525	900.965	-9.34862	0.507214	-18.4313	7.36588e-76	3.07389e-74	AAEL025435
LOC5567734	1891.61	-2.84562	0.154524	-18.4154	9.88734e-76	4.11486e-74	AAEL024283				GO:0003676,GO:0003677,GO:0005515	nucleic acid binding,DNA binding,protein binding
LOC5572481	388.63	-2.7385	0.148862	-18.3962	1.40918e-75	5.84866e-74	AAEL009811
LOC5569095	353.025	3.50439	0.190667	18.3797	1.91183e-75	7.91332e-74	AAEL007364	7,8-dihydro-8-oxoguanine-triphosphatase, putative [Source:UniProtKB/TrEMBL;Acc:Q172L0]			GO:0016787	hydrolase activity
LOC5567565	4017.47	2.85958	0.155594	18.3785	1.95457e-75	8.06828e-74	AAEL006169	Lysosomal aspartic protease Precursor (EC 3.4.23.-) [Source:VB Community Annotation]			GO:0004190,GO:0005764,GO:0006508,GO:0008233,GO:0016787	aspartic-type endopeptidase activity,lysosome,proteolysis,peptidase activity,hydrolase activity
LOC110679302	1454.81	4.82933	0.263033	18.3601	2.7396e-75	1.12783e-73	AAEL027514				GO:0008083	growth factor activity
LOC5568915	1553.74	3.60799	0.196557	18.356	2.95834e-75	1.2146e-73	AAEL007205	gata-binding factor-c (transcription factor gata-c) [Source:VB Community Annotation]			GO:0003700,GO:0005634,GO:0006355,GO:0006357,GO:0008270,GO:0043565,GO:0046872	DNA-binding transcription factor activity,nucleus,regulation of transcription, DNA-templated,regulation of transcription by RNA polymerase II,zinc ion binding,sequence-specific DNA binding,metal ion binding
LOC5576303	601.307	-2.0673	0.112653	-18.351	3.2407e-75	1.32694e-73	AAEL012453
LOC5565767	4786.83	-2.02041	0.110134	-18.345	3.61619e-75	1.47672e-73	AAEL004976
LOC5566404	467.493	-2.28787	0.124784	-18.3346	4.38573e-75	1.78619e-73	AAEL015151	acid phosphatase [Source:VB Community Annotation]
LOC110680777	9923.03	-3.31689	0.180964	-18.329	4.85742e-75	1.97302e-73	AAEL024387	Putative serine protease [Source:UniProtKB/TrEMBL;Acc:A0A0P6ITL8]			GO:0006508,GO:0008233	proteolysis,peptidase activity
LOC5571884	3692.79	-2.75258	0.15027	-18.3175	5.99744e-75	2.4296e-73	AAEL009362	cationic amino acid transporter [Source:VB Community Annotation]			GO:0016020,GO:0016021,GO:0022857,GO:0055085	membrane,integral component of membrane,transmembrane transporter activity,transmembrane transport
LOC5578674	277.009	3.78871	0.206872	18.3142	6.37203e-75	2.5745e-73	AAEL003617	alcohol dehydrogenase [Source:VB Community Annotation]			GO:0005737,GO:0006693,GO:0016491,GO:0032440,GO:0036132,GO:0047522,GO:0055114	cytoplasm,prostaglandin metabolic process,oxidoreductase activity,2-alkenal reductase [NAD(P)+] activity,13-prostaglandin reductase activity,15-oxoprostaglandin 13-oxidase activity,oxidation-reduction process
LOC5575834	332.954	4.29888	0.234813	18.3077	7.18992e-75	2.89727e-73	AAEL012104				GO:0005515	protein binding
LOC5566787	931.288	-2.26748	0.123868	-18.3056	7.46562e-75	3.00043e-73	AAEL019539				GO:0016020,GO:0016021,GO:0016409,GO:0016740,GO:0016746,GO:0019706	membrane,integral component of membrane,palmitoyltransferase activity,transferase activity,transferase activity, transferring acyl groups,protein-cysteine S-palmitoyltransferase activity
LOC110679326	272.308	-4.00473	0.218792	-18.3039	7.70991e-75	3.09046e-73	AAEL025296
LOC5574619	517.977	-3.17674	0.173733	-18.2852	1.08582e-74	4.341e-73	AAEL008693	Cation efflux protein/ zinc transporter [Source:UniProtKB/TrEMBL;Acc:A0A1S4FKH5]			GO:0006812,GO:0006829,GO:0008324,GO:0016020,GO:0016021,GO:0055085,GO:0098655	cation transport,zinc ion transport,cation transmembrane transporter activity,membrane,integral component of membrane,transmembrane transport,cation transmembrane transport
LOC5577024	2042.1	-2.78489	0.152486	-18.2633	1.62223e-74	6.46853e-73	AAEL025729				GO:0003779,GO:0004721,GO:0004725,GO:0006470,GO:0008138,GO:0016311,GO:0016787,GO:0016791,GO:0030837,GO:0035335	actin binding,phosphoprotein phosphatase activity,protein tyrosine phosphatase activity,protein dephosphorylation,protein tyrosine/serine/threonine phosphatase activity,dephosphorylation,hydrolase activity,phosphatase activity,negative regulation of actin filament polymerization,peptidyl-tyrosine dephosphorylation
LOC5573350	523.059	-3.17112	0.174102	-18.2141	3.98964e-74	1.58669e-72	AAEL010444
LOC110681048	305.16	-2.97743	0.163536	-18.2066	4.5736e-74	1.81419e-72	AAEL021847				GO:0004497,GO:0005506,GO:0009072,GO:0016714,GO:0055114	monooxygenase activity,iron ion binding,aromatic amino acid family metabolic process,oxidoreductase activity, acting on paired donors, with incorporation or reduction of molecular oxygen, reduced pteridine as one donor, and incorporation of one atom of oxygen,oxidation-reduction process
LOC23687709	580.14	-2.31978	0.127439	-18.203	4.88665e-74	1.93334e-72	AAEL017289				GO:0003676	nucleic acid binding
LOC5579923	2455.63	2.78185	0.152941	18.189	6.30307e-74	2.48726e-72	AAEL006808
LOC5572071	6208.49	1.48505	0.0816616	18.1854	6.74192e-74	2.65356e-72	AAEL001715	chaperonin [Source:VB Community Annotation]			GO:0000166,GO:0005524,GO:0005737,GO:0006457,GO:0051082	nucleotide binding,ATP binding,cytoplasm,protein folding,unfolded protein binding
LOC5569637	657.753	3.84568	0.211544	18.1791	7.55331e-74	2.96526e-72	AAEL007778	leucine-rich transmembrane protein [Source:VB Community Annotation]			GO:0005515,GO:0016020,GO:0016021	protein binding,membrane,integral component of membrane
LOC5566832	582.267	-2.30867	0.127013	-18.1766	7.90862e-74	3.09676e-72	AAEL005665	Serine Protease Inhibitor (serpin) likely cleavage at T/I. [Source:VB Community Annotation]	SRPN3		GO:0004867,GO:0005615,GO:0010466,GO:0010951,GO:0030414	serine-type endopeptidase inhibitor activity,extracellular space,negative regulation of peptidase activity,negative regulation of endopeptidase activity,peptidase inhibitor activity
LOC5572001	430.315	-4.43335	0.243983	-18.1707	8.80125e-74	3.43745e-72	AAEL020201
LOC5573038	1574.47	2.94386	0.162049	18.1665	9.50257e-74	3.70187e-72	AAEL025993				GO:0000166,GO:0003824,GO:0005737,GO:0016491,GO:0016627,GO:0017113,GO:0019483,GO:0046872,GO:0051536,GO:0051539,GO:0055114	nucleotide binding,catalytic activity,cytoplasm,oxidoreductase activity,oxidoreductase activity, acting on the CH-CH group of donors,dihydropyrimidine dehydrogenase (NADP+) activity,beta-alanine biosynthetic process,metal ion binding,iron-sulfur cluster binding,4 iron, 4 sulfur cluster binding,oxidation-reduction process
LOC5567770	443.502	-2.66855	0.146897	-18.1662	9.56681e-74	3.71739e-72	AAEL000111	nitrilase, putative [Source:VB Community Annotation]			GO:0006807	nitrogen compound metabolic process
LOC5577062	479.306	3.23442	0.178223	18.1482	1.32788e-73	5.14663e-72	AAEL026027				GO:0004857,GO:0004867,GO:0005576,GO:0010466,GO:0010951,GO:0030414,GO:0043086	enzyme inhibitor activity,serine-type endopeptidase inhibitor activity,extracellular region,negative regulation of peptidase activity,negative regulation of endopeptidase activity,peptidase inhibitor activity,negative regulation of catalytic activity
LOC5563777	904.348	2.88688	0.159555	18.0933	3.59689e-73	1.39056e-71	AAEL019599				GO:0004672,GO:0005524,GO:0006468,GO:0016020,GO:0016021	protein kinase activity,ATP binding,protein phosphorylation,membrane,integral component of membrane
LOC5569869	850.665	-2.71775	0.150474	-18.0613	6.42687e-73	2.47833e-71	AAEL007971	tyrosine transporter [Source:VB Community Annotation]			GO:0016020,GO:0016021,GO:0055085	membrane,integral component of membrane,transmembrane transport
LOC5564396	1593.79	1.52321	0.0843638	18.0552	7.17443e-73	2.75962e-71	AAEL004244				GO:0000166,GO:0003774,GO:0003777,GO:0005524,GO:0007018,GO:0008017	nucleotide binding,motor activity,microtubule motor activity,ATP binding,microtubule-based movement,microtubule binding
LOC5567743	892.271	-2.22375	0.123221	-18.0468	8.36331e-73	3.20881e-71	AAEL021429				GO:0003779,GO:0005737,GO:0005856,GO:0005886,GO:0015031,GO:0016020,GO:0016192,GO:0030659,GO:0045010	actin binding,cytoplasm,cytoskeleton,plasma membrane,protein transport,membrane,vesicle-mediated transport,cytoplasmic vesicle membrane,actin nucleation
LOC5576483	1242.16	-2.469	0.137026	-18.0186	1.3932e-72	5.33195e-71	AAEL002898				GO:0006729,GO:0008124,GO:0016829	tetrahydrobiopterin biosynthetic process,4-alpha-hydroxytetrahydrobiopterin dehydratase activity,lyase activity
LOC5576176	697.213	-1.89884	0.105386	-18.0179	1.40974e-72	5.38174e-71	AAEL012378	serine-type protease inhibitor [Source:VB Community Annotation]			GO:0005515	protein binding
LOC110678949	13638.2	1.70697	0.0947926	18.0074	1.70562e-72	6.49499e-71	AAEL022104	Ribosomal protein L3 [Source:UniProtKB/TrEMBL;Acc:Q1HR77]			GO:0003735,GO:0005840,GO:0006412	structural constituent of ribosome,ribosome,translation
LOC5570676	699.969	3.89348	0.216372	17.9944	2.15738e-72	8.19481e-71	AAEL008472	glycerol kinase [Source:VB Community Annotation]			GO:0005975,GO:0016773	carbohydrate metabolic process,phosphotransferase activity, alcohol group as acceptor
LOC5570701	382.497	3.20475	0.178111	17.993	2.20865e-72	8.3687e-71	AAEL001459	deltex [Source:VB Community Annotation]			GO:0007219,GO:0008270,GO:0016567,GO:0016740,GO:0046872	Notch signaling pathway,zinc ion binding,protein ubiquitination,transferase activity,metal ion binding
LOC5579888	518.293	4.3752	0.243474	17.9699	3.35458e-72	1.26792e-70	AAEL001046	phosphatase fragment [Source:VB Community Annotation]			GO:0004725,GO:0006470,GO:0016311,GO:0016791,GO:0035335	protein tyrosine phosphatase activity,protein dephosphorylation,dephosphorylation,phosphatase activity,peptidyl-tyrosine dephosphorylation
LOC5573646	675.434	-3.14032	0.174908	-17.9541	4.45639e-72	1.68019e-70	AAEL023212				GO:0000786,GO:0003677,GO:0006334,GO:0042025	nucleosome,DNA binding,nucleosome assembly,host cell nucleus
LOC5577626	703.474	-2.1028	0.117162	-17.9478	4.99584e-72	1.87893e-70	AAEL003210	tetraspanin 29fa [Source:VB Community Annotation]			GO:0016020,GO:0016021	membrane,integral component of membrane
LOC5570737	943.032	-2.68853	0.149808	-17.9465	5.11128e-72	1.91761e-70	AAEL008510	sphingosine kinase a, b [Source:VB Community Annotation]			GO:0003951,GO:0016301,GO:0016310	NAD+ kinase activity,kinase activity,phosphorylation
LOC5578000	1071.26	2.38717	0.133195	17.9224	7.88593e-72	2.95131e-70	AAEL003374	Suppressor of fused homolog [Source:UniProtKB/TrEMBL;Acc:Q17FL2]			GO:0005515,GO:0005634,GO:0005737,GO:0008134	protein binding,nucleus,cytoplasm,transcription factor binding
LOC5577231	4269.1	2.904	0.162045	17.921	8.09281e-72	3.02131e-70	AAEL003128				GO:0005515,GO:0006886	protein binding,intracellular protein transport
LOC110676200	243.585	-3.47197	0.193801	-17.9151	8.98369e-72	3.34571e-70	AAEL024240
LOC5564548	330.74	-2.82809	0.157896	-17.9111	9.65989e-72	3.58877e-70	AAEL004316
LOC5576584	3210.03	2.80619	0.156935	17.8812	1.65326e-71	6.1271e-70	AAEL027399				GO:0016020,GO:0016021	membrane,integral component of membrane
LOC5578788	3193.13	-1.7768	0.09943	-17.8699	2.02521e-71	7.48739e-70	AAEL015682	Histone H2B [Source:UniProtKB/TrEMBL;Acc:Q17ER2]			GO:0000786,GO:0003677,GO:0005634,GO:0005694,GO:0046982	nucleosome,DNA binding,nucleus,chromosome,protein heterodimerization activity
LOC5571026	472.993	-2.10753	0.118125	-17.8416	3.35887e-71	1.2388e-69	AAEL008758	F-box/SPRY domain-containing protein 1 [Source:VB Community Annotation]			GO:0005515,GO:0007274,GO:0007399,GO:0016567,GO:0030054,GO:0031594,GO:0045202,GO:0045886	protein binding,neuromuscular synaptic transmission,nervous system development,protein ubiquitination,cell junction,neuromuscular junction,synapse,negative regulation of synaptic growth at neuromuscular junction
LOC5564938	949.681	-1.77144	0.0995526	-17.794	7.86936e-71	2.89531e-69	AAEL004485	sodium/hydrogen exchanger 5, 6, 8 (nhe5, nhe6, nhe8) [Source:VB Community Annotation]	NHE8		GO:0006811,GO:0006812,GO:0006814,GO:0006885,GO:0015297,GO:0015299,GO:0015385,GO:0016020,GO:0016021,GO:0035725,GO:0055085,GO:1902600	ion transport,cation transport,sodium ion transport,regulation of pH,antiporter activity,solute:proton antiporter activity,sodium:proton antiporter activity,membrane,integral component of membrane,sodium ion transmembrane transport,transmembrane transport,proton transmembrane transport
LOC5572713	392.432	-2.75281	0.154729	-17.7912	8.2708e-71	3.03568e-69	AAEL023488				GO:0005515	protein binding
LOC5570921	3910.33	-1.86444	0.104886	-17.7758	1.08783e-70	3.98314e-69	AAEL001495				GO:0016020,GO:0016021	membrane,integral component of membrane
LOC5575680	520.4	-2.32193	0.130842	-17.746	1.85123e-70	6.76209e-69	AAEL018230				GO:0008146,GO:0016020,GO:0016021	sulfotransferase activity,membrane,integral component of membrane
LOC5571896	1493.42	-2.08334	0.117441	-17.7395	2.07626e-70	7.56592e-69	AAEL009372				GO:0017178,GO:0017183	diphthine-ammonia ligase activity,peptidyl-diphthamide biosynthetic process from peptidyl-histidine
LOC5576729	893.468	-2.92989	0.165268	-17.7282	2.54117e-70	9.23798e-69	AAEL002950
LOC5567205	348.887	-3.20419	0.181161	-17.687	5.28157e-70	1.91545e-68	AAEL000889	Carboxylic ester hydrolase [Source:UniProtKB/TrEMBL;Acc:A0A1S4EX56]			GO:0016787,GO:0052689	hydrolase activity,carboxylic ester hydrolase activity
LOC5575944	492.325	-2.94506	0.166544	-17.6833	5.63468e-70	2.03866e-68	AAEL025814				GO:0005515	protein binding
LOC5578703	480.982	-2.44586	0.13834	-17.6801	5.96896e-70	2.15448e-68	AAEL013822				GO:0006281,GO:0032508,GO:0043138,GO:0043140	DNA repair,DNA duplex unwinding,3'-5' DNA helicase activity,GO_0043140
LOC5578384	4301.66	-2.41766	0.136827	-17.6695	7.20697e-70	2.59519e-68	AAEL018263
LOC5570230	1369.36	-2.49248	0.141157	-17.6575	8.90972e-70	3.20077e-68	AAEL008152	short-chain dehydrogenase [Source:VB Community Annotation]			GO:0016491,GO:0055114	oxidoreductase activity,oxidation-reduction process
LOC5569007	598.723	2.87555	0.162854	17.6572	8.95948e-70	3.21108e-68	AAEL007296	Fatty acyl-CoA reductase [Source:UniProtKB/TrEMBL;Acc:Q172R4]			GO:0006629,GO:0016020,GO:0016021,GO:0016491,GO:0055114,GO:0080019,GO:0102965	lipid metabolic process,membrane,integral component of membrane,oxidoreductase activity,oxidation-reduction process,fatty-acyl-CoA reductase (alcohol-forming) activity,alcohol-forming fatty acyl-CoA reductase activity
LOC5575013	622.619	-1.95996	0.111071	-17.646	1.09234e-69	3.90574e-68	AAEL019769				GO:0035368	selenocysteine insertion sequence binding
LOC5569028	566.26	3.15402	0.178845	17.6355	1.31535e-69	4.69212e-68	AAEL007316				GO:0046872	metal ion binding
LOC5575142	538.895	-2.07327	0.11762	-17.6268	1.53303e-69	5.45587e-68	AAEL020382	Acetyl-coenzyme A synthetase [Source:UniProtKB/TrEMBL;Acc:Q16EU8]			GO:0000166,GO:0003824,GO:0003987,GO:0005524,GO:0016208,GO:0016874,GO:0019427	nucleotide binding,catalytic activity,acetate-CoA ligase activity,ATP binding,AMP binding,ligase activity,acetyl-CoA biosynthetic process from acetate
LOC5579964	833.617	2.51453	0.142834	17.6045	2.27553e-69	8.07945e-68	AAEL007595				GO:0000976,GO:0003677,GO:0003700,GO:0005634,GO:0006355,GO:0006915,GO:0044212,GO:0046872	transcription regulatory region sequence-specific DNA binding,DNA binding,DNA-binding transcription factor activity,nucleus,regulation of transcription, DNA-templated,apoptotic process,GO_0044212,metal ion binding
LOC5568689	364.288	-2.8964	0.164621	-17.5943	2.72463e-69	9.65151e-68	AAEL007053
LOC5564179	3893.14	1.5185	0.0863169	17.5922	2.82873e-69	9.98523e-68	AAEL004141	phosphatidylinositol transfer protein/retinal degeneration b protein [Source:VB Community Annotation]			GO:0005548,GO:0015914	phospholipid transporter activity,phospholipid transport
LOC110678669	247.614	5.02502	0.285641	17.5921	2.83194e-69	9.98523e-68	AAEL020256
LOC5567220	385.322	-3.246	0.18498	-17.5479	6.17649e-69	2.17276e-67	AAEL000898				GO:0016787,GO:0052689	hydrolase activity,carboxylic ester hydrolase activity
LOC5563689	637.684	4.06346	0.231647	17.5416	6.89379e-69	2.4195e-67	AAEL000551				GO:0004866,GO:0004867,GO:0005576,GO:0010466,GO:0010951,GO:0030414	endopeptidase inhibitor activity,serine-type endopeptidase inhibitor activity,extracellular region,negative regulation of peptidase activity,negative regulation of endopeptidase activity,peptidase inhibitor activity
LOC5571231	240.079	-3.50237	0.199799	-17.5295	8.52977e-69	2.98679e-67	AAEL008932	inward-rectifying potassium channel [Source:VB Community Annotation]	Kir1	Irk1	GO:0005242,GO:0005244,GO:0006811,GO:0006813,GO:0016020,GO:0016021,GO:0034220,GO:0034765,GO:0071805	inward rectifier potassium channel activity,voltage-gated ion channel activity,ion transport,potassium ion transport,membrane,integral component of membrane,ion transmembrane transport,regulation of ion transmembrane transport,potassium ion transmembrane transport
LOC5577784	737.342	3.25473	0.185866	17.5112	1.17741e-68	4.11337e-67	AAEL013374	disconnected protein [Source:VB Community Annotation]			GO:0003676,GO:0005634,GO:0046872	nucleic acid binding,nucleus,metal ion binding
LOC5578333	967.381	3.49796	0.199892	17.4993	1.45094e-68	5.05738e-67	AAEL003532				GO:0007275,GO:0009966,GO:0016020	multicellular organism development,regulation of signal transduction,membrane
LOC5572100	2186.78	-2.48577	0.142069	-17.497	1.51112e-68	5.25511e-67	AAEL028105
LOC5576867	749.821	-2.11619	0.120971	-17.4934	1.60951e-68	5.58452e-67	AAEL019672				GO:0003677,GO:0003700,GO:0005634,GO:0006355,GO:0007275,GO:0043565	DNA binding,DNA-binding transcription factor activity,nucleus,regulation of transcription, DNA-templated,multicellular organism development,sequence-specific DNA binding
LOC5576192	765.072	3.40041	0.194466	17.4859	1.83531e-68	6.35352e-67	AAEL012395	ATP-binding cassette transporter [Source:VB Community Annotation]			GO:0000166,GO:0005524,GO:0016020,GO:0016021,GO:0016887,GO:0042626,GO:0055085	nucleotide binding,ATP binding,membrane,integral component of membrane,ATPase activity,ATPase-coupled transmembrane transporter activity,transmembrane transport
LOC5570506	992.427	2.1572	0.123521	17.4643	2.68036e-68	9.25788e-67	AAEL001407	cdk4/6 [Source:VB Community Annotation]			GO:0000166,GO:0004672,GO:0004674,GO:0005524,GO:0006468	nucleotide binding,protein kinase activity,protein serine/threonine kinase activity,ATP binding,protein phosphorylation
LOC5567037	5183.32	2.46027	0.140884	17.4631	2.73864e-68	9.43776e-67	AAEL005790	malic enzyme [Source:VB Community Annotation]			GO:0004470,GO:0004471,GO:0016491,GO:0046872,GO:0051287,GO:0055114	malic enzyme activity,malate dehydrogenase (decarboxylating) (NAD+) activity,oxidoreductase activity,metal ion binding,NAD binding,oxidation-reduction process
LOC5568470	1256.74	-1.8791	0.107652	-17.4553	3.13687e-68	1.07857e-66	AAEL006892
LOC5565836	680.084	4.21193	0.241353	17.4513	3.36331e-68	1.15383e-66	AAEL005017
LOC5575138	623.244	-2.60229	0.149284	-17.4318	4.73306e-68	1.62009e-66	AAEL000327	Ecdysone-induced protein 78C Nuclear receptor [Source:VB Community Annotation]	E78		GO:0003677,GO:0003700,GO:0003707,GO:0004879,GO:0005634,GO:0006355,GO:0008270,GO:0030522,GO:0042025,GO:0043565,GO:0046872	DNA binding,DNA-binding transcription factor activity,steroid hormone receptor activity,nuclear receptor activity,nucleus,regulation of transcription, DNA-templated,zinc ion binding,intracellular receptor signaling pathway,host cell nucleus,sequence-specific DNA binding,metal ion binding
LOC5576319	1477.8	3.53349	0.202738	17.4289	4.97922e-68	1.70053e-66	AAEL000405	odd Oz protein [Source:VB Community Annotation]			GO:0005886,GO:0016020	plasma membrane,membrane
LOC5569030	420.738	2.68733	0.154236	17.4235	5.4703e-68	1.86406e-66	AAEL007317				GO:0001736,GO:0005737,GO:0016192,GO:0060271	establishment of planar polarity,cytoplasm,vesicle-mediated transport,cilium assembly
LOC5565275	776.207	-1.88273	0.108092	-17.4179	6.03012e-68	2.05024e-66	AAEL026452
LOC5578857	4936.51	3.18668	0.182957	17.4176	6.06448e-68	2.05733e-66	AAEL027402				GO:0005515	protein binding
LOC5574784	249.225	3.50898	0.20158	17.4074	7.25185e-68	2.45467e-66	AAEL011421	multiple inositol polyphosphate phosphatase [Source:VB Community Annotation]			GO:0004446,GO:0016311,GO:0016791,GO:0034417,GO:0052826	inositol-hexakisphosphate phosphatase activity,dephosphorylation,phosphatase activity,bisphosphoglycerate 3-phosphatase activity,inositol hexakisphosphate 2-phosphatase activity
LOC5570700	701.729	2.6044	0.149624	17.4063	7.39315e-68	2.49695e-66	AAEL020264				GO:0005515,GO:0016020,GO:0016021	protein binding,membrane,integral component of membrane
LOC5577808	799.699	-2.24991	0.129416	-17.3851	1.06925e-67	3.60327e-66	AAEL013394				GO:0004140,GO:0005524,GO:0015937,GO:0016020,GO:0016021,GO:0016310	dephospho-CoA kinase activity,ATP binding,coenzyme A biosynthetic process,membrane,integral component of membrane,phosphorylation
LOC5572069	525.793	-3.275	0.188414	-17.382	1.13027e-67	3.80052e-66	AAEL027566				GO:0000166,GO:0004672,GO:0004674,GO:0004675,GO:0005524,GO:0006468,GO:0007178,GO:0016020,GO:0016021,GO:0016301,GO:0016310,GO:0016740,GO:0046872	nucleotide binding,protein kinase activity,protein serine/threonine kinase activity,transmembrane receptor protein serine/threonine kinase activity,ATP binding,protein phosphorylation,transmembrane receptor protein serine/threonine kinase signaling pathway,membrane,integral component of membrane,kinase activity,phosphorylation,transferase activity,metal ion binding
LOC5577314	513.326	-2.81718	0.162174	-17.3713	1.36002e-67	4.56296e-66	AAEL025990				GO:0003677,GO:0005634,GO:0046872	DNA binding,nucleus,metal ion binding
LOC5569604	2563.59	1.96241	0.113021	17.3632	1.56644e-67	5.24397e-66	AAEL001275	ef-hand protein nucb1 [Source:VB Community Annotation]			GO:0005509	calcium ion binding
LOC5569214	445.011	2.9243	0.168444	17.3607	1.63656e-67	5.46667e-66	AAEL007473	cytochrome P450 [Source:VB Community Annotation]	CYP6AH1		GO:0004497,GO:0005506,GO:0005789,GO:0016020,GO:0016491,GO:0016705,GO:0020037,GO:0031090,GO:0046872,GO:0055114	monooxygenase activity,iron ion binding,endoplasmic reticulum membrane,membrane,oxidoreductase activity,oxidoreductase activity, acting on paired donors, with incorporation or reduction of molecular oxygen,heme binding,organelle membrane,metal ion binding,oxidation-reduction process
LOC5567349	979.947	-2.48514	0.143241	-17.3494	1.99257e-67	6.64133e-66	AAEL006032				GO:0003677,GO:0005634,GO:0005737,GO:0008270,GO:0046872	DNA binding,nucleus,cytoplasm,zinc ion binding,metal ion binding
LOC110675408	2247.41	1.5776	0.0909404	17.3476	2.05601e-67	6.83779e-66	AAEL025591				GO:0000166,GO:0005524,GO:0005737,GO:0017112,GO:0055037	nucleotide binding,ATP binding,cytoplasm,Rab guanyl-nucleotide exchange factor activity,recycling endosome
LOC5576845	1801.09	-2.04228	0.117735	-17.3463	2.10193e-67	6.9753e-66	AAEL019694				GO:0005515	protein binding
LOC5577897	377.472	5.08814	0.293345	17.3452	2.14344e-67	7.09759e-66	AAEL003345	argininosuccinate lyase [Source:VB Community Annotation]			GO:0003824,GO:0004056,GO:0042450	catalytic activity,argininosuccinate lyase activity,arginine biosynthetic process via ornithine
LOC5569488	1149.96	3.74565	0.216004	17.3406	2.32142e-67	7.67026e-66	AAEL007670	tiptop [Source:VB Community Annotation]			GO:0000122,GO:0003676,GO:0003677,GO:0005634,GO:0010468,GO:0046872,GO:0048730,GO:0048749	negative regulation of transcription by RNA polymerase II,nucleic acid binding,DNA binding,nucleus,regulation of gene expression,metal ion binding,epidermis morphogenesis,compound eye development
LOC5571223	325.532	-3.30415	0.19058	-17.3373	2.45932e-67	8.1083e-66	AAEL008916				GO:0005267,GO:0006811,GO:0006813,GO:0016020,GO:0016021,GO:0071805	potassium channel activity,ion transport,potassium ion transport,membrane,integral component of membrane,potassium ion transmembrane transport
LOC5566445	1085.2	-1.92987	0.111348	-17.332	2.70012e-67	8.883e-66	AAEL005395
LOC5570053	961.229	-2.61821	0.151092	-17.3286	2.86231e-67	9.39626e-66	AAEL000204
LOC5567477	291.954	4.10679	0.236997	17.3285	2.86893e-67	9.39776e-66	AAEL000933				GO:0016020,GO:0016021	membrane,integral component of membrane
LOC5569230	676.684	-1.90522	0.109966	-17.3255	3.01942e-67	9.8695e-66	AAEL007480	Glutamate-cysteine ligase, regulatory-subunit, putative [Source:UniProtKB/TrEMBL;Acc:A0A1S4FGN5]			GO:0005515,GO:0016020,GO:0016021,GO:0016874	protein binding,membrane,integral component of membrane,ligase activity
LOC5566416	598.578	-2.6102	0.150696	-17.3209	3.26956e-67	1.06642e-65	AAEL025718				GO:0006807,GO:0016787,GO:0016811	nitrogen compound metabolic process,hydrolase activity,hydrolase activity, acting on carbon-nitrogen (but not peptide) bonds, in linear amides
LOC5568287	856.899	-2.52057	0.145584	-17.3135	3.72118e-67	1.21113e-65	AAEL006720				GO:0005634	nucleus
LOC5575822	849.811	3.86124	0.223164	17.3022	4.52502e-67	1.46962e-65	AAEL012092	leucine-rich repeat [Source:VB Community Annotation]			GO:0005515,GO:0016020,GO:0016021	protein binding,membrane,integral component of membrane
LOC110681172	439.294	-2.79486	0.161581	-17.297	4.95714e-67	1.60653e-65	AAEL021453				GO:0000139,GO:0005794,GO:0006486,GO:0016020,GO:0016021,GO:0016757	Golgi membrane,Golgi apparatus,protein glycosylation,membrane,integral component of membrane,transferase activity, transferring glycosyl groups
LOC5578845	590.138	2.18515	0.126496	17.2746	7.31394e-67	2.36531e-65	AAEL003739	M-type 9 protein, putative [Source:VB Community Annotation]			GO:0003774,GO:0016459	motor activity,myosin complex
LOC5565449	417.29	3.64469	0.211044	17.2698	7.94476e-67	2.56387e-65	AAEL000642	alpha-amylase [Source:VB Community Annotation]			GO:0003824,GO:0005975,GO:0008152,GO:0016798	catalytic activity,carbohydrate metabolic process,metabolic process,hydrolase activity, acting on glycosyl bonds
LOC5573211	37730.8	1.31209	0.0760072	17.2627	8.98224e-67	2.89255e-65	AAEL010318	Polyadenylate-binding protein [Source:UniProtKB/TrEMBL;Acc:Q1HR66]			GO:0003676,GO:0003723,GO:0005737	nucleic acid binding,RNA binding,cytoplasm
LOC5573780	1510.16	3.51806	0.20421	17.2276	1.64788e-66	5.29548e-65	AAEL000288				GO:0007165,GO:0008083	signal transduction,growth factor activity
LOC5568694	3133.52	-3.46443	0.201141	-17.2239	1.75838e-66	5.63868e-65	AAEL007046	mitochondrial brown fat uncoupling protein [Source:VB Community Annotation]			GO:0016020,GO:0016021,GO:0022857	membrane,integral component of membrane,transmembrane transporter activity
LOC5575180	6252.16	-2.77154	0.16092	-17.2231	1.78275e-66	5.70478e-65	AAEL000335	lamin [Source:VB Community Annotation]			GO:0005198,GO:0005882	structural molecule activity,intermediate filament
LOC5575707	1549.89	-2.78557	0.161825	-17.2135	2.10508e-66	6.72215e-65	AAEL012015	DEAD box ATP-dependent RNA helicase [Source:VB Community Annotation]			GO:0000166,GO:0003676,GO:0003724,GO:0004386,GO:0005524,GO:0016787	nucleotide binding,nucleic acid binding,RNA helicase activity,helicase activity,ATP binding,hydrolase activity
LOC5575816	185.794	-4.30995	0.250484	-17.2065	2.37346e-66	7.56329e-65	AAEL027091				GO:0016021,GO:0035461,GO:0051180,GO:0090482	integral component of membrane,vitamin transmembrane transport,vitamin transport,vitamin transmembrane transporter activity
LOC5578225	1113.39	-2.71739	0.157983	-17.2005	2.63248e-66	8.37117e-65	AAEL013565				GO:0005262,GO:0005739,GO:0005743,GO:0006811,GO:0006816,GO:0015292,GO:0016020,GO:0016021,GO:0051560,GO:0070588	calcium channel activity,mitochondrion,mitochondrial inner membrane,ion transport,calcium ion transport,uniporter activity,membrane,integral component of membrane,mitochondrial calcium ion homeostasis,calcium ion transmembrane transport
LOC5575684	564.708	-1.98796	0.115596	-17.1974	2.77512e-66	8.80637e-65	AAEL011995				GO:0005623,GO:0016020,GO:0016021,GO:0045454	obsolete cell,membrane,integral component of membrane,cell redox homeostasis
LOC5570299	381.678	4.46706	0.260065	17.1767	3.9653e-66	1.25571e-64	AAEL008227	short-chain dehydrogenase [Source:VB Community Annotation]			GO:0016020,GO:0016021,GO:0055114	membrane,integral component of membrane,oxidation-reduction process
LOC5568679	599.432	-2.85956	0.166556	-17.1687	4.55236e-66	1.43862e-64	AAEL007034
LOC5568318	2446.32	1.65972	0.0966951	17.1645	4.8994e-66	1.54509e-64	AAEL006740
LOC5573208	307.06	3.1429	0.183132	17.162	5.11592e-66	1.61004e-64	AAEL010308
LOC5577342	4005.64	-2.09748	0.122383	-17.1386	7.64283e-66	2.40032e-64	AAEL000469				GO:0008270,GO:0016567,GO:0046872,GO:0061630	zinc ion binding,protein ubiquitination,metal ion binding,ubiquitin protein ligase activity
LOC5577984	6817	-1.4844	0.0866276	-17.1354	8.08549e-66	2.53412e-64	AAEL013458	glutamine synthetase 1, 2 (glutamate-amonia ligase) (gs) [Source:VB Community Annotation]			GO:0000166,GO:0003824,GO:0004356,GO:0005524,GO:0006542,GO:0006807,GO:0016874	nucleotide binding,catalytic activity,glutamate-ammonia ligase activity,ATP binding,glutamine biosynthetic process,nitrogen compound metabolic process,ligase activity
LOC5579828	705.591	4.12587	0.240812	17.1331	8.40334e-66	2.62833e-64	AAEL019688				GO:0003824,GO:0004497,GO:0004500,GO:0005507,GO:0016715,GO:0046872,GO:0055114	catalytic activity,monooxygenase activity,dopamine beta-monooxygenase activity,copper ion binding,oxidoreductase activity, acting on paired donors, with incorporation or reduction of molecular oxygen, reduced ascorbate as one donor, and incorporation of one atom of oxygen,metal ion binding,oxidation-reduction process
LOC5564119	742.299	-3.04152	0.177716	-17.1145	1.15684e-65	3.61087e-64	AAEL019770				GO:0003677,GO:0003700,GO:0005634,GO:0006355	DNA binding,DNA-binding transcription factor activity,nucleus,regulation of transcription, DNA-templated
LOC5570108	21132.4	1.40735	0.0822318	17.1144	1.15951e-65	3.61178e-64	AAEL020238				GO:0000028,GO:0003735,GO:0005737,GO:0005840,GO:0006412,GO:0015935,GO:0022627	ribosomal small subunit assembly,structural constituent of ribosome,cytoplasm,ribosome,translation,small ribosomal subunit,cytosolic small ribosomal subunit
LOC5579527	375.17	3.63969	0.213086	17.0808	2.06247e-65	6.41135e-64	AAEL014226				GO:0016020,GO:0016021	membrane,integral component of membrane
LOC5575495	28639	-1.97315	0.115603	-17.0684	2.55169e-65	7.91595e-64	AAEL011870	rap55 [Source:VB Community Annotation]			GO:0006397	mRNA processing
LOC5569746	3008.28	-2.25266	0.132059	-17.058	3.04744e-65	9.43469e-64	AAEL007875				GO:0005515	protein binding
LOC5577893	4923.64	1.88752	0.110719	17.0479	3.62471e-65	1.11991e-63	AAEL013407	Catalase [Source:UniProtKB/TrEMBL;Acc:Q16J86]	Cat	CAT1B	GO:0004096,GO:0004601,GO:0006979,GO:0016491,GO:0020037,GO:0042744,GO:0046872,GO:0055114,GO:0098869	catalase activity,peroxidase activity,response to oxidative stress,oxidoreductase activity,heme binding,hydrogen peroxide catabolic process,metal ion binding,oxidation-reduction process,cellular oxidant detoxification
LOC5568051	3803.67	2.79841	0.164341	17.0281	5.08699e-65	1.56852e-63	AAEL006492	centrin, putative [Source:VB Community Annotation]			GO:0005509	calcium ion binding
LOC5574607	496.508	2.81146	0.16511	17.0278	5.11214e-65	1.57309e-63	AAEL002412	monocarboxylate transporter [Source:VB Community Annotation]			GO:0016020,GO:0016021,GO:0022857,GO:0055085	membrane,integral component of membrane,transmembrane transporter activity,transmembrane transport
LOC5568472	943.99	-1.99693	0.117438	-17.0041	7.65851e-65	2.35191e-63	AAEL006895	phosphofructokinase [Source:VB Community Annotation]			GO:0000166,GO:0003824,GO:0003872,GO:0005524,GO:0005737,GO:0006002,GO:0006096,GO:0008152,GO:0016301,GO:0016310,GO:0016740,GO:0046872,GO:0061615	nucleotide binding,catalytic activity,6-phosphofructokinase activity,ATP binding,cytoplasm,fructose 6-phosphate metabolic process,glycolytic process,metabolic process,kinase activity,phosphorylation,transferase activity,metal ion binding,glycolytic process through fructose-6-phosphate
LOC5571232	491.963	-2.7593	0.162279	-17.0034	7.74994e-65	2.37519e-63	AAEL024784				GO:0004252,GO:0006508	serine-type endopeptidase activity,proteolysis
LOC5565476	1228.82	-2.31101	0.136019	-16.9903	9.68446e-65	2.96212e-63	AAEL004799				GO:0003676	nucleic acid binding
LOC5571448	708.146	-2.27319	0.134145	-16.9458	2.0686e-64	6.31441e-63	AAEL009077	Alkaline phosphatase [Source:UniProtKB/TrEMBL;Acc:A0A0P6JST2]	ALP1		GO:0003824,GO:0004035,GO:0016311,GO:0016787,GO:0016791,GO:0031225	catalytic activity,alkaline phosphatase activity,dephosphorylation,hydrolase activity,phosphatase activity,anchored component of membrane
LOC5577468	724.239	-2.11321	0.124716	-16.9441	2.127e-64	6.4797e-63	AAEL013204				GO:0005515,GO:0008270,GO:0046872	protein binding,zinc ion binding,metal ion binding
LOC5572929	1515.91	2.59178	0.153048	16.9344	2.50754e-64	7.62373e-63	AAEL010148	sodium/potassium-dependent ATPase beta-2 subunit [Source:VB Community Annotation]			GO:0005886,GO:0005890,GO:0006813,GO:0006814,GO:0016020,GO:0016021	plasma membrane,sodium:potassium-exchanging ATPase complex,potassium ion transport,sodium ion transport,membrane,integral component of membrane
LOC5576933	1714.59	-2.16415	0.127832	-16.9296	2.7208e-64	8.25562e-63	AAEL012876				GO:0046872	metal ion binding
LOC5572681	7074.22	4.41922	0.261056	16.9282	2.78704e-64	8.43981e-63	AAEL009955				GO:0005319,GO:0006869	lipid transporter activity,lipid transport
LOC5571189	1160.53	-1.66531	0.0983882	-16.9259	2.89672e-64	8.75452e-63	AAEL008878	diacylglycerol o-acyltransferase [Source:VB Community Annotation]			GO:0005783,GO:0005789,GO:0016020,GO:0016021,GO:0016740,GO:0016746,GO:0016747	endoplasmic reticulum,endoplasmic reticulum membrane,membrane,integral component of membrane,transferase activity,transferase activity, transferring acyl groups,transferase activity, transferring acyl groups other than amino-acyl groups
LOC5574224	894.067	4.24859	0.25109	16.9206	3.17215e-64	9.56797e-63	AAEL018207	C-Type lectin (CTL) [Source:VB Community Annotation]	CTL8
LOC110681088	673.871	2.18633	0.129298	16.9093	3.84283e-64	1.1568e-62	AAEL021891
LOC5569083	835.368	2.91391	0.172515	16.8907	5.26405e-64	1.5815e-62	AAEL001209	sodium-dependent phosphate transporter [Source:VB Community Annotation]			GO:0016020,GO:0016021,GO:0022857,GO:0055085	membrane,integral component of membrane,transmembrane transporter activity,transmembrane transport
LOC5577462	1066.79	-2.88726	0.171078	-16.8768	6.66577e-64	1.99868e-62	AAEL013211				GO:0000166,GO:0004371,GO:0005524,GO:0006071,GO:0016301,GO:0016310,GO:0016740,GO:0034012	nucleotide binding,glycerone kinase activity,ATP binding,glycerol metabolic process,kinase activity,phosphorylation,transferase activity,FAD-AMP lyase (cyclizing) activity
LOC5577589	445.896	-2.90232	0.171995	-16.8745	6.93309e-64	2.07475e-62	AAEL013300				GO:0005768,GO:0005770,GO:0016020,GO:0016021	endosome,late endosome,membrane,integral component of membrane
LOC5569442	749.992	-2.57155	0.152504	-16.8622	8.53171e-64	2.54814e-62	AAEL022844				GO:0006812,GO:0006829,GO:0008324,GO:0016020,GO:0016021,GO:0055085,GO:0098655	cation transport,zinc ion transport,cation transmembrane transporter activity,membrane,integral component of membrane,transmembrane transport,cation transmembrane transport
LOC5564473	291.167	-2.79441	0.165849	-16.8491	1.06486e-63	3.17416e-62	AAEL014451				GO:0016020,GO:0016021	membrane,integral component of membrane
LOC5574026	265.115	-2.8306	0.168188	-16.8299	1.47258e-63	4.38093e-62	AAEL010867	serine protease [Source:VB Community Annotation]			GO:0004252,GO:0006508,GO:0008233,GO:0008236,GO:0016787	serine-type endopeptidase activity,proteolysis,peptidase activity,serine-type peptidase activity,hydrolase activity
LOC5570221	333.179	4.01675	0.238684	16.8287	1.5036e-63	4.4645e-62	AAEL008165
LOC5564884	1339.1	-2.06308	0.122624	-16.8244	1.61753e-63	4.79343e-62	AAEL004474	non-receptor serine/threonine protein kinase [Source:VB Community Annotation]			GO:0000166,GO:0000287,GO:0004672,GO:0004674,GO:0005524,GO:0006468,GO:0016301,GO:0016310,GO:0016740,GO:0035556	nucleotide binding,magnesium ion binding,protein kinase activity,protein serine/threonine kinase activity,ATP binding,protein phosphorylation,kinase activity,phosphorylation,transferase activity,intracellular signal transduction
LOC5564392	2934.22	-2.07546	0.123373	-16.8227	1.66449e-63	4.92301e-62	AAEL004234				GO:0005783,GO:0005789,GO:0016020,GO:0016021,GO:0043231,GO:0046872,GO:0051537	endoplasmic reticulum,endoplasmic reticulum membrane,membrane,integral component of membrane,intracellular membrane-bounded organelle,metal ion binding,2 iron, 2 sulfur cluster binding
LOC5576802	724.648	-2.11695	0.126021	-16.7984	2.50829e-63	7.4043e-62	AAEL018249				GO:0004177,GO:0006508,GO:0008233,GO:0008237,GO:0008270,GO:0016787,GO:0046872	aminopeptidase activity,proteolysis,peptidase activity,metallopeptidase activity,zinc ion binding,hydrolase activity,metal ion binding
LOC5574178	1281.96	1.95739	0.116603	16.7868	3.0507e-63	8.98806e-62	AAEL019806				GO:0016020,GO:0016021	membrane,integral component of membrane
LOC5577490	6375.87	3.36508	0.200476	16.7854	3.11891e-63	9.17129e-62	AAEL013233	PIWI [Source:VB Community Annotation]	PIWI5		GO:0003676,GO:0005515,GO:0031047	nucleic acid binding,protein binding,gene silencing by RNA
LOC5579204	575.24	4.01696	0.2394	16.7793	3.45878e-63	1.01511e-61	AAEL014044				GO:0004888,GO:0005887,GO:0016020,GO:0016021,GO:0030195	transmembrane signaling receptor activity,integral component of plasma membrane,membrane,integral component of membrane,negative regulation of blood coagulation
LOC5572102	282.056	-2.90675	0.173251	-16.7777	3.55282e-63	1.0407e-61	AAEL009515				GO:0003677,GO:0042025	DNA binding,host cell nucleus
LOC5564702	506.777	-2.24236	0.133726	-16.7683	4.16335e-63	1.2172e-61	AAEL020642				GO:0000139,GO:0005737,GO:0005794,GO:0016020,GO:0016021	Golgi membrane,cytoplasm,Golgi apparatus,membrane,integral component of membrane
LOC5569428	507.999	-3.00206	0.179046	-16.7669	4.25885e-63	1.24274e-61	AAEL007632	myosin light chain kinase [Source:VB Community Annotation]			GO:0000166,GO:0004672,GO:0004674,GO:0005524,GO:0006468	nucleotide binding,protein kinase activity,protein serine/threonine kinase activity,ATP binding,protein phosphorylation
LOC5578608	2775.32	-1.79422	0.107024	-16.7648	4.41838e-63	1.28682e-61	AAEL027860	caspar [Source:VB Community Annotation]	casp		GO:0005515	protein binding
LOC5570558	3135.75	-2.73709	0.163423	-16.7485	5.80577e-63	1.68766e-61	AAEL008364	Serine Protease Inhibitor (serpin) likely cleavage at S/S. [Source:VB Community Annotation]	SRPN9		GO:0004867,GO:0005615,GO:0010466,GO:0010951,GO:0030414	serine-type endopeptidase inhibitor activity,extracellular space,negative regulation of peptidase activity,negative regulation of endopeptidase activity,peptidase inhibitor activity
LOC5564934	429.619	-2.31938	0.138549	-16.7404	6.65036e-63	1.92949e-61	AAEL022219
LOC5574493	1299	-3.34452	0.199905	-16.7306	7.84718e-63	2.2724e-61	AAEL002406				GO:0016020,GO:0016021,GO:0055114	membrane,integral component of membrane,oxidation-reduction process
LOC5577909	2401.71	-2.88324	0.172373	-16.7268	8.36001e-63	2.41631e-61	AAEL003355				GO:0003676	nucleic acid binding
LOC5580160	4673.3	3.33691	0.199831	16.6986	1.34066e-62	3.8676e-61	AAEL011397				GO:0016020,GO:0016021	membrane,integral component of membrane
LOC5577224	1411.81	1.60581	0.0962146	16.6899	1.55357e-62	4.47335e-61	AAEL003147				GO:0003676,GO:0005634,GO:0008270,GO:0046872	nucleic acid binding,nucleus,zinc ion binding,metal ion binding
LOC5570999	2404.7	1.34521	0.0806142	16.687	1.63021e-62	4.68517e-61	AAEL008741	importin (ran-binding protein) [Source:VB Community Annotation]			GO:0005515,GO:0005634,GO:0006886,GO:0008536	protein binding,nucleus,intracellular protein transport,Ran GTPase binding
LOC5575604	1079.92	2.18392	0.130889	16.6853	1.67782e-62	4.81291e-61	AAEL011934	glutathione transferase [Source:VB Community Annotation]	GSTZ1		GO:0003824,GO:0005515,GO:0005737,GO:0006559,GO:0006572,GO:0009072,GO:0016034,GO:0016853	catalytic activity,protein binding,cytoplasm,L-phenylalanine catabolic process,tyrosine catabolic process,aromatic amino acid family metabolic process,maleylacetoacetate isomerase activity,isomerase activity
LOC110681087	6469.36	1.56431	0.0938291	16.6719	2.0977e-62	6.00603e-61	AAEL025939
LOC5574665	6474.32	1.75326	0.10518	16.6692	2.19646e-62	6.27702e-61	AAEL011309	orotidine-5'-phosphate decarboxylase, putative [Source:VB Community Annotation]			GO:0003824,GO:0004588,GO:0004590,GO:0006207,GO:0006221,GO:0008152,GO:0009116,GO:0016740,GO:0016757,GO:0016829,GO:0016831,GO:0044205	catalytic activity,orotate phosphoribosyltransferase activity,orotidine-5'-phosphate decarboxylase activity,'de novo' pyrimidine nucleobase biosynthetic process,pyrimidine nucleotide biosynthetic process,metabolic process,nucleoside metabolic process,transferase activity,transferase activity, transferring glycosyl groups,lyase activity,carboxy-lyase activity,'de novo' UMP biosynthetic process
LOC5574477	1206.28	-2.46868	0.148299	-16.6467	3.19948e-62	9.1263e-61	AAEL002404	receptor protein tyrosine kinase [Source:VB Community Annotation]			GO:0004672,GO:0004713,GO:0005515,GO:0005524,GO:0006468,GO:0016020,GO:0016021,GO:0018108	protein kinase activity,protein tyrosine kinase activity,protein binding,ATP binding,protein phosphorylation,membrane,integral component of membrane,peptidyl-tyrosine phosphorylation
LOC23687932	800.093	3.73738	0.224699	16.6329	4.02792e-62	1.14679e-60	AAEL017512				GO:0004553,GO:0004566,GO:0005764,GO:0005975,GO:0008152,GO:0016787,GO:0016798	hydrolase activity, hydrolyzing O-glycosyl compounds,beta-glucuronidase activity,lysosome,carbohydrate metabolic process,metabolic process,hydrolase activity,hydrolase activity, acting on glycosyl bonds
LOC5569616	539.973	3.12564	0.187969	16.6285	4.332e-62	1.23106e-60	AAEL014832	Putative sorbin and sh3 domain-containing protein [Source:UniProtKB/TrEMBL;Acc:A0A0N8ERZ4]			GO:0005515	protein binding
LOC5566189	199.202	3.72418	0.224398	16.5963	7.40717e-62	2.10104e-60	AAEL005247				GO:0000981,GO:0003677,GO:0005634,GO:0006355,GO:0006357,GO:0007275,GO:0043565	DNA-binding transcription factor activity, RNA polymerase II-specific,DNA binding,nucleus,regulation of transcription, DNA-templated,regulation of transcription by RNA polymerase II,multicellular organism development,sequence-specific DNA binding
LOC5574438	814.312	-2.01802	0.121606	-16.5948	7.59693e-62	2.15086e-60	AAEL011158	disulfide oxidoreductase [Source:VB Community Annotation]			GO:0016491,GO:0046872,GO:0050660,GO:0051536,GO:0051537,GO:0055114	oxidoreductase activity,metal ion binding,flavin adenine dinucleotide binding,iron-sulfur cluster binding,2 iron, 2 sulfur cluster binding,oxidation-reduction process
LOC110679163	1375.29	-1.59752	0.0964406	-16.5648	1.25254e-61	3.53964e-60	AAEL000427				GO:0016020,GO:0016021,GO:0016746	membrane,integral component of membrane,transferase activity, transferring acyl groups
LOC5577642	344.479	2.69873	0.163064	16.5501	1.59867e-61	4.50943e-60	AAEL003213				GO:0006147,GO:0008270,GO:0008892,GO:0016787,GO:0016810,GO:0046872	guanine catabolic process,zinc ion binding,guanine deaminase activity,hydrolase activity,hydrolase activity, acting on carbon-nitrogen (but not peptide) bonds,metal ion binding
LOC5572902	660.85	-2.59567	0.15697	-16.536	2.01929e-61	5.68237e-60	AAEL019711				GO:0004435,GO:0005509,GO:0006629,GO:0007165,GO:0008081,GO:0016042,GO:0016787,GO:0035556	phosphatidylinositol phospholipase C activity,calcium ion binding,lipid metabolic process,signal transduction,phosphoric diester hydrolase activity,lipid catabolic process,hydrolase activity,intracellular signal transduction
LOC5564238	3527.65	-2.79982	0.169317	-16.5359	2.02196e-61	5.68237e-60	AAEL004172	tubulin alpha chain [Source:VB Community Annotation]			GO:0000166,GO:0003924,GO:0005200,GO:0005525,GO:0005874,GO:0007010,GO:0007017	nucleotide binding,GTPase activity,structural constituent of cytoskeleton,GTP binding,microtubule,cytoskeleton organization,microtubule-based process
LOC5576646	432.3	-2.41288	0.146023	-16.524	2.46311e-61	6.90941e-60	AAEL021805				GO:0004842,GO:0016567,GO:0046872	ubiquitin-protein transferase activity,protein ubiquitination,metal ion binding
LOC5571390	851.832	1.68298	0.101888	16.5179	2.72876e-61	7.64052e-60	AAEL009038	prolylcarboxypeptidase, putative [Source:VB Community Annotation]			GO:0006508,GO:0008236,GO:0016787	proteolysis,serine-type peptidase activity,hydrolase activity
LOC5575241	259.033	-3.30053	0.199822	-16.5173	2.75393e-61	7.69685e-60	AAEL011715				GO:0005634,GO:0006281,GO:0030915,GO:0035556,GO:0046872	nucleus,DNA repair,Smc5-Smc6 complex,intracellular signal transduction,metal ion binding
LOC5580096	2406.57	-1.33419	0.0807915	-16.514	2.90844e-61	8.11379e-60	AAEL002145	gonadotropin inducible transcription factor [Source:VB Community Annotation]			GO:0003676	nucleic acid binding
LOC5580130	933.617	1.56598	0.0948421	16.5114	3.0358e-61	8.45363e-60	AAEL002451	zinc finger protein [Source:VB Community Annotation]			GO:0000981,GO:0003676,GO:0003677,GO:0005634,GO:0006355,GO:0006357,GO:0043565	DNA-binding transcription factor activity, RNA polymerase II-specific,nucleic acid binding,DNA binding,nucleus,regulation of transcription, DNA-templated,regulation of transcription by RNA polymerase II,sequence-specific DNA binding
LOC5568799	630.801	2.6637	0.161352	16.5086	3.18125e-61	8.84249e-60	AAEL001159	ribonuclease t2 [Source:VB Community Annotation]			GO:0003723,GO:0033897,GO:0090502	RNA binding,ribonuclease T2 activity,RNA phosphodiester bond hydrolysis, endonucleolytic
LOC5568195	682.25	2.77436	0.168309	16.4837	4.80313e-61	1.33263e-59	AAEL006619				GO:0004864,GO:0005737,GO:0032515,GO:0042325	protein phosphatase inhibitor activity,cytoplasm,negative regulation of phosphoprotein phosphatase activity,regulation of phosphorylation
LOC5574727	689.777	3.64613	0.221326	16.474	5.63784e-61	1.56137e-59	AAEL011365				GO:0005515,GO:0005856	protein binding,cytoskeleton
LOC5564113	324.369	3.53293	0.214477	16.4723	5.80673e-61	1.60523e-59	AAEL019693				GO:0005515	protein binding
LOC5572314	1088.18	-1.55607	0.0944885	-16.4684	6.18882e-61	1.70775e-59	AAEL022930
LOC5570696	1754.27	3.54003	0.215271	16.4445	9.18291e-61	2.52937e-59	AAEL008495				GO:0005856	cytoskeleton
LOC5569213	1812.85	3.54822	0.21578	16.4437	9.31233e-61	2.56039e-59	AAEL023657				GO:0004489,GO:0006555,GO:0016491,GO:0035999,GO:0055114	methylenetetrahydrofolate reductase (NAD(P)H) activity,methionine metabolic process,oxidoreductase activity,tetrahydrofolate interconversion,oxidation-reduction process
LOC5572364	381.57	-2.71713	0.165273	-16.4403	9.84312e-61	2.70145e-59	AAEL009749	Sodium-dependent phosphate transporter [Source:UniProtKB/TrEMBL;Acc:A0A1S4FN96]			GO:0016020,GO:0016021,GO:0022857,GO:0055085	membrane,integral component of membrane,transmembrane transporter activity,transmembrane transport
LOC5576059	1857.45	-1.63927	0.0997239	-16.4381	1.02074e-60	2.79639e-59	AAEL026227				GO:0005515,GO:0007049,GO:0007084,GO:0035307,GO:0051301,GO:0051721	protein binding,cell cycle,mitotic nuclear envelope reassembly,positive regulation of protein dephosphorylation,cell division,protein phosphatase 2A binding
LOC5565097	481.799	-2.42539	0.147557	-16.437	1.03875e-60	2.84063e-59	AAEL004583				GO:0004867,GO:0010466,GO:0010951,GO:0016020,GO:0016021,GO:0030414	serine-type endopeptidase inhibitor activity,negative regulation of peptidase activity,negative regulation of endopeptidase activity,membrane,integral component of membrane,peptidase inhibitor activity
LOC5576370	2839.37	2.08087	0.126682	16.4259	1.24751e-60	3.4054e-59	AAEL012466	integrin beta subunit [Source:VB Community Annotation]			GO:0003676,GO:0005634,GO:0007155,GO:0007229,GO:0008270,GO:0016020,GO:0016021,GO:0046872	nucleic acid binding,nucleus,cell adhesion,integrin-mediated signaling pathway,zinc ion binding,membrane,integral component of membrane,metal ion binding
LOC5572863	1625.37	-2.07952	0.126612	-16.4243	1.28227e-60	3.49403e-59	AAEL010081				GO:0003824,GO:0005783,GO:0005789,GO:0006506,GO:0016020,GO:0016021,GO:0016740,GO:0051377	catalytic activity,endoplasmic reticulum,endoplasmic reticulum membrane,GPI anchor biosynthetic process,membrane,integral component of membrane,transferase activity,mannose-ethanolamine phosphotransferase activity
LOC5566859	534.332	-2.18367	0.132989	-16.42	1.37654e-60	3.74419e-59	AAEL000822	kinesin-like protein KLP68D [Source:VB Community Annotation]			GO:0000166,GO:0003774,GO:0003777,GO:0005524,GO:0005874,GO:0007018,GO:0008017	nucleotide binding,motor activity,microtubule motor activity,ATP binding,microtubule,microtubule-based movement,microtubule binding
LOC5565185	334.611	-2.94696	0.179573	-16.4109	1.5975e-60	4.33746e-59	AAEL004630				GO:0005515	protein binding
LOC5569768	220.907	3.63523	0.22153	16.4097	1.63126e-60	4.42124e-59	AAEL007897	spaetzle-like cytokine [Source:VB Community Annotation]	SPZ4		GO:0016020,GO:0016021	membrane,integral component of membrane
LOC5567679	2296.03	-1.80984	0.110305	-16.4075	1.68952e-60	4.57101e-59	AAEL006247				GO:0046872	metal ion binding
LOC5577491	7445.89	1.5126	0.092211	16.4037	1.79928e-60	4.85933e-59	AAEL013227	PIWI [Source:VB Community Annotation]	PIWI6		GO:0003676,GO:0005515,GO:0031047	nucleic acid binding,protein binding,gene silencing by RNA
LOC5571050	710.607	-1.89494	0.115557	-16.3983	1.96696e-60	5.30278e-59	AAEL019961				GO:0003676	nucleic acid binding
LOC5578706	494.964	-2.46274	0.150302	-16.3853	2.43639e-60	6.55672e-59	AAEL023635
LOC5571752	2770.93	-1.34978	0.0823796	-16.3849	2.45086e-60	6.58404e-59	AAEL009274				GO:0005634,GO:0005737,GO:0005819	nucleus,cytoplasm,spindle
LOC5579795	12459.1	1.28239	0.0783269	16.3723	3.01639e-60	8.08902e-59	AAEL003957				GO:0003779,GO:0015629,GO:0030042	actin binding,actin cytoskeleton,actin filament depolymerization
LOC5568153	822.63	3.51007	0.214403	16.3713	3.06404e-60	8.20236e-59	AAEL006593				GO:0000981,GO:0003677,GO:0005634,GO:0006355,GO:0006357,GO:0043565	DNA-binding transcription factor activity, RNA polymerase II-specific,DNA binding,nucleus,regulation of transcription, DNA-templated,regulation of transcription by RNA polymerase II,sequence-specific DNA binding
LOC5578164	1454.17	-2.31648	0.141512	-16.3696	3.1552e-60	8.43158e-59	AAEL013546	estrogen-related receptor (ERR) [Source:VB Community Annotation]			GO:0003677,GO:0003700,GO:0003707,GO:0005496,GO:0005634,GO:0006355,GO:0008270,GO:0042025,GO:0043401,GO:0043565,GO:0046872	DNA binding,DNA-binding transcription factor activity,steroid hormone receptor activity,steroid binding,nucleus,regulation of transcription, DNA-templated,zinc ion binding,host cell nucleus,steroid hormone mediated signaling pathway,sequence-specific DNA binding,metal ion binding
LOC5574622	457.717	3.96232	0.242118	16.3652	3.38759e-60	9.03675e-59	AAEL022734				GO:0000166,GO:0005524,GO:0016020,GO:0016021,GO:0016887	nucleotide binding,ATP binding,membrane,integral component of membrane,ATPase activity
LOC5575737	523.76	3.15563	0.192833	16.3646	3.42433e-60	9.11878e-59	AAEL019592				GO:0005509,GO:0005515,GO:0005576	calcium ion binding,protein binding,extracellular region
LOC5573370	1339.2	-1.79708	0.110046	-16.3303	6.00562e-60	1.59647e-58	AAEL010470	calcineurin b subunit [Source:VB Community Annotation]			GO:0005509	calcium ion binding
LOC5567700	200.431	-3.11091	0.190548	-16.3261	6.43833e-60	1.70851e-58	AAEL006274	glucose transporter (sugar transporter [Source:VB Community Annotation]			GO:0016020,GO:0016021,GO:0022857,GO:0055085	membrane,integral component of membrane,transmembrane transporter activity,transmembrane transport
LOC5568675	411.294	2.67952	0.16425	16.3137	7.8864e-60	2.08914e-58	AAEL007038	prolyl 4-hydroxylase alpha subunit 1 [Source:VB Community Annotation]			GO:0004656,GO:0005506,GO:0005515,GO:0005783,GO:0005788,GO:0016491,GO:0016702,GO:0016705,GO:0019511,GO:0031418,GO:0046872,GO:0051213,GO:0055114	procollagen-proline 4-dioxygenase activity,iron ion binding,protein binding,endoplasmic reticulum,endoplasmic reticulum lumen,oxidoreductase activity,oxidoreductase activity, acting on single donors with incorporation of molecular oxygen, incorporation of two atoms of oxygen,oxidoreductase activity, acting on paired donors, with incorporation or reduction of molecular oxygen,peptidyl-proline hydr…
LOC5569069	2145.58	-2.01584	0.123622	-16.3065	8.87701e-60	2.34748e-58	AAEL001204	sterol o-acyltransferase [Source:VB Community Annotation]			GO:0004144,GO:0005783,GO:0005789,GO:0008374,GO:0016020,GO:0016021,GO:0016740,GO:0016746,GO:0019432,GO:0042572,GO:0046486,GO:0050252	diacylglycerol O-acyltransferase activity,endoplasmic reticulum,endoplasmic reticulum membrane,O-acyltransferase activity,membrane,integral component of membrane,transferase activity,transferase activity, transferring acyl groups,triglyceride biosynthetic process,retinol metabolic process,glycerolipid metabolic process,retinol O-fatty-acyltransferase activity
LOC5567974	620.634	-2.09853	0.128788	-16.2944	1.08115e-59	2.85409e-58	AAEL006407
LOC5563854	903.796	-2.38332	0.146318	-16.2886	1.1897e-59	3.13521e-58	AAEL014180				GO:0005515,GO:0008270	protein binding,zinc ion binding
LOC5565603	1054.97	-1.74682	0.107258	-16.2862	1.237e-59	3.25422e-58	AAEL004892				GO:0003676,GO:0005634,GO:0008270,GO:0046872	nucleic acid binding,nucleus,zinc ion binding,metal ion binding
LOC5570937	225.842	4.34362	0.266771	16.2822	1.32051e-59	3.46794e-58	AAEL019772
LOC5569927	2831.15	-2.16007	0.132678	-16.2806	1.3563e-59	3.5558e-58	AAEL008015				GO:0005515,GO:0005634	protein binding,nucleus
LOC5578704	1069.96	-2.25278	0.138508	-16.2646	1.75921e-59	4.60418e-58	AAEL013813				GO:0004483,GO:0006370,GO:0008168,GO:0032259,GO:0080009	mRNA (nucleoside-2'-O-)-methyltransferase activity,7-methylguanosine mRNA capping,methyltransferase activity,methylation,mRNA methylation
LOC5572994	622.36	2.58704	0.15917	16.2533	2.11645e-59	5.52964e-58	AAEL001937	selenium-binding protein [Source:VB Community Annotation]			GO:0008430	selenium binding
LOC5571917	1167.27	-2.31998	0.142756	-16.2514	2.18422e-59	5.69692e-58	AAEL023532				GO:0003723,GO:0003724,GO:0004386,GO:0005737,GO:0032574,GO:0035194	RNA binding,RNA helicase activity,helicase activity,cytoplasm,5'-3' RNA helicase activity,post-transcriptional gene silencing by RNA
LOC5572726	1015.55	-1.63696	0.100738	-16.2497	2.24285e-59	5.83985e-58	AAEL010015				GO:0003677,GO:0005515	DNA binding,protein binding
LOC5565228	418.327	-2.56311	0.15777	-16.2459	2.38832e-59	6.20801e-58	AAEL018326	Sodium/nucleoside cotransporter [Source:UniProtKB/TrEMBL;Acc:A0A1S4G7K8]			GO:0005337,GO:0016020,GO:0016021,GO:1901642	nucleoside transmembrane transporter activity,membrane,integral component of membrane,nucleoside transmembrane transport
LOC5576174	930.237	3.73739	0.230122	16.2409	2.58939e-59	6.71917e-58	AAEL012370	Brain chitinase and chia [Source:UniProtKB/TrEMBL;Acc:A0A1S4FVX1]			GO:0004553,GO:0005975,GO:0008061,GO:0008152,GO:0016787,GO:0016798	hydrolase activity, hydrolyzing O-glycosyl compounds,carbohydrate metabolic process,chitin binding,metabolic process,hydrolase activity,hydrolase activity, acting on glycosyl bonds
LOC5570819	1406.19	3.66201	0.225505	16.2391	2.66653e-59	6.90758e-58	AAEL008607	tep3 [Source:VB Community Annotation]			GO:0004866,GO:0005576,GO:0005615,GO:0010951	endopeptidase inhibitor activity,extracellular region,extracellular space,negative regulation of endopeptidase activity
LOC5567644	781.454	-2.23019	0.137343	-16.238	2.71564e-59	7.02286e-58	AAEL006236	dtdp-glucose 4-6-dehydratase [Source:VB Community Annotation]
LOC5576021	827.416	-2.60675	0.160542	-16.2372	2.75276e-59	7.10679e-58	AAEL019755				GO:0005509,GO:0005515,GO:0006897,GO:0016020,GO:0016021	calcium ion binding,protein binding,endocytosis,membrane,integral component of membrane
LOC5569135	1112.93	-1.86908	0.115264	-16.2157	3.90769e-59	1.00714e-57	AAEL007397	Ecdysone-induced protein 75B isoform A Nuclear receptor [Source:VB Community Annotation]	E75		GO:0003677,GO:0003700,GO:0003707,GO:0004879,GO:0005634,GO:0006355,GO:0008270,GO:0030522,GO:0042025,GO:0043565,GO:0046872	DNA binding,DNA-binding transcription factor activity,steroid hormone receptor activity,nuclear receptor activity,nucleus,regulation of transcription, DNA-templated,zinc ion binding,intracellular receptor signaling pathway,host cell nucleus,sequence-specific DNA binding,metal ion binding
LOC110675977	819.091	-2.78819	0.171946	-16.2155	3.92172e-59	1.00905e-57	AAEL023581				GO:0006486,GO:0016020	protein glycosylation,membrane
LOC110677709	412.97	3.86202	0.238336	16.2041	4.71511e-59	1.21114e-57	AAEL027706				GO:0005085,GO:0006897,GO:0007165,GO:0016020,GO:0043087	guanyl-nucleotide exchange factor activity,endocytosis,signal transduction,membrane,regulation of GTPase activity
LOC5568262	1966.26	2.80569	0.173276	16.192	5.74188e-59	1.4724e-57	AAEL006690	ribbon [Source:VB Community Annotation]			GO:0003677,GO:0005515,GO:0005634	DNA binding,protein binding,nucleus
LOC5574190	7977.37	1.79365	0.110793	16.1891	6.02004e-59	1.54113e-57	AAEL002308	butyrate response factor 1 (TIS11B protein) [Source:VB Community Annotation]			GO:0046872	metal ion binding
LOC5575839	338.065	3.11527	0.192522	16.1814	6.82401e-59	1.74402e-57	AAEL012102
LOC5567545	539.414	-2.66817	0.165067	-16.1642	9.0154e-59	2.30021e-57	AAEL006123	trypsin, putative [Source:VB Community Annotation]			GO:0004252,GO:0006508	serine-type endopeptidase activity,proteolysis
LOC5567615	2012.8	-1.84212	0.114142	-16.1388	1.36238e-58	3.4702e-57	AAEL006208				GO:0016567	protein ubiquitination
casRx	2099.13	-11.7418	0.727942	-16.1301	1.56858e-58	3.98875e-57
LOC5571961	913.264	-2.15053	0.133333	-16.129	1.59477e-58	4.04859e-57	AAEL012369
LOC5570705	201.148	-3.51947	0.218216	-16.1283	1.61274e-58	4.08739e-57	AAEL001442	map-kinase activating death domain protein (madd)/denn/aex-3(c.elegans) [Source:VB Community Annotation]			GO:0005737,GO:0006915,GO:0016020	cytoplasm,apoptotic process,membrane
LOC5564327	1650.86	-2.60238	0.161388	-16.125	1.70269e-58	4.30821e-57	AAEL000584	sex-determining region y protein, sry [Source:VB Community Annotation]			GO:0003677,GO:0005634,GO:0006355	DNA binding,nucleus,regulation of transcription, DNA-templated
LOC5566091	436.065	4.27709	0.265339	16.1193	1.86585e-58	4.71321e-57	AAEL005160	sulphate transporter [Source:VB Community Annotation]			GO:0008271,GO:0008272,GO:0015116,GO:0016020,GO:0016021,GO:0055085,GO:1902358	secondary active sulfate transmembrane transporter activity,sulfate transport,sulfate transmembrane transporter activity,membrane,integral component of membrane,transmembrane transport,sulfate transmembrane transport
LOC5576990	965.407	4.41826	0.274213	16.1125	2.08413e-58	5.25586e-57	AAEL003051				GO:0005634,GO:0042025,GO:0043565	nucleus,host cell nucleus,sequence-specific DNA binding
LOC5569926	1209.52	-1.41274	0.0876845	-16.1116	2.11353e-58	5.32121e-57	AAEL008020	sorting nexin [Source:VB Community Annotation]			GO:0016020,GO:0016021,GO:0035091	membrane,integral component of membrane,phosphatidylinositol binding
LOC110675554	258.948	-3.7308	0.231605	-16.1085	2.22429e-58	5.59082e-57	AAEL025499
LOC5568068	895.729	-2.53855	0.157604	-16.1071	2.27363e-58	5.70542e-57	AAEL006523	crk [Source:VB Community Annotation]			GO:0005515	protein binding
LOC110681080	592.386	3.08458	0.191607	16.0985	2.61378e-58	6.54819e-57	AAEL023310				GO:0005515	protein binding
LOC5574148	669.131	3.62197	0.225028	16.0957	2.73626e-58	6.8438e-57	AAEL020299				GO:0005515	protein binding
LOC5566597	709.019	3.66274	0.227673	16.0877	3.11262e-58	7.77236e-57	AAEL000781	E3 ubiquitin-protein ligase [Source:UniProtKB/TrEMBL;Acc:A0A1S4EWV7]			GO:0005515,GO:0005634,GO:0005737,GO:0006511,GO:0007275,GO:0008270,GO:0016567,GO:0016740,GO:0042025,GO:0046872	protein binding,nucleus,cytoplasm,ubiquitin-dependent protein catabolic process,multicellular organism development,zinc ion binding,protein ubiquitination,transferase activity,host cell nucleus,metal ion binding
LOC5565958	960.866	-2.03433	0.126561	-16.074	3.88228e-58	9.67839e-57	AAEL005080	protein phosphatase-5 [Source:VB Community Annotation]			GO:0004721,GO:0005515,GO:0006470,GO:0016787,GO:0046872	phosphoprotein phosphatase activity,protein binding,protein dephosphorylation,hydrolase activity,metal ion binding
LOC110680285	509.559	4.0333	0.250925	16.0737	3.89844e-58	9.70278e-57	AAEL026175				GO:0005319,GO:0006869	lipid transporter activity,lipid transport
LOC5575573	384.316	2.64202	0.164372	16.0734	3.91746e-58	9.73422e-57	AAEL002678	ras suppressor protein 1, rsu1 [Source:VB Community Annotation]			GO:0005515	protein binding
LOC5579338	544.328	3.57948	0.222776	16.0677	4.30028e-58	1.06681e-56	AAEL025607				GO:0007155,GO:0007229,GO:0008305,GO:0016020,GO:0016021	cell adhesion,integrin-mediated signaling pathway,integrin complex,membrane,integral component of membrane
LOC5578052	2355.54	-2.5087	0.156287	-16.0519	5.54511e-58	1.37338e-56	AAEL013487	RHO guanyl-nucleotide exchange factor, putative [Source:VB Community Annotation]			GO:0005085,GO:0005737	guanyl-nucleotide exchange factor activity,cytoplasm
LOC5564606	1788.28	1.99042	0.124009	16.0506	5.66261e-58	1.40021e-56	AAEL014526	sideroflexin 1,2,3 [Source:VB Community Annotation]			GO:0005739,GO:0006811,GO:0006865,GO:0015075,GO:0016020,GO:0016021,GO:0031966,GO:0034220,GO:0055085	mitochondrion,ion transport,amino acid transport,ion transmembrane transporter activity,membrane,integral component of membrane,mitochondrial membrane,ion transmembrane transport,transmembrane transport
LOC5578809	363.524	-2.65495	0.165465	-16.0454	6.15586e-58	1.51971e-56	AAEL013847	diacylglycerol kinase, zeta, iota [Source:VB Community Annotation]			GO:0003951,GO:0004143,GO:0005515,GO:0007165,GO:0007205,GO:0016301,GO:0016310,GO:0035556	NAD+ kinase activity,diacylglycerol kinase activity,protein binding,signal transduction,protein kinase C-activating G protein-coupled receptor signaling pathway,kinase activity,phosphorylation,intracellular signal transduction
LOC5570942	1173.55	-2.94038	0.183269	-16.0441	6.28642e-58	1.54943e-56	AAEL008678				GO:0005515,GO:0005737,GO:0005856,GO:0005874,GO:0007049,GO:0008017,GO:0051010,GO:0051301,GO:0070507	protein binding,cytoplasm,cytoskeleton,microtubule,cell cycle,microtubule binding,microtubule plus-end binding,cell division,regulation of microtubule cytoskeleton organization
LOC5568620	452.812	-2.26432	0.141143	-16.0427	6.42637e-58	1.58137e-56	AAEL006964				GO:0030246	carbohydrate binding
LOC5571874	1403.73	-2.18996	0.13651	-16.0425	6.45163e-58	1.58502e-56	AAEL024528				GO:0000166,GO:0003774,GO:0003779,GO:0005515,GO:0005524,GO:0016459,GO:0051015	nucleotide binding,motor activity,actin binding,protein binding,ATP binding,myosin complex,actin filament binding
LOC5567316	170.091	4.83016	0.301146	16.0393	6.79323e-58	1.66625e-56	AAEL013894				GO:0016747	transferase activity, transferring acyl groups other than amino-acyl groups
LOC110676920	423.05	4.54405	0.283461	16.0306	7.81326e-58	1.91337e-56	AAEL018041				GO:0008194,GO:0016020,GO:0016021,GO:0016740,GO:0016757,GO:0016758	UDP-glycosyltransferase activity,membrane,integral component of membrane,transferase activity,transferase activity, transferring glycosyl groups,transferase activity, transferring hexosyl groups
LOC5565821	1925.76	-1.82879	0.114095	-16.0286	8.06157e-58	1.97101e-56
LOC5565618	659.064	2.40572	0.150237	16.0128	1.04006e-57	2.53882e-56	AAEL021782				GO:0007165	signal transduction
LOC5567414	1039.27	2.1181	0.132327	16.0065	1.15098e-57	2.80508e-56	AAEL025199				GO:0000166,GO:0003824,GO:0004329,GO:0004486,GO:0004488,GO:0005524,GO:0006730,GO:0016874,GO:0035999,GO:0055114	nucleotide binding,catalytic activity,formate-tetrahydrofolate ligase activity,methylenetetrahydrofolate dehydrogenase [NAD(P)+] activity,methylenetetrahydrofolate dehydrogenase (NADP+) activity,ATP binding,one-carbon metabolic process,ligase activity,tetrahydrofolate interconversion,oxidation-reduction process
LOC5568622	2545.59	-2.24691	0.140712	-15.9682	2.12939e-57	5.18128e-56	AAEL006968				GO:0030246	carbohydrate binding
LOC110681383	2673.01	1.49898	0.0939653	15.9525	2.73908e-57	6.65416e-56	AAEL025151				GO:0005623,GO:0005783,GO:0015031,GO:0016020,GO:0016021,GO:0031204	obsolete cell,endoplasmic reticulum,protein transport,membrane,integral component of membrane,posttranslational protein targeting to membrane, translocation
LOC5578093	2402.02	1.47446	0.0924372	15.9509	2.8062e-57	6.80637e-56	AAEL003449	structural maintenance of chromosomes 2 smc2 [Source:VB Community Annotation]			GO:0005515,GO:0005524,GO:0005634,GO:0005694,GO:0030261,GO:0051276	protein binding,ATP binding,nucleus,chromosome,chromosome condensation,chromosome organization
LOC5566471	720.768	2.84196	0.17832	15.9374	3.48371e-57	8.43624e-56	AAEL005407	annexin x [Source:VB Community Annotation]			GO:0005509,GO:0005544	calcium ion binding,calcium-dependent phospholipid binding
LOC5564353	2367.13	-2.06141	0.129409	-15.9294	3.95958e-57	9.57339e-56	AAEL004221	glycogen synthase [Source:VB Community Annotation]			GO:0004373,GO:0005978,GO:0016740,GO:0016757	glycogen (starch) synthase activity,glycogen biosynthetic process,transferase activity,transferase activity, transferring glycosyl groups
LOC5569901	2660.36	1.49867	0.0941085	15.9249	4.25414e-57	1.02693e-55	AAEL007987	SEC63 protein, putative [Source:VB Community Annotation]	sec63		GO:0005623,GO:0005783,GO:0015031,GO:0016020,GO:0016021,GO:0031204	obsolete cell,endoplasmic reticulum,protein transport,membrane,integral component of membrane,posttranslational protein targeting to membrane, translocation
LOC5563621	1130.77	-1.90478	0.119641	-15.9208	4.5434e-57	1.09502e-55	AAEL000064	dopachrome-conversion enzyme (DCE) isoenzyme, putative [Source:VB Community Annotation]
LOC5566562	743.751	-2.46736	0.155091	-15.9091	5.48173e-57	1.31908e-55	AAEL019531				GO:0000166,GO:0000287,GO:0005524,GO:0015914,GO:0016020,GO:0016021,GO:0034204,GO:0140326	nucleotide binding,magnesium ion binding,ATP binding,phospholipid transport,membrane,integral component of membrane,lipid translocation,ATPase-coupled intramembrane lipid transporter activity
LOC5573671	468.624	-2.1442	0.134791	-15.9075	5.61871e-57	1.34991e-55	AAEL010679	monocyte to macrophage differentiation protein [Source:VB Community Annotation]			GO:0016020,GO:0016021,GO:0019835	membrane,integral component of membrane,cytolysis
LOC5576179	1421.57	-2.78482	0.175383	-15.8785	8.93233e-57	2.14263e-55	AAEL012371				GO:0003677,GO:0005515	DNA binding,protein binding
LOC5564091	3443.29	1.53191	0.0965185	15.8717	9.95763e-57	2.38482e-55	AAEL028021
LOC5566857	207.531	3.62591	0.228494	15.8687	1.04348e-56	2.49518e-55	AAEL000834	dimethylaniline monooxygenase [Source:VB Community Annotation]			GO:0004497,GO:0004499,GO:0016491,GO:0050660,GO:0050661,GO:0055114	monooxygenase activity,N,N-dimethylaniline monooxygenase activity,oxidoreductase activity,flavin adenine dinucleotide binding,NADP binding,oxidation-reduction process
LOC23687875	38968.7	1.76722	0.111391	15.865	1.10774e-56	2.64468e-55	AAEL017455
LOC5565261	896.16	-2.24632	0.141646	-15.8587	1.22367e-56	2.91689e-55	AAEL020830				GO:0000166,GO:0004672,GO:0004674,GO:0005524,GO:0006468,GO:0016301,GO:0016310	nucleotide binding,protein kinase activity,protein serine/threonine kinase activity,ATP binding,protein phosphorylation,kinase activity,phosphorylation
LOC5574137	4908.7	4.07527	0.257043	15.8545	1.30925e-56	3.11602e-55	AAEL010944
LOC5563585	1244.96	1.78246	0.112448	15.8515	1.37352e-56	3.26387e-55	AAEL011221	nmda receptor glutamate-binding chain [Source:VB Community Annotation]			GO:0016020,GO:0016021	membrane,integral component of membrane
LOC5578162	620.849	-2.72489	0.171907	-15.851	1.38406e-56	3.28379e-55	AAEL013544	snail protein, putative [Source:VB Community Annotation]			GO:0003676	nucleic acid binding
LOC110675809	359.475	-2.92224	0.184623	-15.8282	1.98933e-56	4.71252e-55	AAEL025808				GO:0005515,GO:0019005,GO:0031146	protein binding,SCF ubiquitin ligase complex,SCF-dependent proteasomal ubiquitin-dependent protein catabolic process
LOC110681384	196.462	-3.28388	0.207485	-15.827	2.02529e-56	4.79024e-55	AAEL023315
LOC5571246	393.595	-2.2128	0.139833	-15.8245	2.10766e-56	4.97734e-55	AAEL001551				GO:0003676,GO:0005634,GO:0008270,GO:0046872	nucleic acid binding,nucleus,zinc ion binding,metal ion binding
LOC5568362	240.955	6.22037	0.393204	15.8197	2.27469e-56	5.36348e-55	AAEL001098	clip-domain serine protease, putative [Source:VB Community Annotation]			GO:0004252,GO:0006508	serine-type endopeptidase activity,proteolysis
LOC5577489	1981.17	2.12637	0.134539	15.8049	2.87971e-56	6.77957e-55	AAEL013229	Tubulin alpha chain [Source:UniProtKB/TrEMBL;Acc:Q16JS3]			GO:0000166,GO:0003924,GO:0005200,GO:0005525,GO:0005737,GO:0005874,GO:0007010,GO:0007017	nucleotide binding,GTPase activity,structural constituent of cytoskeleton,GTP binding,cytoplasm,microtubule,cytoskeleton organization,microtubule-based process
LOC5564518	16722	2.26435	0.143499	15.7795	4.30444e-56	1.01181e-54	AAEL019716				GO:0005634,GO:0005737,GO:0005819	nucleus,cytoplasm,spindle
LOC5570119	710.363	-2.00088	0.12692	-15.7649	5.42932e-56	1.27426e-54	AAEL008095				GO:0005525	GTP binding
LOC5566322	6310.43	1.70461	0.108133	15.764	5.5046e-56	1.28994e-54	AAEL005289	ornithine aminotransferase [Source:VB Community Annotation]			GO:0003824,GO:0004587,GO:0008483,GO:0030170,GO:0050155,GO:0055129	catalytic activity,ornithine-oxo-acid transaminase activity,transaminase activity,pyridoxal phosphate binding,ornithine(lysine) transaminase activity,L-proline biosynthetic process
LOC5569031	874.724	-1.82528	0.115824	-15.7591	5.95077e-56	1.39235e-54	AAEL019714				GO:0016020,GO:0016021	membrane,integral component of membrane
LOC5568448	590.968	-2.56672	0.163008	-15.746	7.32191e-56	1.71054e-54	AAEL006865				GO:0005515,GO:0031929,GO:0031931	protein binding,TOR signaling,TORC1 complex
LOC5576894	9883.02	1.06629	0.0677533	15.7379	8.318e-56	1.94027e-54	AAEL003046	saposin [Source:VB Community Annotation]			GO:0005576,GO:0005764,GO:0006629,GO:0006665	extracellular region,lysosome,lipid metabolic process,sphingolipid metabolic process
LOC5567339	2114.65	-2.58393	0.164243	-15.7323	9.08029e-56	2.11485e-54	AAEL006012	factor for adipocyte differentiation [Source:VB Community Annotation]			GO:0005515,GO:0016020,GO:0016021	protein binding,membrane,integral component of membrane
LOC5574017	903.956	-1.56353	0.0994766	-15.7176	1.14596e-55	2.66494e-54	AAEL010860				GO:0005829,GO:0032456,GO:0042147,GO:1990745	cytosol,endocytic recycling,retrograde transport, endosome to Golgi,EARP complex
LOC5566136	682.723	3.28479	0.209224	15.6999	1.51439e-55	3.51634e-54	AAEL005206	c-terminal pdz ligand of neuronal nitric oxide synthase protein [Source:VB Community Annotation]			GO:0005515	protein binding
LOC5574042	856.66	2.92347	0.186282	15.6938	1.66769e-55	3.8664e-54	AAEL010879				GO:0005765,GO:0010008,GO:0016020,GO:0016021,GO:0046872	lysosomal membrane,endosome membrane,membrane,integral component of membrane,metal ion binding
LOC5564426	909.045	-1.79769	0.114588	-15.6883	1.81794e-55	4.20833e-54	AAEL014440	juvenile hormone-inducible protein, putative [Source:VB Community Annotation]
LOC5564278	381.027	-2.25362	0.143817	-15.67	2.42406e-55	5.60292e-54	AAEL014379	adrenodoxin [Source:VB Community Annotation]			GO:0009055,GO:0022900,GO:0051536,GO:0051537	electron transfer activity,electron transport chain,iron-sulfur cluster binding,2 iron, 2 sulfur cluster binding
LOC5573983	934.563	-2.26598	0.144689	-15.661	2.79352e-55	6.4471e-54	AAEL018200				GO:0003824,GO:0016020,GO:0016021	catalytic activity,membrane,integral component of membrane
LOC23687787	3609.32	-3.11964	0.199527	-15.6352	4.19449e-55	9.66573e-54	AAEL017367
LOC5567844	764.554	-2.28652	0.146249	-15.6344	4.2461e-55	9.76988e-54	AAEL000980				GO:0003676,GO:0005634,GO:0008270,GO:0046872	nucleic acid binding,nucleus,zinc ion binding,metal ion binding
LOC5565763	776.09	3.78396	0.24238	15.6117	6.05995e-55	1.39224e-53	AAEL018103				GO:0005319,GO:0006869,GO:0045735	lipid transporter activity,lipid transport,nutrient reservoir activity
LOC5575902	607.787	3.91402	0.250785	15.6071	6.51311e-55	1.49409e-53	AAEL012148
LOC5564109	462.719	-2.1912	0.140462	-15.5999	7.28556e-55	1.66878e-53	AAEL004096	aldo-keto reductase [Source:VB Community Annotation]			GO:0016491,GO:0055114	oxidoreductase activity,oxidation-reduction process
LOC5564592	379.892	2.21451	0.142137	15.5801	9.93688e-55	2.27265e-53	AAEL004332				GO:0005515,GO:0005929,GO:0035721	protein binding,cilium,intraciliary retrograde transport
LOC5578530	700.348	1.74183	0.111881	15.5685	1.1908e-54	2.71938e-53	AAEL019447				GO:0000398,GO:0004386,GO:0005681	mRNA splicing, via spliceosome,helicase activity,spliceosomal complex
LOC5570655	228.524	3.27011	0.2101	15.5645	1.26796e-54	2.89126e-53	AAEL008466	homeobox protein b [Source:VB Community Annotation]			GO:0000981,GO:0003677,GO:0005634,GO:0006355,GO:0006357,GO:0007275,GO:0043565	DNA-binding transcription factor activity, RNA polymerase II-specific,DNA binding,nucleus,regulation of transcription, DNA-templated,regulation of transcription by RNA polymerase II,multicellular organism development,sequence-specific DNA binding
LOC5565588	935.464	3.2553	0.209221	15.5591	1.38017e-54	3.1424e-53	AAEL004870	cytochrome P450 [Source:VB Community Annotation]	CYP18A1		GO:0004497,GO:0005506,GO:0016020,GO:0016021,GO:0016491,GO:0016705,GO:0020037,GO:0046872,GO:0055114	monooxygenase activity,iron ion binding,membrane,integral component of membrane,oxidoreductase activity,oxidoreductase activity, acting on paired donors, with incorporation or reduction of molecular oxygen,heme binding,metal ion binding,oxidation-reduction process
LOC5571557	4066.01	-1.54171	0.0990963	-15.5577	1.41128e-54	3.20845e-53	AAEL009142	prolyl endopeptidase (prolyl oligopeptidase) [Source:VB Community Annotation]			GO:0004252,GO:0006508,GO:0008236,GO:0016787,GO:0070008	serine-type endopeptidase activity,proteolysis,serine-type peptidase activity,hydrolase activity,serine-type exopeptidase activity
LOC110676811	521.382	-8.92129	0.57367	-15.5513	1.55972e-54	3.54063e-53	AAEL020578
LOC5568312	1472.08	-2.36598	0.152169	-15.5484	1.63237e-54	3.70004e-53	AAEL006752	Misexpression suppressor of ras, putative [Source:VB Community Annotation]
LOC110678056	604.57	3.51137	0.225868	15.5461	1.69105e-54	3.82734e-53	AAEL027336				GO:0016491,GO:0016620,GO:0055114	oxidoreductase activity,oxidoreductase activity, acting on the aldehyde or oxo group of donors, NAD or NADP as acceptor,oxidation-reduction process
LOC5574827	247.24	-2.74194	0.176384	-15.5453	1.71144e-54	3.86774e-53	AAEL023286				GO:0005524,GO:0006355,GO:0008134	ATP binding,regulation of transcription, DNA-templated,transcription factor binding
LOC5570686	44221.9	-1.70884	0.109933	-15.5444	1.73631e-54	3.91815e-53	AAEL008500	DEAD box ATP-dependent RNA helicase [Source:VB Community Annotation]			GO:0000166,GO:0003676,GO:0003724,GO:0004386,GO:0005524,GO:0016787	nucleotide binding,nucleic acid binding,RNA helicase activity,helicase activity,ATP binding,hydrolase activity
LOC5576001	17415.1	1.04912	0.0674941	15.5438	1.75159e-54	3.94678e-53	AAEL012243				GO:0003676,GO:0003723	nucleic acid binding,RNA binding
LOC23687479	702.443	-1.71504	0.110342	-15.5429	1.77797e-54	4.00029e-53	AAEL017059				GO:0003824	catalytic activity
LOC5571760	285.061	2.92979	0.188555	15.5381	1.91497e-54	4.30219e-53	AAEL009298	2-Keto-3-deoxy-(6-phospho-)gluconate aldolase, putative [Source:VB Community Annotation]			GO:0003824,GO:0016829	catalytic activity,lyase activity
LOC5577359	814.673	-1.74458	0.112497	-15.5078	3.07372e-54	6.89527e-53	AAEL026240				GO:0016020,GO:0016021,GO:0016746	membrane,integral component of membrane,transferase activity, transferring acyl groups
LOC5564816	3122.15	1.44954	0.0934788	15.5066	3.13118e-54	7.01385e-53	AAEL014636	rhoGTPase [Source:VB Community Annotation]			GO:0003924,GO:0005515,GO:0005525,GO:0007264	GTPase activity,protein binding,GTP binding,small GTPase mediated signal transduction
LOC5573045	206.529	4.4371	0.286186	15.5042	3.24742e-54	7.26354e-53	AAEL010221	GATA transcription factor (GATAd) [Source:VB Community Annotation]			GO:0003700,GO:0005634,GO:0006355,GO:0006357,GO:0008270,GO:0043565,GO:0046872	DNA-binding transcription factor activity,nucleus,regulation of transcription, DNA-templated,regulation of transcription by RNA polymerase II,zinc ion binding,sequence-specific DNA binding,metal ion binding
LOC5571453	3684.69	1.57875	0.101842	15.502	3.36439e-54	7.51413e-53	AAEL009074	Inhibitor of Apoptosis (IAP) containing Baculoviral IAP Repeat(s) (BIR domains). [Source:VB Community Annotation]	IAP1		GO:0046872	metal ion binding
LOC5566636	869.704	-1.78421	0.115109	-15.5002	3.45763e-54	7.71108e-53	AAEL005510	WD-repeat protein [Source:VB Community Annotation]			GO:0005515	protein binding
LOC5578735	909.386	-2.51931	0.162541	-15.4996	3.49318e-54	7.77897e-53	AAEL003647	GPCR Neurokinin/Tachykinin Family [Source:VB Community Annotation]	GPRNPR3		GO:0004930,GO:0004983,GO:0007165,GO:0007186,GO:0007218,GO:0016020,GO:0016021	G protein-coupled receptor activity,neuropeptide Y receptor activity,signal transduction,G protein-coupled receptor signaling pathway,neuropeptide signaling pathway,membrane,integral component of membrane
LOC5574506	740.933	1.74567	0.112714	15.4875	4.21152e-54	9.3587e-53	AAEL002402
LOC5572254	1560.94	-1.52802	0.0986615	-15.4875	4.21485e-54	9.3587e-53	AAEL009691	carboxylase:pyruvate/acetyl-coa/propionyl-coa [Source:VB Community Annotation]			GO:0000166,GO:0003824,GO:0004736,GO:0005524,GO:0006090,GO:0006094,GO:0009374,GO:0016874,GO:0046872	nucleotide binding,catalytic activity,pyruvate carboxylase activity,ATP binding,pyruvate metabolic process,gluconeogenesis,biotin binding,ligase activity,metal ion binding
LOC5564323	6391.09	2.78606	0.179956	15.4819	4.59994e-54	1.01989e-52	AAEL000572	AMP dependent ligase [Source:UniProtKB/TrEMBL;Acc:A0A1S4EW84]			GO:0003824,GO:0016020,GO:0016021	catalytic activity,membrane,integral component of membrane
LOC23687757	300.413	-2.77876	0.179547	-15.4765	4.99802e-54	1.10654e-52	AAEL023894				GO:0016491,GO:0055114	oxidoreductase activity,oxidation-reduction process
LOC5574375	263.651	-3.14506	0.203235	-15.475	5.11833e-54	1.13153e-52	AAEL021533				GO:0005789,GO:0016020,GO:0030314	endoplasmic reticulum membrane,membrane,junctional membrane complex
LOC5570607	387.408	3.87344	0.250443	15.4664	5.85116e-54	1.29167e-52	AAEL008421	cadherin [Source:VB Community Annotation]			GO:0005509,GO:0005886,GO:0007155,GO:0007156,GO:0016020	calcium ion binding,plasma membrane,cell adhesion,homophilic cell adhesion via plasma membrane adhesion molecules,membrane
LOC5569035	558.898	2.27287	0.146962	15.4657	5.9126e-54	1.30334e-52	AAEL026700
LOC5571066	1014.29	-1.84189	0.119167	-15.4564	6.83422e-54	1.50432e-52	AAEL008823	rac serine/threonine kinase [Source:VB Community Annotation]			GO:0000166,GO:0004672,GO:0004674,GO:0005524,GO:0006468,GO:0016301,GO:0016310,GO:0016740	nucleotide binding,protein kinase activity,protein serine/threonine kinase activity,ATP binding,protein phosphorylation,kinase activity,phosphorylation,transferase activity
LOC5576901	375.971	-2.70063	0.174862	-15.4444	8.23082e-54	1.80912e-52
LOC5574691	1192.62	1.35738	0.0879842	15.4276	1.06793e-53	2.34392e-52	AAEL011321				GO:0000775,GO:0005634,GO:0005694,GO:0007049,GO:0051301	chromosome, centromeric region,nucleus,chromosome,cell cycle,cell division
LOC5576238	722.808	-1.53059	0.0992405	-15.423	1.14634e-53	2.51239e-52	AAEL002840				GO:0005515	protein binding
LOC5579861	273.318	4.64457	0.301168	15.4219	1.16672e-53	2.55337e-52	AAEL005979	Class B Scavenger Receptor (CD36 domain). [Source:VB Community Annotation]	SCRB3		GO:0005886,GO:0016020,GO:0016021	plasma membrane,membrane,integral component of membrane
LOC5573325	612.036	-1.97699	0.128241	-15.4161	1.27483e-53	2.78598e-52	AAEL010412
LOC5564012	508.647	-1.92948	0.125172	-15.4146	1.30552e-53	2.84895e-52	AAEL014275	molybdopterin cofactor sulfurase (mosc) [Source:VB Community Annotation]			GO:0003824,GO:0030151,GO:0030170	catalytic activity,molybdenum ion binding,pyridoxal phosphate binding
LOC110677056	372.11	-2.37503	0.15412	-15.4102	1.39684e-53	3.04388e-52	AAEL024274
LOC5572588	935.251	-1.59163	0.10329	-15.4093	1.418e-53	3.08556e-52	AAEL009916				GO:0003676,GO:0005634,GO:0008270,GO:0046872	nucleic acid binding,nucleus,zinc ion binding,metal ion binding
LOC5569846	160.258	-3.68692	0.239393	-15.4012	1.60748e-53	3.49288e-52	AAEL018149				GO:0004970,GO:0005216,GO:0005886,GO:0006811,GO:0015276,GO:0016020,GO:0016021,GO:0030054,GO:0034220,GO:0035235,GO:0038023,GO:0045202,GO:0045211	ionotropic glutamate receptor activity,ion channel activity,plasma membrane,ion transport,ligand-gated ion channel activity,membrane,integral component of membrane,cell junction,ion transmembrane transport,ionotropic glutamate receptor signaling pathway,signaling receptor activity,synapse,postsynaptic membrane
LOC5566116	1120.12	-1.73507	0.11266	-15.401	1.61131e-53	3.49622e-52	AAEL005174
LOC5577652	221.006	4.35584	0.282953	15.3942	1.78925e-53	3.8768e-52	AAEL003262	leucine-rich transmembrane protein [Source:VB Community Annotation]			GO:0005515,GO:0016020,GO:0016021	protein binding,membrane,integral component of membrane
LOC5563948	747.923	-1.77716	0.115512	-15.385	2.06313e-53	4.46387e-52	AAEL021054				GO:0004445,GO:0016311,GO:0046856	inositol-polyphosphate 5-phosphatase activity,dephosphorylation,phosphatidylinositol dephosphorylation
LOC23687573	1139.24	1.63494	0.106275	15.3841	2.09266e-53	4.52133e-52	AAEL028188				GO:0004869,GO:0006508,GO:0008233,GO:0008234,GO:0010951,GO:0016787	cysteine-type endopeptidase inhibitor activity,proteolysis,peptidase activity,cysteine-type peptidase activity,negative regulation of endopeptidase activity,hydrolase activity
LOC5569110	1956.04	2.0602	0.13393	15.3827	2.13997e-53	4.617e-52	AAEL007374	yellow protein precursor, putative [Source:VB Community Annotation]
LOC5569953	220.258	-3.37134	0.219268	-15.3754	2.39199e-53	5.15278e-52	AAEL008049				GO:0003677,GO:0005634	DNA binding,nucleus
LOC5579887	664.281	-1.7666	0.114898	-15.3754	2.39507e-53	5.15278e-52	AAEL001024	mitochondrial carrier protein [Source:VB Community Annotation]			GO:0016020,GO:0016021,GO:0022857	membrane,integral component of membrane,transmembrane transporter activity
LOC5578361	198.647	-3.23662	0.210666	-15.3638	2.86448e-53	6.15399e-52	AAEL003550	aquaporin [Source:VB Community Annotation]			GO:0015267,GO:0016020,GO:0016021,GO:0055085	channel activity,membrane,integral component of membrane,transmembrane transport
LOC110680452	1459.9	1.39547	0.090831	15.3633	2.88367e-53	6.18649e-52	AAEL024321				GO:0003677,GO:0005515,GO:0016514,GO:0071564,GO:0071565	DNA binding,protein binding,SWI/SNF complex,npBAF complex,nBAF complex
LOC5573339	1689.43	-1.61502	0.105125	-15.3629	2.90508e-53	6.22366e-52	AAEL010437	Heparan n-sulfatase [Source:UniProtKB/TrEMBL;Acc:A0A1S4FQA7]			GO:0003824,GO:0008484,GO:0016787	catalytic activity,sulfuric ester hydrolase activity,hydrolase activity
LOC5568947	316.234	4.18535	0.272569	15.3552	3.26856e-53	6.99252e-52	AAEL007233	zinc finger protein [Source:VB Community Annotation]			GO:0003676	nucleic acid binding
LOC5575625	3161.78	1.46159	0.0952091	15.3514	3.46729e-53	7.40726e-52	AAEL011949	transferrin [Source:VB Community Annotation]	Tf2		GO:0005576,GO:0005615,GO:0016020,GO:0016021	extracellular region,extracellular space,membrane,integral component of membrane
LOC5570852	541.35	4.47697	0.29175	15.3452	3.81122e-53	8.13061e-52	AAEL008632	ABC transporter [Source:VB Community Annotation]			GO:0000166,GO:0005524,GO:0016020,GO:0016021,GO:0016887,GO:0042626	nucleotide binding,ATP binding,membrane,integral component of membrane,ATPase activity,ATPase-coupled transmembrane transporter activity
LOC5569984	19832.7	3.07297	0.200339	15.3388	4.20636e-53	8.96101e-52	AAEL008073				GO:0003723	RNA binding
LOC5569649	5398.45	1.74097	0.113544	15.3329	4.60645e-53	9.79964e-52	AAEL007803	lamin b receptor [Source:VB Community Annotation]			GO:0016020,GO:0016021,GO:0016126,GO:0016628,GO:0055114	membrane,integral component of membrane,sterol biosynthetic process,oxidoreductase activity, acting on the CH-CH group of donors, NAD or NADP as acceptor,oxidation-reduction process
LOC5567519	203.703	-3.87909	0.253176	-15.3217	5.47966e-53	1.1641e-51	AAEL006146
LOC5578126	20401.1	-2.75106	0.179922	-15.2903	8.8782e-53	1.88346e-51	AAEL020073				GO:0003723,GO:0005515,GO:0006355,GO:0006417,GO:0017148,GO:0030371,GO:0043488	RNA binding,protein binding,regulation of transcription, DNA-templated,regulation of translation,negative regulation of translation,translation repressor activity,regulation of mRNA stability
LOC5568916	2897.15	-1.60091	0.104743	-15.2841	9.75864e-53	2.06737e-51	AAEL019536				GO:0004177,GO:0006508,GO:0008233,GO:0008237,GO:0008270,GO:0016787,GO:0046872	aminopeptidase activity,proteolysis,peptidase activity,metallopeptidase activity,zinc ion binding,hydrolase activity,metal ion binding
LOC5572113	1110.29	1.48401	0.097108	15.2821	1.00713e-52	2.13065e-51	AAEL009538				GO:0005576	extracellular region
LOC5571718	1749.17	-1.9315	0.126414	-15.2792	1.05251e-52	2.22355e-51	AAEL009235				GO:0003676	nucleic acid binding
LOC5565070	239.096	-2.70846	0.177302	-15.276	1.10571e-52	2.3327e-51	AAEL004577	pmp22 peroxisomal membrane protein, putative [Source:VB Community Annotation]			GO:0016020,GO:0016021	membrane,integral component of membrane
LOC5579065	1081.11	-1.9001	0.124415	-15.2723	1.17026e-52	2.46547e-51	AAEL014003				GO:0005515	protein binding
LOC5569480	247.884	-3.91962	0.256702	-15.2691	1.22837e-52	2.58432e-51	AAEL007664	nicotinic acetylcholine receptor subunit [Source:VB Community Annotation]			GO:0004888,GO:0005216,GO:0005230,GO:0005886,GO:0006811,GO:0016020,GO:0016021,GO:0022848,GO:0030054,GO:0034220,GO:0045202,GO:0045211,GO:0060078,GO:0060079	transmembrane signaling receptor activity,ion channel activity,extracellular ligand-gated ion channel activity,plasma membrane,ion transport,membrane,integral component of membrane,acetylcholine-gated cation-selective channel activity,cell junction,ion transmembrane transport,synapse,postsynaptic membrane,regulation of postsynaptic membrane potential,excitatory postsynaptic potential
LOC5568888	1134.59	-1.56912	0.102769	-15.2684	1.24258e-52	2.61062e-51	AAEL007196
LOC5578261	2365.05	-2.03099	0.133029	-15.2673	1.26373e-52	2.65139e-51	AAEL003494	goodpasture antigen-binding protein [Source:VB Community Annotation]			GO:0008289	lipid binding
LOC5567623	795.882	-1.71707	0.11248	-15.2656	1.29602e-52	2.71539e-51	AAEL006226	sam/hd domain protein [Source:VB Community Annotation]
LOC5570601	213.454	-3.1433	0.206021	-15.2572	1.47464e-52	3.0854e-51	AAEL008415				GO:0003676,GO:0005634,GO:0006397,GO:0008380	nucleic acid binding,nucleus,mRNA processing,RNA splicing
LOC5564787	556.141	-2.12122	0.139058	-15.2541	1.54503e-52	3.22758e-51	AAEL004435	kynurenine aminotransferase [Source:VB Community Annotation]			GO:0003824,GO:0006520,GO:0008483,GO:0009058,GO:0016212,GO:0016740,GO:0030170,GO:0036137,GO:0047315,GO:0047804,GO:0070189,GO:0097052	catalytic activity,cellular amino acid metabolic process,transaminase activity,biosynthetic process,kynurenine-oxoglutarate transaminase activity,transferase activity,pyridoxal phosphate binding,kynurenine aminotransferase activity,kynurenine-glyoxylate transaminase activity,cysteine-S-conjugate beta-lyase activity,kynurenine metabolic process,L-kynurenine metabolic process
LOC5579820	1182.4	1.61434	0.10583	15.2541	1.54683e-52	3.22758e-51	AAEL005524	Adenosylhomocysteinase [Source:UniProtKB/TrEMBL;Acc:Q179S1]			GO:0004013,GO:0006730,GO:0016787	adenosylhomocysteinase activity,one-carbon metabolic process,hydrolase activity
LOC5574999	201.546	5.88455	0.385869	15.2501	1.64299e-52	3.42354e-51	AAEL002520	apolipoprotein D, putative [Source:VB Community Annotation]			GO:0009507,GO:0046422,GO:0055114	chloroplast,violaxanthin de-epoxidase activity,oxidation-reduction process
LOC5570647	141.631	-5.11752	0.335658	-15.2462	1.74463e-52	3.63036e-51	AAEL026107
LOC5565922	4847.84	-1.27514	0.0836505	-15.2437	1.81361e-52	3.76874e-51	AAEL000709	protein cactus (TOLL pathway signalling) [Source:VB Community Annotation]	cact		GO:0005515	protein binding
LOC5578348	2082.67	-2.06347	0.135479	-15.2309	2.20556e-52	4.57699e-51	AAEL003548	sulphate transporter [Source:VB Community Annotation]			GO:0008271,GO:0008272,GO:0015116,GO:0016020,GO:0016021,GO:0055085,GO:1902358	secondary active sulfate transmembrane transporter activity,sulfate transport,sulfate transmembrane transporter activity,membrane,integral component of membrane,transmembrane transport,sulfate transmembrane transport
LOC5569929	449.972	-2.36	0.15496	-15.2297	2.24655e-52	4.65571e-51	AAEL008029	Ras-related protein, putative [Source:UniProtKB/TrEMBL;Acc:A0A1S4FIJ0]			GO:0003924,GO:0005525,GO:0016020,GO:0016021	GTPase activity,GTP binding,membrane,integral component of membrane
LOC5576601	334.647	2.23559	0.146819	15.2269	2.34416e-52	4.85139e-51	AAEL002943	che-11 [Source:VB Community Annotation]			GO:0005515	protein binding
LOC5570453	698.037	3.17072	0.208257	15.225	2.41287e-52	4.98682e-51	AAEL008346	achaete-scute complex protein T3, putative [Source:VB Community Annotation]			GO:0003677,GO:0003700,GO:0006357,GO:0046983	DNA binding,DNA-binding transcription factor activity,regulation of transcription by RNA polymerase II,protein dimerization activity
LOC5572395	1177.94	-2.09231	0.137492	-15.2176	2.7006e-52	5.57392e-51	AAEL026010				GO:0031929,GO:0031932	TOR signaling,TORC2 complex
LOC5578529	167.267	-3.31403	0.217807	-15.2154	2.79483e-52	5.7606e-51	AAEL024782
LOC5565761	3314.15	-1.64208	0.107956	-15.2107	3.004e-52	6.18337e-51	AAEL004980	Ubiquitinyl hydrolase 1 [Source:UniProtKB/TrEMBL;Acc:Q17BE1]			GO:0004843,GO:0006508,GO:0006511,GO:0008233,GO:0008234,GO:0008270,GO:0016579,GO:0016787,GO:0036459,GO:0046872	thiol-dependent ubiquitin-specific protease activity,proteolysis,ubiquitin-dependent protein catabolic process,peptidase activity,cysteine-type peptidase activity,zinc ion binding,protein deubiquitination,hydrolase activity,thiol-dependent ubiquitinyl hydrolase activity,metal ion binding
LOC5574744	395.339	2.09752	0.137934	15.2067	3.19414e-52	6.56587e-51	AAEL011386
LOC5566514	371.677	2.46767	0.162279	15.2063	3.20948e-52	6.58851e-51	AAEL005460	alpha-galactosidase/alpha-n-acetylgalactosaminidase [Source:VB Community Annotation]			GO:0003824,GO:0004553,GO:0005975,GO:0008152,GO:0016787,GO:0016798	catalytic activity,hydrolase activity, hydrolyzing O-glycosyl compounds,carbohydrate metabolic process,metabolic process,hydrolase activity,hydrolase activity, acting on glycosyl bonds
LOC5569595	1172.56	-2.36531	0.15555	-15.2061	3.21948e-52	6.60015e-51	AAEL001245	heterogeneous nuclear ribonucleoprotein [Source:VB Community Annotation]			GO:0003676,GO:0003723	nucleic acid binding,RNA binding
LOC5566485	2154.91	-1.9795	0.130197	-15.2039	3.33104e-52	6.81968e-51	AAEL005422	pyrroline-5-carboxylate dehydrogenase [Source:VB Community Annotation]			GO:0003842,GO:0006560,GO:0010133,GO:0016491,GO:0016620,GO:0055114	1-pyrroline-5-carboxylate dehydrogenase activity,proline metabolic process,proline catabolic process to glutamate,oxidoreductase activity,oxidoreductase activity, acting on the aldehyde or oxo group of donors, NAD or NADP as acceptor,oxidation-reduction process
LOC5573431	3003.21	2.11087	0.138868	15.2006	3.5066e-52	7.16947e-51	AAEL026825				GO:0016020,GO:0016021,GO:0022857,GO:0055085	membrane,integral component of membrane,transmembrane transporter activity,transmembrane transport
LOC5570355	1137.93	3.7771	0.248534	15.1975	3.67256e-52	7.49872e-51	AAEL001368	kek1 [Source:VB Community Annotation]			GO:0005515,GO:0016020,GO:0016021	protein binding,membrane,integral component of membrane
LOC5570551	504.489	1.81856	0.119697	15.193	3.93787e-52	8.02968e-51	AAEL019683				GO:0003824,GO:0005783,GO:0005794,GO:0005795,GO:0008484,GO:0009986,GO:0016787	catalytic activity,endoplasmic reticulum,Golgi apparatus,Golgi stack,sulfuric ester hydrolase activity,cell surface,hydrolase activity
LOC5578775	1110.11	1.51025	0.0994097	15.1922	3.9826e-52	8.11001e-51	AAEL003651				GO:0003824,GO:0016020,GO:0016021	catalytic activity,membrane,integral component of membrane
LOC5571677	216.089	-2.89998	0.190893	-15.1917	4.01631e-52	8.16775e-51	AAEL001656	sodium-dependent phosphate transporter [Source:VB Community Annotation]			GO:0016020,GO:0016021,GO:0022857,GO:0055085	membrane,integral component of membrane,transmembrane transporter activity,transmembrane transport
LOC110681035	446.927	3.1903	0.210072	15.1867	4.33066e-52	8.79529e-51	AAEL026808
LOC5564068	307.295	3.63268	0.239516	15.1668	5.86854e-52	1.19027e-50	AAEL025030				GO:0004806,GO:0005576,GO:0006629,GO:0052689	triglyceride lipase activity,extracellular region,lipid metabolic process,carboxylic ester hydrolase activity
LOC5565885	953.413	3.39017	0.223659	15.1578	6.73048e-52	1.36328e-50	AAEL000717	protocadherin [Source:VB Community Annotation]			GO:0005509,GO:0005886,GO:0007155,GO:0007156,GO:0016020	calcium ion binding,plasma membrane,cell adhesion,homophilic cell adhesion via plasma membrane adhesion molecules,membrane
LOC5576406	6691.7	-1.39345	0.0919414	-15.1558	6.93504e-52	1.40285e-50	AAEL012499	Histone H2A [Source:UniProtKB/TrEMBL;Acc:Q16LW9]			GO:0000786,GO:0003677,GO:0005634,GO:0005694,GO:0046982	nucleosome,DNA binding,nucleus,chromosome,protein heterodimerization activity
LOC5575748	4149.52	-2.22642	0.14708	-15.1375	9.16194e-52	1.85086e-50	AAEL012057	enhancer of polycomb [Source:VB Community Annotation]			GO:0005634,GO:0006357,GO:0032777,GO:0035267	nucleus,regulation of transcription by RNA polymerase II,Piccolo NuA4 histone acetyltransferase complex,NuA4 histone acetyltransferase complex
LOC5579971	305.887	-2.4018	0.15869	-15.1352	9.49344e-52	1.91529e-50	AAEL026089
LOC5575389	730.659	-1.65573	0.109482	-15.1233	1.13613e-51	2.28909e-50	AAEL011788				GO:0004519,GO:0005515,GO:0090305	endonuclease activity,protein binding,nucleic acid phosphodiester bond hydrolysis
LOC5570910	181.761	3.54694	0.234757	15.109	1.4136e-51	2.84438e-50	AAEL018240				GO:0016020,GO:0016021	membrane,integral component of membrane
LOC5572982	765.565	-1.62104	0.107307	-15.1066	1.46567e-51	2.94525e-50	AAEL001930	pra1 protein [Source:VB Community Annotation]			GO:0016020,GO:0016021	membrane,integral component of membrane
LOC23687409	346.65	-2.69845	0.178724	-15.0984	1.65988e-51	3.33114e-50	AAEL016989
LOC5574656	704.449	-1.63294	0.108155	-15.0981	1.66651e-51	3.34005e-50	AAEL011295
LOC5574419	1085.38	-2.27528	0.150796	-15.0885	1.92909e-51	3.86121e-50	AAEL018212	Ubiquitinyl hydrolase 1 [Source:UniProtKB/TrEMBL;Acc:A0A1S4G7V5]			GO:0004843,GO:0006511,GO:0008270,GO:0016579,GO:0036459,GO:0046872	thiol-dependent ubiquitin-specific protease activity,ubiquitin-dependent protein catabolic process,zinc ion binding,protein deubiquitination,thiol-dependent ubiquitinyl hydrolase activity,metal ion binding
LOC5566481	9529.22	-2.18127	0.144585	-15.0864	1.98907e-51	3.97605e-50	AAEL028211				GO:0003676,GO:0003779,GO:0005515,GO:0005524	nucleic acid binding,actin binding,protein binding,ATP binding
LOC5579159	809.643	1.8667	0.123767	15.0824	2.11348e-51	4.21921e-50	AAEL014032				GO:0003677,GO:0003700,GO:0006355,GO:0043565	DNA binding,DNA-binding transcription factor activity,regulation of transcription, DNA-templated,sequence-specific DNA binding
LOC5567284	619.434	3.21808	0.213533	15.0706	2.52729e-51	5.0387e-50	AAEL021583
LOC5574367	1974.11	-2.28886	0.151907	-15.0675	2.65126e-51	5.27896e-50	AAEL011085				GO:0008270	zinc ion binding
LOC5565896	200.377	4.03515	0.267819	15.0667	2.68058e-51	5.33037e-50	AAEL000687	glucosyl/glucuronosyl transferases [Source:VB Community Annotation]			GO:0008194,GO:0015020,GO:0016020,GO:0016021,GO:0016740,GO:0016757,GO:0016758	UDP-glycosyltransferase activity,glucuronosyltransferase activity,membrane,integral component of membrane,transferase activity,transferase activity, transferring glycosyl groups,transferase activity, transferring hexosyl groups
LOC5577415	2172.73	-2.82092	0.187368	-15.0555	3.17764e-51	6.31053e-50	AAEL003162	formin 1,2/cappuccino [Source:VB Community Annotation]			GO:0005884,GO:0008017,GO:0045010	actin filament,microtubule binding,actin nucleation
LOC5578673	4428.74	-2.64377	0.175678	-15.049	3.5067e-51	6.95495e-50	AAEL003624	sodium/chloride dependent amino acid transporter [Source:VB Community Annotation]			GO:0005328,GO:0015293,GO:0016020,GO:0016021,GO:0055085	,symporter activity,membrane,integral component of membrane,transmembrane transport
LOC5567497	243.543	3.31615	0.220669	15.0277	4.83452e-51	9.576e-50	AAEL000953
LOC110676984	161.956	4.78366	0.318369	15.0255	4.99568e-51	9.88237e-50	AAEL010348	sugar transporter [Source:VB Community Annotation]			GO:0016020,GO:0016021,GO:0022857,GO:0055085	membrane,integral component of membrane,transmembrane transporter activity,transmembrane transport
LOC5568829	823.987	-1.64308	0.109387	-15.0208	5.36753e-51	1.06042e-49	AAEL001175	DNA photolyase [Source:VB Community Annotation]
LOC5568858	1730.85	-2.58002	0.171782	-15.0192	5.4971e-51	1.08461e-49	AAEL007171	Protein phosphatase 2c [Source:UniProtKB/TrEMBL;Acc:A0A1S4FFR8]			GO:0003824,GO:0004721,GO:0004722,GO:0006470,GO:0016787,GO:0016791,GO:0043169,GO:0046872	catalytic activity,phosphoprotein phosphatase activity,protein serine/threonine phosphatase activity,protein dephosphorylation,hydrolase activity,phosphatase activity,cation binding,metal ion binding
LOC110677038	161.684	-3.65193	0.243168	-15.0181	5.58638e-51	1.1008e-49	AAEL024275
LOC5569462	896.774	-2.07354	0.138365	-14.986	9.06462e-51	1.78388e-49	AAEL027751				GO:0005524,GO:0006464	ATP binding,cellular protein modification process
LOC5564066	293.809	2.65697	0.177306	14.9852	9.17164e-51	1.80261e-49	AAEL026169				GO:0046872	metal ion binding
LOC5564672	374.38	3.10519	0.207219	14.9851	9.18783e-51	1.80347e-49	AAEL014556				GO:0006144,GO:0016829,GO:0016831,GO:0019428,GO:0019628	purine nucleobase metabolic process,lyase activity,carboxy-lyase activity,allantoin biosynthetic process,urate catabolic process
LOC5577128	1341.53	-1.82323	0.121757	-14.9744	1.08003e-50	2.11725e-49	AAEL013025				GO:0003723,GO:0003724,GO:0004386,GO:0005737,GO:0032574,GO:0032575,GO:0035194	RNA binding,RNA helicase activity,helicase activity,cytoplasm,5'-3' RNA helicase activity,GO_0032575,post-transcriptional gene silencing by RNA
LOC5567305	1092.17	-2.58517	0.17273	-14.9666	1.21422e-50	2.37726e-49	AAEL005956	caspase (short) [Source:VB Community Annotation]	CASPS16		GO:0004197,GO:0006508,GO:0006915,GO:0008234	cysteine-type endopeptidase activity,proteolysis,apoptotic process,cysteine-type peptidase activity
LOC5564130	648.206	-2.14629	0.143451	-14.9618	1.30412e-50	2.54998e-49	AAEL004102	aldo-keto reductase [Source:VB Community Annotation]			GO:0016491,GO:0055114	oxidoreductase activity,oxidation-reduction process
LOC5569928	170.462	3.53927	0.236624	14.9573	1.39506e-50	2.7243e-49	AAEL008031	carbonic anhydrase [Source:VB Community Annotation]			GO:0004089,GO:0008270	carbonate dehydratase activity,zinc ion binding
LOC5568062	238.811	3.17121	0.212024	14.9569	1.40521e-50	2.74061e-49	AAEL006482	sugar transporter [Source:VB Community Annotation]			GO:0016020,GO:0016021,GO:0022857,GO:0055085	membrane,integral component of membrane,transmembrane transporter activity,transmembrane transport
LOC5569552	652.569	-1.70359	0.113918	-14.9546	1.45458e-50	2.83326e-49	AAEL019980				GO:0016020	membrane
LOC5567979	1048.43	-2.46109	0.164634	-14.9489	1.58457e-50	3.08253e-49	AAEL006412	sodium- and chloride-dependent neurotransmitter transporter [Source:VB Community Annotation]			GO:0005034,GO:0005328,GO:0006836,GO:0015293,GO:0016020,GO:0016021,GO:0019226,GO:0042065,GO:0055085	osmosensor activity,,neurotransmitter transport,symporter activity,membrane,integral component of membrane,transmission of nerve impulse,glial cell growth,transmembrane transport
LOC5567173	3377.9	-1.77369	0.118681	-14.945	1.67991e-50	3.26382e-49	AAEL019532				GO:0005515,GO:0005516,GO:0016020	protein binding,calmodulin binding,membrane
LOC5576555	10785.5	1.92807	0.129073	14.9378	1.86971e-50	3.62794e-49	AAEL012616	NADP transhydrogenase [Source:VB Community Annotation]			GO:0008746,GO:0016020,GO:0016021,GO:0016491,GO:0055114,GO:1902600	NAD(P)+ transhydrogenase activity,membrane,integral component of membrane,oxidoreductase activity,oxidation-reduction process,proton transmembrane transport
LOC5578565	578.003	-2.8371	0.189997	-14.9323	2.0302e-50	3.93436e-49	AAEL013752	Rfx5 [Source:UniProtKB/TrEMBL;Acc:A0A1S4G0A6]			GO:0003677,GO:0003700,GO:0006355	DNA binding,DNA-binding transcription factor activity,regulation of transcription, DNA-templated
LOC5569745	13855.3	1.13265	0.0758628	14.9303	2.0947e-50	4.05419e-49	AAEL007883	fk506-binding protein [Source:VB Community Annotation]			GO:0000413,GO:0003755,GO:0016853	protein peptidyl-prolyl isomerization,peptidyl-prolyl cis-trans isomerase activity,isomerase activity
LOC5567268	282.514	-2.60958	0.174869	-14.923	2.33364e-50	4.51091e-49	AAEL005936				GO:0004862,GO:0006469,GO:2000480	cAMP-dependent protein kinase inhibitor activity,negative regulation of protein kinase activity,negative regulation of cAMP-dependent protein kinase activity
LOC5565996	221.055	-2.96573	0.198836	-14.9154	2.61551e-50	5.04935e-49	AAEL015042				GO:0000795,GO:0007131,GO:0019789,GO:0046872	synaptonemal complex,reciprocal meiotic recombination,SUMO transferase activity,metal ion binding
LOC5567582	603.159	3.06934	0.205827	14.9122	2.74669e-50	5.29589e-49	AAEL006181	amidase [Source:VB Community Annotation]			GO:0005739,GO:0016020,GO:0016021	mitochondrion,membrane,integral component of membrane
LOC5571504	585.667	-1.89714	0.127252	-14.9085	2.90004e-50	5.58449e-49	AAEL001600				GO:0003676,GO:0003677	nucleic acid binding,DNA binding
LOC5572535	273.813	4.29381	0.288088	14.9045	3.08132e-50	5.92609e-49	AAEL009864	Putative conserved secreted protein [Source:UniProtKB/TrEMBL;Acc:A0A0P6IY40]			GO:0016020,GO:0016021	membrane,integral component of membrane
LOC5570134	266.858	2.83084	0.189969	14.9016	3.21944e-50	6.18392e-49	AAEL008099	Procollagen-lysine,2-oxoglutarate 5-dioxygenase [Source:UniProtKB/TrEMBL;Acc:A0A1S4FIM3]			GO:0005506,GO:0008475,GO:0016491,GO:0016705,GO:0031418,GO:0046872,GO:0051213,GO:0055114	iron ion binding,procollagen-lysine 5-dioxygenase activity,oxidoreductase activity,oxidoreductase activity, acting on paired donors, with incorporation or reduction of molecular oxygen,L-ascorbic acid binding,metal ion binding,dioxygenase activity,oxidation-reduction process
LOC5564683	26629	-2.80785	0.188433	-14.901	3.24673e-50	6.22849e-49	AAEL004388	heme peroxidase [Source:VB Community Annotation]	HPX8A		GO:0004601,GO:0006979,GO:0020037,GO:0048477,GO:0055114,GO:0098869	peroxidase activity,response to oxidative stress,heme binding,oogenesis,oxidation-reduction process,cellular oxidant detoxification
LOC5574871	7182.44	-1.99772	0.134104	-14.8969	3.45348e-50	6.61677e-49	AAEL011470	cis,cis-muconate transport protein MucK, putative [Source:VB Community Annotation]			GO:0016020,GO:0016021,GO:0022857,GO:0055085	membrane,integral component of membrane,transmembrane transporter activity,transmembrane transport
LOC5566442	3339.78	1.30053	0.0873297	14.8921	3.70711e-50	7.0938e-49	AAEL005384	phosphoribosylformylglycinamidine synthase, putative [Source:VB Community Annotation]			GO:0000166,GO:0004642,GO:0005524,GO:0006164,GO:0006189,GO:0006541,GO:0016874,GO:0046872	nucleotide binding,phosphoribosylformylglycinamidine synthase activity,ATP binding,purine nucleotide biosynthetic process,'de novo' IMP biosynthetic process,glutamine metabolic process,ligase activity,metal ion binding
LOC5564587	12646.1	3.30907	0.222214	14.8913	3.75209e-50	7.17088e-49	AAEL004344	zinc finger protein [Source:VB Community Annotation]			GO:0003676	nucleic acid binding
LOC5566454	465.681	-1.8939	0.127215	-14.8874	3.98021e-50	7.59731e-49	AAEL014176	cornichon [Source:VB Community Annotation]
LOC5565780	340.206	-2.10745	0.141578	-14.8854	4.09831e-50	7.81295e-49	AAEL004970				GO:0000166,GO:0004371,GO:0005524,GO:0006071,GO:0016301,GO:0016310,GO:0016740,GO:0034012	nucleotide binding,glycerone kinase activity,ATP binding,glycerol metabolic process,kinase activity,phosphorylation,transferase activity,FAD-AMP lyase (cyclizing) activity
LOC5564312	451.476	-1.94971	0.131046	-14.8781	4.57393e-50	8.70876e-49	AAEL000593	mitochondrial 18 kda protein (mtp18) [Source:VB Community Annotation]
LOC5572615	189.776	4.90895	0.330028	14.8743	4.83756e-50	9.19922e-49	AAEL025694				GO:0000981,GO:0003677,GO:0005634,GO:0006355,GO:0006357,GO:0007275,GO:0043565	DNA-binding transcription factor activity, RNA polymerase II-specific,DNA binding,nucleus,regulation of transcription, DNA-templated,regulation of transcription by RNA polymerase II,multicellular organism development,sequence-specific DNA binding
LOC5565537	1630.6	-1.60611	0.108028	-14.8675	5.35373e-50	1.01681e-48	AAEL004853	glycerol kinase [Source:VB Community Annotation]			GO:0000166,GO:0004370,GO:0005524,GO:0005975,GO:0006071,GO:0006072,GO:0016301,GO:0016310,GO:0016740,GO:0016773,GO:0019563	nucleotide binding,glycerol kinase activity,ATP binding,carbohydrate metabolic process,glycerol metabolic process,glycerol-3-phosphate metabolic process,kinase activity,phosphorylation,transferase activity,phosphotransferase activity, alcohol group as acceptor,glycerol catabolic process
LOC5576295	1072.41	3.36962	0.22673	14.8618	5.83177e-50	1.10622e-48	AAEL012449	myosin x [Source:VB Community Annotation]			GO:0000166,GO:0003774,GO:0003779,GO:0005515,GO:0005524,GO:0016459	nucleotide binding,motor activity,actin binding,protein binding,ATP binding,myosin complex
LOC5578710	1464.25	-2.83489	0.190795	-14.8583	6.1437e-50	1.16394e-48	AAEL013823	calcium/calmodulin dependent protein kinase ii [Source:VB Community Annotation]			GO:0000166,GO:0004672,GO:0004674,GO:0004683,GO:0005516,GO:0005524,GO:0006468,GO:0016020,GO:0016021,GO:0016301,GO:0016310	nucleotide binding,protein kinase activity,protein serine/threonine kinase activity,calmodulin-dependent protein kinase activity,calmodulin binding,ATP binding,protein phosphorylation,membrane,integral component of membrane,kinase activity,phosphorylation
LOC5574404	38655	1.77072	0.119257	14.8479	7.18219e-50	1.35899e-48	AAEL011116	14-3-3 protein sigma, gamma, zeta, beta/alpha [Source:UniProtKB/TrEMBL;Acc:Q16QZ7]			GO:0019904	protein domain specific binding
LOC5575334	1086.34	-1.96548	0.13239	-14.8461	7.37858e-50	1.39442e-48	AAEL002593	serine protease [Source:VB Community Annotation]			GO:0004252,GO:0006508	serine-type endopeptidase activity,proteolysis
LOC5568814	669.117	-1.88707	0.127148	-14.8415	7.89922e-50	1.49097e-48	AAEL001194	fatty acid synthase [Source:VB Community Annotation]	FAS1		GO:0003824,GO:0004312,GO:0004313,GO:0004314,GO:0004315,GO:0004316,GO:0004317,GO:0004320,GO:0006631,GO:0006633,GO:0008152,GO:0008659,GO:0008693,GO:0009058,GO:0016295,GO:0016296,GO:0016297,GO:0016418,GO:0016419,GO:0016491,GO:0016740,GO:0016746,GO:0016788,GO:0016829,GO:0019171,GO:0031177,GO:0047117,GO:0047451,GO:0055114,GO:0102131,GO:0102132	catalytic activity,fatty acid synthase activity,[acyl-carrier-protein] S-acetyltransferase activity,[acyl-carrier-protein] S-malonyltransferase activity,3-oxoacyl-[acyl-carrier-protein] synthase activity,3-oxoacyl-[acyl-carrier-protein] reductase (NADPH) activity,3-hydroxypalmitoyl-[acyl-carrier-protein] dehydratase activity,oleoyl-[acyl-carrier-protein] hydrolase activity,fatty acid metabolic pr…
LOC5578475	169.425	3.97884	0.268197	14.8355	8.63834e-50	1.62846e-48	AAEL000508	fibrinogen and fibronectin [Source:VB Community Annotation]
LOC5569408	476.574	1.87711	0.12664	14.8224	1.04919e-49	1.97543e-48	AAEL007619	Toll-like receptor [Source:VB Community Annotation]	TOLL5A		GO:0002224,GO:0004888,GO:0005515,GO:0006955,GO:0007165,GO:0016020,GO:0016021	toll-like receptor signaling pathway,transmembrane signaling receptor activity,protein binding,immune response,signal transduction,membrane,integral component of membrane
LOC5565054	377.632	-1.89272	0.127711	-14.8204	1.08139e-49	2.03355e-48	AAEL004562	DNA polymerase eta [Source:VB Community Annotation]			GO:0003684,GO:0005634,GO:0006281	damaged DNA binding,nucleus,DNA repair
LOC5567989	323.973	-2.19107	0.14785	-14.8195	1.09627e-49	2.05898e-48	AAEL006445	Phosphatidylinositol-glycan biosynthesis class W protein [Source:UniProtKB/TrEMBL;Acc:Q176D1]			GO:0005783,GO:0005789,GO:0006506,GO:0016020,GO:0016021,GO:0016740,GO:0016746	endoplasmic reticulum,endoplasmic reticulum membrane,GPI anchor biosynthetic process,membrane,integral component of membrane,transferase activity,transferase activity, transferring acyl groups
LOC5574326	959.019	-1.75518	0.118469	-14.8154	1.16417e-49	2.18383e-48	AAEL018057				GO:0004672,GO:0005524,GO:0006468	protein kinase activity,ATP binding,protein phosphorylation
LOC5569655	1659.6	-2.13591	0.144236	-14.8085	1.29073e-49	2.41825e-48	AAEL007805
LOC5564412	161.131	3.37878	0.228176	14.8078	1.30446e-49	2.44098e-48	AAEL014422	syntrophin [Source:VB Community Annotation]			GO:0005198,GO:0005515,GO:0005856	structural molecule activity,protein binding,cytoskeleton
LOC5577902	1135.88	-1.49151	0.100819	-14.7939	1.60303e-49	2.99599e-48	AAEL026782				GO:0016020,GO:0016021,GO:0017112,GO:0031410	membrane,integral component of membrane,Rab guanyl-nucleotide exchange factor activity,cytoplasmic vesicle
LOC5569651	2413.52	-1.58997	0.107558	-14.7825	1.9011e-49	3.54872e-48	AAEL007813				GO:0003676	nucleic acid binding
LOC5570959	840.813	-1.6582	0.112189	-14.7804	1.96034e-49	3.65483e-48	AAEL008696	smad [Source:VB Community Annotation]			GO:0003677,GO:0003700,GO:0005515,GO:0005634,GO:0005667,GO:0005737,GO:0006355,GO:0007179,GO:0046872	DNA binding,DNA-binding transcription factor activity,protein binding,nucleus,transcription regulator complex,cytoplasm,regulation of transcription, DNA-templated,transforming growth factor beta receptor signaling pathway,metal ion binding
LOC5575917	153.638	4.47627	0.303043	14.7711	2.25164e-49	4.19279e-48	AAEL027424				GO:0000166,GO:0005524,GO:0016020,GO:0016021,GO:0016887	nucleotide binding,ATP binding,membrane,integral component of membrane,ATPase activity
LOC110680731	150.096	4.12919	0.28015	14.7392	3.60922e-49	6.71252e-48	AAEL023956
LOC5574220	2096.52	-1.56115	0.105975	-14.7313	4.05587e-49	7.53403e-48	AAEL010991	long-chain-fatty-acid coa ligase [Source:VB Community Annotation]			GO:0003824,GO:0016020,GO:0016021	catalytic activity,membrane,integral component of membrane
LOC5570155	418.899	-2.9948	0.20337	-14.7259	4.39617e-49	8.15622e-48	AAEL008126	GPCR Latrophilin Family [Source:VB Community Annotation]	GPRCIR		GO:0005886,GO:0016020,GO:0016021,GO:0030246	plasma membrane,membrane,integral component of membrane,carbohydrate binding
LOC5578376	309.754	-2.45314	0.16663	-14.7221	4.65073e-49	8.618e-48	AAEL019481				GO:0003676,GO:0005515	nucleic acid binding,protein binding
LOC5568129	153.326	-3.27439	0.223258	-14.6664	1.05775e-48	1.9553e-47	AAEL006570				GO:0016020,GO:0016021	membrane,integral component of membrane
LOC5568774	153.326	-3.27439	0.223258	-14.6664	1.05775e-48	1.9553e-47	AAEL015457				GO:0016020,GO:0016021	membrane,integral component of membrane
LOC5570290	435.457	3.18514	0.217192	14.6651	1.07881e-48	1.99181e-47	AAEL024936				GO:0005515,GO:0032502	protein binding,developmental process
LOC5566725	1274.13	-2.00066	0.13659	-14.6472	1.40329e-48	2.58776e-47	AAEL005617	UTP-glucose-1-phosphate uridylyltransferase 2 [Source:VB Community Annotation]			GO:0003983,GO:0006011,GO:0016740,GO:0016779,GO:0070569	UTP:glucose-1-phosphate uridylyltransferase activity,UDP-glucose metabolic process,transferase activity,nucleotidyltransferase activity,uridylyltransferase activity
LOC110681310	122.194	-4.24105	0.289625	-14.6433	1.48775e-48	2.7402e-47	AAEL023742				GO:0016021,GO:0051180,GO:0090482	integral component of membrane,vitamin transport,vitamin transmembrane transporter activity
LOC5567541	688.082	-1.51973	0.103786	-14.6429	1.49568e-48	2.75148e-47	AAEL006121	trypsin, putative [Source:VB Community Annotation]			GO:0004252,GO:0006508	serine-type endopeptidase activity,proteolysis
LOC5571668	451.187	3.94156	0.269192	14.6422	1.51096e-48	2.77622e-47	AAEL019611				GO:0003700,GO:0006357	DNA-binding transcription factor activity,regulation of transcription by RNA polymerase II
LOC5568637	1149.04	-1.89141	0.129231	-14.6359	1.65843e-48	3.04352e-47	AAEL007017
LOC5568282	173.077	3.15102	0.215308	14.635	1.68068e-48	3.08064e-47	AAEL006708	hedgehog [Source:VB Community Annotation]			GO:0005576,GO:0005615,GO:0005634,GO:0005737,GO:0005886,GO:0006508,GO:0007165,GO:0007267,GO:0007275,GO:0007367,GO:0008233,GO:0009653,GO:0016015,GO:0016020,GO:0016539,GO:0016540,GO:0016787,GO:0046872	extracellular region,extracellular space,nucleus,cytoplasm,plasma membrane,proteolysis,signal transduction,cell-cell signaling,multicellular organism development,segment polarity determination,peptidase activity,anatomical structure morphogenesis,morphogen activity,membrane,intein-mediated protein splicing,protein autoprocessing,hydrolase activity,metal ion binding
LOC5571736	6027.8	-2.16475	0.147938	-14.6328	1.73405e-48	3.17465e-47	AAEL009263				GO:0003700,GO:0006355	DNA-binding transcription factor activity,regulation of transcription, DNA-templated
LOC5570078	896.577	2.56264	0.175158	14.6305	1.79429e-48	3.28098e-47	AAEL018214				GO:0005085,GO:0005089,GO:0005856,GO:0005912,GO:0008092,GO:0030054,GO:0035023	guanyl-nucleotide exchange factor activity,Rho guanyl-nucleotide exchange factor activity,cytoskeleton,adherens junction,cytoskeletal protein binding,cell junction,regulation of Rho protein signal transduction
LOC5567902	1041.79	1.4817	0.101282	14.6294	1.82284e-48	3.3292e-47	AAEL006337				GO:0006508,GO:0008233,GO:0008234	proteolysis,peptidase activity,cysteine-type peptidase activity
LOC5565322	577.86	-1.89399	0.129466	-14.6292	1.82826e-48	3.3351e-47	AAEL004728	5-methyltetrahydrofolate:homocysteine methyltransferase [Source:UniProtKB/TrEMBL;Acc:Q17C46]			GO:0008168,GO:0008270,GO:0009086,GO:0016740,GO:0032259,GO:0046872,GO:0047150	methyltransferase activity,zinc ion binding,methionine biosynthetic process,transferase activity,methylation,metal ion binding,betaine-homocysteine S-methyltransferase activity
LOC5564382	320.289	-2.13162	0.145859	-14.6142	2.27919e-48	4.1527e-47	AAEL014411	cytochrome P450 [Source:VB Community Annotation]	CYP304B3		GO:0004497,GO:0005506,GO:0016491,GO:0016705,GO:0020037,GO:0046872,GO:0055114	monooxygenase activity,iron ion binding,oxidoreductase activity,oxidoreductase activity, acting on paired donors, with incorporation or reduction of molecular oxygen,heme binding,metal ion binding,oxidation-reduction process
LOC5576479	605.7	-1.55373	0.106322	-14.6135	2.30539e-48	4.19543e-47	AAEL002905				GO:0016020,GO:0016021	membrane,integral component of membrane
LOC5567319	377.062	-2.95853	0.202745	-14.5924	3.14018e-48	5.70778e-47	AAEL015335				GO:0005789,GO:0016020,GO:0016021,GO:0019915	endoplasmic reticulum membrane,membrane,integral component of membrane,lipid storage
LOC5571599	1952.41	-2.96525	0.203211	-14.592	3.15725e-48	5.73197e-47	AAEL009189	encore protein [Source:VB Community Annotation]			GO:0003676	nucleic acid binding
LOC5566553	1975.04	-1.94139	0.133047	-14.5918	3.16749e-48	5.74372e-47	AAEL005476				GO:0005515	protein binding
LOC110676794	290.863	-2.93711	0.201308	-14.5902	3.24339e-48	5.87435e-47	AAEL027148				GO:0003676	nucleic acid binding
LOC5564521	593.357	-2.62764	0.180155	-14.5855	3.47422e-48	6.28495e-47	AAEL019484				GO:0007165	signal transduction
LOC5570926	1056.31	-1.51788	0.104122	-14.5779	3.88006e-48	7.0108e-47	AAEL019916
LOC5563572	1002.43	-2.48434	0.170421	-14.5777	3.89548e-48	7.03032e-47	AAEL000053	myotubularin [Source:VB Community Annotation]
LOC5565937	476.849	-2.67532	0.183852	-14.5515	5.71486e-48	1.03016e-46	AAEL024930				GO:0005112,GO:0005509,GO:0005515,GO:0007154,GO:0007219,GO:0007275,GO:0016020,GO:0016021	Notch binding,calcium ion binding,protein binding,cell communication,Notch signaling pathway,multicellular organism development,membrane,integral component of membrane
LOC5567105	1645.61	-1.92137	0.132089	-14.546	6.19241e-48	1.11493e-46	AAEL005827	katanin P80 subunit [Source:VB Community Annotation]			GO:0005515,GO:0005737,GO:0005856,GO:0008017,GO:0008352,GO:0051013	protein binding,cytoplasm,cytoskeleton,microtubule binding,katanin complex,microtubule severing
LOC5575196	1234.52	-1.40588	0.0966586	-14.5448	6.30217e-48	1.13335e-46	AAEL019921				GO:0000166,GO:0005524,GO:0005737,GO:0005813,GO:0005815,GO:0005819,GO:0005856,GO:0005874,GO:0008017,GO:0008568,GO:0016020,GO:0016021,GO:0016853,GO:0016887,GO:0031117,GO:0034214,GO:0051013	nucleotide binding,ATP binding,cytoplasm,centrosome,microtubule organizing center,spindle,cytoskeleton,microtubule,microtubule binding,microtubule-severing ATPase activity,membrane,integral component of membrane,isomerase activity,ATPase activity,positive regulation of microtubule depolymerization,protein hexamerization,microtubule severing
LOC5571904	3947.13	-1.27743	0.0878622	-14.539	6.85649e-48	1.23158e-46	AAEL009400	ccr4-associated factor [Source:VB Community Annotation]			GO:0003676,GO:0004535,GO:0006417,GO:0030014,GO:0090503	nucleic acid binding,poly(A)-specific ribonuclease activity,regulation of translation,CCR4-NOT complex,RNA phosphodiester bond hydrolysis, exonucleolytic
LOC5573190	1202.22	-2.57145	0.176877	-14.5381	6.95141e-48	1.24716e-46	AAEL001959
LOC5575911	980.8	-1.6436	0.113064	-14.537	7.06703e-48	1.26641e-46	AAEL021400				GO:0005515	protein binding
LOC5565293	1047.73	2.94373	0.202503	14.5367	7.09184e-48	1.26936e-46	AAEL010487				GO:0016020,GO:0016021	membrane,integral component of membrane
LOC5564778	717.582	-2.4055	0.165495	-14.5352	7.25323e-48	1.29673e-46	AAEL004444	Zinc finger protein [Source:UniProtKB/TrEMBL;Acc:A0A1S4F7X7]			GO:0003676	nucleic acid binding
LOC110679138	253.4	-3.39431	0.233581	-14.5316	7.63737e-48	1.3638e-46	AAEL018047				GO:0046872	metal ion binding
LOC5571728	234.862	-7.40107	0.509468	-14.527	8.16623e-48	1.45653e-46	AAEL009269				GO:0005515	protein binding
LOC5565869	1762.37	1.31531	0.090551	14.5256	8.3351e-48	1.48491e-46	AAEL015007	Proteasome subunit alpha type [Source:UniProtKB/TrEMBL;Acc:Q16EV7]			GO:0000502,GO:0004175,GO:0004298,GO:0005634,GO:0005737,GO:0005839,GO:0006508,GO:0006511,GO:0008233,GO:0016787,GO:0019773,GO:0051603	proteasome complex,endopeptidase activity,threonine-type endopeptidase activity,nucleus,cytoplasm,proteasome core complex,proteolysis,ubiquitin-dependent protein catabolic process,peptidase activity,hydrolase activity,proteasome core complex, alpha-subunit complex,proteolysis involved in cellular protein catabolic process
LOC5565917	632.056	-2.22797	0.153435	-14.5206	8.97215e-48	1.59654e-46	AAEL000698				GO:0005515,GO:0008270	protein binding,zinc ion binding
LOC5564418	1662.77	3.7669	0.259505	14.5157	9.63893e-48	1.71319e-46	AAEL014428	ABC transporter [Source:VB Community Annotation]			GO:0000166,GO:0005524,GO:0016020,GO:0016021,GO:0016887,GO:0043190,GO:0055085	nucleotide binding,ATP binding,membrane,integral component of membrane,ATPase activity,ATP-binding cassette (ABC) transporter complex,transmembrane transport
LOC5572408	218.875	-3.71508	0.256261	-14.4972	1.26119e-47	2.23898e-46	AAEL009799				GO:0003676	nucleic acid binding
LOC110676244	665.28	1.53583	0.105944	14.4966	1.27307e-47	2.25743e-46	AAEL027354				GO:0005975,GO:0016773	carbohydrate metabolic process,phosphotransferase activity, alcohol group as acceptor
LOC5564381	142.706	5.0373	0.347502	14.4958	1.28851e-47	2.28216e-46	AAEL014412	cytochrome P450 [Source:VB Community Annotation]	CYP304B2		GO:0004497,GO:0005506,GO:0016020,GO:0016021,GO:0016491,GO:0016705,GO:0020037,GO:0046872,GO:0055114	monooxygenase activity,iron ion binding,membrane,integral component of membrane,oxidoreductase activity,oxidoreductase activity, acting on paired donors, with incorporation or reduction of molecular oxygen,heme binding,metal ion binding,oxidation-reduction process
LOC5572685	2503.41	-2.13067	0.147048	-14.4896	1.40897e-47	2.49262e-46	AAEL021169
LOC5578781	4219.15	-1.31849	0.0910651	-14.4785	1.65577e-47	2.92583e-46	AAEL019637				GO:0000786,GO:0003677,GO:0005634,GO:0005694,GO:0006334,GO:0042025,GO:0046982	nucleosome,DNA binding,nucleus,chromosome,nucleosome assembly,host cell nucleus,protein heterodimerization activity
LOC110678781	154.827	-4.34202	0.300075	-14.4698	1.88086e-47	3.31973e-46	AAEL024476				GO:0003677,GO:0046983	DNA binding,protein dimerization activity
LOC5570660	1395.18	2.38635	0.164959	14.4663	1.97882e-47	3.48858e-46	AAEL026737				GO:0003824,GO:0004497,GO:0004500,GO:0005507,GO:0016715,GO:0055114	catalytic activity,monooxygenase activity,dopamine beta-monooxygenase activity,copper ion binding,oxidoreductase activity, acting on paired donors, with incorporation or reduction of molecular oxygen, reduced ascorbate as one donor, and incorporation of one atom of oxygen,oxidation-reduction process
LOC5574847	175.203	3.75918	0.260267	14.4436	2.75146e-47	4.84511e-46	AAEL011452
LOC110678495	464.979	1.95206	0.135236	14.4344	3.14228e-47	5.52693e-46	AAEL020467
LOC5567620	323.256	4.09421	0.283762	14.4283	3.43344e-47	6.03209e-46	AAEL006216				GO:0005515	protein binding
LOC5570913	15430.1	1.3946	0.0966828	14.4245	3.62889e-47	6.36811e-46	AAEL001484	chromosome region maintenance protein 1/exportin [Source:VB Community Annotation]			GO:0005049,GO:0005634,GO:0006886,GO:0008536,GO:0015031,GO:0051168	nuclear export signal receptor activity,nucleus,intracellular protein transport,Ran GTPase binding,protein transport,nuclear export
LOC5576364	1827.87	1.95103	0.135274	14.4229	3.71623e-47	6.51387e-46	AAEL002869				GO:0005886,GO:0016020,GO:0016021	plasma membrane,membrane,integral component of membrane
LOC5571642	2326.92	1.35498	0.0940361	14.4091	4.53488e-47	7.93969e-46	AAEL001649	leucine aminopeptidase [Source:VB Community Annotation]			GO:0004177,GO:0005737,GO:0006508,GO:0008233,GO:0008235,GO:0016787,GO:0019538,GO:0030145,GO:0070006	aminopeptidase activity,cytoplasm,proteolysis,peptidase activity,metalloexopeptidase activity,hydrolase activity,protein metabolic process,manganese ion binding,metalloaminopeptidase activity
LOC5577439	2516.14	-1.38123	0.0959215	-14.3996	5.20313e-47	9.09921e-46	AAEL019824				GO:0004721,GO:0006470,GO:0016787	phosphoprotein phosphatase activity,protein dephosphorylation,hydrolase activity
LOC5564314	1025.49	3.07219	0.213401	14.3963	5.45674e-47	9.53177e-46	AAEL000581				GO:0003824,GO:0016787	catalytic activity,hydrolase activity
LOC5567293	682.727	-2.05715	0.142896	-14.3961	5.47172e-47	9.54699e-46	AAEL005943	ser/thr kinase stk11 (lkb1) [Source:VB Community Annotation]			GO:0000166,GO:0001558,GO:0004672,GO:0004674,GO:0005524,GO:0005737,GO:0006468,GO:0016301,GO:0016310,GO:0016740,GO:0030010,GO:0030295,GO:0032147,GO:0042593,GO:0046872	nucleotide binding,regulation of cell growth,protein kinase activity,protein serine/threonine kinase activity,ATP binding,cytoplasm,protein phosphorylation,kinase activity,phosphorylation,transferase activity,establishment of cell polarity,protein kinase activator activity,activation of protein kinase activity,glucose homeostasis,metal ion binding
LOC5578812	1293.7	-1.80062	0.125095	-14.394	5.64757e-47	9.84254e-46	AAEL013852
LOC5578717	1198.96	-2.33844	0.16257	-14.3842	6.49953e-47	1.13144e-45	AAEL003861	bmp-induced factor [Source:VB Community Annotation]			GO:0003676,GO:0005515	nucleic acid binding,protein binding
LOC5575798	179.585	3.39066	0.235734	14.3835	6.57303e-47	1.14293e-45	AAEL012077	NAD dehydrogenase [Source:VB Community Annotation]			GO:0005515,GO:0016491,GO:0055114	protein binding,oxidoreductase activity,oxidation-reduction process
LOC23687749	2829.06	-2.32288	0.161729	-14.3628	8.86079e-47	1.53897e-45	AAEL017329				GO:0005515,GO:0008270,GO:0046872	protein binding,zinc ion binding,metal ion binding
LOC5577432	1849.04	-1.48608	0.103498	-14.3586	9.41692e-47	1.6337e-45	AAEL013170	phosphatidylcholine-sterol acyltransferase (lecithin-cholesterol acyltransferase) [Source:VB Community Annotation]			GO:0006629,GO:0008374	lipid metabolic process,O-acyltransferase activity
LOC23687495	17580.7	1.45377	0.101275	14.3547	9.95481e-47	1.72505e-45	AAEL017075				GO:0005730,GO:0046872	nucleolus,metal ion binding
LOC5579192	162.265	3.61808	0.252107	14.3514	1.04408e-46	1.80721e-45	AAEL003889	Gram-Negative Binding Protein (GNBP) or Beta-1 3-Glucan Binding Protein (BGBP). [Source:VB Community Annotation]	GNBPB1		GO:0004553,GO:0005975	hydrolase activity, hydrolyzing O-glycosyl compounds,carbohydrate metabolic process
LOC5574529	275.902	3.32406	0.231881	14.3352	1.31846e-46	2.27955e-45	AAEL011206	aminoacylase, putative [Source:VB Community Annotation]			GO:0004046,GO:0005737,GO:0006520,GO:0016787	aminoacylase activity,cytoplasm,cellular amino acid metabolic process,hydrolase activity
LOC5576943	492.469	-1.95889	0.13669	-14.3309	1.4023e-46	2.42175e-45	AAEL018699				GO:0005515,GO:0016020,GO:0016021	protein binding,membrane,integral component of membrane
LOC5577676	840.786	-2.40212	0.167619	-14.3308	1.40524e-46	2.42408e-45	AAEL019434				GO:0003676,GO:0004721,GO:0004725,GO:0006470,GO:0008138,GO:0016311,GO:0016787,GO:0016791,GO:0035335	nucleic acid binding,phosphoprotein phosphatase activity,protein tyrosine phosphatase activity,protein dephosphorylation,protein tyrosine/serine/threonine phosphatase activity,dephosphorylation,hydrolase activity,phosphatase activity,peptidyl-tyrosine dephosphorylation
LOC5570859	401.486	-3.07117	0.214485	-14.3188	1.66984e-46	2.87727e-45	AAEL027367				GO:0000166,GO:0005524,GO:0016020,GO:0016021,GO:0016887,GO:0042626	nucleotide binding,ATP binding,membrane,integral component of membrane,ATPase activity,ATPase-coupled transmembrane transporter activity
LOC5567452	470.986	-2.02253	0.141264	-14.3174	1.70277e-46	2.93068e-45	AAEL000961				GO:0046872	metal ion binding
LOC5580067	314.696	2.13498	0.149163	14.3131	1.81308e-46	3.11702e-45	AAEL002176	inosine-uridine preferring nucleoside hydrolase [Source:VB Community Annotation]
LOC5576480	739.797	-1.59262	0.111291	-14.3104	1.88417e-46	3.23559e-45	AAEL002892	protein kinase c, mu [Source:VB Community Annotation]			GO:0000166,GO:0004672,GO:0004674,GO:0004697,GO:0004698,GO:0005524,GO:0005737,GO:0006468,GO:0016020,GO:0016301,GO:0016310,GO:0016740,GO:0035556,GO:0046872	nucleotide binding,protein kinase activity,protein serine/threonine kinase activity,protein kinase C activity,calcium-dependent protein kinase C activity,ATP binding,cytoplasm,protein phosphorylation,membrane,kinase activity,phosphorylation,transferase activity,intracellular signal transduction,metal ion binding
LOC5573299	1334.24	2.45093	0.171298	14.308	1.95052e-46	3.34576e-45	AAEL010374	tyrosine-protein kinase transmembrane receptor [Source:VB Community Annotation]			GO:0000166,GO:0004672,GO:0004713,GO:0004714,GO:0005515,GO:0005524,GO:0006468,GO:0007169,GO:0016020,GO:0016021,GO:0016301,GO:0016310,GO:0018108	nucleotide binding,protein kinase activity,protein tyrosine kinase activity,transmembrane receptor protein tyrosine kinase activity,protein binding,ATP binding,protein phosphorylation,transmembrane receptor protein tyrosine kinase signaling pathway,membrane,integral component of membrane,kinase activity,phosphorylation,peptidyl-tyrosine phosphorylation
LOC5577047	295.001	-4.28328	0.299371	-14.3076	1.96193e-46	3.36155e-45	AAEL021162
LOC5574825	526.739	-1.95735	0.136836	-14.3043	2.05635e-46	3.51936e-45	AAEL022941				GO:0000166,GO:0005524,GO:0016020,GO:0016021,GO:0016887,GO:0042626,GO:0055085	nucleotide binding,ATP binding,membrane,integral component of membrane,ATPase activity,ATPase-coupled transmembrane transporter activity,transmembrane transport
LOC5576987	1003.97	-1.43596	0.10041	-14.3009	2.15927e-46	3.69136e-45	AAEL003065				GO:0046872	metal ion binding
LOC110675802	157.588	4.2653	0.298278	14.2997	2.19601e-46	3.74997e-45	AAEL023633
LOC5569106	237.343	-3.65118	0.25546	-14.2926	2.43463e-46	4.15278e-45	AAEL007372	GPCR GABA B Family [Source:VB Community Annotation]	GPRGBB1		GO:0004930,GO:0004965,GO:0007186,GO:0016020,GO:0016021	G protein-coupled receptor activity,G protein-coupled GABA receptor activity,G protein-coupled receptor signaling pathway,membrane,integral component of membrane
LOC5567139	1418.22	-1.29699	0.0907856	-14.2863	2.66337e-46	4.53786e-45	AAEL005890
LOC110681130	314.485	-2.0149	0.14116	-14.2739	3.18269e-46	5.41662e-45	AAEL020987				GO:0003993,GO:0004725,GO:0004726,GO:0005737,GO:0006470,GO:0016787,GO:0035335	acid phosphatase activity,protein tyrosine phosphatase activity,non-membrane spanning protein tyrosine phosphatase activity,cytoplasm,protein dephosphorylation,hydrolase activity,peptidyl-tyrosine dephosphorylation
LOC5574176	812.767	2.04356	0.143177	14.2729	3.22676e-46	5.48548e-45	AAEL020455
LOC110675371	1009.44	-1.74788	0.122471	-14.2718	3.27967e-46	5.56922e-45	AAEL027353
LOC5576161	1119.09	1.37741	0.0965818	14.2615	3.79925e-46	6.44434e-45	AAEL007259				GO:0016020,GO:0016021	membrane,integral component of membrane
LOC5570552	1416	-1.93204	0.135508	-14.2578	4.00894e-46	6.79246e-45	AAEL008370	Class B Scavenger Receptor (CD36 domain). [Source:VB Community Annotation]	SCRB17		GO:0005886,GO:0016020,GO:0016021	plasma membrane,membrane,integral component of membrane
LOC5568528	3553.55	-1.794	0.125867	-14.2531	4.28747e-46	7.25631e-45	AAEL018126
LOC5571325	509.968	4.33376	0.304123	14.25	4.48182e-46	7.57681e-45	AAEL008963	tyrosine aminotransferase [Source:VB Community Annotation]			GO:0003824,GO:0004838,GO:0006520,GO:0006559,GO:0006572,GO:0008483,GO:0009058,GO:0009072,GO:0030170	catalytic activity,L-tyrosine:2-oxoglutarate aminotransferase activity,cellular amino acid metabolic process,L-phenylalanine catabolic process,tyrosine catabolic process,transaminase activity,biosynthetic process,aromatic amino acid family metabolic process,pyridoxal phosphate binding
LOC5572361	162.548	5.83082	0.409284	14.2464	4.72077e-46	7.97193e-45	AAEL009753	sodium-dependent phosphate transporter [Source:VB Community Annotation]			GO:0016020,GO:0016021,GO:0022857,GO:0042302,GO:0055085	membrane,integral component of membrane,transmembrane transporter activity,structural constituent of cuticle,transmembrane transport
LOC5570502	893.256	1.67524	0.117628	14.2419	5.03199e-46	8.48808e-45	AAEL001403				GO:0030431,GO:0032222,GO:1903818	sleep,regulation of synaptic transmission, cholinergic,positive regulation of voltage-gated potassium channel activity
LOC5577916	1240.97	-1.92021	0.134909	-14.2334	5.6883e-46	9.58453e-45	AAEL003343				GO:0005515,GO:0046872	protein binding,metal ion binding
LOC5571821	149.468	-3.45937	0.24319	-14.2249	6.4162e-46	1.07991e-44	AAEL001691	adenylate cyclase [Source:VB Community Annotation]			GO:0016020,GO:0016021,GO:0022857,GO:0055085	membrane,integral component of membrane,transmembrane transporter activity,transmembrane transport
LOC5567861	724.906	-1.77422	0.124736	-14.2238	6.52423e-46	1.09688e-44	AAEL006317	short-chain dehydrogenase [Source:VB Community Annotation]			GO:0004454,GO:0006000,GO:0016020,GO:0016021,GO:0046835,GO:0055114	ketohexokinase activity,fructose metabolic process,membrane,integral component of membrane,carbohydrate phosphorylation,oxidation-reduction process
LOC5567254	990.617	-1.76685	0.124302	-14.2142	7.47976e-46	1.25614e-44	AAEL025460				GO:0000166,GO:0005524,GO:0016020,GO:0016021,GO:0016887,GO:0042626,GO:0055085	nucleotide binding,ATP binding,membrane,integral component of membrane,ATPase activity,ATPase-coupled transmembrane transporter activity,transmembrane transport
LOC5574828	952.296	-1.59142	0.112008	-14.2081	8.15712e-46	1.36838e-44	AAEL011441	calcium/calmodulin-dependent protein kinase type 1 (camki) [Source:VB Community Annotation]			GO:0000166,GO:0004672,GO:0004674,GO:0005524,GO:0006468	nucleotide binding,protein kinase activity,protein serine/threonine kinase activity,ATP binding,protein phosphorylation
LOC5578193	254.424	3.0433	0.214234	14.2055	8.46871e-46	1.41909e-44	AAEL003481	Glycosyltransferase 25 family member Precursor (EC 2.-.-.-) [Source:VB Community Annotation]			GO:0005783,GO:0005788,GO:0016740,GO:0016757	endoplasmic reticulum,endoplasmic reticulum lumen,transferase activity,transferase activity, transferring glycosyl groups
LOC5578578	309.255	2.67665	0.18847	14.202	8.90108e-46	1.4899e-44	AAEL013764	WD-repeat protein [Source:VB Community Annotation]			GO:0005515,GO:0005929,GO:0042995,GO:0060271	protein binding,cilium,cell projection,cilium assembly
LOC5580276	2222.48	-1.11077	0.078239	-14.1971	9.55062e-46	1.59687e-44	AAEL003013	dual specificity mitogen-activated protein kinase kinase 4 MAPKK4 [Source:VB Community Annotation]			GO:0000166,GO:0004672,GO:0004674,GO:0005524,GO:0006468,GO:0016301,GO:0016310	nucleotide binding,protein kinase activity,protein serine/threonine kinase activity,ATP binding,protein phosphorylation,kinase activity,phosphorylation
LOC110678735	1413.95	2.32495	0.163777	14.1958	9.7228e-46	1.62388e-44	AAEL023730				GO:0003677,GO:0006355,GO:0043565	DNA binding,regulation of transcription, DNA-templated,sequence-specific DNA binding
LOC5574088	706.747	-2.11751	0.149186	-14.1937	1.00174e-45	1.67125e-44	AAEL002250	terminal deoxycytidyl transferase rev1 [Source:VB Community Annotation]			GO:0003684,GO:0006281,GO:0016779,GO:0042276	damaged DNA binding,DNA repair,nucleotidyltransferase activity,error-prone translesion synthesis
LOC5577203	2534.02	-2.04576	0.144181	-14.1888	1.07487e-45	1.7913e-44	AAEL013102				GO:0005085,GO:0005089,GO:0005515,GO:0005737,GO:0016020,GO:0035556	guanyl-nucleotide exchange factor activity,Rho guanyl-nucleotide exchange factor activity,protein binding,cytoplasm,membrane,intracellular signal transduction
LOC110680352	234.164	2.71928	0.191681	14.1865	1.11089e-45	1.8493e-44	AAEL023185
LOC5570058	3046.64	-2.13245	0.150359	-14.1824	1.17789e-45	1.95869e-44	AAEL000217	serine/threonine protein kinase [Source:VB Community Annotation]			GO:0004672,GO:0005524,GO:0006468	protein kinase activity,ATP binding,protein phosphorylation
LOC5569911	201.352	4.24961	0.299642	14.1823	1.17963e-45	1.95945e-44	AAEL008007
LOC110678839	813.503	2.04355	0.144242	14.1675	1.45628e-45	2.41634e-44	AAEL020455
LOC5564428	160.395	3.61127	0.25492	14.1663	1.48091e-45	2.45454e-44	AAEL014435	juvenile hormone-inducible protein, putative [Source:VB Community Annotation]
LOC110675573	722.396	2.76415	0.19514	14.1649	1.50994e-45	2.49994e-44	AAEL027407
LOC5571943	3005.48	-1.34084	0.0947117	-14.1571	1.68908e-45	2.79349e-44	AAEL009427				GO:0046872	metal ion binding
LOC5564326	2477.13	-2.05395	0.145174	-14.1482	1.91557e-45	3.16464e-44	AAEL019671
LOC5579977	513.989	-1.85143	0.130894	-14.1445	2.01958e-45	3.33285e-44	AAEL007738	app binding protein [Source:VB Community Annotation]			GO:0008641,GO:0019781,GO:0045116	ubiquitin-like modifier activating enzyme activity,NEDD8 activating enzyme activity,protein neddylation
LOC110680514	305.295	-4.0829	0.288755	-14.1397	2.16306e-45	3.56247e-44	AAEL021052
LOC5570536	203.716	3.73442	0.26411	14.1397	2.16339e-45	3.56247e-44	AAEL001437				GO:0005515,GO:0006355	protein binding,regulation of transcription, DNA-templated
LOC5569025	8508.55	3.4634	0.245028	14.1347	2.32089e-45	3.81768e-44	AAEL007314
LOC5564078	1901.95	-1.23725	0.0875462	-14.1325	2.39377e-45	3.93332e-44	AAEL014296	major sperm protein [Source:VB Community Annotation]			GO:0016020,GO:0016021	membrane,integral component of membrane
LOC5564172	353.593	-2.42369	0.171499	-14.1324	2.3976e-45	3.93537e-44	AAEL004124	mitochondrial glutamate carrier, putative [Source:VB Community Annotation]			GO:0005347,GO:0015867,GO:0016020,GO:0016021,GO:0022857,GO:0055085	ATP transmembrane transporter activity,ATP transport,membrane,integral component of membrane,transmembrane transporter activity,transmembrane transport
LOC5570905	381.828	-2.57366	0.182198	-14.1256	2.64056e-45	4.3295e-44	AAEL001492	cgmp-dependent 3,5-cyclic phosphodiesterase [Source:VB Community Annotation]			GO:0004114,GO:0005515,GO:0007165,GO:0008081,GO:0016787,GO:0046872,GO:0047555	3',5'-cyclic-nucleotide phosphodiesterase activity,protein binding,signal transduction,phosphoric diester hydrolase activity,hydrolase activity,metal ion binding,3',5'-cyclic-GMP phosphodiesterase activity
LOC5567646	281.795	3.17832	0.22502	14.1246	2.67953e-45	4.38867e-44	AAEL006240	purple acid phosphatase, putative [Source:VB Community Annotation]			GO:0003993,GO:0016311,GO:0016787,GO:0046872	acid phosphatase activity,dephosphorylation,hydrolase activity,metal ion binding
LOC5570936	478.575	-1.96056	0.13881	-14.124	2.70121e-45	4.41942e-44	AAEL008673	ras-related protein Rab-9, putative [Source:VB Community Annotation]			GO:0003924,GO:0005525	GTPase activity,GTP binding
LOC5568209	497.808	-1.66053	0.117602	-14.1199	2.86247e-45	4.67823e-44	AAEL006656				GO:0005886,GO:0016020,GO:0016021,GO:0046983	plasma membrane,membrane,integral component of membrane,protein dimerization activity
LOC110677731	1574.47	-1.80473	0.127868	-14.114	3.11334e-45	5.08278e-44	AAEL021862
LOC5572825	1836.46	2.441	0.173023	14.1079	3.39321e-45	5.53376e-44	AAEL001912	forkhead protein/ forkhead protein domain [Source:VB Community Annotation]			GO:0003677,GO:0003700,GO:0005634,GO:0006355,GO:0007275,GO:0043565	DNA binding,DNA-binding transcription factor activity,nucleus,regulation of transcription, DNA-templated,multicellular organism development,sequence-specific DNA binding
LOC5563966	373.535	-2.12487	0.1507	-14.1	3.79985e-45	6.1903e-44	AAEL004025	glucose dehydrogenase [Source:VB Community Annotation]			GO:0016614,GO:0050660,GO:0055114	oxidoreductase activity, acting on CH-OH group of donors,flavin adenine dinucleotide binding,oxidation-reduction process
LOC5576199	719.458	-1.66013	0.117766	-14.0968	3.97115e-45	6.46245e-44	AAEL012387				GO:0005515	protein binding
LOC5568244	1392.07	-2.45658	0.174308	-14.0934	4.17239e-45	6.78269e-44	AAEL022611				GO:0005634,GO:0007275,GO:0007366,GO:0010468	nucleus,multicellular organism development,periodic partitioning by pair rule gene,regulation of gene expression
LOC5564034	1410.25	-1.55671	0.110485	-14.0897	4.39128e-45	7.13091e-44	AAEL004053	Nucleoporin NUP53 [Source:UniProtKB/TrEMBL;Acc:Q17DT3]			GO:0003676,GO:0005634,GO:0005643,GO:0006913,GO:0015031,GO:0017056,GO:0031965,GO:0051028	nucleic acid binding,nucleus,nuclear pore,nucleocytoplasmic transport,protein transport,structural constituent of nuclear pore,nuclear membrane,mRNA transport
LOC5570328	493.018	-1.94224	0.137889	-14.0855	4.66124e-45	7.56123e-44	AAEL001387				GO:0005737,GO:0005764,GO:0005765,GO:0016020	cytoplasm,lysosome,lysosomal membrane,membrane
LOC110678447	449.982	2.05797	0.146177	14.0786	5.14314e-45	8.33408e-44	AAEL025333				GO:0003676	nucleic acid binding
LOC5570335	7474.65	2.8148	0.199969	14.0762	5.3214e-45	8.61376e-44	AAEL019669				GO:0003676	nucleic acid binding
LOC110679299	446.438	3.72857	0.264917	14.0744	5.45275e-45	8.81702e-44	AAEL025647
LOC5570240	420.432	-2.10629	0.149656	-14.0742	5.47397e-45	8.84195e-44	AAEL008189				GO:0004672,GO:0005524,GO:0006468,GO:0035091	protein kinase activity,ATP binding,protein phosphorylation,phosphatidylinositol binding
LOC5574632	154.053	3.69015	0.262249	14.0712	5.71005e-45	9.2135e-44	AAEL024576				GO:0005515,GO:0005886,GO:0007155,GO:0007411,GO:0016020,GO:0016021	protein binding,plasma membrane,cell adhesion,axon guidance,membrane,integral component of membrane
LOC5578157	984.059	-2.24158	0.159355	-14.0666	6.09319e-45	9.82132e-44	AAEL013539	SH2/SH3 adaptor protein [Source:VB Community Annotation]			GO:0005070,GO:0005515	obsolete SH3/SH2 adaptor activity,protein binding
LOC5573396	520.053	-1.89786	0.134951	-14.0633	6.38242e-45	1.02766e-43	AAEL002051	sodium/hydrogen exchanger 7, 9 (nhe7, nhe9) [Source:VB Community Annotation]			GO:0005768,GO:0006811,GO:0006812,GO:0006814,GO:0006885,GO:0010008,GO:0015297,GO:0015299,GO:0015385,GO:0016020,GO:0016021,GO:0035725,GO:0055085,GO:1902600	endosome,ion transport,cation transport,sodium ion transport,regulation of pH,endosome membrane,antiporter activity,solute:proton antiporter activity,sodium:proton antiporter activity,membrane,integral component of membrane,sodium ion transmembrane transport,transmembrane transport,proton transmembrane transport
LOC110677175	470.074	2.71957	0.193447	14.0585	6.83526e-45	1.09942e-43	AAEL021359				GO:0022008	neurogenesis
LOC5570027	186.471	-2.95626	0.210314	-14.0564	7.03913e-45	1.13101e-43	AAEL000187	lim-kinase1 [Source:VB Community Annotation]			GO:0004672,GO:0005515,GO:0005524,GO:0006468,GO:0046872	protein kinase activity,protein binding,ATP binding,protein phosphorylation,metal ion binding
LOC5576960	669.303	-1.70797	0.12152	-14.0551	7.16823e-45	1.15054e-43	AAEL012916				GO:0005886,GO:0016020,GO:0016021	plasma membrane,membrane,integral component of membrane
LOC5578868	155.421	3.68025	0.262194	14.0363	9.34249e-45	1.49794e-43	AAEL003726				GO:0005515	protein binding
LOC110678396	375.737	-1.86189	0.132653	-14.0358	9.41512e-45	1.508e-43	AAEL023464
LOC5575133	372.235	2.70427	0.192772	14.0284	1.04504e-44	1.67206e-43	AAEL000314	malate dehydrogenase [Source:VB Community Annotation]			GO:0016491,GO:0055114	oxidoreductase activity,oxidation-reduction process
LOC5580194	1703.8	1.89795	0.135294	14.0283	1.0462e-44	1.67216e-43	AAEL002539	fimbrin/plastin [Source:VB Community Annotation]			GO:0003779,GO:0005509,GO:0005515,GO:0051015,GO:0051017	actin binding,calcium ion binding,protein binding,actin filament binding,actin filament bundle assembly
LOC5578628	1081.37	-2.529	0.180392	-14.0195	1.1849e-44	1.89186e-43	AAEL019997
LOC5564842	1961.75	-1.6561	0.118177	-14.0137	1.28569e-44	2.05064e-43	AAEL018350				GO:0005096,GO:0005737,GO:0007165	GTPase activator activity,cytoplasm,signal transduction
LOC5568099	4429.56	1.12552	0.0803847	14.0017	1.52149e-44	2.4242e-43	AAEL006552	WD-repeat protein [Source:VB Community Annotation]			GO:0005515	protein binding
LOC5580037	355.782	-2.38821	0.170653	-13.9945	1.68296e-44	2.67866e-43	AAEL010240				GO:0000786,GO:0003677,GO:0005634,GO:0006334,GO:0042025	nucleosome,DNA binding,nucleus,nucleosome assembly,host cell nucleus
LOC110681151	1605.41	-11.7689	0.840983	-13.9942	1.69058e-44	2.68799e-43	AAEL022031
LOC5567504	1604.88	-11.7684	0.840982	-13.9937	1.70398e-44	2.70646e-43	AAEL024633
LOC5565995	180.743	3.33466	0.238355	13.9903	1.78664e-44	2.8348e-43	AAEL014842	multiple inositol polyphosphate phosphatase [Source:VB Community Annotation]			GO:0004446,GO:0016311,GO:0016791,GO:0034417,GO:0052826	inositol-hexakisphosphate phosphatase activity,dephosphorylation,phosphatase activity,bisphosphoglycerate 3-phosphatase activity,inositol hexakisphosphate 2-phosphatase activity
LOC5573450	746.224	-2.00197	0.143128	-13.9873	1.86397e-44	2.95443e-43	AAEL019574				GO:0000166,GO:0005524,GO:0005634	nucleotide binding,ATP binding,nucleus
LOC23687462	539.613	-1.63439	0.116902	-13.9808	2.0409e-44	3.2315e-43	AAEL017042
LOC5576840	2220.11	1.45127	0.103807	13.9805	2.05055e-44	3.2434e-43	AAEL012825	bifunctional purine biosynthesis protein [Source:VB Community Annotation]			GO:0003824,GO:0003937,GO:0004643,GO:0006164,GO:0006189,GO:0008152,GO:0016740,GO:0016787	catalytic activity,IMP cyclohydrolase activity,phosphoribosylaminoimidazolecarboxamide formyltransferase activity,purine nucleotide biosynthetic process,'de novo' IMP biosynthetic process,metabolic process,transferase activity,hydrolase activity
LOC5569815	1177.18	3.8434	0.274921	13.98	2.06402e-44	3.26132e-43	AAEL001293
LOC5563768	1185.36	-1.44711	0.103563	-13.9732	2.27074e-44	3.58424e-43	AAEL019626				GO:0004672,GO:0005524,GO:0006468	protein kinase activity,ATP binding,protein phosphorylation
LOC5564040	551.23	1.84285	0.131949	13.9664	2.4995e-44	3.94123e-43	AAEL004050	diphosphomevalonate decarboxylase [Source:VB Community Annotation]			GO:0000166,GO:0004163,GO:0005524,GO:0005829,GO:0006629,GO:0006694,GO:0006695,GO:0008202,GO:0008203,GO:0008299,GO:0016126,GO:0016829,GO:0016831,GO:0019287	nucleotide binding,diphosphomevalonate decarboxylase activity,ATP binding,cytosol,lipid metabolic process,steroid biosynthetic process,cholesterol biosynthetic process,steroid metabolic process,cholesterol metabolic process,isoprenoid biosynthetic process,sterol biosynthetic process,lyase activity,carboxy-lyase activity,isopentenyl diphosphate biosynthetic process, mevalonate pathway
LOC5571097	8332.16	-1.59869	0.114491	-13.9635	2.60245e-44	4.09932e-43	AAEL001511
LOC5565951	770.562	1.8827	0.134836	13.9629	2.625e-44	4.13058e-43	AAEL024837				GO:0003824	catalytic activity
LOC5577433	826.557	-1.51392	0.108474	-13.9565	2.87193e-44	4.51447e-43	AAEL019845				GO:0016301,GO:0016310,GO:0016740,GO:0032958	kinase activity,phosphorylation,transferase activity,inositol phosphate biosynthetic process
LOC5568007	651.577	-1.59962	0.114645	-13.9528	3.02646e-44	4.75248e-43	AAEL006446	trehalose-6-phosphate synthase [Source:VB Community Annotation]			GO:0003824,GO:0005992	catalytic activity,trehalose biosynthetic process
LOC5576999	704.69	-1.9242	0.137915	-13.9521	3.05571e-44	4.79347e-43	AAEL003090	malate synthase [Source:VB Community Annotation]			GO:0003824,GO:0004474,GO:0006097,GO:0006099,GO:0016740	catalytic activity,malate synthase activity,glyoxylate cycle,tricarboxylic acid cycle,transferase activity
LOC5570159	1231.8	-1.38248	0.0991399	-13.9447	3.38651e-44	5.30692e-43	AAEL008131	cytidylate kinase [Source:VB Community Annotation]			GO:0000166,GO:0004127,GO:0005524,GO:0005634,GO:0005737,GO:0006139,GO:0006207,GO:0006221,GO:0009041,GO:0016301,GO:0016310,GO:0016740,GO:0019205,GO:0046940	nucleotide binding,cytidylate kinase activity,ATP binding,nucleus,cytoplasm,nucleobase-containing compound metabolic process,'de novo' pyrimidine nucleobase biosynthetic process,pyrimidine nucleotide biosynthetic process,uridylate kinase activity,kinase activity,phosphorylation,transferase activity,nucleobase-containing compound kinase activity,nucleoside monophosphate phosphorylation
LOC5573627	1015.32	1.41364	0.101377	13.9444	3.40363e-44	5.32827e-43	AAEL010619				GO:0000166,GO:0003777,GO:0005524,GO:0007018,GO:0008017	nucleotide binding,microtubule motor activity,ATP binding,microtubule-based movement,microtubule binding
LOC5569754	727.474	1.76983	0.126924	13.944	3.42221e-44	5.35077e-43	AAEL007914	discs large protein [Source:VB Community Annotation]			GO:0005515	protein binding
LOC5576950	6597.44	0.901096	0.0646228	13.9439	3.42503e-44	5.35077e-43	AAEL012904	rab gdp-dissociation inhibitor [Source:VB Community Annotation]			GO:0005092,GO:0005093,GO:0005096,GO:0005737,GO:0007264,GO:0015031,GO:0043547,GO:0050790	GDP-dissociation inhibitor activity,Rab GDP-dissociation inhibitor activity,GTPase activator activity,cytoplasm,small GTPase mediated signal transduction,protein transport,positive regulation of GTPase activity,regulation of catalytic activity
LOC5578975	1889.97	-2.21998	0.15928	-13.9376	3.74276e-44	5.84117e-43	AAEL024153				GO:1990817	RNA adenylyltransferase activity
LOC5574569	438.807	1.77744	0.127537	13.9367	3.79011e-44	5.90901e-43	AAEL011239	short-chain dehydrogenase [Source:VB Community Annotation]			GO:0005737,GO:0006888,GO:0016192,GO:0048471,GO:0055114	cytoplasm,endoplasmic reticulum to Golgi vesicle-mediated transport,vesicle-mediated transport,perinuclear region of cytoplasm,oxidation-reduction process
LOC5569558	420.645	-1.84419	0.132441	-13.9246	4.49236e-44	6.99668e-43	AAEL007757				GO:0005524,GO:0016020,GO:0016021	ATP binding,membrane,integral component of membrane
LOC110677277	144.293	4.19671	0.301464	13.9211	4.7155e-44	7.33672e-43	AAEL020842
LOC5566765	787.676	-1.49956	0.107737	-13.9187	4.87656e-44	7.57956e-43	AAEL005634	harmonin (Usher syndrome 1C protein homolog) (PDZ domain-containing protein) [Source:VB Community Annotation]			GO:0005515,GO:0007605,GO:0051015	protein binding,sensory perception of sound,actin filament binding
LOC23687857	7027.27	1.10837	0.079658	13.914	5.20476e-44	8.08144e-43	AAEL017437				GO:0005634,GO:0005730,GO:0042254	nucleus,nucleolus,ribosome biogenesis
LOC5572074	456.687	-1.82304	0.131103	-13.9054	5.87134e-44	9.10715e-43	AAEL001725				GO:0003824,GO:0005975	catalytic activity,carbohydrate metabolic process
LOC5574177	297.294	3.2428	0.233256	13.9023	6.12955e-44	9.49799e-43	AAEL019955				GO:0008271,GO:0008272,GO:0015116,GO:0016020,GO:0016021,GO:0055085,GO:1902358	secondary active sulfate transmembrane transporter activity,sulfate transport,sulfate transmembrane transporter activity,membrane,integral component of membrane,transmembrane transport,sulfate transmembrane transport
LOC5571934	532.015	-1.87936	0.135206	-13.8999	6.34083e-44	9.8154e-43	AAEL018178				GO:0016491,GO:0055114	oxidoreductase activity,oxidation-reduction process
LOC5574425	2704.57	-1.48631	0.106979	-13.8934	6.9465e-44	1.0742e-42	AAEL019668				GO:0000166,GO:0004672,GO:0004674,GO:0005524,GO:0006468,GO:0016301,GO:0016310,GO:0016740	nucleotide binding,protein kinase activity,protein serine/threonine kinase activity,ATP binding,protein phosphorylation,kinase activity,phosphorylation,transferase activity
LOC5575535	166.266	3.92343	0.282583	13.8842	7.90011e-44	1.22043e-42	AAEL011905	myosin i [Source:VB Community Annotation]			GO:0000166,GO:0003774,GO:0003779,GO:0005524,GO:0016459	nucleotide binding,motor activity,actin binding,ATP binding,myosin complex
LOC5564692	1512.46	1.85192	0.133442	13.8782	8.59246e-44	1.32604e-42	AAEL004392	IAP-antagonist Michelob_x-like Protein [Source:VB Community Annotation]	IMP
LOC5574509	585.093	-1.62447	0.117109	-13.8715	9.43161e-44	1.45407e-42	AAEL015107				GO:0005789,GO:0006506,GO:0016020,GO:0016021	endoplasmic reticulum membrane,GPI anchor biosynthetic process,membrane,integral component of membrane
LOC5572457	638.171	3.90255	0.281398	13.8684	9.84258e-44	1.5159e-42	AAEL001796	Nuclear hormone receptor (HR78) [Source:VB Community Annotation]			GO:0003677,GO:0003700,GO:0003707,GO:0005634,GO:0006355,GO:0008270,GO:0042025,GO:0043565,GO:0046872	DNA binding,DNA-binding transcription factor activity,steroid hormone receptor activity,nucleus,regulation of transcription, DNA-templated,zinc ion binding,host cell nucleus,sequence-specific DNA binding,metal ion binding
LOC5570241	1181.28	2.2697	0.163742	13.8615	1.08456e-43	1.66868e-42	AAEL008190	bhlh factor math6 (atoh8 protein) (bhlh transcription factor) [Source:VB Community Annotation]			GO:0003700,GO:0006355,GO:0030154,GO:0046983	DNA-binding transcription factor activity,regulation of transcription, DNA-templated,cell differentiation,protein dimerization activity
LOC5576005	721.487	-1.42362	0.102726	-13.8585	1.13027e-43	1.73726e-42	AAEL012247				GO:0004672,GO:0005524,GO:0006468	protein kinase activity,ATP binding,protein phosphorylation
LOC5567294	599.261	-2.12819	0.153624	-13.8533	1.21563e-43	1.86658e-42	AAEL005950	chloride channel protein 2 [Source:VB Community Annotation]			GO:0005247,GO:0006811,GO:0006821,GO:0016020,GO:0016021,GO:0055085,GO:1902476	voltage-gated chloride channel activity,ion transport,chloride transport,membrane,integral component of membrane,transmembrane transport,chloride transmembrane transport
LOC5568233	508.123	2.59245	0.187147	13.8525	1.22904e-43	1.88527e-42	AAEL006667	phosphatidyltransferase [Source:VB Community Annotation]			GO:0008654,GO:0016020,GO:0016021,GO:0016740,GO:0016780	phospholipid biosynthetic process,membrane,integral component of membrane,transferase activity,phosphotransferase activity, for other substituted phosphate groups
LOC5575032	2903.57	-1.17405	0.0847804	-13.8482	1.30499e-43	1.99975e-42	AAEL011584	chaperonin-60kD, ch60 [Source:VB Community Annotation]			GO:0000166,GO:0005524,GO:0005737,GO:0006457,GO:0042026	nucleotide binding,ATP binding,cytoplasm,protein folding,protein refolding
LOC5565667	583.603	-1.85442	0.133984	-13.8406	1.44941e-43	2.21884e-42	AAEL004900	geranylgeranyl pyrophosphate synthase [Source:VB Community Annotation]			GO:0008299,GO:0016740	isoprenoid biosynthetic process,transferase activity
LOC5578143	218.56	3.88271	0.280541	13.8401	1.46053e-43	2.23362e-42	AAEL013526				GO:0016020,GO:0016021	membrane,integral component of membrane
LOC5573673	19358.6	0.985968	0.071282	13.8319	1.63551e-43	2.49871e-42	AAEL019604				GO:0016491,GO:0055114	oxidoreductase activity,oxidation-reduction process
LOC5573380	564.524	-2.52739	0.182803	-13.8258	1.78109e-43	2.71839e-42	AAEL010469
LOC5574341	783.729	-1.39048	0.100593	-13.8228	1.85739e-43	2.83201e-42	AAEL002329	alpha-1,3-mannosyl-glycoprotein beta-1, 2-n-acetylglucosaminyltransferase [Source:VB Community Annotation]			GO:0004812,GO:0006486,GO:0008375,GO:0016020,GO:0016021,GO:0016740,GO:0016757,GO:0046872	aminoacyl-tRNA ligase activity,protein glycosylation,acetylglucosaminyltransferase activity,membrane,integral component of membrane,transferase activity,transferase activity, transferring glycosyl groups,metal ion binding
LOC110680234	279.58	-2.19791	0.15902	-13.8216	1.88932e-43	2.87781e-42	AAEL026780
LOC5563981	126.236	4.51025	0.326443	13.8163	2.03126e-43	3.09093e-42	AAEL004003	glucose dehydrogenase [Source:VB Community Annotation]			GO:0016020,GO:0016021,GO:0016614,GO:0050660,GO:0055114	membrane,integral component of membrane,oxidoreductase activity, acting on CH-OH group of donors,flavin adenine dinucleotide binding,oxidation-reduction process
LOC5570843	5698.33	1.02657	0.0743164	13.8135	2.11432e-43	3.2141e-42	AAEL022467				GO:0000226,GO:0000281,GO:0005634,GO:0005737,GO:0005819,GO:0005874,GO:0040001	microtubule cytoskeleton organization,mitotic cytokinesis,nucleus,cytoplasm,spindle,microtubule,establishment of mitotic spindle localization
LOC5578459	5719.65	1.14712	0.0830814	13.8072	2.30598e-43	3.50197e-42	AAEL000486	chaperonin [Source:VB Community Annotation]			GO:0000166,GO:0005524,GO:0005737,GO:0006457,GO:0051082	nucleotide binding,ATP binding,cytoplasm,protein folding,unfolded protein binding
LOC5577043	331.737	1.97281	0.143077	13.7885	2.98962e-43	4.53565e-42	AAEL026256				GO:0016020,GO:0016021	membrane,integral component of membrane
LOC5571895	514.207	-3.02352	0.219312	-13.7864	3.07856e-43	4.66593e-42	AAEL009380	phospholipase c beta [Source:VB Community Annotation]			GO:0004435,GO:0005509,GO:0006629,GO:0007165,GO:0008081,GO:0016042,GO:0016787,GO:0035556	phosphatidylinositol phospholipase C activity,calcium ion binding,lipid metabolic process,signal transduction,phosphoric diester hydrolase activity,lipid catabolic process,hydrolase activity,intracellular signal transduction
LOC5577501	940.621	-2.15652	0.156553	-13.775	3.603e-43	5.45535e-42	AAEL022637				GO:0005515	protein binding
LOC5575512	5689.21	1.57273	0.11421	13.7705	3.83784e-43	5.80516e-42	AAEL011881				GO:0005515,GO:0046983	protein binding,protein dimerization activity
LOC5578993	464.908	2.19597	0.159497	13.7681	3.96587e-43	5.99286e-42	AAEL003794	homeobox protein nk-2 [Source:VB Community Annotation]			GO:0000981,GO:0003677,GO:0005634,GO:0006355,GO:0006357,GO:0043565	DNA-binding transcription factor activity, RNA polymerase II-specific,DNA binding,nucleus,regulation of transcription, DNA-templated,regulation of transcription by RNA polymerase II,sequence-specific DNA binding
LOC5577673	256.831	3.85293	0.279868	13.767	4.02686e-43	6.079e-42	AAEL013304				GO:0016020,GO:0016021	membrane,integral component of membrane
LOC5568796	461.316	3.6087	0.26214	13.7663	4.0661e-43	6.13216e-42	AAEL028228				GO:0005912	adherens junction
LOC5568580	423.259	-2.42546	0.176207	-13.7648	4.14831e-43	6.24995e-42	AAEL019951				GO:0000166,GO:0004672,GO:0004674,GO:0004697,GO:0004698,GO:0005524,GO:0006468,GO:0008270,GO:0016301,GO:0016310,GO:0016740,GO:0035556	nucleotide binding,protein kinase activity,protein serine/threonine kinase activity,protein kinase C activity,calcium-dependent protein kinase C activity,ATP binding,protein phosphorylation,zinc ion binding,kinase activity,phosphorylation,transferase activity,intracellular signal transduction
LOC5578759	655.41	-1.57143	0.11418	-13.7627	4.27006e-43	6.42703e-42	AAEL003666	leukotriene a-4 hydrolase [Source:VB Community Annotation]			GO:0004177,GO:0004463,GO:0005737,GO:0006508,GO:0008233,GO:0008237,GO:0008270,GO:0016787,GO:0019370,GO:0046872	aminopeptidase activity,leukotriene-A4 hydrolase activity,cytoplasm,proteolysis,peptidase activity,metallopeptidase activity,zinc ion binding,hydrolase activity,leukotriene biosynthetic process,metal ion binding
LOC5573797	2451.06	-1.34565	0.0977889	-13.7608	4.38677e-43	6.59617e-42	AAEL024508				GO:0001503,GO:0003746,GO:0005634,GO:0006357,GO:0006368,GO:0006414,GO:0007155,GO:0070449	ossification,translation elongation factor activity,nucleus,regulation of transcription by RNA polymerase II,transcription elongation from RNA polymerase II promoter,translational elongation,cell adhesion,elongin complex
LOC5567705	2348.54	-1.78814	0.129976	-13.7575	4.59373e-43	6.90056e-42	AAEL006279				GO:0016020,GO:0016021	membrane,integral component of membrane
LOC5573959	1655.07	1.58562	0.11528	13.7545	4.78781e-43	7.18501e-42	AAEL025216				GO:0005096,GO:0005515,GO:0043547,GO:0051056	GTPase activator activity,protein binding,positive regulation of GTPase activity,regulation of small GTPase mediated signal transduction
LOC5565423	3041.11	2.54122	0.18478	13.7527	4.90653e-43	7.35593e-42	AAEL000656	pangolin [Source:VB Community Annotation]			GO:0003677,GO:0005634,GO:0016055	DNA binding,nucleus,Wnt signaling pathway
LOC110680767	321.833	-2.13627	0.155433	-13.744	5.52966e-43	8.27617e-42	AAEL022805
LOC5566872	121.303	3.80623	0.276937	13.744	5.53121e-43	8.27617e-42	AAEL000850	tyrosine kinase receptor [Source:VB Community Annotation]			GO:0004672,GO:0004713,GO:0005509,GO:0005524,GO:0006468,GO:0007156,GO:0016020,GO:0016021,GO:0018108	protein kinase activity,protein tyrosine kinase activity,calcium ion binding,ATP binding,protein phosphorylation,homophilic cell adhesion via plasma membrane adhesion molecules,membrane,integral component of membrane,peptidyl-tyrosine phosphorylation
LOC110681492	109.466	-4.23908	0.308498	-13.741	5.76412e-43	8.60775e-42	AAEL024960
LOC5578979	109.466	-4.23908	0.308498	-13.741	5.76412e-43	8.60775e-42	AAEL021797
LOC5576427	1658.88	-2.07568	0.15114	-13.7335	6.39937e-43	9.54704e-42	AAEL012519	actin binding protein, putative [Source:VB Community Annotation]			GO:0003779,GO:0005737,GO:0005856,GO:0030036	actin binding,cytoplasm,cytoskeleton,actin cytoskeleton organization
LOC5565349	193.397	-2.61149	0.190261	-13.7258	7.11132e-43	1.05988e-41	AAEL021138				GO:0005515	protein binding
LOC5565048	994.189	2.38222	0.173642	13.7191	7.80013e-43	1.1614e-41	AAEL004567	fermitin, putative [Source:VB Community Annotation]			GO:0007155,GO:0007229	cell adhesion,integrin-mediated signaling pathway
LOC5565978	127.511	4.64338	0.339041	13.6956	1.07825e-42	1.6039e-41	AAEL027400				GO:0016020,GO:0016740,GO:0016757	membrane,transferase activity,transferase activity, transferring glycosyl groups
LOC110679706	373.107	-2.29346	0.167534	-13.6895	1.17281e-42	1.74286e-41	AAEL026331
LOC5563957	1253.77	3.25758	0.238039	13.685	1.24741e-42	1.8519e-41	AAEL004002	glucose dehydrogenase [Source:VB Community Annotation]			GO:0016614,GO:0050660,GO:0055114	oxidoreductase activity, acting on CH-OH group of donors,flavin adenine dinucleotide binding,oxidation-reduction process
LOC5571213	271.044	-2.73259	0.199843	-13.6737	1.45792e-42	2.16231e-41	AAEL008909
LOC5570925	464.916	2.51977	0.184408	13.6641	1.66326e-42	2.46447e-41	AAEL001500	insulinprotein enhancer protein isl [Source:VB Community Annotation]			GO:0000981,GO:0003677,GO:0005634,GO:0006355,GO:0006357,GO:0043565,GO:0046872	DNA-binding transcription factor activity, RNA polymerase II-specific,DNA binding,nucleus,regulation of transcription, DNA-templated,regulation of transcription by RNA polymerase II,sequence-specific DNA binding,metal ion binding
LOC5572867	2259.81	1.06428	0.0778933	13.6633	1.68159e-42	2.4892e-41	AAEL010087	26S proteasome alpha 3 subunit [Source:VB Community Annotation]	Prosalpha3		GO:0000502,GO:0004175,GO:0004298,GO:0005634,GO:0005737,GO:0005839,GO:0006508,GO:0006511,GO:0008233,GO:0016787,GO:0019773,GO:0051603	proteasome complex,endopeptidase activity,threonine-type endopeptidase activity,nucleus,cytoplasm,proteasome core complex,proteolysis,ubiquitin-dependent protein catabolic process,peptidase activity,hydrolase activity,proteasome core complex, alpha-subunit complex,proteolysis involved in cellular protein catabolic process
LOC5579514	3338.37	1.04843	0.0767348	13.6631	1.68717e-42	2.49505e-41	AAEL015100	calnexin [Source:VB Community Annotation]			GO:0005509,GO:0005515,GO:0005783,GO:0006457,GO:0016020,GO:0016021,GO:0051082	calcium ion binding,protein binding,endoplasmic reticulum,protein folding,membrane,integral component of membrane,unfolded protein binding
LOC110680362	141.532	4.25658	0.311591	13.6608	1.74053e-42	2.57146e-41	AAEL026577
LOC5567490	1698.43	-1.40812	0.103114	-13.6559	1.86278e-42	2.74941e-41	AAEL000949				GO:0005783,GO:0005789,GO:0016020,GO:0016021,GO:0023041,GO:0030867,GO:0031965	endoplasmic reticulum,endoplasmic reticulum membrane,membrane,integral component of membrane,neuronal signal transduction,rough endoplasmic reticulum membrane,nuclear membrane
LOC5579657	2544.06	-1.64823	0.120703	-13.6552	1.87894e-42	2.77057e-41	AAEL003950	helicase [Source:VB Community Annotation]			GO:0000166,GO:0005524,GO:0005634,GO:0016589,GO:0016887,GO:0043044	nucleotide binding,ATP binding,nucleus,NURF complex,ATPase activity,ATP-dependent chromatin remodeling
LOC5577495	118.828	-5.31615	0.389339	-13.6543	1.90316e-42	2.80358e-41	AAEL003182	Serine Protease Inhibitor (serpin) homologue - unlikely to be inhibitory. [Source:VB Community Annotation]	SRPN26		GO:0004867,GO:0005615,GO:0010466,GO:0010951,GO:0030414	serine-type endopeptidase inhibitor activity,extracellular space,negative regulation of peptidase activity,negative regulation of endopeptidase activity,peptidase inhibitor activity
LOC23687941	1161.78	-1.71808	0.125858	-13.6509	1.99393e-42	2.93445e-41	AAEL019787	CCAP receptor [Source:UniProtKB/TrEMBL;Acc:A0A411JKD0]			GO:0003676,GO:0005634,GO:0046872	nucleic acid binding,nucleus,metal ion binding
LOC5569376	1228.59	-2.56945	0.188434	-13.6358	2.45272e-42	3.60616e-41	AAEL007562				GO:0005789,GO:0015031,GO:0016020,GO:0016021	endoplasmic reticulum membrane,protein transport,membrane,integral component of membrane
LOC5579360	238.271	2.74198	0.201308	13.6208	3.01062e-42	4.42216e-41	AAEL015533				GO:0004252,GO:0006508	serine-type endopeptidase activity,proteolysis
LOC5576242	1017.42	-2.11591	0.155351	-13.6202	3.03857e-42	4.45892e-41	AAEL002835
LOC5571449	1433.08	-1.30579	0.0958728	-13.62	3.04484e-42	4.46381e-41	AAEL009085	rho/rac/cdc GTPase-activating protein [Source:VB Community Annotation]			GO:0007165	signal transduction
LOC5564833	199.605	3.73939	0.274562	13.6195	3.06689e-42	4.49182e-41	AAEL000600	Wnt10a protein, putative [Source:VB Community Annotation]			GO:0005102,GO:0005576,GO:0007275,GO:0016055	signaling receptor binding,extracellular region,multicellular organism development,Wnt signaling pathway
LOC5580267	165.234	-3.52792	0.25925	-13.6082	3.58122e-42	5.24007e-41	AAEL003010				GO:0008270,GO:0046872	zinc ion binding,metal ion binding
LOC5567241	2292.51	-1.6908	0.124255	-13.6075	3.61368e-42	5.28249e-41	AAEL000857				GO:0003676,GO:0005634,GO:0008270,GO:0046872	nucleic acid binding,nucleus,zinc ion binding,metal ion binding
LOC23687533	2405.56	1.69483	0.1246	13.6021	3.88864e-42	5.67898e-41	AAEL017113	H/ACA ribonucleoprotein complex subunit [Source:UniProtKB/TrEMBL;Acc:A0A1S4G5R5]			GO:0001522,GO:0003723,GO:0005634,GO:0005730,GO:0006364,GO:0031429,GO:0042254	pseudouridine synthesis,RNA binding,nucleus,nucleolus,rRNA processing,box H/ACA snoRNP complex,ribosome biogenesis
LOC5579359	1425.17	3.33231	0.24501	13.6007	3.96447e-42	5.78418e-41	AAEL021367				GO:0042302	structural constituent of cuticle
LOC110679707	153.163	5.33404	0.3924	13.5934	4.38405e-42	6.39022e-41	AAEL019767				GO:0004252,GO:0006508	serine-type endopeptidase activity,proteolysis
LOC5573206	3881.67	2.21158	0.162703	13.5927	4.42281e-42	6.44056e-41	AAEL025245				GO:0003676,GO:0005515	nucleic acid binding,protein binding
LOC5567703	240.099	-2.86689	0.21094	-13.591	4.52809e-42	6.58757e-41	AAEL006277				GO:0016020,GO:0016021	membrane,integral component of membrane
LOC5577527	2886.29	1.00819	0.0741937	13.5886	4.67755e-42	6.79851e-41	AAEL005791				GO:0005515,GO:0005634,GO:0005737,GO:0007051	protein binding,nucleus,cytoplasm,spindle organization
LOC5578654	494.059	-1.7045	0.125472	-13.5847	4.93569e-42	7.16687e-41	AAEL024913				GO:0016787	hydrolase activity
LOC110680279	912.812	-2.2988	0.169225	-13.5843	4.96014e-42	7.19552e-41	AAEL024965
LOC5577142	164.119	3.63261	0.267473	13.5812	5.1757e-42	7.50107e-41	AAEL003112				GO:0042302	structural constituent of cuticle
LOC5574210	1037.99	-1.61121	0.118697	-13.5742	5.69678e-42	8.24842e-41	AAEL002317	Insulin-like receptor Precursor (MIR)(EC 2.7.10.1) [Source:VB Community Annotation]	InR		GO:0000166,GO:0004672,GO:0004713,GO:0004714,GO:0005009,GO:0005515,GO:0005524,GO:0005887,GO:0006468,GO:0007169,GO:0008286,GO:0016020,GO:0016021,GO:0016301,GO:0016310,GO:0016740,GO:0018108,GO:0043548,GO:0043559,GO:0043560,GO:0046777,GO:0046872,GO:0071469	nucleotide binding,protein kinase activity,protein tyrosine kinase activity,transmembrane receptor protein tyrosine kinase activity,insulin-activated receptor activity,protein binding,ATP binding,integral component of plasma membrane,protein phosphorylation,transmembrane receptor protein tyrosine kinase signaling pathway,insulin receptor signaling pathway,membrane,integral component of membrane,k…
LOC5570431	161.473	3.6068	0.265997	13.5596	6.95507e-42	1.00607e-40	AAEL008323				GO:0005773,GO:0005774,GO:0005929,GO:0016020,GO:0016021,GO:0042995	vacuole,vacuolar membrane,cilium,membrane,integral component of membrane,cell projection
LOC5573576	1086.54	-1.83805	0.135584	-13.5565	7.25028e-42	1.04778e-40	AAEL002104				GO:0003676,GO:0005634,GO:0008270,GO:0046872	nucleic acid binding,nucleus,zinc ion binding,metal ion binding
LOC5580179	1734.49	-1.46648	0.108195	-13.5541	7.49277e-42	1.0818e-40	AAEL002569	serine/threonine kinase [Source:VB Community Annotation]			GO:0000166,GO:0004672,GO:0004674,GO:0005524,GO:0006468,GO:0016301,GO:0016310,GO:0016740	nucleotide binding,protein kinase activity,protein serine/threonine kinase activity,ATP binding,protein phosphorylation,kinase activity,phosphorylation,transferase activity
LOC5569668	317.528	2.13367	0.157454	13.5511	7.80924e-42	1.12642e-40	AAEL007811	short-chain dehydrogenase [Source:VB Community Annotation]			GO:0005515,GO:0006915,GO:0016055,GO:0055114	protein binding,apoptotic process,Wnt signaling pathway,oxidation-reduction process
LOC5579328	2810.73	1.02987	0.076003	13.5504	7.87584e-42	1.13495e-40	AAEL023188				GO:0005783,GO:0005789,GO:0006486,GO:0006487,GO:0008250,GO:0016020,GO:0016021	endoplasmic reticulum,endoplasmic reticulum membrane,protein glycosylation,protein N-linked glycosylation,oligosaccharyltransferase complex,membrane,integral component of membrane
LOC5569575	920.917	-1.35395	0.0999256	-13.5496	7.96731e-42	1.14705e-40	AAEL007765	Serine Protease Inhibitor (serpin) likely cleavage at K/R. Transcript A. [Source:VB Community Annotation]	SRPN10		GO:0004867,GO:0005615,GO:0010466,GO:0010951,GO:0030414	serine-type endopeptidase inhibitor activity,extracellular space,negative regulation of peptidase activity,negative regulation of endopeptidase activity,peptidase inhibitor activity
LOC5575867	203.043	-3.32913	0.245786	-13.5449	8.49729e-42	1.2222e-40	AAEL021432	Carboxylic ester hydrolase [Source:UniProtKB/TrEMBL;Acc:Q9TX11]			GO:0001507,GO:0003990,GO:0004104,GO:0016020,GO:0016021,GO:0016787,GO:0030054,GO:0042135,GO:0043083,GO:0045202,GO:0052689	acetylcholine catabolic process in synaptic cleft,acetylcholinesterase activity,cholinesterase activity,membrane,integral component of membrane,hydrolase activity,cell junction,neurotransmitter catabolic process,synaptic cleft,synapse,carboxylic ester hydrolase activity
LOC23687567	2289.82	-1.52267	0.112484	-13.5368	9.48486e-42	1.36296e-40	AAEL020259				GO:0004190,GO:0005515,GO:0006508,GO:0008233,GO:0016787	aspartic-type endopeptidase activity,protein binding,proteolysis,peptidase activity,hydrolase activity
LOC5564596	3152.94	-2.81358	0.207935	-13.531	1.02558e-41	1.47235e-40	AAEL019475				GO:0000812,GO:0003713,GO:0005634,GO:0006338,GO:0007219,GO:0016607,GO:0031151,GO:0034729,GO:0043486,GO:0045944,GO:0051726	Swr1 complex,transcription coactivator activity,nucleus,chromatin remodeling,Notch signaling pathway,nuclear speck,histone methyltransferase activity (H3-K79 specific),histone H3-K79 methylation,histone exchange,positive regulation of transcription by RNA polymerase II,regulation of cell cycle
LOC5574865	137.411	-3.217	0.237806	-13.5278	1.07111e-41	1.53627e-40	AAEL011472
LOC5575456	425.865	-2.71652	0.200908	-13.5212	1.17272e-41	1.68042e-40	AAEL011836				GO:0005515	protein binding
LOC110677013	999.703	-1.7032	0.12599	-13.5186	1.21479e-41	1.73907e-40	AAEL026470				GO:0003677,GO:0003697,GO:0003824,GO:0004518,GO:0004519,GO:0004527,GO:0005634,GO:0006281,GO:0006289,GO:0006974,GO:0016787,GO:0016788,GO:0046872,GO:0090305	DNA binding,single-stranded DNA binding,catalytic activity,nuclease activity,endonuclease activity,exonuclease activity,nucleus,DNA repair,nucleotide-excision repair,cellular response to DNA damage stimulus,hydrolase activity,hydrolase activity, acting on ester bonds,metal ion binding,nucleic acid phosphodiester bond hydrolysis
LOC5578957	428.007	-1.70601	0.126215	-13.5167	1.24616e-41	1.78231e-40	AAEL013942	aminoadipate-semialdehyde dehydrogenase [Source:VB Community Annotation]			GO:0000287,GO:0008897,GO:0016740	magnesium ion binding,holo-[acyl-carrier-protein] synthase activity,transferase activity
LOC5567653	192.566	-2.91438	0.215727	-13.5096	1.37298e-41	1.96185e-40	AAEL006241	sugar transporter [Source:VB Community Annotation]			GO:0016020,GO:0016021,GO:0022857,GO:0055085	membrane,integral component of membrane,transmembrane transporter activity,transmembrane transport
LOC5568338	115.913	-4.00869	0.296857	-13.5038	1.48559e-41	2.12076e-40	AAEL001060				GO:0005886,GO:0016020,GO:0016021	plasma membrane,membrane,integral component of membrane
LOC5577095	822.935	-1.8281	0.135438	-13.4978	1.61202e-41	2.29909e-40	AAEL012994	Glucose-6-phosphate isomerase [Source:UniProtKB/TrEMBL;Acc:Q16KI0]			GO:0004347,GO:0006094,GO:0006096,GO:0016853	glucose-6-phosphate isomerase activity,gluconeogenesis,glycolytic process,isomerase activity
LOC5579221	763.488	-1.44104	0.106855	-13.486	1.89072e-41	2.69406e-40	AAEL014059	ancient conserved domain protein 2 (cyclin m2) [Source:VB Community Annotation]			GO:0016020,GO:0016021	membrane,integral component of membrane
LOC5563971	141.932	3.72674	0.276375	13.4844	1.93359e-41	2.75256e-40	AAEL004023	juvenile hormone-inducible protein, putative [Source:VB Community Annotation]
LOC5566318	618.417	-1.50128	0.111357	-13.4817	2.00308e-41	2.84882e-40	AAEL005288				GO:0003676,GO:0008270,GO:0046872,GO:0061630	nucleic acid binding,zinc ion binding,metal ion binding,ubiquitin protein ligase activity
LOC5577721	632.341	-1.91979	0.142421	-13.4797	2.05874e-41	2.92526e-40	AAEL013356				GO:0016020,GO:0016021	membrane,integral component of membrane
LOC5569446	429.386	-2.01666	0.149632	-13.4774	2.12321e-41	3.01404e-40	AAEL001242	ribosomal pseudouridine synthase [Source:VB Community Annotation]			GO:0001522,GO:0003723,GO:0009451,GO:0009982	pseudouridine synthesis,RNA binding,RNA modification,pseudouridine synthase activity
LOC5578564	492.104	-1.956	0.145143	-13.4764	2.15385e-41	3.05469e-40	AAEL013749				GO:0004252,GO:0006508,GO:0016020,GO:0016021	serine-type endopeptidase activity,proteolysis,membrane,integral component of membrane
LOC5572180	5295.07	7.94762	0.589889	13.4731	2.25254e-41	3.19169e-40	AAEL009591	cytochrome P450 [Source:VB Community Annotation]	CYP9M8		GO:0004497,GO:0005506,GO:0016491,GO:0016705,GO:0020037,GO:0046872,GO:0055114	monooxygenase activity,iron ion binding,oxidoreductase activity,oxidoreductase activity, acting on paired donors, with incorporation or reduction of molecular oxygen,heme binding,metal ion binding,oxidation-reduction process
LOC5578356	900.626	-1.51654	0.112579	-13.4709	2.3195e-41	3.28352e-40	AAEL003519				GO:0003700,GO:0005634,GO:0005789,GO:0006355,GO:0030968,GO:0035497,GO:0045944	DNA-binding transcription factor activity,nucleus,endoplasmic reticulum membrane,regulation of transcription, DNA-templated,endoplasmic reticulum unfolded protein response,cAMP response element binding,positive regulation of transcription by RNA polymerase II
LOC5575327	151.107	-3.25463	0.241694	-13.4659	2.48284e-41	3.51147e-40	AAEL020706				GO:0004252,GO:0006508	serine-type endopeptidase activity,proteolysis
LOC5568331	509.45	2.96924	0.220695	13.4541	2.91358e-41	4.11685e-40	AAEL001094				GO:0046872	metal ion binding
LOC5578787	2027.5	-1.56346	0.116281	-13.4455	3.27101e-41	4.61761e-40	AAEL003669	Histone H2A [Source:UniProtKB/TrEMBL;Acc:Q17ER3]			GO:0000786,GO:0003677,GO:0005634,GO:0005694,GO:0046982	nucleosome,DNA binding,nucleus,chromosome,protein heterodimerization activity
LOC5571445	675.187	1.70322	0.126688	13.4442	3.32996e-41	4.69648e-40	AAEL009075				GO:0005637,GO:0016020,GO:0016021	nuclear inner membrane,membrane,integral component of membrane
LOC110681173	253.298	2.26523	0.168541	13.4402	3.51354e-41	4.95081e-40	AAEL024239				GO:0006486,GO:0016020	protein glycosylation,membrane
LOC5571032	421.658	-1.66649	0.124056	-13.4334	3.85417e-41	5.42576e-40	AAEL008761
LOC23687518	153366	-1.71055	0.127354	-13.4315	3.95561e-41	5.56342e-40	AAEL017098				GO:0004497,GO:0004511,GO:0005506,GO:0005737,GO:0009072,GO:0016491,GO:0016714,GO:0042136,GO:0042416,GO:0042423,GO:0046872,GO:0048471,GO:0055114	monooxygenase activity,tyrosine 3-monooxygenase activity,iron ion binding,cytoplasm,aromatic amino acid family metabolic process,oxidoreductase activity,oxidoreductase activity, acting on paired donors, with incorporation or reduction of molecular oxygen, reduced pteridine as one donor, and incorporation of one atom of oxygen,neurotransmitter biosynthetic process,dopamine biosynthetic process,cat…
LOC5574288	1906.69	1.07078	0.0797317	13.4298	4.04611e-41	5.68545e-40	AAEL011049	condensin, XCAP-G'-subunit, putative [Source:VB Community Annotation]			GO:0000796,GO:0005694,GO:0007049,GO:0007076,GO:0030261,GO:0051301	condensin complex,chromosome,cell cycle,mitotic chromosome condensation,chromosome condensation,cell division
LOC5579208	721.045	-1.59988	0.119131	-13.4297	4.05223e-41	5.6888e-40	AAEL014046	sex-determining protein fem-1 [Source:VB Community Annotation]			GO:0005515	protein binding
LOC5564682	533.491	-1.51884	0.1131	-13.4292	4.07781e-41	5.71944e-40	AAEL023664
LOC5573696	180.097	-2.60513	0.19401	-13.4278	4.15589e-41	5.8236e-40	AAEL010684	Trehalose 6-phosphate phosphatase [Source:UniProtKB/TrEMBL;Acc:A0A1S4FR40]			GO:0003824,GO:0004805,GO:0005992,GO:0016311,GO:0016787	catalytic activity,trehalose-phosphatase activity,trehalose biosynthetic process,dephosphorylation,hydrolase activity
LOC5574815	1127.36	1.36583	0.101728	13.4263	4.24156e-41	5.93818e-40	AAEL002488	DEAD box ATP-dependent RNA helicase [Source:VB Community Annotation]			GO:0000166,GO:0003676,GO:0003724,GO:0004386,GO:0004518,GO:0004527,GO:0005515,GO:0005524,GO:0016787,GO:0090305	nucleotide binding,nucleic acid binding,RNA helicase activity,helicase activity,nuclease activity,exonuclease activity,protein binding,ATP binding,hydrolase activity,nucleic acid phosphodiester bond hydrolysis
LOC5565846	742.891	-1.90384	0.141884	-13.4182	4.72839e-41	6.61367e-40	AAEL005035	1,4-dihydroxy-2-naphthoate octaprenyltransferase [Source:UniProtKB/TrEMBL;Acc:Q17BA9]			GO:0004659,GO:0009234,GO:0016020,GO:0016021,GO:0016765	prenyltransferase activity,menaquinone biosynthetic process,membrane,integral component of membrane,transferase activity, transferring alkyl or aryl (other than methyl) groups
LOC5565439	560.318	1.47537	0.11001	13.4113	5.19082e-41	7.25381e-40	AAEL000643	zinc finger protein [Source:VB Community Annotation]			GO:0003676	nucleic acid binding
LOC5568408	1553.9	2.48632	0.185468	13.4057	5.60187e-41	7.82106e-40	AAEL006829	microsomal glutathione s-transferase [Source:VB Community Annotation]			GO:0016020,GO:0016021	membrane,integral component of membrane
LOC110679716	4339.67	1.96145	0.146377	13.4001	6.04174e-41	8.42745e-40	AAEL021278				GO:0007219,GO:0007423	Notch signaling pathway,sensory organ development
LOC110681552	113.099	-4.04985	0.302251	-13.3989	6.13258e-41	8.54634e-40	AAEL023582				GO:0003676,GO:0005634,GO:0008270	nucleic acid binding,nucleus,zinc ion binding
LOC5578196	11307.2	1.75965	0.131455	13.386	7.29914e-41	1.01628e-39	AAEL026652
LOC5573849	3315.4	-2.25865	0.168872	-13.3749	8.4711e-41	1.17837e-39	AAEL010766	inositol triphosphate 3-kinase c [Source:VB Community Annotation]			GO:0016301,GO:0016310,GO:0016740,GO:0032958	kinase activity,phosphorylation,transferase activity,inositol phosphate biosynthetic process
LOC110674159	218.874	-2.31589	0.173171	-13.3734	8.64835e-41	1.20193e-39	AAEL023718				GO:0005515	protein binding
LOC5578822	2118.86	-1.33469	0.0998312	-13.3694	9.12583e-41	1.26713e-39	AAEL013863	phosphatidylinositol-binding clathrin assembly protein [Source:VB Community Annotation]			GO:0005543,GO:0005545,GO:0030136,GO:0030276,GO:0048268	phospholipid binding,1-phosphatidylinositol binding,clathrin-coated vesicle,clathrin binding,clathrin coat assembly
LOC5567596	810.702	-1.41409	0.105804	-13.3652	9.66323e-41	1.34053e-39	AAEL006209	exonuclease [Source:VB Community Annotation]			GO:0003677,GO:0003824,GO:0004518,GO:0004519,GO:0005634,GO:0006281,GO:0006974,GO:0016787,GO:0016788,GO:0035312,GO:0046872,GO:0090305	DNA binding,catalytic activity,nuclease activity,endonuclease activity,nucleus,DNA repair,cellular response to DNA damage stimulus,hydrolase activity,hydrolase activity, acting on ester bonds,5'-3' exodeoxyribonuclease activity,metal ion binding,nucleic acid phosphodiester bond hydrolysis
LOC5572454	1341.92	2.28915	0.171363	13.3585	1.05646e-40	1.46424e-39	AAEL001815				GO:0005515	protein binding
LOC5574500	1492.5	-1.90854	0.142873	-13.3583	1.05984e-40	1.46758e-39	AAEL023902				GO:0005634,GO:0006355,GO:0030374,GO:0046983,GO:1903508	nucleus,regulation of transcription, DNA-templated,nuclear receptor transcription coactivator activity,protein dimerization activity,positive regulation of nucleic acid-templated transcription
LOC5576552	494.643	-1.74037	0.130479	-13.3383	1.38643e-40	1.91808e-39	AAEL012610
LOC5573214	167.906	3.37769	0.253782	13.3094	2.04023e-40	2.82003e-39	AAEL010327	Six/sine homebox transcription factors [Source:UniProtKB/TrEMBL;Acc:A0A1S4FPZ1]			GO:0000981,GO:0003677,GO:0005634,GO:0006355,GO:0006357,GO:0043565	DNA-binding transcription factor activity, RNA polymerase II-specific,DNA binding,nucleus,regulation of transcription, DNA-templated,regulation of transcription by RNA polymerase II,sequence-specific DNA binding
LOC5574895	896.393	-1.36126	0.102352	-13.2998	2.32053e-40	3.20456e-39	AAEL019416				GO:0008270,GO:0046872	zinc ion binding,metal ion binding
LOC5567635	2954.42	1.10189	0.0828571	13.2986	2.35741e-40	3.25254e-39	AAEL006211				GO:0005515	protein binding
LOC5571653	1001.24	-1.4885	0.111946	-13.2966	2.42394e-40	3.34131e-39	AAEL001635				GO:0005515	protein binding
LOC5574638	1435.25	1.27717	0.0961214	13.2871	2.75138e-40	3.78925e-39	AAEL011277	apoptosis stimulating of P53 [Source:VB Community Annotation]			GO:0005515	protein binding
LOC5563635	836.675	-1.29287	0.0973558	-13.2798	3.03222e-40	4.17225e-39	AAEL021256
LOC5564851	7562.74	-2.14598	0.161623	-13.2777	3.11849e-40	4.28708e-39	AAEL000604
LOC5579391	385.035	2.09671	0.158054	13.2658	3.65433e-40	5.01918e-39	AAEL015493				GO:0005737,GO:0005764,GO:0016020,GO:0016021,GO:0048471	cytoplasm,lysosome,membrane,integral component of membrane,perinuclear region of cytoplasm
LOC110681072	921.732	1.26034	0.0950078	13.2656	3.66365e-40	5.02746e-39	AAEL022508				GO:0005515,GO:0005524,GO:0005694,GO:0051276	protein binding,ATP binding,chromosome,chromosome organization
LOC5569180	1430.18	2.47002	0.186298	13.2584	4.03225e-40	5.52829e-39	AAEL007444				GO:0003677,GO:0003700,GO:0005634,GO:0006355	DNA binding,DNA-binding transcription factor activity,nucleus,regulation of transcription, DNA-templated
LOC5565721	154.565	-2.99068	0.225752	-13.2476	4.65739e-40	6.37962e-39	AAEL004957				GO:0016020,GO:0016021	membrane,integral component of membrane
LOC5566390	1176.6	-1.39346	0.105191	-13.2469	4.70012e-40	6.43236e-39	AAEL019882				GO:0003779,GO:0005737,GO:0005856,GO:0005886,GO:0008270,GO:0016020,GO:0042383,GO:0046872	actin binding,cytoplasm,cytoskeleton,plasma membrane,zinc ion binding,membrane,sarcolemma,metal ion binding
LOC110676734	1051.16	-1.7881	0.135008	-13.2444	4.86181e-40	6.64171e-39	AAEL019636	Histone H2B [Source:UniProtKB/TrEMBL;Acc:Q17ES2]
LOC5578778	1051.16	-1.7881	0.135008	-13.2444	4.86181e-40	6.64171e-39	AAEL015683	Histone H2B [Source:UniProtKB/TrEMBL;Acc:Q17ES2]			GO:0000786,GO:0003677,GO:0005634,GO:0005694,GO:0046982	nucleosome,DNA binding,nucleus,chromosome,protein heterodimerization activity
LOC5569281	980.55	-1.41356	0.106757	-13.2409	5.09384e-40	6.95245e-39	AAEL007526	electron transfer flavoprotein-ubiquinone oxidoreductase [Source:VB Community Annotation]			GO:0004174,GO:0016491,GO:0022900,GO:0022904,GO:0046872,GO:0051536,GO:0051539,GO:0055114	electron-transferring-flavoprotein dehydrogenase activity,oxidoreductase activity,electron transport chain,respiratory electron transport chain,metal ion binding,iron-sulfur cluster binding,4 iron, 4 sulfur cluster binding,oxidation-reduction process
LOC5579161	1428.59	-1.36704	0.103263	-13.2384	5.26407e-40	7.17837e-39	AAEL020709				GO:0005887,GO:0016010	integral component of plasma membrane,dystrophin-associated glycoprotein complex
LOC5574448	3184.27	1.98991	0.150331	13.2369	5.37466e-40	7.32261e-39	AAEL019907				GO:0005509,GO:0005886,GO:0007155,GO:0007156,GO:0016020,GO:0016021,GO:0098609	calcium ion binding,plasma membrane,cell adhesion,homophilic cell adhesion via plasma membrane adhesion molecules,membrane,integral component of membrane,cell-cell adhesion
LOC5571738	942.786	-1.47083	0.111206	-13.2261	6.20021e-40	8.43983e-39	AAEL009259
LOC5579269	693.705	-1.47287	0.111372	-13.2247	6.31658e-40	8.59055e-39	AAEL015640	transcription factor IIIA, putative [Source:VB Community Annotation]			GO:0003676	nucleic acid binding
LOC5570792	7550.49	1.28223	0.0970044	13.2183	6.88052e-40	9.34916e-39	AAEL008562				GO:0003676,GO:0005634,GO:0008270,GO:0046872	nucleic acid binding,nucleus,zinc ion binding,metal ion binding
LOC5572188	1026.95	-2.07277	0.156881	-13.2123	7.44794e-40	1.01111e-38	AAEL009596	sterol o-acyltransferase [Source:VB Community Annotation]			GO:0005783,GO:0005789,GO:0008374,GO:0016020,GO:0016021,GO:0016740,GO:0016746	endoplasmic reticulum,endoplasmic reticulum membrane,O-acyltransferase activity,membrane,integral component of membrane,transferase activity,transferase activity, transferring acyl groups
LOC5564589	636.822	-1.55947	0.118049	-13.2104	7.64371e-40	1.03677e-38	AAEL004345	cysteinyl-tRNA synthetase [Source:VB Community Annotation]			GO:0000166,GO:0004812,GO:0004817,GO:0005524,GO:0006412,GO:0006418,GO:0006423,GO:0016874,GO:0046872	nucleotide binding,aminoacyl-tRNA ligase activity,cysteine-tRNA ligase activity,ATP binding,translation,tRNA aminoacylation for protein translation,cysteinyl-tRNA aminoacylation,ligase activity,metal ion binding
LOC110674147	115.661	4.34715	0.329076	13.2102	7.66663e-40	1.03895e-38	AAEL023943				GO:0007165	signal transduction
LOC5573786	348.387	-1.80774	0.136851	-13.2096	7.72644e-40	1.04613e-38	AAEL000282	syntaxin, putative [Source:VB Community Annotation]			GO:0000149,GO:0005737,GO:0006888,GO:0016020,GO:0016192,GO:0097111,GO:0097352	SNARE binding,cytoplasm,endoplasmic reticulum to Golgi vesicle-mediated transport,membrane,vesicle-mediated transport,endoplasmic reticulum-Golgi intermediate compartment organization,autophagosome maturation
LOC5565408	1370.17	2.38156	0.180378	13.2032	8.41254e-40	1.13801e-38	AAEL014846	Innexin [Source:UniProtKB/TrEMBL;Acc:Q16FA3]	inx1		GO:0005886,GO:0005921,GO:0006811,GO:0016020,GO:0016021,GO:0030054	plasma membrane,gap junction,ion transport,membrane,integral component of membrane,cell junction
LOC110679692	1828.72	-2.80405	0.212414	-13.2009	8.66635e-40	1.1713e-38	AAEL021284
LOC5574032	3007.35	-1.03057	0.0780833	-13.1984	8.96349e-40	1.21039e-38	AAEL010877				GO:0005515	protein binding
LOC5578730	929.096	-1.75607	0.1331	-13.1937	9.54287e-40	1.28748e-38	AAEL013839
LOC5570222	311.886	3.32239	0.251851	13.1919	9.77248e-40	1.3173e-38	AAEL008186
LOC5573974	23877.4	1.1089	0.0840631	13.1913	9.84258e-40	1.32557e-38	AAEL010821	60S ribosomal protein LP0 [Source:VB Community Annotation]	RpLP0		GO:0005840,GO:0042254	ribosome,ribosome biogenesis
LOC5573441	1042.39	-1.6523	0.125263	-13.1906	9.94181e-40	1.33775e-38	AAEL010483	oxysterol-binding protein related protein (ORP8) [Source:VB Community Annotation]	ORP8		GO:0006869,GO:0008289,GO:0016020,GO:0016021	lipid transport,lipid binding,membrane,integral component of membrane
LOC5568329	2491.15	-1.12735	0.0854725	-13.1897	1.00644e-39	1.35306e-38	AAEL001099	DEAD box polypeptide [Source:VB Community Annotation]
LOC5573573	904.104	2.47826	0.187905	13.1889	1.01634e-39	1.36515e-38	AAEL002134				GO:0016020,GO:0016021	membrane,integral component of membrane
LOC5571956	161.522	-3.11685	0.23634	-13.188	1.02904e-39	1.381e-38	AAEL009442				GO:0003677,GO:0003700,GO:0006355,GO:0006357	DNA binding,DNA-binding transcription factor activity,regulation of transcription, DNA-templated,regulation of transcription by RNA polymerase II
LOC5576838	2910.66	1.21853	0.0924099	13.1861	1.05485e-39	1.41439e-38	AAEL012826	replication factor a 1, rfa1 [Source:VB Community Annotation]			GO:0003676,GO:0003677,GO:0005634,GO:0006260,GO:0006281,GO:0006310,GO:0046872	nucleic acid binding,DNA binding,nucleus,DNA replication,DNA repair,DNA recombination,metal ion binding
LOC5566877	183.06	3.00291	0.227788	13.1829	1.10007e-39	1.47373e-38	AAEL000811	GPCR Methuselah Family [Source:VB Community Annotation]	GPRMTH7		GO:0016020,GO:0016021	membrane,integral component of membrane
LOC5567217	353.661	-2.27221	0.172452	-13.1759	1.20824e-39	1.61721e-38	AAEL000918	Carboxylic ester hydrolase [Source:UniProtKB/TrEMBL;Acc:A0A1S4EXB7]			GO:0016787,GO:0052689	hydrolase activity,carboxylic ester hydrolase activity
LOC5576765	6176.66	1.11449	0.0846048	13.1729	1.2564e-39	1.6802e-38	AAEL012746	chaperonin [Source:VB Community Annotation]			GO:0000166,GO:0005524,GO:0005737,GO:0006457,GO:0051082	nucleotide binding,ATP binding,cytoplasm,protein folding,unfolded protein binding
LOC5578108	24520.9	-2.42648	0.184237	-13.1704	1.29862e-39	1.73513e-38	AAEL003404
LOC5570661	1385.2	3.28206	0.249209	13.1699	1.30725e-39	1.74513e-38	AAEL008478
LOC110677150	102.099	-4.13262	0.313841	-13.1679	1.34297e-39	1.79125e-38	AAEL023233
LOC5567031	9221.97	-1.7265	0.131122	-13.1671	1.35705e-39	1.80845e-38	AAEL005766	Fructose-bisphosphate aldolase [Source:UniProtKB/TrEMBL;Acc:Q178U8]			GO:0003824,GO:0004332,GO:0006096,GO:0016829	catalytic activity,fructose-bisphosphate aldolase activity,glycolytic process,lyase activity
LOC5566111	454.929	-1.96622	0.149333	-13.1666	1.3654e-39	1.81667e-38	AAEL005204				GO:0016020,GO:0016021,GO:0022857,GO:0055085	membrane,integral component of membrane,transmembrane transporter activity,transmembrane transport
LOC5572333	768.22	-1.70166	0.12924	-13.1666	1.36561e-39	1.81667e-38	AAEL009722	clip-domain serine protease, putative [Source:VB Community Annotation]			GO:0004252,GO:0006508	serine-type endopeptidase activity,proteolysis
LOC5564969	3852.39	-1.40025	0.106353	-13.1661	1.37464e-39	1.8271e-38	AAEL020151
LOC5575942	15686	-2.59012	0.196763	-13.1637	1.42048e-39	1.88637e-38	AAEL024914	Putative synaptic vesicle transporter svop [Source:UniProtKB/TrEMBL;Acc:A0A0P6IYS1]			GO:0016020,GO:0016021,GO:0022857,GO:0055085	membrane,integral component of membrane,transmembrane transporter activity,transmembrane transport
LOC110676327	885.71	-1.33814	0.101685	-13.1596	1.49878e-39	1.98862e-38	AAEL027034				GO:0005347,GO:0055085	ATP transmembrane transporter activity,transmembrane transport
LOC5568632	1271.34	-1.64496	0.125037	-13.1557	1.57728e-39	2.09096e-38	AAEL007026				GO:0016020,GO:0016021	membrane,integral component of membrane
LOC5565651	211.673	3.33831	0.253765	13.1551	1.59005e-39	2.10605e-38	AAEL004905	monocarboxylate transporter [Source:VB Community Annotation]			GO:0016020,GO:0016021,GO:0022857,GO:0055085	membrane,integral component of membrane,transmembrane transporter activity,transmembrane transport
LOC5564603	5821.84	0.977123	0.0742828	13.1541	1.61193e-39	2.13318e-38	AAEL010086	DNA replication licensing factor MCM4 [Source:VB Community Annotation]			GO:0000166,GO:0003677,GO:0003678,GO:0004386,GO:0005524,GO:0005634,GO:0006260,GO:0006270,GO:0016787,GO:0032508,GO:0042555	nucleotide binding,DNA binding,DNA helicase activity,helicase activity,ATP binding,nucleus,DNA replication,DNA replication initiation,hydrolase activity,DNA duplex unwinding,MCM complex
LOC5564544	1833.39	2.69574	0.204969	13.1519	1.65889e-39	2.19342e-38	AAEL004319	epidermal growth factor receptor [Source:VB Community Annotation]			GO:0000166,GO:0004672,GO:0004713,GO:0004714,GO:0005524,GO:0006468,GO:0007169,GO:0016020,GO:0016021,GO:0016301,GO:0016310,GO:0016740,GO:0018108	nucleotide binding,protein kinase activity,protein tyrosine kinase activity,transmembrane receptor protein tyrosine kinase activity,ATP binding,protein phosphorylation,transmembrane receptor protein tyrosine kinase signaling pathway,membrane,integral component of membrane,kinase activity,phosphorylation,transferase activity,peptidyl-tyrosine phosphorylation
LOC5577754	102.903	-3.97891	0.302563	-13.1507	1.68598e-39	2.22731e-38	AAEL018298
LOC5565810	171.073	2.79413	0.212571	13.1444	1.83201e-39	2.41813e-38	AAEL005002	roundabout [Source:VB Community Annotation]			GO:0005515,GO:0005886,GO:0007155,GO:0007411	protein binding,plasma membrane,cell adhesion,axon guidance
LOC110681527	124.897	-5.17326	0.393654	-13.1416	1.90061e-39	2.5065e-38	AAEL021704				GO:0003676,GO:0046872	nucleic acid binding,metal ion binding
LOC5578236	669.127	2.5162	0.191478	13.1409	1.91963e-39	2.52939e-38	AAEL016972				GO:0006869,GO:0007568,GO:0008289	lipid transport,aging,lipid binding
LOC5576634	179.858	2.53958	0.193307	13.1376	2.00542e-39	2.64015e-38	AAEL012654	triacylglycerol lipase, pancreatic [Source:VB Community Annotation]			GO:0004806,GO:0005576,GO:0006629,GO:0046872,GO:0052689	triglyceride lipase activity,extracellular region,lipid metabolic process,metal ion binding,carboxylic ester hydrolase activity
LOC5563810	611.08	1.87082	0.142416	13.1363	2.0403e-39	2.68375e-38	AAEL014144	rapsynoid [Source:VB Community Annotation]			GO:0005515	protein binding
LOC5569534	1172.13	1.80982	0.137802	13.1335	2.11727e-39	2.78259e-38	AAEL007725	reticulocalbin [Source:VB Community Annotation]			GO:0005509,GO:0005576,GO:0005783,GO:0005789,GO:0005794,GO:0016020,GO:0016529,GO:0033018,GO:0042470	calcium ion binding,extracellular region,endoplasmic reticulum,endoplasmic reticulum membrane,Golgi apparatus,membrane,sarcoplasmic reticulum,sarcoplasmic reticulum lumen,melanosome
LOC5571783	5964.71	1.09667	0.0835136	13.1316	2.16921e-39	2.84839e-38	AAEL009320	chaperonin [Source:VB Community Annotation]			GO:0000166,GO:0005524,GO:0005737,GO:0006457,GO:0051082	nucleotide binding,ATP binding,cytoplasm,protein folding,unfolded protein binding
LOC5576268	4524.3	-1.26778	0.0965576	-13.1298	2.22182e-39	2.91497e-38	AAEL012427				GO:0016491,GO:0016620,GO:0055114	oxidoreductase activity,oxidoreductase activity, acting on the aldehyde or oxo group of donors, NAD or NADP as acceptor,oxidation-reduction process
LOC5577548	623.732	-1.7295	0.131727	-13.1295	2.23144e-39	2.92507e-38	AAEL013258				GO:0005737	cytoplasm
LOC5568761	1620.25	1.86924	0.14237	13.1294	2.23471e-39	2.92683e-38	AAEL007114
LOC5573520	964.191	1.51045	0.115129	13.1196	2.54363e-39	3.32857e-38	AAEL010569	chondroitin synthase [Source:VB Community Annotation]			GO:0005794,GO:0008376,GO:0016020,GO:0016021,GO:0016740,GO:0032580	Golgi apparatus,acetylgalactosaminyltransferase activity,membrane,integral component of membrane,transferase activity,Golgi cisterna membrane
LOC5576699	3250.17	0.902617	0.0688005	13.1193	2.5516e-39	3.33613e-38	AAEL012725				GO:0005634	nucleus
LOC5574409	265.278	2.12654	0.162107	13.1181	2.59229e-39	3.38643e-38	AAEL011135	GPN-loop GTPase 3 [Source:UniProtKB/TrEMBL;Acc:Q16QZ2]			GO:0000166,GO:0005525,GO:0016787	nucleotide binding,GTP binding,hydrolase activity
LOC5569077	1636.84	-1.22515	0.0934638	-13.1083	2.95136e-39	3.8522e-38	AAEL001205	ubiquitin protein ligase [Source:VB Community Annotation]			GO:0004842,GO:0005515,GO:0006511,GO:0016567,GO:0061630	ubiquitin-protein transferase activity,protein binding,ubiquitin-dependent protein catabolic process,protein ubiquitination,ubiquitin protein ligase activity
LOC5574864	586.208	1.45896	0.111331	13.1047	3.09473e-39	4.03587e-38	AAEL011465				GO:0016020,GO:0016021	membrane,integral component of membrane
LOC23687673	2892.94	1.80447	0.137729	13.1016	3.22311e-39	4.19969e-38	AAEL014271				GO:0005509	calcium ion binding
LOC5568471	17639.6	1.37535	0.10504	13.0935	3.58699e-39	4.66983e-38	AAEL006885	14-3-3 protein zeta [Source:UniProtKB/Swiss-Prot;Acc:Q1HR36]	14-3-3zeta		GO:0005737,GO:0019904	cytoplasm,protein domain specific binding
LOC5575569	1611.58	1.35863	0.103785	13.0908	3.71591e-39	4.83353e-38	AAEL019785				GO:0000166,GO:0003924,GO:0005096,GO:0005515,GO:0005525,GO:0007165,GO:0016020,GO:0043547,GO:0046872	nucleotide binding,GTPase activity,GTPase activator activity,protein binding,GTP binding,signal transduction,membrane,positive regulation of GTPase activity,metal ion binding
LOC5579484	457.256	-2.17027	0.165804	-13.0894	3.78668e-39	4.9214e-38	AAEL015298				GO:0016020,GO:0016021,GO:0016787	membrane,integral component of membrane,hydrolase activity
LOC110681084	460.664	1.83219	0.140012	13.086	3.96109e-39	5.14368e-38	AAEL021939				GO:0005515,GO:0008270	protein binding,zinc ion binding
LOC5567351	634.555	-1.94554	0.14869	-13.0846	4.03446e-39	5.23449e-38	AAEL021071				GO:0003723,GO:0004812,GO:0004826,GO:0005515	RNA binding,aminoacyl-tRNA ligase activity,phenylalanine-tRNA ligase activity,protein binding
LOC5580057	553.132	-1.6541	0.126446	-13.0814	4.20432e-39	5.45023e-38	AAEL002170	phosphatidylinositol-phosphatidylcholine transfer protein, putative [Source:VB Community Annotation]
LOC5567359	1161.98	-2.36857	0.181266	-13.0668	5.0942e-39	6.5982e-38	AAEL006037				GO:0005515	protein binding
LOC5568717	13538.7	1.23059	0.0942737	13.0534	6.0783e-39	7.86616e-38	AAEL007043				GO:0003677	DNA binding
LOC5574362	131.146	3.51675	0.269457	13.0512	6.2527e-39	8.08498e-38	AAEL011086				GO:0003676	nucleic acid binding
LOC5577574	1070.94	-1.57709	0.120881	-13.0466	6.64235e-39	8.58154e-38	AAEL013278	ga binding protein beta chain (transcription factor e4tf1-47) [Source:VB Community Annotation]			GO:0005515	protein binding
LOC5567110	185.683	2.45998	0.188557	13.0464	6.66627e-39	8.60514e-38	AAEL027459
LOC5568568	1041.33	-1.38017	0.105807	-13.0442	6.85529e-39	8.84164e-38	AAEL001142	Rab gdp/GTP exchange factor [Source:UniProtKB/TrEMBL;Acc:A0A1S4EXX1]			GO:0005096,GO:0007165,GO:0043547	GTPase activator activity,signal transduction,positive regulation of GTPase activity
LOC5578499	1807.71	1.40173	0.107594	13.028	8.48086e-39	1.0929e-37	AAEL021350	Histone H4 [Source:UniProtKB/TrEMBL;Acc:Q16IE4]
LOC5571869	289.6	-2.06372	0.158473	-13.0226	9.10768e-39	1.17268e-37	AAEL021624				GO:0005623,GO:0006662,GO:0015035,GO:0045454,GO:0055114	obsolete cell,glycerol ether metabolic process,protein disulfide oxidoreductase activity,cell redox homeostasis,oxidation-reduction process
LOC5568228	2385.57	2.62759	0.201788	13.0215	9.23301e-39	1.18781e-37	AAEL006649	tnf receptor associated factor [Source:VB Community Annotation]			GO:0005515,GO:0005737,GO:0007165,GO:0007250,GO:0008270,GO:0042981,GO:0046330,GO:0046872	protein binding,cytoplasm,signal transduction,activation of NF-kappaB-inducing kinase activity,zinc ion binding,regulation of apoptotic process,positive regulation of JNK cascade,metal ion binding
LOC5567893	317.601	-2.50566	0.192533	-13.0142	1.01585e-38	1.30577e-37	AAEL006338	sulfotransferase (sult) [Source:VB Community Annotation]			GO:0008146,GO:0016740	sulfotransferase activity,transferase activity
LOC5570969	3348.88	-2.13175	0.163819	-13.0128	1.03455e-38	1.3287e-37	AAEL020655				GO:0004672,GO:0005524,GO:0006468	protein kinase activity,ATP binding,protein phosphorylation
LOC5580190	2914.24	-1.33918	0.102982	-13.0041	1.15956e-38	1.48799e-37	AAEL002548	tuberous sclerosis 1 [Source:VB Community Annotation]	Tsc1		GO:0016020,GO:0016021	membrane,integral component of membrane
LOC5564537	459.294	-1.64126	0.126254	-12.9996	1.22963e-38	1.57658e-37	AAEL014507	peptide n-glycanase (pngase) [Source:VB Community Annotation]			GO:0000224,GO:0005737,GO:0006516,GO:0016787	peptide-N4-(N-acetyl-beta-glucosaminyl)asparagine amidase activity,cytoplasm,glycoprotein catabolic process,hydrolase activity
LOC5567636	1931.96	2.71851	0.209242	12.9922	1.3551e-38	1.73598e-37	AAEL024235				GO:0001726,GO:0003779,GO:0005200,GO:0005737,GO:0005856,GO:0005925,GO:0006897,GO:0007010,GO:0007016,GO:0007155,GO:0016020,GO:0030276,GO:0051015	ruffle,actin binding,structural constituent of cytoskeleton,cytoplasm,cytoskeleton,focal adhesion,endocytosis,cytoskeleton organization,obsolete cytoskeletal anchoring at plasma membrane,cell adhesion,membrane,clathrin binding,actin filament binding
LOC23687519	305.622	-1.90773	0.146849	-12.9911	1.37383e-38	1.7585e-37	AAEL024602
LOC5576501	1827.75	1.40087	0.107834	12.9909	1.37737e-38	1.76155e-37	AAEL012552	NADH-ubiquinone oxidoreductase [Source:VB Community Annotation]			GO:0005743,GO:0008137,GO:0009055,GO:0016020,GO:0016491,GO:0016651,GO:0042773,GO:0046872,GO:0051536,GO:0051539,GO:0055114	mitochondrial inner membrane,NADH dehydrogenase (ubiquinone) activity,electron transfer activity,membrane,oxidoreductase activity,oxidoreductase activity, acting on NAD(P)H,ATP synthesis coupled electron transport,metal ion binding,iron-sulfur cluster binding,4 iron, 4 sulfur cluster binding,oxidation-reduction process
LOC5572925	726.11	-1.54116	0.118659	-12.9882	1.42837e-38	1.82524e-37	AAEL010143	isocitrate dehydrogenase [Source:VB Community Annotation]			GO:0000287,GO:0004449,GO:0005739,GO:0006099,GO:0016616,GO:0051287,GO:0055114	magnesium ion binding,isocitrate dehydrogenase (NAD+) activity,mitochondrion,tricarboxylic acid cycle,oxidoreductase activity, acting on the CH-OH group of donors, NAD or NADP as acceptor,NAD binding,oxidation-reduction process
LOC5572046	248.826	2.58349	0.198942	12.9862	1.46573e-38	1.87141e-37	AAEL000227	Class B Scavenger Receptor (CD36 domain). [Source:VB Community Annotation]	SCRB8		GO:0005886,GO:0016020,GO:0016021	plasma membrane,membrane,integral component of membrane
LOC5568302	8108.79	1.68861	0.130043	12.985	1.48764e-38	1.8978e-37	AAEL006741
LOC110675562	276.585	-1.90914	0.147033	-12.9844	1.49935e-38	1.91114e-37	AAEL027087				GO:0016274,GO:0018216	protein-arginine N-methyltransferase activity,peptidyl-arginine methylation
LOC5566202	454.137	-1.74161	0.134173	-12.9804	1.58152e-38	2.01419e-37	AAEL025488				GO:0046872	metal ion binding
LOC5571284	1823.32	-1.1506	0.0886649	-12.9769	1.65438e-38	2.10523e-37	AAEL001540	ubiquitin specific protease [Source:VB Community Annotation]			GO:0004843,GO:0006511,GO:0016579,GO:0036459	thiol-dependent ubiquitin-specific protease activity,ubiquitin-dependent protein catabolic process,protein deubiquitination,thiol-dependent ubiquitinyl hydrolase activity
LOC110681558	607.406	3.46007	0.266658	12.9757	1.6811e-38	2.13743e-37	AAEL004564
LOC5566025	583.706	-1.61787	0.124776	-12.9662	1.90139e-38	2.41551e-37	AAEL020071				GO:0046872	metal ion binding
LOC5566943	210.922	-3.61641	0.279051	-12.9597	2.07114e-38	2.62896e-37	AAEL015285
LOC5568743	1621.36	2.61702	0.202036	12.9532	2.25222e-38	2.85644e-37	AAEL007092	Phospholipase B-like [Source:UniProtKB/TrEMBL;Acc:Q0IF22]			GO:0004620,GO:0006629,GO:0016020,GO:0016021,GO:0016042,GO:0016787	phospholipase activity,lipid metabolic process,membrane,integral component of membrane,lipid catabolic process,hydrolase activity
LOC5564280	233.858	-2.41904	0.186778	-12.9514	2.30717e-38	2.9237e-37	AAEL014380				GO:0008270	zinc ion binding
LOC5571084	887.811	2.26571	0.17508	12.941	2.64106e-38	3.34402e-37	AAEL008789	apolipophorin-III, putative [Source:VB Community Annotation]			GO:0005576,GO:0006869,GO:0008289	extracellular region,lipid transport,lipid binding
LOC5567882	462.081	2.53155	0.195637	12.94	2.67474e-38	3.38385e-37	AAEL006341
LOC5565409	11097.6	2.80709	0.216954	12.9386	2.72419e-38	3.44355e-37	AAEL014847	Innexin [Source:UniProtKB/TrEMBL;Acc:Q16FA2]	inx2		GO:0005886,GO:0005921,GO:0006811,GO:0016020,GO:0016021,GO:0030054	plasma membrane,gap junction,ion transport,membrane,integral component of membrane,cell junction
LOC5570707	437.307	-1.78855	0.138238	-12.9382	2.73966e-38	3.46024e-37	AAEL001446	testis-specific protein pbs13 (t-complex 11 ) [Source:VB Community Annotation]
LOC5566419	255.322	-2.01601	0.155854	-12.9353	2.84643e-38	3.59211e-37	AAEL005388				GO:0000290	deadenylation-dependent decapping of nuclear-transcribed mRNA
LOC5574293	2811.53	-1.67626	0.129594	-12.9347	2.86924e-38	3.6179e-37	AAEL021092				GO:0003712,GO:0005634,GO:0006357,GO:0030274	transcription coregulator activity,nucleus,regulation of transcription by RNA polymerase II,LIM domain binding
LOC5578341	1238.79	-1.17026	0.090514	-12.929	3.08796e-38	3.89047e-37	AAEL003535
LOC5568492	355.878	-2.16793	0.167743	-12.9241	3.29188e-38	4.14397e-37	AAEL006900
LOC5573952	413.834	1.67765	0.130008	12.9042	4.26266e-38	5.36159e-37	AAEL002225	5-oxoprolyl-peptidase, putative [Source:VB Community Annotation]			GO:0005737,GO:0005829,GO:0006508,GO:0008233,GO:0008234,GO:0016787,GO:0016920	cytoplasm,cytosol,proteolysis,peptidase activity,cysteine-type peptidase activity,hydrolase activity,pyroglutamyl-peptidase activity
LOC5572322	390.269	-2.01214	0.156131	-12.8875	5.29219e-38	6.65104e-37	AAEL009709
LOC5576578	115.592	-3.67195	0.285141	-12.8777	6.01032e-38	7.54734e-37	AAEL002932
LOC5568245	487.76	-2.78115	0.216016	-12.8747	6.24655e-38	7.83751e-37	AAEL006675	RNA-binding protein, putative [Source:UniProtKB/TrEMBL;Acc:A0A1S4FEF6]			GO:0003676,GO:0003723,GO:1990904	nucleic acid binding,RNA binding,ribonucleoprotein complex
LOC5580262	19088.2	1.0762	0.0836129	12.8712	6.53863e-38	8.19724e-37	AAEL018244	DNA topoisomerase 2 [Source:UniProtKB/TrEMBL;Acc:A0A1S4G770]			GO:0000166,GO:0003677,GO:0003916,GO:0003918,GO:0005524,GO:0006259,GO:0006265,GO:0016853,GO:0046872	nucleotide binding,DNA binding,DNA topoisomerase activity,DNA topoisomerase type II (double strand cut, ATP-hydrolyzing) activity,ATP binding,DNA metabolic process,DNA topological change,isomerase activity,metal ion binding
LOC5567781	146.758	4.7184	0.366635	12.8695	6.68352e-38	8.37198e-37	AAEL000119	AMP dependent coa ligase [Source:VB Community Annotation]			GO:0003824	catalytic activity
LOC5577039	280.07	-1.93054	0.150059	-12.8652	7.06495e-38	8.8425e-37	AAEL012955	phosphatidylethanolamine-binding protein [Source:VB Community Annotation]
LOC5563900	626.855	1.83668	0.14277	12.8647	7.11492e-38	8.89774e-37	AAEL003989	GTP-binding protein alpha subunit, gna [Source:VB Community Annotation]			GO:0003924,GO:0005525,GO:0007165,GO:0007186,GO:0019001,GO:0031683	GTPase activity,GTP binding,signal transduction,G protein-coupled receptor signaling pathway,guanyl nucleotide binding,G-protein beta/gamma-subunit complex binding
LOC5572175	1189.45	-1.5884	0.12353	-12.8584	7.71189e-38	9.63639e-37	AAEL009586
LOC5572265	6339.85	1.18652	0.0922968	12.8555	8.0098e-38	1.00004e-36	AAEL001769	DEAD box ATP-dependent RNA helicase [Source:VB Community Annotation]			GO:0000166,GO:0003676,GO:0003724,GO:0004386,GO:0005524,GO:0016787	nucleotide binding,nucleic acid binding,RNA helicase activity,helicase activity,ATP binding,hydrolase activity
LOC5577674	642.73	-1.35148	0.105289	-12.836	1.0312e-37	1.28642e-36	AAEL018259				GO:0003677,GO:0003684,GO:0005634,GO:0006281,GO:0006289,GO:0006974	DNA binding,damaged DNA binding,nucleus,DNA repair,nucleotide-excision repair,cellular response to DNA damage stimulus
LOC5579337	472.912	-1.59595	0.124389	-12.8303	1.10985e-37	1.38341e-36	AAEL019957				GO:0006508,GO:0006751,GO:0036374	proteolysis,glutathione catabolic process,glutathione hydrolase activity
LOC5571877	3471.23	-1.16313	0.0906616	-12.8294	1.12255e-37	1.39809e-36	AAEL009364	cdc2l5 [Source:VB Community Annotation]			GO:0000166,GO:0004672,GO:0004674,GO:0005524,GO:0006468	nucleotide binding,protein kinase activity,protein serine/threonine kinase activity,ATP binding,protein phosphorylation
LOC5574675	227.274	2.23228	0.174016	12.828	1.14246e-37	1.42173e-36	AAEL011313	Epoxide hydrolase [Source:UniProtKB/TrEMBL;Acc:Q16QD7]			GO:0003824,GO:0005783,GO:0005789,GO:0016020,GO:0016787,GO:0019439,GO:0033961	catalytic activity,endoplasmic reticulum,endoplasmic reticulum membrane,membrane,hydrolase activity,aromatic compound catabolic process,cis-stilbene-oxide hydrolase activity
LOC5567753	588.333	2.32309	0.181138	12.825	1.18788e-37	1.47704e-36	AAEL000152				GO:0005737,GO:0030030	cytoplasm,cell projection organization
LOC5573193	217.944	-2.31941	0.180877	-12.8231	1.21688e-37	1.51187e-36	AAEL002019				GO:0005515,GO:0005739,GO:0034551	protein binding,mitochondrion,mitochondrial respiratory chain complex III assembly
LOC5568405	659.266	1.83773	0.143332	12.8215	1.24217e-37	1.54203e-36	AAEL006832	GPCR Frizzled/Smoothened Family [Source:VB Community Annotation]	GPRFZ3		GO:0004888,GO:0005515,GO:0007166,GO:0016020,GO:0016021	transmembrane signaling receptor activity,protein binding,cell surface receptor signaling pathway,membrane,integral component of membrane
LOC5577427	2125.23	-1.71305	0.13363	-12.8194	1.27683e-37	1.58376e-36	AAEL027111				GO:0004672,GO:0005524,GO:0006468,GO:0035556	protein kinase activity,ATP binding,protein phosphorylation,intracellular signal transduction
LOC5578097	124.055	3.86958	0.3021	12.8089	1.461e-37	1.81074e-36	AAEL003436	transcription factor coe3 [Source:VB Community Annotation]			GO:0003677,GO:0003700,GO:0005634,GO:0006355,GO:0007275,GO:0046872,GO:0046983	DNA binding,DNA-binding transcription factor activity,nucleus,regulation of transcription, DNA-templated,multicellular organism development,metal ion binding,protein dimerization activity
LOC5580329	17591.3	1.14565	0.0894548	12.807	1.49758e-37	1.85456e-36	AAEL013069	guanine nucleotide-binding protein subunit beta-like protein [Source:VB Community Annotation]	Rack1		GO:0005515,GO:0016301,GO:0016310	protein binding,kinase activity,phosphorylation
LOC5571607	199.731	-2.56962	0.200687	-12.8041	1.55481e-37	1.92387e-36	AAEL009198				GO:0016020,GO:0016021,GO:0022857,GO:0055085	membrane,integral component of membrane,transmembrane transporter activity,transmembrane transport
LOC5564467	441.672	-2.50933	0.196039	-12.8002	1.63596e-37	2.02264e-36	AAEL004269	hippocalcin [Source:VB Community Annotation]			GO:0005509	calcium ion binding
LOC5570883	266.724	3.82395	0.298808	12.7973	1.69661e-37	2.09593e-36	AAEL008658	leucine-rich immune protein (TM) [Source:VB Community Annotation]	LRIM16		GO:0005515,GO:0016020,GO:0016021	protein binding,membrane,integral component of membrane
LOC5570366	229.225	-2.40647	0.188052	-12.7968	1.70781e-37	2.10806e-36	AAEL008274				GO:0005515	protein binding
LOC5573409	1737.4	-1.37221	0.1073	-12.7885	1.90131e-37	2.345e-36	AAEL026571
LOC5568418	3766.94	-1.40943	0.110238	-12.7853	1.98063e-37	2.44086e-36	AAEL006847	Defective in cullin neddylation protein [Source:UniProtKB/TrEMBL;Acc:Q174N9]
LOC5565550	794.782	-1.86763	0.146086	-12.7845	2.00226e-37	2.46551e-36	AAEL004854				GO:0005634,GO:0005737	nucleus,cytoplasm
LOC5568594	432.737	2.53852	0.198634	12.7799	2.1233e-37	2.61245e-36	AAEL001116				GO:0006355	regulation of transcription, DNA-templated
LOC5578071	189.427	3.86717	0.302609	12.7794	2.13673e-37	2.62685e-36	AAEL013504	T-box transcription factor tbx6 [Source:UniProtKB/TrEMBL;Acc:A0A1S4FZR2]			GO:0003677,GO:0003700,GO:0005634,GO:0006355	DNA binding,DNA-binding transcription factor activity,nucleus,regulation of transcription, DNA-templated
LOC5568091	1758.21	2.76147	0.216184	12.7737	2.2992e-37	2.8243e-36	AAEL006522	turtle protein, isoform [Source:VB Community Annotation]			GO:0005515,GO:0016020,GO:0016021	protein binding,membrane,integral component of membrane
LOC5576325	143.843	3.05417	0.239168	12.77	2.41282e-37	2.96148e-36	AAEL027096				GO:0003700,GO:0006355	DNA-binding transcription factor activity,regulation of transcription, DNA-templated
LOC5567237	1791.68	1.54253	0.120836	12.7655	2.55546e-37	3.13404e-36	AAEL000874	Apaf-1 Related Killer [Source:VB Community Annotation]	ARK		GO:0005515,GO:0043531	protein binding,ADP binding
LOC5578803	886.797	-1.57101	0.123111	-12.7609	2.70994e-37	3.32082e-36	AAEL020547				GO:0004252,GO:0006508,GO:0008233,GO:0008236,GO:0016020,GO:0016021,GO:0016787	serine-type endopeptidase activity,proteolysis,peptidase activity,serine-type peptidase activity,membrane,integral component of membrane,hydrolase activity
LOC5579867	4623.84	-1.13911	0.0892873	-12.7578	2.81874e-37	3.45137e-36	AAEL026846				GO:0003743,GO:0005634,GO:0005669,GO:0006351,GO:0006352,GO:0006355,GO:0006413,GO:0046982	translation initiation factor activity,nucleus,transcription factor TFIID complex,transcription, DNA-templated,DNA-templated transcription, initiation,regulation of transcription, DNA-templated,translational initiation,protein heterodimerization activity
LOC5572474	510.054	1.48399	0.116357	12.7537	2.97229e-37	3.63646e-36	AAEL009810	sideroflexin 1,2,3 [Source:VB Community Annotation]			GO:0005739,GO:0006811,GO:0006865,GO:0015075,GO:0016020,GO:0016021,GO:0031966,GO:0034220,GO:0055085	mitochondrion,ion transport,amino acid transport,ion transmembrane transporter activity,membrane,integral component of membrane,mitochondrial membrane,ion transmembrane transport,transmembrane transport
LOC5578317	1428.87	-2.2813	0.178895	-12.7522	3.02974e-37	3.70377e-36	AAEL013635				GO:0003676,GO:0006508,GO:0008233,GO:0008234	nucleic acid binding,proteolysis,peptidase activity,cysteine-type peptidase activity
LOC5570597	612.315	-1.68003	0.131974	-12.73	4.02732e-37	4.91934e-36	AAEL008412	Mitochondrial import inner membrane translocase subunit TIM44 [Source:UniProtKB/TrEMBL;Acc:Q16YW1]			GO:0005739,GO:0005743,GO:0015031,GO:0016020,GO:0030150,GO:0051087	mitochondrion,mitochondrial inner membrane,protein transport,membrane,protein import into mitochondrial matrix,chaperone binding
LOC5568274	2159.9	-1.95361	0.153583	-12.7202	4.56453e-37	5.57106e-36	AAEL022413				GO:0003676,GO:0003723	nucleic acid binding,RNA binding
LOC5576948	128.227	4.1424	0.325668	12.7197	4.59521e-37	5.60402e-36	AAEL019658				GO:0005509,GO:0016020,GO:0016021	calcium ion binding,membrane,integral component of membrane
LOC5571149	1244.61	-1.10698	0.087034	-12.719	4.64034e-37	5.65453e-36	AAEL022773
LOC5568630	157.647	-2.62403	0.206331	-12.7176	4.72336e-37	5.75109e-36	AAEL006985	dopachrome-conversion enzyme (DCE), putative [Source:VB Community Annotation]			GO:0042438,GO:0060179	melanin biosynthetic process,male mating behavior
LOC5574115	486.872	-2.42571	0.190806	-12.713	5.00909e-37	6.09412e-36	AAEL002253	beta-1,3-n-acetylglucosaminyltransferase radical fringe (o-fucosylpeptide 3-beta-n-acetylglucosaminyltransferase) [Source:VB Community Annotation]			GO:0016020,GO:0016021,GO:0016757	membrane,integral component of membrane,transferase activity, transferring glycosyl groups
LOC5564929	1575.13	2.419	0.190281	12.7128	5.02219e-37	6.10518e-36	AAEL004488				GO:0016020	membrane
LOC110680917	138.847	3.00287	0.236213	12.7126	5.03482e-37	6.11566e-36	AAEL027984				GO:0004252,GO:0006508	serine-type endopeptidase activity,proteolysis
LOC5571426	126.917	3.38434	0.2663	12.7088	5.28614e-37	6.41582e-36	AAEL009056				GO:0003677,GO:0005634	DNA binding,nucleus
LOC5565069	115.15	-4.0582	0.319356	-12.7075	5.37557e-37	6.51916e-36	AAEL004572				GO:0003677,GO:0005634	DNA binding,nucleus
LOC110674823	402.496	2.18297	0.171821	12.7049	5.55416e-37	6.73038e-36	AAEL021179				GO:0006144,GO:0033971	purine nucleobase metabolic process,hydroxyisourate hydrolase activity
LOC5575514	3379.12	-2.28008	0.179502	-12.7022	5.74742e-37	6.95903e-36	AAEL011892	receptor for activated C kinase, putative [Source:VB Community Annotation]			GO:0005515	protein binding
LOC5579145	930.703	1.80442	0.1421	12.6983	6.04491e-37	7.31343e-36	AAEL014021	mediator of RNA polymerase II transcription subunit 23 (Med23) [Source:VB Community Annotation]	Med23		GO:0005634	nucleus
LOC5572648	499.256	-2.05686	0.162027	-12.6945	6.34069e-37	7.66519e-36	AAEL001843	ski oncogene [Source:VB Community Annotation]			GO:0046332	SMAD binding
LOC5563579	770.706	-1.3039	0.102744	-12.6907	6.65839e-37	8.04287e-36	AAEL000088	brefeldin A-sensitive peripheral Golgi protein, putative [Source:VB Community Annotation]			GO:0005794,GO:0007030,GO:0015031,GO:0016020	Golgi apparatus,Golgi organization,protein transport,membrane
LOC5575930	3271.26	1.85176	0.146019	12.6817	7.47228e-37	9.01884e-36	AAEL012178				GO:0005515,GO:0008270	protein binding,zinc ion binding
LOC5568344	2967.02	1.52154	0.119984	12.6812	7.52058e-37	9.06995e-36	AAEL019499				GO:0005515,GO:0006355,GO:0046983	protein binding,regulation of transcription, DNA-templated,protein dimerization activity
LOC5571940	1857.2	2.15885	0.170251	12.6804	7.59403e-37	9.15129e-36	AAEL009423	Class B Scavenger Receptor (CD36 domain). [Source:VB Community Annotation]	SCRBQ2		GO:0005886,GO:0016020,GO:0016021	plasma membrane,membrane,integral component of membrane
LOC5569847	900.962	-1.49401	0.117847	-12.6775	7.87716e-37	9.48497e-36	AAEL007962	glutathione transferase [Source:VB Community Annotation]	GSTE4		GO:0005515,GO:0016740	protein binding,transferase activity
LOC5565797	359.18	-2.59813	0.204983	-12.6749	8.14877e-37	9.80428e-36	AAEL005000				GO:0005634	nucleus
LOC5579263	7161.09	1.29523	0.102272	12.6645	9.29598e-37	1.11757e-35	AAEL011873	ubiquitin-conjugating enzyme variant 1A [Source:VB Community Annotation]	Uev1A
LOC5577615	251.023	-1.91847	0.151525	-12.661	9.71925e-37	1.16754e-35	AAEL028088				GO:0005515	protein binding
LOC5568030	1145.16	1.17234	0.0926187	12.6577	1.01447e-36	1.21768e-35	AAEL006469	RNA cytidine acetyltransferase [Source:UniProtKB/TrEMBL;Acc:Q176B3]			GO:0000154,GO:0000166,GO:0005524,GO:0005634,GO:0005730,GO:0006364,GO:0008033,GO:0008080,GO:0016072,GO:0016740,GO:0016746,GO:0034470,GO:0042274,GO:0051391	rRNA modification,nucleotide binding,ATP binding,nucleus,nucleolus,rRNA processing,tRNA processing,N-acetyltransferase activity,rRNA metabolic process,transferase activity,transferase activity, transferring acyl groups,ncRNA processing,ribosomal small subunit biogenesis,tRNA acetylation
LOC5567579	146.576	2.86925	0.227038	12.6378	1.30712e-36	1.56772e-35	AAEL006178
LOC5569142	2540.19	1.07483	0.0850613	12.6359	1.3386e-36	1.60421e-35	AAEL007404
LOC5574373	1036.75	1.25414	0.0993122	12.6282	1.47612e-36	1.76763e-35	AAEL011103	centromere/kinetochore protein zw10 [Source:VB Community Annotation]			GO:0000278,GO:0000775,GO:0000776,GO:0000777,GO:0005634,GO:0005694,GO:0005737,GO:0007049,GO:0051301	mitotic cell cycle,chromosome, centromeric region,kinetochore,condensed chromosome kinetochore,nucleus,chromosome,cytoplasm,cell cycle,cell division
LOC5565339	1115.46	-1.98028	0.156867	-12.624	1.55801e-36	1.86423e-35	AAEL014825				GO:0006915	apoptotic process
LOC5566542	642.729	-1.87199	0.148306	-12.6225	1.58771e-36	1.89827e-35	AAEL005477	amidase [Source:VB Community Annotation]			GO:0005739	mitochondrion
LOC5565121	1010.23	-1.29117	0.102316	-12.6194	1.65147e-36	1.97295e-35	AAEL014732				GO:0005515,GO:0006986,GO:0016020,GO:0016021	protein binding,response to unfolded protein,membrane,integral component of membrane
LOC5578206	941.093	1.25978	0.0998582	12.6157	1.72946e-36	2.06451e-35	AAEL003477	peptidyl-prolyl cis-trans isomerase h, ppih [Source:VB Community Annotation]			GO:0000413,GO:0003755,GO:0006457,GO:0016853	protein peptidyl-prolyl isomerization,peptidyl-prolyl cis-trans isomerase activity,protein folding,isomerase activity
LOC5572422	319.511	3.39554	0.269161	12.6153	1.73938e-36	2.07473e-35	AAEL001809
LOC5567364	1766.75	-2.6137	0.207235	-12.6123	1.80727e-36	2.15401e-35	AAEL006035				GO:0003746,GO:0005634,GO:0006368,GO:0006414,GO:0008023	translation elongation factor activity,nucleus,transcription elongation from RNA polymerase II promoter,translational elongation,transcription elongation factor complex
LOC5568284	1964.47	1.2332	0.0977845	12.6114	1.82761e-36	2.17656e-35	AAEL006711				GO:0005739,GO:0005740,GO:0016020,GO:0016021,GO:0043065	mitochondrion,mitochondrial envelope,membrane,integral component of membrane,positive regulation of apoptotic process
LOC5570349	499.852	-1.47099	0.116678	-12.6072	1.92675e-36	2.29283e-35	AAEL001359
LOC5578985	257.207	-2.80533	0.222618	-12.6015	2.07043e-36	2.46189e-35	AAEL003797
LOC5570073	1838.71	-2.24693	0.178362	-12.5976	2.17718e-36	2.58681e-35	AAEL001357				GO:0046872	metal ion binding
LOC5572840	5650.39	1.11421	0.0884475	12.5974	2.18266e-36	2.59129e-35	AAEL010063	chaperonin [Source:VB Community Annotation]			GO:0000166,GO:0005524,GO:0005737,GO:0006457,GO:0051082	nucleotide binding,ATP binding,cytoplasm,protein folding,unfolded protein binding
LOC110673996	5362.88	-1.16318	0.0923826	-12.5909	2.37012e-36	2.81166e-35	AAEL022067
LOC5569978	3720.98	2.61073	0.207431	12.5861	2.51954e-36	2.98658e-35	AAEL008069	notch [Source:VB Community Annotation]			GO:0005509,GO:0005515,GO:0006508,GO:0008236,GO:0016020,GO:0016021	calcium ion binding,protein binding,proteolysis,serine-type peptidase activity,membrane,integral component of membrane
LOC5573979	317.707	-1.99838	0.15882	-12.5826	2.63139e-36	3.11674e-35	AAEL010822	sulphate transporter [Source:VB Community Annotation]			GO:0008271,GO:0008272,GO:0015116,GO:0016020,GO:0016021,GO:0055085,GO:1902358	secondary active sulfate transmembrane transporter activity,sulfate transport,sulfate transmembrane transporter activity,membrane,integral component of membrane,transmembrane transport,sulfate transmembrane transport
LOC5568600	1911.74	-1.23946	0.0985142	-12.5816	2.66619e-36	3.1555e-35	AAEL001102	adenosine kinase [Source:VB Community Annotation]			GO:0004001,GO:0006166,GO:0016301,GO:0016310,GO:0016740,GO:0016773,GO:0044209	adenosine kinase activity,purine ribonucleoside salvage,kinase activity,phosphorylation,transferase activity,phosphotransferase activity, alcohol group as acceptor,AMP salvage
LOC23687839	26088.3	0.823541	0.0654985	12.5734	2.95628e-36	3.49612e-35	AAEL017419				GO:0003676,GO:0008270	nucleic acid binding,zinc ion binding
LOC5572656	127.402	5.0134	0.398811	12.5709	3.05317e-36	3.60791e-35	AAEL001878	lipase [Source:VB Community Annotation]			GO:0004806,GO:0005576,GO:0006629,GO:0052689	triglyceride lipase activity,extracellular region,lipid metabolic process,carboxylic ester hydrolase activity
LOC5576566	281.247	2.46887	0.196406	12.5702	3.07773e-36	3.6341e-35	AAEL026260				GO:0005515,GO:0007165	protein binding,signal transduction
LOC5566906	428.339	-2.22237	0.176803	-12.5697	3.09878e-36	3.65613e-35	AAEL025454				GO:0004252,GO:0006508,GO:0016020,GO:0016021	serine-type endopeptidase activity,proteolysis,membrane,integral component of membrane
LOC5573776	142.276	3.06772	0.24414	12.5654	3.27123e-36	3.85661e-35	AAEL000271	gamma-glutamyl hydrolase [Source:VB Community Annotation]			GO:0005576,GO:0005615,GO:0006508,GO:0008242,GO:0016787,GO:0034722	extracellular region,extracellular space,proteolysis,omega peptidase activity,hydrolase activity,gamma-glutamyl-peptidase activity
LOC5566255	1114.58	-2.21075	0.17596	-12.564	3.33252e-36	3.92583e-35	AAEL005286				GO:0046872	metal ion binding
LOC5565042	520.464	-1.51133	0.120307	-12.5622	3.40702e-36	4.0097e-35	AAEL022687				GO:0016020,GO:0016021,GO:0016740	membrane,integral component of membrane,transferase activity
LOC5568619	566.512	-1.55938	0.124133	-12.5622	3.40898e-36	4.0097e-35	AAEL006983				GO:0003676	nucleic acid binding
LOC5580184	3386.07	-1.79082	0.142632	-12.5555	3.70997e-36	4.36036e-35	AAEL002550	polyA-binding protein interacting protein, putative [Source:VB Community Annotation]			GO:0000900,GO:0045947	translation repressor activity, mRNA regulatory element binding,negative regulation of translational initiation
LOC5579205	153.5	4.11609	0.328165	12.5428	4.35602e-36	5.11572e-35	AAEL014045	allantoicase [Source:VB Community Annotation]			GO:0000256,GO:0004037,GO:0016787	allantoin catabolic process,allantoicase activity,hydrolase activity
LOC5578784	759.543	-1.76282	0.140554	-12.5419	4.40081e-36	5.16434e-35	AAEL021350	Histone H4 [Source:UniProtKB/TrEMBL;Acc:Q16IE4]			GO:0000786,GO:0003677,GO:0005634,GO:0005694,GO:0006352,GO:0042025,GO:0046982	nucleosome,DNA binding,nucleus,chromosome,DNA-templated transcription, initiation,host cell nucleus,protein heterodimerization activity
LOC5572063	2820.24	-1.73073	0.138003	-12.5413	4.43745e-36	5.20333e-35	AAEL019616				GO:0000166,GO:0004672,GO:0004712,GO:0005524,GO:0006468,GO:0016301,GO:0016310,GO:0016740	nucleotide binding,protein kinase activity,protein serine/threonine/tyrosine kinase activity,ATP binding,protein phosphorylation,kinase activity,phosphorylation,transferase activity
LOC5567616	3974.52	1.29375	0.103222	12.5337	4.88341e-36	5.72185e-35	AAEL006196	hemomucin [Source:VB Community Annotation]			GO:0009058,GO:0016020,GO:0016021,GO:0016844	biosynthetic process,membrane,integral component of membrane,strictosidine synthase activity
LOC23687516	122902	0.802696	0.0640479	12.5327	4.94291e-36	5.78712e-35	AAEL017096	Elongation factor 1-alpha [Source:UniProtKB/TrEMBL;Acc:Q1HR88]			GO:0000166,GO:0003746,GO:0003924,GO:0005525,GO:0005737,GO:0006412,GO:0006414	nucleotide binding,translation elongation factor activity,GTPase activity,GTP binding,cytoplasm,translation,translational elongation
LOC5563704	825.344	1.22806	0.0979899	12.5326	4.95347e-36	5.79502e-35	AAEL003909
LOC5570796	1140.95	-1.47308	0.117606	-12.5255	5.41304e-36	6.32781e-35	AAEL023508				GO:0016020,GO:0016021	membrane,integral component of membrane
LOC5572461	1524.33	-1.32711	0.105964	-12.5242	5.50552e-36	6.43099e-35	AAEL001808	organic anion transporter [Source:VB Community Annotation]			GO:0005515,GO:0016020,GO:0016021,GO:0055085	protein binding,membrane,integral component of membrane,transmembrane transport
LOC5575800	329.855	-2.0329	0.162331	-12.5231	5.57779e-36	6.51041e-35	AAEL012078	Gamma-glutamylcyclotransferase [Source:UniProtKB/TrEMBL;Acc:Q16N66]			GO:0003839,GO:0006751,GO:0016829,GO:0061928	gamma-glutamylcyclotransferase activity,glutathione catabolic process,lyase activity,glutathione specific gamma-glutamylcyclotransferase activity
LOC110677198	480.392	3.8649	0.308737	12.5184	5.92023e-36	6.90482e-35	AAEL023713				GO:0005515	protein binding
LOC5578696	1600.68	-1.37277	0.109692	-12.5147	6.20044e-36	7.2261e-35	AAEL025569
LOC110674174	347.22	-1.83436	0.146646	-12.5088	6.68291e-36	7.78242e-35	AAEL024982
LOC5572161	3841.81	1.81125	0.144833	12.5058	6.94379e-36	8.08004e-35	AAEL009574	elongase, putative [Source:VB Community Annotation]			GO:0006629,GO:0006631,GO:0006633,GO:0016020,GO:0016021,GO:0016740,GO:0102336,GO:0102337,GO:0102338,GO:0102756	lipid metabolic process,fatty acid metabolic process,fatty acid biosynthetic process,membrane,integral component of membrane,transferase activity,3-oxo-arachidoyl-CoA synthase activity,3-oxo-cerotoyl-CoA synthase activity,3-oxo-lignoceronyl-CoA synthase activity,very-long-chain 3-ketoacyl-CoA synthase activity
LOC5567811	173.262	3.75168	0.30008	12.5023	7.25497e-36	8.4357e-35	AAEL000993	dally [Source:VB Community Annotation]			GO:0005886,GO:0009966,GO:0016020,GO:0030513,GO:0031225,GO:0045880,GO:0046658,GO:0062023,GO:0090263	plasma membrane,regulation of signal transduction,membrane,positive regulation of BMP signaling pathway,anchored component of membrane,positive regulation of smoothened signaling pathway,anchored component of plasma membrane,collagen-containing extracellular matrix,positive regulation of canonical Wnt signaling pathway
LOC5571379	1102.64	-2.15122	0.172075	-12.5016	7.31449e-36	8.49842e-35	AAEL026486				GO:0000166,GO:0004016,GO:0005524,GO:0005886,GO:0006171,GO:0009190,GO:0016020,GO:0016021,GO:0016829,GO:0016849,GO:0035556,GO:0046872	nucleotide binding,adenylate cyclase activity,ATP binding,plasma membrane,cAMP biosynthetic process,cyclic nucleotide biosynthetic process,membrane,integral component of membrane,lyase activity,phosphorus-oxygen lyase activity,intracellular signal transduction,metal ion binding
LOC5570310	330.355	1.8231	0.145844	12.5003	7.43357e-36	8.63019e-35	AAEL008243
LOC110676735	761.409	-1.76054	0.140886	-12.4963	7.82503e-36	9.07775e-35	AAEL003673	Histone H4 [Source:UniProtKB/TrEMBL;Acc:Q16IE4]
LOC5567588	851.493	-1.53405	0.122874	-12.4847	9.04637e-36	1.04866e-34	AAEL006188				GO:0005856,GO:0005886,GO:0008360,GO:0016020,GO:0017048,GO:0035023	cytoskeleton,plasma membrane,regulation of cell shape,membrane,Rho GTPase binding,regulation of Rho protein signal transduction
LOC5576197	883.265	-1.82531	0.14625	-12.4808	9.50832e-36	1.10137e-34	AAEL012388				GO:0003676,GO:0005515	nucleic acid binding,protein binding
LOC5575275	2271.45	-1.1226	0.0899555	-12.4795	9.66196e-36	1.11832e-34	AAEL011737				GO:0005515	protein binding
LOC5571158	565.179	-1.56171	0.125161	-12.4777	9.88486e-36	1.14325e-34	AAEL008842				GO:0005634,GO:0005737,GO:0008140,GO:0032793,GO:0051289	nucleus,cytoplasm,cAMP response element binding protein binding,positive regulation of CREB transcription factor activity,protein homotetramerization
LOC5564815	839.465	-2.06994	0.16591	-12.4763	1.00576e-35	1.16234e-34	AAEL027444				GO:0005216,GO:0005220,GO:0005262,GO:0005783,GO:0005789,GO:0006811,GO:0006816,GO:0016020,GO:0016021,GO:0048016,GO:0055085,GO:0070588,GO:0070679	ion channel activity,inositol 1,4,5-trisphosphate-sensitive calcium-release channel activity,calcium channel activity,endoplasmic reticulum,endoplasmic reticulum membrane,ion transport,calcium ion transport,membrane,integral component of membrane,inositol phosphate-mediated signaling,transmembrane transport,calcium ion transmembrane transport,inositol 1,4,5 trisphosphate binding
LOC5568890	117.131	3.63666	0.291515	12.4751	1.02135e-35	1.17947e-34	AAEL007197	amino acid transporter [Source:VB Community Annotation]			GO:0016020,GO:0016021	membrane,integral component of membrane
LOC5563992	1180.61	-1.2063	0.0967257	-12.4713	1.07015e-35	1.23489e-34	AAEL014256	ATP-dependent RNA helicase [Source:VB Community Annotation]			GO:0000166,GO:0003676,GO:0004386,GO:0005524	nucleotide binding,nucleic acid binding,helicase activity,ATP binding
LOC5577340	382.58	-1.84688	0.148109	-12.4698	1.09144e-35	1.2585e-34	AAEL000411				GO:0003677,GO:0003697,GO:0006508,GO:0006974,GO:0008233,GO:0016787,GO:0018142	DNA binding,single-stranded DNA binding,proteolysis,cellular response to DNA damage stimulus,peptidase activity,hydrolase activity,protein-DNA covalent cross-linking
LOC5575526	685.857	-1.78819	0.143522	-12.4593	1.244e-35	1.43332e-34	AAEL011900	N-acetyllactosaminide beta-1,3-N-acetylglucosaminyltransferase, putative [Source:VB Community Annotation]			GO:0016020,GO:0016021,GO:0016740	membrane,integral component of membrane,transferase activity
LOC5569183	1156.9	1.28853	0.103431	12.4578	1.26747e-35	1.45926e-34	AAEL007439	myosin light chain 1, [Source:VB Community Annotation]			GO:0005509	calcium ion binding
LOC110679455	878.408	2.56224	0.205782	12.4513	1.37647e-35	1.58356e-34	AAEL023757				GO:0007411	axon guidance
LOC5578458	230.644	3.5143	0.28228	12.4497	1.40389e-35	1.61389e-34	AAEL000523	ring finger protein [Source:VB Community Annotation]			GO:0046872	metal ion binding
LOC110680464	300.011	-2.49794	0.200678	-12.4475	1.44303e-35	1.65665e-34	AAEL022585
LOC5574928	141.924	-2.74028	0.220147	-12.4475	1.44326e-35	1.65665e-34	AAEL011537
LOC5572712	245.204	-2.72729	0.219108	-12.4472	1.44773e-35	1.66053e-34	AAEL009990
LOC5565105	1154.36	-1.86524	0.149858	-12.4468	1.45628e-35	1.66907e-34	AAEL004592	tyrosine-protein kinase src64b [Source:VB Community Annotation]			GO:0000166,GO:0004672,GO:0004713,GO:0004715,GO:0005515,GO:0005524,GO:0006468,GO:0016301,GO:0016310,GO:0016740,GO:0018108	nucleotide binding,protein kinase activity,protein tyrosine kinase activity,non-membrane spanning protein tyrosine kinase activity,protein binding,ATP binding,protein phosphorylation,kinase activity,phosphorylation,transferase activity,peptidyl-tyrosine phosphorylation
LOC5578267	1129.55	1.1795	0.0947651	12.4466	1.45996e-35	1.67204e-34	AAEL003492	ribonuclease, putative [Source:VB Community Annotation]			GO:0004521,GO:0016020,GO:0016021,GO:0090305,GO:0090502	endoribonuclease activity,membrane,integral component of membrane,nucleic acid phosphodiester bond hydrolysis,RNA phosphodiester bond hydrolysis, endonucleolytic
LOC5568217	159.109	-2.41809	0.194311	-12.4444	1.49957e-35	1.71612e-34	AAEL025845				GO:0004672,GO:0005524,GO:0006468	protein kinase activity,ATP binding,protein phosphorylation
LOC5575285	461.136	3.21925	0.258762	12.441	1.56617e-35	1.79098e-34	AAEL011756	aldehyde dehydrogenase [Source:VB Community Annotation]			GO:0016491,GO:0016620,GO:0055114	oxidoreductase activity,oxidoreductase activity, acting on the aldehyde or oxo group of donors, NAD or NADP as acceptor,oxidation-reduction process
LOC110675781	964.025	-2.25894	0.181729	-12.4303	1.78961e-35	2.04496e-34	AAEL009968				GO:0000166,GO:0009166,GO:0016787,GO:0016788,GO:0046872	nucleotide binding,nucleotide catabolic process,hydrolase activity,hydrolase activity, acting on ester bonds,metal ion binding
LOC5566566	915.506	-1.46724	0.118075	-12.4263	1.88089e-35	2.14766e-34	AAEL005481	alpha-glucosidase [Source:VB Community Annotation]			GO:0004553,GO:0005975,GO:0008152,GO:0016020,GO:0016021,GO:0016787,GO:0016798	hydrolase activity, hydrolyzing O-glycosyl compounds,carbohydrate metabolic process,metabolic process,membrane,integral component of membrane,hydrolase activity,hydrolase activity, acting on glycosyl bonds
LOC5564171	630.512	-1.59916	0.128714	-12.4242	1.93269e-35	2.20515e-34	AAEL004128				GO:0005515	protein binding
LOC5574781	871.287	-1.59663	0.12853	-12.4223	1.97807e-35	2.25524e-34	AAEL011413				GO:0005515,GO:0016567,GO:0046872,GO:0061630	protein binding,protein ubiquitination,metal ion binding,ubiquitin protein ligase activity
LOC5575939	118.808	3.28549	0.264505	12.4213	2.00258e-35	2.28148e-34	AAEL012184	glutaminyl-peptide cyclotransferase [Source:VB Community Annotation]			GO:0016603,GO:0016740,GO:0016746	glutaminyl-peptide cyclotransferase activity,transferase activity,transferase activity, transferring acyl groups
LOC5569015	1794.46	2.61873	0.210852	12.4198	2.04127e-35	2.32382e-34	AAEL007293	cAMP-dependent protein kinase catalytic subunit [Source:VB Community Annotation]			GO:0000166,GO:0004672,GO:0004674,GO:0004679,GO:0004691,GO:0005524,GO:0006468,GO:0007186,GO:0016301,GO:0016310,GO:0016740,GO:0034237	nucleotide binding,protein kinase activity,protein serine/threonine kinase activity,AMP-activated protein kinase activity,cAMP-dependent protein kinase activity,ATP binding,protein phosphorylation,G protein-coupled receptor signaling pathway,kinase activity,phosphorylation,transferase activity,protein kinase A regulatory subunit binding
LOC5573800	1275.68	1.6656	0.134141	12.4168	2.11946e-35	2.41102e-34	AAEL019579				GO:0004252,GO:0006508,GO:0008233,GO:0008236,GO:0016020,GO:0016021,GO:0016787	serine-type endopeptidase activity,proteolysis,peptidase activity,serine-type peptidase activity,membrane,integral component of membrane,hydrolase activity
LOC5566159	256.148	3.29851	0.265726	12.4132	2.21623e-35	2.51923e-34	AAEL005229	ptpla domain protein [Source:VB Community Annotation]			GO:0005783,GO:0005789,GO:0006629,GO:0006631,GO:0006633,GO:0016020,GO:0016021,GO:0016829,GO:0102158,GO:0102343,GO:0102344,GO:0102345	endoplasmic reticulum,endoplasmic reticulum membrane,lipid metabolic process,fatty acid metabolic process,fatty acid biosynthetic process,membrane,integral component of membrane,lyase activity,very-long-chain 3-hydroxyacyl-CoA dehydratase activity,3-hydroxy-arachidoyl-CoA dehydratase activity,3-hydroxy-behenoyl-CoA dehydratase activity,3-hydroxy-lignoceroyl-CoA dehydratase activity
LOC110680199	604.371	-1.87548	0.151113	-12.4111	2.27563e-35	2.58481e-34	AAEL024807
LOC5571302	2185.16	0.987803	0.0796381	12.4036	2.49723e-35	2.83441e-34	AAEL008956
LOC5576834	9145.91	-0.932001	0.0751439	-12.4029	2.5205e-35	2.85869e-34	AAEL022462				GO:0003677,GO:0003700,GO:0005634,GO:0005667,GO:0006355,GO:0046983	DNA binding,DNA-binding transcription factor activity,nucleus,transcription regulator complex,regulation of transcription, DNA-templated,protein dimerization activity
LOC5577246	1221.55	1.20405	0.0971454	12.3943	2.80681e-35	3.18106e-34	AAEL006071				GO:0004721,GO:0004725,GO:0005515,GO:0006470,GO:0008641,GO:0016311,GO:0016787,GO:0016791,GO:0035335	phosphoprotein phosphatase activity,protein tyrosine phosphatase activity,protein binding,protein dephosphorylation,ubiquitin-like modifier activating enzyme activity,dephosphorylation,hydrolase activity,phosphatase activity,peptidyl-tyrosine dephosphorylation
LOC5575085	121.411	3.36505	0.271539	12.3925	2.8692e-35	3.24934e-34	AAEL011641	transferrin [Source:VB Community Annotation]			GO:0005615,GO:0016020,GO:0016021	extracellular space,membrane,integral component of membrane
LOC5571172	2809.34	-0.911727	0.0735872	-12.3897	2.96994e-35	3.36093e-34	AAEL008862				GO:0003824,GO:0006508,GO:0046872	catalytic activity,proteolysis,metal ion binding
LOC5573217	9824.58	1.04592	0.084434	12.3875	3.05562e-35	3.45532e-34	AAEL010299	40S ribosomal protein S12 [Source:UniProtKB/TrEMBL;Acc:Q1HRM3]	RpS12		GO:0003735,GO:0005840,GO:0006412	structural constituent of ribosome,ribosome,translation
LOC5569581	1313.64	-1.06935	0.0863428	-12.3849	3.15396e-35	3.56388e-34	AAEL007763	vacuole membrane protein [Source:VB Community Annotation]			GO:0016020,GO:0016021	membrane,integral component of membrane
LOC5577709	105.086	3.68313	0.297518	12.3795	3.37384e-35	3.80951e-34	AAEL013349	lethal(2)essential for life protein, l2efl [Source:VB Community Annotation]			GO:0046872	metal ion binding
LOC5579661	279.888	-1.82796	0.147679	-12.378	3.43985e-35	3.88117e-34	AAEL003961	short-chain dehydrogenase [Source:VB Community Annotation]			GO:0016020,GO:0016021,GO:0016491,GO:0055114	membrane,integral component of membrane,oxidoreductase activity,oxidation-reduction process
LOC5569652	5120.48	-1.15435	0.0932758	-12.3757	3.53913e-35	3.99023e-34	AAEL022067
LOC5565022	359.375	-1.61661	0.130674	-12.3714	3.73323e-35	4.20432e-34	AAEL014705				GO:0005515,GO:0016020,GO:0016021	protein binding,membrane,integral component of membrane
LOC5565466	832.135	-1.53279	0.123898	-12.3714	3.73454e-35	4.20432e-34	AAEL004790	ubiquitin-protein ligase [Source:VB Community Annotation]			GO:0004842,GO:0005515,GO:0016567	ubiquitin-protein transferase activity,protein binding,protein ubiquitination
LOC5565224	4127	0.887451	0.0717407	12.3703	3.78604e-35	4.25915e-34	AAEL004668	Septin [Source:UniProtKB/TrEMBL;Acc:A0A1S4F8E6]			GO:0000166,GO:0005525	nucleotide binding,GTP binding
LOC5568230	246.974	-1.89512	0.153205	-12.3698	3.80729e-35	4.2799e-34	AAEL006676				GO:0016020,GO:0016021	membrane,integral component of membrane
LOC5577235	109.864	3.72257	0.300995	12.3675	3.91719e-35	4.4002e-34	AAEL003150	alpha-n-acetylglucosaminidase [Source:VB Community Annotation]			GO:0016787	hydrolase activity
LOC5571208	976.151	-1.31263	0.106172	-12.3633	4.12916e-35	4.63488e-34	AAEL008893	xaa-pro dipeptidase pepd/pepq(e.coli) [Source:VB Community Annotation]			GO:0004177,GO:0006508,GO:0016787,GO:0030145,GO:0046872,GO:0070006	aminopeptidase activity,proteolysis,hydrolase activity,manganese ion binding,metal ion binding,metalloaminopeptidase activity
LOC5563667	709.184	-1.40699	0.113868	-12.3564	4.50122e-35	5.04879e-34	AAEL000550	werner helicase interacting protein [Source:VB Community Annotation]			GO:0000166,GO:0003677,GO:0006260,GO:0006281,GO:0006310,GO:0009378,GO:0032508	nucleotide binding,DNA binding,DNA replication,DNA repair,DNA recombination,four-way junction helicase activity,DNA duplex unwinding
LOC110676764	122.22	4.58233	0.370868	12.3557	4.53808e-35	5.08639e-34	AAEL028011
LOC5570811	2618.25	-1.77115	0.143461	-12.3458	5.13081e-35	5.74651e-34	AAEL008579	Zinc finger protein [Source:UniProtKB/TrEMBL;Acc:A0A1S4FJV9]			GO:0003676,GO:0004386,GO:0005515,GO:0046872	nucleic acid binding,helicase activity,protein binding,metal ion binding
LOC5578768	2701.8	-2.09487	0.169686	-12.3455	5.14891e-35	5.76254e-34	AAEL020484
LOC5570107	139.718	-2.65595	0.215216	-12.3409	5.45574e-35	6.10146e-34	AAEL008098	PIWI [Source:VB Community Annotation]	PIWI2		GO:0003676,GO:0005515,GO:0031047	nucleic acid binding,protein binding,gene silencing by RNA
LOC5567271	143.548	-2.75592	0.223356	-12.3387	5.60667e-35	6.26564e-34	AAEL005923				GO:0003676	nucleic acid binding
LOC5569899	1244.5	-1.14243	0.0926253	-12.3339	5.94788e-35	6.6421e-34	AAEL007990
LOC5570375	115.678	3.37905	0.274508	12.3095	8.05485e-35	8.98838e-34	AAEL021941
LOC5568097	1770.94	-1.40712	0.114315	-12.3091	8.08934e-35	9.02026e-34	AAEL023759				GO:0016301,GO:0016310	kinase activity,phosphorylation
LOC5576986	489.325	-1.67953	0.136453	-12.3085	8.15122e-35	9.08262e-34	AAEL003055				GO:0005739,GO:0016020,GO:0016021,GO:0043022	mitochondrion,membrane,integral component of membrane,ribosome binding
LOC5571621	376.481	9.061	0.73621	12.3076	8.24139e-35	9.17638e-34	AAEL009199	core 1 UDP-galactose:n-acetylgalactosamine-alpha-r beta 1,3- galactosyltransferase [Source:VB Community Annotation]			GO:0006486,GO:0016020,GO:0016021,GO:0016263,GO:0016266,GO:0016757	protein glycosylation,membrane,integral component of membrane,glycoprotein-N-acetylgalactosamine 3-beta-galactosyltransferase activity,O-glycan processing,transferase activity, transferring glycosyl groups
LOC5578034	246.276	-2.78005	0.225887	-12.3072	8.28035e-35	9.21302e-34	AAEL013473	cAMP-specific 3,5-cyclic phosphodiesterase [Source:VB Community Annotation]			GO:0004114,GO:0007165,GO:0008081,GO:0016787,GO:0046872	3',5'-cyclic-nucleotide phosphodiesterase activity,signal transduction,phosphoric diester hydrolase activity,hydrolase activity,metal ion binding
LOC5574463	1298.53	2.51208	0.204151	12.305	8.51381e-35	9.46586e-34	AAEL011178	posterior sex combs protein [Source:VB Community Annotation]			GO:0005634,GO:0046872	nucleus,metal ion binding
LOC5564491	263.044	1.90444	0.154808	12.3019	8.84376e-35	9.82554e-34	AAEL004276				GO:0005737	cytoplasm
LOC110679441	1116.45	-1.45852	0.118669	-12.2906	1.01726e-34	1.12937e-33	AAEL020344				GO:0003743,GO:0005634,GO:0006355,GO:0006413	translation initiation factor activity,nucleus,regulation of transcription, DNA-templated,translational initiation
LOC5569338	2286.5	1.00266	0.0815803	12.2905	1.01841e-34	1.12982e-33	AAEL007546	actin-related protein 2/3 complex subunit 1A [Source:VB Community Annotation]			GO:0003779,GO:0005515,GO:0005737,GO:0005856,GO:0005885,GO:0015629,GO:0030833,GO:0034314	actin binding,protein binding,cytoplasm,cytoskeleton,Arp2/3 protein complex,actin cytoskeleton,regulation of actin filament polymerization,Arp2/3 complex-mediated actin nucleation
LOC5571831	118.316	3.70832	0.30176	12.289	1.03796e-34	1.15067e-33	AAEL025165				GO:0000981,GO:0003677,GO:0003700,GO:0005634,GO:0006355,GO:0006357,GO:0006366,GO:0007275,GO:0043565	DNA-binding transcription factor activity, RNA polymerase II-specific,DNA binding,DNA-binding transcription factor activity,nucleus,regulation of transcription, DNA-templated,regulation of transcription by RNA polymerase II,transcription by RNA polymerase II,multicellular organism development,sequence-specific DNA binding
LOC5578190	643.755	1.43733	0.117008	12.2841	1.10309e-34	1.22198e-33	AAEL019450				GO:0004252,GO:0006508,GO:0008233,GO:0008236,GO:0016020,GO:0016021,GO:0016787	serine-type endopeptidase activity,proteolysis,peptidase activity,serine-type peptidase activity,membrane,integral component of membrane,hydrolase activity
LOC5563717	7600.62	1.74653	0.142198	12.2823	1.12686e-34	1.24741e-33	AAEL003903	acid phosphatase-1 [Source:VB Community Annotation]			GO:0003993,GO:0016020,GO:0016021,GO:0016311	acid phosphatase activity,membrane,integral component of membrane,dephosphorylation
LOC5566327	455.732	1.84053	0.150043	12.2667	1.36688e-34	1.51201e-33	AAEL005313
LOC5568593	487.234	3.78467	0.30862	12.2632	1.42768e-34	1.57812e-33	AAEL001104				GO:0003779,GO:0005515	actin binding,protein binding
LOC5568413	724.903	-2.70078	0.22027	-12.2613	1.46219e-34	1.61509e-33	AAEL006827	cytochrome P450 [Source:VB Community Annotation]	CYP12F8		GO:0004497,GO:0005506,GO:0016491,GO:0016705,GO:0020037,GO:0046872,GO:0055114	monooxygenase activity,iron ion binding,oxidoreductase activity,oxidoreductase activity, acting on paired donors, with incorporation or reduction of molecular oxygen,heme binding,metal ion binding,oxidation-reduction process
LOC5577563	1142.44	-1.81272	0.147851	-12.2605	1.4765e-34	1.62972e-33	AAEL019605				GO:0000139,GO:0005794,GO:0006486,GO:0016020,GO:0016021,GO:0016740,GO:0016757,GO:0030246	Golgi membrane,Golgi apparatus,protein glycosylation,membrane,integral component of membrane,transferase activity,transferase activity, transferring glycosyl groups,carbohydrate binding
LOC5566250	1061.91	5.9486	0.485397	12.2551	1.57699e-34	1.73937e-33	AAEL015109	Clip-Domain Serine Protease family D. [Source:VB Community Annotation]	CLIPD10		GO:0004252,GO:0006508	serine-type endopeptidase activity,proteolysis
LOC5571268	245.736	3.22696	0.263409	12.2508	1.66434e-34	1.83439e-33	AAEL001584				GO:0005509,GO:0016020,GO:0016021	calcium ion binding,membrane,integral component of membrane
LOC5564187	292.59	-1.98365	0.161934	-12.2497	1.68545e-34	1.85631e-33	AAEL021919
LOC5567216	3707.69	2.00395	0.163695	12.242	1.85402e-34	2.04049e-33	AAEL000893	sex-determining region y protein, sry [Source:VB Community Annotation]			GO:0003677,GO:0005634	DNA binding,nucleus
LOC5572577	113.903	3.23019	0.263963	12.2373	1.96518e-34	2.16127e-33	AAEL009915	centrosomal protein [Source:VB Community Annotation]
LOC5571274	516.997	3.09633	0.253072	12.235	2.02198e-34	2.22214e-33	AAEL001570				GO:0016020,GO:0016021	membrane,integral component of membrane
LOC5572987	1809.77	1.99516	0.163242	12.2221	2.36884e-34	2.60146e-33	AAEL001918
LOC5574813	797.406	1.76029	0.144105	12.2153	2.57401e-34	2.82473e-33	AAEL002474				GO:0003676,GO:0005515	nucleic acid binding,protein binding
LOC5578118	475.364	-1.48845	0.121925	-12.2079	2.82197e-34	3.09462e-33	AAEL003438
LOC5569694	2212.6	-1.5029	0.123147	-12.2041	2.95516e-34	3.23834e-33	AAEL018031				GO:0003676	nucleic acid binding
LOC5579172	7662.61	2.14889	0.176125	12.2009	3.07349e-34	3.3656e-33	AAEL003888	ubiquitin [Source:VB Community Annotation]			GO:0005515	protein binding
LOC5574172	405.742	-1.65647	0.135795	-12.1983	3.17298e-34	3.47204e-33	AAEL002285	zinc finger protein [Source:VB Community Annotation]			GO:0003676,GO:0005634,GO:0008270	nucleic acid binding,nucleus,zinc ion binding
LOC5563615	2609.47	-2.16031	0.177117	-12.1971	3.22067e-34	3.5217e-33	AAEL000079
LOC5566625	1403.65	-2.70777	0.222047	-12.1946	3.32137e-34	3.6292e-33	AAEL000769	arginine/serine-rich splicing factor [Source:VB Community Annotation]			GO:0003676,GO:0003723	nucleic acid binding,RNA binding
LOC5567126	1067.42	-1.35459	0.111218	-12.1796	3.99241e-34	4.35931e-33	AAEL005879	vinculin [Source:VB Community Annotation]			GO:0003779,GO:0005198,GO:0005737,GO:0005886,GO:0005912,GO:0007155,GO:0015629,GO:0016020,GO:0030054,GO:0051015	actin binding,structural molecule activity,cytoplasm,plasma membrane,adherens junction,cell adhesion,actin cytoskeleton,membrane,cell junction,actin filament binding
LOC5572647	173.574	2.87486	0.236055	12.1787	4.03464e-34	4.40227e-33	AAEL001851
LOC5576380	2689.83	1.28914	0.106	12.1617	4.97088e-34	5.41993e-33	AAEL012471	JAKSTAT pathway signalling Transmembrane Receptor Domeless. [Source:VB Community Annotation]	DOME		GO:0004896,GO:0005515,GO:0016020,GO:0016021,GO:0019221	cytokine receptor activity,protein binding,membrane,integral component of membrane,cytokine-mediated signaling pathway
LOC5569813	191.954	2.92861	0.240912	12.1563	5.30875e-34	5.78419e-33	AAEL001305
LOC5564357	561.459	-1.54594	0.127175	-12.156	5.32739e-34	5.80034e-33	AAEL004211				GO:0005515,GO:0005739,GO:0006869,GO:0008289,GO:0016020,GO:0016021,GO:0035556,GO:0044233,GO:0046872,GO:0051560,GO:1990456	protein binding,mitochondrion,lipid transport,lipid binding,membrane,integral component of membrane,intracellular signal transduction,mitochondria-associated endoplasmic reticulum membrane,metal ion binding,mitochondrial calcium ion homeostasis,mitochondrion-endoplasmic reticulum membrane tethering
LOC5578192	142.072	2.98963	0.245996	12.1532	5.51952e-34	6.00524e-33	AAEL003464				GO:0016020,GO:0016021	membrane,integral component of membrane
LOC5576991	156.553	-2.51709	0.207171	-12.1498	5.75078e-34	6.25239e-33	AAEL018290				GO:0000166,GO:0004672,GO:0005524,GO:0006468	nucleotide binding,protein kinase activity,ATP binding,protein phosphorylation
LOC5564717	445.232	3.33354	0.274427	12.1473	5.93084e-34	6.44355e-33	AAEL014589	reticulocalbin [Source:VB Community Annotation]			GO:0005509	calcium ion binding
LOC5576133	503.924	2.52579	0.207946	12.1464	5.99493e-34	6.50854e-33	AAEL002812
LOC5576673	1175.62	2.91285	0.239898	12.142	6.32635e-34	6.86345e-33	AAEL026023
LOC5564255	1125.82	2.07786	0.171174	12.1389	6.57421e-34	7.12729e-33	AAEL004193	rhophilin [Source:VB Community Annotation]			GO:0005515,GO:0007165	protein binding,signal transduction
LOC5569889	501.922	-1.74958	0.144142	-12.1379	6.65378e-34	7.20842e-33	AAEL027567				GO:0005737,GO:0005829,GO:0005886,GO:0016020	cytoplasm,cytosol,plasma membrane,membrane
LOC110674013	198.648	-2.42147	0.199515	-12.1368	6.73951e-34	7.29611e-33	AAEL021035				GO:0005789,GO:0016020,GO:0030314	endoplasmic reticulum membrane,membrane,junctional membrane complex
LOC5574637	1156.13	1.02924	0.0848268	12.1335	7.02115e-34	7.5956e-33	AAEL011271	programmed cell death 6-interacting protein [Source:VB Community Annotation]			GO:0005515	protein binding
LOC5565118	1908.96	3.07535	0.253502	12.1314	7.19701e-34	7.78033e-33	AAEL014734				GO:0003824,GO:0008152,GO:0016491,GO:0033512,GO:0047130,GO:0047131,GO:0055114	catalytic activity,metabolic process,oxidoreductase activity,L-lysine catabolic process to acetyl-CoA via saccharopine,saccharopine dehydrogenase (NADP+, L-lysine-forming) activity,saccharopine dehydrogenase (NAD+, L-glutamate-forming) activity,oxidation-reduction process
LOC5576416	779.646	3.34151	0.275573	12.1256	7.72468e-34	8.34484e-33	AAEL012509	Carboxylic ester hydrolase [Source:UniProtKB/TrEMBL;Acc:A0A1S4FWG0]			GO:0016787,GO:0052689	hydrolase activity,carboxylic ester hydrolase activity
LOC5567219	286.284	-1.70233	0.140413	-12.1238	7.90402e-34	8.53253e-33	AAEL000904	Carboxylic ester hydrolase [Source:UniProtKB/TrEMBL;Acc:A0A1S4EX74]			GO:0016787,GO:0052689	hydrolase activity,carboxylic ester hydrolase activity
LOC5573995	3449.66	-1.58808	0.131013	-12.1215	8.12622e-34	8.76619e-33	AAEL015118				GO:0003676,GO:0003723	nucleic acid binding,RNA binding
LOC5563687	2010.09	-1.21485	0.100261	-12.1168	8.60032e-34	9.27106e-33	AAEL020625				GO:0005515,GO:0016020,GO:0016021	protein binding,membrane,integral component of membrane
LOC5578786	2646.77	-1.29151	0.106592	-12.1164	8.65077e-34	9.31885e-33	AAEL026395	Histone H3 [Source:UniProtKB/TrEMBL;Acc:Q16N56]
LOC5579210	448.115	1.86318	0.153806	12.1139	8.92004e-34	9.60213e-33	AAEL027204				GO:0005509,GO:0005634,GO:0005737,GO:0005886,GO:0007275,GO:0008270,GO:0014018,GO:0016020,GO:0016055,GO:0030178,GO:0046872	calcium ion binding,nucleus,cytoplasm,plasma membrane,multicellular organism development,zinc ion binding,neuroblast fate specification,membrane,Wnt signaling pathway,negative regulation of Wnt signaling pathway,metal ion binding
LOC110678350	113.831	4.55145	0.376029	12.104	1.00596e-33	1.08212e-32	AAEL022711
LOC5570598	1516.03	-2.31352	0.191184	-12.101	1.04349e-33	1.1217e-32	AAEL023839				GO:0005515	protein binding
LOC23687562	216.79	-3.38932	0.28011	-12.1	1.05674e-33	1.13514e-32	AAEL017142				GO:0042302	structural constituent of cuticle
LOC5568821	468.982	-1.37585	0.113759	-12.0944	1.13094e-33	1.21399e-32	AAEL001191				GO:0016020,GO:0016021,GO:0016787	membrane,integral component of membrane,hydrolase activity
LOC5569621	873.611	1.27546	0.105488	12.091	1.17848e-33	1.26412e-32	AAEL001255
LOC5570233	1856.51	-1.22705	0.101507	-12.0884	1.2163e-33	1.30378e-32	AAEL008166	malate dehydrogenase [Source:VB Community Annotation]			GO:0003824,GO:0005975,GO:0006099,GO:0016491,GO:0016616,GO:0019752,GO:0030060,GO:0055114	catalytic activity,carbohydrate metabolic process,tricarboxylic acid cycle,oxidoreductase activity,oxidoreductase activity, acting on the CH-OH group of donors, NAD or NADP as acceptor,carboxylic acid metabolic process,L-malate dehydrogenase activity,oxidation-reduction process
LOC5578837	3202.78	-1.56139	0.129169	-12.088	1.22241e-33	1.30941e-32	AAEL013877	Glucosamine-6-phosphate isomerase (EC 3.5.99.6)(Glucosamine-6-phosphate deaminase)(GlcN6P deaminase)(GNPDA) [Source:VB Community Annotation]			GO:0004342,GO:0005737,GO:0005975,GO:0006043,GO:0006044,GO:0006091,GO:0016787	glucosamine-6-phosphate deaminase activity,cytoplasm,carbohydrate metabolic process,glucosamine catabolic process,N-acetylglucosamine metabolic process,generation of precursor metabolites and energy,hydrolase activity
LOC5567467	360.198	-1.77221	0.146623	-12.0868	1.2397e-33	1.32699e-32	AAEL000967	tmc7 protein [Source:VB Community Annotation]			GO:0005887,GO:0016020,GO:0016021	integral component of plasma membrane,membrane,integral component of membrane
LOC5567847	1886.01	-1.39779	0.11566	-12.0853	1.26287e-33	1.35084e-32	AAEL000994
LOC5572572	3352.6	-1.33593	0.110571	-12.0822	1.3124e-33	1.40284e-32	AAEL018187				GO:0003677,GO:0003700,GO:0005634,GO:0006355,GO:0007275,GO:0043565	DNA binding,DNA-binding transcription factor activity,nucleus,regulation of transcription, DNA-templated,multicellular organism development,sequence-specific DNA binding
LOC110681189	253.95	-2.05744	0.170319	-12.0799	1.34882e-33	1.44076e-32	AAEL021624
LOC5564562	1267.23	-1.86302	0.154255	-12.0775	1.38855e-33	1.48216e-32	AAEL004305
LOC110674761	139.012	2.7388	0.226934	12.0687	1.54547e-33	1.6485e-32	AAEL024258
LOC5577403	199.922	-1.98966	0.164865	-12.0684	1.55196e-33	1.65427e-32	AAEL003165	low molecular weight protein-tyrosine-phosphatase [Source:VB Community Annotation]			GO:0003993,GO:0004725,GO:0004726,GO:0005737,GO:0006470,GO:0016787,GO:0035335	acid phosphatase activity,protein tyrosine phosphatase activity,non-membrane spanning protein tyrosine phosphatase activity,cytoplasm,protein dephosphorylation,hydrolase activity,peptidyl-tyrosine dephosphorylation
LOC5567991	1387.07	-1.2682	0.105087	-12.0681	1.55703e-33	1.65851e-32	AAEL006433				GO:0006811,GO:0008381,GO:0016020,GO:0016021,GO:0034220	ion transport,mechanosensitive ion channel activity,membrane,integral component of membrane,ion transmembrane transport
LOC5578794	8164.44	0.88148	0.0730436	12.0679	1.56149e-33	1.6621e-32	AAEL003664	lupus la ribonucleoprotein [Source:VB Community Annotation]			GO:0003676,GO:0003723,GO:0005634,GO:0006396,GO:1990904	nucleic acid binding,RNA binding,nucleus,RNA processing,ribonucleoprotein complex
LOC5580274	107.452	-4.03758	0.334821	-12.0589	1.74063e-33	1.85149e-32	AAEL002994				GO:0016020,GO:0016021	membrane,integral component of membrane
LOC5572571	5945.31	-1.01948	0.0845737	-12.0544	1.83891e-33	1.95466e-32	AAEL019534				GO:0003677,GO:0005634,GO:0006260	DNA binding,nucleus,DNA replication
LOC110674276	122.329	3.07695	0.255287	12.0529	1.87278e-33	1.98927e-32	AAEL021959
LOC5566446	1676.8	-1.08825	0.0902938	-12.0523	1.88596e-33	2.00188e-32	AAEL005390	importin [Source:VB Community Annotation]			GO:0005634,GO:0006886,GO:0008536	nucleus,intracellular protein transport,Ran GTPase binding
LOC5566223	375.5	2.13174	0.176886	12.0515	1.9049e-33	2.02057e-32	AAEL029010				GO:0016021	integral component of membrane
LOC5578055	89.8418	-5.15902	0.4281	-12.051	1.91685e-33	2.03184e-32	AAEL013483	short-chain dehydrogenase [Source:VB Community Annotation]			GO:0016020,GO:0016021,GO:0055114	membrane,integral component of membrane,oxidation-reduction process
LOC5579004	3216.04	-1.41157	0.11716	-12.0483	1.98062e-33	2.09797e-32	AAEL003812
LOC5577896	90.1788	4.22876	0.350996	12.0479	1.98989e-33	2.10632e-32	AAEL019427
LOC110676139	174.906	3.12157	0.259246	12.041	2.16385e-33	2.28888e-32	AAEL026446
LOC5566455	3239.51	1.03542	0.0860055	12.0391	2.21472e-33	2.34106e-32	AAEL026474				GO:0000166,GO:0004672,GO:0004674,GO:0005524,GO:0006468,GO:0016301,GO:0016310,GO:0016740,GO:0035556	nucleotide binding,protein kinase activity,protein serine/threonine kinase activity,ATP binding,protein phosphorylation,kinase activity,phosphorylation,transferase activity,intracellular signal transduction
LOC5568669	5913.22	0.881308	0.0732274	12.0352	2.32009e-33	2.45074e-32	AAEL007007	DNA replication licensing factor MCM2 [Source:VB Community Annotation]			GO:0000166,GO:0003677,GO:0003678,GO:0004386,GO:0005524,GO:0005634,GO:0006260,GO:0006270,GO:0016787,GO:0032508,GO:0042555,GO:1905775	nucleotide binding,DNA binding,DNA helicase activity,helicase activity,ATP binding,nucleus,DNA replication,DNA replication initiation,hydrolase activity,DNA duplex unwinding,MCM complex,negative regulation of DNA helicase activity
LOC5569487	1069.81	-1.59182	0.132294	-12.0324	2.39958e-33	2.53294e-32	AAEL027189
LOC5569762	194.215	2.80934	0.233527	12.0301	2.46923e-33	2.60466e-32	AAEL025391				GO:0005515,GO:0005634,GO:0016020,GO:0016021	protein binding,nucleus,membrane,integral component of membrane
LOC5572552	1787.87	-1.05616	0.0877972	-12.0295	2.48641e-33	2.62097e-32	AAEL009883	26S protease (S4) regulatory subunit, putative [Source:UniProtKB/TrEMBL;Acc:Q16UJ3]			GO:0000166,GO:0005524,GO:0005739,GO:0007005,GO:0016887	nucleotide binding,ATP binding,mitochondrion,mitochondrion organization,ATPase activity
LOC5578485	1234.84	-1.27117	0.105685	-12.0279	2.53499e-33	2.67033e-32	AAEL027054				GO:0005634,GO:0007275	nucleus,multicellular organism development
LOC5567672	157.952	2.75528	0.229104	12.0263	2.58382e-33	2.71988e-32	AAEL019564				GO:0004252,GO:0006508	serine-type endopeptidase activity,proteolysis
LOC110676279	189.846	3.67534	0.305794	12.019	2.82314e-33	2.96976e-32	AAEL021140				GO:0003676,GO:0003964,GO:0006278,GO:0008270	nucleic acid binding,RNA-directed DNA polymerase activity,RNA-dependent DNA biosynthetic process,zinc ion binding
LOC5577372	111.567	3.21082	0.267152	12.0187	2.83381e-33	2.97893e-32	AAEL000419				GO:0042302	structural constituent of cuticle
LOC5570014	1583.12	-1.08875	0.0905919	-12.0182	2.8507e-33	2.99462e-32	AAEL000179	ubiquitin-conjugating enzyme E2 l [Source:VB Community Annotation]			GO:0000166,GO:0005524,GO:0016740	nucleotide binding,ATP binding,transferase activity
LOC5565894	2285.4	1.01892	0.0847883	12.0172	2.88487e-33	3.02841e-32	AAEL020638				GO:0000166,GO:0004674,GO:0005515,GO:0005524,GO:0006468,GO:0016301,GO:0016310,GO:0016740,GO:0044877	nucleotide binding,protein serine/threonine kinase activity,protein binding,ATP binding,protein phosphorylation,kinase activity,phosphorylation,transferase activity,protein-containing complex binding
LOC5568574	832.446	1.44869	0.120568	12.0155	2.94462e-33	3.08744e-32	AAEL026410				GO:0000139,GO:0005794,GO:0006486,GO:0016020,GO:0016021,GO:0016740,GO:0016757,GO:0030246	Golgi membrane,Golgi apparatus,protein glycosylation,membrane,integral component of membrane,transferase activity,transferase activity, transferring glycosyl groups,carbohydrate binding
LOC5564361	642.218	-2.11812	0.176282	-12.0155	2.94514e-33	3.08744e-32	AAEL020132				GO:0008654,GO:0016020,GO:0016740,GO:0016780	phospholipid biosynthetic process,membrane,transferase activity,phosphotransferase activity, for other substituted phosphate groups
LOC5570984	243.503	2.72251	0.226635	12.0128	3.04485e-33	3.18976e-32	AAEL020513
LOC5566341	324.207	-1.96727	0.163908	-12.0022	3.45884e-33	3.62097e-32	AAEL005329
LOC5568588	279.156	2.6604	0.221695	12.0003	3.54177e-33	3.70524e-32	AAEL001100	phosphoserine phosphatase [Source:VB Community Annotation]			GO:0004647,GO:0006564,GO:0016311	phosphoserine phosphatase activity,L-serine biosynthetic process,dephosphorylation
LOC5569117	875.169	-1.3291	0.110759	-12	3.55309e-33	3.71453e-32	AAEL007370				GO:0004146,GO:0006545,GO:0006730,GO:0016491,GO:0046654,GO:0050661,GO:0055114	dihydrofolate reductase activity,glycine biosynthetic process,one-carbon metabolic process,oxidoreductase activity,tetrahydrofolate biosynthetic process,NADP binding,oxidation-reduction process
LOC5563590	25556.9	0.902583	0.0752595	11.993	3.86868e-33	4.04168e-32	AAEL000032	40S ribosomal protein S6 [Source:UniProtKB/Swiss-Prot;Acc:Q9U761]	RpS6		GO:0003735,GO:0005840,GO:0006412	structural constituent of ribosome,ribosome,translation
LOC110676083	175.674	-2.29555	0.191467	-11.9893	4.04473e-33	4.22271e-32	AAEL020680
LOC5569186	1461.36	-2.11285	0.176246	-11.9881	4.10115e-33	4.27868e-32	AAEL007447				GO:0003676,GO:0005515,GO:0035278	nucleic acid binding,protein binding,miRNA mediated inhibition of translation
LOC5565278	1056.11	-1.8237	0.152144	-11.9867	4.1741e-33	4.35181e-32	AAEL023512
LOC5574747	17636.4	1.31051	0.109338	11.9858	4.21746e-33	4.39401e-32	AAEL019990				GO:0003677,GO:0005634,GO:0005694	DNA binding,nucleus,chromosome
LOC5574850	108.846	3.46822	0.289544	11.9782	4.62122e-33	4.81138e-32	AAEL011463	cytochrome P450 [Source:VB Community Annotation]			GO:0004497,GO:0005506,GO:0016491,GO:0016705,GO:0020037,GO:0046872,GO:0055114	monooxygenase activity,iron ion binding,oxidoreductase activity,oxidoreductase activity, acting on paired donors, with incorporation or reduction of molecular oxygen,heme binding,metal ion binding,oxidation-reduction process
LOC110674873	387.777	-1.81913	0.151875	-11.9778	4.64706e-33	4.83448e-32	AAEL023750
LOC5569163	182.33	3.50377	0.292524	11.9777	4.64976e-33	4.83448e-32	AAEL026357				GO:0005506,GO:0016491,GO:0016702,GO:0017172,GO:0042412,GO:0046872,GO:0051213,GO:0055114	iron ion binding,oxidoreductase activity,oxidoreductase activity, acting on single donors with incorporation of molecular oxygen, incorporation of two atoms of oxygen,cysteine dioxygenase activity,taurine biosynthetic process,metal ion binding,dioxygenase activity,oxidation-reduction process
LOC5579111	11625.9	1.03762	0.0866325	11.9773	4.67278e-33	4.8551e-32	AAEL023486	Eukaryotic translation initiation factor 5A (Fragment) [Source:UniProtKB/TrEMBL;Acc:Q1HRN6]			GO:0003723,GO:0003743,GO:0003746,GO:0006412,GO:0006413,GO:0006414,GO:0006452,GO:0043022,GO:0045901,GO:0045905	RNA binding,translation initiation factor activity,translation elongation factor activity,translation,translational initiation,translational elongation,translational frameshifting,ribosome binding,positive regulation of translational elongation,positive regulation of translational termination
LOC5564921	45898.9	0.776106	0.0648004	11.9769	4.69734e-33	4.87729e-32	AAEL004500	eukaryotic translation elongation factor [Source:VB Community Annotation]			GO:0000166,GO:0003746,GO:0003924,GO:0005525,GO:0006412,GO:0006414	nucleotide binding,translation elongation factor activity,GTPase activity,GTP binding,translation,translational elongation
LOC110675929	104.605	-3.54508	0.296039	-11.975	4.80341e-33	4.98403e-32	AAEL021011
LOC5578713	337.362	1.98153	0.165539	11.9702	5.08913e-33	5.2769e-32	AAEL026747				GO:0000139,GO:0005794,GO:0006486,GO:0016020,GO:0016021,GO:0016757	Golgi membrane,Golgi apparatus,protein glycosylation,membrane,integral component of membrane,transferase activity, transferring glycosyl groups
LOC5573746	762.5	-1.16516	0.0973654	-11.9669	5.29864e-33	5.4904e-32	AAEL000260
LOC5569968	4457.59	2.17559	0.181817	11.9659	5.36438e-33	5.55474e-32	AAEL020092				GO:0005737,GO:0009968	cytoplasm,negative regulation of signal transduction
LOC5569159	4191.38	-1.84818	0.15449	-11.9631	5.54511e-33	5.73799e-32	AAEL023413				GO:0003676	nucleic acid binding
LOC5578785	1043.88	-1.65371	0.138236	-11.963	5.55441e-33	5.7437e-32	AAEL021350	Histone H4 [Source:UniProtKB/TrEMBL;Acc:Q16IE4]
LOC5565959	1141.3	-1.52706	0.127704	-11.9578	5.91199e-33	6.10932e-32	AAEL005064	Clip-Domain Serine Protease family B. [Source:VB Community Annotation]	CLIPB5		GO:0004252,GO:0005576,GO:0006508,GO:0008233,GO:0008236,GO:0016787	serine-type endopeptidase activity,extracellular region,proteolysis,peptidase activity,serine-type peptidase activity,hydrolase activity
LOC5574786	115.276	-3.0128	0.251959	-11.9575	5.93231e-33	6.12617e-32	AAEL011423	sugar transporter [Source:VB Community Annotation]			GO:0016020,GO:0016021,GO:0022857,GO:0055085	membrane,integral component of membrane,transmembrane transporter activity,transmembrane transport
LOC5579186	21474.1	0.901109	0.0753658	11.9565	6.0058e-33	6.19786e-32	AAEL003872	translationally-controlled tumor protein homolog (TCTP) [Source:VB Community Annotation]	Tctp		GO:0005737	cytoplasm
LOC110676157	261.734	-2.70448	0.226296	-11.9511	6.4073e-33	6.60771e-32	AAEL021017
LOC5572710	255.222	-2.06414	0.172867	-11.9406	7.26896e-33	7.49126e-32	AAEL009987				GO:0046872	metal ion binding
LOC110674151	208.793	3.16117	0.26485	11.9357	7.71245e-33	7.94293e-32	AAEL017976	heat shock protein HSP70 [Source:VB Community Annotation]	HSP70Bb
LOC110674749	3124.88	-1.61592	0.135436	-11.9313	8.13053e-33	8.36785e-32	AAEL027190
LOC5566703	664.002	1.26234	0.105832	11.9279	8.47197e-33	8.71337e-32	AAEL005583				GO:0016020,GO:0016021	membrane,integral component of membrane
LOC5575475	729.494	-1.28968	0.108158	-11.9241	8.8689e-33	9.11546e-32	AAEL021703
LOC5577186	342.631	-2.24854	0.188626	-11.9206	9.24086e-33	9.49135e-32	AAEL013065	thiamin pyrophosphokinase [Source:VB Community Annotation]			GO:0016787	hydrolase activity
LOC5580062	891.433	1.21481	0.101912	11.9202	9.2897e-33	9.53509e-32	AAEL002135	tubulin-specific chaperone b (tubulin folding cofactor b) [Source:VB Community Annotation]			GO:0005515	protein binding
LOC5566303	934.648	-1.24778	0.104689	-11.9189	9.43623e-33	9.67897e-32	AAEL005290				GO:0008289	lipid binding
LOC5572946	2410.42	-1.84486	0.154787	-11.9187	9.45656e-33	9.69329e-32	AAEL027340				GO:0004843,GO:0005509,GO:0006508,GO:0006511,GO:0008233,GO:0008234,GO:0016579,GO:0016787,GO:0036459	thiol-dependent ubiquitin-specific protease activity,calcium ion binding,proteolysis,ubiquitin-dependent protein catabolic process,peptidase activity,cysteine-type peptidase activity,protein deubiquitination,hydrolase activity,thiol-dependent ubiquitinyl hydrolase activity
LOC23687432	18177	1.24982	0.104877	11.917	9.64874e-33	9.88363e-32	AAEL017012
LOC5579000	3717.12	-1.10039	0.0923455	-11.916	9.77295e-33	1.00041e-31	AAEL003789	exportin, putative [Source:VB Community Annotation]			GO:0005049,GO:0005634,GO:0005737,GO:0006611,GO:0006886,GO:0008536,GO:0015031	nuclear export signal receptor activity,nucleus,cytoplasm,protein export from nucleus,intracellular protein transport,Ran GTPase binding,protein transport
LOC5574257	3426.17	-1.59502	0.133916	-11.9106	1.04172e-32	1.06565e-31	AAEL011023				GO:0003676	nucleic acid binding
LOC5576056	298.27	-2.31649	0.194619	-11.9027	1.14598e-32	1.17151e-31	AAEL014207	sugar transporter [Source:VB Community Annotation]			GO:0016020,GO:0016021,GO:0022857,GO:0055085	membrane,integral component of membrane,transmembrane transporter activity,transmembrane transport
LOC110678492	386.658	1.51544	0.127356	11.8992	1.19507e-32	1.22088e-31	AAEL026945
LOC5575107	1429.1	-1.48396	0.124787	-11.8919	1.30383e-32	1.3311e-31	AAEL011664				GO:0003676	nucleic acid binding
LOC110676743	89.3372	-3.44505	0.289823	-11.8867	1.38735e-32	1.41541e-31	AAEL022461
LOC5577102	307.224	-1.81718	0.152876	-11.8866	1.389e-32	1.41615e-31	AAEL018251				GO:0000166,GO:0004672,GO:0004674,GO:0005515,GO:0005524,GO:0006468	nucleotide binding,protein kinase activity,protein serine/threonine kinase activity,protein binding,ATP binding,protein phosphorylation
LOC5563723	306.822	-1.70621	0.143542	-11.8865	1.3912e-32	1.41744e-31	AAEL003913	methionine-tRNA synthetase [Source:VB Community Annotation]			GO:0000166,GO:0004812,GO:0004825,GO:0005524,GO:0006412,GO:0006418,GO:0006431,GO:0016874	nucleotide binding,aminoacyl-tRNA ligase activity,methionine-tRNA ligase activity,ATP binding,translation,tRNA aminoacylation for protein translation,methionyl-tRNA aminoacylation,ligase activity
LOC5571891	602.635	-1.65013	0.138828	-11.8862	1.39685e-32	1.42225e-31	AAEL009375	plekhh1 [Source:VB Community Annotation]			GO:0005856	cytoskeleton
LOC5574228	922.669	-1.3035	0.109671	-11.8855	1.40727e-32	1.43189e-31	AAEL021452				GO:0003676,GO:0005634,GO:0008270,GO:0046872	nucleic acid binding,nucleus,zinc ion binding,metal ion binding
LOC5574217	575.949	-1.63505	0.137575	-11.8848	1.41999e-32	1.44388e-31	AAEL010993	queuine tRNA-ribosyltransferase [Source:VB Community Annotation]			GO:0005737,GO:0006400,GO:0008033,GO:0008479,GO:0016740,GO:0016757,GO:0016763,GO:0046872,GO:0101030	cytoplasm,tRNA modification,tRNA processing,queuine tRNA-ribosyltransferase activity,transferase activity,transferase activity, transferring glycosyl groups,transferase activity, transferring pentosyl groups,metal ion binding,tRNA-guanine transglycosylation
LOC110680554	578.358	-1.50707	0.12681	-11.8845	1.42512e-32	1.44813e-31	AAEL025271				GO:0004430	1-phosphatidylinositol 4-kinase activity
LOC5570361	132.659	6.22588	0.524052	11.8803	1.49887e-32	1.52206e-31	AAEL026740
LOC5576366	2038.4	1.04516	0.0879833	11.8791	1.52008e-32	1.54257e-31	AAEL002870	dipeptidyl peptidase iii [Source:VB Community Annotation]			GO:0004177,GO:0005737,GO:0006508,GO:0008233,GO:0008237,GO:0008239,GO:0016787,GO:0046872,GO:0070006	aminopeptidase activity,cytoplasm,proteolysis,peptidase activity,metallopeptidase activity,dipeptidyl-peptidase activity,hydrolase activity,metal ion binding,metalloaminopeptidase activity
LOC5570314	2172.29	1.86253	0.156799	11.8785	1.53136e-32	1.55298e-31	AAEL008250
LOC5570941	2322.3	-1.20077	0.101096	-11.8776	1.54789e-32	1.5687e-31	AAEL008683				GO:0046872	metal ion binding
LOC5570007	5947.98	1.23403	0.103943	11.8721	1.65259e-32	1.67369e-31	AAEL000175	Eukaryotic translation initiation factor 3 subunit C [Source:UniProtKB/Swiss-Prot;Acc:Q17Q06]	eIF3-S8		GO:0001732,GO:0002183,GO:0003723,GO:0003743,GO:0005737,GO:0005852,GO:0006412,GO:0006413,GO:0016282,GO:0031369,GO:0033290	formation of cytoplasmic translation initiation complex,cytoplasmic translational initiation,RNA binding,translation initiation factor activity,cytoplasm,eukaryotic translation initiation factor 3 complex,translation,translational initiation,eukaryotic 43S preinitiation complex,translation initiation factor binding,eukaryotic 48S preinitiation complex
LOC5576548	1346.63	-1.38852	0.117023	-11.8654	1.79138e-32	1.81304e-31	AAEL015016	importin alpha 1a, putative [Source:VB Community Annotation]			GO:0005515,GO:0005634,GO:0005737	protein binding,nucleus,cytoplasm
LOC110680273	609.713	1.29601	0.109237	11.8643	1.81436e-32	1.83508e-31	AAEL027289
LOC5576542	308.833	-1.69339	0.142759	-11.8619	1.86776e-32	1.88784e-31	AAEL027209				GO:0004843,GO:0006508,GO:0006511,GO:0008233,GO:0016020,GO:0016021,GO:0016579,GO:0036459	thiol-dependent ubiquitin-specific protease activity,proteolysis,ubiquitin-dependent protein catabolic process,peptidase activity,membrane,integral component of membrane,protein deubiquitination,thiol-dependent ubiquitinyl hydrolase activity
LOC5567897	92.7784	-3.66195	0.308761	-11.8601	1.90647e-32	1.92569e-31	AAEL006350
LOC5568784	1962.7	1.58404	0.133574	11.8589	1.93415e-32	1.95235e-31	AAEL007135	peroxiredoxin 5, prdx5 [Source:VB Community Annotation]			GO:0004601,GO:0005623,GO:0005782,GO:0016209,GO:0016491,GO:0045454,GO:0051920,GO:0055114,GO:0098869	peroxidase activity,obsolete cell,peroxisomal matrix,antioxidant activity,oxidoreductase activity,cell redox homeostasis,peroxiredoxin activity,oxidation-reduction process,cellular oxidant detoxification
LOC5567422	1673.66	-1.62013	0.136644	-11.8566	1.98983e-32	2.00722e-31	AAEL006073	ubiquitin-conjugating enzyme E2-230k [Source:VB Community Annotation]
LOC23687553	508.229	-1.62448	0.137063	-11.852	2.10024e-32	2.1172e-31	AAEL017133				GO:0016491,GO:0055114	oxidoreductase activity,oxidation-reduction process
LOC5576397	1478.84	-1.47708	0.124685	-11.8465	2.24409e-32	2.26072e-31	AAEL012482				GO:0004842,GO:0016020,GO:0016021,GO:0016567,GO:0046872	ubiquitin-protein transferase activity,membrane,integral component of membrane,protein ubiquitination,metal ion binding
LOC110677751	147.936	-3.35385	0.283209	-11.8423	2.35896e-32	2.37486e-31	AAEL023177
LOC5566015	936.3	-1.56047	0.13185	-11.8352	2.56815e-32	2.58376e-31	AAEL005111				GO:0016020,GO:0016021	membrane,integral component of membrane
LOC5570882	865.11	-1.17471	0.0992747	-11.8329	2.63901e-32	2.6533e-31	AAEL008650				GO:0006508,GO:0016805,GO:0070004	proteolysis,dipeptidase activity,cysteine-type exopeptidase activity
LOC5575705	92.6623	3.95882	0.334679	11.8287	2.77421e-32	2.78738e-31	AAEL012013				GO:0005576,GO:0008061	extracellular region,chitin binding
LOC5569508	378.004	1.70495	0.144182	11.825	2.8976e-32	2.90944e-31	AAEL007680
LOC5576694	104.895	-3.37619	0.285562	-11.823	2.97008e-32	2.98026e-31	AAEL012717	WD-repeat protein [Source:VB Community Annotation]			GO:0005515,GO:0005737,GO:0035556,GO:0042995	protein binding,cytoplasm,intracellular signal transduction,cell projection
LOC5573936	1523.92	-1.21726	0.102989	-11.8194	3.10058e-32	3.10915e-31	AAEL002235				GO:0016020,GO:0016021	membrane,integral component of membrane
LOC5578738	331.97	2.36251	0.199954	11.8153	3.2553e-32	3.26215e-31	AAEL003697	Serine Protease Inhibitor (serpin) homologue - unlikely to be inhibitory. [Source:VB Community Annotation]	SRPN17		GO:0004867,GO:0005615,GO:0010466,GO:0010951,GO:0030414	serine-type endopeptidase inhibitor activity,extracellular space,negative regulation of peptidase activity,negative regulation of endopeptidase activity,peptidase inhibitor activity
LOC5568569	739.296	-1.66143	0.140932	-11.7889	4.45347e-32	4.45991e-31	AAEL001119	DNA-binding protein Ewg, putative [Source:VB Community Annotation]			GO:0003677,GO:0003700,GO:0005634,GO:0006357	DNA binding,DNA-binding transcription factor activity,nucleus,regulation of transcription by RNA polymerase II
LOC5568618	5484.22	1.02674	0.087156	11.7804	4.92394e-32	4.92782e-31	AAEL006977	serine/threonine protein phosphatase 2a regulatory subunit a [Source:VB Community Annotation]
LOC110680228	10932.1	1.01357	0.0860539	11.7784	5.04622e-32	5.04688e-31	AAEL023486	Eukaryotic translation initiation factor 5A (Fragment) [Source:UniProtKB/TrEMBL;Acc:Q1HRN6]
LOC5564652	1093.51	-1.51103	0.128311	-11.7763	5.17199e-32	5.16928e-31	AAEL004379	phosphatidylinositol 4-kinase type-ii [Source:VB Community Annotation]			GO:0000166,GO:0004430,GO:0005524,GO:0016020,GO:0016301,GO:0016310,GO:0016740,GO:0046854	nucleotide binding,1-phosphatidylinositol 4-kinase activity,ATP binding,membrane,kinase activity,phosphorylation,transferase activity,phosphatidylinositol phosphorylation
LOC5565635	2774.18	1.73471	0.147307	11.7762	5.17884e-32	5.17273e-31	AAEL028015				GO:0003839,GO:0006751	gamma-glutamylcyclotransferase activity,glutathione catabolic process
LOC5565900	492.569	-1.78555	0.151651	-11.7741	5.30979e-32	5.30005e-31	AAEL000716	chondroitin 4-sulfotransferase [Source:VB Community Annotation]			GO:0000139,GO:0005794,GO:0005975,GO:0008146,GO:0016020,GO:0016021,GO:0016051,GO:0016740	Golgi membrane,Golgi apparatus,carbohydrate metabolic process,sulfotransferase activity,membrane,integral component of membrane,carbohydrate biosynthetic process,transferase activity
LOC5565688	342.971	2.37118	0.201578	11.7631	6.04888e-32	6.03382e-31	AAEL028092				GO:0000166,GO:0004672,GO:0004713,GO:0004714,GO:0005007,GO:0005524,GO:0006468,GO:0008284,GO:0008543,GO:0016020,GO:0016021,GO:0016301,GO:0016310,GO:0016740,GO:0018108	nucleotide binding,protein kinase activity,protein tyrosine kinase activity,transmembrane receptor protein tyrosine kinase activity,fibroblast growth factor-activated receptor activity,ATP binding,protein phosphorylation,positive regulation of cell population proliferation,fibroblast growth factor receptor signaling pathway,membrane,integral component of membrane,kinase activity,phosphorylation,t…
LOC5570780	5631.17	1.25391	0.106609	11.7617	6.14761e-32	6.1283e-31	AAEL008543	Cdc42 homolog Precursor [Source:VB Community Annotation]	Cdc42		GO:0000166,GO:0003924,GO:0005525,GO:0005886,GO:0005912,GO:0007264,GO:0007275,GO:0016020,GO:0030054,GO:0045185,GO:0045860	nucleotide binding,GTPase activity,GTP binding,plasma membrane,adherens junction,small GTPase mediated signal transduction,multicellular organism development,membrane,cell junction,maintenance of protein location,positive regulation of protein kinase activity
LOC110680326	168.529	-2.68824	0.228569	-11.7612	6.18837e-32	6.1649e-31	AAEL024286
LOC5578144	907.509	-1.38416	0.117699	-11.7602	6.25606e-32	6.22826e-31	AAEL013521	tryptophanyl-tRNA synthetase [Source:VB Community Annotation]			GO:0000166,GO:0004812,GO:0004830,GO:0005524,GO:0006412,GO:0006418,GO:0006436,GO:0016874	nucleotide binding,aminoacyl-tRNA ligase activity,tryptophan-tRNA ligase activity,ATP binding,translation,tRNA aminoacylation for protein translation,tryptophanyl-tRNA aminoacylation,ligase activity
LOC5571941	1584.6	-1.29367	0.110005	-11.7602	6.26051e-32	6.22861e-31	AAEL009428				GO:0005509,GO:0005515	calcium ion binding,protein binding
LOC5571296	2374.57	-1.01446	0.0862639	-11.7599	6.2789e-32	6.24283e-31	AAEL001549	protein kinase c [Source:VB Community Annotation]			GO:0000166,GO:0004672,GO:0004674,GO:0004697,GO:0004698,GO:0005524,GO:0006468,GO:0007165,GO:0016301,GO:0016310,GO:0016740,GO:0017049	nucleotide binding,protein kinase activity,protein serine/threonine kinase activity,protein kinase C activity,calcium-dependent protein kinase C activity,ATP binding,protein phosphorylation,signal transduction,kinase activity,phosphorylation,transferase activity,GTP-Rho binding
LOC5573724	348.666	-2.14099	0.182082	-11.7584	6.39186e-32	6.351e-31	AAEL022743				GO:0042025	host cell nucleus
LOC110676632	138.532	3.34966	0.284956	11.755	6.65466e-32	6.6078e-31	AAEL026312
LOC5577416	296.1	-2.04334	0.173865	-11.7525	6.85892e-32	6.80619e-31	AAEL003171
LOC5574970	947.39	-1.86493	0.158756	-11.7471	7.30634e-32	7.24545e-31	AAEL027527				GO:0003723,GO:0004000,GO:0006396	RNA binding,adenosine deaminase activity,RNA processing
LOC5577336	5435.26	1.34947	0.114912	11.7435	7.63059e-32	7.56208e-31	AAEL018313				GO:0005515,GO:0042981	protein binding,regulation of apoptotic process
LOC5575002	92.2894	4.10912	0.349922	11.743	7.67334e-32	7.5995e-31	AAEL027772				GO:0004252,GO:0006508,GO:0008233,GO:0008236,GO:0016787	serine-type endopeptidase activity,proteolysis,peptidase activity,serine-type peptidase activity,hydrolase activity
LOC5569243	1228.86	2.39671	0.204166	11.739	8.03901e-32	7.95648e-31	AAEL007505	iroquois-class homeodomain protein irx [Source:VB Community Annotation]			GO:0000981,GO:0003677,GO:0005634,GO:0006355,GO:0006357,GO:0043565	DNA-binding transcription factor activity, RNA polymerase II-specific,DNA binding,nucleus,regulation of transcription, DNA-templated,regulation of transcription by RNA polymerase II,sequence-specific DNA binding
LOC5567997	384.4	1.52196	0.129723	11.7324	8.69506e-32	8.60021e-31	AAEL006438	dolichyl glycosyltransferase [Source:VB Community Annotation]			GO:0005783,GO:0005789,GO:0006486,GO:0006488,GO:0016020,GO:0016021,GO:0016740,GO:0016757,GO:0016758,GO:0042281	endoplasmic reticulum,endoplasmic reticulum membrane,protein glycosylation,dolichol-linked oligosaccharide biosynthetic process,membrane,integral component of membrane,transferase activity,transferase activity, transferring glycosyl groups,transferase activity, transferring hexosyl groups,dolichyl pyrophosphate Man9GlcNAc2 alpha-1,3-glucosyltransferase activity
LOC5575774	1003.18	-2.28765	0.195016	-11.7306	8.88463e-32	8.782e-31	AAEL002711
LOC5568317	307.795	-2.08138	0.177435	-11.7304	8.90584e-32	8.79726e-31	AAEL006736				GO:0005515,GO:0016020,GO:0016021	protein binding,membrane,integral component of membrane
LOC5567423	826.248	-1.31883	0.11243	-11.7302	8.92197e-32	8.80748e-31	AAEL006070	Phosphoglycerate mutase [Source:UniProtKB/TrEMBL;Acc:Q177P3]			GO:0003824,GO:0004082,GO:0004619,GO:0006096,GO:0016853,GO:0016868	catalytic activity,bisphosphoglycerate mutase activity,phosphoglycerate mutase activity,glycolytic process,isomerase activity,intramolecular transferase activity, phosphotransferases
LOC5570577	393.853	-1.69281	0.144357	-11.7265	9.32161e-32	9.19603e-31	AAEL008392				GO:0003690,GO:0006355	double-stranded DNA binding,regulation of transcription, DNA-templated
LOC5575230	475.726	-1.76232	0.150289	-11.7263	9.34869e-32	9.21678e-31	AAEL011684				GO:0016020,GO:0016021	membrane,integral component of membrane
LOC5567137	585.865	-1.34172	0.114479	-11.7202	1.00426e-31	9.89452e-31	AAEL005885	arginyltransferase, putative [Source:VB Community Annotation]			GO:0004057,GO:0016598,GO:0016740,GO:0016746	arginyltransferase activity,protein arginylation,transferase activity,transferase activity, transferring acyl groups
LOC5567723	528.307	-1.31016	0.111789	-11.7199	1.00746e-31	9.91962e-31	AAEL006294				GO:0005515,GO:0006491,GO:0016020,GO:0016021	protein binding,N-glycan processing,membrane,integral component of membrane
LOC5579942	2424.05	-1.54871	0.132362	-11.7005	1.26631e-31	1.24602e-30	AAEL018124
LOC5568359	141.001	4.11848	0.352035	11.6991	1.28831e-31	1.26685e-30	AAEL001084	Clip-Domain Serine Protease family B. Protease homologue. [Source:VB Community Annotation]	CLIPB21		GO:0004252,GO:0006508	serine-type endopeptidase activity,proteolysis
LOC5579656	8624.68	0.800148	0.0684255	11.6937	1.37274e-31	1.34901e-30	AAEL003968	helicase [Source:VB Community Annotation]			GO:0000166,GO:0003676,GO:0003677,GO:0004386,GO:0005524,GO:0005634,GO:0006338,GO:0016589,GO:0016787,GO:0016818,GO:0016887,GO:0031491,GO:0043044	nucleotide binding,nucleic acid binding,DNA binding,helicase activity,ATP binding,nucleus,chromatin remodeling,NURF complex,hydrolase activity,hydrolase activity, acting on acid anhydrides, in phosphorus-containing anhydrides,ATPase activity,nucleosome binding,ATP-dependent chromatin remodeling
LOC5567329	5571.58	-1.17334	0.100404	-11.6862	1.49969e-31	1.47281e-30	AAEL005997	allergen, putative [Source:VB Community Annotation]			GO:0008289	lipid binding
LOC5578321	662.998	-1.33942	0.114624	-11.6853	1.51487e-31	1.48676e-30	AAEL013639				GO:0016020,GO:0016021	membrane,integral component of membrane
LOC110679283	83.2216	-3.69778	0.316678	-11.6768	1.67504e-31	1.6429e-30	AAEL024111
LOC5579129	143.788	3.27966	0.280879	11.6764	1.6828e-31	1.64944e-30	AAEL014006				GO:0003676	nucleic acid binding
LOC5569514	6594.43	1.13198	0.0969821	11.672	1.77137e-31	1.73515e-30	AAEL007702	chaperonin [Source:VB Community Annotation]			GO:0000166,GO:0005524,GO:0005737,GO:0006457,GO:0051082	nucleotide binding,ATP binding,cytoplasm,protein folding,unfolded protein binding
LOC5574802	1762.82	1.67846	0.143838	11.6691	1.83359e-31	1.79494e-30	AAEL024570				GO:0000166,GO:0004672,GO:0004713,GO:0004715,GO:0005524,GO:0006468,GO:0016301,GO:0016310,GO:0016740,GO:0018108	nucleotide binding,protein kinase activity,protein tyrosine kinase activity,non-membrane spanning protein tyrosine kinase activity,ATP binding,protein phosphorylation,kinase activity,phosphorylation,transferase activity,peptidyl-tyrosine phosphorylation
LOC5578744	185.951	-2.27446	0.194922	-11.6686	1.84507e-31	1.80501e-30	AAEL020575
LOC5566166	479.151	-1.41077	0.120928	-11.6662	1.89622e-31	1.85386e-30	AAEL005221	internalin A, putative [Source:VB Community Annotation]			GO:0005515	protein binding
LOC5569050	655.484	3.35288	0.287463	11.6637	1.95387e-31	1.90901e-30	AAEL007349				GO:0005765,GO:0010008,GO:0016020,GO:0016021,GO:0046872	lysosomal membrane,endosome membrane,membrane,integral component of membrane,metal ion binding
LOC5574453	302.437	-2.51008	0.215258	-11.6608	2.02194e-31	1.97425e-30	AAEL011172				GO:0016787	hydrolase activity
LOC5565617	352.037	1.60524	0.137689	11.6584	2.0786e-31	2.02826e-30	AAEL004868	hemomucin [Source:VB Community Annotation]			GO:0009058,GO:0016844	biosynthetic process,strictosidine synthase activity
LOC5577620	898.702	-1.11784	0.0958924	-11.6573	2.10659e-31	2.05426e-30	AAEL003245	IMD pathway signalling I-Kappa-B Kinase 1 (IKK1 IKK-beta). (ird5 orthologue immune response deficient 5) [Source:VB Community Annotation]	IKK1		GO:0004672,GO:0005524,GO:0006468	protein kinase activity,ATP binding,protein phosphorylation
LOC5564298	2247.99	-0.959839	0.0823401	-11.657	2.11336e-31	2.05901e-30	AAEL000589	serine/threonine protein kinase [Source:VB Community Annotation]			GO:0004672,GO:0005524,GO:0006468	protein kinase activity,ATP binding,protein phosphorylation
LOC5568072	1611.9	1.39754	0.119889	11.657	2.11416e-31	2.05901e-30	AAEL006514	sodium-dependent phosphate transporter [Source:VB Community Annotation]			GO:0016020,GO:0016021,GO:0022857,GO:0055085	membrane,integral component of membrane,transmembrane transporter activity,transmembrane transport
LOC5566289	2286.99	-1.56988	0.134715	-11.6533	2.20664e-31	2.1477e-30	AAEL018120	Ribosomal protein S6 kinase [Source:UniProtKB/TrEMBL;Acc:Q535V4]			GO:0000166,GO:0004672,GO:0004674,GO:0005515,GO:0005524,GO:0006468,GO:0007165,GO:0016301,GO:0016310,GO:0016740	nucleotide binding,protein kinase activity,protein serine/threonine kinase activity,protein binding,ATP binding,protein phosphorylation,signal transduction,kinase activity,phosphorylation,transferase activity
LOC5570088	568.012	2.26004	0.193981	11.6508	2.27194e-31	2.20985e-30	AAEL001355				GO:0016020,GO:0016021	membrane,integral component of membrane
LOC5567164	347.052	2.84718	0.244418	11.6488	2.32625e-31	2.26123e-30	AAEL005908	rolling pebbles [Source:VB Community Annotation]			GO:0005515,GO:0016740,GO:0046872	protein binding,transferase activity,metal ion binding
LOC110676724	990.571	-1.30531	0.112087	-11.6455	2.41842e-31	2.34933e-30	AAEL027808				GO:0046872	metal ion binding
LOC110676733	2115.46	-1.22204	0.104946	-11.6445	2.44763e-31	2.37467e-30	AAEL003685	Histone H3 [Source:UniProtKB/TrEMBL;Acc:Q16N56]			GO:0000786,GO:0003677,GO:0005634,GO:0046982	nucleosome,DNA binding,nucleus,protein heterodimerization activity
LOC5578783	2115.46	-1.22204	0.104946	-11.6445	2.44763e-31	2.37467e-30	AAEL019635	Histone H3 [Source:UniProtKB/TrEMBL;Acc:Q16N56]			GO:0000786,GO:0003677,GO:0005634,GO:0046982	nucleosome,DNA binding,nucleus,protein heterodimerization activity
LOC5569714	129.563	4.03878	0.346845	11.6443	2.45195e-31	2.37735e-30	AAEL028221
LOC5575394	311.981	2.78485	0.239177	11.6435	2.47748e-31	2.40057e-30	AAEL019974				GO:0005254,GO:0005886,GO:0006811,GO:0006821,GO:0016020,GO:0016021,GO:0034707,GO:1902476	chloride channel activity,plasma membrane,ion transport,chloride transport,membrane,integral component of membrane,chloride channel complex,chloride transmembrane transport
LOC110681235	1955.49	1.64041	0.140904	11.642	2.51899e-31	2.43924e-30	AAEL025170				GO:0004014,GO:0006597,GO:0008295	adenosylmethionine decarboxylase activity,spermine biosynthetic process,spermidine biosynthetic process
LOC5564492	929.121	-1.19539	0.102755	-11.6333	2.79031e-31	2.70025e-30	AAEL004294	dihydrolipoamide acetyltransferase component of pyruvate dehydrogenase [Source:VB Community Annotation]			GO:0004742,GO:0006090,GO:0016746,GO:0030523,GO:0045254	dihydrolipoyllysine-residue acetyltransferase activity,pyruvate metabolic process,transferase activity, transferring acyl groups,dihydrolipoamide S-acyltransferase activity,pyruvate dehydrogenase complex
LOC110675519	181.623	3.96848	0.341152	11.6326	2.814e-31	2.72145e-30	AAEL020128				GO:0005515	protein binding
LOC5579472	6269.69	1.09004	0.0937147	11.6315	2.85115e-31	2.75563e-30	AAEL007650	Chaperonin [Source:UniProtKB/TrEMBL;Acc:A0A1S4FHA0]			GO:0000166,GO:0005524,GO:0005737,GO:0005829,GO:0005832,GO:0006457,GO:0051082	nucleotide binding,ATP binding,cytoplasm,cytosol,chaperonin-containing T-complex,protein folding,unfolded protein binding
LOC5578053	343.18	1.75889	0.151228	11.6307	2.8773e-31	2.77914e-30	AAEL013490				GO:0016020,GO:0016021,GO:0030001,GO:0046873,GO:0055085	membrane,integral component of membrane,metal ion transport,metal ion transmembrane transporter activity,transmembrane transport
LOC5569127	152.578	3.36769	0.289684	11.6254	3.06083e-31	2.95454e-30	AAEL007386				GO:0005267,GO:0006811,GO:0006813,GO:0016020,GO:0016021,GO:0071805	potassium channel activity,ion transport,potassium ion transport,membrane,integral component of membrane,potassium ion transmembrane transport
LOC5576360	486.662	-1.40715	0.121053	-11.6243	3.10161e-31	2.992e-30	AAEL002860	Mitochondrial pyruvate carrier [Source:UniProtKB/TrEMBL;Acc:Q17GV8]			GO:0005739,GO:0005743,GO:0006850,GO:0016020,GO:0016021	mitochondrion,mitochondrial inner membrane,mitochondrial pyruvate transmembrane transport,membrane,integral component of membrane
LOC5573081	107.038	3.19158	0.274702	11.6183	3.3256e-31	3.20605e-30	AAEL025309				GO:0004252,GO:0006508,GO:0008233,GO:0008236,GO:0016020,GO:0016021,GO:0016787	serine-type endopeptidase activity,proteolysis,peptidase activity,serine-type peptidase activity,membrane,integral component of membrane,hydrolase activity
LOC5565616	1767.44	-1.0681	0.0919598	-11.6149	3.46335e-31	3.33674e-30	AAEL004869				GO:0003676	nucleic acid binding
LOC5568744	121.059	-4.15583	0.357855	-11.6132	3.5335e-31	3.40216e-30	AAEL007090	4-nitrophenylphosphatase [Source:UniProtKB/TrEMBL;Acc:Q0IF21]			GO:0016787	hydrolase activity
LOC5570857	3128.05	-1.49054	0.128366	-11.6117	3.59535e-31	3.45953e-30	AAEL008634	jnk [Source:VB Community Annotation]			GO:0000165,GO:0004672,GO:0004674,GO:0004707,GO:0005524,GO:0006468,GO:0016301,GO:0016310,GO:0016740	MAPK cascade,protein kinase activity,protein serine/threonine kinase activity,MAP kinase activity,ATP binding,protein phosphorylation,kinase activity,phosphorylation,transferase activity
LOC5578495	582.764	3.63621	0.313197	11.61	3.66819e-31	3.52739e-30	AAEL002335	atbf1 [Source:VB Community Annotation]			GO:0000981,GO:0003676,GO:0003677,GO:0005634,GO:0006355,GO:0006357,GO:0008270,GO:0043565	DNA-binding transcription factor activity, RNA polymerase II-specific,nucleic acid binding,DNA binding,nucleus,regulation of transcription, DNA-templated,regulation of transcription by RNA polymerase II,zinc ion binding,sequence-specific DNA binding
LOC5568875	263.344	-2.18469	0.18821	-11.6077	3.76491e-31	3.61812e-30	AAEL020233				GO:0008418,GO:0016787,GO:0016811,GO:0070773	protein-N-terminal asparagine amidohydrolase activity,hydrolase activity,hydrolase activity, acting on carbon-nitrogen (but not peptide) bonds, in linear amides,protein-N-terminal glutamine amidohydrolase activity
LOC5569629	1811.6	-1.97166	0.169904	-11.6045	3.90808e-31	3.75334e-30	AAEL007787	5-aminolevulinic acid synthase [Source:VB Community Annotation]			GO:0003824,GO:0003870,GO:0005739,GO:0005759,GO:0006778,GO:0006782,GO:0006783,GO:0009058,GO:0016740,GO:0016746,GO:0030170,GO:0033014	catalytic activity,5-aminolevulinate synthase activity,mitochondrion,mitochondrial matrix,porphyrin-containing compound metabolic process,protoporphyrinogen IX biosynthetic process,heme biosynthetic process,biosynthetic process,transferase activity,transferase activity, transferring acyl groups,pyridoxal phosphate binding,tetrapyrrole biosynthetic process
LOC5570605	1058.93	-1.6918	0.145793	-11.6041	3.92575e-31	3.76793e-30	AAEL027597				GO:0004672,GO:0005524,GO:0006468	protein kinase activity,ATP binding,protein phosphorylation
LOC5578184	3427.39	1.2693	0.10941	11.6014	4.05611e-31	3.8906e-30	AAEL003469	NHP2 protein, putative [Source:VB Community Annotation]
LOC5565555	643.573	1.38301	0.119262	11.5964	4.29725e-31	4.1193e-30	AAEL004846	Protein lin-7 homolog [Source:UniProtKB/TrEMBL;Acc:Q0IFH1]			GO:0005515,GO:0005886,GO:0006887,GO:0007269,GO:0015031,GO:0016020,GO:0016323,GO:0030054,GO:0097016,GO:0097025,GO:0098793	protein binding,plasma membrane,exocytosis,neurotransmitter secretion,protein transport,membrane,basolateral plasma membrane,cell junction,L27 domain binding,MPP7-DLG1-LIN7 complex,presynapse
LOC5578624	108.557	2.95377	0.254815	11.5918	4.53566e-31	4.34511e-30	AAEL003597	leucine-rich transmembrane protein [Source:VB Community Annotation]			GO:0005515,GO:0016020,GO:0016021	protein binding,membrane,integral component of membrane
LOC5573704	3658.77	-1.12446	0.0970426	-11.5873	4.78213e-31	4.57834e-30	AAEL010698	importin beta-4 [Source:VB Community Annotation]			GO:0005515,GO:0005634,GO:0005737,GO:0006606,GO:0006886,GO:0008536,GO:0015031	protein binding,nucleus,cytoplasm,protein import into nucleus,intracellular protein transport,Ran GTPase binding,protein transport
LOC110677788	3319.41	-1.06592	0.0920227	-11.5832	5.01181e-31	4.79522e-30	AAEL008027				GO:0005515,GO:0005634,GO:0005694,GO:0008168,GO:0016740,GO:0032259,GO:0034773,GO:0042799	protein binding,nucleus,chromosome,methyltransferase activity,transferase activity,methylation,histone H4-K20 trimethylation,histone methyltransferase activity (H4-K20 specific)
LOC110681459	348.018	-1.89799	0.163865	-11.5826	5.04698e-31	4.82584e-30	AAEL024885
LOC5564935	1282.07	-1.39972	0.120851	-11.5822	5.07137e-31	4.84612e-30	AAEL004489	Daxx-like protein [Source:VB Community Annotation]	DLP
LOC5566936	2081.56	1.02496	0.0884983	11.5817	5.10515e-31	4.87534e-30	AAEL005699	membrane protein tms1d [Source:VB Community Annotation]			GO:0006658,GO:0006665,GO:0016020,GO:0016021	phosphatidylserine metabolic process,sphingolipid metabolic process,membrane,integral component of membrane
LOC5578955	698.721	-1.28271	0.110772	-11.5797	5.21985e-31	4.98175e-30	AAEL013936	Serine Protease Inhibitor (serpin) likely cleavage at I/S. Transcript A. [Source:VB Community Annotation]	SRPN4		GO:0004867,GO:0005615,GO:0010466,GO:0010951,GO:0030414	serine-type endopeptidase inhibitor activity,extracellular space,negative regulation of peptidase activity,negative regulation of endopeptidase activity,peptidase inhibitor activity
LOC5568276	1382.24	-1.0261	0.0886373	-11.5763	5.43217e-31	5.18114e-30	AAEL006715	DNA polymerase iota [Source:VB Community Annotation]			GO:0003684,GO:0006281	damaged DNA binding,DNA repair
LOC23687759	875.557	-1.414	0.12215	-11.5759	5.45718e-31	5.20174e-30	AAEL022698				GO:0005515,GO:0051260	protein binding,protein homooligomerization
LOC5568982	844.556	-1.18556	0.102432	-11.5741	5.57746e-31	5.31306e-30	AAEL007279				GO:0003677,GO:0003700,GO:0005634,GO:0005667,GO:0006355	DNA binding,DNA-binding transcription factor activity,nucleus,transcription regulator complex,regulation of transcription, DNA-templated
LOC5571138	1275.38	-1.10939	0.0958667	-11.5722	5.70086e-31	5.42722e-30	AAEL008833
LOC5574331	301.99	-1.73853	0.150261	-11.5701	5.84155e-31	5.55768e-30	AAEL002331	Mannose-6-phosphate isomerase [Source:UniProtKB/TrEMBL;Acc:Q17IJ3]			GO:0004476,GO:0005975,GO:0008270,GO:0009298,GO:0016853,GO:0046872	mannose-6-phosphate isomerase activity,carbohydrate metabolic process,zinc ion binding,GDP-mannose biosynthetic process,isomerase activity,metal ion binding
LOC5573467	2718.23	-1.32582	0.114633	-11.5658	6.14436e-31	5.84213e-30	AAEL010506	GTP-binding protein alpha subunit, gna [Source:VB Community Annotation]			GO:0001664,GO:0003924,GO:0005525,GO:0007165,GO:0007186,GO:0019001,GO:0031683	G protein-coupled receptor binding,GTPase activity,GTP binding,signal transduction,G protein-coupled receptor signaling pathway,guanyl nucleotide binding,G-protein beta/gamma-subunit complex binding
LOC5577915	1080.84	1.06703	0.0923302	11.5566	6.83349e-31	6.49331e-30	AAEL003336	tRNA-splicing ligase RtcB homolog [Source:UniProtKB/Swiss-Prot;Acc:Q17FP1]			GO:0000166,GO:0003972,GO:0005524,GO:0005525,GO:0006388,GO:0006396,GO:0008033,GO:0008452,GO:0016874,GO:0016886,GO:0046872,GO:0072669	nucleotide binding,RNA ligase (ATP) activity,ATP binding,GTP binding,tRNA splicing, via endonucleolytic cleavage and ligation,RNA processing,tRNA processing,RNA ligase activity,ligase activity,ligase activity, forming phosphoric ester bonds,metal ion binding,tRNA-splicing ligase complex
LOC5569082	192.837	2.17581	0.188344	11.5523	7.18562e-31	6.82365e-30	AAEL001202				GO:0005783,GO:0005789,GO:0006506,GO:0016020,GO:0016021	endoplasmic reticulum,endoplasmic reticulum membrane,GPI anchor biosynthetic process,membrane,integral component of membrane
LOC5565704	501.867	-1.60887	0.139284	-11.551	7.29917e-31	6.92716e-30	AAEL022490	CDP-diacylglycerol--glycerol-3-phosphate 3-phosphatidyltransferase [Source:UniProtKB/TrEMBL;Acc:A0A1S4G3N2]			GO:0000166,GO:0003824,GO:0005524,GO:0005739,GO:0006629,GO:0006655,GO:0008444,GO:0008654,GO:0016042,GO:0016740,GO:0032049	nucleotide binding,catalytic activity,ATP binding,mitochondrion,lipid metabolic process,phosphatidylglycerol biosynthetic process,CDP-diacylglycerol-glycerol-3-phosphate 3-phosphatidyltransferase activity,phospholipid biosynthetic process,lipid catabolic process,transferase activity,cardiolipin biosynthetic process
LOC5568579	325.421	-2.52856	0.218974	-11.5473	7.61815e-31	7.22539e-30	AAEL001151	n-acetylgalactosaminyltransferase [Source:VB Community Annotation]			GO:0000139,GO:0005794,GO:0006486,GO:0016020,GO:0016021,GO:0016740,GO:0016757,GO:0030246	Golgi membrane,Golgi apparatus,protein glycosylation,membrane,integral component of membrane,transferase activity,transferase activity, transferring glycosyl groups,carbohydrate binding
LOC5575792	421.613	1.66307	0.144054	11.5447	7.84728e-31	7.43807e-30	AAEL012064	Niemann-Pick Type C-2, putative [Source:VB Community Annotation]			GO:0005576,GO:0005623,GO:0032367	extracellular region,obsolete cell,intracellular cholesterol transport
LOC5565621	1820.43	-0.97124	0.0841364	-11.5436	7.94899e-31	7.52979e-30	AAEL020696				GO:0006812,GO:0006829,GO:0008324,GO:0016020,GO:0016021,GO:0055085,GO:0098655	cation transport,zinc ion transport,cation transmembrane transporter activity,membrane,integral component of membrane,transmembrane transport,cation transmembrane transport
LOC5569849	1266.05	-1.31088	0.113576	-11.5419	8.11174e-31	7.67918e-30	AAEL019715				GO:0005509,GO:0005515	calcium ion binding,protein binding
LOC5575827	1589.48	-1.25919	0.109115	-11.54	8.29456e-31	7.84737e-30	AAEL012107	nanos [Source:VB Community Annotation]	NOS		GO:0003723,GO:0005737,GO:0006417,GO:0008270,GO:0046872	RNA binding,cytoplasm,regulation of translation,zinc ion binding,metal ion binding
LOC5578265	717.813	-1.32882	0.115158	-11.5391	8.38374e-31	7.92683e-30	AAEL003493	GDI interacting protein, putative [Source:VB Community Annotation]			GO:0005515	protein binding
LOC110680236	1701.14	-1.34056	0.116211	-11.5355	8.73514e-31	8.25395e-30	AAEL022013				GO:0003677,GO:0005515,GO:0008270	DNA binding,protein binding,zinc ion binding
LOC5570801	5838.39	0.949544	0.0823504	11.5305	9.25623e-31	8.74091e-30	AAEL008575	regulator of chromosome condensation [Source:VB Community Annotation]
LOC5572990	5260.05	-1.18673	0.102922	-11.5304	9.27515e-31	8.75335e-30	AAEL001939				GO:0000166,GO:0003676,GO:0005524,GO:0007275,GO:0007283,GO:0030154,GO:0031047,GO:0051321	nucleotide binding,nucleic acid binding,ATP binding,multicellular organism development,spermatogenesis,cell differentiation,gene silencing by RNA,meiotic cell cycle
LOC110680390	118.67	-2.97055	0.257695	-11.5274	9.60248e-31	9.05666e-30	AAEL027762				GO:0015267,GO:0016020,GO:0055085	channel activity,membrane,transmembrane transport
LOC5569935	1326.82	-1.58002	0.137081	-11.5262	9.73384e-31	9.17486e-30	AAEL026494				GO:0005515,GO:0034773,GO:0042799	protein binding,histone H4-K20 trimethylation,histone methyltransferase activity (H4-K20 specific)
LOC5572167	666.922	-1.38226	0.119932	-11.5253	9.83533e-31	9.2648e-30	AAEL023148				GO:0005515	protein binding
LOC5564124	158.013	2.67404	0.232179	11.5172	1.08108e-30	1.01774e-29	AAEL004086	aldo-keto reductase [Source:VB Community Annotation]			GO:0016491,GO:0055114	oxidoreductase activity,oxidation-reduction process
LOC5576668	4566.11	-1.80088	0.156419	-11.5132	1.13212e-30	1.06513e-29	AAEL019875				GO:0004652,GO:0016779,GO:0043631	polynucleotide adenylyltransferase activity,nucleotidyltransferase activity,RNA polyadenylation
LOC5565232	839.838	-1.20595	0.104774	-11.51	1.17463e-30	1.10444e-29	AAEL004663	pseudouridylate synthase [Source:VB Community Annotation]			GO:0001522,GO:0003723,GO:0008033,GO:0009451,GO:0009982,GO:0016853,GO:0106029	pseudouridine synthesis,RNA binding,tRNA processing,RNA modification,pseudouridine synthase activity,isomerase activity,tRNA pseudouridine synthase activity
LOC110674343	86.6827	4.62871	0.402191	11.5087	1.19219e-30	1.12026e-29	AAEL022520				GO:0006629,GO:0016788	lipid metabolic process,hydrolase activity, acting on ester bonds
LOC5569656	443.192	1.63478	0.142057	11.508	1.20265e-30	1.12939e-29	AAEL007804	semaphorin [Source:VB Community Annotation]			GO:0005515,GO:0007275,GO:0007399,GO:0016020,GO:0016021,GO:0030154,GO:0030215	protein binding,multicellular organism development,nervous system development,membrane,integral component of membrane,cell differentiation,semaphorin receptor binding
LOC5575873	1775.22	1.31929	0.114656	11.5065	1.22376e-30	1.14851e-29	AAEL012143	caspase (short) [Source:VB Community Annotation]	CASPS7		GO:0004197,GO:0006508,GO:0006915,GO:0008233,GO:0008234,GO:0016787	cysteine-type endopeptidase activity,proteolysis,apoptotic process,peptidase activity,cysteine-type peptidase activity,hydrolase activity
LOC5566917	171.714	4.44029	0.386264	11.4955	1.38974e-30	1.30348e-29	AAEL005692				GO:0004725,GO:0006470,GO:0016020,GO:0016021,GO:0016311,GO:0016791,GO:0030054,GO:0030141,GO:0030658,GO:0031410,GO:0035335,GO:0035773,GO:0045202	protein tyrosine phosphatase activity,protein dephosphorylation,membrane,integral component of membrane,dephosphorylation,phosphatase activity,cell junction,secretory granule,transport vesicle membrane,cytoplasmic vesicle,peptidyl-tyrosine dephosphorylation,insulin secretion involved in cellular response to glucose stimulus,synapse
LOC110680812	145.356	7.10314	0.617914	11.4954	1.39199e-30	1.30478e-29	AAEL028140
LOC5566291	1631.53	-1.64353	0.142977	-11.495	1.39727e-30	1.30893e-29	AAEL019423				GO:0005096,GO:0005515,GO:0043547	GTPase activator activity,protein binding,positive regulation of GTPase activity
LOC5571277	2367.77	0.963712	0.083904	11.4859	1.55324e-30	1.45414e-29	AAEL019617				GO:0000977,GO:0003677,GO:0005634,GO:0045944,GO:0046983	RNA polymerase II transcription regulatory region sequence-specific DNA binding,DNA binding,nucleus,positive regulation of transcription by RNA polymerase II,protein dimerization activity
LOC5572369	271.239	2.77249	0.241435	11.4834	1.59845e-30	1.49555e-29	AAEL009748	2-hydroxyphytanoyl-coa lyase [Source:UniProtKB/TrEMBL;Acc:Q16UY3]			GO:0000287,GO:0003824,GO:0030976	magnesium ion binding,catalytic activity,thiamine pyrophosphate binding
LOC5565528	127.451	-2.88765	0.251619	-11.4763	1.73512e-30	1.62243e-29	AAEL004861	peroxisomal integral membrane protein Per8p, putative [Source:VB Community Annotation]			GO:0046872	metal ion binding
LOC5575730	132.616	3.08783	0.269068	11.476	1.74076e-30	1.6267e-29	AAEL012037	sulphate transporter [Source:VB Community Annotation]			GO:0008271,GO:0008272,GO:0015116,GO:0016020,GO:0016021,GO:0055085,GO:1902358	secondary active sulfate transmembrane transporter activity,sulfate transport,sulfate transmembrane transporter activity,membrane,integral component of membrane,transmembrane transport,sulfate transmembrane transport
LOC5566172	3262.16	1.20584	0.105144	11.4684	1.90192e-30	1.77621e-29	AAEL005216				GO:0008152,GO:0016787,GO:0016798,GO:0016829,GO:0046872	metabolic process,hydrolase activity,hydrolase activity, acting on glycosyl bonds,lyase activity,metal ion binding
LOC5575668	1653.35	1.54876	0.135098	11.464	2.00076e-30	1.86738e-29	AAEL002687	sterol carrier protein-2, putative [Source:VB Community Annotation]			GO:0003824,GO:0005737,GO:0005739,GO:0005777,GO:0006869,GO:0008289,GO:0016740,GO:0016746,GO:0016747,GO:0033814,GO:0050632	catalytic activity,cytoplasm,mitochondrion,peroxisome,lipid transport,lipid binding,transferase activity,transferase activity, transferring acyl groups,transferase activity, transferring acyl groups other than amino-acyl groups,propanoyl-CoA C-acyltransferase activity,propionyl-CoA C2-trimethyltridecanoyltransferase activity
LOC110674266	85.1358	3.91417	0.341503	11.4616	2.05723e-30	1.91891e-29	AAEL020748				GO:0005576,GO:0008061	extracellular region,chitin binding
LOC110678297	498.032	-1.48675	0.129753	-11.4583	2.13665e-30	1.99177e-29	AAEL022337
LOC5578148	868.767	-1.05014	0.0916503	-11.4582	2.13989e-30	1.99357e-29	AAEL013541	syntaxin [Source:VB Community Annotation]			GO:0005484,GO:0006886,GO:0016020,GO:0016192	SNAP receptor activity,intracellular protein transport,membrane,vesicle-mediated transport
LOC5578102	102.146	-3.36194	0.293626	-11.4497	2.35863e-30	2.19601e-29	AAEL003406				GO:0005515	protein binding
LOC5565979	17459.2	0.933967	0.0815894	11.4472	2.4295e-30	2.2606e-29	AAEL005097	cold induced protein (BnC24A), putative [Source:VB Community Annotation]			GO:0003735,GO:0005840,GO:0006412	structural constituent of ribosome,ribosome,translation
LOC5565777	2718.5	0.946355	0.0826739	11.4468	2.43878e-30	2.26785e-29	AAEL004984	cullin-associated NEDD8-dissociated protein 1 [Source:VB Community Annotation]			GO:0010265	SCF complex assembly
LOC5572344	402.562	3.1022	0.271055	11.4449	2.4935e-30	2.31733e-29	AAEL009736
LOC5565350	2001.34	2.87231	0.251038	11.4417	2.5867e-30	2.40248e-29	AAEL004741	aquaporin transporter [Source:VB Community Annotation]			GO:0015267,GO:0016020,GO:0016021,GO:0055085	channel activity,membrane,integral component of membrane,transmembrane transport
LOC5578779	1628.46	-1.87052	0.163508	-11.4399	2.64058e-30	2.44954e-29	AAEL003706	Histone H2A [Source:UniProtKB/TrEMBL;Acc:Q17ER8]			GO:0000786,GO:0003677,GO:0005634,GO:0005694,GO:0046982	nucleosome,DNA binding,nucleus,chromosome,protein heterodimerization activity
LOC5578782	1628.46	-1.87052	0.163508	-11.4399	2.64058e-30	2.44954e-29	AAEL003706	Histone H2A [Source:UniProtKB/TrEMBL;Acc:Q17ER8]			GO:0000786,GO:0003677,GO:0005634,GO:0005694,GO:0046982	nucleosome,DNA binding,nucleus,chromosome,protein heterodimerization activity
LOC5570570	206.75	-2.13775	0.186896	-11.4382	2.69547e-30	2.49893e-29	AAEL024654				GO:0005515	protein binding
LOC5573668	113.341	3.74811	0.327888	11.431	2.92572e-30	2.71074e-29	AAEL010676	regulator of g protein signaling [Source:VB Community Annotation]			GO:0007186,GO:0008277,GO:0009968,GO:0035556	G protein-coupled receptor signaling pathway,regulation of G protein-coupled receptor signaling pathway,negative regulation of signal transduction,intracellular signal transduction
LOC5579061	580.409	2.53407	0.221855	11.4222	3.23863e-30	2.99883e-29	AAEL013997	guanine nucleotide-binding protein beta 3 (g protein beta3) [Source:VB Community Annotation]			GO:0005515,GO:0007165	protein binding,signal transduction
LOC5564410	102.59	3.07933	0.269621	11.4209	3.28716e-30	3.04192e-29	AAEL019686
LOC5580272	2160.49	-1.00191	0.0877497	-11.4178	3.40701e-30	3.15091e-29	AAEL003005
LOC5567548	75.7576	-4.29089	0.375891	-11.4153	3.50888e-30	3.24316e-29	AAEL006137	Serine Protease Inhibitor (serpin) homologue - unlikely to be inhibitory. [Source:VB Community Annotation]	SRPN19		GO:0004867,GO:0005615,GO:0010466,GO:0010951,GO:0030414	serine-type endopeptidase inhibitor activity,extracellular space,negative regulation of peptidase activity,negative regulation of endopeptidase activity,peptidase inhibitor activity
LOC5571929	1055.94	-1.09986	0.0963799	-11.4117	3.65431e-30	3.37553e-29	AAEL009388	Coiled-coil domain-containing protein 22 homolog [Source:UniProtKB/Swiss-Prot;Acc:Q16VW9]			GO:0003674,GO:0005575,GO:0008150	molecular_function,cellular_component,biological_process
LOC5580112	134.341	2.92816	0.256638	11.4097	3.74107e-30	3.45357e-29	AAEL010938	l-asparaginase [Source:VB Community Annotation]			GO:0004067,GO:0006508,GO:0008798,GO:0016787	asparaginase activity,proteolysis,beta-aspartyl-peptidase activity,hydrolase activity
LOC110681114	3645.04	-1.17605	0.103079	-11.4093	3.7584e-30	3.46747e-29	AAEL025330				GO:0008289	lipid binding
LOC5579813	364.445	2.43778	0.213825	11.4008	4.14248e-30	3.81951e-29	AAEL005530				GO:0003824,GO:0005576,GO:0005975,GO:0006030,GO:0008061	catalytic activity,extracellular region,carbohydrate metabolic process,chitin metabolic process,chitin binding
LOC110680809	499.551	-1.41442	0.12409	-11.3984	4.25903e-30	3.92459e-29	AAEL024170				GO:0046872	metal ion binding
[truncated: 17,607 more rows]
