# Supplementary material for: Engineered Antiviral Sensor Targets Infected Mosquitoes
Source: bioRxiv preprint, doi:10.1101/2023.01.27.525922, version 1 (2023-01-27)
Supplement: Table S12 [file 525922_file14.xlsx]

## Sheet: Sheet1
NCBI_ID	baseMean	log2FoldChange	lfcSE	stat	pvalue	padj	AAEL_ID	gene_description	gene_name	gene_synomym	GO_ID	GO_name
LOC110675279	14110.5	-4.32635	0.129228	-33.4784	9.94889e-246	1.45164e-241	AAEL023797
LOC5568820	3220.57	-2.7765	0.0987699	-28.1108	7.23774e-174	5.28029e-170	AAEL001176	s-adenosylmethionine decarboxylase [Source:VB Community Annotation]			GO:0004014,GO:0006557,GO:0006596,GO:0006597,GO:0008295,GO:0016829,GO:0016831	adenosylmethionine decarboxylase activity,S-adenosylmethioninamine biosynthetic process,polyamine biosynthetic process,spermine biosynthetic process,spermidine biosynthetic process,lyase activity,carboxy-lyase activity
LOC5578335	17278.8	-4.47667	0.166217	-26.9326	9.11764e-160	4.43452e-156	AAEL003547
LOC110680865	2069.52	-3.51784	0.133028	-26.4444	4.22858e-154	1.54248e-150	AAEL021425				GO:0003676,GO:0005515	nucleic acid binding,protein binding
LOC5573744	2066.26	3.04283	0.120961	25.1554	1.23471e-139	3.60314e-136	AAEL019937	Superoxide dismutase [Cu-Zn] [Source:UniProtKB/TrEMBL;Acc:Q1HRN3]			GO:0004784,GO:0006801,GO:0016209,GO:0016491,GO:0019430,GO:0046872,GO:0055114,GO:0098869	superoxide dismutase activity,superoxide metabolic process,antioxidant activity,oxidoreductase activity,removal of superoxide radicals,metal ion binding,oxidation-reduction process,cellular oxidant detoxification
LOC110678878	15022.4	-4.43675	0.177027	-25.0626	1.27293e-138	3.09555e-135	AAEL025839
LOC5569025	7624.17	-4.12586	0.179675	-22.9628	1.09698e-116	2.28658e-113	AAEL007314
LOC5570832	2397.52	2.54349	0.11198	22.7138	3.27184e-114	5.96742e-111	AAEL008595	Protein maelstrom homolog [Source:UniProtKB/Swiss-Prot;Acc:Q16YA8]	mael		GO:0003677,GO:0005634,GO:0005737,GO:0007275,GO:0030154,GO:0031047,GO:0051321,GO:0060964	DNA binding,nucleus,cytoplasm,multicellular organism development,cell differentiation,gene silencing by RNA,meiotic cell cycle,regulation of gene silencing by miRNA
LOC5577491	6465.03	-1.89267	0.083386	-22.6977	4.7195e-114	7.65135e-111	AAEL013227	PIWI [Source:VB Community Annotation]	PIWI6		GO:0003676,GO:0005515,GO:0031047	nucleic acid binding,protein binding,gene silencing by RNA
LOC5567714	2251.03	-4.20608	0.185489	-22.6756	7.80044e-114	1.13816e-110	AAEL006287	PIWI [Source:VB Community Annotation]	PIWI7		GO:0003676,GO:0005515,GO:0031047	nucleic acid binding,protein binding,gene silencing by RNA
LOC5572044	599.454	-3.92156	0.173547	-22.5965	4.68684e-113	6.13089e-110	AAEL000256	Class B Scavenger Receptor (CD36 domain). [Source:VB Community Annotation]	SCRB9		GO:0005886,GO:0016020,GO:0016021	plasma membrane,membrane,integral component of membrane
LOC5568403	12556.7	2.46864	0.109264	22.5933	5.0422e-113	6.13089e-110	AAEL006820	lipid storage droplets surface binding protein 2 (lsd2) [Source:VB Community Annotation]
LOC5568548	550.596	-4.90267	0.21704	-22.5888	5.58241e-113	6.26561e-110	AAEL006957	GPCR Orphan/Putative Class B Family [Source:VB Community Annotation]	GPRNNB4		GO:0004888,GO:0004930,GO:0005515,GO:0007166,GO:0007186,GO:0016020,GO:0016021	transmembrane signaling receptor activity,G protein-coupled receptor activity,protein binding,cell surface receptor signaling pathway,G protein-coupled receptor signaling pathway,membrane,integral component of membrane
LOC5576188	1069.3	-3.58823	0.159224	-22.5358	1.85157e-112	1.92973e-109	AAEL012383	protein serine/threonine kinase, putative [Source:VB Community Annotation]			GO:0016301,GO:0016310	kinase activity,phosphorylation
LOC5576737	1976.32	2.30995	0.104333	22.1402	1.29579e-108	1.26045e-105	AAEL002978	leucyl aminopeptidase, putative [Source:VB Community Annotation]			GO:0004177,GO:0005737,GO:0006508,GO:0008233,GO:0008235,GO:0016787,GO:0019538,GO:0030145,GO:0070006	aminopeptidase activity,cytoplasm,proteolysis,peptidase activity,metalloexopeptidase activity,hydrolase activity,protein metabolic process,manganese ion binding,metalloaminopeptidase activity
LOC5563985	3708.3	-3.86733	0.178171	-21.7058	1.81033e-104	1.65091e-101	AAEL004021	Glucose dehydrogenase [Source:UniProtKB/TrEMBL;Acc:A0A1S4F6C5]			GO:0016614,GO:0050660,GO:0055114	oxidoreductase activity, acting on CH-OH group of donors,flavin adenine dinucleotide binding,oxidation-reduction process
LOC110681235	1677.52	-2.14341	0.0988956	-21.6735	3.65268e-104	3.13507e-101	AAEL025170				GO:0004014,GO:0006597,GO:0008295	adenosylmethionine decarboxylase activity,spermine biosynthetic process,spermidine biosynthetic process
LOC5575317	2575.8	-3.06276	0.143952	-21.2762	1.88493e-100	1.52795e-97	AAEL002607				GO:0005515	protein binding
LOC110674122	1649.67	2.78582	0.133936	20.7997	4.35579e-96	3.34502e-93	AAEL027536	Putative alpha amylase catalytic domain family found in maltase [Source:UniProtKB/TrEMBL;Acc:A0A0P6IY06]			GO:0016020,GO:0016021	membrane,integral component of membrane
LOC23687865	485.766	-5.41089	0.26126	-20.7107	2.77265e-95	2.02279e-92	AAEL017445				GO:0000981,GO:0003677,GO:0003700,GO:0005634,GO:0006355,GO:0006357,GO:0043565	DNA-binding transcription factor activity, RNA polymerase II-specific,DNA binding,DNA-binding transcription factor activity,nucleus,regulation of transcription, DNA-templated,regulation of transcription by RNA polymerase II,sequence-specific DNA binding
LOC5569820	386.432	-5.80516	0.285623	-20.3246	7.79898e-92	5.4188e-89	AAEL001320	cytochrome P450 [Source:VB Community Annotation]	CYP9M4		GO:0004497,GO:0005506,GO:0016020,GO:0016021,GO:0016491,GO:0016705,GO:0020037,GO:0046872,GO:0055114	monooxygenase activity,iron ion binding,membrane,integral component of membrane,oxidoreductase activity,oxidoreductase activity, acting on paired donors, with incorporation or reduction of molecular oxygen,heme binding,metal ion binding,oxidation-reduction process
LOC5566573	680.303	-4.96616	0.2447	-20.2949	1.42586e-91	9.45669e-89	AAEL005491	ABC transporter [Source:VB Community Annotation]			GO:0000166,GO:0005524,GO:0016020,GO:0016021,GO:0016887,GO:0043190,GO:0055085	nucleotide binding,ATP binding,membrane,integral component of membrane,ATPase activity,ATP-binding cassette (ABC) transporter complex,transmembrane transport
LOC5580187	1644.68	2.91264	0.144144	20.2064	8.60302e-91	5.45768e-88	AAEL002554	anosmin, putative [Source:VB Community Annotation]			GO:0005515,GO:0005576,GO:0010466,GO:0030414	protein binding,extracellular region,negative regulation of peptidase activity,peptidase inhibitor activity
LOC5564692	1314.53	-2.30953	0.115107	-20.0643	1.51494e-89	9.2102e-87	AAEL004392	IAP-antagonist Michelob_x-like Protein [Source:VB Community Annotation]	IMP
LOC5567255	3780.36	-2.86543	0.143438	-19.9768	8.77236e-89	5.1199e-86	AAEL005929	ATP-binding cassette transporter [Source:VB Community Annotation]			GO:0000166,GO:0005524,GO:0016020,GO:0016021,GO:0016887,GO:0042626,GO:0055085	nucleotide binding,ATP binding,membrane,integral component of membrane,ATPase activity,ATPase-coupled transmembrane transporter activity,transmembrane transport
LOC110678272	584.452	-6.97391	0.353314	-19.7385	1.00668e-86	5.64938e-84	AAEL021263
LOC5574190	7366.08	-1.79712	0.0911194	-19.7227	1.37768e-86	7.44509e-84	AAEL002308	butyrate response factor 1 (TIS11B protein) [Source:VB Community Annotation]			GO:0046872	metal ion binding
LOC5573284	481.099	-4.22707	0.214476	-19.7088	1.8126e-86	9.4456e-84	AAEL010386	glucosyl/glucuronosyl transferases [Source:VB Community Annotation]			GO:0008194,GO:0015020,GO:0016020,GO:0016021,GO:0016740,GO:0016757,GO:0016758	UDP-glycosyltransferase activity,glucuronosyltransferase activity,membrane,integral component of membrane,transferase activity,transferase activity, transferring glycosyl groups,transferase activity, transferring hexosyl groups
LOC5573003	2450.26	-2.15384	0.110192	-19.5461	4.44866e-85	2.23829e-82	AAEL001922
LOC5568380	931.065	-3.88791	0.20192	-19.2548	1.28738e-82	6.26137e-80	AAEL019704				GO:0004888,GO:0005515,GO:0007166,GO:0016020,GO:0016021	transmembrane signaling receptor activity,protein binding,cell surface receptor signaling pathway,membrane,integral component of membrane
LOC5572884	9054.12	-4.26083	0.221546	-19.2322	1.98975e-82	9.36532e-80	AAEL013506	fibrinogen and fibronectin [Source:VB Community Annotation]
LOC5565429	512.689	-4.65925	0.245147	-19.006	1.52127e-80	6.93654e-78	AAEL000671	Toll-like receptor (TOLL6) [Source:VB Community Annotation]	TOLL6		GO:0005515,GO:0007165,GO:0016020,GO:0016021	protein binding,signal transduction,membrane,integral component of membrane
LOC5566023	1302.43	2.74171	0.144722	18.9447	4.88118e-80	2.15822e-77	AAEL019551
LOC5574665	5713.82	-2.06923	0.110109	-18.7927	8.67163e-79	3.72141e-76	AAEL011309	orotidine-5'-phosphate decarboxylase, putative [Source:VB Community Annotation]			GO:0003824,GO:0004588,GO:0004590,GO:0006207,GO:0006221,GO:0008152,GO:0009116,GO:0016740,GO:0016757,GO:0016829,GO:0016831,GO:0044205	catalytic activity,orotate phosphoribosyltransferase activity,orotidine-5'-phosphate decarboxylase activity,'de novo' pyrimidine nucleobase biosynthetic process,pyrimidine nucleotide biosynthetic process,metabolic process,nucleoside metabolic process,transferase activity,transferase activity, transferring glycosyl groups,lyase activity,carboxy-lyase activity,'de novo' UMP biosynthetic process
LOC5578354	808.906	3.0409	0.162222	18.7453	2.11491e-78	8.81677e-76	AAEL003508	serine-pyruvate aminotransferase [Source:VB Community Annotation]			GO:0003824,GO:0004760,GO:0008453	catalytic activity,serine-pyruvate transaminase activity,alanine-glyoxylate transaminase activity
LOC5565099	571.512	-3.22874	0.172539	-18.7131	3.87381e-78	1.57008e-75	AAEL004590
LOC5576841	4753.57	2.04662	0.109778	18.6432	1.4339e-77	5.6546e-75	AAEL012827	endoplasmin [Source:VB Community Annotation]			GO:0000166,GO:0005524,GO:0006457,GO:0051082	nucleotide binding,ATP binding,protein folding,unfolded protein binding
LOC110681080	542.301	-3.22881	0.174347	-18.5195	1.43778e-76	5.52069e-74	AAEL023310				GO:0005515	protein binding
LOC5565301	1452.98	-2.86875	0.155319	-18.47	3.60095e-76	1.34722e-73	AAEL004715	b-cell translocation protein [Source:VB Community Annotation]
LOC5571169	2560.3	-4.05004	0.219834	-18.4232	8.55816e-76	3.1218e-73	AAEL008856
LOC5564694	770.552	2.84047	0.155117	18.3117	6.67296e-75	2.37476e-72	AAEL026038				GO:0004601,GO:0006979,GO:0020037,GO:0048477,GO:0055114,GO:0098869	peroxidase activity,response to oxidative stress,heme binding,oogenesis,oxidation-reduction process,cellular oxidant detoxification
LOC5570700	610.8	-3.37357	0.185142	-18.2216	3.48039e-74	1.20911e-71	AAEL020264				GO:0005515,GO:0016020,GO:0016021	protein binding,membrane,integral component of membrane
LOC5566688	8414.09	-3.05504	0.167922	-18.1932	5.83903e-74	1.98133e-71	AAEL005588
LOC5564514	370.914	3.34962	0.185718	18.036	1.01632e-72	3.37027e-70	AAEL004292				GO:0042302	structural constituent of cuticle
LOC110677012	1205.21	-5.1906	0.289477	-17.931	6.75581e-72	2.19053e-69	AAEL021281
LOC5570814	2062.54	2.62589	0.146589	17.9132	9.29494e-72	2.94832e-69	AAEL008580				GO:0046872	metal ion binding
LOC110674120	557.8	-7.02872	0.396933	-17.7076	3.66538e-70	1.13791e-67	AAEL024267
LOC5565883	3898.22	3.08479	0.174393	17.6888	5.11883e-70	1.55602e-67	AAEL019474				GO:0003676,GO:0003723	nucleic acid binding,RNA binding
LOC5575967	3533.34	3.50465	0.199072	17.605	2.25543e-69	6.7161e-67	AAEL012217	protease m1 zinc metalloprotease [Source:VB Community Annotation]			GO:0004177,GO:0006508,GO:0008233,GO:0008237,GO:0008270,GO:0016787,GO:0046872	aminopeptidase activity,proteolysis,peptidase activity,metallopeptidase activity,zinc ion binding,hydrolase activity,metal ion binding
LOC5580033	1093.8	3.39476	0.193127	17.5779	3.64022e-69	1.06229e-66	AAEL010229				GO:0016020,GO:0016021	membrane,integral component of membrane
LOC110675520	1175.7	4.90613	0.283876	17.2827	6.3515e-67	1.81715e-64	AAEL024417
LOC5568297	2166.73	3.0768	0.178824	17.2058	2.40266e-66	6.74176e-64	AAEL006726	Innexin [Source:UniProtKB/TrEMBL;Acc:Q174Z8]	inx4		GO:0005886,GO:0005921,GO:0006811,GO:0016020,GO:0016021,GO:0030054	plasma membrane,gap junction,ion transport,membrane,integral component of membrane,cell junction
LOC5576633	470.114	2.78804	0.162521	17.155	5.77151e-66	1.58891e-63	AAEL012659	protein serine/threonine kinase, putative [Source:VB Community Annotation]			GO:0004672,GO:0005524,GO:0006468	protein kinase activity,ATP binding,protein phosphorylation
LOC5571580	594.529	-3.00675	0.175605	-17.1222	1.01364e-65	2.73888e-63	AAEL009167	bone morphogenetic protein 5/7, bmp5/7 [Source:VB Community Annotation]			GO:0005576,GO:0007165,GO:0008083	extracellular region,signal transduction,growth factor activity
LOC5574112	1969.18	2.85111	0.167078	17.0645	2.72626e-65	7.23251e-63	AAEL002261	GTP cyclohydrolase i [Source:VB Community Annotation]			GO:0003824,GO:0003934,GO:0005737,GO:0006729,GO:0008152,GO:0016787,GO:0035998,GO:0046654	catalytic activity,GTP cyclohydrolase I activity,cytoplasm,tetrahydrobiopterin biosynthetic process,metabolic process,hydrolase activity,7,8-dihydroneopterin 3'-triphosphate biosynthetic process,tetrahydrofolate biosynthetic process
LOC5578527	7274.74	-1.81031	0.106201	-17.046	3.74306e-65	9.75268e-63	AAEL013733	Protein distal antenna [Source:VB Community Annotation]			GO:0003677,GO:0003700,GO:0005634,GO:0006355,GO:0007275,GO:0007379,GO:0007469,GO:0048749	DNA binding,DNA-binding transcription factor activity,nucleus,regulation of transcription, DNA-templated,multicellular organism development,segment specification,antennal development,compound eye development
LOC5569173	399.985	-5.25637	0.309386	-16.9897	9.78936e-65	2.50591e-62	AAEL023026
LOC5573035	2009.05	-4.08992	0.241096	-16.9639	1.52013e-64	3.82418e-62	AAEL023745				GO:0005509,GO:0005515,GO:0005634,GO:0005886,GO:0007219,GO:0007275,GO:0016020,GO:0016021,GO:0030154,GO:0050793	calcium ion binding,protein binding,nucleus,plasma membrane,Notch signaling pathway,multicellular organism development,membrane,integral component of membrane,cell differentiation,regulation of developmental process
LOC110676303	84956.5	-4.02884	0.23799	-16.9286	2.76961e-64	6.84939e-62	AAEL027632
LOC5570740	1146.54	-3.21188	0.190031	-16.9019	4.35912e-64	1.06007e-61	AAEL025518				GO:0005576,GO:0008061	extracellular region,chitin binding
LOC5571621	364.329	-4.31799	0.255574	-16.8952	4.87808e-64	1.16682e-61	AAEL009199	core 1 UDP-galactose:n-acetylgalactosamine-alpha-r beta 1,3- galactosyltransferase [Source:VB Community Annotation]			GO:0006486,GO:0016020,GO:0016021,GO:0016263,GO:0016266,GO:0016757	protein glycosylation,membrane,integral component of membrane,glycoprotein-N-acetylgalactosamine 3-beta-galactosyltransferase activity,O-glycan processing,transferase activity, transferring glycosyl groups
LOC5568749	32314	4.1114	0.243749	16.8674	7.81992e-64	1.84033e-61	AAEL007097	4-nitrophenylphosphatase [Source:UniProtKB/TrEMBL;Acc:Q0IF18]			GO:0016787	hydrolase activity
LOC5574077	353.388	3.28985	0.195804	16.8018	2.36769e-63	5.48365e-61	AAEL021209				GO:0005515,GO:0010997,GO:0097027,GO:1904668	protein binding,anaphase-promoting complex binding,ubiquitin-protein transferase activator activity,positive regulation of ubiquitin protein ligase activity
LOC23687599	1300.67	3.64438	0.217089	16.7875	3.01344e-63	6.87016e-61	AAEL017179				GO:0055114	oxidation-reduction process
LOC5576838	2542.88	-1.50418	0.0896666	-16.7752	3.70567e-63	8.31837e-61	AAEL012826	replication factor a 1, rfa1 [Source:VB Community Annotation]			GO:0003676,GO:0003677,GO:0005634,GO:0006260,GO:0006281,GO:0006310,GO:0046872	nucleic acid binding,DNA binding,nucleus,DNA replication,DNA repair,DNA recombination,metal ion binding
LOC5571135	701.815	3.00081	0.179336	16.7329	7.54841e-63	1.66877e-60	AAEL008829
LOC110675408	1998.73	-1.81234	0.108583	-16.6909	1.52681e-62	3.32502e-60	AAEL025591				GO:0000166,GO:0005524,GO:0005737,GO:0017112,GO:0055037	nucleotide binding,ATP binding,cytoplasm,Rab guanyl-nucleotide exchange factor activity,recycling endosome
LOC5564117	9343.65	3.0696	0.18425	16.66	2.56165e-62	5.49663e-60	AAEL019408	2-Cys thioredoxin peroxidase [Source:UniProtKB/TrEMBL;Acc:Q8WSF6]			GO:0004601,GO:0005623,GO:0016209,GO:0016491,GO:0045454,GO:0051920,GO:0055114,GO:0098869	peroxidase activity,obsolete cell,antioxidant activity,oxidoreductase activity,cell redox homeostasis,peroxiredoxin activity,oxidation-reduction process,cellular oxidant detoxification
LOC5564603	4855.97	-1.46826	0.0881612	-16.6543	2.81741e-62	5.9578e-60	AAEL010086	DNA replication licensing factor MCM4 [Source:VB Community Annotation]			GO:0000166,GO:0003677,GO:0003678,GO:0004386,GO:0005524,GO:0005634,GO:0006260,GO:0006270,GO:0016787,GO:0032508,GO:0042555	nucleotide binding,DNA binding,DNA helicase activity,helicase activity,ATP binding,nucleus,DNA replication,DNA replication initiation,hydrolase activity,DNA duplex unwinding,MCM complex
LOC5578333	926.605	-2.96045	0.177776	-16.6527	2.89257e-62	6.02282e-60	AAEL003532				GO:0007275,GO:0009966,GO:0016020	multicellular organism development,regulation of signal transduction,membrane
LOC5578266	2167.58	-3.23605	0.194335	-16.6519	2.93071e-62	6.02282e-60	AAEL003505	jun [Source:VB Community Annotation]			GO:0003677,GO:0003700,GO:0005634,GO:0006355,GO:0006357	DNA binding,DNA-binding transcription factor activity,nucleus,regulation of transcription, DNA-templated,regulation of transcription by RNA polymerase II
LOC5576873	205.428	4.63619	0.27916	16.6077	6.13448e-62	1.24317e-59	AAEL003041				GO:0042302	structural constituent of cuticle
LOC5579828	668.819	-3.56904	0.215007	-16.5997	7.00673e-62	1.40048e-59	AAEL019688				GO:0003824,GO:0004497,GO:0004500,GO:0005507,GO:0016715,GO:0046872,GO:0055114	catalytic activity,monooxygenase activity,dopamine beta-monooxygenase activity,copper ion binding,oxidoreductase activity, acting on paired donors, with incorporation or reduction of molecular oxygen, reduced ascorbate as one donor, and incorporation of one atom of oxygen,metal ion binding,oxidation-reduction process
LOC5571152	672.119	2.28458	0.137678	16.5936	7.74697e-62	1.52751e-59	AAEL008843				GO:0046872	metal ion binding
LOC5569638	1108.72	2.80089	0.169142	16.5594	1.37017e-61	2.66563e-59	AAEL007783	centromere protein-A, putative [Source:VB Community Annotation]			GO:0000786,GO:0003677,GO:0046982	nucleosome,DNA binding,protein heterodimerization activity
LOC5571230	1397.87	3.071	0.185603	16.5461	1.70865e-61	3.28038e-59	AAEL019485				GO:0004721,GO:0005516,GO:0006470,GO:0016787,GO:0033192,GO:0097720	phosphoprotein phosphatase activity,calmodulin binding,protein dephosphorylation,hydrolase activity,calmodulin-dependent protein phosphatase activity,calcineurin-mediated signaling
LOC5572180	5114.33	-4.33105	0.263831	-16.416	1.46975e-60	2.78508e-58	AAEL009591	cytochrome P450 [Source:VB Community Annotation]	CYP9M8		GO:0004497,GO:0005506,GO:0016491,GO:0016705,GO:0020037,GO:0046872,GO:0055114	monooxygenase activity,iron ion binding,oxidoreductase activity,oxidoreductase activity, acting on paired donors, with incorporation or reduction of molecular oxygen,heme binding,metal ion binding,oxidation-reduction process
LOC5569999	3159.08	-1.70061	0.103867	-16.3729	2.98735e-60	5.58825e-58	AAEL000181	polybromo-1 [Source:VB Community Annotation]			GO:0003677,GO:0003682,GO:0005515,GO:0005634,GO:0006338,GO:0016586	DNA binding,chromatin binding,protein binding,nucleus,chromatin remodeling,RSC-type complex
LOC5579032	2490.5	-4.1603	0.254543	-16.3442	4.78318e-60	8.83435e-58	AAEL013969				GO:0007411,GO:0016020,GO:0016021	axon guidance,membrane,integral component of membrane
LOC5567864	439.646	-4.57117	0.279775	-16.3387	5.23155e-60	9.5417e-58	AAEL006310				GO:0016020,GO:0016021	membrane,integral component of membrane
LOC5572848	1943.76	-3.13406	0.19241	-16.2884	1.19311e-59	2.14922e-57	AAEL010068
LOC5564679	7290.46	3.62722	0.223184	16.2521	2.15753e-59	3.83909e-57	AAEL004390	heme peroxidase [Source:VB Community Annotation]	HPX8B		GO:0004601,GO:0006979,GO:0020037,GO:0048477,GO:0055114,GO:0098869	peroxidase activity,response to oxidative stress,heme binding,oogenesis,oxidation-reduction process,cellular oxidant detoxification
LOC5578405	520.322	3.22604	0.19872	16.2341	2.89304e-59	5.08582e-57	AAEL013692	PIWI [Source:VB Community Annotation]	PIWI3		GO:0003676,GO:0005515,GO:0031047	nucleic acid binding,protein binding,gene silencing by RNA
LOC5572011	1427.85	-2.60802	0.160763	-16.2228	3.47931e-59	6.04365e-57	AAEL021276				GO:0016020,GO:0016021	membrane,integral component of membrane
LOC5571920	657.298	2.80487	0.173179	16.1963	5.35538e-59	9.19298e-57	AAEL009411	DNA-binding protein smubp-2 [Source:VB Community Annotation]			GO:0003676,GO:0003723,GO:0003724,GO:0004386,GO:0005737,GO:0032574,GO:0035194	nucleic acid binding,RNA binding,RNA helicase activity,helicase activity,cytoplasm,5'-3' RNA helicase activity,post-transcriptional gene silencing by RNA
LOC5577588	740.202	2.97827	0.184074	16.1798	7.00702e-59	1.18883e-56	AAEL013295				GO:0005768,GO:0005770,GO:0016020,GO:0016021	endosome,late endosome,membrane,integral component of membrane
LOC5580130	757.877	-2.50403	0.154883	-16.1673	8.57962e-59	1.43891e-56	AAEL002451	zinc finger protein [Source:VB Community Annotation]			GO:0000981,GO:0003676,GO:0003677,GO:0005634,GO:0006355,GO:0006357,GO:0043565	DNA-binding transcription factor activity, RNA polymerase II-specific,nucleic acid binding,DNA binding,nucleus,regulation of transcription, DNA-templated,regulation of transcription by RNA polymerase II,sequence-specific DNA binding
LOC5569904	3524.62	-2.62949	0.163374	-16.0949	2.77152e-58	4.59537e-56	AAEL007997
LOC5570231	1447.09	3.69516	0.229663	16.0895	3.02156e-58	4.95367e-56	AAEL008182				GO:0005515	protein binding
LOC5565030	433.389	-2.89252	0.180152	-16.056	5.18683e-58	8.40901e-56	AAEL026380				GO:0000287,GO:0003824,GO:0030976	magnesium ion binding,catalytic activity,thiamine pyrophosphate binding
LOC5569050	620.746	-2.99854	0.186908	-16.0428	6.41814e-58	1.02909e-55	AAEL007349				GO:0005765,GO:0010008,GO:0016020,GO:0016021,GO:0046872	lysosomal membrane,endosome membrane,membrane,integral component of membrane,metal ion binding
LOC5564122	1059.61	3.05269	0.190998	15.9829	1.6827e-57	2.66872e-55	AAEL004104				GO:0005515	protein binding
LOC5564976	650.845	2.45771	0.153946	15.9647	2.25056e-57	3.53095e-55	AAEL004532	glyoxylate/hydroxypyruvate reductase [Source:VB Community Annotation]			GO:0016491,GO:0016616,GO:0051287,GO:0055114	oxidoreductase activity,oxidoreductase activity, acting on the CH-OH group of donors, NAD or NADP as acceptor,NAD binding,oxidation-reduction process
LOC110680352	196.47	-4.49518	0.281639	-15.9608	2.39729e-57	3.72116e-55	AAEL023185
LOC5577714	27083	2.61074	0.163583	15.9597	2.43841e-57	3.74514e-55	AAEL013338	lethal(2)essential for life protein, l2efl [Source:VB Community Annotation]			GO:0046872	metal ion binding
LOC5565499	823.331	2.28274	0.143624	15.8939	6.98623e-57	1.06183e-54	AAEL004805	potassium-dependent sodium-calcium exchanger, putative [Source:VB Community Annotation]			GO:0006816,GO:0015297,GO:0016020,GO:0016021,GO:0055085	calcium ion transport,antiporter activity,membrane,integral component of membrane,transmembrane transport
LOC110680424	260.327	-5.92464	0.374411	-15.8239	2.12962e-56	3.20343e-54	AAEL026213
LOC110677691	722.685	-2.66902	0.169435	-15.7524	6.60721e-56	9.83733e-54	AAEL019908				GO:0003677,GO:0005634,GO:0008270,GO:0046872	DNA binding,nucleus,zinc ion binding,metal ion binding
LOC5567181	3106.2	2.94495	0.187215	15.7303	9.37366e-56	1.38153e-53	AAEL000923
LOC5578729	1727.66	3.08339	0.196633	15.6809	2.04189e-55	2.97932e-53	AAEL013844	diazepam binding inhibitor, putative [Source:VB Community Annotation]			GO:0000062	fatty-acyl-CoA binding
LOC5567287	1341.02	1.9001	0.121317	15.6623	2.73929e-55	3.95733e-53	AAEL005951	lipid storage droplets surface binding protein [Source:VB Community Annotation]
LOC5569794	2102.98	-2.89561	0.185617	-15.5999	7.28644e-55	1.04232e-52	AAEL001299				GO:0016021	integral component of membrane
LOC5574373	842.895	-2.00374	0.128654	-15.5746	1.08343e-54	1.5348e-52	AAEL011103	centromere/kinetochore protein zw10 [Source:VB Community Annotation]			GO:0000278,GO:0000775,GO:0000776,GO:0000777,GO:0005634,GO:0005694,GO:0005737,GO:0007049,GO:0051301	mitotic cell cycle,chromosome, centromeric region,kinetochore,condensed chromosome kinetochore,nucleus,chromosome,cytoplasm,cell cycle,cell division
LOC5564266	1784.76	2.43602	0.156845	15.5314	2.12737e-54	2.98466e-52	AAEL014365	chromaffin granule amine transporter, putative [Source:VB Community Annotation]			GO:0016020,GO:0016021,GO:0022857,GO:0055085	membrane,integral component of membrane,transmembrane transporter activity,transmembrane transport
LOC5572877	585.856	2.29556	0.14824	15.4854	4.35065e-54	6.04574e-52	AAEL010109				GO:0016020,GO:0016021	membrane,integral component of membrane
LOC23687875	38859.1	-1.33356	0.0863391	-15.4456	8.07409e-54	1.11141e-51	AAEL017455
LOC5570576	1985.25	-1.80531	0.116946	-15.4371	9.21808e-54	1.25702e-51	AAEL008377
LOC5564745	2056.58	-2.31588	0.150064	-15.4326	9.87409e-54	1.33401e-51	AAEL014600	4-hydroxyphenylpyruvate dioxygenase [Source:VB Community Annotation]			GO:0003868,GO:0009072,GO:0016701,GO:0046872,GO:0055114	4-hydroxyphenylpyruvate dioxygenase activity,aromatic amino acid family metabolic process,oxidoreductase activity, acting on single donors with incorporation of molecular oxygen,metal ion binding,oxidation-reduction process
LOC5565921	4021.73	2.50455	0.162608	15.4024	1.57781e-53	2.11209e-51	AAEL000703	glycogen phosphorylase [Source:VB Community Annotation]			GO:0004645,GO:0005975,GO:0005977,GO:0008184,GO:0016740,GO:0016757,GO:0030170,GO:0102250,GO:0102499	1,4-alpha-oligoglucan phosphorylase activity,carbohydrate metabolic process,glycogen metabolic process,glycogen phosphorylase activity,transferase activity,transferase activity, transferring glycosyl groups,pyridoxal phosphate binding,linear malto-oligosaccharide phosphorylase activity,SHG alpha-glucan phosphorylase activity
LOC5576532	1813.04	2.73043	0.177369	15.3941	1.79246e-53	2.37762e-51	AAEL012579	Aspartate aminotransferase [Source:UniProtKB/TrEMBL;Acc:Q16LN3]			GO:0003824,GO:0004069,GO:0006520,GO:0008483,GO:0009058,GO:0016740,GO:0030170	catalytic activity,L-aspartate:2-oxoglutarate aminotransferase activity,cellular amino acid metabolic process,transaminase activity,biosynthetic process,transferase activity,pyridoxal phosphate binding
LOC5566292	1400.99	2.87543	0.186999	15.3767	2.34622e-53	3.08412e-51	AAEL000739				GO:0005515	protein binding
LOC5574496	2056.57	2.64693	0.172159	15.3749	2.41264e-53	3.14311e-51	AAEL002399	Aspartate aminotransferase [Source:UniProtKB/TrEMBL;Acc:Q5K6H3]			GO:0003824,GO:0004069,GO:0006520,GO:0008483,GO:0009058,GO:0016740,GO:0030170	catalytic activity,L-aspartate:2-oxoglutarate aminotransferase activity,cellular amino acid metabolic process,transaminase activity,biosynthetic process,transferase activity,pyridoxal phosphate binding
LOC5575331	570.33	2.7861	0.181536	15.3474	3.68937e-53	4.76386e-51	AAEL002586
LOC5566358	4253.16	1.90093	0.123971	15.3337	4.55558e-53	5.83074e-51	AAEL005312				GO:0005515	protein binding
LOC5574198	363.197	2.82991	0.184741	15.3183	5.77506e-53	7.32729e-51	AAEL002281				GO:0005634,GO:0008270,GO:0046872	nucleus,zinc ion binding,metal ion binding
LOC5577684	669.971	2.57704	0.168428	15.3006	7.58059e-53	9.5352e-51	AAEL019721				GO:0005509	calcium ion binding
LOC5574559	6938.48	-3.11088	0.203684	-15.2731	1.15549e-52	1.441e-50	AAEL011234	reticulon/nogo receptor [Source:VB Community Annotation]			GO:0005515,GO:0016020,GO:0016021	protein binding,membrane,integral component of membrane
LOC5579646	624.501	-3.15048	0.207077	-15.2141	2.85191e-52	3.52646e-50	AAEL003978				GO:0003676	nucleic acid binding
LOC110674034	2808.68	-2.77718	0.182884	-15.1854	4.4167e-52	5.41547e-50	AAEL025611
LOC5565532	905.726	2.597	0.171122	15.1763	5.0763e-52	6.17236e-50	AAEL027319				GO:0005515	protein binding
LOC5571662	2075.66	-1.50812	0.0995475	-15.1498	7.60124e-52	9.16609e-50	AAEL001655	structural maintenance of chromosomes 4 smc4 [Source:VB Community Annotation]			GO:0005515,GO:0005524,GO:0005634,GO:0005694,GO:0051276	protein binding,ATP binding,nucleus,chromosome,chromosome organization
LOC5578018	1026.9	2.68236	0.17725	15.1332	9.78016e-52	1.16969e-49	AAEL003382	Ro ribonucleoprotein autoantigen, putative [Source:VB Community Annotation]			GO:0003723,GO:0005737	RNA binding,cytoplasm
LOC5564923	429.403	2.1124	0.139754	15.1152	1.28671e-51	1.52637e-49	AAEL004496	glutamate transporter [Source:VB Community Annotation]			GO:0015293,GO:0016020,GO:0016021,GO:0055085	symporter activity,membrane,integral component of membrane,transmembrane transport
LOC110676462	1615.64	-1.83451	0.121416	-15.1093	1.4057e-51	1.65408e-49	AAEL019778
LOC5568896	2220.49	-2.82621	0.187234	-15.0945	1.75946e-51	2.05378e-49	AAEL007218				GO:0006629,GO:0016020,GO:0016021,GO:0016491,GO:0055114,GO:0080019,GO:0102965	lipid metabolic process,membrane,integral component of membrane,oxidoreductase activity,oxidation-reduction process,fatty-acyl-CoA reductase (alcohol-forming) activity,alcohol-forming fatty acyl-CoA reductase activity
LOC5579146	818.137	-2.26601	0.150611	-15.0455	3.6965e-51	4.2806e-49	AAEL014022				GO:0005515	protein binding
LOC23687419	603.109	2.08281	0.138559	15.032	4.53417e-51	5.2093e-49	AAEL016999	white protein; eye pigment transporter [Source:VB Community Annotation]	white		GO:0000166,GO:0005524,GO:0016020,GO:0016021,GO:0016887,GO:0031409,GO:0042626,GO:0055085	nucleotide binding,ATP binding,membrane,integral component of membrane,ATPase activity,pigment binding,ATPase-coupled transmembrane transporter activity,transmembrane transport
LOC5580315	2364.29	1.5339	0.102163	15.0142	5.92353e-51	6.74757e-49	AAEL012897	aconitase, mitochondrial [Source:VB Community Annotation]			GO:0003994,GO:0005739,GO:0006099,GO:0016829,GO:0046872,GO:0047780,GO:0051536,GO:0051539	aconitate hydratase activity,mitochondrion,tricarboxylic acid cycle,lyase activity,metal ion binding,citrate dehydratase activity,iron-sulfur cluster binding,4 iron, 4 sulfur cluster binding
LOC5575445	5554.47	2.86202	0.190626	15.0138	5.96557e-51	6.74757e-49	AAEL002652
LOC5573541	474.322	3.20144	0.214297	14.9393	1.82961e-50	2.05353e-48	AAEL010583	ubiquitin conjugating enzyme 7 interacting protein [Source:VB Community Annotation]			GO:0046872	metal ion binding
LOC5564713	44917.4	1.50006	0.10061	14.9097	2.84975e-50	3.1741e-48	AAEL014583	60S acidic ribosomal protein P2 [Source:UniProtKB/TrEMBL;Acc:Q1HRM9]	RpLP2		GO:0003735,GO:0005840,GO:0006414	structural constituent of ribosome,ribosome,translational elongation
LOC5569526	824.972	2.22144	0.149249	14.8841	4.18106e-50	4.62166e-48	AAEL007696	TOLL pathway signalling NF-kappaB Relish-like transcription factor [Source:VB Community Annotation]	REL1A		GO:0002218,GO:0003677,GO:0003700,GO:0005634,GO:0005737,GO:0006355,GO:0006357,GO:0042025	activation of innate immune response,DNA binding,DNA-binding transcription factor activity,nucleus,cytoplasm,regulation of transcription, DNA-templated,regulation of transcription by RNA polymerase II,host cell nucleus
LOC110676920	426.754	-2.85148	0.191719	-14.8733	4.91552e-50	5.39266e-48	AAEL018041				GO:0008194,GO:0016020,GO:0016021,GO:0016740,GO:0016757,GO:0016758	UDP-glycosyltransferase activity,membrane,integral component of membrane,transferase activity,transferase activity, transferring glycosyl groups,transferase activity, transferring hexosyl groups
LOC5577039	369.596	2.55493	0.172744	14.7903	1.69118e-49	1.8415e-47	AAEL012955	phosphatidylethanolamine-binding protein [Source:VB Community Annotation]
LOC5569028	571.361	-2.21975	0.150467	-14.7524	2.96713e-49	3.20691e-47	AAEL007316				GO:0046872	metal ion binding
LOC5569266	259.61	-3.83508	0.260455	-14.7245	4.485e-49	4.81181e-47	AAEL018141				GO:0006629,GO:0006633,GO:0016020,GO:0016021,GO:0016491,GO:0016717,GO:0055114	lipid metabolic process,fatty acid biosynthetic process,membrane,integral component of membrane,oxidoreductase activity,oxidoreductase activity, acting on paired donors, with oxidation of a pair of donors resulting in the reduction of molecular oxygen to two molecules of water,oxidation-reduction process
LOC5577613	2093.2	-2.24574	0.152666	-14.7102	5.54825e-49	5.90909e-47	AAEL003246	deoxyribose-phosphate aldolase [Source:VB Community Annotation]			GO:0003824,GO:0004139,GO:0005737,GO:0009264,GO:0016829,GO:0046386	catalytic activity,deoxyribose-phosphate aldolase activity,cytoplasm,deoxyribonucleotide catabolic process,lyase activity,deoxyribose phosphate catabolic process
LOC5569887	5704.96	-2.19186	0.149131	-14.6975	6.68391e-49	7.06703e-47	AAEL024147				GO:0006629,GO:0006631,GO:0006633,GO:0016020,GO:0016021,GO:0016740,GO:0030176,GO:0102336,GO:0102337,GO:0102338,GO:0102756	lipid metabolic process,fatty acid metabolic process,fatty acid biosynthetic process,membrane,integral component of membrane,transferase activity,integral component of endoplasmic reticulum membrane,3-oxo-arachidoyl-CoA synthase activity,3-oxo-cerotoyl-CoA synthase activity,3-oxo-lignoceronyl-CoA synthase activity,very-long-chain 3-ketoacyl-CoA synthase activity
LOC110676831	23400.8	1.34517	0.0917565	14.6602	1.15856e-48	1.21616e-46	AAEL025362	60S ribosomal protein L10 [Source:UniProtKB/TrEMBL;Acc:Q1HRT6]
LOC5578856	293.624	-2.93501	0.200313	-14.6521	1.30675e-48	1.36191e-46	AAEL003713	leucine-rich transmembrane protein [Source:VB Community Annotation]			GO:0005515,GO:0016020,GO:0016021	protein binding,membrane,integral component of membrane
LOC5576736	304.934	-3.80134	0.259614	-14.6423	1.50916e-48	1.56171e-46	AAEL021665				GO:0003677,GO:0003700,GO:0005634,GO:0006355,GO:0007275,GO:0043565	DNA binding,DNA-binding transcription factor activity,nucleus,regulation of transcription, DNA-templated,multicellular organism development,sequence-specific DNA binding
LOC5574593	1622.05	2.51324	0.172692	14.5533	5.56332e-48	5.71651e-46	AAEL002422	cytoplasmic polyadenylation element binding protein (cpeb) [Source:VB Community Annotation]			GO:0003676,GO:0003723,GO:0003730,GO:0006417,GO:0045182	nucleic acid binding,RNA binding,mRNA 3'-UTR binding,regulation of translation,translation regulator activity
LOC5566878	584.627	-3.15025	0.216628	-14.5422	6.54781e-48	6.68106e-46	AAEL021073				GO:0005515	protein binding
LOC5565195	1214.83	2.10826	0.145033	14.5364	7.12771e-48	7.22226e-46	AAEL024179				GO:0005347,GO:0005743,GO:0015867,GO:0016020,GO:0016021,GO:0055085	ATP transmembrane transporter activity,mitochondrial inner membrane,ATP transport,membrane,integral component of membrane,transmembrane transport
LOC5571287	316.672	2.73807	0.188451	14.5293	7.8982e-48	7.94777e-46	AAEL001559				GO:0000166,GO:0004672,GO:0004674,GO:0005524,GO:0006468	nucleotide binding,protein kinase activity,protein serine/threonine kinase activity,ATP binding,protein phosphorylation
LOC5570251	290.971	-3.58595	0.247471	-14.4904	1.39308e-47	1.39222e-45	AAEL008205
LOC5577380	1833.89	1.7126	0.118443	14.4592	2.19173e-47	2.17548e-45	AAEL000415	AMP dependent coa ligase [Source:VB Community Annotation]			GO:0003824	catalytic activity
LOC5578315	670.175	-2.39848	0.166107	-14.4394	2.92384e-47	2.88255e-45	AAEL013637	homogentisate 1,2-dioxygenase [Source:VB Community Annotation]			GO:0004411,GO:0006559,GO:0006570,GO:0046872,GO:0055114	homogentisate 1,2-dioxygenase activity,L-phenylalanine catabolic process,tyrosine metabolic process,metal ion binding,oxidation-reduction process
LOC5565437	440.567	2.95602	0.204764	14.4362	3.06216e-47	2.99865e-45	AAEL000661	t-cell specific transcription factor, tcf [Source:VB Community Annotation]			GO:0003677,GO:0005634,GO:0016055	DNA binding,nucleus,Wnt signaling pathway
LOC5578384	3655.27	2.27173	0.157533	14.4207	3.83514e-47	3.73057e-45	AAEL018263
LOC5579923	2337.45	-2.47891	0.172064	-14.4069	4.68271e-47	4.52486e-45	AAEL006808
LOC5569133	664.726	3.11872	0.216985	14.373	7.64742e-47	7.34102e-45	AAEL019707				GO:0016020,GO:0016021	membrane,integral component of membrane
LOC5577626	646.472	2.0934	0.145819	14.3562	9.74772e-47	9.29601e-45	AAEL003210	tetraspanin 29fa [Source:VB Community Annotation]			GO:0016020,GO:0016021	membrane,integral component of membrane
LOC5575506	241.85	3.30878	0.230551	14.3516	1.04063e-46	9.83955e-45	AAEL018228				GO:0016020,GO:0016021,GO:0022857,GO:0055085	membrane,integral component of membrane,transmembrane transporter activity,transmembrane transport
LOC5575114	1125.54	1.8055	0.125807	14.3513	1.04525e-46	9.83955e-45	AAEL011653	thyroid hormone receptor interactor [Source:VB Community Annotation]			GO:0000166,GO:0005524,GO:0016887,GO:0051321	nucleotide binding,ATP binding,ATPase activity,meiotic cell cycle
LOC5569810	2151.23	-3.1281	0.217997	-14.3493	1.07578e-46	1.0062e-44	AAEL001306
LOC5567771	854.534	2.70418	0.188524	14.344	1.16154e-46	1.0795e-44	AAEL027575
LOC5575834	322.708	-3.29426	0.229943	-14.3264	1.49673e-46	1.37465e-44	AAEL012104				GO:0005515	protein binding
LOC110681088	641.868	-1.953	0.136323	-14.3263	1.49797e-46	1.37465e-44	AAEL021891
LOC5563587	838.829	1.95071	0.136176	14.3249	1.52855e-46	1.39394e-44	AAEL000005				GO:0003676,GO:0005634,GO:0008270,GO:0046872	nucleic acid binding,nucleus,zinc ion binding,metal ion binding
LOC5580166	3563.93	2.15254	0.150595	14.2936	2.39767e-46	2.17294e-44	AAEL002542	Triosephosphate isomerase [Source:UniProtKB/TrEMBL;Acc:Q17HW3]	Tpi		GO:0003824,GO:0004807,GO:0006094,GO:0006096,GO:0016853	catalytic activity,triose-phosphate isomerase activity,gluconeogenesis,glycolytic process,isomerase activity
LOC5571658	5561.51	3.61481	0.253269	14.2726	3.24267e-46	2.92061e-44	AAEL001666				GO:0005777,GO:0010468	peroxisome,regulation of gene expression
LOC5573185	285.512	3.08602	0.217022	14.2198	6.90057e-46	6.17707e-44	AAEL001958				GO:0003676	nucleic acid binding
LOC23687533	2246.62	-1.63057	0.114812	-14.2021	8.89511e-46	7.91393e-44	AAEL017113	H/ACA ribonucleoprotein complex subunit [Source:UniProtKB/TrEMBL;Acc:A0A1S4G5R5]			GO:0001522,GO:0003723,GO:0005634,GO:0005730,GO:0006364,GO:0031429,GO:0042254	pseudouridine synthesis,RNA binding,nucleus,nucleolus,rRNA processing,box H/ACA snoRNP complex,ribosome biogenesis
LOC5575931	3571.8	-2.13571	0.150831	-14.1595	1.6305e-45	1.44186e-43	AAEL012161				GO:0006081,GO:0016020,GO:0016021,GO:0016491,GO:0016620,GO:0055114	cellular aldehyde metabolic process,membrane,integral component of membrane,oxidoreductase activity,oxidoreductase activity, acting on the aldehyde or oxo group of donors, NAD or NADP as acceptor,oxidation-reduction process
LOC5575759	5762.28	-1.77456	0.125532	-14.1363	2.26825e-45	1.99374e-43	AAEL019529				GO:0003676,GO:0005515,GO:0005634	nucleic acid binding,protein binding,nucleus
LOC5579820	1012.76	-2.12191	0.150111	-14.1356	2.29195e-45	2.00251e-43	AAEL005524	Adenosylhomocysteinase [Source:UniProtKB/TrEMBL;Acc:Q179S1]			GO:0004013,GO:0006730,GO:0016787	adenosylhomocysteinase activity,one-carbon metabolic process,hydrolase activity
LOC5578000	1063.44	-1.83874	0.130584	-14.0809	4.97603e-45	4.32174e-43	AAEL003374	Suppressor of fused homolog [Source:UniProtKB/TrEMBL;Acc:Q17FL2]			GO:0005515,GO:0005634,GO:0005737,GO:0008134	protein binding,nucleus,cytoplasm,transcription factor binding
LOC5578682	309.311	-3.00699	0.213789	-14.0652	6.21447e-45	5.3654e-43	AAEL003611	stearoyl-coa desaturase [Source:VB Community Annotation]			GO:0006633,GO:0016020,GO:0016021,GO:0016491,GO:0016717,GO:0055114	fatty acid biosynthetic process,membrane,integral component of membrane,oxidoreductase activity,oxidoreductase activity, acting on paired donors, with oxidation of a pair of donors resulting in the reduction of molecular oxygen to two molecules of water,oxidation-reduction process
LOC5575944	472.301	3.00267	0.21384	14.0417	8.66254e-45	7.435e-43	AAEL025814				GO:0005515	protein binding
LOC5568482	1309.06	2.152	0.153675	14.0035	1.4833e-44	1.26566e-42	AAEL006880	Rab32 [Source:UniProtKB/TrEMBL;Acc:A0A1S4FEX4]			GO:0003924,GO:0005525,GO:0005794,GO:0005802,GO:0016020,GO:0016192,GO:0031982	GTPase activity,GTP binding,Golgi apparatus,trans-Golgi network,membrane,vesicle-mediated transport,vesicle
LOC5576699	2805.37	-1.20447	0.0860261	-14.0012	1.53251e-44	1.30005e-42	AAEL012725				GO:0005634	nucleus
LOC5580164	3194.37	3.0764	0.219971	13.9855	1.91234e-44	1.61288e-42	AAEL002557	cationic amino acid transporter [Source:VB Community Annotation]			GO:0016020,GO:0016021,GO:0022857,GO:0055085	membrane,integral component of membrane,transmembrane transporter activity,transmembrane transport
LOC110677952	4135.66	-2.18897	0.156716	-13.9677	2.4528e-44	2.04507e-42	AAEL028182				GO:0000287,GO:0004450,GO:0006102,GO:0016616,GO:0051287,GO:0055114	magnesium ion binding,isocitrate dehydrogenase (NADP+) activity,isocitrate metabolic process,oxidoreductase activity, acting on the CH-OH group of donors, NAD or NADP as acceptor,NAD binding,oxidation-reduction process
LOC5576561	4135.66	-2.18897	0.156716	-13.9677	2.4528e-44	2.04507e-42	AAEL020590				GO:0000287,GO:0004450,GO:0006097,GO:0006099,GO:0006102,GO:0016491,GO:0016616,GO:0046872,GO:0051287,GO:0055114	magnesium ion binding,isocitrate dehydrogenase (NADP+) activity,glyoxylate cycle,tricarboxylic acid cycle,isocitrate metabolic process,oxidoreductase activity,oxidoreductase activity, acting on the CH-OH group of donors, NAD or NADP as acceptor,metal ion binding,NAD binding,oxidation-reduction process
LOC110678733	835.031	-2.98801	0.214039	-13.9601	2.73032e-44	2.26353e-42	AAEL002126	Clip-Domain Serine Protease family A. Protease homologue. [Source:VB Community Annotation]	CLIPA15		GO:0004252,GO:0006508	serine-type endopeptidase activity,proteolysis
LOC5580108	766.812	-3.82735	0.274334	-13.9514	3.08444e-44	2.54266e-42	AAEL010941	Protein tweety homolog [Source:UniProtKB/TrEMBL;Acc:Q16RK1]			GO:0005254,GO:0005886,GO:0006811,GO:0006821,GO:0016020,GO:0016021,GO:0034707,GO:1902476	chloride channel activity,plasma membrane,ion transport,chloride transport,membrane,integral component of membrane,chloride channel complex,chloride transmembrane transport
LOC5570318	20687.1	-1.41405	0.10157	-13.9218	4.66878e-44	3.82709e-42	AAEL008257	heterogeneous nuclear ribonucleoprotein 27c [Source:VB Community Annotation]			GO:0003676,GO:0003723,GO:0003729	nucleic acid binding,RNA binding,mRNA binding
LOC5575417	5352.53	-1.23785	0.0890028	-13.908	5.66363e-44	4.61665e-42	AAEL011811	DNA replication licensing factor MCM3 [Source:VB Community Annotation]			GO:0000166,GO:0003677,GO:0003678,GO:0004386,GO:0005524,GO:0005634,GO:0006260,GO:0006270,GO:0016787,GO:0032508,GO:0042555	nucleotide binding,DNA binding,DNA helicase activity,helicase activity,ATP binding,nucleus,DNA replication,DNA replication initiation,hydrolase activity,DNA duplex unwinding,MCM complex
LOC5575133	330.031	-3.22376	0.232069	-13.8914	7.14098e-44	5.78856e-42	AAEL000314	malate dehydrogenase [Source:VB Community Annotation]			GO:0016491,GO:0055114	oxidoreductase activity,oxidation-reduction process
LOC5570534	5152.68	-1.90571	0.137382	-13.8716	9.4099e-44	7.58563e-42	AAEL001421	high density lipoprotien binding protein / vigilin [Source:VB Community Annotation]			GO:0003676,GO:0003723	nucleic acid binding,RNA binding
LOC5578057	708.379	-2.94552	0.212894	-13.8357	1.55315e-43	1.24516e-41	AAEL013489	sugar transporter [Source:VB Community Annotation]			GO:0016020,GO:0016021,GO:0022857,GO:0055085	membrane,integral component of membrane,transmembrane transporter activity,transmembrane transport
LOC110679018	216.759	-2.91492	0.210929	-13.8194	1.94587e-43	1.55149e-41	AAEL020147
LOC5567637	265.398	2.29072	0.16605	13.7954	2.71813e-43	2.15545e-41	AAEL006224	short-chain dehydrogenase [Source:VB Community Annotation]			GO:0016491,GO:0055114	oxidoreductase activity,oxidation-reduction process
LOC5565821	2071.53	2.10366	0.152842	13.7636	4.2177e-43	3.31879e-41
LOC5567031	10908.8	2.17462	0.158002	13.7632	4.24104e-43	3.31879e-41	AAEL005766	Fructose-bisphosphate aldolase [Source:UniProtKB/TrEMBL;Acc:Q178U8]			GO:0003824,GO:0004332,GO:0006096,GO:0016829	catalytic activity,fructose-bisphosphate aldolase activity,glycolytic process,lyase activity
LOC5574993	27375.4	1.32644	0.0963772	13.763	4.25341e-43	3.31879e-41	AAEL025362	60S ribosomal protein L10 [Source:UniProtKB/TrEMBL;Acc:Q1HRT6]			GO:0003735,GO:0005840,GO:0006412	structural constituent of ribosome,ribosome,translation
LOC5564016	231.156	-5.3838	0.391468	-13.7528	4.89824e-43	3.80161e-41	AAEL014277				GO:0000981,GO:0003677,GO:0005634,GO:0006355,GO:0006357,GO:0043565	DNA-binding transcription factor activity, RNA polymerase II-specific,DNA binding,nucleus,regulation of transcription, DNA-templated,regulation of transcription by RNA polymerase II,sequence-specific DNA binding
LOC5571775	1996.57	-1.7602	0.128005	-13.751	5.02144e-43	3.87661e-41	AAEL009291	retinoid-inducible serine carboxypeptidase (serine carboxypeptidase [Source:VB Community Annotation]			GO:0004180,GO:0004185,GO:0006508,GO:0008233,GO:0016787	carboxypeptidase activity,serine-type carboxypeptidase activity,proteolysis,peptidase activity,hydrolase activity
LOC23687787	3214.2	3.05736	0.222512	13.7402	5.83139e-43	4.4782e-41	AAEL017367
LOC5576729	780.688	2.83557	0.206482	13.7328	6.46117e-43	4.93586e-41	AAEL002950
LOC110676106	995.827	2.88691	0.210318	13.7264	7.05203e-43	5.35917e-41	AAEL026111				GO:0003924,GO:0005200,GO:0005525,GO:0005874,GO:0007017	GTPase activity,structural constituent of cytoskeleton,GTP binding,microtubule,microtubule-based process
LOC5572295	895.649	-2.75239	0.200793	-13.7076	9.1456e-43	6.91417e-41	AAEL007800	cytidine and deoxycytidylate deaminase zinc-binding region [Source:VB Community Annotation]			GO:0003700,GO:0005634,GO:0006357	DNA-binding transcription factor activity,nucleus,regulation of transcription by RNA polymerase II
LOC5571458	2169.16	-1.57318	0.115155	-13.6613	1.72754e-42	1.2976e-40	AAEL009093	crumbs [Source:VB Community Annotation]			GO:0005509,GO:0016020,GO:0016021	calcium ion binding,membrane,integral component of membrane
LOC5577589	410.636	2.8957	0.211967	13.6611	1.73416e-42	1.2976e-40	AAEL013300				GO:0005768,GO:0005770,GO:0016020,GO:0016021	endosome,late endosome,membrane,integral component of membrane
LOC110674662	2437.85	2.38972	0.175026	13.6535	1.92414e-42	1.43241e-40	AAEL020106
LOC5564563	615.691	-2.59987	0.190739	-13.6305	2.63708e-42	1.95318e-40	AAEL014510	Sprouty [Source:UniProtKB/TrEMBL;Acc:A0A1S4G215]			GO:0007275,GO:0009966,GO:0016020	multicellular organism development,regulation of signal transduction,membrane
LOC5578748	13063.8	-1.13515	0.0834063	-13.6099	3.49937e-42	2.57875e-40	AAEL003670	myelinprotein expression factor [Source:VB Community Annotation]			GO:0003676,GO:0003723,GO:0006904,GO:0016192	nucleic acid binding,RNA binding,vesicle docking involved in exocytosis,vesicle-mediated transport
LOC5579951	809.866	2.41358	0.177348	13.6093	3.52803e-42	2.58681e-40	AAEL006786	GTPase_rho [Source:VB Community Annotation]			GO:0003924,GO:0005525,GO:0007264	GTPase activity,GTP binding,small GTPase mediated signal transduction
LOC5577266	258.632	-2.40638	0.176926	-13.601	3.94788e-42	2.88018e-40	AAEL023768
LOC5568915	1489.97	-3.03458	0.223124	-13.6004	3.98348e-42	2.89169e-40	AAEL007205	gata-binding factor-c (transcription factor gata-c) [Source:VB Community Annotation]			GO:0003700,GO:0005634,GO:0006355,GO:0006357,GO:0008270,GO:0043565,GO:0046872	DNA-binding transcription factor activity,nucleus,regulation of transcription, DNA-templated,regulation of transcription by RNA polymerase II,zinc ion binding,sequence-specific DNA binding,metal ion binding
LOC5566539	422.988	2.31842	0.170499	13.5979	4.12236e-42	2.97769e-40	AAEL005473
LOC5567635	2569.25	-1.39845	0.10286	-13.5956	4.25269e-42	3.0567e-40	AAEL006211				GO:0005515	protein binding
LOC5565706	244.961	-3.79966	0.279852	-13.5774	5.45327e-42	3.90042e-40	AAEL021878	Zinc finger protein [Source:UniProtKB/TrEMBL;Acc:A0A1S4FUN1]			GO:0003676,GO:0003677	nucleic acid binding,DNA binding
LOC110676568	5581.85	2.75751	0.203153	13.5736	5.74647e-42	4.09008e-40	AAEL020990
LOC5567067	1450.33	-2.97608	0.219272	-13.5725	5.82606e-42	4.1266e-40	AAEL005822				GO:0016491,GO:0046872,GO:0055114	oxidoreductase activity,metal ion binding,oxidation-reduction process
LOC5578809	360.934	2.77184	0.204241	13.5714	5.91409e-42	4.16872e-40	AAEL013847	diacylglycerol kinase, zeta, iota [Source:VB Community Annotation]			GO:0003951,GO:0004143,GO:0005515,GO:0007165,GO:0007205,GO:0016301,GO:0016310,GO:0035556	NAD+ kinase activity,diacylglycerol kinase activity,protein binding,signal transduction,protein kinase C-activating G protein-coupled receptor signaling pathway,kinase activity,phosphorylation,intracellular signal transduction
LOC5576368	435.009	2.81775	0.207784	13.561	6.82001e-42	4.78417e-40	AAEL014924	Cytochrome P450 [Source:UniProtKB/TrEMBL;Acc:A0A1S4F322]			GO:0004497,GO:0005506,GO:0016020,GO:0016021,GO:0016491,GO:0016705,GO:0020037,GO:0046872,GO:0055114	monooxygenase activity,iron ion binding,membrane,integral component of membrane,oxidoreductase activity,oxidoreductase activity, acting on paired donors, with incorporation or reduction of molecular oxygen,heme binding,metal ion binding,oxidation-reduction process
LOC5575846	2371.54	-1.81289	0.1338	-13.5492	8.0105e-42	5.5924e-40	AAEL012119				GO:0003676,GO:0003723	nucleic acid binding,RNA binding
LOC5564054	185.557	-4.46366	0.329568	-13.5439	8.60394e-42	5.9781e-40	AAEL004048	UNC93A protein, putative [Source:VB Community Annotation]			GO:0016020,GO:0016021	membrane,integral component of membrane
LOC5571325	491.316	-3.4088	0.252101	-13.5215	1.16691e-41	8.06941e-40	AAEL008963	tyrosine aminotransferase [Source:VB Community Annotation]			GO:0003824,GO:0004838,GO:0006520,GO:0006559,GO:0006572,GO:0008483,GO:0009058,GO:0009072,GO:0030170	catalytic activity,L-tyrosine:2-oxoglutarate aminotransferase activity,cellular amino acid metabolic process,L-phenylalanine catabolic process,tyrosine catabolic process,transaminase activity,biosynthetic process,aromatic amino acid family metabolic process,pyridoxal phosphate binding
LOC5573540	243.007	2.45478	0.181567	13.52	1.19146e-41	8.20027e-40	AAEL010591	glutathione transferase [Source:VB Community Annotation]	GSTD6		GO:0005515	protein binding
LOC5569746	3340.79	2.56658	0.18993	13.5133	1.30481e-41	8.93823e-40	AAEL007875				GO:0005515	protein binding
LOC5579145	848.026	-1.89536	0.140407	-13.499	1.58434e-41	1.08024e-39	AAEL014021	mediator of RNA polymerase II transcription subunit 23 (Med23) [Source:VB Community Annotation]	Med23		GO:0005634	nucleus
LOC5569869	618.996	2.31139	0.1714	13.4854	1.90614e-41	1.2936e-39	AAEL007971	tyrosine transporter [Source:VB Community Annotation]			GO:0016020,GO:0016021,GO:0055085	membrane,integral component of membrane,transmembrane transport
LOC23687404	4758.96	2.65606	0.197071	13.4777	2.11663e-41	1.4298e-39	AAEL016984	Glyceraldehyde-3-phosphate dehydrogenase [Source:UniProtKB/TrEMBL;Acc:J9HYM2]			GO:0000166,GO:0004365,GO:0006006,GO:0006096,GO:0016491,GO:0016620,GO:0050661,GO:0051287,GO:0055114	nucleotide binding,glyceraldehyde-3-phosphate dehydrogenase (NAD+) (phosphorylating) activity,glucose metabolic process,glycolytic process,oxidoreductase activity,oxidoreductase activity, acting on the aldehyde or oxo group of donors, NAD or NADP as acceptor,NADP binding,NAD binding,oxidation-reduction process
LOC5563629	822.435	2.79797	0.207738	13.4687	2.38988e-41	1.60695e-39	AAEL027228
LOC5568514	362.46	-4.00869	0.29782	-13.4601	2.68623e-41	1.79793e-39	AAEL006932	transcription factor ap-2 [Source:VB Community Annotation]			GO:0003700,GO:0005634,GO:0006355	DNA-binding transcription factor activity,nucleus,regulation of transcription, DNA-templated
LOC5564238	3165.64	2.74924	0.20426	13.4595	2.7065e-41	1.80322e-39	AAEL004172	tubulin alpha chain [Source:VB Community Annotation]			GO:0000166,GO:0003924,GO:0005200,GO:0005525,GO:0005874,GO:0007010,GO:0007017	nucleotide binding,GTPase activity,structural constituent of cytoskeleton,GTP binding,microtubule,cytoskeleton organization,microtubule-based process
LOC5576501	1656.17	-1.50199	0.111752	-13.4404	3.50619e-41	2.3254e-39	AAEL012552	NADH-ubiquinone oxidoreductase [Source:VB Community Annotation]			GO:0005743,GO:0008137,GO:0009055,GO:0016020,GO:0016491,GO:0016651,GO:0042773,GO:0046872,GO:0051536,GO:0051539,GO:0055114	mitochondrial inner membrane,NADH dehydrogenase (ubiquinone) activity,electron transfer activity,membrane,oxidoreductase activity,oxidoreductase activity, acting on NAD(P)H,ATP synthesis coupled electron transport,metal ion binding,iron-sulfur cluster binding,4 iron, 4 sulfur cluster binding,oxidation-reduction process
LOC5564431	659.605	-4.68568	0.348693	-13.4378	3.62832e-41	2.39551e-39	AAEL022480
LOC5568344	2742.5	-1.5208	0.113178	-13.4373	3.6569e-41	2.40351e-39	AAEL019499				GO:0005515,GO:0006355,GO:0046983	protein binding,regulation of transcription, DNA-templated,protein dimerization activity
LOC5575412	3129.05	-1.75952	0.131005	-13.431	3.98151e-41	2.60512e-39	AAEL011815	Poly [ADP-ribose] polymerase [Source:UniProtKB/TrEMBL;Acc:Q16NZ4]			GO:0003677,GO:0003950,GO:0005634,GO:0006471,GO:0008270,GO:0016740,GO:0016757,GO:0046872,GO:0051287	DNA binding,NAD+ ADP-ribosyltransferase activity,nucleus,protein ADP-ribosylation,zinc ion binding,transferase activity,transferase activity, transferring glycosyl groups,metal ion binding,NAD binding
LOC5572898	21891.9	3.47067	0.259119	13.3941	6.54845e-41	4.26555e-39	AAEL010097				GO:0003723,GO:0042803,GO:0045450	RNA binding,protein homodimerization activity,bicoid mRNA localization
LOC5567701	576.309	2.6309	0.196616	13.3809	7.81558e-41	5.06832e-39	AAEL006262	mitochondrial carrier protein [Source:VB Community Annotation]			GO:0016020,GO:0016021	membrane,integral component of membrane
LOC5571882	1021.84	2.42243	0.181169	13.3711	8.91917e-41	5.75839e-39	AAEL012134	pur-alpha [Source:VB Community Annotation]			GO:0000977,GO:0003677,GO:0005634,GO:0032422	RNA polymerase II transcription regulatory region sequence-specific DNA binding,DNA binding,nucleus,purine-rich negative regulatory element binding
LOC5576867	709.818	2.15656	0.161451	13.3574	1.07305e-40	6.89731e-39	AAEL019672				GO:0003677,GO:0003700,GO:0005634,GO:0006355,GO:0007275,GO:0043565	DNA binding,DNA-binding transcription factor activity,nucleus,regulation of transcription, DNA-templated,multicellular organism development,sequence-specific DNA binding
LOC5571390	785.364	-1.6962	0.127106	-13.3448	1.27056e-40	8.13105e-39	AAEL009038	prolylcarboxypeptidase, putative [Source:VB Community Annotation]			GO:0006508,GO:0008236,GO:0016787	proteolysis,serine-type peptidase activity,hydrolase activity
LOC110680777	6588.92	2.78006	0.208921	13.3068	2.1147e-40	1.3474e-38	AAEL024387	Putative serine protease [Source:UniProtKB/TrEMBL;Acc:A0A0P6ITL8]			GO:0006508,GO:0008233	proteolysis,peptidase activity
LOC5568355	6712.46	3.36993	0.253355	13.3012	2.27756e-40	1.44486e-38	AAEL001061	glutathione S-transferase (GSTD1) [Source:VB Community Annotation]	GSTD1		GO:0005515	protein binding
LOC5564778	664.758	2.40821	0.181086	13.2987	2.35503e-40	1.48754e-38	AAEL004444	Zinc finger protein [Source:UniProtKB/TrEMBL;Acc:A0A1S4F7X7]			GO:0003676	nucleic acid binding
LOC5569465	1864.85	2.83746	0.21345	13.2933	2.53141e-40	1.59206e-38	AAEL007657	low-density lipoprotein receptor (ldl) [Source:VB Community Annotation]			GO:0005509,GO:0005515,GO:0006897,GO:0016020,GO:0016021	calcium ion binding,protein binding,endocytosis,membrane,integral component of membrane
LOC110678273	399.003	-2.6628	0.200529	-13.2789	3.06964e-40	1.92228e-38	AAEL019954				GO:0008271,GO:0008272,GO:0015116,GO:0016020,GO:0016021,GO:0055085	secondary active sulfate transmembrane transporter activity,sulfate transport,sulfate transmembrane transporter activity,membrane,integral component of membrane,transmembrane transport
LOC5570648	3401.54	-1.42906	0.107766	-13.2608	3.90855e-40	2.43716e-38	AAEL008468	cysteine synthase [Source:VB Community Annotation]			GO:0004122,GO:0005737,GO:0006535,GO:0008652,GO:0016829,GO:0019343,GO:0019344	cystathionine beta-synthase activity,cytoplasm,cysteine biosynthetic process from serine,cellular amino acid biosynthetic process,lyase activity,cysteine biosynthetic process via cystathionine,cysteine biosynthetic process
LOC5576861	1593.03	2.38169	0.179747	13.2502	4.49837e-40	2.79301e-38	AAEL012840	stathmin [Source:VB Community Annotation]			GO:0031110	regulation of microtubule polymerization or depolymerization
LOC5569797	860.147	-1.54607	0.116728	-13.2451	4.81433e-40	2.97652e-38	AAEL001300
LOC5573190	1058.5	2.48786	0.188031	13.2311	5.80535e-40	3.57409e-38	AAEL001959
LOC5570053	805.493	2.45077	0.185265	13.2285	6.00985e-40	3.68444e-38	AAEL000204
LOC5575223	1377.14	1.6965	0.128331	13.2198	6.74513e-40	4.11791e-38	AAEL010608	succinate dehydrogenase [Source:VB Community Annotation]			GO:0005743,GO:0006099,GO:0008177,GO:0016020,GO:0016491,GO:0016627,GO:0022900,GO:0050660,GO:0055114	mitochondrial inner membrane,tricarboxylic acid cycle,succinate dehydrogenase (ubiquinone) activity,membrane,oxidoreductase activity,oxidoreductase activity, acting on the CH-CH group of donors,electron transport chain,flavin adenine dinucleotide binding,oxidation-reduction process
LOC110675809	319.78	2.8563	0.216134	13.2154	7.15317e-40	4.34883e-38	AAEL025808				GO:0005515,GO:0019005,GO:0031146	protein binding,SCF ubiquitin ligase complex,SCF-dependent proteasomal ubiquitin-dependent protein catabolic process
LOC110675525	527.048	8.68721	0.658441	13.1936	9.55068e-40	5.78232e-38	AAEL025435
LOC5564934	380.594	2.24616	0.17039	13.1825	1.10733e-39	6.67647e-38	AAEL022219
LOC5565670	316.146	-2.61059	0.198212	-13.1708	1.29305e-39	7.76417e-38	AAEL014931	sarm1 [Source:VB Community Annotation]			GO:0002376,GO:0005515,GO:0005737,GO:0007165,GO:0016787,GO:0034128,GO:0035591,GO:0045087,GO:0048678,GO:0050135,GO:0061809	immune system process,protein binding,cytoplasm,signal transduction,hydrolase activity,negative regulation of MyD88-independent toll-like receptor signaling pathway,signaling adaptor activity,innate immune response,response to axon injury,NAD(P)+ nucleosidase activity,NAD+ nucleotidase, cyclic ADP-ribose generating
LOC5568694	2592.52	3.28669	0.249601	13.1678	1.34492e-39	8.04248e-38	AAEL007046	mitochondrial brown fat uncoupling protein [Source:VB Community Annotation]			GO:0016020,GO:0016021,GO:0022857	membrane,integral component of membrane,transmembrane transporter activity
LOC23687449	749.725	2.82281	0.214571	13.1556	1.57999e-39	9.40963e-38	AAEL017029				GO:0004497,GO:0004505,GO:0005506,GO:0006559,GO:0009072,GO:0016491,GO:0016714,GO:0046872,GO:0055114	monooxygenase activity,phenylalanine 4-monooxygenase activity,iron ion binding,L-phenylalanine catabolic process,aromatic amino acid family metabolic process,oxidoreductase activity,oxidoreductase activity, acting on paired donors, with incorporation or reduction of molecular oxygen, reduced pteridine as one donor, and incorporation of one atom of oxygen,metal ion binding,oxidation-reduction proc…
LOC5567734	1934.13	3.0086	0.229087	13.133	2.13081e-39	1.26385e-37	AAEL024283				GO:0003676,GO:0003677,GO:0005515	nucleic acid binding,DNA binding,protein binding
LOC110675513	1392.05	-3.04621	0.23212	-13.1234	2.41772e-39	1.42822e-37	AAEL024984
LOC5571293	3667.64	2.04542	0.156162	13.0981	3.37546e-39	1.98594e-37	AAEL001593	glycerol-3-phosphate dehydrogenase [Source:VB Community Annotation]			GO:0004367,GO:0005975,GO:0006072,GO:0006650,GO:0009331,GO:0016491,GO:0016616,GO:0042803,GO:0046168,GO:0051287,GO:0055114	glycerol-3-phosphate dehydrogenase [NAD+] activity,carbohydrate metabolic process,glycerol-3-phosphate metabolic process,glycerophospholipid metabolic process,glycerol-3-phosphate dehydrogenase complex,oxidoreductase activity,oxidoreductase activity, acting on the CH-OH group of donors, NAD or NADP as acceptor,protein homodimerization activity,glycerol-3-phosphate catabolic process,NAD binding,ox…
LOC5564305	2266.84	-2.14747	0.164233	-13.0757	4.53213e-39	2.65576e-37	AAEL001168				GO:0003700,GO:0005634,GO:0006357	DNA-binding transcription factor activity,nucleus,regulation of transcription by RNA polymerase II
LOC5575710	841.565	2.72953	0.208796	13.0727	4.71512e-39	2.75193e-37	AAEL012018
LOC5572986	325.958	3.32004	0.254384	13.0513	6.24948e-39	3.63292e-37	AAEL001928	Actin-1 [Source:UniProtKB/Swiss-Prot;Acc:P49128]	Act1		GO:0000166,GO:0005524,GO:0005737,GO:0005856	nucleotide binding,ATP binding,cytoplasm,cytoskeleton
LOC5566322	5692.08	-1.85979	0.142553	-13.0463	6.67314e-39	3.8638e-37	AAEL005289	ornithine aminotransferase [Source:VB Community Annotation]			GO:0003824,GO:0004587,GO:0008483,GO:0030170,GO:0050155,GO:0055129	catalytic activity,ornithine-oxo-acid transaminase activity,transaminase activity,pyridoxal phosphate binding,ornithine(lysine) transaminase activity,L-proline biosynthetic process
LOC5566227	2566.76	1.5472	0.118596	13.0459	6.70321e-39	3.86587e-37	AAEL005254	dynactin P62 subunit [Source:VB Community Annotation]			GO:0005869	dynactin complex
LOC5577354	2907.61	2.08055	0.159506	13.0438	6.89674e-39	3.96182e-37	AAEL000424	leucine aminopeptidase [Source:VB Community Annotation]			GO:0004177,GO:0004842,GO:0005515,GO:0005737,GO:0006508,GO:0008233,GO:0008235,GO:0016567,GO:0016787,GO:0016874,GO:0019538,GO:0030145,GO:0046872,GO:0061630,GO:0070006	aminopeptidase activity,ubiquitin-protein transferase activity,protein binding,cytoplasm,proteolysis,peptidase activity,metalloexopeptidase activity,protein ubiquitination,hydrolase activity,ligase activity,protein metabolic process,manganese ion binding,metal ion binding,ubiquitin protein ligase activity,metalloaminopeptidase activity
LOC5578974	995.063	2.13393	0.163846	13.024	8.93954e-39	5.11517e-37	AAEL019746
LOC5571448	583.119	2.06888	0.158891	13.0208	9.32468e-39	5.3147e-37	AAEL009077	Alkaline phosphatase [Source:UniProtKB/TrEMBL;Acc:A0A0P6JST2]	ALP1		GO:0003824,GO:0004035,GO:0016311,GO:0016787,GO:0016791,GO:0031225	catalytic activity,alkaline phosphatase activity,dephosphorylation,hydrolase activity,phosphatase activity,anchored component of membrane
LOC5573583	2186.67	-3.04676	0.234005	-13.02	9.41103e-39	5.34305e-37	AAEL002130	ecdysone inducible protein L2, putative [Source:VB Community Annotation]			GO:0005515,GO:0005886,GO:0007155,GO:0007411	protein binding,plasma membrane,cell adhesion,axon guidance
LOC5570222	300.859	-2.75097	0.211401	-13.0131	1.03114e-38	5.83155e-37	AAEL008186
LOC110680812	137.201	-5.1163	0.393451	-13.0036	1.16653e-38	6.57177e-37	AAEL028140
LOC110678056	614.03	-2.35016	0.180847	-12.9953	1.3005e-38	7.2983e-37	AAEL027336				GO:0016491,GO:0016620,GO:0055114	oxidoreductase activity,oxidoreductase activity, acting on the aldehyde or oxo group of donors, NAD or NADP as acceptor,oxidation-reduction process
LOC5567700	184.732	3.10499	0.239147	12.9836	1.51548e-38	8.47216e-37	AAEL006274	glucose transporter (sugar transporter [Source:VB Community Annotation]			GO:0016020,GO:0016021,GO:0022857,GO:0055085	membrane,integral component of membrane,transmembrane transporter activity,transmembrane transport
LOC5574493	1117.69	3.22827	0.248736	12.9787	1.61555e-38	8.99712e-37	AAEL002406				GO:0016020,GO:0016021,GO:0055114	membrane,integral component of membrane,oxidation-reduction process
LOC5568318	2289.58	-1.58386	0.122251	-12.9558	2.1794e-38	1.20911e-36	AAEL006740
LOC5563788	1546.01	1.38749	0.107203	12.9426	2.58726e-38	1.42995e-36	AAEL003927				GO:0016020,GO:0016021	membrane,integral component of membrane
LOC5565978	118.145	-4.55344	0.351942	-12.938	2.74548e-38	1.51167e-36	AAEL027400				GO:0016020,GO:0016740,GO:0016757	membrane,transferase activity,transferase activity, transferring glycosyl groups
LOC5578929	1698.03	-1.30859	0.101226	-12.9274	3.15443e-38	1.73031e-36	AAEL003754	actin binding [Source:VB Community Annotation]			GO:0005198,GO:0005737,GO:0005886,GO:0005912,GO:0007155,GO:0015629,GO:0016020,GO:0030054,GO:0045296,GO:0051015	structural molecule activity,cytoplasm,plasma membrane,adherens junction,cell adhesion,actin cytoskeleton,membrane,cell junction,cadherin binding,actin filament binding
LOC5570999	2211.84	-1.36739	0.105803	-12.924	3.29762e-38	1.80208e-36	AAEL008741	importin (ran-binding protein) [Source:VB Community Annotation]			GO:0005515,GO:0005634,GO:0006886,GO:0008536	protein binding,nucleus,intracellular protein transport,Ran GTPase binding
LOC5577527	2484.46	-1.34096	0.103865	-12.9107	3.91834e-38	2.1333e-36	AAEL005791				GO:0005515,GO:0005634,GO:0005737,GO:0007051	protein binding,nucleus,cytoplasm,spindle organization
LOC5563804	904.056	-2.21904	0.171929	-12.9067	4.12597e-38	2.23799e-36	AAEL014136				GO:0016020,GO:0016021	membrane,integral component of membrane
LOC5564133	1671.62	2.02054	0.156951	12.8737	6.32615e-38	3.4187e-36	AAEL004088	aldo-keto reductase [Source:VB Community Annotation]			GO:0016491,GO:0055114	oxidoreductase activity,oxidation-reduction process
LOC5572369	249.473	-2.83366	0.220136	-12.8723	6.44526e-38	3.47021e-36	AAEL009748	2-hydroxyphytanoyl-coa lyase [Source:UniProtKB/TrEMBL;Acc:Q16UY3]			GO:0000287,GO:0003824,GO:0030976	magnesium ion binding,catalytic activity,thiamine pyrophosphate binding
LOC5571900	6321.83	-1.20215	0.0935387	-12.8519	8.38781e-38	4.49951e-36	AAEL009377	rap1 and [Source:VB Community Annotation]			GO:0000166,GO:0003924,GO:0005525,GO:0007165,GO:0016020,GO:0032486	nucleotide binding,GTPase activity,GTP binding,signal transduction,membrane,Rap protein signal transduction
LOC5569616	503.474	-3.00817	0.234115	-12.8491	8.69927e-38	4.64949e-36	AAEL014832	Putative sorbin and sh3 domain-containing protein [Source:UniProtKB/TrEMBL;Acc:A0A0N8ERZ4]			GO:0005515	protein binding
LOC23687932	785.238	-2.80602	0.218633	-12.8344	1.05226e-37	5.60349e-36	AAEL017512				GO:0004553,GO:0004566,GO:0005764,GO:0005975,GO:0008152,GO:0016787,GO:0016798	hydrolase activity, hydrolyzing O-glycosyl compounds,beta-glucuronidase activity,lysosome,carbohydrate metabolic process,metabolic process,hydrolase activity,hydrolase activity, acting on glycosyl bonds
LOC5571884	3082.84	2.58106	0.201371	12.8174	1.3104e-37	6.95275e-36	AAEL009362	cationic amino acid transporter [Source:VB Community Annotation]			GO:0016020,GO:0016021,GO:0022857,GO:0055085	membrane,integral component of membrane,transmembrane transporter activity,transmembrane transport
LOC5569520	3437.68	2.56578	0.200378	12.8047	1.54305e-37	8.15747e-36	AAEL007707	malate dehydrogenase [Source:VB Community Annotation]			GO:0003824,GO:0005975,GO:0006099,GO:0006108,GO:0016491,GO:0016615,GO:0016616,GO:0019752,GO:0030060,GO:0055114	catalytic activity,carbohydrate metabolic process,tricarboxylic acid cycle,malate metabolic process,oxidoreductase activity,malate dehydrogenase activity,oxidoreductase activity, acting on the CH-OH group of donors, NAD or NADP as acceptor,carboxylic acid metabolic process,L-malate dehydrogenase activity,oxidation-reduction process
LOC5564953	3993.11	-2.86093	0.223548	-12.7978	1.68625e-37	8.88234e-36	AAEL012363
LOC5564587	11845.2	-3.11373	0.243954	-12.7636	2.61884e-37	1.37452e-35	AAEL004344	zinc finger protein [Source:VB Community Annotation]			GO:0003676	nucleic acid binding
LOC5571389	978.622	-2.04971	0.16062	-12.7612	2.69987e-37	1.41196e-35	AAEL009027	Mediator of RNA polymerase II transcription subunit 24 (Med24) [Source:VB Community Annotation]	Med24		GO:0005634,GO:0016592	nucleus,mediator complex
LOC5578826	666.315	-4.14511	0.32534	-12.7408	3.50577e-37	1.82688e-35	AAEL022268				GO:0016020,GO:0016021	membrane,integral component of membrane
LOC5564119	511.932	2.55667	0.200673	12.7405	3.52098e-37	1.82828e-35	AAEL019770				GO:0003677,GO:0003700,GO:0005634,GO:0006355	DNA binding,DNA-binding transcription factor activity,nucleus,regulation of transcription, DNA-templated
LOC5569585	560.998	-2.73415	0.214717	-12.7337	3.84195e-37	1.98787e-35	AAEL001281				GO:0005452,GO:0006811,GO:0006820,GO:0008509,GO:0015698,GO:0016020,GO:0016021,GO:0098656	inorganic anion exchanger activity,ion transport,anion transport,anion transmembrane transporter activity,inorganic anion transport,membrane,integral component of membrane,anion transmembrane transport
LOC5563905	3720.95	-3.10984	0.244512	-12.7186	4.66363e-37	2.40449e-35	AAEL004000	Toll-like receptor [Source:VB Community Annotation]	TOLL10		GO:0005515,GO:0007165,GO:0016020,GO:0016021	protein binding,signal transduction,membrane,integral component of membrane
LOC5564109	366.357	1.91574	0.150667	12.715	4.87813e-37	2.50623e-35	AAEL004096	aldo-keto reductase [Source:VB Community Annotation]			GO:0016491,GO:0055114	oxidoreductase activity,oxidation-reduction process
LOC5571896	1193.84	1.81953	0.143165	12.7093	5.24784e-37	2.68671e-35	AAEL009372				GO:0017178,GO:0017183	diphthine-ammonia ligase activity,peptidyl-diphthamide biosynthetic process from peptidyl-histidine
LOC5571215	662.059	-2.91917	0.229717	-12.7077	5.36043e-37	2.73476e-35	AAEL007191	amino acid transporter [Source:VB Community Annotation]			GO:0016020,GO:0016021	membrane,integral component of membrane
LOC5576918	125.809	3.4492	0.271498	12.7044	5.59194e-37	2.84293e-35	AAEL012863	Predicted acetyltransferase [Source:UniProtKB/TrEMBL;Acc:Q1HR96]			GO:0008080,GO:0016740	N-acetyltransferase activity,transferase activity
LOC5570471	570.13	2.36365	0.186431	12.6784	7.78681e-37	3.94505e-35	AAEL007189	nocturnin [Source:VB Community Annotation]			GO:0004535,GO:0007623,GO:0090503	poly(A)-specific ribonuclease activity,circadian rhythm,RNA phosphodiester bond hydrolysis, exonucleolytic
LOC5572553	4403.28	-1.59206	0.125616	-12.6741	8.2333e-37	4.15682e-35	AAEL020592				GO:0005515,GO:0046872,GO:0046907	protein binding,metal ion binding,intracellular transport
LOC5575142	418.498	1.75525	0.138592	12.6649	9.25518e-37	4.65663e-35	AAEL020382	Acetyl-coenzyme A synthetase [Source:UniProtKB/TrEMBL;Acc:Q16EU8]			GO:0000166,GO:0003824,GO:0003987,GO:0005524,GO:0016208,GO:0016874,GO:0019427	nucleotide binding,catalytic activity,acetate-CoA ligase activity,ATP binding,AMP binding,ligase activity,acetyl-CoA biosynthetic process from acetate
LOC5572929	1512.41	-1.94728	0.153823	-12.6592	9.9494e-37	4.98872e-35	AAEL010148	sodium/potassium-dependent ATPase beta-2 subunit [Source:VB Community Annotation]			GO:0005886,GO:0005890,GO:0006813,GO:0006814,GO:0016020,GO:0016021	plasma membrane,sodium:potassium-exchanging ATPase complex,potassium ion transport,sodium ion transport,membrane,integral component of membrane
LOC5575241	166.543	2.7158	0.214855	12.6401	1.26851e-36	6.33865e-35	AAEL011715				GO:0005634,GO:0006281,GO:0030915,GO:0035556,GO:0046872	nucleus,DNA repair,Smc5-Smc6 complex,intracellular signal transduction,metal ion binding
LOC110681084	411.769	-2.06486	0.163526	-12.6271	1.4973e-36	7.45637e-35	AAEL021939				GO:0005515,GO:0008270	protein binding,zinc ion binding
LOC5564380	3364.12	-2.2313	0.176893	-12.6138	1.77175e-36	8.79308e-35	AAEL014413	cytochrome P450 [Source:VB Community Annotation]	CYP304C1		GO:0004497,GO:0005506,GO:0016020,GO:0016021,GO:0016705,GO:0020037,GO:0055114	monooxygenase activity,iron ion binding,membrane,integral component of membrane,oxidoreductase activity, acting on paired donors, with incorporation or reduction of molecular oxygen,heme binding,oxidation-reduction process
LOC5577808	718.32	2.19928	0.174547	12.5999	2.11287e-36	1.04505e-34	AAEL013394				GO:0004140,GO:0005524,GO:0015937,GO:0016020,GO:0016021,GO:0016310	dephospho-CoA kinase activity,ATP binding,coenzyme A biosynthetic process,membrane,integral component of membrane,phosphorylation
LOC5567896	310.198	2.77025	0.219906	12.5974	2.18088e-36	1.07504e-34	AAEL006354	epoxide hydrolase [Source:VB Community Annotation]			GO:0003824,GO:0016020,GO:0016021	catalytic activity,membrane,integral component of membrane
LOC5572987	1728.92	-1.76981	0.140516	-12.5951	2.24815e-36	1.10447e-34	AAEL001918
LOC110680481	1512.62	-2.9055	0.230997	-12.5781	2.78824e-36	1.36287e-34	AAEL022256				GO:0016614,GO:0050660,GO:0055114	oxidoreductase activity, acting on CH-OH group of donors,flavin adenine dinucleotide binding,oxidation-reduction process
LOC5580252	4852.4	-1.44557	0.114929	-12.5779	2.7928e-36	1.36287e-34	AAEL012546	DNA replication licensing factor MCM6 [Source:VB Community Annotation]			GO:0000166,GO:0003677,GO:0003678,GO:0004386,GO:0005524,GO:0005634,GO:0006260,GO:0006270,GO:0016787,GO:0032508,GO:0042555	nucleotide binding,DNA binding,DNA helicase activity,helicase activity,ATP binding,nucleus,DNA replication,DNA replication initiation,hydrolase activity,DNA duplex unwinding,MCM complex
LOC5567565	4247.18	-1.72733	0.137338	-12.5772	2.81984e-36	1.37148e-34	AAEL006169	Lysosomal aspartic protease Precursor (EC 3.4.23.-) [Source:VB Community Annotation]			GO:0004190,GO:0005764,GO:0006508,GO:0008233,GO:0016787	aspartic-type endopeptidase activity,lysosome,proteolysis,peptidase activity,hydrolase activity
LOC5567770	401.859	2.63468	0.209524	12.5746	2.91229e-36	1.41174e-34	AAEL000111	nitrilase, putative [Source:VB Community Annotation]			GO:0006807	nitrogen compound metabolic process
LOC5571231	158.227	2.96047	0.235481	12.572	3.01053e-36	1.45452e-34	AAEL008932	inward-rectifying potassium channel [Source:VB Community Annotation]	Kir1	Irk1	GO:0005242,GO:0005244,GO:0006811,GO:0006813,GO:0016020,GO:0016021,GO:0034220,GO:0034765,GO:0071805	inward rectifier potassium channel activity,voltage-gated ion channel activity,ion transport,potassium ion transport,membrane,integral component of membrane,ion transmembrane transport,regulation of ion transmembrane transport,potassium ion transmembrane transport
LOC5569464	199.755	2.61801	0.208517	12.5554	3.71319e-36	1.78809e-34	AAEL007661	rab-40 [Source:VB Community Annotation]			GO:0003924,GO:0005525,GO:0035556	GTPase activity,GTP binding,intracellular signal transduction
LOC5574266	204.464	2.8191	0.224726	12.5447	4.25256e-36	2.04109e-34	AAEL006636	GPCR Leukokinin Family [Source:VB Community Annotation]	GPRLLK1_1		GO:0004930,GO:0004983,GO:0007165,GO:0007186,GO:0007218,GO:0016020,GO:0016021	G protein-coupled receptor activity,neuropeptide Y receptor activity,signal transduction,G protein-coupled receptor signaling pathway,neuropeptide signaling pathway,membrane,integral component of membrane
LOC5575512	5287.5	-1.53764	0.122637	-12.5382	4.61624e-36	2.20838e-34	AAEL011881				GO:0005515,GO:0046983	protein binding,protein dimerization activity
LOC5570054	585.3	2.70502	0.216008	12.5228	5.60136e-36	2.6709e-34	AAEL000186				GO:0003839,GO:0016829	gamma-glutamylcyclotransferase activity,lyase activity
LOC5579026	858.787	2.52775	0.2019	12.5198	5.81831e-36	2.76531e-34	AAEL013965				GO:0046872	metal ion binding
LOC5577660	1255.19	2.42053	0.193362	12.5181	5.9411e-36	2.8145e-34	AAEL003243	Clip-Domain Serine Protease family B. [Source:VB Community Annotation]	CLIPB13A		GO:0004252,GO:0005576,GO:0006508,GO:0008233,GO:0008236,GO:0016787	serine-type endopeptidase activity,extracellular region,proteolysis,peptidase activity,serine-type peptidase activity,hydrolase activity
LOC5567999	1640.24	1.85135	0.148127	12.4985	7.61192e-36	3.59435e-34	AAEL006449	ser/thr protein kinase-lyk4 [Source:VB Community Annotation]			GO:0000166,GO:0004672,GO:0005524,GO:0005634,GO:0005737,GO:0006468,GO:0016740	nucleotide binding,protein kinase activity,ATP binding,nucleus,cytoplasm,protein phosphorylation,transferase activity
LOC5565553	112829	2.24511	0.179641	12.4977	7.67972e-36	3.61467e-34	AAEL022140
LOC5571869	274.035	2.10789	0.169067	12.4678	1.11832e-35	5.24675e-34	AAEL021624				GO:0005623,GO:0006662,GO:0015035,GO:0045454,GO:0055114	obsolete cell,glycerol ether metabolic process,protein disulfide oxidoreductase activity,cell redox homeostasis,oxidation-reduction process
LOC5570423	1582.18	-1.39695	0.112076	-12.4643	1.16906e-35	5.46721e-34	AAEL008330	hexaprenyldihydroxybenzoate methyltransferase [Source:VB Community Annotation]			GO:0004395,GO:0005739,GO:0005743,GO:0006744,GO:0008168,GO:0008425,GO:0008689,GO:0010420,GO:0016020,GO:0016740,GO:0031314,GO:0032259,GO:0061542,GO:1990886	hexaprenyldihydroxybenzoate methyltransferase activity,mitochondrion,mitochondrial inner membrane,ubiquinone biosynthetic process,methyltransferase activity,2-polyprenyl-6-methoxy-1,4-benzoquinone methyltransferase activity,3-demethylubiquinone-9 3-O-methyltransferase activity,3,4-dihydroxy-5-polyprenylbenzoic acid O-methyltransferase activity,membrane,transferase activity,extrinsic component of …
LOC5564933	440.157	-3.64935	0.292969	-12.4564	1.28997e-35	6.01338e-34	AAEL021679				GO:0005515,GO:0005524,GO:0016887,GO:0022008	protein binding,ATP binding,ATPase activity,neurogenesis
LOC5576703	630.003	2.39455	0.192242	12.4559	1.29907e-35	6.03653e-34	AAEL011791
LOC5571613	2750.32	-2.94707	0.236716	-12.4498	1.40184e-35	6.49342e-34	AAEL009193	glucose dehydrogenase [Source:VB Community Annotation]			GO:0016614,GO:0050660,GO:0055114	oxidoreductase activity, acting on CH-OH group of donors,flavin adenine dinucleotide binding,oxidation-reduction process
LOC5570074	1471.49	-2.70962	0.217679	-12.4478	1.43791e-35	6.63941e-34	AAEL001344	pair-rule protein odd-paired [Source:VB Community Annotation]			GO:0003676,GO:0003677,GO:0005634,GO:0046872	nucleic acid binding,DNA binding,nucleus,metal ion binding
LOC110675493	16555.4	1.22518	0.0985347	12.434	1.70786e-35	7.86103e-34	AAEL028043	60S ribosomal protein L28, putative [Source:UniProtKB/TrEMBL;Acc:Q1HRJ1]			GO:0003735,GO:0005840,GO:0006412	structural constituent of ribosome,ribosome,translation
LOC5564702	398.303	1.95555	0.157292	12.4326	1.7385e-35	7.97688e-34	AAEL020642				GO:0000139,GO:0005737,GO:0005794,GO:0016020,GO:0016021	Golgi membrane,cytoplasm,Golgi apparatus,membrane,integral component of membrane
LOC23687857	6409.7	-1.16774	0.0941247	-12.4063	2.41478e-35	1.10452e-33	AAEL017437				GO:0005634,GO:0005730,GO:0042254	nucleus,nucleolus,ribosome biogenesis
LOC110674150	213.003	-3.07317	0.248035	-12.3901	2.95808e-35	1.34879e-33	AAEL017975	heat shock protein HSP70 [Source:VB Community Annotation]	HSP70Ba
LOC5579172	7404.35	-1.82666	0.147505	-12.3837	3.20333e-35	1.45607e-33	AAEL003888	ubiquitin [Source:VB Community Annotation]			GO:0005515	protein binding
LOC110681383	2534.61	-1.36153	0.110022	-12.3751	3.56485e-35	1.61536e-33	AAEL025151				GO:0005623,GO:0005783,GO:0015031,GO:0016020,GO:0016021,GO:0031204	obsolete cell,endoplasmic reticulum,protein transport,membrane,integral component of membrane,posttranslational protein targeting to membrane, translocation
LOC5578090	7217	-1.25293	0.101279	-12.371	3.75017e-35	1.69408e-33	AAEL003415	lamin [Source:VB Community Annotation]			GO:0005882	intermediate filament
LOC5564130	634.584	2.24609	0.181599	12.3684	3.87505e-35	1.74509e-33	AAEL004102	aldo-keto reductase [Source:VB Community Annotation]			GO:0016491,GO:0055114	oxidoreductase activity,oxidation-reduction process
LOC5577231	3910.46	-3.01054	0.243559	-12.3606	4.26718e-35	1.91577e-33	AAEL003128				GO:0005515,GO:0006886	protein binding,intracellular protein transport
LOC5578706	525.154	2.69339	0.218025	12.3536	4.65768e-35	2.08467e-33	AAEL023635
LOC5569110	1800.68	-2.08722	0.168987	-12.3514	4.78904e-35	2.13691e-33	AAEL007374	yellow protein precursor, putative [Source:VB Community Annotation]
LOC5569901	2524.72	-1.35701	0.109912	-12.3463	5.09801e-35	2.26784e-33	AAEL007987	SEC63 protein, putative [Source:VB Community Annotation]	sec63		GO:0005623,GO:0005783,GO:0015031,GO:0016020,GO:0016021,GO:0031204	obsolete cell,endoplasmic reticulum,protein transport,membrane,integral component of membrane,posttranslational protein targeting to membrane, translocation
LOC5564768	5820.37	2.00919	0.162824	12.3396	5.54057e-35	2.45722e-33	AAEL004434	transketolase [Source:VB Community Annotation]			GO:0003824,GO:0016740,GO:0046872	catalytic activity,transferase activity,metal ion binding
LOC5578775	1007.58	-1.61028	0.130633	-12.3268	6.49777e-35	2.873e-33	AAEL003651				GO:0003824,GO:0016020,GO:0016021	catalytic activity,membrane,integral component of membrane
LOC5569488	1076.69	-3.49332	0.283478	-12.3231	6.80329e-35	2.999e-33	AAEL007670	tiptop [Source:VB Community Annotation]			GO:0000122,GO:0003676,GO:0003677,GO:0005634,GO:0010468,GO:0046872,GO:0048730,GO:0048749	negative regulation of transcription by RNA polymerase II,nucleic acid binding,DNA binding,nucleus,regulation of gene expression,metal ion binding,epidermis morphogenesis,compound eye development
LOC5568118	448.793	-1.92633	0.156343	-12.3212	6.966e-35	3.06147e-33	AAEL006543
LOC5564473	216.808	2.43054	0.197471	12.3083	8.17306e-35	3.58117e-33	AAEL014451				GO:0016020,GO:0016021	membrane,integral component of membrane
LOC110681274	136.503	-5.98723	0.486541	-12.3057	8.43934e-35	3.68678e-33	AAEL021198				GO:0005509,GO:0007156,GO:0016020	calcium ion binding,homophilic cell adhesion via plasma membrane adhesion molecules,membrane
LOC5575836	414.75	2.66757	0.216977	12.2943	9.72531e-35	4.23588e-33	AAEL012098	synaptic vesicle protein [Source:VB Community Annotation]			GO:0016020,GO:0016021,GO:0022857,GO:0055085	membrane,integral component of membrane,transmembrane transporter activity,transmembrane transport
LOC5571189	1227.94	1.91768	0.156125	12.283	1.11787e-34	4.85441e-33	AAEL008878	diacylglycerol o-acyltransferase [Source:VB Community Annotation]			GO:0005783,GO:0005789,GO:0016020,GO:0016021,GO:0016740,GO:0016746,GO:0016747	endoplasmic reticulum,endoplasmic reticulum membrane,membrane,integral component of membrane,transferase activity,transferase activity, transferring acyl groups,transferase activity, transferring acyl groups other than amino-acyl groups
LOC5566642	4219.95	-1.31944	0.107635	-12.2585	1.51233e-34	6.54791e-33	AAEL020002				GO:0005515	protein binding
LOC5571779	5376.74	-2.98308	0.24379	-12.2363	1.98908e-34	8.58659e-33	AAEL009295	lachesin [Source:VB Community Annotation]
LOC5578270	852.292	-2.36345	0.19363	-12.206	2.88834e-34	1.24318e-32	AAEL008639				GO:0000139,GO:0005509,GO:0005794,GO:0005886,GO:0007156,GO:0016020,GO:0042995	Golgi membrane,calcium ion binding,Golgi apparatus,plasma membrane,homophilic cell adhesion via plasma membrane adhesion molecules,membrane,cell projection
LOC5570810	991.749	-2.35881	0.193316	-12.2019	3.03765e-34	1.3036e-32	AAEL008574	acyl-CoA oxidase [Source:VB Community Annotation]			GO:0003997,GO:0005777,GO:0006629,GO:0006631,GO:0006635,GO:0016491,GO:0016627,GO:0050660,GO:0055114,GO:0071949	acyl-CoA oxidase activity,peroxisome,lipid metabolic process,fatty acid metabolic process,fatty acid beta-oxidation,oxidoreductase activity,oxidoreductase activity, acting on the CH-CH group of donors,flavin adenine dinucleotide binding,oxidation-reduction process,FAD binding
LOC5567373	725.889	-2.63716	0.216161	-12.2	3.10813e-34	1.32993e-32	AAEL006028				GO:0005319,GO:0006869	lipid transporter activity,lipid transport
LOC5565707	408.452	2.06332	0.16937	12.1823	3.86075e-34	1.64714e-32	AAEL014949				GO:0016787	hydrolase activity
LOC5567198	803.884	3.94344	0.323748	12.1806	3.94561e-34	1.67844e-32	AAEL019837				GO:0005515	protein binding
LOC5567562	808.128	-2.27388	0.186699	-12.1794	4.00247e-34	1.69767e-32	AAEL006167	runt [Source:VB Community Annotation]			GO:0003677,GO:0003700,GO:0005524,GO:0005634,GO:0006355	DNA binding,DNA-binding transcription factor activity,ATP binding,nucleus,regulation of transcription, DNA-templated
LOC5572071	5434.61	-1.80402	0.148195	-12.1733	4.31487e-34	1.82488e-32	AAEL001715	chaperonin [Source:VB Community Annotation]			GO:0000166,GO:0005524,GO:0005737,GO:0006457,GO:0051082	nucleotide binding,ATP binding,cytoplasm,protein folding,unfolded protein binding
LOC5570170	1043.18	3.37423	0.277214	12.1719	4.38601e-34	1.8496e-32	AAEL008137				GO:0005515	protein binding
LOC110681114	4051.88	1.54742	0.127338	12.1521	5.58876e-34	2.35002e-32	AAEL025330				GO:0008289	lipid binding
LOC5574691	1094.83	-1.38977	0.114472	-12.1408	6.42149e-34	2.69241e-32	AAEL011321				GO:0000775,GO:0005634,GO:0005694,GO:0007049,GO:0051301	chromosome, centromeric region,nucleus,chromosome,cell cycle,cell division
LOC5574367	1829.64	2.29206	0.188854	12.1367	6.75315e-34	2.82336e-32	AAEL011085				GO:0008270	zinc ion binding
LOC5567836	1383.66	2.14393	0.176654	12.1363	6.78333e-34	2.82787e-32	AAEL001009	dab2-interacting protein [Source:VB Community Annotation]			GO:0005515,GO:0016301,GO:0016310	protein binding,kinase activity,phosphorylation
LOC110674147	106.324	-4.52135	0.372737	-12.1301	7.31165e-34	3.03944e-32	AAEL023943				GO:0007165	signal transduction
LOC5564249	4821.34	-1.11609	0.0921552	-12.111	9.23741e-34	3.82906e-32	AAEL004195	membrane associated progesterone receptor [Source:VB Community Annotation]			GO:0016020,GO:0016021	membrane,integral component of membrane
LOC5575995	5943.24	-1.37257	0.113376	-12.1063	9.77696e-34	4.04124e-32	AAEL002761	tropomyosin invertebrate [Source:VB Community Annotation]
CFI06_mgr02	181559	2.71492	0.224535	12.0913	1.17408e-33	4.83927e-32
LOC5566772	20981.9	1.19032	0.0984603	12.0893	1.20253e-33	4.94257e-32	AAEL005629	60S ribosomal protein L35, putative [Source:VB Community Annotation]	RpL7a		GO:0003735,GO:0005840,GO:0006412	structural constituent of ribosome,ribosome,translation
LOC5572673	210.63	2.73817	0.22662	12.0827	1.30402e-33	5.34464e-32	AAEL009948	aldehyde dehydrogenase [Source:VB Community Annotation]	ALDH9948	ALDH	GO:0016491,GO:0016620,GO:0055114	oxidoreductase activity,oxidoreductase activity, acting on the aldehyde or oxo group of donors, NAD or NADP as acceptor,oxidation-reduction process
LOC5577309	15283.4	1.06965	0.0885329	12.0819	1.31603e-33	5.37876e-32	AAEL019789	40S ribosomal protein S3a [Source:UniProtKB/Swiss-Prot;Acc:Q1HRR3]			GO:0003735,GO:0005737,GO:0005840,GO:0006412,GO:0022627	structural constituent of ribosome,cytoplasm,ribosome,translation,cytosolic small ribosomal subunit
LOC23687855	1035.66	-1.93627	0.16029	-12.0798	1.35091e-33	5.5059e-32	AAEL017435				GO:0005515	protein binding
LOC5568426	754.134	-2.99892	0.248375	-12.0742	1.44576e-33	5.87608e-32	AAEL006834	glutamate semialdehyde dehydrogenase [Source:VB Community Annotation]			GO:0000166,GO:0003824,GO:0004349,GO:0004350,GO:0005524,GO:0005737,GO:0005739,GO:0006561,GO:0008152,GO:0008652,GO:0016301,GO:0016310,GO:0016491,GO:0016620,GO:0016740,GO:0050661,GO:0055114,GO:0055129	nucleotide binding,catalytic activity,glutamate 5-kinase activity,glutamate-5-semialdehyde dehydrogenase activity,ATP binding,cytoplasm,mitochondrion,proline biosynthetic process,metabolic process,cellular amino acid biosynthetic process,kinase activity,phosphorylation,oxidoreductase activity,oxidoreductase activity, acting on the aldehyde or oxo group of donors, NAD or NADP as acceptor,transfera…
LOC5571818	1444.14	1.46719	0.121518	12.0739	1.45082e-33	5.88024e-32	AAEL019836				GO:0003676,GO:0003723,GO:0003729	nucleic acid binding,RNA binding,mRNA binding
LOC5564482	425.777	-2.75888	0.228699	-12.0634	1.64922e-33	6.66585e-32	AAEL014486
LOC5564323	6798.03	-1.65247	0.137162	-12.0476	1.9969e-33	8.04885e-32	AAEL000572	AMP dependent ligase [Source:UniProtKB/TrEMBL;Acc:A0A1S4EW84]			GO:0003824,GO:0016020,GO:0016021	catalytic activity,membrane,integral component of membrane
LOC23687709	469.734	2.08594	0.173201	12.0434	2.10037e-33	8.44257e-32	AAEL017289				GO:0003676	nucleic acid binding
LOC5575180	5171.69	2.58472	0.214722	12.0375	2.25686e-33	9.04666e-32	AAEL000335	lamin [Source:VB Community Annotation]			GO:0005198,GO:0005882	structural molecule activity,intermediate filament
LOC5574448	2905.18	-2.08396	0.173406	-12.0178	2.86385e-33	1.14484e-31	AAEL019907				GO:0005509,GO:0005886,GO:0007155,GO:0007156,GO:0016020,GO:0016021,GO:0098609	calcium ion binding,plasma membrane,cell adhesion,homophilic cell adhesion via plasma membrane adhesion molecules,membrane,integral component of membrane,cell-cell adhesion
LOC5573437	637.555	-2.86473	0.238394	-12.0168	2.90066e-33	1.15638e-31	AAEL010479	sugar transporter [Source:VB Community Annotation]			GO:0016020,GO:0016021,GO:0022857,GO:0055085	membrane,integral component of membrane,transmembrane transporter activity,transmembrane transport
LOC5570221	342.14	-2.47155	0.205722	-12.0141	2.99786e-33	1.19187e-31	AAEL008165
LOC5572786	2049.23	-1.25837	0.104864	-12	3.55376e-33	1.40904e-31	AAEL001887	glutamine synthetase 1, 2 (glutamate-amonia ligase) (gs) [Source:VB Community Annotation]			GO:0000166,GO:0003824,GO:0004356,GO:0005524,GO:0006542,GO:0006807,GO:0016874	nucleotide binding,catalytic activity,glutamate-ammonia ligase activity,ATP binding,glutamine biosynthetic process,nitrogen compound metabolic process,ligase activity
LOC5575495	21848.2	1.61647	0.134793	11.9922	3.9053e-33	1.54423e-31	AAEL011870	rap55 [Source:VB Community Annotation]			GO:0006397	mRNA processing
LOC5566445	1090.01	2.07841	0.173413	11.9853	4.24437e-33	1.67377e-31	AAEL005395
LOC5573621	620.936	-1.66577	0.139093	-11.976	4.74829e-33	1.86745e-31	AAEL027116				GO:0003677,GO:0003899,GO:0005634,GO:0006351,GO:0016740,GO:0016779	DNA binding,DNA-directed 5'-3' RNA polymerase activity,nucleus,transcription, DNA-templated,transferase activity,nucleotidyltransferase activity
LOC5575625	2853.5	-1.59263	0.133039	-11.9711	5.0335e-33	1.9743e-31	AAEL011949	transferrin [Source:VB Community Annotation]	Tf2		GO:0005576,GO:0005615,GO:0016020,GO:0016021	extracellular region,extracellular space,membrane,integral component of membrane
LOC5573350	335.784	2.57077	0.215097	11.9517	6.36117e-33	2.48836e-31	AAEL010444
LOC5576845	1486.07	1.83545	0.153604	11.9493	6.54909e-33	2.55502e-31	AAEL019694				GO:0005515	protein binding
LOC5565763	788.936	-2.47273	0.207147	-11.9371	7.58373e-33	2.95078e-31	AAEL018103				GO:0005319,GO:0006869,GO:0045735	lipid transporter activity,lipid transport,nutrient reservoir activity
LOC5569984	19086.8	-2.59342	0.21735	-11.932	8.06134e-33	3.12827e-31	AAEL008073				GO:0003723	RNA binding
LOC5575707	1156.1	2.42387	0.203163	11.9307	8.19035e-33	3.1699e-31	AAEL012015	DEAD box ATP-dependent RNA helicase [Source:VB Community Annotation]			GO:0000166,GO:0003676,GO:0003724,GO:0004386,GO:0005524,GO:0016787	nucleotide binding,nucleic acid binding,RNA helicase activity,helicase activity,ATP binding,hydrolase activity
LOC5568620	367.693	2.03477	0.170908	11.9057	1.10588e-32	4.26876e-31	AAEL006964				GO:0030246	carbohydrate binding
LOC5568100	1391.88	-1.13464	0.0953307	-11.9022	1.15317e-32	4.43954e-31	AAEL006539	Serine/threonine protein kinase [Source:UniProtKB/TrEMBL;Acc:A0A1S4FDS5]			GO:0000166,GO:0004672,GO:0004674,GO:0005524,GO:0006468,GO:0007165,GO:0016740	nucleotide binding,protein kinase activity,protein serine/threonine kinase activity,ATP binding,protein phosphorylation,signal transduction,transferase activity
LOC5568940	3754.67	2.2124	0.185957	11.8974	1.2212e-32	4.6891e-31	AAEL007236				GO:0008168,GO:0016740,GO:0032259	methyltransferase activity,transferase activity,methylation
LOC5575324	1526.4	-1.76256	0.14818	-11.8947	1.26044e-32	4.82706e-31	AAEL002600	serine protease [Source:VB Community Annotation]			GO:0004252,GO:0006508	serine-type endopeptidase activity,proteolysis
LOC110680362	126.131	-6.01321	0.505814	-11.8882	1.36344e-32	5.20783e-31	AAEL026577
LOC5565275	623.712	1.62168	0.136452	11.8846	1.42313e-32	5.42164e-31	AAEL026452
LOC5569701	197.061	3.08266	0.259392	11.8841	1.43108e-32	5.43773e-31	AAEL007855
LOC5573047	1607.95	-2.82686	0.237912	-11.882	1.46859e-32	5.55878e-31	AAEL010219	sugar transporter [Source:VB Community Annotation]			GO:0016020,GO:0016021,GO:0022857,GO:0055085	membrane,integral component of membrane,transmembrane transporter activity,transmembrane transport
LOC5570942	966.278	2.74806	0.231282	11.8819	1.47056e-32	5.55878e-31	AAEL008678				GO:0005515,GO:0005737,GO:0005856,GO:0005874,GO:0007049,GO:0008017,GO:0051010,GO:0051301,GO:0070507	protein binding,cytoplasm,cytoskeleton,microtubule,cell cycle,microtubule binding,microtubule plus-end binding,cell division,regulation of microtubule cytoskeleton organization
LOC5580054	2305.32	-3.74313	0.315156	-11.8771	1.55723e-32	5.87122e-31	AAEL027078				GO:0016579,GO:0036459	protein deubiquitination,thiol-dependent ubiquitinyl hydrolase activity
LOC5578271	585.074	1.69345	0.142708	11.8665	1.76632e-32	6.64238e-31	AAEL003491	proline synthetase associated protein [Source:VB Community Annotation]			GO:0030170	pyridoxal phosphate binding
LOC5574288	1695.38	-1.2503	0.105472	-11.8544	2.04255e-32	7.66142e-31	AAEL011049	condensin, XCAP-G'-subunit, putative [Source:VB Community Annotation]			GO:0000796,GO:0005694,GO:0007049,GO:0007076,GO:0030261,GO:0051301	condensin complex,chromosome,cell cycle,mitotic chromosome condensation,chromosome condensation,cell division
LOC5565118	1865.8	-2.45015	0.207153	-11.8278	2.80517e-32	1.04949e-30	AAEL014734				GO:0003824,GO:0008152,GO:0016491,GO:0033512,GO:0047130,GO:0047131,GO:0055114	catalytic activity,metabolic process,oxidoreductase activity,L-lysine catabolic process to acetyl-CoA via saccharopine,saccharopine dehydrogenase (NADP+, L-lysine-forming) activity,saccharopine dehydrogenase (NAD+, L-glutamate-forming) activity,oxidation-reduction process
LOC5566442	2937.14	-1.56165	0.132061	-11.8252	2.8929e-32	1.07955e-30	AAEL005384	phosphoribosylformylglycinamidine synthase, putative [Source:VB Community Annotation]			GO:0000166,GO:0004642,GO:0005524,GO:0006164,GO:0006189,GO:0006541,GO:0016874,GO:0046872	nucleotide binding,phosphoribosylformylglycinamidine synthase activity,ATP binding,purine nucleotide biosynthetic process,'de novo' IMP biosynthetic process,glutamine metabolic process,ligase activity,metal ion binding
LOC5565268	1507.46	-1.50928	0.127784	-11.8112	3.41768e-32	1.27213e-30	AAEL004686	RuvB-like helicase 1 (EC 3.6.4.12) (Pontin) [Source:VB Community Annotation]	pont		GO:0000166,GO:0003678,GO:0003713,GO:0004386,GO:0005524,GO:0005634,GO:0006281,GO:0006310,GO:0006325,GO:0006974,GO:0007049,GO:0016787,GO:0031011,GO:0032508,GO:0035267,GO:0042127,GO:0043139,GO:0043141,GO:0051301,GO:0090263,GO:0097255,GO:1903508	nucleotide binding,DNA helicase activity,transcription coactivator activity,helicase activity,ATP binding,nucleus,DNA repair,DNA recombination,chromatin organization,cellular response to DNA damage stimulus,cell cycle,hydrolase activity,Ino80 complex,DNA duplex unwinding,NuA4 histone acetyltransferase complex,regulation of cell population proliferation,5'-3' DNA helicase activity,GO_0043141,cell …
LOC5578458	222.136	-2.90273	0.245981	-11.8006	3.87432e-32	1.43843e-30	AAEL000523	ring finger protein [Source:VB Community Annotation]			GO:0046872	metal ion binding
LOC5572994	616.778	-1.98408	0.168278	-11.7905	4.37098e-32	1.6187e-30	AAEL001937	selenium-binding protein [Source:VB Community Annotation]			GO:0008430	selenium binding
LOC5576646	343.493	2.14704	0.182421	11.7697	5.59456e-32	2.06659e-30	AAEL021805				GO:0004842,GO:0016567,GO:0046872	ubiquitin-protein transferase activity,protein ubiquitination,metal ion binding
LOC5575668	1514.41	-1.59769	0.135776	-11.7671	5.7672e-32	2.12498e-30	AAEL002687	sterol carrier protein-2, putative [Source:VB Community Annotation]			GO:0003824,GO:0005737,GO:0005739,GO:0005777,GO:0006869,GO:0008289,GO:0016740,GO:0016746,GO:0016747,GO:0033814,GO:0050632	catalytic activity,cytoplasm,mitochondrion,peroxisome,lipid transport,lipid binding,transferase activity,transferase activity, transferring acyl groups,transferase activity, transferring acyl groups other than amino-acyl groups,propanoyl-CoA C-acyltransferase activity,propionyl-CoA C2-trimethyltridecanoyltransferase activity
LOC5564696	436.254	2.81176	0.238992	11.7651	5.90516e-32	2.17033e-30	AAEL004396	GPCR Octopamine/Tyramine Family [Source:VB Community Annotation]	GPROAR4		GO:0004930,GO:0007165,GO:0007186,GO:0016020,GO:0016021	G protein-coupled receptor activity,signal transduction,G protein-coupled receptor signaling pathway,membrane,integral component of membrane
LOC5576496	1178.72	-2.45575	0.208752	-11.7639	5.98753e-32	2.19508e-30	AAEL002907				GO:0006629	lipid metabolic process
LOC5579064	1437	3.85694	0.327961	11.7603	6.2484e-32	2.28497e-30	AAEL024562
LOC5575684	440.053	1.67356	0.14242	11.7509	6.99036e-32	2.54991e-30	AAEL011995				GO:0005623,GO:0016020,GO:0016021,GO:0045454	obsolete cell,membrane,integral component of membrane,cell redox homeostasis
LOC5564711	1090.5	-2.96901	0.252886	-11.7405	7.89888e-32	2.87413e-30	AAEL014579	trypsin, putative [Source:VB Community Annotation]			GO:0004252,GO:0006508,GO:0016020,GO:0016021	serine-type endopeptidase activity,proteolysis,membrane,integral component of membrane
LOC5567695	3135.81	2.66838	0.22729	11.74	7.94783e-32	2.88475e-30	AAEL006271	copper-zinc (Cu-Zn) superoxide dismutase [Source:VB Community Annotation]	CUSOD2		GO:0004784,GO:0006801,GO:0016209,GO:0016491,GO:0019430,GO:0046872,GO:0055114,GO:0098869	superoxide dismutase activity,superoxide metabolic process,antioxidant activity,oxidoreductase activity,removal of superoxide radicals,metal ion binding,oxidation-reduction process,cellular oxidant detoxification
LOC5566360	131.538	3.34308	0.285361	11.7153	1.06466e-31	3.85472e-30	AAEL023417				GO:0005634	nucleus
LOC110674250	110.486	-4.1756	0.356615	-11.709	1.14634e-31	4.14014e-30	AAEL020427				GO:0003677,GO:0006355,GO:0043565	DNA binding,regulation of transcription, DNA-templated,sequence-specific DNA binding
LOC5579338	515.818	-3.17973	0.271802	-11.6987	1.29417e-31	4.66253e-30	AAEL025607				GO:0007155,GO:0007229,GO:0008305,GO:0016020,GO:0016021	cell adhesion,integrin-mediated signaling pathway,integrin complex,membrane,integral component of membrane
LOC23687980	1251.99	-1.80807	0.154593	-11.6957	1.34121e-31	4.8201e-30	AAEL017560				GO:0005515	protein binding
LOC5565350	1851.49	-2.85372	0.244007	-11.6952	1.34799e-31	4.83257e-30	AAEL004741	aquaporin transporter [Source:VB Community Annotation]			GO:0015267,GO:0016020,GO:0016021,GO:0055085	channel activity,membrane,integral component of membrane,transmembrane transport
LOC5567468	963.458	2.54585	0.217901	11.6835	1.548e-31	5.53601e-30	AAEL000956				GO:0005829,GO:0016020,GO:0035091,GO:0042147	cytosol,membrane,phosphatidylinositol binding,retrograde transport, endosome to Golgi
LOC5568557	182.513	2.28076	0.195317	11.6772	1.66635e-31	5.94467e-30	AAEL001128	AMP dependent coa ligase [Source:VB Community Annotation]			GO:0003824,GO:0016874	catalytic activity,ligase activity
LOC5574799	1132.15	1.61321	0.138221	11.6712	1.78955e-31	6.3686e-30	AAEL002487	P53 regulated pa26 nuclear protein sestrin [Source:VB Community Annotation]			GO:0005634,GO:0005737,GO:1901031	nucleus,cytoplasm,regulation of response to reactive oxygen species
LOC5568414	2231.69	2.63976	0.226183	11.6709	1.79425e-31	6.36981e-30	AAEL006830	yellow protein precursor [Source:VB Community Annotation]			GO:0042438,GO:0060179	melanin biosynthetic process,male mating behavior
LOC110679706	382.608	2.46931	0.211648	11.6671	1.87763e-31	6.64609e-30	AAEL026331
LOC5570991	11192.3	-2.27205	0.194743	-11.6669	1.88118e-31	6.64609e-30	AAEL008722				GO:0003676,GO:0046872	nucleic acid binding,metal ion binding
LOC5572940	3388.99	2.8851	0.247351	11.664	1.94741e-31	6.86345e-30	AAEL019583				GO:0003676,GO:0003723,GO:0005515,GO:0007275	nucleic acid binding,RNA binding,protein binding,multicellular organism development
LOC5565293	1007.05	-2.51569	0.216057	-11.6436	2.47324e-31	8.69568e-30	AAEL010487				GO:0016020,GO:0016021	membrane,integral component of membrane
LOC5567583	1834.58	-1.22804	0.105537	-11.6362	2.69876e-31	9.4487e-30	AAEL006187	translational activator gcn1 [Source:VB Community Annotation]			GO:0006417,GO:0019887,GO:0019901,GO:0033674,GO:0043022,GO:0045859	regulation of translation,protein kinase regulator activity,protein kinase binding,positive regulation of kinase activity,ribosome binding,regulation of protein kinase activity
LOC5568287	653.252	2.18724	0.18797	11.6361	2.70037e-31	9.4487e-30	AAEL006720				GO:0005634	nucleus
CFI06_mgt19	1460.87	3.14534	0.27103	11.6052	3.88004e-31	1.35439e-29
LOC5565483	405.664	2.16863	0.187063	11.593	4.47049e-31	1.55677e-29	AAEL004821	potassium-dependent sodium-calcium exchanger, putative [Source:VB Community Annotation]			GO:0006816,GO:0015297,GO:0016020,GO:0016021,GO:0055085	calcium ion transport,antiporter activity,membrane,integral component of membrane,transmembrane transport
LOC5570558	2642.91	2.58183	0.222775	11.5894	4.66259e-31	1.61981e-29	AAEL008364	Serine Protease Inhibitor (serpin) likely cleavage at S/S. [Source:VB Community Annotation]	SRPN9		GO:0004867,GO:0005615,GO:0010466,GO:0010951,GO:0030414	serine-type endopeptidase inhibitor activity,extracellular space,negative regulation of peptidase activity,negative regulation of endopeptidase activity,peptidase inhibitor activity
LOC5575798	170.507	-2.99304	0.258311	-11.5869	4.79931e-31	1.66334e-29	AAEL012077	NAD dehydrogenase [Source:VB Community Annotation]			GO:0005515,GO:0016491,GO:0055114	protein binding,oxidoreductase activity,oxidation-reduction process
LOC5575560	224.095	-3.15418	0.272233	-11.5863	4.83568e-31	1.67198e-29	AAEL002673	elongase, putative [Source:VB Community Annotation]			GO:0006629,GO:0006631,GO:0006633,GO:0016020,GO:0016021,GO:0016740,GO:0102336,GO:0102337,GO:0102338,GO:0102756	lipid metabolic process,fatty acid metabolic process,fatty acid biosynthetic process,membrane,integral component of membrane,transferase activity,3-oxo-arachidoyl-CoA synthase activity,3-oxo-cerotoyl-CoA synthase activity,3-oxo-lignoceronyl-CoA synthase activity,very-long-chain 3-ketoacyl-CoA synthase activity
LOC110681384	138.094	2.84113	0.245271	11.5836	4.98812e-31	1.72061e-29	AAEL023315
LOC5571749	115.906	-4.2578	0.368019	-11.5695	5.88064e-31	2.02369e-29	AAEL009271	testin [Source:VB Community Annotation]			GO:0005737,GO:0008270,GO:0046872	cytoplasm,zinc ion binding,metal ion binding
LOC5573184	189.092	2.85498	0.246844	11.5659	6.13398e-31	2.1059e-29	AAEL001976	cAMP-dependent protein kinase catalytic subunit [Source:VB Community Annotation]			GO:0000166,GO:0004672,GO:0004674,GO:0005524,GO:0006468,GO:0016301,GO:0016310,GO:0016740	nucleotide binding,protein kinase activity,protein serine/threonine kinase activity,ATP binding,protein phosphorylation,kinase activity,phosphorylation,transferase activity
LOC5567275	1255.5	2.73101	0.236444	11.5504	7.35065e-31	2.51768e-29	AAEL005938				GO:0003676	nucleic acid binding
LOC110680251	131.564	3.34131	0.289464	11.5431	7.99916e-31	2.73339e-29	AAEL023417
LOC5576802	535.177	1.70701	0.147898	11.5418	8.12262e-31	2.76909e-29	AAEL018249				GO:0004177,GO:0006508,GO:0008233,GO:0008237,GO:0008270,GO:0016787,GO:0046872	aminopeptidase activity,proteolysis,peptidase activity,metallopeptidase activity,zinc ion binding,hydrolase activity,metal ion binding
LOC5570005	176.371	-2.8184	0.244307	-11.5363	8.65462e-31	2.94358e-29	AAEL000188	elongase, putative [Source:VB Community Annotation]			GO:0006629,GO:0006631,GO:0006633,GO:0016020,GO:0016021,GO:0016740,GO:0102336,GO:0102337,GO:0102338,GO:0102756	lipid metabolic process,fatty acid metabolic process,fatty acid biosynthetic process,membrane,integral component of membrane,transferase activity,3-oxo-arachidoyl-CoA synthase activity,3-oxo-cerotoyl-CoA synthase activity,3-oxo-lignoceronyl-CoA synthase activity,very-long-chain 3-ketoacyl-CoA synthase activity
LOC5574828	943.168	1.72135	0.149246	11.5336	8.93414e-31	3.03158e-29	AAEL011441	calcium/calmodulin-dependent protein kinase type 1 (camki) [Source:VB Community Annotation]			GO:0000166,GO:0004672,GO:0004674,GO:0005524,GO:0006468	nucleotide binding,protein kinase activity,protein serine/threonine kinase activity,ATP binding,protein phosphorylation
LOC5579180	987.047	2.10317	0.182411	11.5298	9.33103e-31	3.15891e-29	AAEL003896	serine/threonine protein kinase [Source:VB Community Annotation]			GO:0000166,GO:0004672,GO:0005524,GO:0006468	nucleotide binding,protein kinase activity,ATP binding,protein phosphorylation
LOC110680285	505.904	-2.83435	0.246018	-11.5209	1.03503e-30	3.49585e-29	AAEL026175				GO:0005319,GO:0006869	lipid transporter activity,lipid transport
LOC23687495	17315.5	-1.13567	0.0985802	-11.5203	1.04301e-30	3.51466e-29	AAEL017075				GO:0005730,GO:0046872	nucleolus,metal ion binding
LOC5573732	14631.2	-1.11805	0.097058	-11.5194	1.05318e-30	3.54079e-29	AAEL000291	V-type proton ATPase 16 kDa proteolipid subunit [Source:UniProtKB/Swiss-Prot;Acc:O16110]			GO:0005773,GO:0005774,GO:0006811,GO:0015078,GO:0015991,GO:0016020,GO:0016021,GO:0033177,GO:0033179,GO:1902600	vacuole,vacuolar membrane,ion transport,proton transmembrane transporter activity,GO_0015991,membrane,integral component of membrane,proton-transporting two-sector ATPase complex, proton-transporting domain,proton-transporting V-type ATPase, V0 domain,proton transmembrane transport
LOC5570592	1633.19	-1.44911	0.125804	-11.5188	1.06094e-30	3.55865e-29	AAEL008403				GO:0005515	protein binding
LOC5568051	3703.85	-2.28155	0.198164	-11.5134	1.12903e-30	3.77837e-29	AAEL006492	centrin, putative [Source:VB Community Annotation]			GO:0005509	calcium ion binding
LOC5575090	3266.05	-3.42298	0.297359	-11.5112	1.1579e-30	3.86612e-29	AAEL011643	homothorax homeobox protein [Source:VB Community Annotation]
LOC5569724	11935.9	-1.15865	0.100687	-11.5074	1.21023e-30	4.02856e-29	AAEL007880	ornithine decarboxylase [Source:VB Community Annotation]			GO:0003824,GO:0006596	catalytic activity,polyamine biosynthetic process
LOC5574331	320.027	1.99106	0.173026	11.5073	1.21207e-30	4.02856e-29	AAEL002331	Mannose-6-phosphate isomerase [Source:UniProtKB/TrEMBL;Acc:Q17IJ3]			GO:0004476,GO:0005975,GO:0008270,GO:0009298,GO:0016853,GO:0046872	mannose-6-phosphate isomerase activity,carbohydrate metabolic process,zinc ion binding,GDP-mannose biosynthetic process,isomerase activity,metal ion binding
LOC110679049	11936.3	-1.15872	0.100702	-11.5065	1.22384e-30	4.0584e-29	AAEL024196
LOC5566725	1239.83	2.09153	0.181847	11.5016	1.29506e-30	4.28486e-29	AAEL005617	UTP-glucose-1-phosphate uridylyltransferase 2 [Source:VB Community Annotation]			GO:0003983,GO:0006011,GO:0016740,GO:0016779,GO:0070569	UTP:glucose-1-phosphate uridylyltransferase activity,UDP-glucose metabolic process,transferase activity,nucleotidyltransferase activity,uridylyltransferase activity
LOC5571262	3110.17	-1.07469	0.0934499	-11.5002	1.31575e-30	4.34347e-29	AAEL001569
LOC5566598	2636.09	3.45282	0.300267	11.4992	1.33183e-30	4.38664e-29	AAEL000776				GO:0008270,GO:0046872	zinc ion binding,metal ion binding
LOC5576483	1063.32	2.33676	0.203348	11.4914	1.45699e-30	4.78806e-29	AAEL002898				GO:0006729,GO:0008124,GO:0016829	tetrahydrobiopterin biosynthetic process,4-alpha-hydroxytetrahydrobiopterin dehydratase activity,lyase activity
LOC5566917	158.117	-4.62425	0.402464	-11.4899	1.48355e-30	4.86439e-29	AAEL005692				GO:0004725,GO:0006470,GO:0016020,GO:0016021,GO:0016311,GO:0016791,GO:0030054,GO:0030141,GO:0030658,GO:0031410,GO:0035335,GO:0035773,GO:0045202	protein tyrosine phosphatase activity,protein dephosphorylation,membrane,integral component of membrane,dephosphorylation,phosphatase activity,cell junction,secretory granule,transport vesicle membrane,cytoplasmic vesicle,peptidyl-tyrosine dephosphorylation,insulin secretion involved in cellular response to glucose stimulus,synapse
LOC5578680	888.139	-2.77214	0.241428	-11.4822	1.62018e-30	5.30045e-29	AAEL003622	delta(9)-desaturase, putative [Source:VB Community Annotation]			GO:0006629,GO:0006633,GO:0016020,GO:0016021,GO:0016491,GO:0016717,GO:0055114	lipid metabolic process,fatty acid biosynthetic process,membrane,integral component of membrane,oxidoreductase activity,oxidoreductase activity, acting on paired donors, with oxidation of a pair of donors resulting in the reduction of molecular oxygen to two molecules of water,oxidation-reduction process
LOC5569275	118.03	-3.07259	0.267755	-11.4754	1.75461e-30	5.72742e-29	AAEL007531
LOC5568129	124.768	3.07249	0.267921	11.4679	1.91252e-30	6.21505e-29	AAEL006570				GO:0016020,GO:0016021	membrane,integral component of membrane
LOC5568774	124.768	3.07249	0.267921	11.4679	1.91252e-30	6.21505e-29	AAEL015457				GO:0016020,GO:0016021	membrane,integral component of membrane
LOC5573959	1533.23	-1.57158	0.137132	-11.4603	2.08804e-30	6.77035e-29	AAEL025216				GO:0005096,GO:0005515,GO:0043547,GO:0051056	GTPase activator activity,protein binding,positive regulation of GTPase activity,regulation of small GTPase mediated signal transduction
LOC5578857	4788.22	-2.59542	0.226516	-11.458	2.14325e-30	6.93396e-29	AAEL027402				GO:0005515	protein binding
LOC5568717	12983.3	-1.05759	0.0923774	-11.4486	2.3889e-30	7.7116e-29	AAEL007043				GO:0003677	DNA binding
LOC5567579	137.405	-2.67959	0.234072	-11.4477	2.41431e-30	7.77643e-29	AAEL006178
LOC5580209	1603.58	-1.50695	0.131644	-11.4472	2.42853e-30	7.805e-29	AAEL011927	mind bomb [Source:VB Community Annotation]			GO:0004842,GO:0005515,GO:0005737,GO:0007219,GO:0008270,GO:0016567,GO:0016740,GO:0046872	ubiquitin-protein transferase activity,protein binding,cytoplasm,Notch signaling pathway,zinc ion binding,protein ubiquitination,transferase activity,metal ion binding
LOC110676794	267.195	2.92505	0.255811	11.4344	2.81325e-30	9.02157e-29	AAEL027148				GO:0003676	nucleic acid binding
LOC5579861	268.41	-3.24941	0.284215	-11.433	2.86167e-30	9.15672e-29	AAEL005979	Class B Scavenger Receptor (CD36 domain). [Source:VB Community Annotation]	SCRB3		GO:0005886,GO:0016020,GO:0016021	plasma membrane,membrane,integral component of membrane
LOC5566424	1220.82	2.37562	0.208128	11.4142	3.55118e-30	1.13381e-28	AAEL005383	Adenosine monophosphate-protein transferase FICD homolog (EC 2.7.7.n1) [Source:VB Community Annotation]			GO:0000166,GO:0005515,GO:0005524,GO:0016020,GO:0016021,GO:0016740,GO:0016779,GO:0016787,GO:0018117,GO:0070733	nucleotide binding,protein binding,ATP binding,membrane,integral component of membrane,transferase activity,nucleotidyltransferase activity,hydrolase activity,protein adenylylation,protein adenylyltransferase activity
LOC5567358	1033.3	2.40726	0.21098	11.4099	3.73138e-30	1.18875e-28	AAEL006023	Vanin-like protein 1 precursor, putative [Source:VB Community Annotation]			GO:0006807,GO:0016020,GO:0016021,GO:0016787,GO:0016811	nitrogen compound metabolic process,membrane,integral component of membrane,hydrolase activity,hydrolase activity, acting on carbon-nitrogen (but not peptide) bonds, in linear amides
LOC5572713	256.744	2.16237	0.189585	11.4058	3.9123e-30	1.24367e-28	AAEL023488				GO:0005515	protein binding
LOC5577338	6270.41	2.34571	0.205722	11.4023	4.0703e-30	1.29108e-28	AAEL000442	protein oskar [Source:VB Community Annotation]	osk
LOC5568047	221.042	2.82857	0.248078	11.4019	4.08893e-30	1.29418e-28	AAEL006486				GO:0016020,GO:0016021	membrane,integral component of membrane
LOC5567844	594.474	1.97966	0.173635	11.4013	4.11995e-30	1.30117e-28	AAEL000980				GO:0003676,GO:0005634,GO:0008270,GO:0046872	nucleic acid binding,nucleus,zinc ion binding,metal ion binding
LOC23687757	200.633	2.22648	0.195801	11.3712	5.82068e-30	1.83433e-28	AAEL023894				GO:0016491,GO:0055114	oxidoreductase activity,oxidation-reduction process
LOC5565208	684.472	-2.02115	0.177789	-11.3683	6.01541e-30	1.89161e-28	AAEL019898
LOC5570230	1204.86	2.40671	0.211851	11.3604	6.58624e-30	2.06666e-28	AAEL008152	short-chain dehydrogenase [Source:VB Community Annotation]			GO:0016491,GO:0055114	oxidoreductase activity,oxidation-reduction process
LOC5567220	317.68	3.06358	0.269879	11.3517	7.27372e-30	2.27749e-28	AAEL000898				GO:0016787,GO:0052689	hydrolase activity,carboxylic ester hydrolase activity
LOC5573177	2179.96	1.92933	0.170004	11.3488	7.52127e-30	2.34995e-28	AAEL002036
LOC5570737	844.776	2.63461	0.232194	11.3466	7.71023e-30	2.40311e-28	AAEL008510	sphingosine kinase a, b [Source:VB Community Annotation]			GO:0003951,GO:0016301,GO:0016310	NAD+ kinase activity,kinase activity,phosphorylation
LOC5578093	2327.92	-1.2282	0.108245	-11.3464	7.72433e-30	2.40311e-28	AAEL003449	structural maintenance of chromosomes 2 smc2 [Source:VB Community Annotation]			GO:0005515,GO:0005524,GO:0005634,GO:0005694,GO:0030261,GO:0051276	protein binding,ATP binding,nucleus,chromosome,chromosome condensation,chromosome organization
LOC5564787	514.608	2.12312	0.187127	11.3459	7.77338e-30	2.41322e-28	AAEL004435	kynurenine aminotransferase [Source:VB Community Annotation]			GO:0003824,GO:0006520,GO:0008483,GO:0009058,GO:0016212,GO:0016740,GO:0030170,GO:0036137,GO:0047315,GO:0047804,GO:0070189,GO:0097052	catalytic activity,cellular amino acid metabolic process,transaminase activity,biosynthetic process,kynurenine-oxoglutarate transaminase activity,transferase activity,pyridoxal phosphate binding,kynurenine aminotransferase activity,kynurenine-glyoxylate transaminase activity,cysteine-S-conjugate beta-lyase activity,kynurenine metabolic process,L-kynurenine metabolic process
LOC5568007	688.595	1.85189	0.163235	11.3449	7.85975e-30	2.43485e-28	AAEL006446	trehalose-6-phosphate synthase [Source:VB Community Annotation]			GO:0003824,GO:0005992	catalytic activity,trehalose biosynthetic process
LOC110681189	240.117	2.10029	0.185584	11.3172	1.0789e-29	3.33522e-28	AAEL021624
LOC5567900	567.939	-2.60297	0.230018	-11.3164	1.08909e-29	3.3596e-28	AAEL006355	Class C Scavenger Receptor (Sushi/SCR/CCP MAM and Somatomedin B domains). [Source:VB Community Annotation]	SCRC1		GO:0016020	membrane
LOC110678198	3193.96	1.15511	0.102124	11.3109	1.15891e-29	3.56743e-28	AAEL028178				GO:0003735,GO:0005840,GO:0006412,GO:0015935	structural constituent of ribosome,ribosome,translation,small ribosomal subunit
LOC5571026	354.91	1.72848	0.152827	11.31	1.17049e-29	3.59549e-28	AAEL008758	F-box/SPRY domain-containing protein 1 [Source:VB Community Annotation]			GO:0005515,GO:0007274,GO:0007399,GO:0016567,GO:0030054,GO:0031594,GO:0045202,GO:0045886	protein binding,neuromuscular synaptic transmission,nervous system development,protein ubiquitination,cell junction,neuromuscular junction,synapse,negative regulation of synaptic growth at neuromuscular junction
LOC5574129	234.792	-3.23267	0.28594	-11.3054	1.234e-29	3.78264e-28	AAEL010956				GO:0016020,GO:0016021,GO:0019991	membrane,integral component of membrane,septate junction assembly
LOC110676811	333.001	8.38839	0.742452	11.2982	1.33896e-29	4.09575e-28	AAEL020578
LOC5579031	4098.58	-2.85137	0.252419	-11.2962	1.37035e-29	4.18299e-28	AAEL013971				GO:0016020,GO:0016021,GO:0016747	membrane,integral component of membrane,transferase activity, transferring acyl groups other than amino-acyl groups
LOC5572005	2888.1	-1.81646	0.160833	-11.2941	1.40387e-29	4.27637e-28	AAEL009475	carbamoyl-phosphate synthase large chain [Source:VB Community Annotation]			GO:0000166,GO:0003824,GO:0004070,GO:0004088,GO:0004151,GO:0005524,GO:0006207,GO:0006221,GO:0006520,GO:0006541,GO:0006807,GO:0008152,GO:0016597,GO:0016740,GO:0016743,GO:0016787,GO:0016810,GO:0016812,GO:0016874,GO:0044205,GO:0046872	nucleotide binding,catalytic activity,aspartate carbamoyltransferase activity,carbamoyl-phosphate synthase (glutamine-hydrolyzing) activity,dihydroorotase activity,ATP binding,'de novo' pyrimidine nucleobase biosynthetic process,pyrimidine nucleotide biosynthetic process,cellular amino acid metabolic process,glutamine metabolic process,nitrogen compound metabolic process,metabolic process,amino a…
LOC5573671	336.477	1.68406	0.149292	11.2803	1.6411e-29	4.98862e-28	AAEL010679	monocyte to macrophage differentiation protein [Source:VB Community Annotation]			GO:0016020,GO:0016021,GO:0019835	membrane,integral component of membrane,cytolysis
LOC5574712	1228.83	-2.61157	0.231885	-11.2623	2.0135e-29	6.1024e-28	AAEL011345				GO:0016020,GO:0016021	membrane,integral component of membrane
LOC110676042	17271.5	-1.82864	0.162369	-11.2622	2.01587e-29	6.1024e-28	AAEL027928				GO:0046872	metal ion binding
LOC5575706	1375.22	-2.60663	0.231683	-11.2509	2.29321e-29	6.92759e-28	AAEL012014	L-lactate dehydrogenase [Source:UniProtKB/TrEMBL;Acc:Q16ND1]			GO:0003824,GO:0004459,GO:0005737,GO:0005975,GO:0016491,GO:0016616,GO:0019752,GO:0055114	catalytic activity,L-lactate dehydrogenase activity,cytoplasm,carbohydrate metabolic process,oxidoreductase activity,oxidoreductase activity, acting on the CH-OH group of donors, NAD or NADP as acceptor,carboxylic acid metabolic process,oxidation-reduction process
LOC5578728	943.357	-2.56392	0.227891	-11.2507	2.29853e-29	6.92932e-28	AAEL013840				GO:0007165,GO:0008083,GO:0016020	signal transduction,growth factor activity,membrane
LOC5573684	17240.4	-1.82635	0.162468	-11.2413	2.55563e-29	7.6885e-28	AAEL010660	alpha-B-crystallin, putative [Source:VB Community Annotation]			GO:0046872	metal ion binding
LOC23687871	2341.32	3.45505	0.307553	11.234	2.77615e-29	8.33473e-28	AAEL017451	Angiotensin-converting enzyme [Source:UniProtKB/TrEMBL;Acc:J9HF68]			GO:0004180,GO:0006508,GO:0008233,GO:0008237,GO:0008241,GO:0016020,GO:0016787,GO:0046872	carboxypeptidase activity,proteolysis,peptidase activity,metallopeptidase activity,peptidyl-dipeptidase activity,membrane,hydrolase activity,metal ion binding
LOC5570305	362.391	2.12415	0.189168	11.2289	2.94088e-29	8.81116e-28	AAEL008256	cyclin A3, putative [Source:VB Community Annotation]			GO:0005634,GO:0042025	nucleus,host cell nucleus
LOC110675562	280.942	2.07921	0.185173	11.2285	2.9552e-29	8.83593e-28	AAEL027087				GO:0016274,GO:0018216	protein-arginine N-methyltransferase activity,peptidyl-arginine methylation
LOC110676197	412.351	-4.14379	0.369054	-11.2281	2.96637e-29	8.85117e-28	AAEL024221
LOC5576357	645.545	1.53581	0.136913	11.2174	3.35057e-29	9.97717e-28	AAEL002856
LOC5575942	14383.9	2.5749	0.22963	11.2132	3.5109e-29	1.04333e-27	AAEL024914	Putative synaptic vesicle transporter svop [Source:UniProtKB/TrEMBL;Acc:A0A0P6IYS1]			GO:0016020,GO:0016021,GO:0022857,GO:0055085	membrane,integral component of membrane,transmembrane transporter activity,transmembrane transport
LOC5580174	516.004	-1.3975	0.124703	-11.2066	3.78431e-29	1.12229e-27	AAEL002559				GO:0006801,GO:0016020,GO:0016021,GO:0046872	superoxide metabolic process,membrane,integral component of membrane,metal ion binding
LOC5568238	2583.99	-1.7581	0.156928	-11.2032	3.93152e-29	1.16359e-27	AAEL006669	GPCR Frizzled/Smoothened Family [Source:VB Community Annotation]	GPRSMO		GO:0004888,GO:0004930,GO:0005515,GO:0007165,GO:0007166,GO:0007186,GO:0007224,GO:0007275,GO:0016020,GO:0016021	transmembrane signaling receptor activity,G protein-coupled receptor activity,protein binding,signal transduction,cell surface receptor signaling pathway,G protein-coupled receptor signaling pathway,smoothened signaling pathway,multicellular organism development,membrane,integral component of membrane
LOC5570119	691.479	2.09231	0.186954	11.1916	4.48464e-29	1.3246e-27	AAEL008095				GO:0005525	GTP binding
LOC5577462	754.058	2.43802	0.217856	11.1909	4.51569e-29	1.33108e-27	AAEL013211				GO:0000166,GO:0004371,GO:0005524,GO:0006071,GO:0016301,GO:0016310,GO:0016740,GO:0034012	nucleotide binding,glycerone kinase activity,ATP binding,glycerol metabolic process,kinase activity,phosphorylation,transferase activity,FAD-AMP lyase (cyclizing) activity
LOC5574404	36042.4	-1.71305	0.153114	-11.1881	4.66122e-29	1.37121e-27	AAEL011116	14-3-3 protein sigma, gamma, zeta, beta/alpha [Source:UniProtKB/TrEMBL;Acc:Q16QZ7]			GO:0019904	protein domain specific binding
LOC5564863	340.507	2.96935	0.265619	11.179	5.16808e-29	1.51725e-27	AAEL026837				GO:0016020,GO:0016021,GO:0022857,GO:0055085	membrane,integral component of membrane,transmembrane transporter activity,transmembrane transport
LOC5574999	201.339	-3.29761	0.295011	-11.1779	5.23021e-29	1.53241e-27	AAEL002520	apolipoprotein D, putative [Source:VB Community Annotation]			GO:0009507,GO:0046422,GO:0055114	chloroplast,violaxanthin de-epoxidase activity,oxidation-reduction process
LOC110680825	1670.45	-1.28093	0.114693	-11.1684	5.8231e-29	1.7027e-27	AAEL022058				GO:0005198,GO:0005737,GO:0005886,GO:0005912,GO:0007155,GO:0015629,GO:0016020,GO:0030054,GO:0045296,GO:0051015	structural molecule activity,cytoplasm,plasma membrane,adherens junction,cell adhesion,actin cytoskeleton,membrane,cell junction,cadherin binding,actin filament binding
LOC5574835	1741.23	-2.00897	0.179886	-11.168	5.84615e-29	1.70602e-27	AAEL011436	myosin xv [Source:VB Community Annotation]			GO:0000166,GO:0003774,GO:0003779,GO:0005515,GO:0005524,GO:0005737,GO:0005856,GO:0007605,GO:0016459	nucleotide binding,motor activity,actin binding,protein binding,ATP binding,cytoplasm,cytoskeleton,sensory perception of sound,myosin complex
LOC5565767	4147.29	1.90283	0.170486	11.1612	6.31508e-29	1.83919e-27	AAEL004976
LOC23687721	467.485	2.91255	0.261047	11.1572	6.60702e-29	1.92038e-27	AAEL017301	Elongation factor 1-alpha [Source:UniProtKB/TrEMBL;Acc:J9HYQ9]			GO:0000166,GO:0003746,GO:0003924,GO:0005525,GO:0005737,GO:0006412,GO:0006414	nucleotide binding,translation elongation factor activity,GTPase activity,GTP binding,cytoplasm,translation,translational elongation
LOC110674115	470.648	-2.31327	0.207352	-11.1563	6.67446e-29	1.93612e-27	AAEL024316
LOC5569982	1176	-1.78887	0.160422	-11.151	7.08243e-29	2.05039e-27	AAEL008063				GO:0005634,GO:0006355,GO:0031213,GO:0046872	nucleus,regulation of transcription, DNA-templated,RSF complex,metal ion binding
LOC5577415	1615.22	2.4543	0.220225	11.1445	7.61581e-29	2.20044e-27	AAEL003162	formin 1,2/cappuccino [Source:VB Community Annotation]			GO:0005884,GO:0008017,GO:0045010	actin filament,microtubule binding,actin nucleation
LOC5578485	1144.44	1.27739	0.114882	11.1192	1.01183e-28	2.9177e-27	AAEL027054				GO:0005634,GO:0007275	nucleus,multicellular organism development
LOC110680199	595.95	1.99372	0.179355	11.116	1.04812e-28	3.01639e-27	AAEL024807
LOC5571852	1586.88	-1.09647	0.0986795	-11.1114	1.1043e-28	3.17181e-27	AAEL009339	activin receptor type I, putative [Source:VB Community Annotation]			GO:0000166,GO:0004672,GO:0004675,GO:0005524,GO:0006468,GO:0007178,GO:0016020,GO:0016021,GO:0016301,GO:0016310,GO:0016740	nucleotide binding,protein kinase activity,transmembrane receptor protein serine/threonine kinase activity,ATP binding,protein phosphorylation,transmembrane receptor protein serine/threonine kinase signaling pathway,membrane,integral component of membrane,kinase activity,phosphorylation,transferase activity
LOC5569428	338.992	2.45859	0.221369	11.1063	1.16937e-28	3.35212e-27	AAEL007632	myosin light chain kinase [Source:VB Community Annotation]			GO:0000166,GO:0004672,GO:0004674,GO:0005524,GO:0006468	nucleotide binding,protein kinase activity,protein serine/threonine kinase activity,ATP binding,protein phosphorylation
LOC5578584	112.88	-5.70921	0.51411	-11.105	1.18572e-28	3.39233e-27	AAEL013770	zinc finger protein [Source:VB Community Annotation]			GO:0003676,GO:0005515,GO:0005634	nucleic acid binding,protein binding,nucleus
LOC5572588	713.486	1.21196	0.109184	11.1002	1.25195e-28	3.57481e-27	AAEL009916				GO:0003676,GO:0005634,GO:0008270,GO:0046872	nucleic acid binding,nucleus,zinc ion binding,metal ion binding
LOC5566868	863.052	3.39288	0.305805	11.0949	1.32786e-28	3.78414e-27	AAEL000800	microsomal dipeptidase [Source:VB Community Annotation]			GO:0006508,GO:0008233,GO:0008235,GO:0008237,GO:0008239,GO:0016020,GO:0016787,GO:0016805,GO:0031225,GO:0046872,GO:0070573	proteolysis,peptidase activity,metalloexopeptidase activity,metallopeptidase activity,dipeptidyl-peptidase activity,membrane,hydrolase activity,dipeptidase activity,anchored component of membrane,metal ion binding,metallodipeptidase activity
LOC110675241	104.145	-4.86029	0.438105	-11.0939	1.34323e-28	3.82047e-27	AAEL020558				GO:0005506,GO:0016705,GO:0020037,GO:0055114	iron ion binding,oxidoreductase activity, acting on paired donors, with incorporation or reduction of molecular oxygen,heme binding,oxidation-reduction process
LOC5576972	231.656	-2.85554	0.257428	-11.0926	1.36326e-28	3.86992e-27	AAEL003076	glucosyl/glucuronosyl transferases [Source:VB Community Annotation]			GO:0008194,GO:0016020,GO:0016021,GO:0016740,GO:0016757,GO:0016758	UDP-glycosyltransferase activity,membrane,integral component of membrane,transferase activity,transferase activity, transferring glycosyl groups,transferase activity, transferring hexosyl groups
LOC5567452	380.583	1.77942	0.160445	11.0906	1.39412e-28	3.94982e-27	AAEL000961				GO:0046872	metal ion binding
LOC5569504	2119.46	-1.47863	0.133333	-11.0898	1.4064e-28	3.97691e-27	AAEL018144				GO:0004672,GO:0005524,GO:0006468	protein kinase activity,ATP binding,protein phosphorylation
LOC110675554	160.747	3.10217	0.279862	11.0846	1.48965e-28	4.20415e-27	AAEL025499
LOC5568897	91.6344	-3.79142	0.3421	-11.0828	1.52077e-28	4.28369e-27	AAEL026878				GO:0006629,GO:0006633,GO:0016020,GO:0016021,GO:0016491,GO:0016717,GO:0055114	lipid metabolic process,fatty acid biosynthetic process,membrane,integral component of membrane,oxidoreductase activity,oxidoreductase activity, acting on paired donors, with oxidation of a pair of donors resulting in the reduction of molecular oxygen to two molecules of water,oxidation-reduction process
LOC5570947	244.51	2.16977	0.19584	11.0793	1.58163e-28	4.44655e-27	AAEL008679	Alpha-tubulin N-acetyltransferase [Source:UniProtKB/TrEMBL;Acc:A0A2K7P6B5]			GO:0005874,GO:0016740,GO:0016746,GO:0019799,GO:0048666,GO:0070507,GO:0071929	microtubule,transferase activity,transferase activity, transferring acyl groups,tubulin N-acetyltransferase activity,neuron development,regulation of microtubule cytoskeleton organization,alpha-tubulin acetylation
LOC5578704	1064	2.37796	0.214662	11.0777	1.60908e-28	4.51501e-27	AAEL013813				GO:0004483,GO:0006370,GO:0008168,GO:0032259,GO:0080009	mRNA (nucleoside-2'-O-)-methyltransferase activity,7-methylguanosine mRNA capping,methyltransferase activity,methylation,mRNA methylation
LOC110679302	1438.29	-3.21285	0.290255	-11.0691	1.772e-28	4.96263e-27	AAEL027514				GO:0008083	growth factor activity
LOC5578162	538.342	2.61515	0.236293	11.0674	1.80511e-28	5.04567e-27	AAEL013544	snail protein, putative [Source:VB Community Annotation]			GO:0003676	nucleic acid binding
LOC5565048	917.426	-2.39305	0.21625	-11.0661	1.83151e-28	5.10967e-27	AAEL004567	fermitin, putative [Source:VB Community Annotation]			GO:0007155,GO:0007229	cell adhesion,integrin-mediated signaling pathway
LOC5576479	504.74	1.35081	0.122086	11.0644	1.86727e-28	5.19949e-27	AAEL002905				GO:0016020,GO:0016021	membrane,integral component of membrane
LOC5570029	994.773	-1.67838	0.151761	-11.0593	1.97547e-28	5.49029e-27	AAEL000194	phosphatidylinositol 4-kinase [Source:VB Community Annotation]			GO:0016301,GO:0016310,GO:0016740,GO:0046854,GO:0048015	kinase activity,phosphorylation,transferase activity,phosphatidylinositol phosphorylation,phosphatidylinositol-mediated signaling
LOC110674025	664.582	-2.93379	0.265299	-11.0584	1.99585e-28	5.53639e-27	AAEL021538
LOC5576161	1094.63	-1.10133	0.0996567	-11.0513	2.16156e-28	5.98469e-27	AAEL007259				GO:0016020,GO:0016021	membrane,integral component of membrane
LOC5563971	138.572	-2.86267	0.259055	-11.0504	2.18243e-28	6.03104e-27	AAEL004023	juvenile hormone-inducible protein, putative [Source:VB Community Annotation]
LOC110675577	119.054	2.73876	0.247938	11.0461	2.28822e-28	6.31143e-27	AAEL019884
LOC5569192	982.273	-2.41522	0.21875	-11.041	2.42297e-28	6.67048e-27	AAEL007450	Odd skipped, putative [Source:UniProtKB/TrEMBL;Acc:A0A1S4FGI2]			GO:0003676	nucleic acid binding
LOC5567053	1815.8	4.04633	0.366516	11.04	2.4512e-28	6.73549e-27	AAEL005772	odorant binding protein OBP22 [Source:VB Community Annotation]	OBP22		GO:0005549	odorant binding
LOC5568761	1678.59	-1.2245	0.111003	-11.0312	2.70102e-28	7.40801e-27	AAEL007114
LOC5567653	187.712	2.99664	0.271761	11.0268	2.83929e-28	7.77263e-27	AAEL006241	sugar transporter [Source:VB Community Annotation]			GO:0016020,GO:0016021,GO:0022857,GO:0055085	membrane,integral component of membrane,transmembrane transporter activity,transmembrane transport
LOC5572468	138.22	2.823	0.256043	11.0255	2.87954e-28	7.86805e-27	AAEL001833	juvenile hormone-inducible protein, putative [Source:VB Community Annotation]
LOC5574939	2020.25	1.82029	0.165202	11.0186	3.10998e-28	8.48182e-27	AAEL011532
LOC5576072	277.555	-3.58253	0.325325	-11.0121	3.33956e-28	9.09095e-27	AAEL025503				GO:0005886,GO:0016020,GO:0016021,GO:0046983	plasma membrane,membrane,integral component of membrane,protein dimerization activity
LOC110676984	162.044	-3.00152	0.272785	-11.0032	3.68715e-28	1.00185e-26	AAEL010348	sugar transporter [Source:VB Community Annotation]			GO:0016020,GO:0016021,GO:0022857,GO:0055085	membrane,integral component of membrane,transmembrane transporter activity,transmembrane transport
LOC5576709	267.242	-2.06097	0.187372	-10.9993	3.84914e-28	1.04392e-26	AAEL002974				GO:0005576,GO:0007165,GO:0008083	extracellular region,signal transduction,growth factor activity
LOC5567483	2836.64	-2.44261	0.222181	-10.9938	4.09403e-28	1.10827e-26	AAEL000973				GO:0005179,GO:0005576,GO:0007165	hormone activity,extracellular region,signal transduction
LOC5572224	1783.89	2.24512	0.204285	10.9901	4.26353e-28	1.15202e-26	AAEL009658	alpha,alpha-trehalase [Source:VB Community Annotation]			GO:0003824,GO:0004555,GO:0005975,GO:0005991,GO:0008152,GO:0016787,GO:0016798	catalytic activity,alpha,alpha-trehalase activity,carbohydrate metabolic process,trehalose metabolic process,metabolic process,hydrolase activity,hydrolase activity, acting on glycosyl bonds
LOC5574509	541.944	1.62712	0.148081	10.9881	4.36164e-28	1.17635e-26	AAEL015107				GO:0005789,GO:0006506,GO:0016020,GO:0016021	endoplasmic reticulum membrane,GPI anchor biosynthetic process,membrane,integral component of membrane
LOC5567861	645.303	1.70428	0.15515	10.9848	4.52489e-28	1.21813e-26	AAEL006317	short-chain dehydrogenase [Source:VB Community Annotation]			GO:0004454,GO:0006000,GO:0016020,GO:0016021,GO:0046835,GO:0055114	ketohexokinase activity,fructose metabolic process,membrane,integral component of membrane,carbohydrate phosphorylation,oxidation-reduction process
LOC5572914	110.235	-4.03514	0.367499	-10.98	4.76909e-28	1.28151e-26	AAEL014773
LOC5564392	2480.87	1.91402	0.174367	10.977	4.93211e-28	1.32288e-26	AAEL004234				GO:0005783,GO:0005789,GO:0016020,GO:0016021,GO:0043231,GO:0046872,GO:0051537	endoplasmic reticulum,endoplasmic reticulum membrane,membrane,integral component of membrane,intracellular membrane-bounded organelle,metal ion binding,2 iron, 2 sulfur cluster binding
LOC5570792	6842.75	-1.37887	0.125623	-10.9763	4.96941e-28	1.33043e-26	AAEL008562				GO:0003676,GO:0005634,GO:0008270,GO:0046872	nucleic acid binding,nucleus,zinc ion binding,metal ion binding
LOC5565057	266.547	-3.60336	0.328787	-10.9596	5.97929e-28	1.59787e-26	AAEL027515
LOC5576370	2863.7	-1.51611	0.138378	-10.9563	6.19615e-28	1.6528e-26	AAEL012466	integrin beta subunit [Source:VB Community Annotation]			GO:0003676,GO:0005634,GO:0007155,GO:0007229,GO:0008270,GO:0016020,GO:0016021,GO:0046872	nucleic acid binding,nucleus,cell adhesion,integrin-mediated signaling pathway,zinc ion binding,membrane,integral component of membrane,metal ion binding
LOC5573842	830.44	1.93218	0.176378	10.9548	6.30458e-28	1.67865e-26	AAEL021227				GO:0003779,GO:0005856,GO:0017124,GO:0042995	actin binding,cytoskeleton,SH3 domain binding,cell projection
LOC5569442	698.392	2.58151	0.235734	10.9509	6.57777e-28	1.7482e-26	AAEL022844				GO:0006812,GO:0006829,GO:0008324,GO:0016020,GO:0016021,GO:0055085,GO:0098655	cation transport,zinc ion transport,cation transmembrane transporter activity,membrane,integral component of membrane,transmembrane transport,cation transmembrane transport
LOC5579360	228.618	-2.36368	0.216025	-10.9417	7.28224e-28	1.93191e-26	AAEL015533				GO:0004252,GO:0006508	serine-type endopeptidase activity,proteolysis
LOC5566250	1104.91	-2.79291	0.255263	-10.9413	7.31211e-28	1.93632e-26	AAEL015109	Clip-Domain Serine Protease family D. [Source:VB Community Annotation]	CLIPD10		GO:0004252,GO:0006508	serine-type endopeptidase activity,proteolysis
LOC5573562	772.64	2.49012	0.227698	10.9361	7.74704e-28	2.04777e-26	AAEL002103	histone H1, putative [Source:VB Community Annotation]			GO:0000786,GO:0003677,GO:0005634,GO:0006334,GO:0042025	nucleosome,DNA binding,nucleus,nucleosome assembly,host cell nucleus
LOC5573849	3359.55	2.41579	0.220963	10.933	8.01605e-28	2.11505e-26	AAEL010766	inositol triphosphate 3-kinase c [Source:VB Community Annotation]			GO:0016301,GO:0016310,GO:0016740,GO:0032958	kinase activity,phosphorylation,transferase activity,inositol phosphate biosynthetic process
LOC110680464	355.033	2.90628	0.265909	10.9296	8.32312e-28	2.19211e-26	AAEL022585
LOC5573469	407.492	-4.06528	0.372076	-10.9259	8.6646e-28	2.27793e-26	AAEL010513	class b basic helix-loop-helix protein (bhlhb) (differentially expressed in chondrocytes) (mdec) (sharp) [Source:VB Community Annotation]			GO:0003677,GO:0006355,GO:0046983	DNA binding,regulation of transcription, DNA-templated,protein dimerization activity
LOC5570021	411.96	-1.79763	0.164533	-10.9256	8.6938e-28	2.2815e-26	AAEL000215	ribonuclease P, 29kD-subunit, putative [Source:VB Community Annotation]			GO:0001682,GO:0003723,GO:0004518,GO:0004519,GO:0004526,GO:0004540,GO:0005730,GO:0005737,GO:0006396,GO:0008033,GO:0016787,GO:0030677,GO:0090305,GO:0090501,GO:0090502	tRNA 5'-leader removal,RNA binding,nuclease activity,endonuclease activity,ribonuclease P activity,ribonuclease activity,nucleolus,cytoplasm,RNA processing,tRNA processing,hydrolase activity,ribonuclease P complex,nucleic acid phosphodiester bond hydrolysis,RNA phosphodiester bond hydrolysis,RNA phosphodiester bond hydrolysis, endonucleolytic
LOC5566542	629.959	1.97909	0.181196	10.9224	9.00932e-28	2.36005e-26	AAEL005477	amidase [Source:VB Community Annotation]			GO:0005739	mitochondrion
LOC5567644	605.946	1.91539	0.175371	10.922	9.05306e-28	2.36726e-26	AAEL006236	dtdp-glucose 4-6-dehydratase [Source:VB Community Annotation]
LOC5576486	2531.03	-1.77647	0.162836	-10.9095	1.03792e-27	2.70918e-26	AAEL002913	peroxisomal membrane protein 70 abcd3 [Source:VB Community Annotation]			GO:0000166,GO:0005524,GO:0005777,GO:0015910,GO:0016020,GO:0016021,GO:0016887,GO:0042626,GO:0042803,GO:0055085	nucleotide binding,ATP binding,peroxisome,long-chain fatty acid import into peroxisome,membrane,integral component of membrane,ATPase activity,ATPase-coupled transmembrane transporter activity,protein homodimerization activity,transmembrane transport
LOC5567705	2178.13	1.79346	0.164522	10.9011	1.13933e-27	2.96857e-26	AAEL006279				GO:0016020,GO:0016021	membrane,integral component of membrane
LOC5578144	910.433	1.54516	0.141809	10.8961	1.20366e-27	3.1306e-26	AAEL013521	tryptophanyl-tRNA synthetase [Source:VB Community Annotation]			GO:0000166,GO:0004812,GO:0004830,GO:0005524,GO:0006412,GO:0006418,GO:0006436,GO:0016874	nucleotide binding,aminoacyl-tRNA ligase activity,tryptophan-tRNA ligase activity,ATP binding,translation,tRNA aminoacylation for protein translation,tryptophanyl-tRNA aminoacylation,ligase activity
LOC5579269	673.514	1.56986	0.144081	10.8957	1.20791e-27	3.13606e-26	AAEL015640	transcription factor IIIA, putative [Source:VB Community Annotation]			GO:0003676	nucleic acid binding
LOC5571961	756.897	1.95335	0.179281	10.8954	1.21208e-27	3.14129e-26	AAEL012369
LOC5567259	799.864	2.08496	0.191415	10.8924	1.25331e-27	3.24239e-26	AAEL005931	6-phosphogluconate dehydrogenase [Source:VB Community Annotation]			GO:0004616,GO:0006098,GO:0016491,GO:0019521,GO:0050661,GO:0055114	phosphogluconate dehydrogenase (decarboxylating) activity,pentose-phosphate shunt,oxidoreductase activity,D-gluconate metabolic process,NADP binding,oxidation-reduction process
LOC5579050	1507.65	-1.09587	0.100716	-10.8808	1.42288e-27	3.67455e-26	AAEL013985	DEAD box ATP-dependent RNA helicase [Source:VB Community Annotation]			GO:0000166,GO:0003676,GO:0003724,GO:0004386,GO:0005524,GO:0016787	nucleotide binding,nucleic acid binding,RNA helicase activity,helicase activity,ATP binding,hydrolase activity
LOC5577142	156.032	-3.15977	0.29043	-10.8796	1.44154e-27	3.71617e-26	AAEL003112				GO:0042302	structural constituent of cuticle
LOC5567927	855.688	3.05072	0.280449	10.878	1.46777e-27	3.77711e-26	AAEL006372	sulphate transporter [Source:VB Community Annotation]			GO:0008271,GO:0008272,GO:0015116,GO:0016020,GO:0016021,GO:0055085,GO:1902358	secondary active sulfate transmembrane transporter activity,sulfate transport,sulfate transmembrane transporter activity,membrane,integral component of membrane,transmembrane transport,sulfate transmembrane transport
LOC5564560	260.42	3.22837	0.296907	10.8734	1.54418e-27	3.96676e-26	AAEL004318
LOC5567541	614.507	1.45232	0.133579	10.8724	1.56069e-27	4.00211e-26	AAEL006121	trypsin, putative [Source:VB Community Annotation]			GO:0004252,GO:0006508	serine-type endopeptidase activity,proteolysis
LOC5564282	1210.2	-2.47409	0.227596	-10.8706	1.59203e-27	4.07531e-26	AAEL014378				GO:0016020,GO:0016021	membrane,integral component of membrane
LOC110681173	237.476	-2.14681	0.197606	-10.8641	1.70911e-27	4.36736e-26	AAEL024239				GO:0006486,GO:0016020	protein glycosylation,membrane
LOC110676083	195.802	2.61223	0.240628	10.8559	1.86992e-27	4.76993e-26	AAEL020680
LOC5571223	213.537	2.74519	0.252919	10.854	1.90827e-27	4.85927e-26	AAEL008916				GO:0005267,GO:0006811,GO:0006813,GO:0016020,GO:0016021,GO:0071805	potassium channel activity,ion transport,potassium ion transport,membrane,integral component of membrane,potassium ion transmembrane transport
LOC5575680	397.036	1.98193	0.182742	10.8455	2.09418e-27	5.32336e-26	AAEL018230				GO:0008146,GO:0016020,GO:0016021	sulfotransferase activity,membrane,integral component of membrane
LOC5574307	378.027	2.35147	0.216835	10.8445	2.11758e-27	5.3735e-26	AAEL024640
LOC5577310	515.122	2.55161	0.235327	10.8428	2.15736e-27	5.46495e-26	AAEL019790				GO:0004888,GO:0004930,GO:0005515,GO:0005886,GO:0007165,GO:0007166,GO:0007186,GO:0016020,GO:0016021,GO:0016055,GO:0042813	transmembrane signaling receptor activity,G protein-coupled receptor activity,protein binding,plasma membrane,signal transduction,cell surface receptor signaling pathway,G protein-coupled receptor signaling pathway,membrane,integral component of membrane,Wnt signaling pathway,Wnt-activated receptor activity
LOC5567329	5938.65	1.46293	0.134932	10.8419	2.17811e-27	5.50794e-26	AAEL005997	allergen, putative [Source:VB Community Annotation]			GO:0008289	lipid binding
LOC5566126	473.319	-2.0124	0.18579	-10.8316	2.43928e-27	6.1577e-26	AAEL005201	hydroxymethylglutaryl-coa synthase [Source:VB Community Annotation]			GO:0003824,GO:0004421,GO:0006629,GO:0006694,GO:0008202,GO:0008299,GO:0016126,GO:0016740,GO:0016746	catalytic activity,hydroxymethylglutaryl-CoA synthase activity,lipid metabolic process,steroid biosynthetic process,steroid metabolic process,isoprenoid biosynthetic process,sterol biosynthetic process,transferase activity,transferase activity, transferring acyl groups
LOC5568275	245.57	2.58663	0.238819	10.831	2.45577e-27	6.18863e-26	AAEL026387				GO:0016747	transferase activity, transferring acyl groups other than amino-acyl groups
LOC5572685	2505.91	2.26945	0.209546	10.8303	2.47376e-27	6.22321e-26	AAEL021169
LOC110681148	204.988	-2.12148	0.195931	-10.8277	2.54599e-27	6.39389e-26	AAEL023503				GO:0003677,GO:0006355,GO:0043565	DNA binding,regulation of transcription, DNA-templated,sequence-specific DNA binding
LOC5570607	410.049	-2.15696	0.19936	-10.8194	2.78622e-27	6.98517e-26	AAEL008421	cadherin [Source:VB Community Annotation]			GO:0005509,GO:0005886,GO:0007155,GO:0007156,GO:0016020	calcium ion binding,plasma membrane,cell adhesion,homophilic cell adhesion via plasma membrane adhesion molecules,membrane
LOC110680292	242.654	-2.12366	0.196294	-10.8188	2.80448e-27	7.0189e-26	AAEL025781
LOC5572858	90.0697	-4.728	0.437056	-10.8178	2.83426e-27	7.08129e-26	AAEL010067				GO:0005154,GO:0007173,GO:0016020,GO:0016021,GO:0048018	epidermal growth factor receptor binding,epidermal growth factor receptor signaling pathway,membrane,integral component of membrane,receptor ligand activity
LOC5565900	483.972	1.89729	0.175414	10.8161	2.88922e-27	7.20625e-26	AAEL000716	chondroitin 4-sulfotransferase [Source:VB Community Annotation]			GO:0000139,GO:0005794,GO:0005975,GO:0008146,GO:0016020,GO:0016021,GO:0016051,GO:0016740	Golgi membrane,Golgi apparatus,carbohydrate metabolic process,sulfotransferase activity,membrane,integral component of membrane,carbohydrate biosynthetic process,transferase activity
LOC110677125	242.227	-2.12053	0.196348	-10.7999	3.44714e-27	8.58314e-26	AAEL021286
LOC5577468	543.605	1.73234	0.160458	10.7962	3.58866e-27	8.9203e-26	AAEL013204				GO:0005515,GO:0008270,GO:0046872	protein binding,zinc ion binding,metal ion binding
LOC5574619	298.98	2.39554	0.222112	10.7853	4.03985e-27	1.00247e-25	AAEL008693	Cation efflux protein/ zinc transporter [Source:UniProtKB/TrEMBL;Acc:A0A1S4FKH5]			GO:0006812,GO:0006829,GO:0008324,GO:0016020,GO:0016021,GO:0055085,GO:0098655	cation transport,zinc ion transport,cation transmembrane transporter activity,membrane,integral component of membrane,transmembrane transport,cation transmembrane transport
LOC5577566	18021.5	1.08195	0.10034	10.7828	4.14891e-27	1.02779e-25	AAEL013272	60S ribosomal protein L37a [Source:VB Community Annotation]	RpL27a		GO:0003735,GO:0005840,GO:0006412	structural constituent of ribosome,ribosome,translation
LOC5570905	275.384	2.14506	0.199226	10.7669	4.93085e-27	1.21942e-25	AAEL001492	cgmp-dependent 3,5-cyclic phosphodiesterase [Source:VB Community Annotation]			GO:0004114,GO:0005515,GO:0007165,GO:0008081,GO:0016787,GO:0046872,GO:0047555	3',5'-cyclic-nucleotide phosphodiesterase activity,protein binding,signal transduction,phosphoric diester hydrolase activity,hydrolase activity,metal ion binding,3',5'-cyclic-GMP phosphodiesterase activity
LOC5576319	1502.45	-2.35873	0.219111	-10.765	5.03574e-27	1.24326e-25	AAEL000405	odd Oz protein [Source:VB Community Annotation]			GO:0005886,GO:0016020	plasma membrane,membrane
LOC5565550	809.158	2.04209	0.189731	10.7631	5.14259e-27	1.26749e-25	AAEL004854				GO:0005634,GO:0005737	nucleus,cytoplasm
LOC5575051	2058.37	-1.17292	0.109016	-10.7592	5.36342e-27	1.31969e-25	AAEL025664				GO:0004672,GO:0005524,GO:0006468,GO:0007094	protein kinase activity,ATP binding,protein phosphorylation,mitotic spindle assembly checkpoint
LOC5576653	28705.7	1.074	0.0998616	10.7549	5.61942e-27	1.38035e-25	AAEL012686	40S ribosomal protein S23 [Source:UniProtKB/TrEMBL;Acc:Q1HRM5]	RpS23		GO:0003735,GO:0005840,GO:0006412,GO:0015935	structural constituent of ribosome,ribosome,translation,small ribosomal subunit
LOC5576238	578.474	1.24411	0.115724	10.7507	5.88429e-27	1.44299e-25	AAEL002840				GO:0005515	protein binding
LOC5575138	569.25	2.58	0.240073	10.7468	6.13774e-27	1.50261e-25	AAEL000327	Ecdysone-induced protein 78C Nuclear receptor [Source:VB Community Annotation]	E78		GO:0003677,GO:0003700,GO:0003707,GO:0004879,GO:0005634,GO:0006355,GO:0008270,GO:0030522,GO:0042025,GO:0043565,GO:0046872	DNA binding,DNA-binding transcription factor activity,steroid hormone receptor activity,nuclear receptor activity,nucleus,regulation of transcription, DNA-templated,zinc ion binding,intracellular receptor signaling pathway,host cell nucleus,sequence-specific DNA binding,metal ion binding
LOC110678839	808.154	-1.57452	0.146737	-10.7302	7.34102e-27	1.79418e-25	AAEL020455
LOC5572377	633.46	2.03736	0.189958	10.7253	7.74259e-27	1.88917e-25	AAEL009765	choline/ethanolamine kinase [Source:VB Community Annotation]
LOC5572598	300.452	-1.97148	0.183843	-10.7237	7.87612e-27	1.91854e-25	AAEL024775				GO:0003743,GO:0005737,GO:0005852	translation initiation factor activity,cytoplasm,eukaryotic translation initiation factor 3 complex
LOC5575285	476.858	-2.05816	0.191984	-10.7204	8.16071e-27	1.98455e-25	AAEL011756	aldehyde dehydrogenase [Source:VB Community Annotation]			GO:0016491,GO:0016620,GO:0055114	oxidoreductase activity,oxidoreductase activity, acting on the aldehyde or oxo group of donors, NAD or NADP as acceptor,oxidation-reduction process
LOC110675989	735.299	1.43295	0.133676	10.7196	8.23952e-27	2.00038e-25	AAEL025110
LOC5574176	807.396	-1.57474	0.147002	-10.7124	8.90357e-27	2.15801e-25	AAEL020455
LOC5570456	2505.28	-1.37833	0.128674	-10.7118	8.96064e-27	2.16824e-25	AAEL019549				GO:0005515,GO:0016020,GO:0016021	protein binding,membrane,integral component of membrane
LOC5563945	600.898	1.76903	0.165156	10.7112	9.0148e-27	2.17773e-25	AAEL014248				GO:0005886,GO:0005887,GO:0016020,GO:0016021,GO:0032217,GO:0032218	plasma membrane,integral component of plasma membrane,membrane,integral component of membrane,riboflavin transmembrane transporter activity,riboflavin transport
LOC5564353	1699.6	1.59336	0.148818	10.7068	9.45707e-27	2.2808e-25	AAEL004221	glycogen synthase [Source:VB Community Annotation]			GO:0004373,GO:0005978,GO:0016740,GO:0016757	glycogen (starch) synthase activity,glycogen biosynthetic process,transferase activity,transferase activity, transferring glycosyl groups
LOC5564280	251.758	2.67515	0.249935	10.7034	9.81455e-27	2.3631e-25	AAEL014380				GO:0008270	zinc ion binding
LOC5573045	205.317	-3.01151	0.281365	-10.7032	9.83159e-27	2.36331e-25	AAEL010221	GATA transcription factor (GATAd) [Source:VB Community Annotation]			GO:0003700,GO:0005634,GO:0006355,GO:0006357,GO:0008270,GO:0043565,GO:0046872	DNA-binding transcription factor activity,nucleus,regulation of transcription, DNA-templated,regulation of transcription by RNA polymerase II,zinc ion binding,sequence-specific DNA binding,metal ion binding
LOC5571874	1052.08	1.81123	0.169246	10.7017	9.98839e-27	2.39705e-25	AAEL024528				GO:0000166,GO:0003774,GO:0003779,GO:0005515,GO:0005524,GO:0016459,GO:0051015	nucleotide binding,motor activity,actin binding,protein binding,ATP binding,myosin complex,actin filament binding
LOC5578717	1048.41	2.24009	0.209394	10.698	1.0401e-26	2.49198e-25	AAEL003861	bmp-induced factor [Source:VB Community Annotation]			GO:0003676,GO:0005515	nucleic acid binding,protein binding
LOC5567310	307.526	3.00435	0.280999	10.6916	1.11372e-26	2.66398e-25	AAEL005961	actin [Source:VB Community Annotation]			GO:0005524,GO:0005737,GO:0005856	ATP binding,cytoplasm,cytoskeleton
LOC5568483	2127.99	-1.22042	0.114153	-10.6911	1.1204e-26	2.67558e-25	AAEL006884				GO:0003677	DNA binding
LOC5573132	9478.05	-1.62941	0.152498	-10.6849	1.1984e-26	2.85717e-25	AAEL002023	imaginal disc growth factor [Source:VB Community Annotation]			GO:0005576,GO:0005975,GO:0008061	extracellular region,carbohydrate metabolic process,chitin binding
LOC5577490	6040.31	-3.00192	0.281045	-10.6813	1.2454e-26	2.96438e-25	AAEL013233	PIWI [Source:VB Community Annotation]	PIWI5		GO:0003676,GO:0005515,GO:0031047	nucleic acid binding,protein binding,gene silencing by RNA
LOC5563721	1012.06	-1.59149	0.149098	-10.6741	1.34543e-26	3.19725e-25	AAEL003919	cationic amino acid transporter [Source:VB Community Annotation]			GO:0016020,GO:0016021,GO:0022857,GO:0055085	membrane,integral component of membrane,transmembrane transporter activity,transmembrane transport
LOC5567290	14097.3	-1.12548	0.105447	-10.6734	1.35565e-26	3.21632e-25	AAEL005947	G-rich sequence factor-1, putative [Source:VB Community Annotation]			GO:0003676,GO:0003723	nucleic acid binding,RNA binding
LOC110681170	171.57	-2.67969	0.251077	-10.6728	1.3651e-26	3.23346e-25	AAEL021655
LOC5574270	426.97	-1.79179	0.167916	-10.6707	1.39504e-26	3.29902e-25	AAEL011038	integrin alpha-ps [Source:VB Community Annotation]			GO:0007155,GO:0007229,GO:0008305,GO:0016020,GO:0016021	cell adhesion,integrin-mediated signaling pathway,integrin complex,membrane,integral component of membrane
LOC5572405	182.198	2.67525	0.250904	10.6624	1.5255e-26	3.6017e-25	AAEL009787
LOC110674159	179.099	2.10224	0.197439	10.6476	1.79008e-26	4.21955e-25	AAEL023718				GO:0005515	protein binding
LOC5578459	5599.68	-0.892565	0.0838685	-10.6424	1.89116e-26	4.45063e-25	AAEL000486	chaperonin [Source:VB Community Annotation]			GO:0000166,GO:0005524,GO:0005737,GO:0006457,GO:0051082	nucleotide binding,ATP binding,cytoplasm,protein folding,unfolded protein binding
LOC110680553	1024.62	-1.72099	0.161743	-10.6403	1.93554e-26	4.54773e-25	AAEL022056				GO:0005524,GO:0033180,GO:0046034,GO:1902600	ATP binding,proton-transporting V-type ATPase, V1 domain,ATP metabolic process,proton transmembrane transport
LOC5571484	10548.5	-0.862772	0.081115	-10.6364	2.01767e-26	4.73309e-25	AAEL001605	microtubule binding protein, putative [Source:VB Community Annotation]			GO:0005515	protein binding
LOC5577590	375.042	2.9135	0.273953	10.6351	2.04701e-26	4.7942e-25	AAEL013288				GO:0005768,GO:0005770,GO:0016020,GO:0016021	endosome,late endosome,membrane,integral component of membrane
LOC5569243	1092.1	-2.78969	0.262325	-10.6345	2.05995e-26	4.81679e-25	AAEL007505	iroquois-class homeodomain protein irx [Source:VB Community Annotation]			GO:0000981,GO:0003677,GO:0005634,GO:0006355,GO:0006357,GO:0043565	DNA-binding transcription factor activity, RNA polymerase II-specific,DNA binding,nucleus,regulation of transcription, DNA-templated,regulation of transcription by RNA polymerase II,sequence-specific DNA binding
LOC5569566	5053.49	1.18609	0.111602	10.6278	2.21213e-26	5.16436e-25	AAEL007752	cytochrome c oxidase, subunit VIIA, putative [Source:VB Community Annotation]			GO:0004129,GO:0005739,GO:0005746,GO:0009055,GO:0016020,GO:0016021,GO:0022900,GO:1902600	cytochrome-c oxidase activity,mitochondrion,mitochondrial respirasome,electron transfer activity,membrane,integral component of membrane,electron transport chain,proton transmembrane transport
LOC110678629	154.894	-3.76154	0.354308	-10.6166	2.49502e-26	5.81547e-25	AAEL028247
LOC5569230	481.279	1.40812	0.132707	10.6108	2.65475e-26	6.1779e-25	AAEL007480	Glutamate-cysteine ligase, regulatory-subunit, putative [Source:UniProtKB/TrEMBL;Acc:A0A1S4FGN5]			GO:0005515,GO:0016020,GO:0016021,GO:0016874	protein binding,membrane,integral component of membrane,ligase activity
LOC5574747	17040.9	-1.0974	0.103444	-10.6086	2.71781e-26	6.31458e-25	AAEL019990				GO:0003677,GO:0005634,GO:0005694	DNA binding,nucleus,chromosome
LOC5570694	338.811	2.0303	0.191516	10.6012	2.94193e-26	6.82443e-25	AAEL008497				GO:0016020,GO:0016021	membrane,integral component of membrane
LOC5567106	3877.22	-2.63341	0.248484	-10.5979	3.04741e-26	7.0579e-25	AAEL005829				GO:0003713,GO:0005634,GO:1903508	transcription coactivator activity,nucleus,positive regulation of nucleic acid-templated transcription
LOC5568579	304.438	2.54649	0.240371	10.594	3.17689e-26	7.34613e-25	AAEL001151	n-acetylgalactosaminyltransferase [Source:VB Community Annotation]			GO:0000139,GO:0005794,GO:0006486,GO:0016020,GO:0016021,GO:0016740,GO:0016757,GO:0030246	Golgi membrane,Golgi apparatus,protein glycosylation,membrane,integral component of membrane,transferase activity,transferase activity, transferring glycosyl groups,carbohydrate binding
LOC5566195	326.204	-2.87929	0.27224	-10.5763	3.83871e-26	8.86244e-25	AAEL005242				GO:0005634,GO:0005737	nucleus,cytoplasm
LOC5564327	1247.01	2.25518	0.213238	10.5759	3.85568e-26	8.88756e-25	AAEL000584	sex-determining region y protein, sry [Source:VB Community Annotation]			GO:0003677,GO:0005634,GO:0006355	DNA binding,nucleus,regulation of transcription, DNA-templated
LOC5574653	925.558	2.15546	0.203864	10.573	3.9739e-26	9.14562e-25	AAEL011287	ubiquitin specific protease [Source:VB Community Annotation]			GO:0004843,GO:0006508,GO:0006511,GO:0008233,GO:0016579,GO:0036459	thiol-dependent ubiquitin-specific protease activity,proteolysis,ubiquitin-dependent protein catabolic process,peptidase activity,protein deubiquitination,thiol-dependent ubiquitinyl hydrolase activity
LOC5578080	564.228	2.15455	0.203848	10.5694	4.13118e-26	9.49262e-25	AAEL003435
LOC5570552	1372.15	2.01627	0.190923	10.5607	4.53355e-26	1.04008e-24	AAEL008370	Class B Scavenger Receptor (CD36 domain). [Source:VB Community Annotation]	SCRB17		GO:0005886,GO:0016020,GO:0016021	plasma membrane,membrane,integral component of membrane
LOC5569929	367.487	2.14348	0.203044	10.5567	4.72881e-26	1.08317e-24	AAEL008029	Ras-related protein, putative [Source:UniProtKB/TrEMBL;Acc:A0A1S4FIJ0]			GO:0003924,GO:0005525,GO:0016020,GO:0016021	GTPase activity,GTP binding,membrane,integral component of membrane
LOC5566832	552.987	2.35605	0.223212	10.5552	4.80542e-26	1.09899e-24	AAEL005665	Serine Protease Inhibitor (serpin) likely cleavage at T/I. [Source:VB Community Annotation]	SRPN3		GO:0004867,GO:0005615,GO:0010466,GO:0010951,GO:0030414	serine-type endopeptidase inhibitor activity,extracellular space,negative regulation of peptidase activity,negative regulation of endopeptidase activity,peptidase inhibitor activity
LOC5566052	230.472	1.81157	0.171648	10.554	4.86852e-26	1.11146e-24	AAEL005142	platelet endothelial tetraspan antigen 3 (cd151 antigen) [Source:VB Community Annotation]			GO:0016020,GO:0016021	membrane,integral component of membrane
LOC5566495	371.432	-1.87902	0.178041	-10.5539	4.87514e-26	1.11146e-24	AAEL005429	2-oxoglutarate dehydrogenase [Source:VB Community Annotation]			GO:0004591,GO:0006099,GO:0016491,GO:0016624,GO:0030976,GO:0055114	oxoglutarate dehydrogenase (succinyl-transferring) activity,tricarboxylic acid cycle,oxidoreductase activity,oxidoreductase activity, acting on the aldehyde or oxo group of donors, disulfide as acceptor,thiamine pyrophosphate binding,oxidation-reduction process
LOC5575396	431.057	-3.18867	0.30222	-10.5508	5.03564e-26	1.14626e-24	AAEL011801
LOC5570793	1158.98	1.262	0.119688	10.544	5.41288e-26	1.23021e-24	AAEL008564	Protein cueball Precursor [Source:VB Community Annotation]			GO:0003674,GO:0005575,GO:0005886,GO:0007283,GO:0008080,GO:0016020,GO:0016021,GO:0030154,GO:0048477	molecular_function,cellular_component,plasma membrane,spermatogenesis,N-acetyltransferase activity,membrane,integral component of membrane,cell differentiation,oogenesis
LOC5576990	968.867	-2.86597	0.272064	-10.5342	6.01189e-26	1.36422e-24	AAEL003051				GO:0005634,GO:0042025,GO:0043565	nucleus,host cell nucleus,sequence-specific DNA binding
LOC5567237	1480.81	-2.31208	0.219496	-10.5336	6.04592e-26	1.36981e-24	AAEL000874	Apaf-1 Related Killer [Source:VB Community Annotation]	ARK		GO:0005515,GO:0043531	protein binding,ADP binding
LOC5575800	368.699	2.36937	0.225092	10.5262	6.54012e-26	1.47949e-24	AAEL012078	Gamma-glutamylcyclotransferase [Source:UniProtKB/TrEMBL;Acc:Q16N66]			GO:0003839,GO:0006751,GO:0016829,GO:0061928	gamma-glutamylcyclotransferase activity,glutathione catabolic process,lyase activity,glutathione specific gamma-glutamylcyclotransferase activity
LOC5570317	4129.68	-1.46057	0.138811	-10.522	6.83954e-26	1.54482e-24	AAEL008247	DNA polymerase alpha catalytic subunit [Source:VB Community Annotation]			GO:0000166,GO:0001882,GO:0003676,GO:0003677,GO:0003887,GO:0005634,GO:0006260,GO:0016740,GO:0016779,GO:0046872,GO:0051536,GO:0051539,GO:0071897	nucleotide binding,nucleoside binding,nucleic acid binding,DNA binding,DNA-directed DNA polymerase activity,nucleus,DNA replication,transferase activity,nucleotidyltransferase activity,metal ion binding,iron-sulfur cluster binding,4 iron, 4 sulfur cluster binding,DNA biosynthetic process
LOC5575839	329.095	-2.51168	0.238742	-10.5205	6.95067e-26	1.5675e-24	AAEL012102
LOC5574050	4805.79	-2.43273	0.231351	-10.5154	7.34066e-26	1.65289e-24	AAEL010898				GO:0016020,GO:0016021	membrane,integral component of membrane
LOC5574200	472.725	2.30008	0.218814	10.5116	7.63848e-26	1.7173e-24	AAEL002320				GO:0005634,GO:0008270,GO:0046872	nucleus,zinc ion binding,metal ion binding
LOC5564875	1422.91	1.73797	0.165357	10.5104	7.73622e-26	1.7366e-24	AAEL004462
LOC5563981	124.357	-3.11817	0.296915	-10.5019	8.46504e-26	1.89729e-24	AAEL004003	glucose dehydrogenase [Source:VB Community Annotation]			GO:0016020,GO:0016021,GO:0016614,GO:0050660,GO:0055114	membrane,integral component of membrane,oxidoreductase activity, acting on CH-OH group of donors,flavin adenine dinucleotide binding,oxidation-reduction process
LOC5577984	6557.36	1.563	0.148881	10.4983	8.79175e-26	1.96749e-24	AAEL013458	glutamine synthetase 1, 2 (glutamate-amonia ligase) (gs) [Source:VB Community Annotation]			GO:0000166,GO:0003824,GO:0004356,GO:0005524,GO:0006542,GO:0006807,GO:0016874	nucleotide binding,catalytic activity,glutamate-ammonia ligase activity,ATP binding,glutamine biosynthetic process,nitrogen compound metabolic process,ligase activity
LOC5572676	1036.52	-2.42163	0.230699	-10.4969	8.92271e-26	1.99356e-24	AAEL022179				GO:0000981,GO:0003677,GO:0003700,GO:0005634,GO:0006355,GO:0006357,GO:0007275,GO:0043565	DNA-binding transcription factor activity, RNA polymerase II-specific,DNA binding,DNA-binding transcription factor activity,nucleus,regulation of transcription, DNA-templated,regulation of transcription by RNA polymerase II,multicellular organism development,sequence-specific DNA binding
LOC5568245	418.982	2.65617	0.253046	10.4968	8.93555e-26	1.99356e-24	AAEL006675	RNA-binding protein, putative [Source:UniProtKB/TrEMBL;Acc:A0A1S4FEF6]			GO:0003676,GO:0003723,GO:1990904	nucleic acid binding,RNA binding,ribonucleoprotein complex
LOC5578710	1300.03	2.76608	0.263587	10.494	9.20376e-26	2.05026e-24	AAEL013823	calcium/calmodulin dependent protein kinase ii [Source:VB Community Annotation]			GO:0000166,GO:0004672,GO:0004674,GO:0004683,GO:0005516,GO:0005524,GO:0006468,GO:0016020,GO:0016021,GO:0016301,GO:0016310	nucleotide binding,protein kinase activity,protein serine/threonine kinase activity,calmodulin-dependent protein kinase activity,calmodulin binding,ATP binding,protein phosphorylation,membrane,integral component of membrane,kinase activity,phosphorylation
LOC5564410	92.1386	-3.52813	0.336348	-10.4895	9.65038e-26	2.14647e-24	AAEL019686
LOC5567245	2682.81	-2.2362	0.213308	-10.4834	1.02947e-25	2.2863e-24	AAEL019654				GO:0005086,GO:0005515,GO:0005737,GO:0032012	ARF guanyl-nucleotide exchange factor activity,protein binding,cytoplasm,regulation of ARF protein signal transduction
LOC110677013	811.806	1.45364	0.138682	10.4818	1.04714e-25	2.322e-24	AAEL026470				GO:0003677,GO:0003697,GO:0003824,GO:0004518,GO:0004519,GO:0004527,GO:0005634,GO:0006281,GO:0006289,GO:0006974,GO:0016787,GO:0016788,GO:0046872,GO:0090305	DNA binding,single-stranded DNA binding,catalytic activity,nuclease activity,endonuclease activity,exonuclease activity,nucleus,DNA repair,nucleotide-excision repair,cellular response to DNA damage stimulus,hydrolase activity,hydrolase activity, acting on ester bonds,metal ion binding,nucleic acid phosphodiester bond hydrolysis
LOC5573827	25753.3	1.21748	0.116203	10.4772	1.09955e-25	2.43453e-24	AAEL010756	40S ribosomal protein S19 [Source:UniProtKB/TrEMBL;Acc:Q1HRR8]	RpS19		GO:0003735,GO:0005840,GO:0006412	structural constituent of ribosome,ribosome,translation
LOC5572287	1153.64	-1.08604	0.103693	-10.4736	1.14224e-25	2.52521e-24	AAEL001752	chloride channel protein 3 [Source:VB Community Annotation]			GO:0005247,GO:0006811,GO:0006821,GO:0016020,GO:0016021,GO:0055085,GO:1902476	voltage-gated chloride channel activity,ion transport,chloride transport,membrane,integral component of membrane,transmembrane transport,chloride transmembrane transport
LOC5576060	2555.46	-1.32677	0.126692	-10.4724	1.15672e-25	2.55337e-24	AAEL025202
LOC5565070	159.283	2.14997	0.205316	10.4715	1.16733e-25	2.57288e-24	AAEL004577	pmp22 peroxisomal membrane protein, putative [Source:VB Community Annotation]			GO:0016020,GO:0016021	membrane,integral component of membrane
LOC5573372	17798.4	-0.992149	0.0947764	-10.4683	1.20783e-25	2.65813e-24	AAEL010467	heterogeneous nuclear ribonucleoprotein [Source:VB Community Annotation]			GO:0003676,GO:0003723,GO:0003729	nucleic acid binding,RNA binding,mRNA binding
LOC5564683	21166.7	2.55399	0.24402	10.4663	1.23341e-25	2.71035e-24	AAEL004388	heme peroxidase [Source:VB Community Annotation]	HPX8A		GO:0004601,GO:0006979,GO:0020037,GO:0048477,GO:0055114,GO:0098869	peroxidase activity,response to oxidative stress,heme binding,oogenesis,oxidation-reduction process,cellular oxidant detoxification
LOC5579876	774.378	-2.2439	0.214486	-10.4618	1.29411e-25	2.83946e-24	AAEL005980				GO:0016020,GO:0016021	membrane,integral component of membrane
LOC5571668	472.117	-2.27341	0.217355	-10.4595	1.32608e-25	2.90524e-24	AAEL019611				GO:0003700,GO:0006357	DNA-binding transcription factor activity,regulation of transcription by RNA polymerase II
LOC110676244	548.882	-2.31078	0.221034	-10.4544	1.39882e-25	3.06e-24	AAEL027354				GO:0005975,GO:0016773	carbohydrate metabolic process,phosphotransferase activity, alcohol group as acceptor
LOC5577214	1890.47	-1.40187	0.134115	-10.4528	1.42337e-25	3.10904e-24	AAEL013098	coatomer [Source:VB Community Annotation]			GO:0000139,GO:0005198,GO:0005515,GO:0005737,GO:0005794,GO:0006886,GO:0015031,GO:0016020,GO:0016192,GO:0030117,GO:0030126	Golgi membrane,structural molecule activity,protein binding,cytoplasm,Golgi apparatus,intracellular protein transport,protein transport,membrane,vesicle-mediated transport,membrane coat,COPI vesicle coat
LOC5576176	487.501	1.36576	0.130667	10.4522	1.43108e-25	3.1212e-24	AAEL012378	serine-type protease inhibitor [Source:VB Community Annotation]			GO:0005515	protein binding
LOC5579485	195.591	2.44808	0.234236	10.4513	1.44491e-25	3.14668e-24	AAEL011012	Septin [Source:UniProtKB/TrEMBL;Acc:A0A1S4FS27]			GO:0000166,GO:0005525	nucleotide binding,GTP binding
LOC110676733	2894.56	1.97687	0.189179	10.4497	1.46948e-25	3.19065e-24	AAEL003685	Histone H3 [Source:UniProtKB/TrEMBL;Acc:Q16N56]			GO:0000786,GO:0003677,GO:0005634,GO:0046982	nucleosome,DNA binding,nucleus,protein heterodimerization activity
LOC5578783	2894.56	1.97687	0.189179	10.4497	1.46948e-25	3.19065e-24	AAEL019635	Histone H3 [Source:UniProtKB/TrEMBL;Acc:Q16N56]			GO:0000786,GO:0003677,GO:0005634,GO:0046982	nucleosome,DNA binding,nucleus,protein heterodimerization activity
LOC5568858	1442.79	2.40227	0.229998	10.4447	1.54916e-25	3.35866e-24	AAEL007171	Protein phosphatase 2c [Source:UniProtKB/TrEMBL;Acc:A0A1S4FFR8]			GO:0003824,GO:0004721,GO:0004722,GO:0006470,GO:0016787,GO:0016791,GO:0043169,GO:0046872	catalytic activity,phosphoprotein phosphatase activity,protein serine/threonine phosphatase activity,protein dephosphorylation,hydrolase activity,phosphatase activity,cation binding,metal ion binding
LOC5564255	1157.99	-1.40901	0.134958	-10.4403	1.62293e-25	3.51337e-24	AAEL004193	rhophilin [Source:VB Community Annotation]			GO:0005515,GO:0007165	protein binding,signal transduction
LOC5578475	175.811	-2.34096	0.224234	-10.4398	1.63115e-25	3.52594e-24	AAEL000508	fibrinogen and fibronectin [Source:VB Community Annotation]
LOC110679010	137.043	-3.25943	0.312302	-10.4368	1.68387e-25	3.63452e-24	AAEL027902				GO:0003676	nucleic acid binding
LOC5570897	501.531	-2.94816	0.282496	-10.4361	1.69593e-25	3.65515e-24	AAEL001493
LOC5567893	289.784	2.48329	0.237991	10.4344	1.72719e-25	3.71702e-24	AAEL006338	sulfotransferase (sult) [Source:VB Community Annotation]			GO:0008146,GO:0016740	sulfotransferase activity,transferase activity
LOC5578648	711.91	2.17617	0.208682	10.4282	1.84392e-25	3.9624e-24	AAEL013799				GO:0003676	nucleic acid binding
LOC110681072	722.287	-2.30392	0.220984	-10.4257	1.892e-25	4.05972e-24	AAEL022508				GO:0005515,GO:0005524,GO:0005694,GO:0051276	protein binding,ATP binding,chromosome,chromosome organization
LOC5573983	786.999	2.10046	0.201486	10.4248	1.90973e-25	4.09175e-24	AAEL018200				GO:0003824,GO:0016020,GO:0016021	catalytic activity,membrane,integral component of membrane
LOC5576303	449.711	1.67852	0.161117	10.418	2.05135e-25	4.38874e-24	AAEL012453
LOC5565996	201.171	2.94228	0.2825	10.4152	2.11448e-25	4.51719e-24	AAEL015042				GO:0000795,GO:0007131,GO:0019789,GO:0046872	synaptonemal complex,reciprocal meiotic recombination,SUMO transferase activity,metal ion binding
LOC5571138	1302.95	1.3166	0.126453	10.4118	2.1902e-25	4.67211e-24	AAEL008833
LOC5564140	920.347	-1.36726	0.131335	-10.4105	2.22147e-25	4.73189e-24	AAEL004083	WD-repeat protein [Source:VB Community Annotation]			GO:0005515	protein binding
LOC5570078	861.466	-2.21423	0.212699	-10.4102	2.22811e-25	4.73912e-24	AAEL018214				GO:0005085,GO:0005089,GO:0005856,GO:0005912,GO:0008092,GO:0030054,GO:0035023	guanyl-nucleotide exchange factor activity,Rho guanyl-nucleotide exchange factor activity,cytoskeleton,adherens junction,cytoskeletal protein binding,cell junction,regulation of Rho protein signal transduction
LOC5578281	660.793	-1.73689	0.166854	-10.4097	2.23952e-25	4.75646e-24	AAEL013600	integrin alpha-ps [Source:VB Community Annotation]			GO:0007155,GO:0007229,GO:0008305,GO:0016020,GO:0016021	cell adhesion,integrin-mediated signaling pathway,integrin complex,membrane,integral component of membrane
LOC5575731	3263.96	-2.10967	0.202708	-10.4075	2.29266e-25	4.86225e-24	AAEL012039	zinc finger protein [Source:VB Community Annotation]			GO:0000977,GO:0003676,GO:0003677,GO:0005634,GO:0006357,GO:0046872	RNA polymerase II transcription regulatory region sequence-specific DNA binding,nucleic acid binding,DNA binding,nucleus,regulation of transcription by RNA polymerase II,metal ion binding
LOC5570859	286.799	2.64606	0.254277	10.4062	2.32267e-25	4.91874e-24	AAEL027367				GO:0000166,GO:0005524,GO:0016020,GO:0016021,GO:0016887,GO:0042626	nucleotide binding,ATP binding,membrane,integral component of membrane,ATPase activity,ATPase-coupled transmembrane transporter activity
LOC5575790	6246.32	-1.17381	0.112819	-10.4043	2.36986e-25	5.01139e-24	AAEL012062	Na+/K+ ATPase alpha subunit [Source:VB Community Annotation]			GO:0000166,GO:0005524,GO:0006811,GO:0006813,GO:0008556,GO:0016020,GO:0016021,GO:0046872,GO:0071805	nucleotide binding,ATP binding,ion transport,potassium ion transport,potassium transmembrane transporter activity, phosphorylative mechanism,membrane,integral component of membrane,metal ion binding,potassium ion transmembrane transport
LOC5578779	3774.31	3.41718	0.328636	10.3981	2.53049e-25	5.33561e-24	AAEL003706	Histone H2A [Source:UniProtKB/TrEMBL;Acc:Q17ER8]			GO:0000786,GO:0003677,GO:0005634,GO:0005694,GO:0046982	nucleosome,DNA binding,nucleus,chromosome,protein heterodimerization activity
LOC5578782	3774.31	3.41718	0.328636	10.3981	2.53049e-25	5.33561e-24	AAEL003706	Histone H2A [Source:UniProtKB/TrEMBL;Acc:Q17ER8]			GO:0000786,GO:0003677,GO:0005634,GO:0005694,GO:0046982	nucleosome,DNA binding,nucleus,chromosome,protein heterodimerization activity
LOC110676230	832.647	-1.46778	0.141226	-10.3931	2.66422e-25	5.60947e-24	AAEL023044
LOC5568465	23028.5	1.5549	0.149647	10.3905	2.7391e-25	5.75883e-24	AAEL006860	40S ribosomal protein S28 [Source:UniProtKB/TrEMBL;Acc:Q1HR28]	RpS28		GO:0003735,GO:0005840,GO:0006412	structural constituent of ribosome,ribosome,translation
LOC5565156	171.651	3.35216	0.322839	10.3834	2.95073e-25	6.19484e-24	AAEL004616	actin [Source:VB Community Annotation]			GO:0005524,GO:0005737,GO:0005856	ATP binding,cytoplasm,cytoskeleton
LOC5566228	24436.4	1.17854	0.113552	10.3788	3.09657e-25	6.4851e-24	AAEL005266	40S ribosomal protein S14 [Source:UniProtKB/Swiss-Prot;Acc:Q1HR24]	RpS14		GO:0003674,GO:0003735,GO:0005575,GO:0005840,GO:0006412,GO:0008150	molecular_function,structural constituent of ribosome,cellular_component,ribosome,translation,biological_process
LOC5570056	103.592	3.92581	0.378254	10.3788	3.09788e-25	6.4851e-24	AAEL023428
LOC5580029	983.121	1.73578	0.167319	10.3741	3.25222e-25	6.79844e-24	AAEL009654
LOC5574614	10043.1	-2.43101	0.234502	-10.3667	3.51425e-25	7.33569e-24	AAEL011248	innexin [Source:VB Community Annotation]	inx3		GO:0005886,GO:0005921,GO:0006811,GO:0016020,GO:0016021,GO:0030054	plasma membrane,gap junction,ion transport,membrane,integral component of membrane,cell junction
LOC5572863	1274.02	1.7778	0.171514	10.3654	3.56361e-25	7.42808e-24	AAEL010081				GO:0003824,GO:0005783,GO:0005789,GO:0006506,GO:0016020,GO:0016021,GO:0016740,GO:0051377	catalytic activity,endoplasmic reticulum,endoplasmic reticulum membrane,GPI anchor biosynthetic process,membrane,integral component of membrane,transferase activity,mannose-ethanolamine phosphotransferase activity
LOC5579484	408.012	2.10491	0.203135	10.3621	3.687e-25	7.67433e-24	AAEL015298				GO:0016020,GO:0016021,GO:0016787	membrane,integral component of membrane,hydrolase activity
LOC5565484	116.022	-4.39995	0.424827	-10.357	3.88808e-25	8.08134e-24	AAEL004814	potassium-dependent sodium-calcium exchanger, putative [Source:VB Community Annotation]			GO:0006816,GO:0015297,GO:0016020,GO:0016021,GO:0055085	calcium ion transport,antiporter activity,membrane,integral component of membrane,transmembrane transport
LOC5580003	587.164	1.74864	0.168844	10.3565	3.90899e-25	8.11324e-24	AAEL009639	Ubiquitin-like protein [Source:UniProtKB/TrEMBL;Acc:A0A1S4FN23]			GO:0005515,GO:0005886,GO:0016020	protein binding,plasma membrane,membrane
LOC5564014	250.703	3.04946	0.294658	10.3491	4.22278e-25	8.75206e-24	AAEL014276				GO:0017053	transcription repressor complex
LOC5574643	1840.55	-1.08339	0.104821	-10.3356	4.86275e-25	1.00642e-23	AAEL011282	ribosomal RNA small subunit methyltransferase b (sun) [Source:VB Community Annotation]			GO:0001510,GO:0003723,GO:0005730,GO:0006364,GO:0006396,GO:0008168,GO:0008757,GO:0016740,GO:0032259,GO:0042254	RNA methylation,RNA binding,nucleolus,rRNA processing,RNA processing,methyltransferase activity,S-adenosylmethionine-dependent methyltransferase activity,transferase activity,methylation,ribosome biogenesis
LOC5565603	763.712	1.27296	0.123165	10.3353	4.87665e-25	1.00786e-23	AAEL004892				GO:0003676,GO:0005634,GO:0008270,GO:0046872	nucleic acid binding,nucleus,zinc ion binding,metal ion binding
LOC5577416	268.89	2.00976	0.194488	10.3336	4.96703e-25	1.02509e-23	AAEL003171
LOC5564265	2114.71	-2.73473	0.264772	-10.3286	5.22919e-25	1.07767e-23	AAEL027694				GO:0004252,GO:0005044,GO:0005515,GO:0006508,GO:0006897,GO:0016020,GO:0016021	serine-type endopeptidase activity,scavenger receptor activity,protein binding,proteolysis,endocytosis,membrane,integral component of membrane
LOC5578759	622.922	1.62508	0.157383	10.3256	5.3968e-25	1.11064e-23	AAEL003666	leukotriene a-4 hydrolase [Source:VB Community Annotation]			GO:0004177,GO:0004463,GO:0005737,GO:0006508,GO:0008233,GO:0008237,GO:0008270,GO:0016787,GO:0019370,GO:0046872	aminopeptidase activity,leukotriene-A4 hydrolase activity,cytoplasm,proteolysis,peptidase activity,metallopeptidase activity,zinc ion binding,hydrolase activity,leukotriene biosynthetic process,metal ion binding
LOC5578608	2001.89	1.31428	0.127308	10.3237	5.50697e-25	1.13172e-23	AAEL027860	caspar [Source:VB Community Annotation]	casp		GO:0005515	protein binding
LOC5564684	7937.68	1.56967	0.1521	10.32	5.72449e-25	1.17477e-23	AAEL004386	chorion peroxidase [Source:VB Community Annotation]	pxt	HPX8C	GO:0004601,GO:0005576,GO:0006979,GO:0007306,GO:0016491,GO:0020037,GO:0042743,GO:0042744,GO:0046872,GO:0048477,GO:0055114,GO:0098869	peroxidase activity,extracellular region,response to oxidative stress,eggshell chorion assembly,oxidoreductase activity,heme binding,hydrogen peroxide metabolic process,hydrogen peroxide catabolic process,metal ion binding,oogenesis,oxidation-reduction process,cellular oxidant detoxification
LOC5577676	792.78	2.43402	0.235881	10.3189	5.79024e-25	1.18659e-23	AAEL019434				GO:0003676,GO:0004721,GO:0004725,GO:0006470,GO:0008138,GO:0016311,GO:0016787,GO:0016791,GO:0035335	nucleic acid binding,phosphoprotein phosphatase activity,protein tyrosine phosphatase activity,protein dephosphorylation,protein tyrosine/serine/threonine phosphatase activity,dephosphorylation,hydrolase activity,phosphatase activity,peptidyl-tyrosine dephosphorylation
LOC5577036	2826.18	-2.36206	0.229006	-10.3144	6.0664e-25	1.24144e-23	AAEL025455				GO:0000123,GO:0005515,GO:0005634,GO:0016301,GO:0016310,GO:0016573,GO:0016740	histone acetyltransferase complex,protein binding,nucleus,kinase activity,phosphorylation,histone acetylation,transferase activity
LOC5568973	300.662	1.57674	0.153169	10.2941	7.48909e-25	1.53044e-23	AAEL007257				GO:0003676,GO:0005634,GO:0008270,GO:0046872	nucleic acid binding,nucleus,zinc ion binding,metal ion binding
LOC5566123	3059.44	-2.92061	0.283799	-10.2911	7.7295e-25	1.57736e-23	AAEL005187	laminin gamma 1 chain [Source:VB Community Annotation]
LOC5576555	10264.6	-1.73339	0.168509	-10.2866	8.09771e-25	1.65019e-23	AAEL012616	NADP transhydrogenase [Source:VB Community Annotation]			GO:0008746,GO:0016020,GO:0016021,GO:0016491,GO:0055114,GO:1902600	NAD(P)+ transhydrogenase activity,membrane,integral component of membrane,oxidoreductase activity,oxidation-reduction process,proton transmembrane transport
LOC5569670	16958.5	1.30086	0.126488	10.2845	8.27675e-25	1.68433e-23	AAEL007824	40S ribosomal protein S29 [Source:UniProtKB/TrEMBL;Acc:Q1HRA1]	RpS29		GO:0003735,GO:0005783,GO:0005791,GO:0005829,GO:0005840,GO:0006412,GO:0008270	structural constituent of ribosome,endoplasmic reticulum,rough endoplasmic reticulum,cytosol,ribosome,translation,zinc ion binding
LOC5579887	498.08	1.36342	0.132901	10.2589	1.07914e-24	2.193e-23	AAEL001024	mitochondrial carrier protein [Source:VB Community Annotation]			GO:0016020,GO:0016021,GO:0022857	membrane,integral component of membrane,transmembrane transporter activity
LOC5564428	169.813	-2.07502	0.202314	-10.2564	1.10727e-24	2.24703e-23	AAEL014435	juvenile hormone-inducible protein, putative [Source:VB Community Annotation]
LOC5578290	746.232	1.26709	0.123564	10.2545	1.12935e-24	2.28867e-23	AAEL023159				GO:0005246,GO:0005515,GO:0006811,GO:0006816,GO:0016020,GO:0016021,GO:0046872	calcium channel regulator activity,protein binding,ion transport,calcium ion transport,membrane,integral component of membrane,metal ion binding
LOC5566824	483.108	-2.51161	0.244972	-10.2527	1.15122e-24	2.32974e-23	AAEL022609				GO:0001952,GO:0005515,GO:0015629,GO:0051371	regulation of cell-matrix adhesion,protein binding,actin cytoskeleton,muscle alpha-actinin binding
LOC5576552	575.707	2.16037	0.210741	10.2513	1.1672e-24	2.35882e-23	AAEL012610
LOC5572825	1672.1	-2.58294	0.251972	-10.2509	1.17209e-24	2.36542e-23	AAEL001912	forkhead protein/ forkhead protein domain [Source:VB Community Annotation]			GO:0003677,GO:0003700,GO:0005634,GO:0006355,GO:0007275,GO:0043565	DNA binding,DNA-binding transcription factor activity,nucleus,regulation of transcription, DNA-templated,multicellular organism development,sequence-specific DNA binding
LOC5564045	308.048	-1.87894	0.183457	-10.2418	1.28783e-24	2.59541e-23	AAEL004076	Ubiquitin-like modifier-activating enzyme 5 (Ubiquitin-activating enzyme 5) [Source:VB Community Annotation]			GO:0000166,GO:0005524,GO:0008641,GO:0046872	nucleotide binding,ATP binding,ubiquitin-like modifier activating enzyme activity,metal ion binding
LOC110676735	1069.34	2.50486	0.24463	10.2393	1.32132e-24	2.65922e-23	AAEL003673	Histone H4 [Source:UniProtKB/TrEMBL;Acc:Q16IE4]
LOC5575327	105.129	2.79494	0.272976	10.2388	1.32879e-24	2.67058e-23	AAEL020706				GO:0004252,GO:0006508	serine-type endopeptidase activity,proteolysis
LOC5578784	1065.4	2.50482	0.244778	10.233	1.41031e-24	2.83052e-23	AAEL021350	Histone H4 [Source:UniProtKB/TrEMBL;Acc:Q16IE4]			GO:0000786,GO:0003677,GO:0005634,GO:0005694,GO:0006352,GO:0042025,GO:0046982	nucleosome,DNA binding,nucleus,chromosome,DNA-templated transcription, initiation,host cell nucleus,protein heterodimerization activity
LOC5576840	2060.99	-1.42369	0.139174	-10.2296	1.46073e-24	2.92769e-23	AAEL012825	bifunctional purine biosynthesis protein [Source:VB Community Annotation]			GO:0003824,GO:0003937,GO:0004643,GO:0006164,GO:0006189,GO:0008152,GO:0016740,GO:0016787	catalytic activity,IMP cyclohydrolase activity,phosphoribosylaminoimidazolecarboxamide formyltransferase activity,purine nucleotide biosynthetic process,'de novo' IMP biosynthetic process,metabolic process,transferase activity,hydrolase activity
LOC5572119	710.116	1.62639	0.159026	10.2272	1.49781e-24	2.99789e-23	AAEL009539	acyl-protein thioesterase 1,2 (lysophospholipase i,ii) [Source:VB Community Annotation]			GO:0016787	hydrolase activity
LOC5569696	2952.37	-1.58006	0.154609	-10.2197	1.61786e-24	3.23373e-23	AAEL007842				GO:0000139,GO:0005789,GO:0005794,GO:0005886,GO:0010008,GO:0016020,GO:0016021,GO:0016055,GO:0017147,GO:0042734,GO:0042995,GO:0045211	Golgi membrane,endoplasmic reticulum membrane,Golgi apparatus,plasma membrane,endosome membrane,membrane,integral component of membrane,Wnt signaling pathway,Wnt-protein binding,presynaptic membrane,cell projection,postsynaptic membrane
LOC5575353	2288.54	-2.36993	0.232116	-10.2101	1.78721e-24	3.56733e-23	AAEL002583	Toll-like receptor [Source:VB Community Annotation]	TOLL7		GO:0005515,GO:0007165,GO:0016020,GO:0016021,GO:0045087	protein binding,signal transduction,membrane,integral component of membrane,innate immune response
LOC5568405	620.592	-1.71435	0.16794	-10.2081	1.82405e-24	3.63588e-23	AAEL006832	GPCR Frizzled/Smoothened Family [Source:VB Community Annotation]	GPRFZ3		GO:0004888,GO:0005515,GO:0007166,GO:0016020,GO:0016021	transmembrane signaling receptor activity,protein binding,cell surface receptor signaling pathway,membrane,integral component of membrane
LOC5564548	232.022	2.36459	0.231724	10.2043	1.89652e-24	3.77518e-23	AAEL004316
LOC5576601	329.227	-1.78132	0.174669	-10.1983	2.01785e-24	4.01123e-23	AAEL002943	che-11 [Source:VB Community Annotation]			GO:0005515	protein binding
LOC5578356	821.196	1.48969	0.146076	10.198	2.02324e-24	4.01648e-23	AAEL003519				GO:0003700,GO:0005634,GO:0005789,GO:0006355,GO:0030968,GO:0035497,GO:0045944	DNA-binding transcription factor activity,nucleus,endoplasmic reticulum membrane,regulation of transcription, DNA-templated,endoplasmic reticulum unfolded protein response,cAMP response element binding,positive regulation of transcription by RNA polymerase II
LOC110674372	87.648	3.41156	0.334575	10.1967	2.05106e-24	4.06617e-23	AAEL020862
LOC5575774	1011.98	2.43604	0.238959	10.1944	2.10059e-24	4.15872e-23	AAEL002711
LOC5578126	15618.7	2.43273	0.238653	10.1936	2.11817e-24	4.18784e-23	AAEL020073				GO:0003723,GO:0005515,GO:0006355,GO:0006417,GO:0017148,GO:0030371,GO:0043488	RNA binding,protein binding,regulation of transcription, DNA-templated,regulation of translation,negative regulation of translation,translation repressor activity,regulation of mRNA stability
LOC5564551	1903.44	-2.55878	0.251157	-10.188	2.24411e-24	4.43083e-23	AAEL004326
LOC5567423	963.216	1.76819	0.173563	10.1876	2.25301e-24	4.44239e-23	AAEL006070	Phosphoglycerate mutase [Source:UniProtKB/TrEMBL;Acc:Q177P3]			GO:0003824,GO:0004082,GO:0004619,GO:0006096,GO:0016853,GO:0016868	catalytic activity,bisphosphoglycerate mutase activity,phosphoglycerate mutase activity,glycolytic process,isomerase activity,intramolecular transferase activity, phosphotransferases
LOC110678949	14210.7	-1.07826	0.105877	-10.1841	2.33431e-24	4.59647e-23	AAEL022104	Ribosomal protein L3 [Source:UniProtKB/TrEMBL;Acc:Q1HR77]			GO:0003735,GO:0005840,GO:0006412	structural constituent of ribosome,ribosome,translation
LOC5578985	288.283	3.11451	0.306106	10.1746	2.57431e-24	5.06222e-23	AAEL003797
LOC5577062	472.984	-2.44801	0.240607	-10.1743	2.58177e-24	5.07006e-23	AAEL026027				GO:0004857,GO:0004867,GO:0005576,GO:0010466,GO:0010951,GO:0030414,GO:0043086	enzyme inhibitor activity,serine-type endopeptidase inhibitor activity,extracellular region,negative regulation of peptidase activity,negative regulation of endopeptidase activity,peptidase inhibitor activity,negative regulation of catalytic activity
LOC5564518	16443.2	-1.80544	0.177484	-10.1724	2.63396e-24	5.16561e-23	AAEL019716				GO:0005634,GO:0005737,GO:0005819	nucleus,cytoplasm,spindle
LOC5565894	1950.79	-1.39782	0.137448	-10.1698	2.70437e-24	5.29658e-23	AAEL020638				GO:0000166,GO:0004674,GO:0005515,GO:0005524,GO:0006468,GO:0016301,GO:0016310,GO:0016740,GO:0044877	nucleotide binding,protein serine/threonine kinase activity,protein binding,ATP binding,protein phosphorylation,kinase activity,phosphorylation,transferase activity,protein-containing complex binding
LOC110679326	201.642	3.65812	0.359775	10.1678	2.7605e-24	5.39926e-23	AAEL025296
LOC5579977	395.374	1.50615	0.14831	10.1554	3.13507e-24	6.12367e-23	AAEL007738	app binding protein [Source:VB Community Annotation]			GO:0008641,GO:0019781,GO:0045116	ubiquitin-like modifier activating enzyme activity,NEDD8 activating enzyme activity,protein neddylation
LOC5571927	26527.6	1.34425	0.13245	10.1491	3.3459e-24	6.52675e-23	AAEL020290	60S ribosomal protein L39 [Source:UniProtKB/TrEMBL;Acc:Q1HRB5]			GO:0003735,GO:0005840,GO:0006412	structural constituent of ribosome,ribosome,translation
LOC5574311	11847	-2.09299	0.206284	-10.1462	3.44638e-24	6.71377e-23	AAEL011069				GO:0005515,GO:0005737,GO:0035556	protein binding,cytoplasm,intracellular signal transduction
LOC5570057	336.283	1.78397	0.175855	10.1445	3.50493e-24	6.81873e-23	AAEL000184
LOC5577897	391.09	-2.68172	0.264561	-10.1365	3.80613e-24	7.39484e-23	AAEL003345	argininosuccinate lyase [Source:VB Community Annotation]			GO:0003824,GO:0004056,GO:0042450	catalytic activity,argininosuccinate lyase activity,arginine biosynthetic process via ornithine
LOC5572140	104.603	-4.06873	0.401411	-10.1361	3.82154e-24	7.41491e-23	AAEL022562				GO:0004252,GO:0006508	serine-type endopeptidase activity,proteolysis
LOC5563797	79.3147	-5.19096	0.512137	-10.1359	3.82957e-24	7.42061e-23	AAEL014125	nk homeobox protein [Source:VB Community Annotation]			GO:0000981,GO:0003677,GO:0005634,GO:0006355,GO:0006357,GO:0043565	DNA-binding transcription factor activity, RNA polymerase II-specific,DNA binding,nucleus,regulation of transcription, DNA-templated,regulation of transcription by RNA polymerase II,sequence-specific DNA binding
LOC5573864	1280.33	1.18982	0.117435	10.1317	3.99702e-24	7.73482e-23	AAEL010788	metalloprotease [Source:VB Community Annotation]			GO:0004222,GO:0006508,GO:0008233,GO:0008237,GO:0008270,GO:0016787,GO:0046872	metalloendopeptidase activity,proteolysis,peptidase activity,metallopeptidase activity,zinc ion binding,hydrolase activity,metal ion binding
LOC5577909	1564.62	2.29205	0.22623	10.1315	4.00358e-24	7.73725e-23	AAEL003355				GO:0003676	nucleic acid binding
LOC5564097	1161.88	-3.12215	0.308239	-10.129	4.10924e-24	7.92895e-23	AAEL014318				GO:0016020,GO:0016021	membrane,integral component of membrane
LOC5573409	1743.46	1.53352	0.151401	10.1289	4.11364e-24	7.92895e-23	AAEL026571
LOC5565066	95.776	-2.86013	0.282536	-10.1231	4.36503e-24	8.4024e-23	AAEL004580	beta-galactosidase [Source:VB Community Annotation]			GO:0004553,GO:0004565,GO:0005975,GO:0008152,GO:0016020,GO:0016021,GO:0016787,GO:0016798	hydrolase activity, hydrolyzing O-glycosyl compounds,beta-galactosidase activity,carbohydrate metabolic process,metabolic process,membrane,integral component of membrane,hydrolase activity,hydrolase activity, acting on glycosyl bonds
LOC5570368	1462.32	-1.72148	0.170065	-10.1225	4.39127e-24	8.44177e-23	AAEL008260				GO:0000981,GO:0003677,GO:0005634,GO:0006355,GO:0006357,GO:0043565	DNA-binding transcription factor activity, RNA polymerase II-specific,DNA binding,nucleus,regulation of transcription, DNA-templated,regulation of transcription by RNA polymerase II,sequence-specific DNA binding
LOC5577709	103.306	-2.755	0.272283	-10.1181	4.59113e-24	8.81437e-23	AAEL013349	lethal(2)essential for life protein, l2efl [Source:VB Community Annotation]			GO:0046872	metal ion binding
LOC5574727	694.819	-2.50294	0.247573	-10.1099	4.99217e-24	9.57171e-23	AAEL011365				GO:0005515,GO:0005856	protein binding,cytoskeleton
LOC5578895	1311.42	1.41257	0.139862	10.0997	5.53951e-24	1.06072e-22	AAEL013897	n-acetylglucosaminyltransferase vi [Source:VB Community Annotation]
LOC5573646	383.821	2.32875	0.230804	10.0897	6.13378e-24	1.17298e-22	AAEL023212				GO:0000786,GO:0003677,GO:0006334,GO:0042025	nucleosome,DNA binding,nucleosome assembly,host cell nucleus
LOC5575910	500.628	1.48251	0.146949	10.0886	6.20449e-24	1.18494e-22	AAEL012154	2,3-cyclic-nucleotide 2-phosphodiesterase [Source:VB Community Annotation]			GO:0000166,GO:0009166,GO:0016787	nucleotide binding,nucleotide catabolic process,hydrolase activity
LOC5578908	80.3906	4.07588	0.404044	10.0877	6.2624e-24	1.19444e-22	AAEL013912	Fatty acyl-CoA reductase [Source:UniProtKB/TrEMBL;Acc:A0A1S4G0R7]			GO:0006629,GO:0016020,GO:0016021,GO:0016491,GO:0055114,GO:0080019,GO:0102965	lipid metabolic process,membrane,integral component of membrane,oxidoreductase activity,oxidation-reduction process,fatty-acyl-CoA reductase (alcohol-forming) activity,alcohol-forming fatty acyl-CoA reductase activity
LOC5572580	516.566	-1.63549	0.16213	-10.0875	6.27637e-24	1.19554e-22	AAEL009899				GO:0016020,GO:0016021	membrane,integral component of membrane
LOC5571506	779.648	1.53009	0.151762	10.0822	6.6249e-24	1.26029e-22	AAEL019988				GO:0004930,GO:0007165,GO:0007186,GO:0016020,GO:0016021	G protein-coupled receptor activity,signal transduction,G protein-coupled receptor signaling pathway,membrane,integral component of membrane
LOC5575611	2302.36	-2.42957	0.24098	-10.082	6.63542e-24	1.26064e-22	AAEL027674				GO:0003677,GO:0005634,GO:0006355,GO:0046983	DNA binding,nucleus,regulation of transcription, DNA-templated,protein dimerization activity
LOC5574553	801.741	-2.34755	0.23287	-10.0809	6.70765e-24	1.27271e-22	AAEL011227				GO:0005515	protein binding
LOC5572069	292.102	2.43449	0.241499	10.0807	6.72185e-24	1.27375e-22	AAEL027566				GO:0000166,GO:0004672,GO:0004674,GO:0004675,GO:0005524,GO:0006468,GO:0007178,GO:0016020,GO:0016021,GO:0016301,GO:0016310,GO:0016740,GO:0046872	nucleotide binding,protein kinase activity,protein serine/threonine kinase activity,transmembrane receptor protein serine/threonine kinase activity,ATP binding,protein phosphorylation,transmembrane receptor protein serine/threonine kinase signaling pathway,membrane,integral component of membrane,kinase activity,phosphorylation,transferase activity,metal ion binding
LOC5571846	16006.8	1.08632	0.10782	10.0753	7.10271e-24	1.34417e-22	AAEL023681
LOC5571661	772.644	-1.2359	0.122704	-10.0722	7.33115e-24	1.38561e-22	AAEL001657	DEAD box ATP-dependent RNA helicase [Source:VB Community Annotation]			GO:0000166,GO:0003676,GO:0003724,GO:0004386,GO:0005524,GO:0016787	nucleotide binding,nucleic acid binding,RNA helicase activity,helicase activity,ATP binding,hydrolase activity
LOC5574026	187.275	2.37794	0.23616	10.0692	7.55916e-24	1.42584e-22	AAEL010867	serine protease [Source:VB Community Annotation]			GO:0004252,GO:0006508,GO:0008233,GO:0008236,GO:0016787	serine-type endopeptidase activity,proteolysis,peptidase activity,serine-type peptidase activity,hydrolase activity
LOC5569768	215.18	-2.83624	0.281677	-10.0691	7.56359e-24	1.42584e-22	AAEL007897	spaetzle-like cytokine [Source:VB Community Annotation]	SPZ4		GO:0016020,GO:0016021	membrane,integral component of membrane
LOC110678777	693.092	1.55071	0.154009	10.069	7.57657e-24	1.42645e-22	AAEL022628
LOC5566777	2938.31	-2.07138	0.205738	-10.0681	7.64777e-24	1.438e-22	AAEL024210				GO:0005515,GO:0007275	protein binding,multicellular organism development
LOC5579113	592.369	1.61066	0.15999	10.0672	7.71117e-24	1.44805e-22	AAEL003817	kappa b-ras [Source:VB Community Annotation]			GO:0003924,GO:0005525,GO:0007165,GO:0007249,GO:0016020	GTPase activity,GTP binding,signal transduction,I-kappaB kinase/NF-kappaB signaling,membrane
LOC5570383	2728.54	-2.38469	0.236959	-10.0637	7.99153e-24	1.49877e-22	AAEL008262	ppa (fragment) [Source:VB Community Annotation]			GO:0005515	protein binding
LOC5569604	2508.13	-1.59635	0.15871	-10.0583	8.44271e-24	1.58136e-22	AAEL001275	ef-hand protein nucb1 [Source:VB Community Annotation]			GO:0005509	calcium ion binding
LOC5580212	95.8658	-3.41017	0.339304	-10.0505	9.14131e-24	1.71001e-22	AAEL011926	brachyury [Source:VB Community Annotation]			GO:0003677,GO:0003700,GO:0005634,GO:0006355	DNA binding,DNA-binding transcription factor activity,nucleus,regulation of transcription, DNA-templated
LOC5566203	2129.67	-3.52603	0.350837	-10.0503	9.15592e-24	1.71055e-22	AAEL018334				GO:0000166,GO:0005524,GO:0016020,GO:0016021,GO:0016887,GO:0043190,GO:0055085	nucleotide binding,ATP binding,membrane,integral component of membrane,ATPase activity,ATP-binding cassette (ABC) transporter complex,transmembrane transport
LOC5579514	3132.81	-0.980319	0.0975542	-10.049	9.28398e-24	1.73226e-22	AAEL015100	calnexin [Source:VB Community Annotation]			GO:0005509,GO:0005515,GO:0005783,GO:0006457,GO:0016020,GO:0016021,GO:0051082	calcium ion binding,protein binding,endoplasmic reticulum,protein folding,membrane,integral component of membrane,unfolded protein binding
LOC5576819	2057.32	-1.25791	0.125189	-10.048	9.37293e-24	1.74662e-22	AAEL019629
LOC110681492	71.9519	3.71687	0.369955	10.0468	9.48917e-24	1.76378e-22	AAEL024960
LOC5578979	71.9519	3.71687	0.369955	10.0468	9.48917e-24	1.76378e-22	AAEL021797
LOC5573444	3234.45	-1.41692	0.141038	-10.0464	9.52964e-24	1.76905e-22	AAEL010488	ets [Source:VB Community Annotation]			GO:0000122,GO:0001709,GO:0003677,GO:0003700,GO:0005634,GO:0006355,GO:0042025,GO:0043565,GO:0045596,GO:0045892	negative regulation of transcription by RNA polymerase II,cell fate determination,DNA binding,DNA-binding transcription factor activity,nucleus,regulation of transcription, DNA-templated,host cell nucleus,sequence-specific DNA binding,negative regulation of cell differentiation,negative regulation of transcription, DNA-templated
LOC5573767	1780.64	-2.02104	0.201292	-10.0404	1.01304e-23	1.87818e-22	AAEL000281				GO:0016020,GO:0016021	membrane,integral component of membrane
LOC5574632	150.843	-2.80392	0.279281	-10.0398	1.01902e-23	1.88686e-22	AAEL024576				GO:0005515,GO:0005886,GO:0007155,GO:0007411,GO:0016020,GO:0016021	protein binding,plasma membrane,cell adhesion,axon guidance,membrane,integral component of membrane
LOC5576199	601.728	1.46845	0.146272	10.0392	1.02493e-23	1.8954e-22	AAEL012387				GO:0005515	protein binding
LOC5577243	666.087	-1.14368	0.113941	-10.0375	1.04297e-23	1.92633e-22	AAEL003127	WD-repeat protein [Source:VB Community Annotation]			GO:0005515	protein binding
LOC5567068	2181.89	-1.29163	0.128714	-10.0348	1.07151e-23	1.97653e-22	AAEL005798	ATP synthase subunit beta vacuolar [Source:VB Community Annotation]			GO:0005524,GO:0006811,GO:0015991,GO:0033180,GO:0046034,GO:1902600	ATP binding,ion transport,GO_0015991,proton-transporting V-type ATPase, V1 domain,ATP metabolic process,proton transmembrane transport
LOC5564562	1119.98	1.7783	0.177241	10.0332	1.08943e-23	2.00706e-22	AAEL004305
LOC5570355	1232.77	-1.95467	0.19483	-10.0327	1.09446e-23	2.01379e-22	AAEL001368	kek1 [Source:VB Community Annotation]			GO:0005515,GO:0016020,GO:0016021	protein binding,membrane,integral component of membrane
LOC5569281	796.546	1.15213	0.114869	10.03	1.12565e-23	2.06855e-22	AAEL007526	electron transfer flavoprotein-ubiquinone oxidoreductase [Source:VB Community Annotation]			GO:0004174,GO:0016491,GO:0022900,GO:0022904,GO:0046872,GO:0051536,GO:0051539,GO:0055114	electron-transferring-flavoprotein dehydrogenase activity,oxidoreductase activity,electron transport chain,respiratory electron transport chain,metal ion binding,iron-sulfur cluster binding,4 iron, 4 sulfur cluster binding,oxidation-reduction process
LOC5566091	446.993	-2.58367	0.257671	-10.027	1.15961e-23	2.12828e-22	AAEL005160	sulphate transporter [Source:VB Community Annotation]			GO:0008271,GO:0008272,GO:0015116,GO:0016020,GO:0016021,GO:0055085,GO:1902358	secondary active sulfate transmembrane transporter activity,sulfate transport,sulfate transmembrane transporter activity,membrane,integral component of membrane,transmembrane transport,sulfate transmembrane transport
LOC5569443	178.601	-2.53548	0.253071	-10.0189	1.25951e-23	2.30874e-22	AAEL001232	tubulointerstitial nephritis antigen [Source:VB Community Annotation]			GO:0005044,GO:0006508,GO:0006955,GO:0008234,GO:0030247	scavenger receptor activity,proteolysis,immune response,cysteine-type peptidase activity,polysaccharide binding
LOC110676307	918.005	-2.75495	0.275613	-9.99572	1.59134e-23	2.91332e-22	AAEL025437				GO:0016491,GO:0055114	oxidoreductase activity,oxidation-reduction process
LOC5578329	121.794	-4.5611	0.456494	-9.99159	1.65904e-23	3.03347e-22	AAEL013649	elongase, putative [Source:VB Community Annotation]			GO:0006629,GO:0006631,GO:0006633,GO:0016020,GO:0016021,GO:0016740,GO:0102336,GO:0102337,GO:0102338,GO:0102756	lipid metabolic process,fatty acid metabolic process,fatty acid biosynthetic process,membrane,integral component of membrane,transferase activity,3-oxo-arachidoyl-CoA synthase activity,3-oxo-cerotoyl-CoA synthase activity,3-oxo-lignoceronyl-CoA synthase activity,very-long-chain 3-ketoacyl-CoA synthase activity
LOC5564078	1738.16	1.21462	0.121626	9.98649	1.74658e-23	3.18953e-22	AAEL014296	major sperm protein [Source:VB Community Annotation]			GO:0016020,GO:0016021	membrane,integral component of membrane
LOC23687660	10876.1	-1.13282	0.11345	-9.98519	1.76953e-23	3.2274e-22	AAEL021255				GO:0003677,GO:0005515,GO:0005634	DNA binding,protein binding,nucleus
LOC5569466	8778.36	-0.826676	0.0828106	-9.98273	1.81409e-23	3.30454e-22	AAEL007662	casein kinase [Source:VB Community Annotation]			GO:0000166,GO:0004672,GO:0004674,GO:0005524,GO:0006468	nucleotide binding,protein kinase activity,protein serine/threonine kinase activity,ATP binding,protein phosphorylation
LOC5571934	441.772	1.67888	0.168216	9.98053	1.85478e-23	3.37444e-22	AAEL018178				GO:0016491,GO:0055114	oxidoreductase activity,oxidation-reduction process
LOC5569552	512.695	1.38764	0.139114	9.97484	1.96413e-23	3.56895e-22	AAEL019980				GO:0016020	membrane
LOC5571502	385.605	1.90889	0.191578	9.96407	2.18907e-23	3.97273e-22	AAEL001601				GO:0016020,GO:0016021	membrane,integral component of membrane
LOC5563572	786.635	2.19931	0.220895	9.95639	2.36497e-23	4.28662e-22	AAEL000053	myotubularin [Source:VB Community Annotation]
LOC5569017	307.049	-2.58426	0.259596	-9.95493	2.4e-23	4.34471e-22	AAEL007303				GO:0002039,GO:0018024,GO:0034968	p53 binding,histone-lysine N-methyltransferase activity,histone lysine methylation
LOC5576242	918.956	2.07295	0.208331	9.9503	2.51415e-23	4.54573e-22	AAEL002835
LOC5564182	312.834	-3.11856	0.313639	-9.94315	2.70153e-23	4.87847e-22	AAEL004146	cryptochrome 1 [Source:VB Community Annotation]	CRY1		GO:0000166,GO:0005634,GO:0005641,GO:0005737,GO:0009785,GO:0009881,GO:0009882,GO:0018298,GO:0042752,GO:0045892,GO:0048471,GO:0048511,GO:0050660,GO:0050896	nucleotide binding,nucleus,nuclear envelope lumen,cytoplasm,blue light signaling pathway,photoreceptor activity,blue light photoreceptor activity,protein-chromophore linkage,regulation of circadian rhythm,negative regulation of transcription, DNA-templated,perinuclear region of cytoplasm,rhythmic process,flavin adenine dinucleotide binding,response to stimulus
LOC5574341	684.854	1.27736	0.12848	9.94207	2.73101e-23	4.92562e-22	AAEL002329	alpha-1,3-mannosyl-glycoprotein beta-1, 2-n-acetylglucosaminyltransferase [Source:VB Community Annotation]			GO:0004812,GO:0006486,GO:0008375,GO:0016020,GO:0016021,GO:0016740,GO:0016757,GO:0046872	aminoacyl-tRNA ligase activity,protein glycosylation,acetylglucosaminyltransferase activity,membrane,integral component of membrane,transferase activity,transferase activity, transferring glycosyl groups,metal ion binding
LOC5579204	634.324	-1.89922	0.19127	-9.92948	3.09873e-23	5.58191e-22	AAEL014044				GO:0004888,GO:0005887,GO:0016020,GO:0016021,GO:0030195	transmembrane signaling receptor activity,integral component of plasma membrane,membrane,integral component of membrane,negative regulation of blood coagulation
LOC5568611	5697.87	-1.84985	0.186491	-9.91925	3.43337e-23	6.17711e-22	AAEL006976				GO:0005634,GO:0016480	nucleus,negative regulation of transcription by RNA polymerase III
LOC5571032	351.328	1.46811	0.148072	9.91481	3.58956e-23	6.45015e-22	AAEL008761
LOC5566522	22362.4	1.03579	0.10448	9.91375	3.62779e-23	6.51084e-22	AAEL005451	60S ribosomal protein L38 [Source:UniProtKB/Swiss-Prot;Acc:Q1HRT4]	RpL38		GO:0003735,GO:0005840,GO:0006412	structural constituent of ribosome,ribosome,translation
LOC110680273	513.254	-1.82176	0.183791	-9.91214	3.68663e-23	6.60831e-22	AAEL027289
LOC5573851	6618.26	1.05807	0.106774	9.90947	3.78645e-23	6.7789e-22	AAEL010777	thioredoxin (TRX), putative [Source:VB Community Annotation]			GO:0005623,GO:0006662,GO:0015035,GO:0045454,GO:0055114	obsolete cell,glycerol ether metabolic process,protein disulfide oxidoreductase activity,cell redox homeostasis,oxidation-reduction process
LOC5576192	786.107	-2.2007	0.222182	-9.90495	3.96187e-23	7.08427e-22	AAEL012395	ATP-binding cassette transporter [Source:VB Community Annotation]			GO:0000166,GO:0005524,GO:0016020,GO:0016021,GO:0016887,GO:0042626,GO:0055085	nucleotide binding,ATP binding,membrane,integral component of membrane,ATPase activity,ATPase-coupled transmembrane transporter activity,transmembrane transport
LOC5571274	518.318	-2.24534	0.226873	-9.89688	4.29476e-23	7.67011e-22	AAEL001570				GO:0016020,GO:0016021	membrane,integral component of membrane
LOC5580276	2001.71	1.05616	0.106739	9.89476	4.38658e-23	7.82452e-22	AAEL003013	dual specificity mitogen-activated protein kinase kinase 4 MAPKK4 [Source:VB Community Annotation]			GO:0000166,GO:0004672,GO:0004674,GO:0005524,GO:0006468,GO:0016301,GO:0016310	nucleotide binding,protein kinase activity,protein serine/threonine kinase activity,ATP binding,protein phosphorylation,kinase activity,phosphorylation
LOC5576765	5224.35	-1.56138	0.157827	-9.893	4.46447e-23	7.95373e-22	AAEL012746	chaperonin [Source:VB Community Annotation]			GO:0000166,GO:0005524,GO:0005737,GO:0006457,GO:0051082	nucleotide binding,ATP binding,cytoplasm,protein folding,unfolded protein binding
LOC5567037	5563.68	-1.42156	0.143771	-9.88765	4.70952e-23	8.38007e-22	AAEL005790	malic enzyme [Source:VB Community Annotation]			GO:0004470,GO:0004471,GO:0016491,GO:0046872,GO:0051287,GO:0055114	malic enzyme activity,malate dehydrogenase (decarboxylating) (NAD+) activity,oxidoreductase activity,metal ion binding,NAD binding,oxidation-reduction process
LOC5569595	913.074	2.06313	0.208759	9.88283	4.94165e-23	8.78241e-22	AAEL001245	heterogeneous nuclear ribonucleoprotein [Source:VB Community Annotation]			GO:0003676,GO:0003723	nucleic acid binding,RNA binding
LOC5568763	3229.76	-1.85173	0.187371	-9.88269	4.94884e-23	8.78449e-22	AAEL007121	tartan [Source:VB Community Annotation]			GO:0005515,GO:0016020,GO:0016021	protein binding,membrane,integral component of membrane
LOC5566846	1260.94	1.50677	0.152515	9.87948	5.1098e-23	9.04089e-22	AAEL000804
LOC5564239	132.701	3.85077	0.389775	9.87947	5.1101e-23	9.04089e-22	AAEL018316				GO:0004930,GO:0007165,GO:0007186,GO:0016020,GO:0016021	G protein-coupled receptor activity,signal transduction,G protein-coupled receptor signaling pathway,membrane,integral component of membrane
LOC5568580	345.367	2.20793	0.223487	9.87944	5.11187e-23	9.04089e-22	AAEL019951				GO:0000166,GO:0004672,GO:0004674,GO:0004697,GO:0004698,GO:0005524,GO:0006468,GO:0008270,GO:0016301,GO:0016310,GO:0016740,GO:0035556	nucleotide binding,protein kinase activity,protein serine/threonine kinase activity,protein kinase C activity,calcium-dependent protein kinase C activity,ATP binding,protein phosphorylation,zinc ion binding,kinase activity,phosphorylation,transferase activity,intracellular signal transduction
LOC110681032	1410.91	1.24225	0.125758	9.87814	5.17861e-23	9.14784e-22	AAEL020429				GO:0015986,GO:0045261,GO:0046933	ATP synthesis coupled proton transport,proton-transporting ATP synthase complex, catalytic core F(1),proton-transporting ATP synthase activity, rotational mechanism
LOC5579196	393.965	-1.38373	0.140248	-9.86635	5.8247e-23	1.02767e-21	AAEL014037	PAF acetylhydrolase 45 kDa subunit, putative [Source:VB Community Annotation]			GO:0005515	protein binding
LOC5571481	344.745	1.92246	0.194966	9.86049	6.17487e-23	1.08813e-21	AAEL001624
LOC5578104	444.253	2.7532	0.279241	9.85959	6.23029e-23	1.09658e-21	AAEL003428				GO:0005515	protein binding
LOC5574813	742.049	-1.71662	0.174155	-9.85685	6.40253e-23	1.12553e-21	AAEL002474				GO:0003676,GO:0005515	nucleic acid binding,protein binding
LOC5567070	25901.7	0.843067	0.0855862	9.8505	6.8202e-23	1.19751e-21	AAEL005817	60S ribosomal protein L26 [Source:UniProtKB/TrEMBL;Acc:Q178R6]	RpL26		GO:0003723,GO:0003735,GO:0005840,GO:0006412,GO:0015934	RNA binding,structural constituent of ribosome,ribosome,translation,large ribosomal subunit
LOC5578564	347.74	1.45132	0.147345	9.84986	6.86406e-23	1.20377e-21	AAEL013749				GO:0004252,GO:0006508,GO:0016020,GO:0016021	serine-type endopeptidase activity,proteolysis,membrane,integral component of membrane
LOC5565116	1189.44	-1.7102	0.173647	-9.84868	6.94499e-23	1.2165e-21	AAEL019586				GO:0005515,GO:0016020	protein binding,membrane
LOC5566918	94.5142	-5.59924	0.568545	-9.84838	6.96601e-23	1.21872e-21	AAEL024932
LOC5567757	1764.97	-2.52074	0.256178	-9.83978	7.58732e-23	1.32583e-21	AAEL000126	molybdopterin cofactor synthesis protein a [Source:VB Community Annotation]			GO:0003824,GO:0006777,GO:0046872,GO:0051536,GO:0051539,GO:0061799	catalytic activity,Mo-molybdopterin cofactor biosynthetic process,metal ion binding,iron-sulfur cluster binding,4 iron, 4 sulfur cluster binding,cyclic pyranopterin monophosphate synthase activity
LOC110674113	335.413	-2.21212	0.224818	-9.83958	7.60252e-23	1.32689e-21	AAEL025310
LOC110679707	153.307	-3.1589	0.321054	-9.83917	7.63379e-23	1.33076e-21	AAEL019767				GO:0004252,GO:0006508	serine-type endopeptidase activity,proteolysis
LOC5575930	3132.73	-1.62668	0.165379	-9.83606	7.87371e-23	1.37095e-21	AAEL012178				GO:0005515,GO:0008270	protein binding,zinc ion binding
LOC110675596	7423.07	-2.54507	0.258978	-9.82734	8.58584e-23	1.49316e-21	AAEL020445
LOC5574458	1739.35	-2.46261	0.250606	-9.82663	8.64626e-23	1.50188e-21	AAEL011180
LOC110680731	152.581	-2.59437	0.26413	-9.82231	9.02477e-23	1.56576e-21	AAEL023956
LOC5570431	165.218	-2.34187	0.238515	-9.81856	9.3673e-23	1.62326e-21	AAEL008323				GO:0005773,GO:0005774,GO:0005929,GO:0016020,GO:0016021,GO:0042995	vacuole,vacuolar membrane,cilium,membrane,integral component of membrane,cell projection
LOC5568348	1012.12	-2.57747	0.26259	-9.81557	9.64893e-23	1.67008e-21	AAEL001062
LOC5575939	116.324	-2.57858	0.262784	-9.81254	9.94351e-23	1.71903e-21	AAEL012184	glutaminyl-peptide cyclotransferase [Source:VB Community Annotation]			GO:0016603,GO:0016740,GO:0016746	glutaminyl-peptide cyclotransferase activity,transferase activity,transferase activity, transferring acyl groups
LOC110675977	707.435	2.67292	0.2725	9.80889	1.03098e-22	1.78024e-21	AAEL023581				GO:0006486,GO:0016020	protein glycosylation,membrane
LOC5570155	265.586	2.36317	0.241068	9.80293	1.09369e-22	1.8863e-21	AAEL008126	GPCR Latrophilin Family [Source:VB Community Annotation]	GPRCIR		GO:0005886,GO:0016020,GO:0016021,GO:0030246	plasma membrane,membrane,integral component of membrane,carbohydrate binding
LOC5576035	396.525	1.82266	0.186077	9.79517	1.181e-22	2.03447e-21	AAEL012263	Zinc finger protein [Source:UniProtKB/TrEMBL;Acc:A0A1S4FVL8]			GO:0003676,GO:0046872	nucleic acid binding,metal ion binding
LOC5565160	3412.47	-1.61258	0.164635	-9.79486	1.18456e-22	2.0382e-21	AAEL023895				GO:0003676,GO:0003723,GO:0005515	nucleic acid binding,RNA binding,protein binding
LOC23687462	498.231	1.63357	0.166791	9.7941	1.19351e-22	2.05117e-21	AAEL017042
LOC110679365	6390.67	-1.89621	0.193612	-9.79385	1.19649e-22	2.05388e-21	AAEL020525				GO:0003723,GO:0003729,GO:0003743,GO:0005515	RNA binding,mRNA binding,translation initiation factor activity,protein binding
LOC5574366	1174.89	-2.27169	0.232087	-9.78813	1.2662e-22	2.17099e-21	AAEL011083				GO:0008270	zinc ion binding
LOC5576477	12163.7	-2.30606	0.235715	-9.78323	1.32901e-22	2.27601e-21	AAEL002887	Armadillo segment polarity protein [Source:UniProtKB/Swiss-Prot;Acc:Q17GS9]	arm		GO:0005515,GO:0005737,GO:0005886,GO:0005912,GO:0007155,GO:0007275,GO:0007367,GO:0008134,GO:0014017,GO:0016020,GO:0016055,GO:0030054,GO:0045296,GO:0060070	protein binding,cytoplasm,plasma membrane,adherens junction,cell adhesion,multicellular organism development,segment polarity determination,transcription factor binding,neuroblast fate commitment,membrane,Wnt signaling pathway,cell junction,cadherin binding,canonical Wnt signaling pathway
LOC110675371	1338.27	2.39129	0.244437	9.78286	1.3339e-22	2.2817e-21	AAEL027353
LOC5578744	199.324	2.52685	0.258497	9.77516	1.43924e-22	2.45902e-21	AAEL020575
LOC5564678	664.66	-1.94696	0.199214	-9.77324	1.46687e-22	2.50329e-21	AAEL004389	mannosidase alpha class 2a [Source:VB Community Annotation]			GO:0003824,GO:0004559,GO:0005975,GO:0006013,GO:0008152,GO:0016787,GO:0016798,GO:0030246,GO:0046872	catalytic activity,alpha-mannosidase activity,carbohydrate metabolic process,mannose metabolic process,metabolic process,hydrolase activity,hydrolase activity, acting on glycosyl bonds,carbohydrate binding,metal ion binding
LOC23687815	1227.1	1.66211	0.170145	9.76879	1.53264e-22	2.61248e-21	AAEL017395				GO:0016020,GO:0016021,GO:0022857	membrane,integral component of membrane,transmembrane transporter activity
LOC5577711	2806.45	-2.5299	0.259003	-9.76783	1.54733e-22	2.63444e-21	AAEL013346	lethal(2)essential for life protein, l2efl [Source:VB Community Annotation]			GO:0046872	metal ion binding
LOC5578786	3494.5	1.97388	0.202166	9.76366	1.61235e-22	2.74193e-21	AAEL026395	Histone H3 [Source:UniProtKB/TrEMBL;Acc:Q16N56]
LOC5565264	184.216	2.24182	0.229679	9.76065	1.66087e-22	2.82116e-21	AAEL004700	cdkl1/4 [Source:VB Community Annotation]			GO:0000166,GO:0004672,GO:0004674,GO:0005524,GO:0006468	nucleotide binding,protein kinase activity,protein serine/threonine kinase activity,ATP binding,protein phosphorylation
LOC5571940	2058.62	-1.09316	0.112034	-9.75742	1.71467e-22	2.90915e-21	AAEL009423	Class B Scavenger Receptor (CD36 domain). [Source:VB Community Annotation]	SCRBQ2		GO:0005886,GO:0016020,GO:0016021	plasma membrane,membrane,integral component of membrane
LOC5565228	356.938	2.42501	0.248634	9.75335	1.78486e-22	3.02473e-21	AAEL018326	Sodium/nucleoside cotransporter [Source:UniProtKB/TrEMBL;Acc:A0A1S4G7K8]			GO:0005337,GO:0016020,GO:0016021,GO:1901642	nucleoside transmembrane transporter activity,membrane,integral component of membrane,nucleoside transmembrane transport
LOC5564851	8066.12	2.39383	0.245458	9.7525	1.79974e-22	3.0464e-21	AAEL000604
LOC5574463	1229.94	-2.28903	0.234757	-9.75064	1.83305e-22	3.09919e-21	AAEL011178	posterior sex combs protein [Source:VB Community Annotation]			GO:0005634,GO:0046872	nucleus,metal ion binding
LOC5567879	90.942	-4.20949	0.432297	-9.73748	2.08662e-22	3.52382e-21	AAEL006348	deoxyribonuclease I, putative [Source:VB Community Annotation]			GO:0003676,GO:0016787,GO:0046872	nucleic acid binding,hydrolase activity,metal ion binding
LOC5568091	1818.52	-1.81408	0.186304	-9.73719	2.09251e-22	3.52969e-21	AAEL006522	turtle protein, isoform [Source:VB Community Annotation]			GO:0005515,GO:0016020,GO:0016021	protein binding,membrane,integral component of membrane
LOC5574802	1887.52	-0.940109	0.0965547	-9.73654	2.10594e-22	3.54824e-21	AAEL024570				GO:0000166,GO:0004672,GO:0004713,GO:0004715,GO:0005524,GO:0006468,GO:0016301,GO:0016310,GO:0016740,GO:0018108	nucleotide binding,protein kinase activity,protein tyrosine kinase activity,non-membrane spanning protein tyrosine kinase activity,ATP binding,protein phosphorylation,kinase activity,phosphorylation,transferase activity,peptidyl-tyrosine phosphorylation
LOC5576179	1176.34	2.59805	0.266842	9.73627	2.11156e-22	3.55361e-21	AAEL012371				GO:0003677,GO:0005515	DNA binding,protein binding
LOC5570881	1810.39	-1.36623	0.140362	-9.73363	2.16728e-22	3.64317e-21	AAEL008662	mixed-lineage leukemia protein [Source:VB Community Annotation]			GO:0005634,GO:0046872	nucleus,metal ion binding
LOC5578878	573.407	-3.35275	0.344465	-9.73321	2.17605e-22	3.65371e-21	AAEL013882	tkr [Source:VB Community Annotation]			GO:0003677,GO:0005515,GO:0005634	DNA binding,protein binding,nucleus
LOC5574706	145.013	2.87561	0.295498	9.73141	2.21491e-22	3.71469e-21	AAEL011347
LOC110680300	242.237	3.37109	0.346422	9.73118	2.22006e-22	3.71905e-21	AAEL026650				GO:0005515	protein binding
LOC110678434	325.461	-2.19315	0.225415	-9.72939	2.2595e-22	3.78078e-21	AAEL020658
LOC5573380	448.08	2.2635	0.232711	9.72664	2.32138e-22	3.87986e-21	AAEL010469
LOC5569249	1676.44	-1.13532	0.11676	-9.72353	2.39341e-22	3.99568e-21	AAEL020508
LOC5570361	135.988	-3.01116	0.309776	-9.72043	2.46734e-22	4.1144e-21	AAEL026740
LOC110674749	3374.14	1.90613	0.196115	9.71945	2.49121e-22	4.14946e-21	AAEL027190
LOC5579854	863.551	-1.37321	0.14131	-9.71775	2.53329e-22	4.21474e-21	AAEL005856	signal recognition particle receptor alpha subunit (sr-alpha) [Source:VB Community Annotation]			GO:0000166,GO:0003924,GO:0005047,GO:0005525,GO:0005785,GO:0006614,GO:0006886	nucleotide binding,GTPase activity,signal recognition particle binding,GTP binding,signal recognition particle receptor complex,SRP-dependent cotranslational protein targeting to membrane,intracellular protein transport
LOC5567129	455.216	1.64353	0.169139	9.71706	2.55032e-22	4.23824e-21	AAEL005884
LOC5572454	1340.1	-1.72427	0.177606	-9.70845	2.77523e-22	4.60676e-21	AAEL001815				GO:0005515	protein binding
LOC5576142	442.661	1.42988	0.147311	9.70656	2.8273e-22	4.68785e-21	AAEL012337	goliath E3 ubiquitin ligase [Source:VB Community Annotation]			GO:0016020,GO:0016021,GO:0046872	membrane,integral component of membrane,metal ion binding
LOC5568413	699.427	2.76865	0.285336	9.7031	2.92474e-22	4.84392e-21	AAEL006827	cytochrome P450 [Source:VB Community Annotation]	CYP12F8		GO:0004497,GO:0005506,GO:0016491,GO:0016705,GO:0020037,GO:0046872,GO:0055114	monooxygenase activity,iron ion binding,oxidoreductase activity,oxidoreductase activity, acting on paired donors, with incorporation or reduction of molecular oxygen,heme binding,metal ion binding,oxidation-reduction process
LOC110677056	343.396	2.37215	0.244596	9.69824	3.06755e-22	5.07468e-21	AAEL024274
LOC5577715	644.803	-1.53595	0.158551	-9.6874	3.41113e-22	5.63667e-21	AAEL013351	lethal(2)essential for life protein, l2efl [Source:VB Community Annotation]			GO:0046872	metal ion binding
LOC5564938	757.271	1.49066	0.153889	9.6866	3.43795e-22	5.67456e-21	AAEL004485	sodium/hydrogen exchanger 5, 6, 8 (nhe5, nhe6, nhe8) [Source:VB Community Annotation]	NHE8		GO:0006811,GO:0006812,GO:0006814,GO:0006885,GO:0015297,GO:0015299,GO:0015385,GO:0016020,GO:0016021,GO:0035725,GO:0055085,GO:1902600	ion transport,cation transport,sodium ion transport,regulation of pH,antiporter activity,solute:proton antiporter activity,sodium:proton antiporter activity,membrane,integral component of membrane,sodium ion transmembrane transport,transmembrane transport,proton transmembrane transport
LOC5565962	12864.3	0.903904	0.0933164	9.68645	3.44302e-22	5.6765e-21	AAEL005220	60S ribosomal protein L30 [Source:UniProtKB/TrEMBL;Acc:Q1HR35]	RpL30		GO:0003723,GO:0003735,GO:0005840,GO:0006412,GO:0022625	RNA binding,structural constituent of ribosome,ribosome,translation,cytosolic large ribosomal subunit
LOC5568101	1613.26	1.51054	0.155963	9.68528	3.48264e-22	5.73535e-21	AAEL006556
LOC5570921	3436.41	1.77063	0.182846	9.68373	3.5358e-22	5.81633e-21	AAEL001495				GO:0016020,GO:0016021	membrane,integral component of membrane
LOC5580160	4780.98	-2.20253	0.227556	-9.67906	3.70109e-22	6.08137e-21	AAEL011397				GO:0016020,GO:0016021	membrane,integral component of membrane
LOC5574477	1084.83	2.42022	0.250476	9.66246	4.35264e-22	7.14391e-21	AAEL002404	receptor protein tyrosine kinase [Source:VB Community Annotation]			GO:0004672,GO:0004713,GO:0005515,GO:0005524,GO:0006468,GO:0016020,GO:0016021,GO:0018108	protein kinase activity,protein tyrosine kinase activity,protein binding,ATP binding,protein phosphorylation,membrane,integral component of membrane,peptidyl-tyrosine phosphorylation
LOC5565211	164.915	-2.63402	0.272907	-9.65169	4.83501e-22	7.92671e-21	AAEL004673				GO:0005515	protein binding
LOC23687649	323.454	-3.15194	0.32659	-9.65107	4.86476e-22	7.96353e-21	AAEL017229				GO:0003676,GO:0006355	nucleic acid binding,regulation of transcription, DNA-templated
LOC23687758	761.093	1.51009	0.15647	9.65099	4.86839e-22	7.96353e-21	AAEL017338				GO:0000165,GO:0000166,GO:0000185,GO:0004672,GO:0004674,GO:0005524,GO:0006468,GO:0008349,GO:0016301,GO:0016310,GO:0016740	MAPK cascade,nucleotide binding,activation of MAPKKK activity,protein kinase activity,protein serine/threonine kinase activity,ATP binding,protein phosphorylation,MAP kinase kinase kinase kinase activity,kinase activity,phosphorylation,transferase activity
LOC5565298	6947.59	-1.34503	0.1394	-9.64873	4.97689e-22	8.13189e-21	AAEL014816
LOC5563638	305.963	-3.46472	0.359335	-9.64204	5.31217e-22	8.67002e-21	AAEL000021
LOC5578788	3379.75	2.02524	0.210096	9.63959	5.44073e-22	8.86992e-21	AAEL015682	Histone H2B [Source:UniProtKB/TrEMBL;Acc:Q17ER2]			GO:0000786,GO:0003677,GO:0005634,GO:0005694,GO:0046982	nucleosome,DNA binding,nucleus,chromosome,protein heterodimerization activity
LOC23687749	2104.13	1.93618	0.200979	9.63374	5.75962e-22	9.37932e-21	AAEL017329				GO:0005515,GO:0008270,GO:0046872	protein binding,zinc ion binding,metal ion binding
LOC5570159	1263.59	1.58732	0.164773	9.6334	5.77849e-22	9.39954e-21	AAEL008131	cytidylate kinase [Source:VB Community Annotation]			GO:0000166,GO:0004127,GO:0005524,GO:0005634,GO:0005737,GO:0006139,GO:0006207,GO:0006221,GO:0009041,GO:0016301,GO:0016310,GO:0016740,GO:0019205,GO:0046940	nucleotide binding,cytidylate kinase activity,ATP binding,nucleus,cytoplasm,nucleobase-containing compound metabolic process,'de novo' pyrimidine nucleobase biosynthetic process,pyrimidine nucleotide biosynthetic process,uridylate kinase activity,kinase activity,phosphorylation,transferase activity,nucleobase-containing compound kinase activity,nucleoside monophosphate phosphorylation
LOC5574875	4010.52	-1.3645	0.141656	-9.6325	5.82947e-22	9.47191e-21	AAEL011469
LOC5572656	127.497	-3.11217	0.323099	-9.63224	5.84433e-22	9.4855e-21	AAEL001878	lipase [Source:VB Community Annotation]			GO:0004806,GO:0005576,GO:0006629,GO:0052689	triglyceride lipase activity,extracellular region,lipid metabolic process,carboxylic ester hydrolase activity
LOC5567076	171.543	-1.95603	0.203159	-9.62809	6.08483e-22	9.86487e-21	AAEL005819	l-allo-threonine aldolase [Source:VB Community Annotation]			GO:0003824,GO:0006520,GO:0016829	catalytic activity,cellular amino acid metabolic process,lyase activity
LOC5568679	473.173	2.59385	0.269606	9.62089	6.52632e-22	1.05689e-20	AAEL007034
LOC5579061	567.221	-2.05962	0.214136	-9.61828	6.69391e-22	1.08283e-20	AAEL013997	guanine nucleotide-binding protein beta 3 (g protein beta3) [Source:VB Community Annotation]			GO:0005515,GO:0007165	protein binding,signal transduction
LOC5580037	435.213	2.8562	0.297284	9.60764	7.42308e-22	1.19945e-20	AAEL010240				GO:0000786,GO:0003677,GO:0005634,GO:0006334,GO:0042025	nucleosome,DNA binding,nucleus,nucleosome assembly,host cell nucleus
LOC5566410	183.837	6.07771	0.632889	9.60312	7.75641e-22	1.25192e-20	AAEL005373	pteropsin [Source:VB Community Annotation]	GPROP12		GO:0004930,GO:0007165,GO:0007186,GO:0016020,GO:0016021	G protein-coupled receptor activity,signal transduction,G protein-coupled receptor signaling pathway,membrane,integral component of membrane
LOC5572925	604.554	1.33734	0.139269	9.60258	7.79655e-22	1.25701e-20	AAEL010143	isocitrate dehydrogenase [Source:VB Community Annotation]			GO:0000287,GO:0004449,GO:0005739,GO:0006099,GO:0016616,GO:0051287,GO:0055114	magnesium ion binding,isocitrate dehydrogenase (NAD+) activity,mitochondrion,tricarboxylic acid cycle,oxidoreductase activity, acting on the CH-OH group of donors, NAD or NADP as acceptor,NAD binding,oxidation-reduction process
LOC5574244	759.258	-1.24187	0.129358	-9.60025	7.97509e-22	1.28438e-20	AAEL021342	V-type proton ATPase subunit [Source:UniProtKB/TrEMBL;Acc:Q1HQS1]			GO:0006811,GO:0015078,GO:0015991,GO:0033179,GO:1902600	ion transport,proton transmembrane transporter activity,GO_0015991,proton-transporting V-type ATPase, V0 domain,proton transmembrane transport
LOC5570686	35802.7	1.45397	0.151495	9.59754	8.18766e-22	1.31716e-20	AAEL008500	DEAD box ATP-dependent RNA helicase [Source:VB Community Annotation]			GO:0000166,GO:0003676,GO:0003724,GO:0004386,GO:0005524,GO:0016787	nucleotide binding,nucleic acid binding,RNA helicase activity,helicase activity,ATP binding,hydrolase activity
LOC5565917	470.009	1.83579	0.191422	9.5903	8.78303e-22	1.41138e-20	AAEL000698				GO:0005515,GO:0008270	protein binding,zinc ion binding
LOC5568549	1120.28	-1.38266	0.144175	-9.59012	8.79798e-22	1.41215e-20	AAEL006937	structural maintenance of chromosomes 3 smc3 [Source:VB Community Annotation]			GO:0005515,GO:0005524,GO:0005634,GO:0005694,GO:0051276,GO:0051301	protein binding,ATP binding,nucleus,chromosome,chromosome organization,cell division
LOC110679478	136.935	-2.89057	0.301415	-9.59002	8.80716e-22	1.41215e-20	AAEL027452
LOC5580096	1881.83	0.985136	0.102756	9.58716	9.05427e-22	1.45017e-20	AAEL002145	gonadotropin inducible transcription factor [Source:VB Community Annotation]			GO:0003676	nucleic acid binding
LOC5564670	354.343	1.63947	0.171013	9.58681	9.08481e-22	1.45347e-20	AAEL014554				GO:0003676,GO:0005634,GO:0008270,GO:0046872	nucleic acid binding,nucleus,zinc ion binding,metal ion binding
LOC5578321	613.105	1.34112	0.139902	9.58611	9.14705e-22	1.46182e-20	AAEL013639				GO:0016020,GO:0016021	membrane,integral component of membrane
LOC5573467	2450.79	1.27547	0.133124	9.5811	9.60133e-22	1.53275e-20	AAEL010506	GTP-binding protein alpha subunit, gna [Source:VB Community Annotation]			GO:0001664,GO:0003924,GO:0005525,GO:0007165,GO:0007186,GO:0019001,GO:0031683	G protein-coupled receptor binding,GTPase activity,GTP binding,signal transduction,G protein-coupled receptor signaling pathway,guanyl nucleotide binding,G-protein beta/gamma-subunit complex binding
LOC5573325	579.078	2.01838	0.210793	9.57516	1.01698e-21	1.62173e-20	AAEL010412
LOC5573815	1830.65	-3.10352	0.32419	-9.57315	1.03702e-21	1.65187e-20	AAEL000599	wingless protein, putative [Source:VB Community Annotation]			GO:0005102,GO:0005576,GO:0007275,GO:0016055	signaling receptor binding,extracellular region,multicellular organism development,Wnt signaling pathway
LOC5566025	483.473	1.40364	0.146698	9.56823	1.08753e-21	1.73044e-20	AAEL020071				GO:0046872	metal ion binding
LOC23687740	84.9528	-4.54589	0.475148	-9.56731	1.09719e-21	1.7439e-20	AAEL017320				GO:0016491,GO:0047886,GO:0055114	oxidoreductase activity,farnesol dehydrogenase activity,oxidation-reduction process
LOC5575456	381.19	2.66106	0.2785	9.55497	1.23614e-21	1.96263e-20	AAEL011836				GO:0005515	protein binding
LOC5565179	334.221	2.59801	0.271912	9.55458	1.24091e-21	1.96806e-20	AAEL004624
LOC5574984	533.422	2.40779	0.25207	9.55207	1.27126e-21	2.014e-20	AAEL021326
LOC5579419	379.511	1.42113	0.148793	9.551	1.28446e-21	2.03271e-20	AAEL026018
LOC110679126	186.459	2.39028	0.250344	9.54799	1.32242e-21	2.09051e-20	AAEL020300				GO:0005515	protein binding
LOC110678647	1925.91	-1.15329	0.12087	-9.54159	1.40663e-21	2.22123e-20	AAEL026946				GO:0005515	protein binding
LOC5573193	164.548	1.96541	0.206136	9.53452	1.50585e-21	2.37534e-20	AAEL002019				GO:0005515,GO:0005739,GO:0034551	protein binding,mitochondrion,mitochondrial respiratory chain complex III assembly
LOC110674015	157.949	-2.48709	0.260855	-9.53438	1.50782e-21	2.37588e-20	AAEL028201				GO:0007093,GO:1990423	mitotic cell cycle checkpoint,RZZ complex
LOC5566857	209.815	-2.44171	0.256176	-9.53139	1.55192e-21	2.44052e-20	AAEL000834	dimethylaniline monooxygenase [Source:VB Community Annotation]			GO:0004497,GO:0004499,GO:0016491,GO:0050660,GO:0050661,GO:0055114	monooxygenase activity,N,N-dimethylaniline monooxygenase activity,oxidoreductase activity,flavin adenine dinucleotide binding,NADP binding,oxidation-reduction process
LOC5568166	741.336	-2.84184	0.298156	-9.53137	1.55219e-21	2.44052e-20	AAEL006609	zinc finger protein [Source:VB Community Annotation]			GO:0003676	nucleic acid binding
LOC5565232	722.132	1.05557	0.110808	9.52611	1.63284e-21	2.56456e-20	AAEL004663	pseudouridylate synthase [Source:VB Community Annotation]			GO:0001522,GO:0003723,GO:0008033,GO:0009451,GO:0009982,GO:0016853,GO:0106029	pseudouridine synthesis,RNA binding,tRNA processing,RNA modification,pseudouridine synthase activity,isomerase activity,tRNA pseudouridine synthase activity
LOC5575334	878.309	1.71984	0.180567	9.52467	1.65574e-21	2.59774e-20	AAEL002593	serine protease [Source:VB Community Annotation]			GO:0004252,GO:0006508	serine-type endopeptidase activity,proteolysis
LOC5567723	518.437	1.43078	0.150254	9.52243	1.69168e-21	2.65127e-20	AAEL006294				GO:0005515,GO:0006491,GO:0016020,GO:0016021	protein binding,N-glycan processing,membrane,integral component of membrane
LOC5573370	1280.8	1.85924	0.195317	9.51909	1.74697e-21	2.73498e-20	AAEL010470	calcineurin b subunit [Source:VB Community Annotation]			GO:0005509	calcium ion binding
LOC5566769	569.638	-1.56268	0.164251	-9.51402	1.83433e-21	2.86867e-20	AAEL019735				GO:0005515,GO:0016740	protein binding,transferase activity
LOC5570220	715.56	-2.2338	0.234927	-9.50848	1.93477e-21	3.02252e-20	AAEL008151
LOC5571097	9318.7	1.95415	0.205536	9.50759	1.95131e-21	3.04508e-20	AAEL001511
LOC110677709	403.36	-2.95447	0.310781	-9.50661	1.9698e-21	3.07066e-20	AAEL027706				GO:0005085,GO:0006897,GO:0007165,GO:0016020,GO:0043087	guanyl-nucleotide exchange factor activity,endocytosis,signal transduction,membrane,regulation of GTPase activity
LOC23687519	293.334	1.97981	0.208397	9.50021	2.09464e-21	3.26179e-20	AAEL024602
LOC110676024	97.9475	-2.81853	0.296926	-9.49237	2.25835e-21	3.51296e-20	AAEL024713
LOC5573601	195.687	2.64376	0.278823	9.48186	2.49797e-21	3.88157e-20	AAEL002116	supercoiling factor, putative [Source:VB Community Annotation]			GO:0005509,GO:0016020,GO:0016021	calcium ion binding,membrane,integral component of membrane
LOC5578108	21145.9	2.30522	0.24319	9.4791	2.56479e-21	3.98115e-20	AAEL003404
LOC110678280	429.486	-1.29047	0.136178	-9.47634	2.63368e-21	4.08375e-20	AAEL027737				GO:0003676	nucleic acid binding
LOC5576986	372.907	1.30368	0.137576	9.47606	2.64058e-21	4.0901e-20	AAEL003055				GO:0005739,GO:0016020,GO:0016021,GO:0043022	mitochondrion,membrane,integral component of membrane,ribosome binding
LOC5572486	850.116	-1.75059	0.184748	-9.47556	2.65335e-21	4.10552e-20	AAEL009817				GO:0003824,GO:0016791	catalytic activity,phosphatase activity
LOC110681048	206.397	2.4562	0.259354	9.47045	2.78643e-21	4.30687e-20	AAEL021847				GO:0004497,GO:0005506,GO:0009072,GO:0016714,GO:0055114	monooxygenase activity,iron ion binding,aromatic amino acid family metabolic process,oxidoreductase activity, acting on paired donors, with incorporation or reduction of molecular oxygen, reduced pteridine as one donor, and incorporation of one atom of oxygen,oxidation-reduction process
LOC23687479	627.085	1.65092	0.174409	9.46575	2.91471e-21	4.50037e-20	AAEL017059				GO:0003824	catalytic activity
LOC5565734	3227.29	-2.24151	0.236823	-9.46492	2.93795e-21	4.53147e-20	AAEL018040				GO:0000166,GO:0005524,GO:0016020,GO:0016021,GO:0016887,GO:0042626,GO:0055085	nucleotide binding,ATP binding,membrane,integral component of membrane,ATPase activity,ATPase-coupled transmembrane transporter activity,transmembrane transport
LOC5567273	823.05	2.74798	0.290396	9.46286	2.99627e-21	4.61653e-20	AAEL005915	monocarboxylate transporter [Source:VB Community Annotation]			GO:0016020,GO:0016021,GO:0022857,GO:0055085	membrane,integral component of membrane,transmembrane transporter activity,transmembrane transport
LOC5567902	972.32	-1.42616	0.150731	-9.46162	3.03215e-21	4.66689e-20	AAEL006337				GO:0006508,GO:0008233,GO:0008234	proteolysis,peptidase activity,cysteine-type peptidase activity
LOC5567364	1453.34	2.41423	0.255187	9.46062	3.06122e-21	4.7063e-20	AAEL006035				GO:0003746,GO:0005634,GO:0006368,GO:0006414,GO:0008023	translation elongation factor activity,nucleus,transcription elongation from RNA polymerase II promoter,translational elongation,transcription elongation factor complex
LOC5564176	1081.63	1.68813	0.178439	9.46052	3.06421e-21	4.7063e-20	AAEL004125	signal transduction protein lnk-realted [Source:VB Community Annotation]			GO:0007165,GO:0035591	signal transduction,signaling adaptor activity
LOC110676223	626.032	-1.1798	0.12475	-9.45732	3.1593e-21	4.84726e-20	AAEL027472				GO:0000166,GO:0003676,GO:0003724,GO:0004386,GO:0005524,GO:0016787	nucleotide binding,nucleic acid binding,RNA helicase activity,helicase activity,ATP binding,hydrolase activity
LOC5579661	265.118	1.87352	0.198109	9.45698	3.16964e-21	4.858e-20	AAEL003961	short-chain dehydrogenase [Source:VB Community Annotation]			GO:0016020,GO:0016021,GO:0016491,GO:0055114	membrane,integral component of membrane,oxidoreductase activity,oxidation-reduction process
LOC5574137	5200.62	-2.215	0.234243	-9.45597	3.20055e-21	4.90024e-20	AAEL010944
LOC5571213	223.387	2.5358	0.268244	9.45333	3.28212e-21	5.01986e-20	AAEL008909
LOC5575514	3337.9	2.39287	0.253226	9.44954	3.40327e-21	5.1997e-20	AAEL011892	receptor for activated C kinase, putative [Source:VB Community Annotation]			GO:0005515	protein binding
LOC5578225	920.867	2.53007	0.267792	9.44789	3.45735e-21	5.27679e-20	AAEL013565				GO:0005262,GO:0005739,GO:0005743,GO:0006811,GO:0006816,GO:0015292,GO:0016020,GO:0016021,GO:0051560,GO:0070588	calcium channel activity,mitochondrion,mitochondrial inner membrane,ion transport,calcium ion transport,uniporter activity,membrane,integral component of membrane,mitochondrial calcium ion homeostasis,calcium ion transmembrane transport
LOC5565539	277.767	2.46991	0.261515	9.44464	3.56614e-21	5.43715e-20	AAEL027153
LOC5569114	2481.41	-3.34565	0.354288	-9.44331	3.61189e-21	5.50116e-20	AAEL007377	ammonium transporter [Source:VB Community Annotation]			GO:0008519,GO:0015696,GO:0016020,GO:0016021,GO:0072488	ammonium transmembrane transporter activity,ammonium transport,membrane,integral component of membrane,ammonium transmembrane transport
LOC5575093	5477.6	-1.69286	0.179274	-9.44286	3.62757e-21	5.51928e-20	AAEL011648	cyclin d [Source:VB Community Annotation]			GO:0005634,GO:0042025	nucleus,host cell nucleus
LOC5570997	2580.7	-1.42301	0.150746	-9.43976	3.73632e-21	5.67881e-20	AAEL008730	anillin/rhotekin (rtkn) [Source:VB Community Annotation]
LOC5578389	656.822	1.32702	0.140637	9.43583	3.87894e-21	5.88945e-20	AAEL013679	coilin-interacting nulcear ATPase protein, putative [Source:VB Community Annotation]			GO:0000166,GO:0004017,GO:0005524,GO:0005634,GO:0016301,GO:0016310,GO:0016740,GO:0016887,GO:0046940	nucleotide binding,adenylate kinase activity,ATP binding,nucleus,kinase activity,phosphorylation,transferase activity,ATPase activity,nucleoside monophosphate phosphorylation
LOC5576563	83.9891	-2.75283	0.291917	-9.43019	4.09356e-21	6.20884e-20	AAEL023505				GO:0004252,GO:0006508	serine-type endopeptidase activity,proteolysis
LOC5578261	1966.98	1.83774	0.194999	9.42433	4.3286e-21	6.55853e-20	AAEL003494	goodpasture antigen-binding protein [Source:VB Community Annotation]			GO:0008289	lipid binding
LOC5577996	18165.9	1.16369	0.123486	9.42358	4.3595e-21	6.5985e-20	AAEL003396	60S ribosomal protein L32 [Source:UniProtKB/TrEMBL;Acc:Q1HR34]	RpL32	rp49	GO:0003735,GO:0005840,GO:0006412	structural constituent of ribosome,ribosome,translation
LOC5577340	326.092	1.6952	0.180156	9.40959	4.9807e-21	7.53091e-20	AAEL000411				GO:0003677,GO:0003697,GO:0006508,GO:0006974,GO:0008233,GO:0016787,GO:0018142	DNA binding,single-stranded DNA binding,proteolysis,cellular response to DNA damage stimulus,peptidase activity,hydrolase activity,protein-DNA covalent cross-linking
LOC5573038	1623.4	-1.93012	0.205258	-9.40341	5.28217e-21	7.97849e-20	AAEL025993				GO:0000166,GO:0003824,GO:0005737,GO:0016491,GO:0016627,GO:0017113,GO:0019483,GO:0046872,GO:0051536,GO:0051539,GO:0055114	nucleotide binding,catalytic activity,cytoplasm,oxidoreductase activity,oxidoreductase activity, acting on the CH-CH group of donors,dihydropyrimidine dehydrogenase (NADP+) activity,beta-alanine biosynthetic process,metal ion binding,iron-sulfur cluster binding,4 iron, 4 sulfur cluster binding,oxidation-reduction process
LOC5578848	312.9	2.35886	0.250864	9.40295	5.30519e-21	8.00497e-20	AAEL014362
LOC5578360	381.917	-3.68957	0.392413	-9.40224	5.34122e-21	8.051e-20	AAEL024675				GO:0015267,GO:0016020,GO:0016021,GO:0055085	channel activity,membrane,integral component of membrane,transmembrane transport
LOC5568619	523.606	1.55882	0.165802	9.40169	5.36934e-21	8.08504e-20	AAEL006983				GO:0003676	nucleic acid binding
LOC5564571	143.105	-2.70019	0.287247	-9.40024	5.4437e-21	8.18856e-20	AAEL014518
LOC5576725	550.614	-1.80088	0.191794	-9.38966	6.0194e-21	9.03748e-20	AAEL002964	brain chitinase and chia [Source:VB Community Annotation]			GO:0005975,GO:0008061,GO:0030246	carbohydrate metabolic process,chitin binding,carbohydrate binding
LOC5580241	928.417	-1.38138	0.147117	-9.38964	6.02044e-21	9.03748e-20	AAEL012325				GO:0005737,GO:0043248,GO:0060090	cytoplasm,proteasome assembly,molecular adaptor activity
LOC5566906	354.48	2.023	0.21549	9.38791	6.12048e-21	9.1782e-20	AAEL025454				GO:0004252,GO:0006508,GO:0016020,GO:0016021	serine-type endopeptidase activity,proteolysis,membrane,integral component of membrane
LOC5570515	259.049	2.89663	0.308601	9.38632	6.21303e-21	9.30743e-20	AAEL001423	acid phosphatase-1 [Source:VB Community Annotation]			GO:0003993,GO:0016020,GO:0016021,GO:0016311	acid phosphatase activity,membrane,integral component of membrane,dephosphorylation
LOC5575816	74.2722	2.99875	0.319681	9.38045	6.56931e-21	9.83106e-20	AAEL027091				GO:0016021,GO:0035461,GO:0051180,GO:0090482	integral component of membrane,vitamin transmembrane transport,vitamin transport,vitamin transmembrane transporter activity
LOC5567979	754.731	2.02292	0.215665	9.37991	6.60268e-21	9.87087e-20	AAEL006412	sodium- and chloride-dependent neurotransmitter transporter [Source:VB Community Annotation]			GO:0005034,GO:0005328,GO:0006836,GO:0015293,GO:0016020,GO:0016021,GO:0019226,GO:0042065,GO:0055085	osmosensor activity,,neurotransmitter transport,symporter activity,membrane,integral component of membrane,transmission of nerve impulse,glial cell growth,transmembrane transport
LOC5580327	214.572	1.99982	0.213224	9.37898	6.66147e-21	9.94857e-20	AAEL013070				GO:0016020,GO:0016021	membrane,integral component of membrane
LOC5571711	5330.27	-2.19031	0.233595	-9.3765	6.81989e-21	1.01748e-19	AAEL009240	neurotactin [Source:VB Community Annotation]			GO:0016020,GO:0016021	membrane,integral component of membrane
LOC5567268	205.408	2.19574	0.234221	9.37467	6.93949e-21	1.03426e-19	AAEL005936				GO:0004862,GO:0006469,GO:2000480	cAMP-dependent protein kinase inhibitor activity,negative regulation of protein kinase activity,negative regulation of cAMP-dependent protein kinase activity
LOC5564858	7296.4	-0.795694	0.084889	-9.37335	7.0264e-21	1.04614e-19	AAEL004467				GO:0005634,GO:0005719,GO:0045892	nucleus,nuclear euchromatin,negative regulation of transcription, DNA-templated
LOC5566992	131.817	-2.38746	0.25476	-9.37143	7.15563e-21	1.0643e-19	AAEL005738	yellow protein precursor [Source:VB Community Annotation]
LOC5569668	293.658	-2.11599	0.225842	-9.36933	7.2996e-21	1.08461e-19	AAEL007811	short-chain dehydrogenase [Source:VB Community Annotation]			GO:0005515,GO:0006915,GO:0016055,GO:0055114	protein binding,apoptotic process,Wnt signaling pathway,oxidation-reduction process
LOC5568284	1803.53	-1.25997	0.1345	-9.36781	7.40507e-21	1.09916e-19	AAEL006711				GO:0005739,GO:0005740,GO:0016020,GO:0016021,GO:0043065	mitochondrion,mitochondrial envelope,membrane,integral component of membrane,positive regulation of apoptotic process
LOC5570241	1106.12	-2.16272	0.23119	-9.35473	8.38145e-21	1.24282e-19	AAEL008190	bhlh factor math6 (atoh8 protein) (bhlh transcription factor) [Source:VB Community Annotation]			GO:0003700,GO:0006355,GO:0030154,GO:0046983	DNA-binding transcription factor activity,regulation of transcription, DNA-templated,cell differentiation,protein dimerization activity
LOC5573206	3690.63	-1.99308	0.213088	-9.35333	8.49289e-21	1.25807e-19	AAEL025245				GO:0003676,GO:0005515	nucleic acid binding,protein binding
LOC5569427	158.011	-2.29589	0.245654	-9.34601	9.1015e-21	1.34686e-19	AAEL007624	IMD pathway signalling NF-kappaB Relish-like transcription factor [Source:VB Community Annotation]	REL2		GO:0003677,GO:0003700,GO:0005515,GO:0005634,GO:0005737,GO:0006355,GO:0042025	DNA binding,DNA-binding transcription factor activity,protein binding,nucleus,cytoplasm,regulation of transcription, DNA-templated,host cell nucleus
LOC5576875	183.917	-2.42472	0.259442	-9.34588	9.1128e-21	1.34716e-19	AAEL003020	Tailless (tll) [Source:UniProtKB/TrEMBL;Acc:A0A1S4F3L6]			GO:0003677,GO:0003700,GO:0003707,GO:0005634,GO:0006355,GO:0008270,GO:0042025,GO:0043565,GO:0046872	DNA binding,DNA-binding transcription factor activity,steroid hormone receptor activity,nucleus,regulation of transcription, DNA-templated,zinc ion binding,host cell nucleus,sequence-specific DNA binding,metal ion binding
LOC5570624	943.819	-0.992016	0.106147	-9.34565	9.13231e-21	1.34868e-19	AAEL008427	smad nuclear interacting protein [Source:VB Community Annotation]			GO:0005515	protein binding
LOC5572344	394.608	-2.43724	0.26081	-9.34487	9.20015e-21	1.35732e-19	AAEL009736
LOC5572001	270.897	3.85052	0.412193	9.34153	9.49527e-21	1.39945e-19	AAEL020201
LOC5567702	493.898	1.1808	0.126536	9.33176	1.04122e-20	1.53305e-19	AAEL006275				GO:0016020,GO:0016021	membrane,integral component of membrane
LOC5566377	2387.68	-0.906519	0.0971463	-9.33148	1.04398e-20	1.53555e-19	AAEL005358				GO:0003676,GO:0003723	nucleic acid binding,RNA binding
LOC5573623	1056.58	1.42609	0.152831	9.33117	1.04706e-20	1.53854e-19	AAEL010602	starch branching enzyme ii [Source:VB Community Annotation]			GO:0003824,GO:0003844,GO:0004553,GO:0005975,GO:0005978,GO:0008152,GO:0016740,GO:0016798,GO:0043169,GO:0102752	catalytic activity,1,4-alpha-glucan branching enzyme activity,hydrolase activity, hydrolyzing O-glycosyl compounds,carbohydrate metabolic process,glycogen biosynthetic process,metabolic process,transferase activity,hydrolase activity, acting on glycosyl bonds,cation binding,1,4-alpha-glucan branching enzyme activity (using a glucosylated glycogenin as primer for glycogen synthesis)
LOC5579105	1764.43	-0.970873	0.104116	-9.32494	1.11045e-20	1.63003e-19	AAEL003865				GO:0023052	signaling
LOC5571809	540.526	-1.66141	0.178177	-9.32451	1.11494e-20	1.63499e-19	AAEL001682	nuclear movement protein nudc [Source:VB Community Annotation]			GO:0005737,GO:0005856,GO:0005874,GO:0007049,GO:0051301	cytoplasm,cytoskeleton,microtubule,cell cycle,cell division
LOC5574866	29287.4	0.889102	0.0953623	9.32342	1.12652e-20	1.65031e-19	AAEL011471	60S ribosomal protein L17 [Source:UniProtKB/Swiss-Prot;Acc:Q1HR65]	RpL17		GO:0003735,GO:0005840,GO:0006412,GO:0015934	structural constituent of ribosome,ribosome,translation,large ribosomal subunit
LOC5566509	343.195	-1.88056	0.201805	-9.31868	1.17796e-20	1.72393e-19	AAEL005433				GO:0000776,GO:0000777,GO:0007049,GO:0007093,GO:1990423	kinetochore,condensed chromosome kinetochore,cell cycle,mitotic cell cycle checkpoint,RZZ complex
LOC5574622	458.259	-2.71033	0.291003	-9.31376	1.23384e-20	1.80391e-19	AAEL022734				GO:0000166,GO:0005524,GO:0016020,GO:0016021,GO:0016887	nucleotide binding,ATP binding,membrane,integral component of membrane,ATPase activity
LOC5573452	1118.87	-0.974877	0.104691	-9.31191	1.25553e-20	1.83377e-19	AAEL010496				GO:0004843,GO:0005515,GO:0006508,GO:0006511,GO:0008233,GO:0008234,GO:0016579,GO:0016787,GO:0036459	thiol-dependent ubiquitin-specific protease activity,protein binding,proteolysis,ubiquitin-dependent protein catabolic process,peptidase activity,cysteine-type peptidase activity,protein deubiquitination,hydrolase activity,thiol-dependent ubiquitinyl hydrolase activity
LOC5573039	469.569	1.98906	0.213802	9.30328	1.36174e-20	1.98526e-19	AAEL021387				GO:0005634	nucleus
LOC5567284	626.386	-2.24018	0.240795	-9.30327	1.36196e-20	1.98526e-19	AAEL021583
LOC5565846	644.303	1.78599	0.191983	9.30285	1.36728e-20	1.99101e-19	AAEL005035	1,4-dihydroxy-2-naphthoate octaprenyltransferase [Source:UniProtKB/TrEMBL;Acc:Q17BA9]			GO:0004659,GO:0009234,GO:0016020,GO:0016021,GO:0016765	prenyltransferase activity,menaquinone biosynthetic process,membrane,integral component of membrane,transferase activity, transferring alkyl or aryl (other than methyl) groups
LOC5574971	409.505	1.5309	0.164573	9.30224	1.37519e-20	2.00054e-19	AAEL019422				GO:0000118,GO:0004407,GO:0005634,GO:0006325,GO:0016575,GO:0016787,GO:0032041,GO:0070932	histone deacetylase complex,histone deacetylase activity,nucleus,chromatin organization,histone deacetylation,hydrolase activity,NAD-dependent histone deacetylase activity (H3-K14 specific),histone H3 deacetylation
LOC5566416	338.179	1.74055	0.187113	9.30213	1.37665e-20	2.00066e-19	AAEL025718				GO:0006807,GO:0016787,GO:0016811	nitrogen compound metabolic process,hydrolase activity,hydrolase activity, acting on carbon-nitrogen (but not peptide) bonds, in linear amides
LOC23687580	390.584	2.00191	0.215311	9.29775	1.43451e-20	2.08268e-19	AAEL017160	GPCR Methuselah Family [Source:VB Community Annotation]	GPRMTH9		GO:0004888,GO:0004930,GO:0007166,GO:0007186,GO:0016021	transmembrane signaling receptor activity,G protein-coupled receptor activity,cell surface receptor signaling pathway,G protein-coupled receptor signaling pathway,integral component of membrane
LOC5578164	1173.68	2.07708	0.223475	9.29444	1.47981e-20	2.14631e-19	AAEL013546	estrogen-related receptor (ERR) [Source:VB Community Annotation]			GO:0003677,GO:0003700,GO:0003707,GO:0005496,GO:0005634,GO:0006355,GO:0008270,GO:0042025,GO:0043401,GO:0043565,GO:0046872	DNA binding,DNA-binding transcription factor activity,steroid hormone receptor activity,steroid binding,nucleus,regulation of transcription, DNA-templated,zinc ion binding,host cell nucleus,steroid hormone mediated signaling pathway,sequence-specific DNA binding,metal ion binding
LOC5578975	1584.68	2.04565	0.220201	9.2899	1.54437e-20	2.23732e-19	AAEL024153				GO:1990817	RNA adenylyltransferase activity
LOC5567743	541.565	1.44466	0.15551	9.28981	1.54562e-20	2.23732e-19	AAEL021429				GO:0003779,GO:0005737,GO:0005856,GO:0005886,GO:0015031,GO:0016020,GO:0016192,GO:0030659,GO:0045010	actin binding,cytoplasm,cytoskeleton,plasma membrane,protein transport,membrane,vesicle-mediated transport,cytoplasmic vesicle membrane,actin nucleation
LOC5575630	917.971	-1.56697	0.168898	-9.27763	1.73298e-20	2.50604e-19	AAEL019944				GO:0003676,GO:0003723,GO:0005515,GO:0006396	nucleic acid binding,RNA binding,protein binding,RNA processing
LOC5564682	416.151	1.18004	0.127215	9.27589	1.76149e-20	2.54475e-19	AAEL023664
LOC5576356	636.037	-1.56733	0.168978	-9.27535	1.77032e-20	2.55497e-19	AAEL019696				GO:0000166,GO:0003774,GO:0003779,GO:0005515,GO:0005524,GO:0005856,GO:0007165,GO:0016459	nucleotide binding,motor activity,actin binding,protein binding,ATP binding,cytoskeleton,signal transduction,myosin complex
LOC5568890	112.79	-2.99091	0.322671	-9.26921	1.87528e-20	2.70378e-19	AAEL007197	amino acid transporter [Source:VB Community Annotation]			GO:0016020,GO:0016021	membrane,integral component of membrane
LOC110674151	202.39	-2.55973	0.276689	-9.25128	2.21819e-20	3.19502e-19	AAEL017976	heat shock protein HSP70 [Source:VB Community Annotation]	HSP70Bb
LOC5578812	1165.57	1.75174	0.189432	9.24738	2.30068e-20	3.31058e-19	AAEL013852
LOC5565777	2274	-1.41202	0.152723	-9.24568	2.33746e-20	3.36019e-19	AAEL004984	cullin-associated NEDD8-dissociated protein 1 [Source:VB Community Annotation]			GO:0010265	SCF complex assembly
LOC5572541	229.042	-1.89818	0.205526	-9.2357	2.56603e-20	3.68514e-19	AAEL028144				GO:0003824,GO:0009058,GO:0030170	catalytic activity,biosynthetic process,pyridoxal phosphate binding
LOC5580184	3250.23	1.85988	0.201422	9.2337	2.61433e-20	3.7508e-19	AAEL002550	polyA-binding protein interacting protein, putative [Source:VB Community Annotation]			GO:0000900,GO:0045947	translation repressor activity, mRNA regulatory element binding,negative regulation of translational initiation
LOC5576894	9216.52	-1.02438	0.110946	-9.23311	2.62881e-20	3.76787e-19	AAEL003046	saposin [Source:VB Community Annotation]			GO:0005576,GO:0005764,GO:0006629,GO:0006665	extracellular region,lysosome,lipid metabolic process,sphingolipid metabolic process
LOC5576056	206.722	1.80604	0.195615	9.23263	2.64062e-20	3.78109e-19	AAEL014207	sugar transporter [Source:VB Community Annotation]			GO:0016020,GO:0016021,GO:0022857,GO:0055085	membrane,integral component of membrane,transmembrane transporter activity,transmembrane transport
LOC5571592	1005.89	-3.07848	0.333761	-9.2236	2.87301e-20	4.10982e-19	AAEL026147				GO:0005509,GO:0005515,GO:0005576,GO:0007275	calcium ion binding,protein binding,extracellular region,multicellular organism development
LOC5568228	2221.9	-2.54033	0.275518	-9.22019	2.96586e-20	4.23847e-19	AAEL006649	tnf receptor associated factor [Source:VB Community Annotation]			GO:0005515,GO:0005737,GO:0007165,GO:0007250,GO:0008270,GO:0042981,GO:0046330,GO:0046872	protein binding,cytoplasm,signal transduction,activation of NF-kappaB-inducing kinase activity,zinc ion binding,regulation of apoptotic process,positive regulation of JNK cascade,metal ion binding
LOC5573629	359.297	-1.65776	0.179827	-9.21864	3.00892e-20	4.29581e-19	AAEL023475				GO:0003723	RNA binding
LOC5571606	530.323	1.30539	0.141619	9.21759	3.03858e-20	4.33004e-19	AAEL009190				GO:0016757,GO:0030176,GO:0035252	transferase activity, transferring glycosyl groups,integral component of endoplasmic reticulum membrane,UDP-xylosyltransferase activity
LOC5567751	1381.43	-2.19403	0.238026	-9.21758	3.03883e-20	4.33004e-19	AAEL025859				GO:0016787	hydrolase activity
LOC5568081	1206.89	-1.1533	0.125122	-9.21737	3.04475e-20	4.33424e-19	AAEL006516	vacuolar ATP synthase subunit h [Source:VB Community Annotation]			GO:0000221,GO:0005515,GO:0006811,GO:0015991,GO:0046961,GO:1902600	vacuolar proton-transporting V-type ATPase, V1 domain,protein binding,ion transport,GO_0015991,proton-transporting ATPase activity, rotational mechanism,proton transmembrane transport
LOC5566485	1896.32	1.88907	0.205062	9.21216	3.19637e-20	4.54564e-19	AAEL005422	pyrroline-5-carboxylate dehydrogenase [Source:VB Community Annotation]			GO:0003842,GO:0006560,GO:0010133,GO:0016491,GO:0016620,GO:0055114	1-pyrroline-5-carboxylate dehydrogenase activity,proline metabolic process,proline catabolic process to glutamate,oxidoreductase activity,oxidoreductase activity, acting on the aldehyde or oxo group of donors, NAD or NADP as acceptor,oxidation-reduction process
LOC5575395	180.057	1.95086	0.212021	9.20122	3.53903e-20	5.02804e-19	AAEL011803	prohibitin, putative [Source:VB Community Annotation]			GO:0005886,GO:0016020,GO:0016021	plasma membrane,membrane,integral component of membrane
LOC5569569	267.919	-1.7907	0.194666	-9.19881	3.61922e-20	5.13696e-19	AAEL007747
LOC5578123	22903.2	0.762298	0.0829071	9.19461	3.7637e-20	5.33685e-19	AAEL003427	40S ribosomal protein S16 [Source:UniProtKB/Swiss-Prot;Acc:P62251]	RpS16		GO:0003735,GO:0005840,GO:0006412	structural constituent of ribosome,ribosome,translation
LOC5567305	849.921	2.28906	0.249021	9.19225	3.84705e-20	5.44974e-19	AAEL005956	caspase (short) [Source:VB Community Annotation]	CASPS16		GO:0004197,GO:0006508,GO:0006915,GO:0008234	cysteine-type endopeptidase activity,proteolysis,apoptotic process,cysteine-type peptidase activity
LOC5569581	1184.9	1.01705	0.110796	9.17944	4.33351e-20	6.1329e-19	AAEL007763	vacuole membrane protein [Source:VB Community Annotation]			GO:0016020,GO:0016021	membrane,integral component of membrane
LOC5577268	3425.48	-0.946453	0.103152	-9.17536	4.50074e-20	6.3634e-19	AAEL013128	elongase, putative [Source:VB Community Annotation]			GO:0006629,GO:0006631,GO:0006633,GO:0016020,GO:0016021,GO:0016740,GO:0102336,GO:0102337,GO:0102338,GO:0102756	lipid metabolic process,fatty acid metabolic process,fatty acid biosynthetic process,membrane,integral component of membrane,transferase activity,3-oxo-arachidoyl-CoA synthase activity,3-oxo-cerotoyl-CoA synthase activity,3-oxo-lignoceronyl-CoA synthase activity,very-long-chain 3-ketoacyl-CoA synthase activity
LOC110677764	23689.4	0.827094	0.0901624	9.17338	4.58422e-20	6.47515e-19	AAEL024434	60S ribosomal protein L13a (Fragment) [Source:UniProtKB/TrEMBL;Acc:Q1HR63]			GO:0003735,GO:0005840,GO:0006412,GO:0015934	structural constituent of ribosome,ribosome,translation,large ribosomal subunit
LOC5572408	127.459	2.98068	0.325041	9.17017	4.72276e-20	6.66439e-19	AAEL009799				GO:0003676	nucleic acid binding
LOC5570505	5072.78	-1.29313	0.141054	-9.16762	4.83577e-20	6.81727e-19	AAEL001411	myosin heavy chain, nonmuscle or smooth muscle [Source:VB Community Annotation]			GO:0000166,GO:0003774,GO:0003779,GO:0005515,GO:0005524,GO:0016459,GO:0030016,GO:0032982,GO:0051015	nucleotide binding,motor activity,actin binding,protein binding,ATP binding,myosin complex,myofibril,myosin filament,actin filament binding
LOC5565658	263.504	1.57523	0.171879	9.16472	4.96759e-20	6.99188e-19	AAEL004910	Post-GPI attachment to proteins factor 3 [Source:UniProtKB/TrEMBL;Acc:Q17BP3]			GO:0000139,GO:0005794,GO:0006506,GO:0016020,GO:0016021	Golgi membrane,Golgi apparatus,GPI anchor biosynthetic process,membrane,integral component of membrane
LOC5574485	25997.9	1.06881	0.116623	9.16468	4.96922e-20	6.99188e-19	AAEL002372	40S ribosomal protein S11 [Source:UniProtKB/TrEMBL;Acc:Q9GSB1]	RpS11		GO:0003735,GO:0005840,GO:0006412	structural constituent of ribosome,ribosome,translation
LOC5572614	496.863	-1.76469	0.192667	-9.15928	5.22464e-20	7.34419e-19	AAEL020840				GO:0003676	nucleic acid binding
LOC5565185	229.942	2.45228	0.267741	9.15917	5.22988e-20	7.34448e-19	AAEL004630				GO:0005515	protein binding
LOC5564457	440.18	1.58413	0.172979	9.15791	5.29107e-20	7.42327e-19	AAEL018318	E3 ubiquitin-protein ligase parkin [Source:UniProtKB/TrEMBL;Acc:A0A1S4G862]			GO:0000151,GO:0004842,GO:0005515,GO:0005634,GO:0005739,GO:0005829,GO:0016567,GO:0046872	ubiquitin ligase complex,ubiquitin-protein transferase activity,protein binding,nucleus,mitochondrion,cytosol,protein ubiquitination,metal ion binding
LOC110680516	85.4941	-2.79781	0.305539	-9.15695	5.3386e-20	7.48276e-19	AAEL022277				GO:0005515,GO:0005886,GO:0007155,GO:0007411	protein binding,plasma membrane,cell adhesion,axon guidance
LOC5572175	1089.03	1.56916	0.17143	9.15337	5.51865e-20	7.72769e-19	AAEL009586
LOC5579809	6124.69	-1.06655	0.116523	-9.1531	5.53207e-20	7.73907e-19	AAEL005528				GO:0003676,GO:0003723,GO:0010494	nucleic acid binding,RNA binding,cytoplasmic stress granule
LOC5566478	3150.54	-1.57712	0.172325	-9.15201	5.58853e-20	7.81056e-19	AAEL005411	equilibrative nucleoside transporter [Source:VB Community Annotation]			GO:0005337,GO:0016020,GO:0016021,GO:1901642	nucleoside transmembrane transporter activity,membrane,integral component of membrane,nucleoside transmembrane transport
LOC5574121	1405.01	-1.86487	0.204003	-9.14135	6.16791e-20	8.61205e-19	AAEL010924	ca-activated cl channel protein [Source:VB Community Annotation]			GO:0016020,GO:0016021	membrane,integral component of membrane
LOC110677951	257.254	1.85528	0.203075	9.13594	6.48411e-20	9.0449e-19	AAEL022152
LOC5575827	1372.51	1.11801	0.122651	9.11533	7.84287e-20	1.09298e-18	AAEL012107	nanos [Source:VB Community Annotation]	NOS		GO:0003723,GO:0005737,GO:0006417,GO:0008270,GO:0046872	RNA binding,cytoplasm,regulation of translation,zinc ion binding,metal ion binding
LOC5577432	1720.27	1.49902	0.164574	9.10851	8.35192e-20	1.16281e-18	AAEL013170	phosphatidylcholine-sterol acyltransferase (lecithin-cholesterol acyltransferase) [Source:VB Community Annotation]			GO:0006629,GO:0008374	lipid metabolic process,O-acyltransferase activity
LOC5580305	585.99	-1.19792	0.131523	-9.10804	8.38804e-20	1.16673e-18	AAEL002996	dolichyl glycosyltransferase [Source:VB Community Annotation]			GO:0005783,GO:0005789,GO:0006486,GO:0006490,GO:0016020,GO:0016021,GO:0016740,GO:0016757,GO:0016758,GO:0042283	endoplasmic reticulum,endoplasmic reticulum membrane,protein glycosylation,oligosaccharide-lipid intermediate biosynthetic process,membrane,integral component of membrane,transferase activity,transferase activity, transferring glycosyl groups,transferase activity, transferring hexosyl groups,dolichyl pyrophosphate Glc1Man9GlcNAc2 alpha-1,3-glucosyltransferase activity
LOC5579190	800.442	-1.88821	0.207394	-9.10445	8.6706e-20	1.20488e-18	AAEL003899	sugar transporter [Source:VB Community Annotation]			GO:0016020,GO:0016021,GO:0022857,GO:0055085	membrane,integral component of membrane,transmembrane transporter activity,transmembrane transport
LOC5574001	574.469	1.15358	0.126746	9.10148	8.91063e-20	1.23706e-18	AAEL010831				GO:0004842,GO:0006996,GO:0016020,GO:0016021,GO:0016567,GO:0016740,GO:0046872	ubiquitin-protein transferase activity,organelle organization,membrane,integral component of membrane,protein ubiquitination,transferase activity,metal ion binding
LOC5567241	1858.76	1.43715	0.157988	9.09658	9.32171e-20	1.2929e-18	AAEL000857				GO:0003676,GO:0005634,GO:0008270,GO:0046872	nucleic acid binding,nucleus,zinc ion binding,metal ion binding
LOC5569159	3816.92	1.81998	0.200078	9.09632	9.34482e-20	1.29487e-18	AAEL023413				GO:0003676	nucleic acid binding
LOC5574256	252.556	2.00871	0.220829	9.09621	9.35374e-20	1.29488e-18	AAEL011014				GO:0016020,GO:0016021	membrane,integral component of membrane
LOC5579106	365.93	1.53911	0.169386	9.08641	1.02365e-19	1.41575e-18	AAEL003847				GO:0046872	metal ion binding
LOC5577893	5154.47	-1.18241	0.130201	-9.08141	1.07177e-19	1.48089e-18	AAEL013407	Catalase [Source:UniProtKB/TrEMBL;Acc:Q16J86]	Cat	CAT1B	GO:0004096,GO:0004601,GO:0006979,GO:0016491,GO:0020037,GO:0042744,GO:0046872,GO:0055114,GO:0098869	catalase activity,peroxidase activity,response to oxidative stress,oxidoreductase activity,heme binding,hydrogen peroxide catabolic process,metal ion binding,oxidation-reduction process,cellular oxidant detoxification
LOC5565718	10634.5	-1.14675	0.126338	-9.07684	1.11774e-19	1.54295e-18	AAEL014959	heterogeneous nuclear ribonucleoprotein k [Source:VB Community Annotation]			GO:0003676,GO:0003723	nucleic acid binding,RNA binding
LOC110677849	292.823	-1.60259	0.17665	-9.07214	1.16699e-19	1.6094e-18	AAEL019625				GO:0003682,GO:0030154	chromatin binding,cell differentiation
LOC5569086	1137.01	-2.60134	0.286815	-9.06976	1.19283e-19	1.64349e-18	AAEL001220	myosin-VIIa (Protein crinkled) [Source:VB Community Annotation]	ck		GO:0000166,GO:0003774,GO:0003779,GO:0005515,GO:0005524,GO:0005737,GO:0005856,GO:0007605,GO:0008407,GO:0016459,GO:0030048,GO:0030898,GO:0032027,GO:0035317,GO:0048800,GO:0051015	nucleotide binding,motor activity,actin binding,protein binding,ATP binding,cytoplasm,cytoskeleton,sensory perception of sound,chaeta morphogenesis,myosin complex,actin filament-based movement,actin-dependent ATPase activity,myosin light chain binding,imaginal disc-derived wing hair organization,antennal morphogenesis,actin filament binding
LOC5570369	1248.3	-1.56419	0.172531	-9.06612	1.23332e-19	1.69768e-18	AAEL008266				GO:0003677,GO:0006355,GO:0043565	DNA binding,regulation of transcription, DNA-templated,sequence-specific DNA binding
LOC5566255	1011.78	2.17664	0.240163	9.06318	1.26704e-19	1.74245e-18	AAEL005286				GO:0046872	metal ion binding
LOC5578837	3342.62	1.79103	0.197641	9.06203	1.28041e-19	1.75917e-18	AAEL013877	Glucosamine-6-phosphate isomerase (EC 3.5.99.6)(Glucosamine-6-phosphate deaminase)(GlcN6P deaminase)(GNPDA) [Source:VB Community Annotation]			GO:0004342,GO:0005737,GO:0005975,GO:0006043,GO:0006044,GO:0006091,GO:0016787	glucosamine-6-phosphate deaminase activity,cytoplasm,carbohydrate metabolic process,glucosamine catabolic process,N-acetylglucosamine metabolic process,generation of precursor metabolites and energy,hydrolase activity
LOC5565223	372.192	1.33708	0.147582	9.05992	1.30546e-19	1.79191e-18	AAEL027866				GO:0005267,GO:0006811,GO:0016020,GO:0016021,GO:0071805	potassium channel activity,ion transport,membrane,integral component of membrane,potassium ion transmembrane transport
LOC5564164	4259.3	-2.96825	0.327663	-9.05886	1.31827e-19	1.80778e-18	AAEL024144				GO:0005515,GO:0016021	protein binding,integral component of membrane
LOC5567712	97.832	-2.60832	0.288035	-9.05558	1.35841e-19	1.86108e-18	AAEL024780				GO:0006355,GO:0046983	regulation of transcription, DNA-templated,protein dimerization activity
LOC5568362	270.508	-2.10168	0.232241	-9.04958	1.43524e-19	1.9645e-18	AAEL001098	clip-domain serine protease, putative [Source:VB Community Annotation]			GO:0004252,GO:0006508	serine-type endopeptidase activity,proteolysis
LOC110675460	313.887	-1.83134	0.202408	-9.04772	1.45979e-19	1.99623e-18	AAEL021183				GO:0007093,GO:1990423	mitotic cell cycle checkpoint,RZZ complex
LOC5575034	239.998	2.61431	0.28901	9.04573	1.48666e-19	2.03107e-18	AAEL011582				GO:0003723,GO:0005737,GO:0006417,GO:0008270,GO:0046872	RNA binding,cytoplasm,regulation of translation,zinc ion binding,metal ion binding
LOC5576366	1982.13	-0.828524	0.0916133	-9.0437	1.51456e-19	2.06725e-18	AAEL002870	dipeptidyl peptidase iii [Source:VB Community Annotation]			GO:0004177,GO:0005737,GO:0006508,GO:0008233,GO:0008237,GO:0008239,GO:0016787,GO:0046872,GO:0070006	aminopeptidase activity,cytoplasm,proteolysis,peptidase activity,metallopeptidase activity,dipeptidyl-peptidase activity,hydrolase activity,metal ion binding,metalloaminopeptidase activity
LOC5566467	1984.05	-1.99851	0.221311	-9.03033	1.71157e-19	2.33398e-18	AAEL005417	annexin x [Source:VB Community Annotation]			GO:0005509,GO:0005544	calcium ion binding,calcium-dependent phospholipid binding
LOC5574060	766.459	1.34149	0.148632	9.02564	1.78646e-19	2.43383e-18	AAEL010906
LOC5577382	3504.57	-1.27209	0.141011	-9.0212	1.86048e-19	2.5323e-18	AAEL018314
LOC5572982	730.948	1.68467	0.186752	9.0209	1.8655e-19	2.53677e-18	AAEL001930	pra1 protein [Source:VB Community Annotation]			GO:0016020,GO:0016021	membrane,integral component of membrane
LOC5564816	3224.09	-0.923274	0.102386	-9.01762	1.92217e-19	2.60957e-18	AAEL014636	rhoGTPase [Source:VB Community Annotation]			GO:0003924,GO:0005515,GO:0005525,GO:0007264	GTPase activity,protein binding,GTP binding,small GTPase mediated signal transduction
LOC5578673	3764.84	2.50065	0.277308	9.0176	1.92262e-19	2.60957e-18	AAEL003624	sodium/chloride dependent amino acid transporter [Source:VB Community Annotation]			GO:0005328,GO:0015293,GO:0016020,GO:0016021,GO:0055085	,symporter activity,membrane,integral component of membrane,transmembrane transport
LOC5574928	119.531	2.57982	0.286108	9.01696	1.93376e-19	2.62226e-18	AAEL011537
LOC5577433	673.623	1.26249	0.140102	9.01117	2.03862e-19	2.76189e-18	AAEL019845				GO:0016301,GO:0016310,GO:0016740,GO:0032958	kinase activity,phosphorylation,transferase activity,inositol phosphate biosynthetic process
LOC5570801	5093.05	-1.20676	0.133935	-9.01006	2.05949e-19	2.78758e-18	AAEL008575	regulator of chromosome condensation [Source:VB Community Annotation]
LOC5574815	1010.92	-1.52258	0.169302	-8.99332	2.3988e-19	3.24383e-18	AAEL002488	DEAD box ATP-dependent RNA helicase [Source:VB Community Annotation]			GO:0000166,GO:0003676,GO:0003724,GO:0004386,GO:0004518,GO:0004527,GO:0005515,GO:0005524,GO:0016787,GO:0090305	nucleotide binding,nucleic acid binding,RNA helicase activity,helicase activity,nuclease activity,exonuclease activity,protein binding,ATP binding,hydrolase activity,nucleic acid phosphodiester bond hydrolysis
LOC5566545	207.927	2.59522	0.288706	8.98914	2.49179e-19	3.36645e-18	AAEL005479	synaptogyrin, [Source:VB Community Annotation]			GO:0016020,GO:0016021	membrane,integral component of membrane
LOC5564263	2028.4	-1.86281	0.207253	-8.98811	2.51518e-19	3.39492e-18	AAEL004174	T-box transcription factor tbx6 [Source:VB Community Annotation]			GO:0003677,GO:0003700,GO:0005634,GO:0006355	DNA binding,DNA-binding transcription factor activity,nucleus,regulation of transcription, DNA-templated
LOC5579654	541.06	-2.63534	0.29326	-8.98638	2.55507e-19	3.44556e-18	AAEL003970	amino acid transporter [Source:VB Community Annotation]			GO:0016020,GO:0016021	membrane,integral component of membrane
LOC5575496	5930.87	-0.735237	0.0818599	-8.98165	2.66742e-19	3.59374e-18	AAEL027465				GO:0005634,GO:0005694,GO:0006260,GO:0006281,GO:0006974,GO:0035101	nucleus,chromosome,DNA replication,DNA repair,cellular response to DNA damage stimulus,FACT complex
LOC5563880	296.517	1.37868	0.153535	8.97958	2.71805e-19	3.65858e-18	AAEL014198	cdp-diacylglycerol--glycerol-3-phosphate 3-phosphatidyltransferase [Source:VB Community Annotation]			GO:0008654,GO:0016020,GO:0016021,GO:0016780	phospholipid biosynthetic process,membrane,integral component of membrane,phosphotransferase activity, for other substituted phosphate groups
LOC5579829	2842.43	-0.950147	0.105831	-8.978	2.75739e-19	3.70811e-18	AAEL005870	flap endonuclease-1 [Source:VB Community Annotation]			GO:0000287,GO:0003677,GO:0003824,GO:0004518,GO:0004519,GO:0004527,GO:0005634,GO:0005654,GO:0005730,GO:0005739,GO:0006260,GO:0006281,GO:0006284,GO:0006974,GO:0008409,GO:0016787,GO:0016788,GO:0017108,GO:0043137,GO:0046872,GO:0090305	magnesium ion binding,DNA binding,catalytic activity,nuclease activity,endonuclease activity,exonuclease activity,nucleus,nucleoplasm,nucleolus,mitochondrion,DNA replication,DNA repair,base-excision repair,cellular response to DNA damage stimulus,5'-3' exonuclease activity,hydrolase activity,hydrolase activity, acting on ester bonds,5'-flap endonuclease activity,DNA replication, removal of RNA pr…
LOC110678735	1353.44	-2.04255	0.227657	-8.97203	2.91097e-19	3.91104e-18	AAEL023730				GO:0003677,GO:0006355,GO:0043565	DNA binding,regulation of transcription, DNA-templated,sequence-specific DNA binding
LOC5577024	1280.31	2.12041	0.236359	8.97114	2.93471e-19	3.93932e-18	AAEL025729				GO:0003779,GO:0004721,GO:0004725,GO:0006470,GO:0008138,GO:0016311,GO:0016787,GO:0016791,GO:0030837,GO:0035335	actin binding,phosphoprotein phosphatase activity,protein tyrosine phosphatase activity,protein dephosphorylation,protein tyrosine/serine/threonine phosphatase activity,dephosphorylation,hydrolase activity,phosphatase activity,negative regulation of actin filament polymerization,peptidyl-tyrosine dephosphorylation
LOC5577529	145.465	-2.60754	0.290666	-8.9709	2.94089e-19	3.94398e-18	AAEL024332				GO:0004222,GO:0005509,GO:0006508,GO:0008233,GO:0008237,GO:0008270,GO:0016787,GO:0046872	metalloendopeptidase activity,calcium ion binding,proteolysis,peptidase activity,metallopeptidase activity,zinc ion binding,hydrolase activity,metal ion binding
LOC110676734	1281.31	2.28384	0.254665	8.96803	3.01867e-19	4.04086e-18	AAEL019636	Histone H2B [Source:UniProtKB/TrEMBL;Acc:Q17ES2]
LOC5578778	1281.31	2.28384	0.254665	8.96803	3.01867e-19	4.04086e-18	AAEL015683	Histone H2B [Source:UniProtKB/TrEMBL;Acc:Q17ES2]			GO:0000786,GO:0003677,GO:0005634,GO:0005694,GO:0046982	nucleosome,DNA binding,nucleus,chromosome,protein heterodimerization activity
LOC5575629	892.469	-1.81974	0.202956	-8.96615	3.07068e-19	4.10672e-18	AAEL011962
LOC110679374	657.969	-2.21955	0.24757	-8.96537	3.09237e-19	4.13194e-18	AAEL026843
LOC5574017	660.524	1.09135	0.121751	8.96376	3.13782e-19	4.18883e-18	AAEL010860				GO:0005829,GO:0032456,GO:0042147,GO:1990745	cytosol,endocytic recycling,retrograde transport, endosome to Golgi,EARP complex
LOC5578193	264.051	-1.93963	0.216406	-8.96291	3.16215e-19	4.21746e-18	AAEL003481	Glycosyltransferase 25 family member Precursor (EC 2.-.-.-) [Source:VB Community Annotation]			GO:0005783,GO:0005788,GO:0016740,GO:0016757	endoplasmic reticulum,endoplasmic reticulum lumen,transferase activity,transferase activity, transferring glycosyl groups
LOC5564813	1076.26	-2.54861	0.284459	-8.95949	3.26175e-19	4.34631e-18	AAEL014635	engrailed [Source:VB Community Annotation]			GO:0000981,GO:0003677,GO:0005634,GO:0006355,GO:0006357,GO:0007275,GO:0043565	DNA-binding transcription factor activity, RNA polymerase II-specific,DNA binding,nucleus,regulation of transcription, DNA-templated,regulation of transcription by RNA polymerase II,multicellular organism development,sequence-specific DNA binding
LOC5568472	657.038	1.46518	0.163539	8.95919	3.27066e-19	4.35422e-18	AAEL006895	phosphofructokinase [Source:VB Community Annotation]			GO:0000166,GO:0003824,GO:0003872,GO:0005524,GO:0005737,GO:0006002,GO:0006096,GO:0008152,GO:0016301,GO:0016310,GO:0016740,GO:0046872,GO:0061615	nucleotide binding,catalytic activity,6-phosphofructokinase activity,ATP binding,cytoplasm,fructose 6-phosphate metabolic process,glycolytic process,metabolic process,kinase activity,phosphorylation,transferase activity,metal ion binding,glycolytic process through fructose-6-phosphate
LOC5566484	222.084	-2.17636	0.242931	-8.95878	3.28294e-19	4.36659e-18	AAEL005401				GO:0016020,GO:0016021,GO:0048037	membrane,integral component of membrane,obsolete cofactor binding
LOC5567137	584.696	1.49532	0.166922	8.95823	3.29919e-19	4.3842e-18	AAEL005885	arginyltransferase, putative [Source:VB Community Annotation]			GO:0004057,GO:0016598,GO:0016740,GO:0016746	arginyltransferase activity,protein arginylation,transferase activity,transferase activity, transferring acyl groups
LOC5564115	266.123	1.67978	0.187557	8.95607	3.36461e-19	4.46706e-18	AAEL004113
LOC110681199	303.928	1.41909	0.158464	8.9553	3.38826e-19	4.49437e-18	AAEL024622
LOC5572577	117.621	-2.08836	0.233215	-8.95465	3.40819e-19	4.51671e-18	AAEL009915	centrosomal protein [Source:VB Community Annotation]
LOC5578376	224.854	2.02818	0.226568	8.95178	3.49796e-19	4.63147e-18	AAEL019481				GO:0003676,GO:0005515	nucleic acid binding,protein binding
LOC5567511	872.552	-1.42442	0.159197	-8.94754	3.63504e-19	4.8086e-18	AAEL024136
LOC5568428	1452.44	2.32523	0.259908	8.94635	3.67435e-19	4.8562e-18	AAEL006836	dihydropteridine reductase [Source:VB Community Annotation]			GO:0016491,GO:0055114	oxidoreductase activity,oxidation-reduction process
LOC5567477	314.486	-2.08957	0.23363	-8.94392	3.7562e-19	4.95988e-18	AAEL000933				GO:0016020,GO:0016021	membrane,integral component of membrane
LOC5569705	1467.91	-1.15975	0.12969	-8.94244	3.80684e-19	5.02221e-18	AAEL007858	ran GTPase-activating protein [Source:VB Community Annotation]			GO:0005096,GO:0005515,GO:0007165,GO:0043547	GTPase activator activity,protein binding,signal transduction,positive regulation of GTPase activity
LOC110676743	62.2317	2.99096	0.334515	8.94119	3.85002e-19	5.07459e-18	AAEL022461
LOC5576364	1741.04	-1.75074	0.195872	-8.93817	3.95656e-19	5.21031e-18	AAEL002869				GO:0005886,GO:0016020,GO:0016021	plasma membrane,membrane,integral component of membrane
LOC5577615	194.751	1.58975	0.177876	8.93743	3.98339e-19	5.2409e-18	AAEL028088				GO:0005515	protein binding
LOC5567351	445.201	1.42492	0.159456	8.93611	4.03104e-19	5.29882e-18	AAEL021071				GO:0003723,GO:0004812,GO:0004826,GO:0005515	RNA binding,aminoacyl-tRNA ligase activity,phenylalanine-tRNA ligase activity,protein binding
LOC5575202	61.0746	-4.55253	0.509466	-8.93588	4.03939e-19	5.30501e-18	AAEL025585				GO:0003676,GO:0005634,GO:0008270,GO:0046872	nucleic acid binding,nucleus,zinc ion binding,metal ion binding
LOC5575475	870.195	1.78391	0.19965	8.93515	4.0664e-19	5.33569e-18	AAEL021703
LOC5570936	354.453	1.54712	0.17322	8.9315	4.20289e-19	5.50983e-18	AAEL008673	ras-related protein Rab-9, putative [Source:VB Community Annotation]			GO:0003924,GO:0005525	GTPase activity,GTP binding
LOC5577990	752.191	-0.995506	0.111553	-8.92404	4.49562e-19	5.88829e-18	AAEL003401	DNA-directed RNA polymerase II 19 kDa polypeptide rpb7 [Source:VB Community Annotation]			GO:0003676,GO:0003899,GO:0006351	nucleic acid binding,DNA-directed 5'-3' RNA polymerase activity,transcription, DNA-templated
LOC5577224	1426.03	-1.14613	0.128469	-8.9215	4.60019e-19	6.01985e-18	AAEL003147				GO:0003676,GO:0005634,GO:0008270,GO:0046872	nucleic acid binding,nucleus,zinc ion binding,metal ion binding
LOC5577915	1006.19	-1.03013	0.115488	-8.91977	4.67259e-19	6.10912e-18	AAEL003336	tRNA-splicing ligase RtcB homolog [Source:UniProtKB/Swiss-Prot;Acc:Q17FP1]			GO:0000166,GO:0003972,GO:0005524,GO:0005525,GO:0006388,GO:0006396,GO:0008033,GO:0008452,GO:0016874,GO:0016886,GO:0046872,GO:0072669	nucleotide binding,RNA ligase (ATP) activity,ATP binding,GTP binding,tRNA splicing, via endonucleolytic cleavage and ligation,RNA processing,tRNA processing,RNA ligase activity,ligase activity,ligase activity, forming phosphoric ester bonds,metal ion binding,tRNA-splicing ligase complex
LOC5571943	2240.66	0.88792	0.0995679	8.91773	4.75955e-19	6.21724e-18	AAEL009427				GO:0046872	metal ion binding
LOC110678859	1152.16	-0.938039	0.10523	-8.9142	4.9137e-19	6.41286e-18	AAEL022213	26S proteasome non-ATPase regulatory subunit [Source:UniProtKB/TrEMBL;Acc:A0A1S4FP45]			GO:0000502,GO:0030234,GO:0050790	proteasome complex,enzyme regulator activity,regulation of catalytic activity
LOC5571050	517.147	1.44143	0.16171	8.91372	4.93462e-19	6.43441e-18	AAEL019961				GO:0003676	nucleic acid binding
LOC5567414	986.076	-1.91843	0.215274	-8.91157	5.03166e-19	6.55508e-18	AAEL025199				GO:0000166,GO:0003824,GO:0004329,GO:0004486,GO:0004488,GO:0005524,GO:0006730,GO:0016874,GO:0035999,GO:0055114	nucleotide binding,catalytic activity,formate-tetrahydrofolate ligase activity,methylenetetrahydrofolate dehydrogenase [NAD(P)+] activity,methylenetetrahydrofolate dehydrogenase (NADP+) activity,ATP binding,one-carbon metabolic process,ligase activity,tetrahydrofolate interconversion,oxidation-reduction process
LOC5566015	828.148	1.47375	0.165387	8.91097	5.05902e-19	6.58485e-18	AAEL005111				GO:0016020,GO:0016021	membrane,integral component of membrane
LOC5570531	3518.16	-1.24295	0.139501	-8.90995	5.1054e-19	6.6393e-18	AAEL001434	coronin [Source:VB Community Annotation]			GO:0005515	protein binding
LOC5574220	1783.16	1.39768	0.15704	8.90018	5.57548e-19	7.24415e-18	AAEL010991	long-chain-fatty-acid coa ligase [Source:VB Community Annotation]			GO:0003824,GO:0016020,GO:0016021	catalytic activity,membrane,integral component of membrane
LOC5578868	160.93	-2.25461	0.25335	-8.89917	5.62642e-19	7.30383e-18	AAEL003726				GO:0005515	protein binding
LOC5568600	1909.31	1.39706	0.156992	8.89893	5.63891e-19	7.31355e-18	AAEL001102	adenosine kinase [Source:VB Community Annotation]			GO:0004001,GO:0006166,GO:0016301,GO:0016310,GO:0016740,GO:0016773,GO:0044209	adenosine kinase activity,purine ribonucleoside salvage,kinase activity,phosphorylation,transferase activity,phosphotransferase activity, alcohol group as acceptor,AMP salvage
LOC5567332	126.304	-2.12005	0.238298	-8.89664	5.75632e-19	7.45918e-18	AAEL022793				GO:0004842,GO:0016567	ubiquitin-protein transferase activity,protein ubiquitination
LOC5571599	1289.69	2.40256	0.27007	8.89609	5.78476e-19	7.48939e-18	AAEL009189	encore protein [Source:VB Community Annotation]			GO:0003676	nucleic acid binding
LOC5566943	165.206	3.35237	0.376893	8.89476	5.85454e-19	7.57301e-18	AAEL015285
LOC5574335	659.131	1.71953	0.193328	8.89433	5.87711e-19	7.59547e-18	AAEL002349				GO:0008521,GO:0015876,GO:0016020,GO:0016021	acetyl-CoA transmembrane transporter activity,acetyl-CoA transport,membrane,integral component of membrane
LOC5569475	1715.39	-1.17252	0.131846	-8.89311	5.9422e-19	7.6728e-18	AAEL007658	partitioning defective 3, par-3 [Source:VB Community Annotation]			GO:0005515,GO:0007049,GO:0051301	protein binding,cell cycle,cell division
LOC5576197	814.327	1.81989	0.204671	8.89177	6.01451e-19	7.7593e-18	AAEL012388				GO:0003676,GO:0005515	nucleic acid binding,protein binding
LOC5573626	324.283	-2.25037	0.253172	-8.88872	6.18163e-19	7.96786e-18	AAEL027978				GO:0005515,GO:0005886,GO:0007155,GO:0007411,GO:0016020,GO:0016021	protein binding,plasma membrane,cell adhesion,axon guidance,membrane,integral component of membrane
LOC5572388	123.005	2.00089	0.225121	8.88807	6.21807e-19	8.00775e-18	AAEL009778
LOC5566553	1558.27	1.64594	0.185266	8.88418	6.43932e-19	8.28537e-18	AAEL005476				GO:0005515	protein binding
LOC5564628	171.147	1.89927	0.213837	8.88186	6.57496e-19	8.45244e-18	AAEL014550	homeobox protein pknox1 [Source:VB Community Annotation]			GO:0003677,GO:0005634,GO:0006355	DNA binding,nucleus,regulation of transcription, DNA-templated
LOC5567324	1726.49	-1.59592	0.179688	-8.8816	6.59031e-19	8.46471e-18	AAEL019538				GO:0005515,GO:0007275,GO:0016020,GO:0030154,GO:0030215	protein binding,multicellular organism development,membrane,cell differentiation,semaphorin receptor binding
LOC5572014	769.601	-3.26948	0.368252	-8.87836	6.78538e-19	8.70761e-18	AAEL000238	Clip-Domain Serine Protease family D. [Source:VB Community Annotation]	CLIPD9		GO:0004252,GO:0006508,GO:0008233,GO:0008236,GO:0016787	serine-type endopeptidase activity,proteolysis,peptidase activity,serine-type peptidase activity,hydrolase activity
LOC5564592	374.181	-1.75362	0.197531	-8.87771	6.82519e-19	8.751e-18	AAEL004332				GO:0005515,GO:0005929,GO:0035721	protein binding,cilium,intraciliary retrograde transport
LOC5572678	430.654	-2.08046	0.234484	-8.8725	7.15206e-19	9.16205e-18	AAEL009950	homeotic deformed protein, putative [Source:VB Community Annotation]			GO:0000981,GO:0003677,GO:0003700,GO:0005634,GO:0006355,GO:0006357,GO:0007275,GO:0043565	DNA-binding transcription factor activity, RNA polymerase II-specific,DNA binding,DNA-binding transcription factor activity,nucleus,regulation of transcription, DNA-templated,regulation of transcription by RNA polymerase II,multicellular organism development,sequence-specific DNA binding
LOC5564596	2585.55	2.61219	0.294437	8.87181	7.19669e-19	9.21113e-18	AAEL019475				GO:0000812,GO:0003713,GO:0005634,GO:0006338,GO:0007219,GO:0016607,GO:0031151,GO:0034729,GO:0043486,GO:0045944,GO:0051726	Swr1 complex,transcription coactivator activity,nucleus,chromatin remodeling,Notch signaling pathway,nuclear speck,histone methyltransferase activity (H3-K79 specific),histone H3-K79 methylation,histone exchange,positive regulation of transcription by RNA polymerase II,regulation of cell cycle
LOC5567519	94.7262	2.79306	0.314934	8.86873	7.39862e-19	9.45765e-18	AAEL006146
LOC5578196	11460.3	-1.24752	0.140666	-8.86867	7.40226e-19	9.45765e-18	AAEL026652
LOC5566843	21122.2	0.869744	0.0981538	8.86103	7.92771e-19	1.01201e-17	AAEL000823	60S ribosomal protein L35A, putative [Source:UniProtKB/TrEMBL;Acc:Q17N60]	Rpl35		GO:0003735,GO:0005840,GO:0006412	structural constituent of ribosome,ribosome,translation
LOC5576762	1422.55	-1.00589	0.113592	-8.85526	8.34887e-19	1.06485e-17	AAEL012745
LOC5569649	5210.31	-1.48517	0.167732	-8.85441	8.4129e-19	1.07208e-17	AAEL007803	lamin b receptor [Source:VB Community Annotation]			GO:0016020,GO:0016021,GO:0016126,GO:0016628,GO:0055114	membrane,integral component of membrane,sterol biosynthetic process,oxidoreductase activity, acting on the CH-CH group of donors, NAD or NADP as acceptor,oxidation-reduction process
LOC110680552	486.675	1.37032	0.154793	8.85257	8.55267e-19	1.08894e-17	AAEL022803
LOC5565618	694.693	-1.48908	0.168356	-8.84483	9.16662e-19	1.16609e-17	AAEL021782				GO:0007165	signal transduction
LOC5571760	276.297	-2.42508	0.274368	-8.83876	9.6789e-19	1.23018e-17	AAEL009298	2-Keto-3-deoxy-(6-phospho-)gluconate aldolase, putative [Source:VB Community Annotation]			GO:0003824,GO:0016829	catalytic activity,lyase activity
LOC5578957	341.213	1.42072	0.160758	8.83761	9.77851e-19	1.24176e-17	AAEL013942	aminoadipate-semialdehyde dehydrogenase [Source:VB Community Annotation]			GO:0000287,GO:0008897,GO:0016740	magnesium ion binding,holo-[acyl-carrier-protein] synthase activity,transferase activity
LOC5576491	623.886	-2.15745	0.244198	-8.83481	1.00264e-18	1.27213e-17	AAEL002902				GO:0005634,GO:0046983	nucleus,protein dimerization activity
LOC5571498	607.273	2.22702	0.252223	8.82959	1.05064e-18	1.33187e-17	AAEL001626	zinc/iron transporter [Source:VB Community Annotation]			GO:0016020,GO:0016021,GO:0030001,GO:0046873,GO:0055085	membrane,integral component of membrane,metal ion transport,metal ion transmembrane transporter activity,transmembrane transport
LOC5573393	2031	-1.27706	0.144692	-8.82606	1.08429e-18	1.37334e-17	AAEL002080	septin interacting protein, putative [Source:VB Community Annotation]
LOC5570465	8898.54	0.984268	0.111532	8.82502	1.09442e-18	1.38497e-17	AAEL026904
LOC5565754	2569.84	-1.40967	0.159765	-8.82339	1.11043e-18	1.40401e-17	AAEL014965	nova [Source:VB Community Annotation]			GO:0003676,GO:0003723	nucleic acid binding,RNA binding
LOC5566309	915.251	1.1401	0.129253	8.82072	1.13727e-18	1.43671e-17	AAEL005308	pyruvate dehydrogenase [Source:VB Community Annotation]			GO:0004739,GO:0006086,GO:0016491,GO:0016624,GO:0043231,GO:0055114	pyruvate dehydrogenase (acetyl-transferring) activity,acetyl-CoA biosynthetic process from pyruvate,oxidoreductase activity,oxidoreductase activity, acting on the aldehyde or oxo group of donors, disulfide as acceptor,intracellular membrane-bounded organelle,oxidation-reduction process
LOC5578794	7440.84	-0.937431	0.106305	-8.81828	1.1623e-18	1.46705e-17	AAEL003664	lupus la ribonucleoprotein [Source:VB Community Annotation]			GO:0003676,GO:0003723,GO:0005634,GO:0006396,GO:1990904	nucleic acid binding,RNA binding,nucleus,RNA processing,ribonucleoprotein complex
LOC5565721	102.045	2.43472	0.276163	8.81623	1.18375e-18	1.49284e-17	AAEL004957				GO:0016020,GO:0016021	membrane,integral component of membrane
LOC5565770	1276.19	-1.24057	0.140749	-8.81406	1.20695e-18	1.52078e-17	AAEL004986	smg-7 (suppressor with morphological effect on genitalia protein 7) [Source:VB Community Annotation]			GO:0000184,GO:0005515,GO:0005737	nuclear-transcribed mRNA catabolic process, nonsense-mediated decay,protein binding,cytoplasm
LOC5570171	187.833	1.82678	0.2073	8.81222	1.2269e-18	1.54458e-17	AAEL008138	ABC transporter [Source:VB Community Annotation]			GO:0000166,GO:0005524,GO:0016020,GO:0016021,GO:0016887,GO:0042626	nucleotide binding,ATP binding,membrane,integral component of membrane,ATPase activity,ATPase-coupled transmembrane transporter activity
LOC110675298	179.123	-2.18613	0.24814	-8.81008	1.25056e-18	1.57301e-17	AAEL023358
LOC5568359	146.277	-2.3886	0.271124	-8.80997	1.25183e-18	1.57325e-17	AAEL001084	Clip-Domain Serine Protease family B. Protease homologue. [Source:VB Community Annotation]	CLIPB21		GO:0004252,GO:0006508	serine-type endopeptidase activity,proteolysis
LOC5571722	1859.06	-2.65639	0.301583	-8.80817	1.27205e-18	1.59729e-17	AAEL009249	Coronin [Source:UniProtKB/TrEMBL;Acc:A0A1S4FM51]			GO:0000139,GO:0005515,GO:0005737,GO:0005794,GO:0005829	Golgi membrane,protein binding,cytoplasm,Golgi apparatus,cytosol
LOC5576856	238.216	-2.75735	0.313077	-8.80726	1.28237e-18	1.60886e-17	AAEL020057				GO:0016020,GO:0016021	membrane,integral component of membrane
LOC5568417	407.192	-2.5586	0.290542	-8.8063	1.29349e-18	1.62142e-17	AAEL023131				GO:0003677,GO:0006357,GO:0046983	DNA binding,regulation of transcription by RNA polymerase II,protein dimerization activity
LOC5575745	306.273	1.52154	0.172799	8.80522	1.30598e-18	1.63567e-17	AAEL012047				GO:0003676,GO:0003700,GO:0005634,GO:0008270,GO:0046872	nucleic acid binding,DNA-binding transcription factor activity,nucleus,zinc ion binding,metal ion binding
LOC5567327	66.4485	-3.62746	0.412092	-8.80253	1.33762e-18	1.67386e-17	AAEL005992	adam (a disintegrin and metalloprotease) [Source:VB Community Annotation]			GO:0004222,GO:0006508,GO:0008237,GO:0016020,GO:0016021	metalloendopeptidase activity,proteolysis,metallopeptidase activity,membrane,integral component of membrane
LOC5569953	145.289	2.82744	0.321262	8.80104	1.35556e-18	1.69486e-17	AAEL008049				GO:0003677,GO:0005634	DNA binding,nucleus
LOC5573576	818.196	1.44656	0.164366	8.80086	1.35778e-18	1.69617e-17	AAEL002104				GO:0003676,GO:0005634,GO:0008270,GO:0046872	nucleic acid binding,nucleus,zinc ion binding,metal ion binding
LOC23687673	3078.08	-1.05428	0.119797	-8.8005	1.36206e-18	1.70007e-17	AAEL014271				GO:0005509	calcium ion binding
LOC5575485	607.865	1.25206	0.142403	8.79237	1.46437e-18	1.8262e-17	AAEL011868				GO:0003676,GO:0003700,GO:0005634,GO:0006355,GO:0008270,GO:0046872	nucleic acid binding,DNA-binding transcription factor activity,nucleus,regulation of transcription, DNA-templated,zinc ion binding,metal ion binding
LOC5568230	208.923	1.72956	0.196732	8.79145	1.47638e-18	1.83961e-17	AAEL006676				GO:0016020,GO:0016021	membrane,integral component of membrane
LOC110680473	135.062	-2.30582	0.262319	-8.79013	1.49391e-18	1.85987e-17	AAEL020891
LOC5578143	228.43	-2.27145	0.2585	-8.78705	1.53539e-18	1.90988e-17	AAEL013526				GO:0016020,GO:0016021	membrane,integral component of membrane
LOC5564736	1711.28	-2.79406	0.318055	-8.78485	1.56572e-18	1.94595e-17	AAEL019576				GO:0003779,GO:0005515	actin binding,protein binding
LOC5567533	634.86	1.28499	0.146291	8.78375	1.58111e-18	1.96341e-17	AAEL006140	mitosis inhibitor protein kinase [Source:VB Community Annotation]			GO:0000166,GO:0004672,GO:0004674,GO:0005524,GO:0006468,GO:0016020	nucleotide binding,protein kinase activity,protein serine/threonine kinase activity,ATP binding,protein phosphorylation,membrane
LOC5579888	519.289	-2.87802	0.327722	-8.7819	1.60738e-18	1.99433e-17	AAEL001046	phosphatase fragment [Source:VB Community Annotation]			GO:0004725,GO:0006470,GO:0016311,GO:0016791,GO:0035335	protein tyrosine phosphatase activity,protein dephosphorylation,dephosphorylation,phosphatase activity,peptidyl-tyrosine dephosphorylation
LOC5566959	41432.1	0.999579	0.11389	8.77668	1.68366e-18	2.08719e-17	AAEL005722	60S ribosomal protein L7a [Source:VB Community Annotation]	RpL26		GO:0003723,GO:0005840,GO:0022625,GO:0042254,GO:1990904	RNA binding,ribosome,cytosolic large ribosomal subunit,ribosome biogenesis,ribonucleoprotein complex
LOC5574708	135.73	1.9988	0.22775	8.77625	1.6901e-18	2.09339e-17	AAEL011338				GO:0005515	protein binding
LOC5571246	246.199	1.49549	0.170501	8.77112	1.76903e-18	2.1893e-17	AAEL001551				GO:0003676,GO:0005634,GO:0008270,GO:0046872	nucleic acid binding,nucleus,zinc ion binding,metal ion binding
LOC5571895	305.113	2.27958	0.260062	8.76552	1.85917e-18	2.29891e-17	AAEL009380	phospholipase c beta [Source:VB Community Annotation]			GO:0004435,GO:0005509,GO:0006629,GO:0007165,GO:0008081,GO:0016042,GO:0016787,GO:0035556	phosphatidylinositol phospholipase C activity,calcium ion binding,lipid metabolic process,signal transduction,phosphoric diester hydrolase activity,lipid catabolic process,hydrolase activity,intracellular signal transduction
LOC5580309	925.101	-1.86597	0.212899	-8.76456	1.8751e-18	2.31665e-17	AAEL002999	GTPase_rho [Source:VB Community Annotation]			GO:0003924,GO:0005525,GO:0007264	GTPase activity,GTP binding,small GTPase mediated signal transduction
LOC5564972	4894.56	-0.859385	0.0980878	-8.76139	1.92862e-18	2.38075e-17	AAEL004523	preprotein translocase secy subunit (sec61) [Source:VB Community Annotation]			GO:0005789,GO:0015031,GO:0016020,GO:0016021	endoplasmic reticulum membrane,protein transport,membrane,integral component of membrane
LOC110680452	1188.95	-2.20811	0.252134	-8.75767	1.9933e-18	2.45851e-17	AAEL024321				GO:0003677,GO:0005515,GO:0016514,GO:0071564,GO:0071565	DNA binding,protein binding,SWI/SNF complex,npBAF complex,nBAF complex
LOC5567885	104.245	2.38767	0.272872	8.75015	2.13071e-18	2.62577e-17	AAEL006359	sulfotransferase (sult) [Source:VB Community Annotation]			GO:0008146,GO:0016740	sulfotransferase activity,transferase activity
LOC5578243	24598.9	1.03567	0.118364	8.74983	2.13673e-18	2.63098e-17	AAEL015006	60S ribosomal protein L23 (L17A)(AeRpL17A) [Source:VB Community Annotation]	RpL23		GO:0003735,GO:0005840,GO:0006412	structural constituent of ribosome,ribosome,translation
LOC5578781	5531.51	1.98479	0.226847	8.74946	2.1438e-18	2.63745e-17	AAEL019637				GO:0000786,GO:0003677,GO:0005634,GO:0005694,GO:0006334,GO:0042025,GO:0046982	nucleosome,DNA binding,nucleus,chromosome,nucleosome assembly,host cell nucleus,protein heterodimerization activity
LOC5569811	243.046	3.1595	0.361183	8.74765	2.17851e-18	2.6779e-17	AAEL001295
LOC5564168	227.775	1.59625	0.182484	8.74736	2.184e-18	2.68239e-17	AAEL018312	Structure-specific endonuclease subunit SLX1 homolog [Source:UniProtKB/TrEMBL;Acc:A0A1S4G7M6]			GO:0004518,GO:0004519,GO:0004520,GO:0005634,GO:0006281,GO:0006310,GO:0006974,GO:0016787,GO:0017108,GO:0033557,GO:0046872,GO:0090305	nuclease activity,endonuclease activity,endodeoxyribonuclease activity,nucleus,DNA repair,DNA recombination,cellular response to DNA damage stimulus,hydrolase activity,5'-flap endonuclease activity,Slx1-Slx4 complex,metal ion binding,nucleic acid phosphodiester bond hydrolysis
LOC5575569	1602.73	-1.01297	0.115828	-8.74545	2.22127e-18	2.72587e-17	AAEL019785				GO:0000166,GO:0003924,GO:0005096,GO:0005515,GO:0005525,GO:0007165,GO:0016020,GO:0043547,GO:0046872	nucleotide binding,GTPase activity,GTPase activator activity,protein binding,GTP binding,signal transduction,membrane,positive regulation of GTPase activity,metal ion binding
LOC110680617	62.9606	-4.03536	0.461495	-8.74411	2.24784e-18	2.75616e-17	AAEL026549
LOC5567163	28281.4	0.909717	0.104109	8.73809	2.37074e-18	2.90441e-17	AAEL005901	40S ribosomal protein S3a [Source:UniProtKB/Swiss-Prot;Acc:Q1HRR3]	RpS3a
LOC5568622	2064.89	2.01397	0.230569	8.73478	2.44128e-18	2.98831e-17	AAEL006968				GO:0030246	carbohydrate binding
LOC5571718	1597.5	1.90858	0.218529	8.73377	2.46322e-18	3.01265e-17	AAEL009235				GO:0003676	nucleic acid binding
LOC110676139	177.081	-2.17058	0.248576	-8.73206	2.50079e-18	3.05603e-17	AAEL026446
LOC5565755	6809.26	2.01548	0.230937	8.72738	2.60641e-18	3.18243e-17	AAEL004978	DEAD box ATP-dependent RNA helicase [Source:VB Community Annotation]			GO:0000166,GO:0003676,GO:0003724,GO:0004386,GO:0005524,GO:0016787	nucleotide binding,nucleic acid binding,RNA helicase activity,helicase activity,ATP binding,hydrolase activity
LOC5573053	1235.24	-1.65312	0.189444	-8.72613	2.63538e-18	3.21512e-17	AAEL010222	transcription factor GATA-4 (GATA binding factor-4) [Source:VB Community Annotation]			GO:0003700,GO:0005634,GO:0006355,GO:0006357,GO:0008270,GO:0043565,GO:0046872	DNA-binding transcription factor activity,nucleus,regulation of transcription, DNA-templated,regulation of transcription by RNA polymerase II,zinc ion binding,sequence-specific DNA binding,metal ion binding
LOC5570910	186.06	-2.28429	0.261787	-8.72576	2.64407e-18	3.22302e-17	AAEL018240				GO:0016020,GO:0016021	membrane,integral component of membrane
LOC110676314	319.12	-2.12702	0.243871	-8.72189	2.73604e-18	3.33235e-17	AAEL024200				GO:0003676,GO:0005634,GO:0008270	nucleic acid binding,nucleus,zinc ion binding
LOC5574178	1210.68	-1.80953	0.207518	-8.71985	2.78567e-18	3.38996e-17	AAEL019806				GO:0016020,GO:0016021	membrane,integral component of membrane
LOC5567787	981.37	-1.29171	0.148147	-8.71909	2.80455e-18	3.4101e-17	AAEL000118	Cleavage and polyadenylation specificity factor subunit 2 [Source:UniProtKB/TrEMBL;Acc:A0A1S4EUZ6]			GO:0003723,GO:0005634,GO:0005847,GO:0006378,GO:0006379,GO:0006397	RNA binding,nucleus,mRNA cleavage and polyadenylation specificity factor complex,mRNA polyadenylation,mRNA cleavage,mRNA processing
LOC5574431	2338.46	-0.805313	0.0924547	-8.71035	3.02937e-18	3.68039e-17	AAEL011150	sex-lethal [Source:VB Community Annotation]	Sxl		GO:0003676,GO:0003723,GO:1990904	nucleic acid binding,RNA binding,ribonucleoprotein complex
LOC5571208	968.748	1.4559	0.167264	8.70418	3.19875e-18	3.88295e-17	AAEL008893	xaa-pro dipeptidase pepd/pepq(e.coli) [Source:VB Community Annotation]			GO:0004177,GO:0006508,GO:0016787,GO:0030145,GO:0046872,GO:0070006	aminopeptidase activity,proteolysis,hydrolase activity,manganese ion binding,metal ion binding,metalloaminopeptidase activity
LOC23687986	1238.05	-0.932728	0.107174	-8.70296	3.23351e-18	3.92187e-17	AAEL017566				GO:0000166,GO:0003677,GO:0003909,GO:0003910,GO:0005524,GO:0006260,GO:0006281,GO:0006310,GO:0006974,GO:0016874,GO:0051103,GO:0071897	nucleotide binding,DNA binding,DNA ligase activity,DNA ligase (ATP) activity,ATP binding,DNA replication,DNA repair,DNA recombination,cellular response to DNA damage stimulus,ligase activity,DNA ligation involved in DNA repair,DNA biosynthetic process
LOC5573276	2200.88	-2.20213	0.253131	-8.69959	3.33076e-18	4.03647e-17	AAEL010377				GO:0005634,GO:0031144,GO:0071630	nucleus,proteasome localization,nuclear protein quality control by the ubiquitin-proteasome system
LOC5575494	143.713	1.80684	0.207724	8.6983	3.36881e-18	4.0792e-17	AAEL020018				GO:0006897,GO:0007015,GO:0016020,GO:0016021,GO:0022857,GO:0055085	endocytosis,actin filament organization,membrane,integral component of membrane,transmembrane transporter activity,transmembrane transport
LOC5568274	1865.98	1.82863	0.210261	8.69695	3.4092e-18	4.12468e-17	AAEL022413				GO:0003676,GO:0003723	nucleic acid binding,RNA binding
LOC5579140	2835.95	-0.867226	0.0997285	-8.69588	3.44159e-18	4.16042e-17	AAEL019512				GO:0005515,GO:0005886,GO:0005923,GO:0070830,GO:0090162	protein binding,plasma membrane,bicellular tight junction,bicellular tight junction assembly,establishment of epithelial cell polarity
LOC110674128	218.876	-2.17698	0.250361	-8.69536	3.45721e-18	4.17584e-17	AAEL021820
LOC5571706	344.396	-2.01139	0.231409	-8.69192	3.56377e-18	4.30099e-17	AAEL009232	long-chain-fatty-acid coa ligase [Source:VB Community Annotation]			GO:0003824,GO:0016020,GO:0016021	catalytic activity,membrane,integral component of membrane
LOC5578785	1360.3	2.27903	0.262226	8.69108	3.58998e-18	4.32904e-17	AAEL021350	Histone H4 [Source:UniProtKB/TrEMBL;Acc:Q16IE4]
LOC110674174	293.264	1.66402	0.191487	8.68997	3.62523e-18	4.36794e-17	AAEL024982
LOC5570536	225.49	-1.80682	0.207987	-8.68717	3.71568e-18	4.47323e-17	AAEL001437				GO:0005515,GO:0006355	protein binding,regulation of transcription, DNA-templated
LOC5572568	66.9437	-3.8947	0.448547	-8.68292	3.85727e-18	4.63986e-17	AAEL009886	sodium-coupled cation-chloride cotransporter [Source:VB Community Annotation]	CCC3		GO:0006811,GO:0015293,GO:0015377,GO:0016020,GO:0016021,GO:0022857,GO:0055085,GO:1902476	ion transport,symporter activity,cation:chloride symporter activity,membrane,integral component of membrane,transmembrane transporter activity,transmembrane transport,chloride transmembrane transport
LOC5564544	1823.68	-2.04189	0.235187	-8.68196	3.88999e-18	4.67536e-17	AAEL004319	epidermal growth factor receptor [Source:VB Community Annotation]			GO:0000166,GO:0004672,GO:0004713,GO:0004714,GO:0005524,GO:0006468,GO:0007169,GO:0016020,GO:0016021,GO:0016301,GO:0016310,GO:0016740,GO:0018108	nucleotide binding,protein kinase activity,protein tyrosine kinase activity,transmembrane receptor protein tyrosine kinase activity,ATP binding,protein phosphorylation,transmembrane receptor protein tyrosine kinase signaling pathway,membrane,integral component of membrane,kinase activity,phosphorylation,transferase activity,peptidyl-tyrosine phosphorylation
LOC5578341	1064.44	1.0156	0.117014	8.67931	3.98185e-18	4.78182e-17	AAEL003535
LOC5576915	44.9666	4.42698	0.510103	8.6786	4.0067e-18	4.80771e-17	AAEL012866				GO:0008080	N-acetyltransferase activity
LOC5578192	142.19	-2.17177	0.250279	-8.67741	4.04869e-18	4.85411e-17	AAEL003464				GO:0016020,GO:0016021	membrane,integral component of membrane
LOC5576852	549.6	1.44353	0.166412	8.67448	4.15452e-18	4.9769e-17	AAEL012835	85 kda calcium-independent phospholipase A2 (ipla2) [Source:VB Community Annotation]			GO:0005515,GO:0006629,GO:0016042,GO:0016787	protein binding,lipid metabolic process,lipid catabolic process,hydrolase activity
LOC5579210	417.559	-1.80883	0.208554	-8.67321	4.20095e-18	5.02839e-17	AAEL027204				GO:0005509,GO:0005634,GO:0005737,GO:0005886,GO:0007275,GO:0008270,GO:0014018,GO:0016020,GO:0016055,GO:0030178,GO:0046872	calcium ion binding,nucleus,cytoplasm,plasma membrane,multicellular organism development,zinc ion binding,neuroblast fate specification,membrane,Wnt signaling pathway,negative regulation of Wnt signaling pathway,metal ion binding
LOC5569926	1075.07	1.3348	0.153916	8.67223	4.23726e-18	5.06769e-17	AAEL008020	sorting nexin [Source:VB Community Annotation]			GO:0016020,GO:0016021,GO:0035091	membrane,integral component of membrane,phosphatidylinositol binding
LOC5572161	3942.33	-1.22953	0.141786	-8.67172	4.25656e-18	5.0866e-17	AAEL009574	elongase, putative [Source:VB Community Annotation]			GO:0006629,GO:0006631,GO:0006633,GO:0016020,GO:0016021,GO:0016740,GO:0102336,GO:0102337,GO:0102338,GO:0102756	lipid metabolic process,fatty acid metabolic process,fatty acid biosynthetic process,membrane,integral component of membrane,transferase activity,3-oxo-arachidoyl-CoA synthase activity,3-oxo-cerotoyl-CoA synthase activity,3-oxo-lignoceronyl-CoA synthase activity,very-long-chain 3-ketoacyl-CoA synthase activity
LOC5579958	4378.91	1.84106	0.212405	8.66769	4.40972e-18	5.26532e-17	AAEL007584
LOC5565761	2629.27	1.3429	0.154948	8.6668	4.44427e-18	5.30223e-17	AAEL004980	Ubiquitinyl hydrolase 1 [Source:UniProtKB/TrEMBL;Acc:Q17BE1]			GO:0004843,GO:0006508,GO:0006511,GO:0008233,GO:0008234,GO:0008270,GO:0016579,GO:0016787,GO:0036459,GO:0046872	thiol-dependent ubiquitin-specific protease activity,proteolysis,ubiquitin-dependent protein catabolic process,peptidase activity,cysteine-type peptidase activity,zinc ion binding,protein deubiquitination,hydrolase activity,thiol-dependent ubiquitinyl hydrolase activity,metal ion binding
LOC5572762	1246.76	-1.00649	0.116144	-8.66591	4.47926e-18	5.33962e-17	AAEL027479				GO:0005515,GO:0005634	protein binding,nucleus
LOC5563812	275.224	-1.69904	0.196115	-8.6635	4.57499e-18	5.44928e-17	AAEL014142	phosphatidylinositol synthase [Source:VB Community Annotation]			GO:0003881,GO:0005794,GO:0006629,GO:0008654,GO:0016020,GO:0016021,GO:0016740,GO:0016780	CDP-diacylglycerol-inositol 3-phosphatidyltransferase activity,Golgi apparatus,lipid metabolic process,phospholipid biosynthetic process,membrane,integral component of membrane,transferase activity,phosphotransferase activity, for other substituted phosphate groups
LOC5568027	660.188	-1.80989	0.209157	-8.65324	5.00592e-18	5.95593e-17	AAEL024438				GO:0005794,GO:0008376,GO:0016020,GO:0016021,GO:0016740,GO:0032580	Golgi apparatus,acetylgalactosaminyltransferase activity,membrane,integral component of membrane,transferase activity,Golgi cisterna membrane
LOC110675802	178.992	-1.77277	0.204869	-8.65318	5.00851e-18	5.95593e-17	AAEL023633
LOC5569978	3492.76	-2.45606	0.284112	-8.64469	5.39519e-18	6.41052e-17	AAEL008069	notch [Source:VB Community Annotation]			GO:0005509,GO:0005515,GO:0006508,GO:0008236,GO:0016020,GO:0016021	calcium ion binding,protein binding,proteolysis,serine-type peptidase activity,membrane,integral component of membrane
LOC23687890	1185.6	0.980935	0.113492	8.64322	5.46501e-18	6.4882e-17	AAEL024411				GO:0000166,GO:0004672,GO:0005524,GO:0006468	nucleotide binding,protein kinase activity,ATP binding,protein phosphorylation
LOC5564186	2225.44	-1.11674	0.12924	-8.6408	5.58188e-18	6.62156e-17	AAEL026297				GO:0002224,GO:0004888,GO:0005515,GO:0006955,GO:0007165,GO:0016020,GO:0016021	toll-like receptor signaling pathway,transmembrane signaling receptor activity,protein binding,immune response,signal transduction,membrane,integral component of membrane
LOC5575828	3121.88	-1.03555	0.119848	-8.6405	5.59683e-18	6.6339e-17	AAEL012095	26S protease regulatory subunit [Source:VB Community Annotation]			GO:0000166,GO:0000502,GO:0005524,GO:0005737,GO:0016787,GO:0016887,GO:0030163,GO:0036402,GO:1901800	nucleotide binding,proteasome complex,ATP binding,cytoplasm,hydrolase activity,ATPase activity,protein catabolic process,proteasome-activating ATPase activity,positive regulation of proteasomal protein catabolic process
LOC5578654	496.339	1.86044	0.215331	8.63989	5.62648e-18	6.66363e-17	AAEL024913				GO:0016787	hydrolase activity
LOC5572559	510.64	-1.36781	0.158441	-8.63294	5.97933e-18	7.07578e-17	AAEL009895	neprilysin [Source:VB Community Annotation]			GO:0004222,GO:0005886,GO:0006508,GO:0008233,GO:0008237,GO:0016020,GO:0016021,GO:0016787,GO:0046872	metalloendopeptidase activity,plasma membrane,proteolysis,peptidase activity,metallopeptidase activity,membrane,integral component of membrane,hydrolase activity,metal ion binding
LOC110674691	4504.57	-1.92483	0.223026	-8.6305	6.10823e-18	7.22246e-17	AAEL020715
LOC5575821	301.519	-3.07534	0.356381	-8.62937	6.16914e-18	7.28857e-17	AAEL012091				GO:0003677,GO:0005634,GO:0006338	DNA binding,nucleus,chromatin remodeling
LOC5580175	378.667	-2.08915	0.242129	-8.62827	6.22845e-18	7.35269e-17	AAEL002555	sodium/solute symporter [Source:VB Community Annotation]			GO:0016020,GO:0016021,GO:0022857,GO:0055085	membrane,integral component of membrane,transmembrane transporter activity,transmembrane transport
LOC5578906	2523.95	1.18263	0.137096	8.62629	6.33758e-18	7.47548e-17	AAEL013905				GO:0005515,GO:0016422,GO:0080009,GO:0099122	protein binding,mRNA (2'-O-methyladenosine-N6-)-methyltransferase activity,mRNA methylation,RNA polymerase II C-terminal domain binding
LOC5567339	1670.01	2.31324	0.268224	8.62429	6.44893e-18	7.60068e-17	AAEL006012	factor for adipocyte differentiation [Source:VB Community Annotation]			GO:0005515,GO:0016020,GO:0016021	protein binding,membrane,integral component of membrane
LOC5575635	512.133	-1.09131	0.126546	-8.6238	6.47705e-18	7.62766e-17	AAEL011968
LOC5576427	1366.13	1.86522	0.216334	8.62194	6.58314e-18	7.74634e-17	AAEL012519	actin binding protein, putative [Source:VB Community Annotation]			GO:0003779,GO:0005737,GO:0005856,GO:0030036	actin binding,cytoplasm,cytoskeleton,actin cytoskeleton organization
LOC5568069	57.7733	-3.87366	0.449297	-8.6216	6.60223e-18	7.76255e-17	AAEL006533	Ets domain-containing protein [Source:VB Community Annotation]			GO:0003677,GO:0003700,GO:0005634,GO:0006355,GO:0042025,GO:0043565	DNA binding,DNA-binding transcription factor activity,nucleus,regulation of transcription, DNA-templated,host cell nucleus,sequence-specific DNA binding
LOC5577331	2101.28	0.906125	0.105112	8.62058	6.66174e-18	7.8262e-17	AAEL021314				GO:0000139,GO:0008643,GO:0015165,GO:0016020,GO:0016021,GO:0090481	Golgi membrane,carbohydrate transport,pyrimidine nucleotide-sugar transmembrane transporter activity,membrane,integral component of membrane,pyrimidine nucleotide-sugar transmembrane transport
LOC5575760	2132.45	-3.01562	0.350222	-8.6106	7.26807e-18	8.53165e-17	AAEL002721				GO:0005634,GO:0005737,GO:0045892,GO:0046983	nucleus,cytoplasm,negative regulation of transcription, DNA-templated,protein dimerization activity
LOC5570597	527.167	1.54197	0.179157	8.60681	7.51202e-18	8.81092e-17	AAEL008412	Mitochondrial import inner membrane translocase subunit TIM44 [Source:UniProtKB/TrEMBL;Acc:Q16YW1]			GO:0005739,GO:0005743,GO:0015031,GO:0016020,GO:0030150,GO:0051087	mitochondrion,mitochondrial inner membrane,protein transport,membrane,protein import into mitochondrial matrix,chaperone binding
LOC5568068	612.187	2.01069	0.233622	8.60657	7.52813e-18	8.82272e-17	AAEL006523	crk [Source:VB Community Annotation]			GO:0005515	protein binding
LOC5563987	66.9609	-3.69971	0.430401	-8.59598	8.25599e-18	9.66799e-17	AAEL019872				GO:0003677,GO:0005634,GO:0006355,GO:0043565	DNA binding,nucleus,regulation of transcription, DNA-templated,sequence-specific DNA binding
LOC5570068	982.708	-1.43991	0.167561	-8.59333	8.44854e-18	9.88554e-17	AAEL001331	mannose-1-phosphate guanyltransferase [Source:VB Community Annotation]			GO:0009058,GO:0016740,GO:0016779	biosynthetic process,transferase activity,nucleotidyltransferase activity
LOC5567897	63.8357	3.19165	0.371514	8.59094	8.6264e-18	1.00856e-16	AAEL006350
LOC5568752	300.855	-2.95016	0.34345	-8.5898	8.7122e-18	1.01777e-16	AAEL007105				GO:0005515,GO:0051260	protein binding,protein homooligomerization
LOC110678396	288.344	1.50893	0.175816	8.58242	9.28989e-18	1.08439e-16	AAEL023464
LOC5568312	1143.57	2.05925	0.239949	8.58206	9.31887e-18	1.0869e-16	AAEL006752	Misexpression suppressor of ras, putative [Source:VB Community Annotation]
LOC5569893	925.765	-1.32945	0.15498	-8.57816	9.64026e-18	1.12349e-16	AAEL007996	centaurin alpha [Source:VB Community Annotation]			GO:0005096,GO:0043547,GO:0046872,GO:1902936	GTPase activator activity,positive regulation of GTPase activity,metal ion binding,phosphatidylinositol bisphosphate binding
LOC5563713	4429.98	-0.780881	0.0910353	-8.57779	9.67133e-18	1.12621e-16	AAEL003916	splicing factor, putative [Source:VB Community Annotation]			GO:0003676,GO:0003723	nucleic acid binding,RNA binding
LOC5563678	118.512	1.91614	0.223398	8.57722	9.71976e-18	1.13095e-16	AAEL020160
LOC5579869	197.014	-2.01587	0.235095	-8.57471	9.93377e-18	1.15493e-16	AAEL019436				GO:0005886,GO:0007608,GO:0016020,GO:0016021,GO:0050896	plasma membrane,sensory perception of smell,membrane,integral component of membrane,response to stimulus
LOC110677277	164.448	-1.73809	0.202828	-8.56927	1.04146e-17	1.20987e-16	AAEL020842
LOC5566111	365.43	1.7054	0.199032	8.56849	1.04846e-17	1.21704e-16	AAEL005204				GO:0016020,GO:0016021,GO:0022857,GO:0055085	membrane,integral component of membrane,transmembrane transporter activity,transmembrane transport
LOC5576021	561.417	2.06998	0.241602	8.56773	1.05546e-17	1.22417e-16	AAEL019755				GO:0005509,GO:0005515,GO:0006897,GO:0016020,GO:0016021	calcium ion binding,protein binding,endocytosis,membrane,integral component of membrane
LOC5574471	77.8082	-5.44527	0.635563	-8.56764	1.05629e-17	1.22417e-16	AAEL002367	Carboxy/choline esterase Alpha Esterase [Source:VB Community Annotation]	CCEAE1B		GO:0016787,GO:0052689	hydrolase activity,carboxylic ester hydrolase activity
LOC110674343	89.2705	-2.61904	0.305869	-8.56261	1.10337e-17	1.27772e-16	AAEL022520				GO:0006629,GO:0016788	lipid metabolic process,hydrolase activity, acting on ester bonds
LOC5576999	537.194	1.56126	0.182417	8.55874	1.1411e-17	1.32037e-16	AAEL003090	malate synthase [Source:VB Community Annotation]			GO:0003824,GO:0004474,GO:0006097,GO:0006099,GO:0016740	catalytic activity,malate synthase activity,glyoxylate cycle,tricarboxylic acid cycle,transferase activity
LOC5565885	1209.56	-0.986047	0.115219	-8.55804	1.14805e-17	1.32735e-16	AAEL000717	protocadherin [Source:VB Community Annotation]			GO:0005509,GO:0005886,GO:0007155,GO:0007156,GO:0016020	calcium ion binding,plasma membrane,cell adhesion,homophilic cell adhesion via plasma membrane adhesion molecules,membrane
LOC5569899	1066.67	0.981644	0.114706	8.55789	1.14948e-17	1.32795e-16	AAEL007990
LOC5565444	637.764	1.39559	0.163102	8.55652	1.16326e-17	1.34281e-16	AAEL023786
LOC5566125	383.115	-1.36146	0.159189	-8.5525	1.2045e-17	1.38932e-16	AAEL005203	Queuosine salvage protein [Source:UniProtKB/TrEMBL;Acc:A0A1S4F9V4]			GO:0006400	tRNA modification
LOC5579937	246.357	-2.85676	0.334071	-8.55137	1.21635e-17	1.40187e-16	AAEL006797	F-box/leucine rich repeat protein [Source:VB Community Annotation]			GO:0005515	protein binding
LOC5573800	1146.7	-1.83987	0.215202	-8.54953	1.23588e-17	1.42326e-16	AAEL019579				GO:0004252,GO:0006508,GO:0008233,GO:0008236,GO:0016020,GO:0016021,GO:0016787	serine-type endopeptidase activity,proteolysis,peptidase activity,serine-type peptidase activity,membrane,integral component of membrane,hydrolase activity
LOC5567545	446.86	2.48133	0.290426	8.54374	1.29944e-17	1.49528e-16	AAEL006123	trypsin, putative [Source:VB Community Annotation]			GO:0004252,GO:0006508	serine-type endopeptidase activity,proteolysis
LOC5566684	10299	-2.10468	0.246562	-8.53611	1.38822e-17	1.59618e-16	AAEL005567	nucleosome assembly protein [Source:VB Community Annotation]			GO:0005634,GO:0006334	nucleus,nucleosome assembly
LOC5575389	605.093	1.44183	0.168911	8.53601	1.38936e-17	1.59623e-16	AAEL011788				GO:0004519,GO:0005515,GO:0090305	endonuclease activity,protein binding,nucleic acid phosphodiester bond hydrolysis
LOC5578674	279.974	-2.52523	0.295956	-8.53247	1.43251e-17	1.64451e-16	AAEL003617	alcohol dehydrogenase [Source:VB Community Annotation]			GO:0005737,GO:0006693,GO:0016491,GO:0032440,GO:0036132,GO:0047522,GO:0055114	cytoplasm,prostaglandin metabolic process,oxidoreductase activity,2-alkenal reductase [NAD(P)+] activity,13-prostaglandin reductase activity,15-oxoprostaglandin 13-oxidase activity,oxidation-reduction process
LOC5572726	812.937	1.35673	0.159044	8.53058	1.45616e-17	1.67035e-16	AAEL010015				GO:0003677,GO:0005515	DNA binding,protein binding
LOC5573399	459.074	1.15007	0.134897	8.52552	1.52129e-17	1.74369e-16	AAEL024714				GO:0003676,GO:0005634,GO:0008270,GO:0046872	nucleic acid binding,nucleus,zinc ion binding,metal ion binding
LOC5578715	835.289	-1.05188	0.123465	-8.51961	1.60096e-17	1.83241e-16	AAEL013825	helicase [Source:VB Community Annotation]			GO:0000166,GO:0003676,GO:0003723,GO:0003724,GO:0004386,GO:0005524,GO:0006401,GO:0016787	nucleotide binding,nucleic acid binding,RNA binding,RNA helicase activity,helicase activity,ATP binding,RNA catabolic process,hydrolase activity
LOC5567679	1529.11	1.16811	0.137109	8.51959	1.6012e-17	1.83241e-16	AAEL006247				GO:0046872	metal ion binding
LOC110674129	205.688	-2.15435	0.252876	-8.51942	1.60359e-17	1.8337e-16	AAEL027387
LOC5576933	1303.57	1.81009	0.212557	8.51577	1.65482e-17	1.8908e-16	AAEL012876				GO:0046872	metal ion binding
LOC5579391	411.837	-1.22576	0.143955	-8.51483	1.66836e-17	1.90478e-16	AAEL015493				GO:0005737,GO:0005764,GO:0016020,GO:0016021,GO:0048471	cytoplasm,lysosome,membrane,integral component of membrane,perinuclear region of cytoplasm
LOC5565022	313.886	1.50656	0.176989	8.51215	1.70738e-17	1.9478e-16	AAEL014705				GO:0005515,GO:0016020,GO:0016021	protein binding,membrane,integral component of membrane
LOC5564512	1822.79	-0.943903	0.110902	-8.51117	1.72181e-17	1.96273e-16	AAEL020434
LOC5578948	827.69	1.73613	0.203994	8.51069	1.72907e-17	1.96947e-16	AAEL028110				GO:0003779,GO:0016043,GO:0017048,GO:0030036	actin binding,cellular component organization,Rho GTPase binding,actin cytoskeleton organization
LOC5569376	1013.18	2.37295	0.278838	8.51014	1.73718e-17	1.97716e-16	AAEL007562				GO:0005789,GO:0015031,GO:0016020,GO:0016021	endoplasmic reticulum membrane,protein transport,membrane,integral component of membrane
LOC5568468	1093.73	-1.03405	0.121537	-8.50812	1.76779e-17	2.01044e-16	AAEL006887	mRNA turnover protein 4 mrt4 [Source:VB Community Annotation]			GO:0000027,GO:0005634,GO:0005730,GO:0005737,GO:0042254	ribosomal large subunit assembly,nucleus,nucleolus,cytoplasm,ribosome biogenesis
LOC5568784	2005.24	-1.07622	0.126496	-8.5079	1.77108e-17	2.0126e-16	AAEL007135	peroxiredoxin 5, prdx5 [Source:VB Community Annotation]			GO:0004601,GO:0005623,GO:0005782,GO:0016209,GO:0016491,GO:0045454,GO:0051920,GO:0055114,GO:0098869	peroxidase activity,obsolete cell,peroxisomal matrix,antioxidant activity,oxidoreductase activity,cell redox homeostasis,peroxiredoxin activity,oxidation-reduction process,cellular oxidant detoxification
LOC5573269	618.157	1.21517	0.142982	8.49871	1.91709e-17	2.17683e-16	AAEL019544				GO:0003824	catalytic activity
LOC5571738	914.134	1.56257	0.183911	8.49635	1.95646e-17	2.2198e-16	AAEL009259
LOC5575441	605.34	1.39547	0.164335	8.4916	2.03804e-17	2.31057e-16	AAEL002636				GO:0016020,GO:0016021,GO:0016787	membrane,integral component of membrane,hydrolase activity
LOC5568689	198.846	1.9972	0.235397	8.48438	2.16869e-17	2.45679e-16	AAEL007053
LOC5578052	1675.4	2.05112	0.241783	8.48329	2.18917e-17	2.47805e-16	AAEL013487	RHO guanyl-nucleotide exchange factor, putative [Source:VB Community Annotation]			GO:0005085,GO:0005737	guanyl-nucleotide exchange factor activity,cytoplasm
LOC5575190	1143.42	-2.4785	0.292275	-8.48004	2.25122e-17	2.54512e-16	AAEL000336				GO:0005515	protein binding
LOC5571823	1252.76	-2.07681	0.244906	-8.48	2.2519e-17	2.54512e-16	AAEL001686
LOC5564312	339.084	1.56397	0.184488	8.47733	2.30415e-17	2.60216e-16	AAEL000593	mitochondrial 18 kda protein (mtp18) [Source:VB Community Annotation]
LOC5571783	5034.33	-1.55164	0.183142	-8.47236	2.40462e-17	2.71352e-16	AAEL009320	chaperonin [Source:VB Community Annotation]			GO:0000166,GO:0005524,GO:0005737,GO:0006457,GO:0051082	nucleotide binding,ATP binding,cytoplasm,protein folding,unfolded protein binding
LOC5577673	257.154	-2.66668	0.314804	-8.47093	2.43439e-17	2.74499e-16	AAEL013304				GO:0016020,GO:0016021	membrane,integral component of membrane
LOC5575645	290.019	1.51039	0.178358	8.46828	2.49033e-17	2.8059e-16	AAEL011979	calmodulin [Source:VB Community Annotation]
LOC5564091	3467.84	-1.09875	0.129785	-8.46589	2.5421e-17	2.86202e-16	AAEL028021
LOC5569128	3289.58	-0.85338	0.100833	-8.46327	2.5999e-17	2.92484e-16	AAEL024053				GO:0000166,GO:0004672,GO:0004674,GO:0004675,GO:0005524,GO:0006468,GO:0007178,GO:0016020,GO:0016021,GO:0016301,GO:0016310,GO:0016740,GO:0038023,GO:0043235,GO:0046872	nucleotide binding,protein kinase activity,protein serine/threonine kinase activity,transmembrane receptor protein serine/threonine kinase activity,ATP binding,protein phosphorylation,transmembrane receptor protein serine/threonine kinase signaling pathway,membrane,integral component of membrane,kinase activity,phosphorylation,transferase activity,signaling receptor activity,receptor complex,meta…
LOC5563659	3049.18	-1.06998	0.126492	-8.45883	2.70067e-17	3.03586e-16	AAEL000004	glycosyltransferase [Source:VB Community Annotation]			GO:0000026,GO:0000030,GO:0004376,GO:0005783,GO:0005789,GO:0006506,GO:0016020,GO:0016021,GO:0016740,GO:0016757,GO:0097502	alpha-1,2-mannosyltransferase activity,mannosyltransferase activity,glycolipid mannosyltransferase activity,endoplasmic reticulum,endoplasmic reticulum membrane,GPI anchor biosynthetic process,membrane,integral component of membrane,transferase activity,transferase activity, transferring glycosyl groups,mannosylation
LOC5567293	571.035	1.87424	0.221596	8.45792	2.72181e-17	3.05727e-16	AAEL005943	ser/thr kinase stk11 (lkb1) [Source:VB Community Annotation]			GO:0000166,GO:0001558,GO:0004672,GO:0004674,GO:0005524,GO:0005737,GO:0006468,GO:0016301,GO:0016310,GO:0016740,GO:0030010,GO:0030295,GO:0032147,GO:0042593,GO:0046872	nucleotide binding,regulation of cell growth,protein kinase activity,protein serine/threonine kinase activity,ATP binding,cytoplasm,protein phosphorylation,kinase activity,phosphorylation,transferase activity,establishment of cell polarity,protein kinase activator activity,activation of protein kinase activity,glucose homeostasis,metal ion binding
LOC5565067	447.737	1.19567	0.141369	8.45781	2.72451e-17	3.05794e-16	AAEL004570				GO:0005634,GO:0008270,GO:0046872	nucleus,zinc ion binding,metal ion binding
LOC5566265	251.456	-2.03119	0.240333	-8.45158	2.87393e-17	3.22317e-16	AAEL023348				GO:0003677,GO:0003700,GO:0005634,GO:0006355,GO:0043565	DNA binding,DNA-binding transcription factor activity,nucleus,regulation of transcription, DNA-templated,sequence-specific DNA binding
LOC5566608	796.45	0.92943	0.109974	8.45133	2.87991e-17	3.2274e-16	AAEL000791				GO:0005739	mitochondrion
LOC5574326	728.893	1.37708	0.162961	8.45033	2.90488e-17	3.25288e-16	AAEL018057				GO:0004672,GO:0005524,GO:0006468	protein kinase activity,ATP binding,protein phosphorylation
LOC5564777	330.621	1.32885	0.157296	8.44812	2.96036e-17	3.31247e-16	AAEL004422				GO:0005737,GO:0008168,GO:0008988,GO:0016740,GO:0031167,GO:0032259	cytoplasm,methyltransferase activity,rRNA (adenine-N6-)-methyltransferase activity,transferase activity,rRNA methylation,methylation
LOC5566549	150.395	-1.84597	0.218594	-8.44474	3.04722e-17	3.40705e-16	AAEL005464
LOC5564029	427.216	1.43525	0.169997	8.44278	3.09878e-17	3.46204e-16	AAEL014289				GO:0003676,GO:0005634,GO:0008270,GO:0046872	nucleic acid binding,nucleus,zinc ion binding,metal ion binding
LOC5570149	2002.84	-2.60028	0.308351	-8.43286	3.37327e-17	3.76583e-16	AAEL008132	CRAL/TRIO domain-containing protein [Source:VB Community Annotation]
LOC110677751	109.291	2.98771	0.354531	8.42722	3.53974e-17	3.94865e-16	AAEL023177
LOC5570506	1081.55	-1.16919	0.138764	-8.42578	3.5836e-17	3.99452e-16	AAEL001407	cdk4/6 [Source:VB Community Annotation]			GO:0000166,GO:0004672,GO:0004674,GO:0005524,GO:0006468	nucleotide binding,protein kinase activity,protein serine/threonine kinase activity,ATP binding,protein phosphorylation
LOC5565320	515.426	1.44504	0.171522	8.42481	3.61331e-17	4.02457e-16	AAEL004713				GO:0005515,GO:0008270,GO:0046872	protein binding,zinc ion binding,metal ion binding
LOC5574538	431.568	1.60799	0.190872	8.42443	3.62519e-17	4.03472e-16	AAEL011217				GO:0016020,GO:0016021	membrane,integral component of membrane
LOC5566352	1574.98	-1.4869	0.176517	-8.42352	3.65332e-17	4.06293e-16	AAEL028119				GO:0016020	membrane
LOC5574453	284.091	2.5337	0.300914	8.42	3.76469e-17	4.18359e-16	AAEL011172				GO:0016787	hydrolase activity
LOC5563646	26067.1	0.841918	0.100017	8.41778	3.83688e-17	4.26057e-16	AAEL021083	40S ribosomal protein S25 [Source:UniProtKB/TrEMBL;Acc:Q1HRL9]	RpS25		GO:0005840	ribosome
LOC5577953	161.091	-2.28312	0.271286	-8.41592	3.89807e-17	4.32523e-16	AAEL013434	spaetzle-like cytokine [Source:VB Community Annotation]
LOC5574692	1314.13	-1.0433	0.12398	-8.41504	3.92763e-17	4.35472e-16	AAEL011329				GO:0006974,GO:0008283	cellular response to DNA damage stimulus,cell population proliferation
LOC110676632	144.446	-2.06462	0.245367	-8.41439	3.94945e-17	4.37558e-16	AAEL026312
LOC5565409	10781.6	-2.3069	0.274206	-8.41304	3.99526e-17	4.42298e-16	AAEL014847	Innexin [Source:UniProtKB/TrEMBL;Acc:Q16FA2]	inx2		GO:0005886,GO:0005921,GO:0006811,GO:0016020,GO:0016021,GO:0030054	plasma membrane,gap junction,ion transport,membrane,integral component of membrane,cell junction
LOC5570124	232.546	-2.33661	0.277783	-8.41164	4.04305e-17	4.47249e-16	AAEL011818
LOC5576136	404.18	2.02327	0.240539	8.4114	4.05162e-17	4.47857e-16	AAEL024236				GO:0003677,GO:0003700,GO:0006355	DNA binding,DNA-binding transcription factor activity,regulation of transcription, DNA-templated
LOC5575360	341.245	1.4222	0.169127	8.40902	4.13452e-17	4.56675e-16	AAEL011765				GO:0005737,GO:0005794	cytoplasm,Golgi apparatus
LOC5564984	592.646	1.56494	0.186115	8.4085	4.15291e-17	4.5836e-16	AAEL019853				GO:0004252,GO:0006508	serine-type endopeptidase activity,proteolysis
LOC5573654	1699.02	-0.936626	0.111398	-8.40791	4.17385e-17	4.60323e-16	AAEL010640	phosphoribosylamine-glycine ligase [Source:VB Community Annotation]			GO:0000166,GO:0003824,GO:0004637,GO:0004641,GO:0004644,GO:0005524,GO:0006164,GO:0006189,GO:0008152,GO:0009058,GO:0009113,GO:0016742,GO:0016874,GO:0046872	nucleotide binding,catalytic activity,phosphoribosylamine-glycine ligase activity,phosphoribosylformylglycinamidine cyclo-ligase activity,phosphoribosylglycinamide formyltransferase activity,ATP binding,purine nucleotide biosynthetic process,'de novo' IMP biosynthetic process,metabolic process,biosynthetic process,purine nucleobase biosynthetic process,hydroxymethyl-, formyl- and related transfer…
LOC5568035	2124.09	-2.69284	0.320421	-8.40408	4.31232e-17	4.75235e-16	AAEL006476	symbol, putative [Source:VB Community Annotation]			GO:0003676	nucleic acid binding
LOC110675900	57.9928	3.15777	0.375775	8.40337	4.33833e-17	4.7774e-16	AAEL021856
LOC110679098	4341.85	-1.11188	0.132319	-8.40308	4.34932e-17	4.78589e-16	AAEL024343				GO:0003676,GO:0003723,GO:0005634,GO:0006397,GO:0008380	nucleic acid binding,RNA binding,nucleus,mRNA processing,RNA splicing
LOC5577636	1583.11	-1.51104	0.179944	-8.39732	4.56765e-17	5.02235e-16	AAEL025295
LOC5571253	789.15	-1.8221	0.216993	-8.39704	4.5789e-17	5.03093e-16	AAEL001566	bone morphogenetic protein [Source:VB Community Annotation]			GO:0004222,GO:0005509,GO:0006508,GO:0008233,GO:0008237,GO:0008270,GO:0016787,GO:0046872	metalloendopeptidase activity,calcium ion binding,proteolysis,peptidase activity,metallopeptidase activity,zinc ion binding,hydrolase activity,metal ion binding
LOC5573339	1462.17	1.48704	0.1773	8.38712	4.98187e-17	5.46956e-16	AAEL010437	Heparan n-sulfatase [Source:UniProtKB/TrEMBL;Acc:A0A1S4FQA7]			GO:0003824,GO:0008484,GO:0016787	catalytic activity,sulfuric ester hydrolase activity,hydrolase activity
LOC5578735	532.808	1.70634	0.203455	8.38684	4.99396e-17	5.47872e-16	AAEL003647	GPCR Neurokinin/Tachykinin Family [Source:VB Community Annotation]	GPRNPR3		GO:0004930,GO:0004983,GO:0007165,GO:0007186,GO:0007218,GO:0016020,GO:0016021	G protein-coupled receptor activity,neuropeptide Y receptor activity,signal transduction,G protein-coupled receptor signaling pathway,neuropeptide signaling pathway,membrane,integral component of membrane
LOC5570428	97.0567	3.62251	0.43223	8.38097	5.24923e-17	5.75444e-16	AAEL008331
LOC5571279	679.167	-1.69772	0.202609	-8.3793	5.3244e-17	5.83245e-16	AAEL001565	peptidyl-glycine alpha-amidating monooxygenase [Source:VB Community Annotation]			GO:0003824,GO:0004598,GO:0005515,GO:0006518,GO:0016020,GO:0016021,GO:0016829,GO:0046872	catalytic activity,peptidylamidoglycolate lyase activity,protein binding,peptide metabolic process,membrane,integral component of membrane,lyase activity,metal ion binding
LOC5577095	684.26	1.62801	0.194303	8.37869	5.35187e-17	5.85815e-16	AAEL012994	Glucose-6-phosphate isomerase [Source:UniProtKB/TrEMBL;Acc:Q16KI0]			GO:0004347,GO:0006094,GO:0006096,GO:0016853	glucose-6-phosphate isomerase activity,gluconeogenesis,glycolytic process,isomerase activity
LOC5574166	1366.7	-1.22293	0.146021	-8.37502	5.52147e-17	6.03926e-16	AAEL019623				GO:0007165	signal transduction
LOC5573407	2640.72	-1.01876	0.121705	-8.37076	5.725e-17	6.25718e-16	AAEL002077	UV excision repair protein rad23 [Source:VB Community Annotation]			GO:0003684,GO:0005515,GO:0005634,GO:0005654,GO:0005737,GO:0005829,GO:0006281,GO:0006289,GO:0006974,GO:0031593,GO:0042025,GO:0043130,GO:0043161	damaged DNA binding,protein binding,nucleus,nucleoplasm,cytoplasm,cytosol,DNA repair,nucleotide-excision repair,cellular response to DNA damage stimulus,polyubiquitin modification-dependent protein binding,host cell nucleus,ubiquitin binding,proteasome-mediated ubiquitin-dependent protein catabolic process
LOC5564381	149.889	-2.52969	0.302352	-8.36669	5.92587e-17	6.47189e-16	AAEL014412	cytochrome P450 [Source:VB Community Annotation]	CYP304B2		GO:0004497,GO:0005506,GO:0016020,GO:0016021,GO:0016491,GO:0016705,GO:0020037,GO:0046872,GO:0055114	monooxygenase activity,iron ion binding,membrane,integral component of membrane,oxidoreductase activity,oxidoreductase activity, acting on paired donors, with incorporation or reduction of molecular oxygen,heme binding,metal ion binding,oxidation-reduction process
LOC5565805	6908.42	-1.06571	0.1274	-8.36509	6.0067e-17	6.55525e-16	AAEL019932				GO:0005515,GO:0005634,GO:0006355	protein binding,nucleus,regulation of transcription, DNA-templated
LOC5565635	2808.62	-1.23405	0.147533	-8.36457	6.03349e-17	6.57957e-16	AAEL028015				GO:0003839,GO:0006751	gamma-glutamylcyclotransferase activity,glutathione catabolic process
LOC5564492	887.618	1.26291	0.150998	8.36377	6.07472e-17	6.61814e-16	AAEL004294	dihydrolipoamide acetyltransferase component of pyruvate dehydrogenase [Source:VB Community Annotation]			GO:0004742,GO:0006090,GO:0016746,GO:0030523,GO:0045254	dihydrolipoyllysine-residue acetyltransferase activity,pyruvate metabolic process,transferase activity, transferring acyl groups,dihydrolipoamide S-acyltransferase activity,pyruvate dehydrogenase complex
LOC5570913	14331.6	-1.3664	0.163372	-8.3637	6.07793e-17	6.61814e-16	AAEL001484	chromosome region maintenance protein 1/exportin [Source:VB Community Annotation]			GO:0005049,GO:0005634,GO:0006886,GO:0008536,GO:0015031,GO:0051168	nuclear export signal receptor activity,nucleus,intracellular protein transport,Ran GTPase binding,protein transport,nuclear export
LOC5570290	460.956	-1.87845	0.224608	-8.36322	6.10279e-17	6.64025e-16	AAEL024936				GO:0005515,GO:0032502	protein binding,developmental process
LOC5576987	856.203	1.27468	0.15247	8.36021	6.26068e-17	6.80698e-16	AAEL003065				GO:0046872	metal ion binding
LOC5575573	386.914	-1.90744	0.228168	-8.35979	6.28293e-17	6.82607e-16	AAEL002678	ras suppressor protein 1, rsu1 [Source:VB Community Annotation]			GO:0005515	protein binding
LOC5566787	635.606	1.7176	0.205534	8.35678	6.4453e-17	6.99727e-16	AAEL019539				GO:0016020,GO:0016021,GO:0016409,GO:0016740,GO:0016746,GO:0019706	membrane,integral component of membrane,palmitoyltransferase activity,transferase activity,transferase activity, transferring acyl groups,protein-cysteine S-palmitoyltransferase activity
LOC5568448	398.727	2.01694	0.241378	8.3559	6.49342e-17	7.04281e-16	AAEL006865				GO:0005515,GO:0031929,GO:0031931	protein binding,TOR signaling,TORC1 complex
LOC110681459	304.937	1.79885	0.21528	8.35584	6.4969e-17	7.04281e-16	AAEL024885
LOC5572266	633.467	1.14626	0.137186	8.35546	6.51766e-17	7.06007e-16	AAEL001761	exonuclease [Source:VB Community Annotation]			GO:0003676,GO:0006364,GO:0008408,GO:0090305	nucleic acid binding,rRNA processing,3'-5' exonuclease activity,nucleic acid phosphodiester bond hydrolysis
LOC5565876	817.063	1.21191	0.145125	8.3508	6.78043e-17	7.33764e-16	AAEL015014				GO:0016020,GO:0016021	membrane,integral component of membrane
LOC5578355	346.56	-1.7216	0.206161	-8.35073	6.78396e-17	7.33764e-16	AAEL003543
LOC5570443	1339.5	-2.60676	0.312332	-8.34612	7.05451e-17	7.62462e-16	AAEL008336	snail protein, putative [Source:VB Community Annotation]			GO:0003676	nucleic acid binding
LOC110676327	893.651	1.51308	0.181309	8.34529	7.10364e-17	7.67203e-16	AAEL027034				GO:0005347,GO:0055085	ATP transmembrane transporter activity,transmembrane transport
LOC5570577	345.001	1.58944	0.190525	8.34243	7.27798e-17	7.85451e-16	AAEL008392				GO:0003690,GO:0006355	double-stranded DNA binding,regulation of transcription, DNA-templated
LOC5566116	777.577	1.16972	0.140286	8.33812	7.5481e-17	8.14001e-16	AAEL005174
LOC5568888	1056.62	1.58413	0.190002	8.33746	7.59056e-17	8.17976e-16	AAEL007196
LOC5577739	2030.21	-1.39016	0.166808	-8.33392	7.82103e-17	8.4219e-16	AAEL019455				GO:0000166,GO:0003924,GO:0005525,GO:0007165,GO:0016020,GO:0032486	nucleotide binding,GTPase activity,GTP binding,signal transduction,membrane,Rap protein signal transduction
LOC5577612	226.165	1.48541	0.178262	8.33276	7.89783e-17	8.49833e-16	AAEL026088				GO:0000166,GO:0005524	nucleotide binding,ATP binding
LOC5578529	125.163	2.97537	0.357082	8.33245	7.91834e-17	8.51411e-16	AAEL024782
LOC5570704	5529.2	-2.32167	0.27864	-8.33212	7.9405e-17	8.53165e-16	AAEL022657				GO:0016747	transferase activity, transferring acyl groups other than amino-acyl groups
LOC5576239	2631.48	-1.77295	0.212859	-8.32921	8.13816e-17	8.73759e-16	AAEL002850	patched 1, [Source:VB Community Annotation]			GO:0016020,GO:0016021	membrane,integral component of membrane
LOC5572566	3198.52	-2.39792	0.288175	-8.32105	8.71874e-17	9.35405e-16	AAEL009888	sodium-coupled cation-chloride cotransporter [Source:VB Community Annotation]	CCC2		GO:0006811,GO:0015293,GO:0015377,GO:0016020,GO:0016021,GO:0022857,GO:0055085,GO:1902476	ion transport,symporter activity,cation:chloride symporter activity,membrane,integral component of membrane,transmembrane transporter activity,transmembrane transport,chloride transmembrane transport
LOC5567069	600.619	1.26435	0.151988	8.31879	8.8867e-17	9.52725e-16	AAEL005811				GO:0016020,GO:0016021	membrane,integral component of membrane
LOC5564040	567.932	-1.22862	0.147797	-8.31292	9.33761e-17	1.00033e-15	AAEL004050	diphosphomevalonate decarboxylase [Source:VB Community Annotation]			GO:0000166,GO:0004163,GO:0005524,GO:0005829,GO:0006629,GO:0006694,GO:0006695,GO:0008202,GO:0008203,GO:0008299,GO:0016126,GO:0016829,GO:0016831,GO:0019287	nucleotide binding,diphosphomevalonate decarboxylase activity,ATP binding,cytosol,lipid metabolic process,steroid biosynthetic process,cholesterol biosynthetic process,steroid metabolic process,cholesterol metabolic process,isoprenoid biosynthetic process,sterol biosynthetic process,lyase activity,carboxy-lyase activity,isopentenyl diphosphate biosynthetic process, mevalonate pathway
LOC5573854	5929.71	-1.12919	0.135882	-8.31006	9.56525e-17	1.02397e-15	AAEL010781	ap endonuclease [Source:VB Community Annotation]			GO:0003677,GO:0004518,GO:0004519,GO:0006281,GO:0006974,GO:0016787,GO:0046872,GO:0090305,GO:0140078	DNA binding,nuclease activity,endonuclease activity,DNA repair,cellular response to DNA damage stimulus,hydrolase activity,metal ion binding,nucleic acid phosphodiester bond hydrolysis,class I DNA-(apurinic or apyrimidinic site) endonuclease activity
LOC5571723	973.876	1.85526	0.22328	8.30912	9.64171e-17	1.03139e-15	AAEL020359				GO:0003676,GO:0003723	nucleic acid binding,RNA binding
LOC5577774	457.655	-1.64605	0.198138	-8.3076	9.76608e-17	1.04393e-15	AAEL003321				GO:0005515	protein binding
LOC5576325	146.786	-2.08526	0.251091	-8.30481	9.99787e-17	1.06793e-15	AAEL027096				GO:0003700,GO:0006355	DNA-binding transcription factor activity,regulation of transcription, DNA-templated
LOC5564210	1012.94	-0.991256	0.119373	-8.30387	1.00775e-16	1.07565e-15	AAEL021625				GO:0046872	metal ion binding
LOC5567473	1213.44	-2.21459	0.266786	-8.30099	1.03251e-16	1.10127e-15	AAEL000931	Alkaline phosphatase [Source:UniProtKB/TrEMBL;Acc:Q1HQK7]			GO:0003824,GO:0004035,GO:0016311,GO:0016787,GO:0016791,GO:0031225	catalytic activity,alkaline phosphatase activity,dephosphorylation,hydrolase activity,phosphatase activity,anchored component of membrane
LOC5570014	1568.07	1.2328	0.14855	8.29889	1.05088e-16	1.12004e-15	AAEL000179	ubiquitin-conjugating enzyme E2 l [Source:VB Community Annotation]			GO:0000166,GO:0005524,GO:0016740	nucleotide binding,ATP binding,transferase activity
LOC110681004	51.2252	-4.27384	0.515073	-8.29754	1.06289e-16	1.13201e-15	AAEL022969
LOC110675184	1647.47	-1.88689	0.22743	-8.29656	1.07172e-16	1.14059e-15	AAEL021132				GO:0015267,GO:0016020,GO:0055085	channel activity,membrane,transmembrane transport
LOC5579472	5869.19	-1.02991	0.124155	-8.29537	1.08249e-16	1.15122e-15	AAEL007650	Chaperonin [Source:UniProtKB/TrEMBL;Acc:A0A1S4FHA0]			GO:0000166,GO:0005524,GO:0005737,GO:0005829,GO:0005832,GO:0006457,GO:0051082	nucleotide binding,ATP binding,cytoplasm,cytosol,chaperonin-containing T-complex,protein folding,unfolded protein binding
LOC5563635	802.065	1.36724	0.164875	8.29258	1.10817e-16	1.17766e-15	AAEL021256
LOC5574115	399.862	2.21852	0.267545	8.29215	1.11219e-16	1.18089e-15	AAEL002253	beta-1,3-n-acetylglucosaminyltransferase radical fringe (o-fucosylpeptide 3-beta-n-acetylglucosaminyltransferase) [Source:VB Community Annotation]			GO:0016020,GO:0016021,GO:0016757	membrane,integral component of membrane,transferase activity, transferring glycosyl groups
LOC5574677	1318.46	-1.19609	0.144245	-8.29208	1.11283e-16	1.18089e-15	AAEL011319
LOC5577322	2496.48	-1.04955	0.126588	-8.29102	1.12284e-16	1.19066e-15	AAEL000444	udp-glucose glycoprotein:glucosyltransferase [Source:VB Community Annotation]			GO:0003980,GO:0005783,GO:0005788,GO:0006486,GO:0016740,GO:0097359	UDP-glucose:glycoprotein glucosyltransferase activity,endoplasmic reticulum,endoplasmic reticulum lumen,protein glycosylation,transferase activity,UDP-glucosylation
LOC5578730	587.108	0.996804	0.120247	8.28962	1.13614e-16	1.20388e-15	AAEL013839
LOC5567716	541.772	1.39702	0.168653	8.28337	1.19741e-16	1.26788e-15	AAEL006298				GO:0005634,GO:0008285	nucleus,negative regulation of cell population proliferation
LOC110677652	163.404	1.69585	0.204738	8.28305	1.20062e-16	1.27036e-15	AAEL024341
LOC5574919	162.813	2.41361	0.291484	8.28042	1.22739e-16	1.29775e-15	AAEL011521	GPCR Methuselah Family [Source:VB Community Annotation]	GPRMTH6		GO:0004888,GO:0004930,GO:0007166,GO:0007186,GO:0016021	transmembrane signaling receptor activity,G protein-coupled receptor activity,cell surface receptor signaling pathway,G protein-coupled receptor signaling pathway,integral component of membrane
LOC5575168	674.906	-2.70235	0.326434	-8.2784	1.24845e-16	1.31906e-15	AAEL000324	tyrosine-protein kinase drl [Source:VB Community Annotation]			GO:0004672,GO:0005524,GO:0006468,GO:0016020,GO:0016021,GO:0016301,GO:0016310	protein kinase activity,ATP binding,protein phosphorylation,membrane,integral component of membrane,kinase activity,phosphorylation
LOC5565144	2201.24	-0.938192	0.113378	-8.27492	1.28542e-16	1.35713e-15	AAEL004634	condensin [Source:VB Community Annotation]			GO:0000278,GO:0005634,GO:0005694,GO:0007049,GO:0007076,GO:0030261,GO:0051301	mitotic cell cycle,nucleus,chromosome,cell cycle,mitotic chromosome condensation,chromosome condensation,cell division
LOC110678283	1143.25	-1.53737	0.185825	-8.27319	1.30419e-16	1.37595e-15	AAEL021167
LOC5571197	1263.53	-1.00044	0.121005	-8.26774	1.36525e-16	1.43933e-15	AAEL008886				GO:0003677,GO:0005634,GO:0046872	DNA binding,nucleus,metal ion binding
LOC5577357	3531.8	-2.39896	0.290372	-8.26166	1.43664e-16	1.5135e-15	AAEL000471	Monocarboxylate transporter [Source:UniProtKB/TrEMBL;Acc:A0A1S4EVY2]			GO:0016020,GO:0016021,GO:0022857,GO:0055085	membrane,integral component of membrane,transmembrane transporter activity,transmembrane transport
LOC110676030	829.746	-0.988291	0.119632	-8.2611	1.44332e-16	1.51944e-15	AAEL024500				GO:0000139,GO:0005198,GO:0005515,GO:0005737,GO:0005794,GO:0006890,GO:0015031,GO:0016020,GO:0016192,GO:0031410	Golgi membrane,structural molecule activity,protein binding,cytoplasm,Golgi apparatus,retrograde vesicle-mediated transport, Golgi to endoplasmic reticulum,protein transport,membrane,vesicle-mediated transport,cytoplasmic vesicle
LOC5566706	490.532	1.31773	0.159513	8.26098	1.44475e-16	1.51986e-15	AAEL005585				GO:0003676	nucleic acid binding
LOC5563563	329.134	1.20661	0.146102	8.25868	1.4729e-16	1.54835e-15	AAEL000026	dynein light chain, putative [Source:VB Community Annotation]
LOC5574223	370.994	2.61973	0.317387	8.25404	1.53122e-16	1.60848e-15	AAEL012382				GO:0000166,GO:0009166,GO:0016787,GO:0016788,GO:0046872	nucleotide binding,nucleotide catabolic process,hydrolase activity,hydrolase activity, acting on ester bonds,metal ion binding
LOC5573223	91.2062	-3.07314	0.372323	-8.25396	1.53231e-16	1.60848e-15	AAEL024127
LOC5570034	988.134	-2.16282	0.26207	-8.25282	1.54706e-16	1.6228e-15	AAEL018036
LOC110675128	4628.83	1.42613	0.172864	8.25003	1.58352e-16	1.65985e-15	AAEL026302
LOC5569391	811.788	-0.918916	0.111386	-8.24981	1.58641e-16	1.66169e-15	AAEL007573				GO:0005515	protein binding
LOC5576360	395.829	1.14968	0.139387	8.24809	1.60944e-16	1.6846e-15	AAEL002860	Mitochondrial pyruvate carrier [Source:UniProtKB/TrEMBL;Acc:Q17GV8]			GO:0005739,GO:0005743,GO:0006850,GO:0016020,GO:0016021	mitochondrion,mitochondrial inner membrane,mitochondrial pyruvate transmembrane transport,membrane,integral component of membrane
LOC5565476	903.151	1.9017	0.230662	8.24453	1.65811e-16	1.7343e-15	AAEL004799				GO:0003676	nucleic acid binding
LOC5579340	198.994	1.67211	0.202852	8.24303	1.67906e-16	1.75496e-15	AAEL015557	alpha methylacyl-coa racemase [Source:VB Community Annotation]			GO:0003824,GO:0008410,GO:0042754,GO:0045892	catalytic activity,CoA-transferase activity,negative regulation of circadian rhythm,negative regulation of transcription, DNA-templated
LOC5570502	869.483	-1.37872	0.167333	-8.23936	1.7314e-16	1.80837e-15	AAEL001403				GO:0030431,GO:0032222,GO:1903818	sleep,regulation of synaptic transmission, cholinergic,positive regulation of voltage-gated potassium channel activity
LOC5571194	96	7.0369	0.854454	8.23555	1.78735e-16	1.86547e-15	AAEL008884
LOC110676724	856.82	1.16851	0.141909	8.23419	1.80778e-16	1.88544e-15	AAEL027808				GO:0046872	metal ion binding
LOC5571398	592.093	-1.29253	0.156978	-8.23379	1.81381e-16	1.89038e-15	AAEL009039				GO:0006886,GO:0015031,GO:0016020,GO:0016192,GO:0030117,GO:0030123,GO:0030665	intracellular protein transport,protein transport,membrane,vesicle-mediated transport,membrane coat,AP-3 adaptor complex,clathrin-coated vesicle membrane
LOC110674236	74.1217	-3.08431	0.37465	-8.23251	1.83336e-16	1.90939e-15	AAEL026186
LOC5565869	1761.07	-0.953058	0.1158	-8.23018	1.86938e-16	1.94552e-15	AAEL015007	Proteasome subunit alpha type [Source:UniProtKB/TrEMBL;Acc:Q16EV7]			GO:0000502,GO:0004175,GO:0004298,GO:0005634,GO:0005737,GO:0005839,GO:0006508,GO:0006511,GO:0008233,GO:0016787,GO:0019773,GO:0051603	proteasome complex,endopeptidase activity,threonine-type endopeptidase activity,nucleus,cytoplasm,proteasome core complex,proteolysis,ubiquitin-dependent protein catabolic process,peptidase activity,hydrolase activity,proteasome core complex, alpha-subunit complex,proteolysis involved in cellular protein catabolic process
LOC5570796	1011.98	1.39149	0.169092	8.2292	1.88461e-16	1.95997e-15	AAEL023508				GO:0016020,GO:0016021	membrane,integral component of membrane
LOC5569015	1793.81	-1.95171	0.237173	-8.22907	1.88673e-16	1.96078e-15	AAEL007293	cAMP-dependent protein kinase catalytic subunit [Source:VB Community Annotation]			GO:0000166,GO:0004672,GO:0004674,GO:0004679,GO:0004691,GO:0005524,GO:0006468,GO:0007186,GO:0016301,GO:0016310,GO:0016740,GO:0034237	nucleotide binding,protein kinase activity,protein serine/threonine kinase activity,AMP-activated protein kinase activity,cAMP-dependent protein kinase activity,ATP binding,protein phosphorylation,G protein-coupled receptor signaling pathway,kinase activity,phosphorylation,transferase activity,protein kinase A regulatory subunit binding
LOC5567823	1643.86	-0.948307	0.11529	-8.22537	1.94583e-16	2.02075e-15	AAEL000981				GO:0005634	nucleus
LOC5576409	177.411	2.63603	0.32052	8.22422	1.96458e-16	2.03877e-15	AAEL023114
LOC5565278	875.406	1.6173	0.196694	8.22241	1.99455e-16	2.06841e-15	AAEL023512
LOC5563841	12239.9	-1.87604	0.228166	-8.22225	1.99717e-16	2.06965e-15	AAEL014171
LOC5572184	509.09	1.55794	0.189551	8.21914	2.04971e-16	2.12259e-15	AAEL019431	ecdysone receptor [Source:VB Community Annotation]	EcR		GO:0003677,GO:0003700,GO:0003707,GO:0004879,GO:0005634,GO:0006355,GO:0008270,GO:0035076,GO:0035100,GO:0042025,GO:0043565,GO:0046872	DNA binding,DNA-binding transcription factor activity,steroid hormone receptor activity,nuclear receptor activity,nucleus,regulation of transcription, DNA-templated,zinc ion binding,ecdysone receptor-mediated signaling pathway,ecdysone binding,host cell nucleus,sequence-specific DNA binding,metal ion binding
LOC5579467	64538.5	-0.74089	0.0901738	-8.21624	2.09982e-16	2.17294e-15	AAEL023603				GO:0000786,GO:0003677,GO:0005634,GO:0005694,GO:0046982	nucleosome,DNA binding,nucleus,chromosome,protein heterodimerization activity
LOC110678190	109.997	3.44882	0.419834	8.21471	2.12674e-16	2.19924e-15	AAEL023588				GO:0005515	protein binding
LOC5573886	185.426	2.40356	0.292603	8.21442	2.13189e-16	2.203e-15	AAEL010804	calcium/calmodulin-dependent protein kinase kinase [Source:VB Community Annotation]			GO:0000166,GO:0004672,GO:0005524,GO:0006468	nucleotide binding,protein kinase activity,ATP binding,protein phosphorylation
casRx	1233.45	11.1284	1.35497	8.21306	2.15619e-16	2.22654e-15
LOC5572063	2529.88	1.67344	0.203787	8.2117	2.18086e-16	2.25042e-15	AAEL019616				GO:0000166,GO:0004672,GO:0004712,GO:0005524,GO:0006468,GO:0016301,GO:0016310,GO:0016740	nucleotide binding,protein kinase activity,protein serine/threonine/tyrosine kinase activity,ATP binding,protein phosphorylation,kinase activity,phosphorylation,transferase activity
LOC5567173	2505.78	1.3483	0.16422	8.21033	2.20589e-16	2.27464e-15	AAEL019532				GO:0005515,GO:0005516,GO:0016020	protein binding,calmodulin binding,membrane
LOC5572528	1067.58	1.25115	0.152418	8.2087	2.23599e-16	2.30405e-15	AAEL009857				GO:0008289,GO:0016020,GO:0016021,GO:0031902	lipid binding,membrane,integral component of membrane,late endosome membrane
LOC5563815	507.704	1.46886	0.178957	8.20791	2.2508e-16	2.31768e-15	AAEL014146				GO:0005515	protein binding
LOC5573249	15812.3	-0.785845	0.0957449	-8.20769	2.25477e-16	2.32012e-15	AAEL010340	serine/arginine rich splicing factor [Source:VB Community Annotation]			GO:0000381,GO:0003676,GO:0003723,GO:0005634,GO:0043484	regulation of alternative mRNA splicing, via spliceosome,nucleic acid binding,RNA binding,nucleus,regulation of RNA splicing
LOC5564708	609.773	-1.09521	0.133502	-8.20372	2.33061e-16	2.39647e-15	AAEL023117				GO:0008270	zinc ion binding
LOC110679163	1018.16	1.1548	0.140782	8.20273	2.34991e-16	2.41461e-15	AAEL000427				GO:0016020,GO:0016021,GO:0016746	membrane,integral component of membrane,transferase activity, transferring acyl groups
LOC5569115	62.7211	-3.70348	0.451789	-8.19738	2.45686e-16	2.52273e-15	AAEL007373	ammonium transporter [Source:VB Community Annotation]			GO:0008519,GO:0015696,GO:0016020,GO:0016021,GO:0072488	ammonium transmembrane transporter activity,ammonium transport,membrane,integral component of membrane,ammonium transmembrane transport
LOC110681130	295.048	2.04019	0.248949	8.19521	2.5015e-16	2.56676e-15	AAEL020987				GO:0003993,GO:0004725,GO:0004726,GO:0005737,GO:0006470,GO:0016787,GO:0035335	acid phosphatase activity,protein tyrosine phosphatase activity,non-membrane spanning protein tyrosine phosphatase activity,cytoplasm,protein dephosphorylation,hydrolase activity,peptidyl-tyrosine dephosphorylation
LOC5569073	681.381	-1.16042	0.141631	-8.19326	2.54245e-16	2.60695e-15	AAEL001201
LOC110678669	248.845	-3.04386	0.371831	-8.18613	2.69771e-16	2.7642e-15	AAEL020256
LOC5573581	801.241	-1.49515	0.182668	-8.18508	2.72126e-16	2.78638e-15	AAEL002107	sulfide quinone reductase [Source:VB Community Annotation]			GO:0016491,GO:0055114	oxidoreductase activity,oxidation-reduction process
LOC110681310	50.1933	2.9706	0.363094	8.18136	2.80657e-16	2.87171e-15	AAEL023742				GO:0016021,GO:0051180,GO:0090482	integral component of membrane,vitamin transport,vitamin transmembrane transporter activity
LOC110679115	128.956	-2.01786	0.246655	-8.18088	2.81771e-16	2.8811e-15	AAEL024567
LOC5566154	1435.85	-1.25319	0.153202	-8.17999	2.83871e-16	2.90053e-15	AAEL005234
LOC5569135	905.533	1.63011	0.199422	8.17418	2.97877e-16	3.04151e-15	AAEL007397	Ecdysone-induced protein 75B isoform A Nuclear receptor [Source:VB Community Annotation]	E75		GO:0003677,GO:0003700,GO:0003707,GO:0004879,GO:0005634,GO:0006355,GO:0008270,GO:0030522,GO:0042025,GO:0043565,GO:0046872	DNA binding,DNA-binding transcription factor activity,steroid hormone receptor activity,nuclear receptor activity,nucleus,regulation of transcription, DNA-templated,zinc ion binding,intracellular receptor signaling pathway,host cell nucleus,sequence-specific DNA binding,metal ion binding
LOC5571891	511.506	1.48455	0.18167	8.17166	3.04166e-16	3.10355e-15	AAEL009375	plekhh1 [Source:VB Community Annotation]			GO:0005856	cytoskeleton
LOC5578955	599.737	1.12979	0.138398	8.1633	3.2598e-16	3.32381e-15	AAEL013936	Serine Protease Inhibitor (serpin) likely cleavage at I/S. Transcript A. [Source:VB Community Annotation]	SRPN4		GO:0004867,GO:0005615,GO:0010466,GO:0010951,GO:0030414	serine-type endopeptidase inhibitor activity,extracellular space,negative regulation of peptidase activity,negative regulation of endopeptidase activity,peptidase inhibitor activity
LOC5565449	500.061	-1.31285	0.160877	-8.16062	3.3332e-16	3.39628e-15	AAEL000642	alpha-amylase [Source:VB Community Annotation]			GO:0003824,GO:0005975,GO:0008152,GO:0016798	catalytic activity,carbohydrate metabolic process,metabolic process,hydrolase activity, acting on glycosyl bonds
LOC110675449	197.035	-2.04075	0.250093	-8.15998	3.35082e-16	3.41185e-15	AAEL026131
LOC5576354	163.65	1.50801	0.184832	8.15883	3.38291e-16	3.44212e-15	AAEL002878	NADH:ubiquinone dehydrogenase, putative [Source:VB Community Annotation]
LOC5572284	25311.1	0.863007	0.105847	8.15338	3.53893e-16	3.59837e-15	AAEL001759	40S ribosomal protein S9 [Source:UniProtKB/TrEMBL;Acc:Q1HRP3]	RpS9		GO:0003723,GO:0003735,GO:0005840,GO:0006412,GO:0015935,GO:0019843	RNA binding,structural constituent of ribosome,ribosome,translation,small ribosomal subunit,rRNA binding
LOC5575748	2517.82	1.44721	0.177547	8.15114	3.60518e-16	3.66318e-15	AAEL012057	enhancer of polycomb [Source:VB Community Annotation]			GO:0005634,GO:0006357,GO:0032777,GO:0035267	nucleus,regulation of transcription by RNA polymerase II,Piccolo NuA4 histone acetyltransferase complex,NuA4 histone acetyltransferase complex
LOC110678990	50.0302	-4.37718	0.53719	-8.1483	3.69086e-16	3.74762e-15	AAEL025163
LOC5578071	194.677	-2.3992	0.294489	-8.147	3.73072e-16	3.78546e-15	AAEL013504	T-box transcription factor tbx6 [Source:UniProtKB/TrEMBL;Acc:A0A1S4FZR2]			GO:0003677,GO:0003700,GO:0005634,GO:0006355	DNA binding,DNA-binding transcription factor activity,nucleus,regulation of transcription, DNA-templated
LOC5575408	883.661	-0.977651	0.12003	-8.14507	3.79066e-16	3.84361e-15	AAEL011819	Cohesin loading complex subunit SCC4 homolog [Source:VB Community Annotation]			GO:0000785,GO:0005515,GO:0005634,GO:0005654,GO:0007049,GO:0007059,GO:0007064,GO:0032116,GO:0034088,GO:0051301	chromatin,protein binding,nucleus,nucleoplasm,cell cycle,chromosome segregation,mitotic sister chromatid cohesion,SMC loading complex,maintenance of mitotic sister chromatid cohesion,cell division
LOC5567359	821.055	1.88988	0.232247	8.13737	4.03954e-16	4.09312e-15	AAEL006037				GO:0005515	protein binding
LOC5572968	82411.4	1.01104	0.124253	8.13698	4.05255e-16	4.10345e-15	AAEL010168	40S ribosomal protein S2 [Source:UniProtKB/TrEMBL;Acc:Q1HRV1]	RpS2		GO:0003723,GO:0003735,GO:0005840,GO:0006412,GO:0015935,GO:1990904	RNA binding,structural constituent of ribosome,ribosome,translation,small ribosomal subunit,ribonucleoprotein complex
LOC5578122	3226.01	2.42966	0.298818	8.13088	4.26178e-16	4.31127e-15	AAEL003425				GO:0003824,GO:0005515,GO:0005576,GO:0005975,GO:0006030,GO:0008061	catalytic activity,protein binding,extracellular region,carbohydrate metabolic process,chitin metabolic process,chitin binding
LOC5578935	758.714	1.09593	0.134787	8.13083	4.2637e-16	4.31127e-15	AAEL003770				GO:0003824,GO:0004140,GO:0005524,GO:0009058,GO:0015937,GO:0016301,GO:0016310	catalytic activity,dephospho-CoA kinase activity,ATP binding,biosynthetic process,coenzyme A biosynthetic process,kinase activity,phosphorylation
LOC110674152	80.2385	-2.5458	0.313207	-8.12816	4.35867e-16	4.40425e-15	AAEL020330				GO:0000166,GO:0005524	nucleotide binding,ATP binding
LOC5567839	9996.02	0.647135	0.0796179	8.12801	4.36385e-16	4.40643e-15	AAEL001005	calreticulin [Source:VB Community Annotation]			GO:0005509,GO:0005515,GO:0005783,GO:0005788,GO:0006457,GO:0046872,GO:0051082	calcium ion binding,protein binding,endoplasmic reticulum,endoplasmic reticulum lumen,protein folding,metal ion binding,unfolded protein binding
LOC5570852	605.322	-1.91341	0.235476	-8.12573	4.44696e-16	4.48724e-15	AAEL008632	ABC transporter [Source:VB Community Annotation]			GO:0000166,GO:0005524,GO:0016020,GO:0016021,GO:0016887,GO:0042626	nucleotide binding,ATP binding,membrane,integral component of membrane,ATPase activity,ATPase-coupled transmembrane transporter activity
LOC5568829	573.636	1.07783	0.132678	8.12367	4.52305e-16	4.56087e-15	AAEL001175	DNA photolyase [Source:VB Community Annotation]
LOC5564419	458.591	-2.02485	0.249348	-8.12059	4.6391e-16	4.67466e-15	AAEL019808				GO:0003677,GO:0003700,GO:0005634,GO:0006355	DNA binding,DNA-binding transcription factor activity,nucleus,regulation of transcription, DNA-templated
LOC5571232	348.58	2.30774	0.284307	8.11708	4.77516e-16	4.80845e-15	AAEL024784				GO:0004252,GO:0006508	serine-type endopeptidase activity,proteolysis
LOC5572778	1190.06	-0.855966	0.105471	-8.11563	4.83268e-16	4.86301e-15	AAEL010048	26S proteasome non-ATPase regulatory subunit [Source:VB Community Annotation]			GO:0000502,GO:0030234,GO:0050790	proteasome complex,enzyme regulator activity,regulation of catalytic activity
LOC5580062	874.587	-0.940747	0.115934	-8.11449	4.87839e-16	4.90563e-15	AAEL002135	tubulin-specific chaperone b (tubulin folding cofactor b) [Source:VB Community Annotation]			GO:0005515	protein binding
LOC5577178	707.358	-1.05305	0.129861	-8.10909	5.10004e-16	5.12498e-15	AAEL013047	sphingolipid delta 4 desaturase/c-4 hydroxylase protein des2 [Source:VB Community Annotation]			GO:0006629,GO:0016020,GO:0016021,GO:0016491,GO:0030148,GO:0042284,GO:0055114	lipid metabolic process,membrane,integral component of membrane,oxidoreductase activity,sphingolipid biosynthetic process,sphingolipid delta-4 desaturase activity,oxidation-reduction process
LOC5565417	471.997	-1.45456	0.179489	-8.10385	5.32453e-16	5.34689e-15	AAEL000649				GO:0016020,GO:0016021	membrane,integral component of membrane
LOC5571581	180.352	-1.73516	0.214181	-8.10136	5.43463e-16	5.45369e-15	AAEL014151	six/sine homebox transcription factors [Source:VB Community Annotation]			GO:0000981,GO:0003677,GO:0005634,GO:0006355,GO:0006357,GO:0043565	DNA-binding transcription factor activity, RNA polymerase II-specific,DNA binding,nucleus,regulation of transcription, DNA-templated,regulation of transcription by RNA polymerase II,sequence-specific DNA binding
LOC110678950	2147	0.888257	0.109698	8.09728	5.62007e-16	5.63422e-15	AAEL021314
LOC5567981	665.744	-1.47532	0.1822	-8.09723	5.62225e-16	5.63422e-15	AAEL006419	recombining binding protein suppressor of hairless [Source:VB Community Annotation]			GO:0000978,GO:0001228,GO:0003677,GO:0003700,GO:0005634,GO:0006355,GO:0006357,GO:0045944	RNA polymerase II cis-regulatory region sequence-specific DNA binding,DNA-binding transcription activator activity, RNA polymerase II-specific,DNA binding,DNA-binding transcription factor activity,nucleus,regulation of transcription, DNA-templated,regulation of transcription by RNA polymerase II,positive regulation of transcription by RNA polymerase II
LOC110677152	2402.59	1.31544	0.162458	8.09711	5.62816e-16	5.63627e-15	AAEL022478	Putative transcriptional repressor protein yy1 [Source:UniProtKB/TrEMBL;Acc:A0A0P6IYK9]			GO:0003676	nucleic acid binding
LOC5566027	695.029	1.32299	0.163452	8.09403	5.77231e-16	5.77666e-15	AAEL005100
LOC5571901	1025.97	-1.98578	0.245472	-8.08966	5.98313e-16	5.97974e-15	AAEL009376				GO:0003700,GO:0005634,GO:0006355,GO:0006357,GO:0032502,GO:0043565	DNA-binding transcription factor activity,nucleus,regulation of transcription, DNA-templated,regulation of transcription by RNA polymerase II,developmental process,sequence-specific DNA binding
LOC5571607	146.815	2.17355	0.268683	8.08965	5.98343e-16	5.97974e-15	AAEL009198				GO:0016020,GO:0016021,GO:0022857,GO:0055085	membrane,integral component of membrane,transmembrane transporter activity,transmembrane transport
LOC5568649	517.403	-1.97581	0.244513	-8.08059	6.44529e-16	6.4369e-15	AAEL007018	udp-glucose 4-epimerase [Source:VB Community Annotation]			GO:0003974,GO:0003978,GO:0005975,GO:0006012,GO:0016853	UDP-N-acetylglucosamine 4-epimerase activity,UDP-glucose 4-epimerase activity,carbohydrate metabolic process,galactose metabolic process,isomerase activity
LOC5571277	2165.74	-1.00732	0.124666	-8.08017	6.46761e-16	6.45478e-15	AAEL019617				GO:0000977,GO:0003677,GO:0005634,GO:0045944,GO:0046983	RNA polymerase II transcription regulatory region sequence-specific DNA binding,DNA binding,nucleus,positive regulation of transcription by RNA polymerase II,protein dimerization activity
LOC5568743	1605.47	-2.02176	0.250227	-8.07971	6.49204e-16	6.47473e-15	AAEL007092	Phospholipase B-like [Source:UniProtKB/TrEMBL;Acc:Q0IF22]			GO:0004620,GO:0006629,GO:0016020,GO:0016021,GO:0016042,GO:0016787	phospholipase activity,lipid metabolic process,membrane,integral component of membrane,lipid catabolic process,hydrolase activity
LOC5572314	840.31	1.19612	0.148053	8.07903	6.52823e-16	6.50638e-15	AAEL022930
LOC110678757	54.8862	3.2393	0.401008	8.0779	6.58929e-16	6.56275e-15	AAEL026208
LOC5565892	5720.79	-1.30537	0.161643	-8.07567	6.71052e-16	6.67893e-15	AAEL000713	reticulon/nogo [Source:VB Community Annotation]			GO:0005783,GO:0005789,GO:0016020,GO:0016021	endoplasmic reticulum,endoplasmic reticulum membrane,membrane,integral component of membrane
LOC5565537	1380.23	1.43461	0.177696	8.07336	6.83884e-16	6.80201e-15	AAEL004853	glycerol kinase [Source:VB Community Annotation]			GO:0000166,GO:0004370,GO:0005524,GO:0005975,GO:0006071,GO:0006072,GO:0016301,GO:0016310,GO:0016740,GO:0016773,GO:0019563	nucleotide binding,glycerol kinase activity,ATP binding,carbohydrate metabolic process,glycerol metabolic process,glycerol-3-phosphate metabolic process,kinase activity,phosphorylation,transferase activity,phosphotransferase activity, alcohol group as acceptor,glycerol catabolic process
LOC5570856	53.3019	-3.59809	0.446309	-8.06188	7.5129e-16	7.46735e-15	AAEL008622	jnk [Source:VB Community Annotation]			GO:0000165,GO:0004672,GO:0004707,GO:0005524,GO:0006468	MAPK cascade,protein kinase activity,MAP kinase activity,ATP binding,protein phosphorylation
LOC5579065	801.098	1.48077	0.183694	8.0611	7.56126e-16	7.5103e-15	AAEL014003				GO:0005515	protein binding
LOC5574638	1268.11	-1.50844	0.187192	-8.05826	7.7391e-16	7.68171e-15	AAEL011277	apoptosis stimulating of P53 [Source:VB Community Annotation]			GO:0005515	protein binding
LOC5577105	838.406	1.17586	0.146052	8.05096	8.21493e-16	8.14847e-15	AAEL013005
LOC110678447	427.194	-1.86484	0.231924	-8.04074	8.92946e-16	8.8512e-15	AAEL025333				GO:0003676	nucleic acid binding
LOC5573757	1324.33	-1.46425	0.182108	-8.04054	8.94451e-16	8.86011e-15	AAEL000278	poly(p)/ATP NAD kinase [Source:VB Community Annotation]			GO:0003951,GO:0006741,GO:0016301,GO:0016310,GO:0016740,GO:0019674	NAD+ kinase activity,NADP biosynthetic process,kinase activity,phosphorylation,transferase activity,NAD metabolic process
LOC5572100	1805.37	2.29336	0.285474	8.0335	9.47304e-16	9.37728e-15	AAEL028105
LOC110677854	12860.7	-1.8795	0.234003	-8.03194	9.59454e-16	9.49112e-15	AAEL028093
LOC5573224	1421.86	1.00591	0.125243	8.03168	9.61455e-16	9.50446e-15	AAEL010315				GO:0005737,GO:0036158,GO:0046872	cytoplasm,outer dynein arm assembly,metal ion binding
LOC5565528	120.96	2.93372	0.365337	8.03017	9.73405e-16	9.61609e-15	AAEL004861	peroxisomal integral membrane protein Per8p, putative [Source:VB Community Annotation]			GO:0046872	metal ion binding
LOC5569750	10932.8	-0.888982	0.11077	-8.02545	1.01153e-15	9.98594e-15	AAEL007915	Moesin/ezrin/radixin homolog 1 [Source:UniProtKB/TrEMBL;Acc:A0A1S4FI28]			GO:0003779,GO:0005737,GO:0005856,GO:0005886,GO:0005912,GO:0008092,GO:0016020,GO:0030054,GO:0045197	actin binding,cytoplasm,cytoskeleton,plasma membrane,adherens junction,cytoskeletal protein binding,membrane,cell junction,establishment or maintenance of epithelial cell apical/basal polarity
LOC5568072	1500.1	-1.36014	0.169494	-8.02468	1.01791e-15	1.00422e-14	AAEL006514	sodium-dependent phosphate transporter [Source:VB Community Annotation]			GO:0016020,GO:0016021,GO:0022857,GO:0055085	membrane,integral component of membrane,transmembrane transporter activity,transmembrane transport
LOC5574556	549.803	-2.61116	0.32541	-8.02422	1.02171e-15	1.00728e-14	AAEL011231				GO:0003677,GO:0003700,GO:0005634,GO:0006355,GO:0008270,GO:0042025,GO:0043565,GO:0046872	DNA binding,DNA-binding transcription factor activity,nucleus,regulation of transcription, DNA-templated,zinc ion binding,host cell nucleus,sequence-specific DNA binding,metal ion binding
LOC5576026	465.284	-1.18191	0.147308	-8.02337	1.0288e-15	1.01359e-14	AAEL019621				GO:0016020,GO:0016021	membrane,integral component of membrane
LOC5573067	6674.39	-1.11972	0.13956	-8.02325	1.02983e-15	1.01392e-14	AAEL010248	fibrillarin [Source:VB Community Annotation]			GO:0003723,GO:0006364,GO:0008168,GO:0016740,GO:0032259	RNA binding,rRNA processing,methyltransferase activity,transferase activity,methylation
LOC110675573	853.279	-1.09822	0.136888	-8.02272	1.03429e-15	1.01762e-14	AAEL027407
LOC5566463	628.943	1.06042	0.132191	8.0219	1.0412e-15	1.02373e-14	AAEL005406
LOC5569687	240.039	1.75537	0.218845	8.02105	1.04847e-15	1.03018e-14	AAEL007839	beta-hexosaminidase [Source:VB Community Annotation]			GO:0004553,GO:0004563,GO:0005975,GO:0008152,GO:0016787,GO:0016798,GO:0102148	hydrolase activity, hydrolyzing O-glycosyl compounds,beta-N-acetylhexosaminidase activity,carbohydrate metabolic process,metabolic process,hydrolase activity,hydrolase activity, acting on glycosyl bonds,N-acetyl-beta-D-galactosaminidase activity
LOC5568325	204.234	2.45622	0.306363	8.01734	1.08059e-15	1.06103e-14	AAEL006718	Sugar transporter SWEET [Source:UniProtKB/TrEMBL;Acc:Q174X0]			GO:0000139,GO:0005886,GO:0008643,GO:0016020,GO:0016021	Golgi membrane,plasma membrane,carbohydrate transport,membrane,integral component of membrane
LOC110680805	318.138	1.43244	0.178746	8.0138	1.11219e-15	1.09133e-14	AAEL021629				GO:0003676,GO:0005634,GO:0008270,GO:0046872	nucleic acid binding,nucleus,zinc ion binding,metal ion binding
LOC5572867	2271.39	-0.716635	0.0894268	-8.01365	1.1135e-15	1.09187e-14	AAEL010087	26S proteasome alpha 3 subunit [Source:VB Community Annotation]	Prosalpha3		GO:0000502,GO:0004175,GO:0004298,GO:0005634,GO:0005737,GO:0005839,GO:0006508,GO:0006511,GO:0008233,GO:0016787,GO:0019773,GO:0051603	proteasome complex,endopeptidase activity,threonine-type endopeptidase activity,nucleus,cytoplasm,proteasome core complex,proteolysis,ubiquitin-dependent protein catabolic process,peptidase activity,hydrolase activity,proteasome core complex, alpha-subunit complex,proteolysis involved in cellular protein catabolic process
LOC5564326	2090.58	1.88779	0.235628	8.01176	1.13083e-15	1.10812e-14	AAEL019671
LOC5574541	815.44	1.02612	0.128081	8.01152	1.13299e-15	1.10949e-14	AAEL011209	bat5 hla-b-associated transcript [Source:VB Community Annotation]			GO:0016020,GO:0016021	membrane,integral component of membrane
LOC5579840	5860.33	-0.973174	0.121507	-8.00921	1.15445e-15	1.12975e-14	AAEL005843
LOC5575730	138.949	-1.90996	0.238498	-8.00831	1.16297e-15	1.13733e-14	AAEL012037	sulphate transporter [Source:VB Community Annotation]			GO:0008271,GO:0008272,GO:0015116,GO:0016020,GO:0016021,GO:0055085,GO:1902358	secondary active sulfate transmembrane transporter activity,sulfate transport,sulfate transmembrane transporter activity,membrane,integral component of membrane,transmembrane transport,sulfate transmembrane transport
LOC5565112	117.138	1.85928	0.232243	8.00575	1.18744e-15	1.16048e-14	AAEL021790				GO:0003676	nucleic acid binding
LOC110676980	223.597	-1.89995	0.237333	-8.00543	1.19049e-15	1.16268e-14	AAEL024746
LOC5578628	808.981	2.16078	0.269942	8.0046	1.19859e-15	1.1698e-14	AAEL019997
LOC5572889	335.862	1.28929	0.161075	8.00427	1.20174e-15	1.1721e-14	AAEL010112				GO:0007059,GO:0106035	chromosome segregation,protein maturation by [4Fe-4S] cluster transfer
LOC5574304	134.686	2.4117	0.301389	8.00197	1.22446e-15	1.19346e-14	AAEL011070	C-Type Lectin (CTL) - galactose binding. [Source:VB Community Annotation]	CTLGA3		GO:0030246	carbohydrate binding
LOC5563579	622.612	1.02352	0.127919	8.00128	1.23133e-15	1.19936e-14	AAEL000088	brefeldin A-sensitive peripheral Golgi protein, putative [Source:VB Community Annotation]			GO:0005794,GO:0007030,GO:0015031,GO:0016020	Golgi apparatus,Golgi organization,protein transport,membrane
LOC5565105	921.223	1.58801	0.19851	7.99965	1.24778e-15	1.21457e-14	AAEL004592	tyrosine-protein kinase src64b [Source:VB Community Annotation]			GO:0000166,GO:0004672,GO:0004713,GO:0004715,GO:0005515,GO:0005524,GO:0006468,GO:0016301,GO:0016310,GO:0016740,GO:0018108	nucleotide binding,protein kinase activity,protein tyrosine kinase activity,non-membrane spanning protein tyrosine kinase activity,protein binding,ATP binding,protein phosphorylation,kinase activity,phosphorylation,transferase activity,peptidyl-tyrosine phosphorylation
LOC5568875	269.49	2.3571	0.294982	7.99064	1.3424e-15	1.3058e-14	AAEL020233				GO:0008418,GO:0016787,GO:0016811,GO:0070773	protein-N-terminal asparagine amidohydrolase activity,hydrolase activity,hydrolase activity, acting on carbon-nitrogen (but not peptide) bonds, in linear amides,protein-N-terminal glutamine amidohydrolase activity
LOC5564796	759.734	1.16847	0.146244	7.98989	1.35063e-15	1.31292e-14	AAEL004437	dual-specificity protein phosphatase, putative [Source:VB Community Annotation]			GO:0004721,GO:0004725,GO:0006470,GO:0008138,GO:0016311,GO:0016787,GO:0016791,GO:0035335	phosphoprotein phosphatase activity,protein tyrosine phosphatase activity,protein dephosphorylation,protein tyrosine/serine/threonine phosphatase activity,dephosphorylation,hydrolase activity,phosphatase activity,peptidyl-tyrosine dephosphorylation
LOC5575254	1398.04	-2.42215	0.303203	-7.98853	1.36556e-15	1.32656e-14	AAEL011716	tartan [Source:VB Community Annotation]			GO:0005515,GO:0016020,GO:0016021	protein binding,membrane,integral component of membrane
LOC5569337	865.535	-0.903598	0.113129	-7.98734	1.3788e-15	1.33853e-14	AAEL007541	DNA polymerase delta small subunit [Source:VB Community Annotation]			GO:0003677,GO:0003887,GO:0005634,GO:0006260	DNA binding,DNA-directed DNA polymerase activity,nucleus,DNA replication
LOC110680256	492.038	1.0539	0.132017	7.98306	1.42745e-15	1.38484e-14	AAEL025207				GO:0003676	nucleic acid binding
LOC5579188	2192.57	-0.86788	0.108719	-7.98277	1.43081e-15	1.38717e-14	AAEL003875	transcription factor SP4, putative [Source:VB Community Annotation]			GO:0003676	nucleic acid binding
LOC5575286	1680.14	-0.982011	0.123019	-7.98258	1.43306e-15	1.38843e-14	AAEL023265				GO:0006355	regulation of transcription, DNA-templated
LOC23687778	308.766	3.12888	0.391998	7.98187	1.44137e-15	1.39556e-14	AAEL027911
LOC5568814	504.147	1.50164	0.188216	7.97824	1.48435e-15	1.43621e-14	AAEL001194	fatty acid synthase [Source:VB Community Annotation]	FAS1		GO:0003824,GO:0004312,GO:0004313,GO:0004314,GO:0004315,GO:0004316,GO:0004317,GO:0004320,GO:0006631,GO:0006633,GO:0008152,GO:0008659,GO:0008693,GO:0009058,GO:0016295,GO:0016296,GO:0016297,GO:0016418,GO:0016419,GO:0016491,GO:0016740,GO:0016746,GO:0016788,GO:0016829,GO:0019171,GO:0031177,GO:0047117,GO:0047451,GO:0055114,GO:0102131,GO:0102132	catalytic activity,fatty acid synthase activity,[acyl-carrier-protein] S-acetyltransferase activity,[acyl-carrier-protein] S-malonyltransferase activity,3-oxoacyl-[acyl-carrier-protein] synthase activity,3-oxoacyl-[acyl-carrier-protein] reductase (NADPH) activity,3-hydroxypalmitoyl-[acyl-carrier-protein] dehydratase activity,oleoyl-[acyl-carrier-protein] hydrolase activity,fatty acid metabolic pr…
LOC5576190	319.728	2.24206	0.281036	7.97785	1.48909e-15	1.43985e-14	AAEL012381
LOC23687992	108.546	-2.3816	0.298535	-7.97764	1.49159e-15	1.44131e-14	AAEL017572				GO:0000166,GO:0005524,GO:0016020,GO:0016021,GO:0016887,GO:0042626,GO:0055085	nucleotide binding,ATP binding,membrane,integral component of membrane,ATPase activity,ATPase-coupled transmembrane transporter activity,transmembrane transport
LOC5575230	426.437	1.7046	0.21369	7.97697	1.49969e-15	1.44818e-14	AAEL011684				GO:0016020,GO:0016021	membrane,integral component of membrane
LOC5578348	1257.92	1.25332	0.157165	7.97457	1.52918e-15	1.47568e-14	AAEL003548	sulphate transporter [Source:VB Community Annotation]			GO:0008271,GO:0008272,GO:0015116,GO:0016020,GO:0016021,GO:0055085,GO:1902358	secondary active sulfate transmembrane transporter activity,sulfate transport,sulfate transmembrane transporter activity,membrane,integral component of membrane,transmembrane transport,sulfate transmembrane transport
LOC5570568	507.362	1.92519	0.241456	7.97324	1.54564e-15	1.49058e-14	AAEL018155				GO:0006857,GO:0016020,GO:0016021,GO:0022857,GO:0055085	oligopeptide transport,membrane,integral component of membrane,transmembrane transporter activity,transmembrane transport
LOC5575526	591.172	1.6553	0.207698	7.96977	1.58975e-15	1.5321e-14	AAEL011900	N-acetyllactosaminide beta-1,3-N-acetylglucosaminyltransferase, putative [Source:VB Community Annotation]			GO:0016020,GO:0016021,GO:0016740	membrane,integral component of membrane,transferase activity
LOC5571220	691.072	1.32834	0.166705	7.96826	1.60929e-15	1.54992e-14	AAEL008906
LOC5572265	5704.53	-1.31356	0.16489	-7.96625	1.63562e-15	1.57423e-14	AAEL001769	DEAD box ATP-dependent RNA helicase [Source:VB Community Annotation]			GO:0000166,GO:0003676,GO:0003724,GO:0004386,GO:0005524,GO:0016787	nucleotide binding,nucleic acid binding,RNA helicase activity,helicase activity,ATP binding,hydrolase activity
LOC5567636	1891.81	-2.1802	0.273839	-7.96161	1.69819e-15	1.63337e-14	AAEL024235				GO:0001726,GO:0003779,GO:0005200,GO:0005737,GO:0005856,GO:0005925,GO:0006897,GO:0007010,GO:0007016,GO:0007155,GO:0016020,GO:0030276,GO:0051015	ruffle,actin binding,structural constituent of cytoskeleton,cytoplasm,cytoskeleton,focal adhesion,endocytosis,cytoskeleton organization,obsolete cytoskeletal anchoring at plasma membrane,cell adhesion,membrane,clathrin binding,actin filament binding
LOC5578709	1060.81	-1.28387	0.161273	-7.96086	1.70842e-15	1.64214e-14	AAEL013818	spliceosome associated protein [Source:VB Community Annotation]			GO:0003723,GO:0005515,GO:0005634,GO:0005681,GO:0006396,GO:0006397,GO:0008380	RNA binding,protein binding,nucleus,spliceosomal complex,RNA processing,mRNA processing,RNA splicing
LOC5575622	103.29	2.26567	0.284651	7.95945	1.72802e-15	1.65987e-14	AAEL011950				GO:0006508,GO:0008233,GO:0008234,GO:0071567	proteolysis,peptidase activity,cysteine-type peptidase activity,UFM1 hydrolase activity
LOC5565423	3079.94	-1.81371	0.22791	-7.95803	1.74797e-15	1.67793e-14	AAEL000656	pangolin [Source:VB Community Annotation]			GO:0003677,GO:0005634,GO:0016055	DNA binding,nucleus,Wnt signaling pathway
LOC5574607	476.184	-2.41212	0.303124	-7.95754	1.75491e-15	1.68349e-14	AAEL002412	monocarboxylate transporter [Source:VB Community Annotation]			GO:0016020,GO:0016021,GO:0022857,GO:0055085	membrane,integral component of membrane,transmembrane transporter activity,transmembrane transport
LOC5573381	207.408	-2.18464	0.274681	-7.95338	1.81488e-15	1.73988e-14	AAEL028161				GO:0000166,GO:0004672,GO:0005524,GO:0006468	nucleotide binding,protein kinase activity,ATP binding,protein phosphorylation
LOC5567316	170.561	-3.00986	0.378568	-7.95065	1.85539e-15	1.77754e-14	AAEL013894				GO:0016747	transferase activity, transferring acyl groups other than amino-acyl groups
LOC5569771	601.828	-1.08685	0.136704	-7.95039	1.8593e-15	1.78012e-14	AAEL007891	xtp3-transactivated protein b [Source:VB Community Annotation]			GO:0005783	endoplasmic reticulum
LOC5572734	340.739	1.85901	0.233911	7.94749	1.90323e-15	1.82099e-14	AAEL009999				GO:0003677,GO:0004518,GO:0004519,GO:0005634,GO:0006281,GO:0048476,GO:0090305	DNA binding,nuclease activity,endonuclease activity,nucleus,DNA repair,Holliday junction resolvase complex,nucleic acid phosphodiester bond hydrolysis
LOC5571126	1597.05	-1.16	0.146158	-7.93662	2.07759e-15	1.98651e-14	AAEL001516	vesicle associated protein, putative [Source:VB Community Annotation]			GO:0005515,GO:0005737,GO:0005783,GO:0005789,GO:0006888,GO:0016192	protein binding,cytoplasm,endoplasmic reticulum,endoplasmic reticulum membrane,endoplasmic reticulum to Golgi vesicle-mediated transport,vesicle-mediated transport
LOC5573302	816.049	1.3483	0.169953	7.93338	2.13262e-15	2.03779e-14	AAEL022867				GO:0016020,GO:0016021,GO:0016740,GO:0016746	membrane,integral component of membrane,transferase activity,transferase activity, transferring acyl groups
LOC5567814	65.5836	-4.12245	0.519742	-7.93172	2.16127e-15	2.06382e-14	AAEL018150				GO:0016020,GO:0016021,GO:0022857,GO:0055085	membrane,integral component of membrane,transmembrane transporter activity,transmembrane transport
LOC5568305	142.929	1.79758	0.22665	7.93109	2.17225e-15	2.07294e-14	AAEL006723				GO:0005515	protein binding
LOC110681266	109.516	-1.93248	0.243758	-7.92786	2.22953e-15	2.12621e-14	AAEL022100				GO:0006974,GO:0008283	cellular response to DNA damage stimulus,cell population proliferation
LOC23687653	2137.91	-0.802118	0.10119	-7.92687	2.24745e-15	2.1419e-14	AAEL019909				GO:0003677,GO:0005515,GO:0005634,GO:0008270,GO:0046872	DNA binding,protein binding,nucleus,zinc ion binding,metal ion binding
LOC110678373	63.6109	2.91086	0.36737	7.9235	2.30917e-15	2.19929e-14	AAEL027307				GO:0035368	selenocysteine insertion sequence binding
LOC5578034	171.638	2.29995	0.290392	7.92015	2.37219e-15	2.25783e-14	AAEL013473	cAMP-specific 3,5-cyclic phosphodiesterase [Source:VB Community Annotation]			GO:0004114,GO:0007165,GO:0008081,GO:0016787,GO:0046872	3',5'-cyclic-nucleotide phosphodiesterase activity,signal transduction,phosphoric diester hydrolase activity,hydrolase activity,metal ion binding
LOC5564929	1610.21	-1.67352	0.211308	-7.9198	2.37893e-15	2.26277e-14	AAEL004488				GO:0016020	membrane
LOC5567588	803.259	1.57275	0.198665	7.9166	2.44093e-15	2.32024e-14	AAEL006188				GO:0005856,GO:0005886,GO:0008360,GO:0016020,GO:0017048,GO:0035023	cytoskeleton,plasma membrane,regulation of cell shape,membrane,Rho GTPase binding,regulation of Rho protein signal transduction
LOC5570243	23484.8	0.760568	0.0962064	7.90559	2.66666e-15	2.53315e-14	AAEL008192	40S ribosomal protein S3 [Source:UniProtKB/TrEMBL;Acc:Q4F6X0]	RpS3		GO:0003723,GO:0003735,GO:0005840,GO:0006412,GO:0015935	RNA binding,structural constituent of ribosome,ribosome,translation,small ribosomal subunit
LOC5570058	1849.11	1.34122	0.169734	7.90192	2.74651e-15	2.60731e-14	AAEL000217	serine/threonine protein kinase [Source:VB Community Annotation]			GO:0004672,GO:0005524,GO:0006468	protein kinase activity,ATP binding,protein phosphorylation
LOC5567407	333.609	1.19315	0.151074	7.89778	2.83915e-15	2.6935e-14	AAEL021592				GO:0003958,GO:0005737,GO:0010181,GO:0016491,GO:0055114	NADPH-hemoprotein reductase activity,cytoplasm,FMN binding,oxidoreductase activity,oxidation-reduction process
LOC5565520	1042.24	-1.41994	0.17981	-7.89687	2.85991e-15	2.71143e-14	AAEL014871	methylenetetrahydrofolate dehydrogenase [Source:VB Community Annotation]			GO:0003824,GO:0004477,GO:0004488,GO:0006730,GO:0016491,GO:0016787,GO:0055114	catalytic activity,methenyltetrahydrofolate cyclohydrolase activity,methylenetetrahydrofolate dehydrogenase (NADP+) activity,one-carbon metabolic process,oxidoreductase activity,hydrolase activity,oxidation-reduction process
LOC110679281	111.84	-1.90758	0.241694	-7.89253	2.96117e-15	2.80562e-14	AAEL022980
LOC5569204	264.335	1.24558	0.157924	7.88719	3.09069e-15	2.92643e-14	AAEL007464				GO:0003676,GO:0005634,GO:0008270,GO:0046872	nucleic acid binding,nucleus,zinc ion binding,metal ion binding
LOC110679868	8158.36	-0.799826	0.101443	-7.88447	3.15864e-15	2.98883e-14	AAEL027050	Putative 52k active chromatin boundary protein [Source:UniProtKB/TrEMBL;Acc:A0A0P6IYK3]			GO:0003676,GO:0003723,GO:0005634	nucleic acid binding,RNA binding,nucleus
LOC5573208	324.668	-1.87195	0.23749	-7.88223	3.21582e-15	3.04096e-14	AAEL010308
LOC5570857	3142.63	1.65079	0.20945	7.88154	3.23364e-15	3.05583e-14	AAEL008634	jnk [Source:VB Community Annotation]			GO:0000165,GO:0004672,GO:0004674,GO:0004707,GO:0005524,GO:0006468,GO:0016301,GO:0016310,GO:0016740	MAPK cascade,protein kinase activity,protein serine/threonine kinase activity,MAP kinase activity,ATP binding,protein phosphorylation,kinase activity,phosphorylation,transferase activity
LOC5564538	859.759	1.09548	0.13907	7.87723	3.34718e-15	3.16108e-14	AAEL023825				GO:0003676	nucleic acid binding
LOC5572409	1008.94	-1.81795	0.230852	-7.87496	3.40865e-15	3.21705e-14	AAEL019468				GO:0004867,GO:0005576,GO:0008233,GO:0010466,GO:0010951,GO:0030414	serine-type endopeptidase inhibitor activity,extracellular region,peptidase activity,negative regulation of peptidase activity,negative regulation of endopeptidase activity,peptidase inhibitor activity
LOC5578353	393.153	1.878	0.238587	7.87134	3.5087e-15	3.30934e-14	AAEL019453				GO:0005549,GO:0005783,GO:0005789,GO:0006486,GO:0015012,GO:0015020,GO:0016021,GO:0016757,GO:0046872,GO:0050508,GO:0050509	odorant binding,endoplasmic reticulum,endoplasmic reticulum membrane,protein glycosylation,heparan sulfate proteoglycan biosynthetic process,glucuronosyltransferase activity,integral component of membrane,transferase activity, transferring glycosyl groups,metal ion binding,glucuronosyl-N-acetylglucosaminyl-proteoglycan 4-alpha-N-acetylglucosaminyltransferase activity,N-acetylglucosaminyl-proteogl…
LOC110680554	492.994	1.34445	0.170857	7.86887	3.57859e-15	3.37187e-14	AAEL025271				GO:0004430	1-phosphatidylinositol 4-kinase activity
LOC5577191	1591.97	-1.2317	0.156529	-7.86883	3.57962e-15	3.37187e-14	AAEL013076	signal recognition particle 54 kda protein [Source:VB Community Annotation]			GO:0000166,GO:0003723,GO:0003924,GO:0005525,GO:0005737,GO:0005786,GO:0006614,GO:0008312,GO:0045047,GO:0048500	nucleotide binding,RNA binding,GTPase activity,GTP binding,cytoplasm,signal recognition particle, endoplasmic reticulum targeting,SRP-dependent cotranslational protein targeting to membrane,7S RNA binding,protein targeting to ER,signal recognition particle
LOC110674148	179.372	-2.31959	0.294846	-7.86713	3.62877e-15	3.41596e-14	AAEL027610				GO:0000166,GO:0005524	nucleotide binding,ATP binding
LOC5568208	223.558	-1.97499	0.251055	-7.86673	3.64017e-15	3.42448e-14	AAEL006648	pantothenate kinase [Source:VB Community Annotation]
LOC5564034	1291.22	1.53832	0.195641	7.863	3.75043e-15	3.52593e-14	AAEL004053	Nucleoporin NUP53 [Source:UniProtKB/TrEMBL;Acc:Q17DT3]			GO:0003676,GO:0005634,GO:0005643,GO:0006913,GO:0015031,GO:0017056,GO:0031965,GO:0051028	nucleic acid binding,nucleus,nuclear pore,nucleocytoplasmic transport,protein transport,structural constituent of nuclear pore,nuclear membrane,mRNA transport
LOC5576402	290.359	-3.09679	0.393864	-7.8626	3.76234e-15	3.53486e-14	AAEL012496				GO:0000786,GO:0003677,GO:0005515,GO:0005634,GO:0046982	nucleosome,DNA binding,protein binding,nucleus,protein heterodimerization activity
LOC5572211	65.338	-3.53811	0.450336	-7.8566	3.94686e-15	3.70583e-14	AAEL009609	target of poxn [Source:VB Community Annotation]			GO:0006355,GO:0030182,GO:0046983	regulation of transcription, DNA-templated,neuron differentiation,protein dimerization activity
LOC23687791	414.049	1.1884	0.151282	7.85554	3.98066e-15	3.73517e-14	AAEL017371				GO:0005484,GO:0005794,GO:0006886,GO:0015031,GO:0016020,GO:0016021,GO:0016192,GO:0061025	SNAP receptor activity,Golgi apparatus,intracellular protein transport,protein transport,membrane,integral component of membrane,vesicle-mediated transport,membrane fusion
LOC5578822	1589.31	0.893951	0.113843	7.85251	4.0779e-15	3.82395e-14	AAEL013863	phosphatidylinositol-binding clathrin assembly protein [Source:VB Community Annotation]			GO:0005543,GO:0005545,GO:0030136,GO:0030276,GO:0048268	phospholipid binding,1-phosphatidylinositol binding,clathrin-coated vesicle,clathrin binding,clathrin coat assembly
LOC5566175	764.014	-1.75084	0.223036	-7.85005	4.15861e-15	3.89713e-14	AAEL005237				GO:0016020,GO:0016021	membrane,integral component of membrane
LOC5575105	28978.6	0.866352	0.110387	7.84835	4.21545e-15	3.94786e-14	AAEL011656	40S ribosomal protein S15 [Source:UniProtKB/TrEMBL;Acc:Q16PF7]	RpS15		GO:0003723,GO:0003735,GO:0005840,GO:0006412,GO:0015935	RNA binding,structural constituent of ribosome,ribosome,translation,small ribosomal subunit
LOC5567100	2096.6	-0.865314	0.110256	-7.8482	4.22052e-15	3.95007e-14	AAEL005830	26S proteasome alpha 4 subunit [Source:VB Community Annotation]	Prosalpha4		GO:0000502,GO:0004175,GO:0004298,GO:0005634,GO:0005737,GO:0005839,GO:0006508,GO:0006511,GO:0008233,GO:0016787,GO:0019773,GO:0051603	proteasome complex,endopeptidase activity,threonine-type endopeptidase activity,nucleus,cytoplasm,proteasome core complex,proteolysis,ubiquitin-dependent protein catabolic process,peptidase activity,hydrolase activity,proteasome core complex, alpha-subunit complex,proteolysis involved in cellular protein catabolic process
LOC5576864	567.936	1.42799	0.182025	7.845	4.3294e-15	4.04938e-14	AAEL012845	Mitochondrial import inner membrane translocase subunit TIM44 [Source:UniProtKB/TrEMBL;Acc:Q16KX3]			GO:0005739,GO:0005743,GO:0015031,GO:0016020,GO:0030150,GO:0051087	mitochondrion,mitochondrial inner membrane,protein transport,membrane,protein import into mitochondrial matrix,chaperone binding
LOC5567139	1311.91	1.2991	0.165685	7.84076	4.47813e-15	4.1858e-14	AAEL005890
LOC110679361	362.434	2.1199	0.270623	7.8334	4.74857e-15	4.43575e-14	AAEL009498				GO:0003677,GO:0003899,GO:0006351,GO:0032549	DNA binding,DNA-directed 5'-3' RNA polymerase activity,transcription, DNA-templated,ribonucleoside binding
LOC5564459	52.072	-4.20349	0.536638	-7.833	4.76352e-15	4.44686e-14	AAEL004247	Sialin, Sodium/sialic acid cotransporter, putative [Source:VB Community Annotation]			GO:0016020,GO:0016021,GO:0022857,GO:0055085	membrane,integral component of membrane,transmembrane transporter activity,transmembrane transport
LOC5569127	169.486	-1.64092	0.209581	-7.82956	4.89588e-15	4.56751e-14	AAEL007386				GO:0005267,GO:0006811,GO:0006813,GO:0016020,GO:0016021,GO:0071805	potassium channel activity,ion transport,potassium ion transport,membrane,integral component of membrane,potassium ion transmembrane transport
LOC5575751	601.122	1.58295	0.202186	7.82919	4.91005e-15	4.57779e-14	AAEL002722	protein kinase C inhibitor, putative [Source:VB Community Annotation]			GO:0003824	catalytic activity
LOC5576976	1415.22	-1.01794	0.130025	-7.82881	4.92499e-15	4.58879e-14	AAEL003063	Semaphorin [Source:UniProtKB/TrEMBL;Acc:A0A1S4F3R5]			GO:0005515,GO:0007275,GO:0007399,GO:0016020,GO:0016021,GO:0030154,GO:0030215	protein binding,multicellular organism development,nervous system development,membrane,integral component of membrane,cell differentiation,semaphorin receptor binding
LOC5566936	1994.97	-0.868945	0.111036	-7.82579	5.04478e-15	4.69741e-14	AAEL005699	membrane protein tms1d [Source:VB Community Annotation]			GO:0006658,GO:0006665,GO:0016020,GO:0016021	phosphatidylserine metabolic process,sphingolipid metabolic process,membrane,integral component of membrane
LOC5578088	542.123	1.46182	0.186901	7.82137	5.22534e-15	4.86243e-14	AAEL003402	sphingomyelin phosphodiesterase [Source:VB Community Annotation]			GO:0004767,GO:0005576,GO:0006685,GO:0008152,GO:0016787,GO:0016798,GO:0046872	sphingomyelin phosphodiesterase activity,extracellular region,sphingomyelin catabolic process,metabolic process,hydrolase activity,hydrolase activity, acting on glycosyl bonds,metal ion binding
LOC5567412	941.346	0.968144	0.123839	7.81777	5.37678e-15	5.00017e-14	AAEL022183				GO:0003824,GO:0004571,GO:0005509,GO:0005975,GO:0008152,GO:0016020,GO:0016787,GO:0016798	catalytic activity,mannosyl-oligosaccharide 1,2-alpha-mannosidase activity,calcium ion binding,carbohydrate metabolic process,metabolic process,membrane,hydrolase activity,hydrolase activity, acting on glycosyl bonds
LOC5563914	289.184	1.28138	0.163955	7.81544	5.47695e-15	5.09007e-14	AAEL003995	zinc binding dehydrogenase [Source:VB Community Annotation]			GO:0016491,GO:0055114	oxidoreductase activity,oxidation-reduction process
LOC110674056	219.048	3.05956	0.391598	7.81301	5.58384e-15	5.18612e-14	AAEL026343				GO:0000166,GO:0003676,GO:0003779,GO:0003824,GO:0004386,GO:0005524,GO:0006310,GO:0044237	nucleotide binding,nucleic acid binding,actin binding,catalytic activity,helicase activity,ATP binding,DNA recombination,cellular metabolic process
LOC5571252	91.1929	-3.24667	0.415671	-7.81067	5.68846e-15	5.27992e-14	AAEL001594				GO:0003676	nucleic acid binding
LOC5565839	11827.1	0.844074	0.108075	7.81007	5.7155e-15	5.30165e-14	AAEL005027	acidic ribosomal protein P1, putative [Source:VB Community Annotation]	RpLP1		GO:0003735,GO:0005840,GO:0006412,GO:0006414	structural constituent of ribosome,ribosome,translation,translational elongation
LOC5569124	17562.2	0.840479	0.107667	7.80627	5.89038e-15	5.46039e-14	AAEL007385	Ferritin subunit Precursor (EC 1.16.3.1)(Ferritin heavy chain-like protein)(AeFer(H)) [Source:VB Community Annotation]			GO:0004322,GO:0005576,GO:0006826,GO:0006879,GO:0008199,GO:0016491,GO:0046872,GO:0055114	ferroxidase activity,extracellular region,iron ion transport,cellular iron ion homeostasis,ferric iron binding,oxidoreductase activity,metal ion binding,oxidation-reduction process
LOC5577707	131.205	-1.85444	0.237615	-7.80441	5.97818e-15	5.53826e-14	AAEL013350	heat shock protein 26kD, putative [Source:VB Community Annotation]			GO:0046872	metal ion binding
LOC5576062	283.992	2.09117	0.267952	7.80426	5.98496e-15	5.54103e-14	AAEL014333				GO:0005929,GO:0030030,GO:0042995	cilium,cell projection organization,cell projection
LOC5575283	426.579	1.04459	0.133854	7.804	5.99749e-15	5.5491e-14	AAEL011738				GO:0003676,GO:0005634,GO:0006397,GO:0008380	nucleic acid binding,nucleus,mRNA processing,RNA splicing
LOC5571409	638.48	1.26715	0.162381	7.80352	6.0203e-15	5.56668e-14	AAEL009051	Thioredoxin Peroxidase. [Source:VB Community Annotation]	TPX5		GO:0004601,GO:0016209,GO:0016491,GO:0045454,GO:0051920,GO:0055114,GO:0098869	peroxidase activity,antioxidant activity,oxidoreductase activity,cell redox homeostasis,peroxiredoxin activity,oxidation-reduction process,cellular oxidant detoxification
LOC110675816	115.713	2.01485	0.258276	7.80116	6.13412e-15	5.66833e-14	AAEL022509				GO:0005515	protein binding
LOC5578743	3181.75	-1.11509	0.142986	-7.79859	6.26031e-15	5.78127e-14	AAEL003658	laminin beta-2 chain [Source:VB Community Annotation]			GO:0005604,GO:0016020	basement membrane,membrane
LOC5565588	941.217	-2.30005	0.295023	-7.79616	6.38185e-15	5.88979e-14	AAEL004870	cytochrome P450 [Source:VB Community Annotation]	CYP18A1		GO:0004497,GO:0005506,GO:0016020,GO:0016021,GO:0016491,GO:0016705,GO:0020037,GO:0046872,GO:0055114	monooxygenase activity,iron ion binding,membrane,integral component of membrane,oxidoreductase activity,oxidoreductase activity, acting on paired donors, with incorporation or reduction of molecular oxygen,heme binding,metal ion binding,oxidation-reduction process
LOC110678810	856.001	1.61263	0.206868	7.79547	6.4168e-15	5.9183e-14	AAEL026170	TAK1-associated binding protein 2 [Source:VB Community Annotation]	tab2		GO:0046872	metal ion binding
LOC5571915	596.69	1.76636	0.226631	7.79398	6.49323e-15	5.98501e-14	AAEL018177				GO:0003676,GO:0003723,GO:0003724,GO:0004386,GO:0005737,GO:0032574,GO:0032575,GO:0035194	nucleic acid binding,RNA binding,RNA helicase activity,helicase activity,cytoplasm,5'-3' RNA helicase activity,GO_0032575,post-transcriptional gene silencing by RNA
LOC5576220	1464.69	1.20258	0.154337	7.7919	6.60066e-15	6.08019e-14	AAEL002834	myo-inositol-1 phosphate synthase [Source:VB Community Annotation]			GO:0004512,GO:0006021,GO:0008654,GO:0016853	inositol-3-phosphate synthase activity,inositol biosynthetic process,phospholipid biosynthetic process,isomerase activity
LOC5580255	1065.39	1.00105	0.128475	7.7918	6.60607e-15	6.08134e-14	AAEL012588	Hsp70-interacting protein, putative [Source:VB Community Annotation]			GO:0004842,GO:0005515,GO:0016567	ubiquitin-protein transferase activity,protein binding,protein ubiquitination
LOC5579667	82.9194	-2.27134	0.291515	-7.79149	6.62251e-15	6.09263e-14	AAEL024317				GO:0003824,GO:0008484	catalytic activity,sulfuric ester hydrolase activity
LOC5563890	2765.19	-1.13738	0.14598	-7.79131	6.63195e-15	6.09747e-14	AAEL014212	androgen induced inhibitor of proliferation (as3) / pds5 [Source:VB Community Annotation]			GO:0005634,GO:0007049,GO:0007064,GO:0051301	nucleus,cell cycle,mitotic sister chromatid cohesion,cell division
LOC5567616	3918.32	-0.994607	0.127659	-7.79114	6.64056e-15	6.10154e-14	AAEL006196	hemomucin [Source:VB Community Annotation]			GO:0009058,GO:0016020,GO:0016021,GO:0016844	biosynthetic process,membrane,integral component of membrane,strictosidine synthase activity
LOC5568231	131.12	1.97524	0.253573	7.78962	6.72132e-15	6.17185e-14	AAEL006668				GO:0008080,GO:0016747	N-acetyltransferase activity,transferase activity, transferring acyl groups other than amino-acyl groups
LOC5567772	352.628	1.12287	0.144184	7.78772	6.82314e-15	6.26141e-14	AAEL000143				GO:0006807	nitrogen compound metabolic process
LOC110676045	35581.9	0.826805	0.106171	7.78745	6.83734e-15	6.2705e-14	AAEL022286	40S ribosomal protein S27 [Source:UniProtKB/TrEMBL;Acc:Q1HR58]			GO:0003735,GO:0005840,GO:0006412,GO:0046872	structural constituent of ribosome,ribosome,translation,metal ion binding
LOC110679345	66.2161	-2.73604	0.351351	-7.78719	6.8517e-15	6.2743e-14	AAEL021535
LOC110681158	66.2161	-2.73604	0.351351	-7.78719	6.8517e-15	6.2743e-14	AAEL024586
LOC110681299	113.343	2.19847	0.282321	7.78714	6.85438e-15	6.2743e-14	AAEL021010				GO:0006751,GO:0036374	glutathione catabolic process,glutathione hydrolase activity
LOC5570661	1519.36	-1.69472	0.21764	-7.78678	6.87387e-15	6.28819e-14	AAEL008478
LOC5571610	617.603	-2.66453	0.342192	-7.78666	6.88017e-15	6.29001e-14	AAEL009205				GO:0016020,GO:0016021,GO:0022857,GO:0055085	membrane,integral component of membrane,transmembrane transporter activity,transmembrane transport
LOC5572641	568.4	-1.79322	0.230514	-7.77921	7.29773e-15	6.66757e-14	AAEL001850				GO:0016020,GO:0016021	membrane,integral component of membrane
LOC5563827	2751.22	-0.965349	0.124182	-7.77366	7.62497e-15	6.96219e-14	AAEL014161	amino acids transporter [Source:VB Community Annotation]			GO:0016020,GO:0016021,GO:0022857,GO:0055085	membrane,integral component of membrane,transmembrane transporter activity,transmembrane transport
LOC5569910	43.7947	-4.30689	0.554229	-7.77095	7.7902e-15	7.10862e-14	AAEL021528
LOC5573396	326.674	1.14726	0.147653	7.76998	7.84955e-15	7.1583e-14	AAEL002051	sodium/hydrogen exchanger 7, 9 (nhe7, nhe9) [Source:VB Community Annotation]			GO:0005768,GO:0006811,GO:0006812,GO:0006814,GO:0006885,GO:0010008,GO:0015297,GO:0015299,GO:0015385,GO:0016020,GO:0016021,GO:0035725,GO:0055085,GO:1902600	endosome,ion transport,cation transport,sodium ion transport,regulation of pH,endosome membrane,antiporter activity,solute:proton antiporter activity,sodium:proton antiporter activity,membrane,integral component of membrane,sodium ion transmembrane transport,transmembrane transport,proton transmembrane transport
LOC5564717	433.61	-2.64881	0.341233	-7.76244	8.33087e-15	7.59249e-14	AAEL014589	reticulocalbin [Source:VB Community Annotation]			GO:0005509	calcium ion binding
LOC5564049	833.201	-1.04408	0.134506	-7.76228	8.34128e-15	7.59723e-14	AAEL004064	meiotic checkpoint regulator cut4 [Source:VB Community Annotation]			GO:0005680,GO:0007049,GO:0051301	anaphase-promoting complex,cell cycle,cell division
LOC23687393	3995.39	-0.655765	0.0845069	-7.75991	8.49923e-15	7.73626e-14	AAEL016973				GO:0005634	nucleus
LOC5567941	979.046	-1.21577	0.15676	-7.75559	8.79352e-15	7.99914e-14	AAEL025762				GO:0005737,GO:0005815,GO:0005856,GO:0007165,GO:0016301,GO:0016310,GO:0060090	cytoplasm,microtubule organizing center,cytoskeleton,signal transduction,kinase activity,phosphorylation,molecular adaptor activity
LOC5573001	2130.93	-0.722169	0.0931218	-7.7551	8.82741e-15	8.02497e-14	AAEL001935	CTL-like protein 1 [Source:UniProtKB/Swiss-Prot;Acc:Q17JQ7]			GO:0016020,GO:0016021	membrane,integral component of membrane
LOC5577642	349.291	-1.89744	0.244673	-7.75501	8.83369e-15	8.02567e-14	AAEL003213				GO:0006147,GO:0008270,GO:0008892,GO:0016787,GO:0016810,GO:0046872	guanine catabolic process,zinc ion binding,guanine deaminase activity,hydrolase activity,hydrolase activity, acting on carbon-nitrogen (but not peptide) bonds,metal ion binding
LOC5571917	765.472	1.70007	0.219308	7.75196	9.04874e-15	8.21594e-14	AAEL023532				GO:0003723,GO:0003724,GO:0004386,GO:0005737,GO:0032574,GO:0035194	RNA binding,RNA helicase activity,helicase activity,cytoplasm,5'-3' RNA helicase activity,post-transcriptional gene silencing by RNA
LOC5566168	1319.72	1.2005	0.154883	7.75099	9.1181e-15	8.27377e-14	AAEL019784				GO:0003682	chromatin binding
LOC5571419	2167.51	-0.675095	0.0871132	-7.74963	9.21624e-15	8.35762e-14	AAEL009068	dynamin [Source:VB Community Annotation]			GO:0000166,GO:0000266,GO:0003924,GO:0005525,GO:0005739,GO:0005741,GO:0005777,GO:0005794,GO:0005829,GO:0005905,GO:0008289,GO:0012505,GO:0016020,GO:0016559,GO:0016787,GO:0030054,GO:0030672,GO:0031410,GO:0045202,GO:0048511	nucleotide binding,mitochondrial fission,GTPase activity,GTP binding,mitochondrion,mitochondrial outer membrane,peroxisome,Golgi apparatus,cytosol,clathrin-coated pit,lipid binding,endomembrane system,membrane,peroxisome fission,hydrolase activity,cell junction,synaptic vesicle membrane,cytoplasmic vesicle,synapse,rhythmic process
LOC5573994	12601.7	-0.670473	0.0865192	-7.74942	9.23145e-15	8.36621e-14	AAEL010843				GO:0003743,GO:0006413	translation initiation factor activity,translational initiation
LOC5570258	1505.57	-0.800846	0.103346	-7.74914	9.2515e-15	8.37919e-14	AAEL008220
LOC5568959	273.029	1.70931	0.220679	7.74569	9.50663e-15	8.60491e-14	AAEL007250	Protein commissureless 2 homolog [Source:UniProtKB/TrEMBL;Acc:A0A2K7P6A6]			GO:0005886,GO:0007411,GO:0016020,GO:0016021	plasma membrane,axon guidance,membrane,integral component of membrane
LOC5568838	1473.47	-1.28351	0.165806	-7.74106	9.85926e-15	8.91857e-14	AAEL001169	ribosome biogenesis protein BOP1 homolog [Source:VB Community Annotation]			GO:0000463,GO:0000466,GO:0005515,GO:0005634,GO:0005654,GO:0005730,GO:0006364,GO:0030687,GO:0042254,GO:0042273,GO:0043021	maturation of LSU-rRNA from tricistronic rRNA transcript (SSU-rRNA, 5.8S rRNA, LSU-rRNA),maturation of 5.8S rRNA from tricistronic rRNA transcript (SSU-rRNA, 5.8S rRNA, LSU-rRNA),protein binding,nucleus,nucleoplasm,nucleolus,rRNA processing,preribosome, large subunit precursor,ribosome biogenesis,ribosomal large subunit biogenesis,ribonucleoprotein complex binding
LOC5571683	375.128	-2.30373	0.297692	-7.73862	1.005e-14	9.08548e-14	AAEL001639
LOC5571879	502.296	1.04911	0.135589	7.73746	1.01425e-14	9.16342e-14	AAEL009368	lipoic acid synthetase [Source:VB Community Annotation]			GO:0003824,GO:0005739,GO:0009107,GO:0009249,GO:0016740,GO:0016783,GO:0016992,GO:0046872,GO:0051536,GO:0051539,GO:0102552,GO:0102553	catalytic activity,mitochondrion,lipoate biosynthetic process,protein lipoylation,transferase activity,sulfurtransferase activity,lipoate synthase activity,metal ion binding,iron-sulfur cluster binding,4 iron, 4 sulfur cluster binding,lipoyl synthase activity (acting on glycine-cleavage complex H protein,lipoyl synthase activity (acting on pyruvate dehydrogenase E2 protein)
LOC5570819	1653.37	-1.41953	0.183548	-7.73384	1.04352e-14	9.42206e-14	AAEL008607	tep3 [Source:VB Community Annotation]			GO:0004866,GO:0005576,GO:0005615,GO:0010951	endopeptidase inhibitor activity,extracellular region,extracellular space,negative regulation of endopeptidase activity
LOC5563723	317.043	1.91566	0.247703	7.7337	1.04465e-14	9.42642e-14	AAEL003913	methionine-tRNA synthetase [Source:VB Community Annotation]			GO:0000166,GO:0004812,GO:0004825,GO:0005524,GO:0006412,GO:0006418,GO:0006431,GO:0016874	nucleotide binding,aminoacyl-tRNA ligase activity,methionine-tRNA ligase activity,ATP binding,translation,tRNA aminoacylation for protein translation,methionyl-tRNA aminoacylation,ligase activity
LOC110674038	476.119	-1.18013	0.152613	-7.73284	1.05171e-14	9.48421e-14	AAEL023845				GO:0005509,GO:0005886,GO:0007155,GO:0007156,GO:0016020	calcium ion binding,plasma membrane,cell adhesion,homophilic cell adhesion via plasma membrane adhesion molecules,membrane
LOC110681207	124.45	2.02638	0.262111	7.73099	1.0671e-14	9.61706e-14	AAEL025224				GO:0004672,GO:0004674,GO:0004703,GO:0005524,GO:0006468,GO:0007165	protein kinase activity,protein serine/threonine kinase activity,G protein-coupled receptor kinase activity,ATP binding,protein phosphorylation,signal transduction
LOC5570219	133.682	3.65589	0.472945	7.73006	1.07499e-14	9.68224e-14	AAEL024456
LOC5575161	200.968	2.31585	0.299672	7.72796	1.09284e-14	9.83692e-14	AAEL000354	dimeric dihydrodiol dehydrogenase [Source:VB Community Annotation]			GO:0016491,GO:0055114	oxidoreductase activity,oxidation-reduction process
LOC5571821	126.063	3.31524	0.429268	7.72301	1.13615e-14	1.02205e-13	AAEL001691	adenylate cyclase [Source:VB Community Annotation]			GO:0016020,GO:0016021,GO:0022857,GO:0055085	membrane,integral component of membrane,transmembrane transporter activity,transmembrane transport
LOC5570118	1026.06	-1.245	0.161223	-7.7222	1.14341e-14	1.02794e-13	AAEL008096	mitochondrial ornithine transporter [Source:VB Community Annotation]			GO:0016020,GO:0016021,GO:0022857	membrane,integral component of membrane,transmembrane transporter activity
LOC5566056	145.402	2.29065	0.296636	7.72211	1.14421e-14	1.02803e-13	AAEL005153
LOC5563948	481.67	1.06401	0.137793	7.72183	1.14674e-14	1.02967e-13	AAEL021054				GO:0004445,GO:0016311,GO:0046856	inositol-polyphosphate 5-phosphatase activity,dephosphorylation,phosphatidylinositol dephosphorylation
LOC5568593	551.385	-1.67048	0.216449	-7.71766	1.18482e-14	1.06303e-13	AAEL001104				GO:0003779,GO:0005515	actin binding,protein binding
LOC5563777	910.802	-2.07863	0.269336	-7.7176	1.18536e-14	1.06303e-13	AAEL019599				GO:0004672,GO:0005524,GO:0006468,GO:0016020,GO:0016021	protein kinase activity,ATP binding,protein phosphorylation,membrane,integral component of membrane
LOC5566173	260.979	-1.48298	0.192276	-7.71278	1.23103e-14	1.10332e-13	AAEL005230
LOC5566690	236.571	1.37276	0.178079	7.70874	1.27065e-14	1.13813e-13	AAEL005554
LOC110680590	53.2136	-6.08605	0.790206	-7.70185	1.34107e-14	1.20036e-13	AAEL022297				GO:0003824,GO:0009058,GO:0030170	catalytic activity,biosynthetic process,pyridoxal phosphate binding
LOC5576518	492.398	-2.48563	0.322734	-7.70179	1.34177e-14	1.20036e-13	AAEL012578	Phosphoserine aminotransferase [Source:UniProtKB/TrEMBL;Acc:Q1HRL1]			GO:0003824,GO:0004648,GO:0006564,GO:0008483,GO:0008652,GO:0016740	catalytic activity,O-phospho-L-serine:2-oxoglutarate aminotransferase activity,L-serine biosynthetic process,transaminase activity,cellular amino acid biosynthetic process,transferase activity
LOC5574502	1131.8	0.971985	0.126205	7.70166	1.34307e-14	1.20078e-13	AAEL002375	NBP2b protein, putative [Source:VB Community Annotation]
LOC5573934	926.599	-0.969443	0.125889	-7.70079	1.35231e-14	1.2083e-13	AAEL002186				GO:0008168	methyltransferase activity
LOC5565080	1218.6	1.89019	0.245546	7.69791	1.38313e-14	1.23508e-13	AAEL021750				GO:0005515	protein binding
LOC5576003	1288.79	-0.958682	0.124556	-7.69681	1.39504e-14	1.24495e-13	AAEL025078				GO:0000139,GO:0005198,GO:0005515,GO:0005643,GO:0005764,GO:0005765,GO:0015031,GO:0016192,GO:0030127,GO:0051028,GO:0090114,GO:1904263	Golgi membrane,structural molecule activity,protein binding,nuclear pore,lysosome,lysosomal membrane,protein transport,vesicle-mediated transport,COPII vesicle coat,mRNA transport,COPII-coated vesicle budding,positive regulation of TORC1 signaling
LOC5567410	317.362	-2.23907	0.29093	-7.69624	1.40123e-14	1.24972e-13	AAEL006069
LOC5567205	236.7	2.70164	0.351298	7.69045	1.46617e-14	1.30683e-13	AAEL000889	Carboxylic ester hydrolase [Source:UniProtKB/TrEMBL;Acc:A0A1S4EX56]			GO:0016787,GO:0052689	hydrolase activity,carboxylic ester hydrolase activity
LOC5568564	265.14	1.39945	0.182124	7.68408	1.54106e-14	1.37275e-13	AAEL001105	von Hippel-Lindau disease tumor suppressor, putative [Source:VB Community Annotation]
LOC5577342	2822.99	1.59635	0.207752	7.6839	1.54319e-14	1.37381e-13	AAEL000469				GO:0008270,GO:0016567,GO:0046872,GO:0061630	zinc ion binding,protein ubiquitination,metal ion binding,ubiquitin protein ligase activity
LOC5569546	420.904	1.97722	0.2574	7.6815	1.57238e-14	1.39847e-13	AAEL024345
LOC5569033	50.4737	-3.86033	0.502551	-7.68146	1.57282e-14	1.39847e-13	AAEL019963				GO:0004252,GO:0006508	serine-type endopeptidase activity,proteolysis
LOC110674766	279.068	1.65006	0.214887	7.67872	1.60691e-14	1.42791e-13	AAEL024429				GO:0003676	nucleic acid binding
LOC110674005	212.67	-1.41049	0.183707	-7.67789	1.61726e-14	1.43624e-13	AAEL014355	symbol, putative [Source:VB Community Annotation]			GO:0016020,GO:0016021	membrane,integral component of membrane
LOC5576044	273.522	1.27046	0.165505	7.67628	1.63779e-14	1.45359e-13	AAEL012273
LOC5572571	5368.14	0.968933	0.126236	7.67556	1.64692e-14	1.46081e-13	AAEL019534				GO:0003677,GO:0005634,GO:0006260	DNA binding,nucleus,DNA replication
LOC5572712	247.64	2.87436	0.374618	7.67279	1.6829e-14	1.49181e-13	AAEL009990
LOC5573627	955.644	-1.31746	0.171772	-7.6698	1.72264e-14	1.52525e-13	AAEL010619				GO:0000166,GO:0003777,GO:0005524,GO:0007018,GO:0008017	nucleotide binding,microtubule motor activity,ATP binding,microtubule-based movement,microtubule binding
LOC5569949	950.928	1.92144	0.250521	7.6698	1.72271e-14	1.52525e-13	AAEL008815				GO:0006629,GO:0016020,GO:0016021,GO:0016491,GO:0055114,GO:0080019,GO:0102965	lipid metabolic process,membrane,integral component of membrane,oxidoreductase activity,oxidation-reduction process,fatty-acyl-CoA reductase (alcohol-forming) activity,alcohol-forming fatty acyl-CoA reductase activity
LOC5566167	1889.82	-1.08148	0.141072	-7.66612	1.77284e-14	1.56867e-13	AAEL005238	mck1 [Source:VB Community Annotation]			GO:0000166,GO:0004672,GO:0004674,GO:0005524,GO:0005634,GO:0005737,GO:0006468,GO:0016301,GO:0016310,GO:0016740	nucleotide binding,protein kinase activity,protein serine/threonine kinase activity,ATP binding,nucleus,cytoplasm,protein phosphorylation,kinase activity,phosphorylation,transferase activity
LOC5568669	5104.69	-1.17824	0.153696	-7.66602	1.77409e-14	1.56884e-13	AAEL007007	DNA replication licensing factor MCM2 [Source:VB Community Annotation]			GO:0000166,GO:0003677,GO:0003678,GO:0004386,GO:0005524,GO:0005634,GO:0006260,GO:0006270,GO:0016787,GO:0032508,GO:0042555,GO:1905775	nucleotide binding,DNA binding,DNA helicase activity,helicase activity,ATP binding,nucleus,DNA replication,DNA replication initiation,hydrolase activity,DNA duplex unwinding,MCM complex,negative regulation of DNA helicase activity
LOC5568796	480.583	-2.18705	0.285363	-7.66408	1.80121e-14	1.59185e-13	AAEL028228				GO:0005912	adherens junction
LOC5577427	1670.8	1.39908	0.182667	7.65922	1.8707e-14	1.65227e-13	AAEL027111				GO:0004672,GO:0005524,GO:0006468,GO:0035556	protein kinase activity,ATP binding,protein phosphorylation,intracellular signal transduction
LOC110674882	115.961	1.85075	0.241754	7.65549	1.92574e-14	1.69985e-13	AAEL023911
LOC5576131	123.999	-2.24958	0.293868	-7.65504	1.93248e-14	1.70477e-13	AAEL002796	l-asparaginase i [Source:VB Community Annotation]			GO:0004067,GO:0005515,GO:0006520	asparaginase activity,protein binding,cellular amino acid metabolic process
LOC5578888	405.049	2.02076	0.264013	7.65401	1.94813e-14	1.71753e-13	AAEL019465				GO:0003779,GO:0005856,GO:0007015,GO:2000601	actin binding,cytoskeleton,actin filament organization,positive regulation of Arp2/3 complex-mediated actin nucleation
LOC5564589	467.47	1.09535	0.143114	7.65366	1.95333e-14	1.72108e-13	AAEL004345	cysteinyl-tRNA synthetase [Source:VB Community Annotation]			GO:0000166,GO:0004812,GO:0004817,GO:0005524,GO:0006412,GO:0006418,GO:0006423,GO:0016874,GO:0046872	nucleotide binding,aminoacyl-tRNA ligase activity,cysteine-tRNA ligase activity,ATP binding,translation,tRNA aminoacylation for protein translation,cysteinyl-tRNA aminoacylation,ligase activity,metal ion binding
LOC5567256	473.771	-1.24498	0.162745	-7.64987	2.01181e-14	1.77153e-13	AAEL029012				GO:0003712,GO:0005634,GO:0006357,GO:0016592,GO:0035556	transcription coregulator activity,nucleus,regulation of transcription by RNA polymerase II,mediator complex,intracellular signal transduction
LOC5565868	198.763	2.04382	0.267192	7.64925	2.02157e-14	1.77906e-13	AAEL015005				GO:0005634,GO:0008270,GO:0046872	nucleus,zinc ion binding,metal ion binding
LOC5577916	1031.26	1.72176	0.225096	7.64901	2.0254e-14	1.78135e-13	AAEL003343				GO:0005515,GO:0046872	protein binding,metal ion binding
LOC5572766	674.478	1.42313	0.186063	7.64864	2.03123e-14	1.7854e-13	AAEL023342	Putative mitochondrial solute carrier protein [Source:UniProtKB/TrEMBL;Acc:A0A0P6IUA4]			GO:0005347,GO:0015867,GO:0016020,GO:0016021,GO:0022857,GO:0055085	ATP transmembrane transporter activity,ATP transport,membrane,integral component of membrane,transmembrane transporter activity,transmembrane transport
LOC5567529	502.355	0.918053	0.120057	7.64679	2.06057e-14	1.8101e-13	AAEL006150	brca1-associated protein (brap2) [Source:VB Community Annotation]			GO:0003676,GO:0008270,GO:0046872	nucleic acid binding,zinc ion binding,metal ion binding
LOC110678495	437.436	-1.83106	0.239523	-7.6446	2.09593e-14	1.84006e-13	AAEL020467
LOC5578993	459.566	-1.72144	0.225221	-7.64334	2.11651e-14	1.857e-13	AAEL003794	homeobox protein nk-2 [Source:VB Community Annotation]			GO:0000981,GO:0003677,GO:0005634,GO:0006355,GO:0006357,GO:0043565	DNA-binding transcription factor activity, RNA polymerase II-specific,DNA binding,nucleus,regulation of transcription, DNA-templated,regulation of transcription by RNA polymerase II,sequence-specific DNA binding
LOC5571304	1515	-0.790203	0.103391	-7.64286	2.12455e-14	1.86294e-13	AAEL008953				GO:0003677,GO:0003700,GO:0006355,GO:0006357	DNA binding,DNA-binding transcription factor activity,regulation of transcription, DNA-templated,regulation of transcription by RNA polymerase II
LOC5577747	1238.85	-0.85488	0.111952	-7.63614	2.23839e-14	1.96158e-13	AAEL003293	GTP-binding protein [Source:VB Community Annotation]			GO:0000166,GO:0005525,GO:0005634,GO:0005730	nucleotide binding,GTP binding,nucleus,nucleolus
LOC5574895	660.728	0.886149	0.116053	7.63573	2.24548e-14	1.96662e-13	AAEL019416				GO:0008270,GO:0046872	zinc ion binding,metal ion binding
LOC5576836	339.23	1.33782	0.175328	7.63039	2.34054e-14	2.04864e-13	AAEL012818	Protein SYS1 homolog [Source:UniProtKB/TrEMBL;Acc:A0A1S4FXK3]			GO:0000139,GO:0005794,GO:0015031,GO:0016020,GO:0016021	Golgi membrane,Golgi apparatus,protein transport,membrane,integral component of membrane
LOC5570843	5389.78	-0.926353	0.121418	-7.62946	2.35732e-14	2.06209e-13	AAEL022467				GO:0000226,GO:0000281,GO:0005634,GO:0005737,GO:0005819,GO:0005874,GO:0040001	microtubule cytoskeleton organization,mitotic cytokinesis,nucleus,cytoplasm,spindle,microtubule,establishment of mitotic spindle localization
LOC5572106	2083.7	-0.920897	0.120864	-7.6193	2.55063e-14	2.22985e-13	AAEL026804				GO:0004177,GO:0004252,GO:0006508,GO:0008233,GO:0008236,GO:0008240,GO:0016787	aminopeptidase activity,serine-type endopeptidase activity,proteolysis,peptidase activity,serine-type peptidase activity,tripeptidyl-peptidase activity,hydrolase activity
LOC5577197	2358.13	-1.22068	0.160212	-7.61916	2.55338e-14	2.23092e-13	AAEL018255
LOC5570937	248.274	-1.9952	0.261894	-7.61836	2.5691e-14	2.24331e-13	AAEL019772
LOC5575243	1401.88	-0.830727	0.109082	-7.6156	2.62479e-14	2.29057e-13	AAEL011703	NAD kinase 2, mitochondrial [Source:UniProtKB/TrEMBL;Acc:Q16PA6]			GO:0000166,GO:0003951,GO:0005524,GO:0005739,GO:0006741,GO:0016301,GO:0016310,GO:0016740,GO:0019674,GO:0042803	nucleotide binding,NAD+ kinase activity,ATP binding,mitochondrion,NADP biosynthetic process,kinase activity,phosphorylation,transferase activity,NAD metabolic process,protein homodimerization activity
LOC110679583	1297.99	-2.47808	0.325402	-7.61544	2.62803e-14	2.29202e-13	AAEL023591
LOC5577284	1786.28	-1.69394	0.222532	-7.61213	2.69609e-14	2.34998e-13	AAEL013138				GO:0005515	protein binding
LOC5578596	3824	-0.775554	0.101909	-7.61027	2.73522e-14	2.38266e-13	AAEL013778	F-actin capping protein alpha [Source:VB Community Annotation]			GO:0003779,GO:0008290,GO:0051016,GO:0051693	actin binding,F-actin capping protein complex,barbed-end actin filament capping,actin filament capping
LOC110675165	47.5908	3.14957	0.413935	7.60884	2.7657e-14	2.40777e-13	AAEL021329
LOC5571827	294.903	-1.63073	0.214351	-7.60775	2.78906e-14	2.42666e-13	AAEL001696	paired box protein, putative [Source:VB Community Annotation]			GO:0000981,GO:0003677,GO:0005634,GO:0006355,GO:0006357,GO:0043565	DNA-binding transcription factor activity, RNA polymerase II-specific,DNA binding,nucleus,regulation of transcription, DNA-templated,regulation of transcription by RNA polymerase II,sequence-specific DNA binding
LOC5567995	503.75	1.21191	0.15931	7.60724	2.80021e-14	2.43491e-13	AAEL006437				GO:0003676,GO:0008270,GO:0046872	nucleic acid binding,zinc ion binding,metal ion binding
LOC5570366	211.471	2.40348	0.316002	7.60591	2.8291e-14	2.45857e-13	AAEL008274				GO:0005515	protein binding
LOC5564217	154.008	2.0976	0.27582	7.60496	2.84996e-14	2.47522e-13	AAEL021611	Putative cdc42 rho gtpase-activating protein [Source:UniProtKB/TrEMBL;Acc:A0A0P6JSQ8]
LOC5566648	2391.87	1.99441	0.262335	7.60252	2.90411e-14	2.52075e-13	AAEL019466	Mothers against decapentaplegic homolog [Source:UniProtKB/TrEMBL;Acc:A0A1S4FAT3]			GO:0003677,GO:0003700,GO:0005515,GO:0005634,GO:0005667,GO:0005737,GO:0006355,GO:0007179,GO:0046872	DNA binding,DNA-binding transcription factor activity,protein binding,nucleus,transcription regulator complex,cytoplasm,regulation of transcription, DNA-templated,transforming growth factor beta receptor signaling pathway,metal ion binding
LOC5573573	916.672	-1.76245	0.23191	-7.59972	2.96776e-14	2.57447e-13	AAEL002134				GO:0016020,GO:0016021	membrane,integral component of membrane
LOC5568863	512.968	-1.30348	0.171525	-7.59936	2.97589e-14	2.57999e-13	AAEL007156				GO:0016020,GO:0016021	membrane,integral component of membrane
[truncated: 17,577 more rows]
