# Supplementary material for: Engineered Antiviral Sensor Targets Infected Mosquitoes
Source: bioRxiv preprint, doi:10.1101/2023.01.27.525922, version 1 (2023-01-27)
Supplement: Table S14 [file 525922_file16.xlsx]

## Sheet: Sheet1
NCBI_ID	baseMean	log2FoldChange	lfcSE	stat	pvalue	padj	AAEL_ID	gene_description	gene_name	gene_synomym	GO_ID	GO_name
LOC110681151	1371.4	-7.55815	0.276797	-27.3058	3.62114e-164	2.43551e-160	AAEL022031
LOC5567504	1370.94	-7.55767	0.276795	-27.3042	3.7836e-164	2.43551e-160	AAEL024633
LOC110676566	737.558	-8.08761	0.402269	-20.105	6.67714e-90	2.86538e-86	AAEL020308
LOC5564713	36370.5	2.49737	0.134596	18.5546	7.48323e-77	2.40848e-73	AAEL014583	60S acidic ribosomal protein P2 [Source:UniProtKB/TrEMBL;Acc:Q1HRM9]	RpLP2		GO:0003735,GO:0005840,GO:0006414	structural constituent of ribosome,ribosome,translational elongation
LOC5565624	13612.7	1.61947	0.0902385	17.9466	5.10239e-72	1.31376e-68	AAEL014292	40S ribosomal protein S24 [Source:UniProtKB/TrEMBL;Acc:Q8WQK7]	RpS24		GO:0003735,GO:0005840,GO:0006412	structural constituent of ribosome,ribosome,translation
LOC5564514	316.47	7.05521	0.41265	17.0973	1.55341e-65	3.33311e-62	AAEL004292				GO:0042302	structural constituent of cuticle
LOC5566522	18189.6	1.74753	0.103438	16.8945	4.93834e-64	9.0823e-61	AAEL005451	60S ribosomal protein L38 [Source:UniProtKB/Swiss-Prot;Acc:Q1HRT4]	RpL38		GO:0003735,GO:0005840,GO:0006412	structural constituent of ribosome,ribosome,translation
LOC5580030	14954.6	1.48014	0.0878646	16.8457	1.12818e-63	1.81553e-60	AAEL009653	40S ribosomal protein S30 [Source:UniProtKB/TrEMBL;Acc:Q0IEK2]	RpS30		GO:0003735,GO:0005515,GO:0005840,GO:0006412	structural constituent of ribosome,protein binding,ribosome,translation
LOC5578122	2681.39	3.9306	0.233617	16.825	1.60152e-63	2.29088e-60	AAEL003425				GO:0003824,GO:0005515,GO:0005576,GO:0005975,GO:0006030,GO:0008061	catalytic activity,protein binding,extracellular region,carbohydrate metabolic process,chitin metabolic process,chitin binding
LOC5565962	10275.2	1.66416	0.099928	16.6536	2.85077e-62	3.67008e-59	AAEL005220	60S ribosomal protein L30 [Source:UniProtKB/TrEMBL;Acc:Q1HR35]	RpL30		GO:0003723,GO:0003735,GO:0005840,GO:0006412,GO:0022625	RNA binding,structural constituent of ribosome,ribosome,translation,cytosolic large ribosomal subunit
LOC5573217	9761.63	1.37068	0.0850484	16.1165	1.95495e-58	2.288e-55	AAEL010299	40S ribosomal protein S12 [Source:UniProtKB/TrEMBL;Acc:Q1HRM3]	RpS12		GO:0003735,GO:0005840,GO:0006412	structural constituent of ribosome,ribosome,translation
LOC5572968	65070.8	1.88327	0.117269	16.0594	4.91556e-58	5.27358e-55	AAEL010168	40S ribosomal protein S2 [Source:UniProtKB/TrEMBL;Acc:Q1HRV1]	RpS2		GO:0003723,GO:0003735,GO:0005840,GO:0006412,GO:0015935,GO:1990904	RNA binding,structural constituent of ribosome,ribosome,translation,small ribosomal subunit,ribonucleoprotein complex
LOC5577566	14914	1.70374	0.108097	15.7612	5.75482e-56	5.69905e-53	AAEL013272	60S ribosomal protein L37a [Source:VB Community Annotation]	RpL27a		GO:0003735,GO:0005840,GO:0006412	structural constituent of ribosome,ribosome,translation
LOC5571846	14077.2	1.36448	0.0875026	15.5936	8.04542e-55	7.39834e-52	AAEL023681
LOC5571927	22668.2	1.83845	0.119455	15.3903	1.90147e-53	1.63197e-50	AAEL020290	60S ribosomal protein L39 [Source:UniProtKB/TrEMBL;Acc:Q1HRB5]			GO:0003735,GO:0005840,GO:0006412	structural constituent of ribosome,ribosome,translation
LOC5574866	24219.4	1.44651	0.0950932	15.2115	2.96745e-52	2.38769e-49	AAEL011471	60S ribosomal protein L17 [Source:UniProtKB/Swiss-Prot;Acc:Q1HR65]	RpL17		GO:0003735,GO:0005840,GO:0006412,GO:0015934	structural constituent of ribosome,ribosome,translation,large ribosomal subunit
LOC5570108	23245.7	1.89998	0.125398	15.1515	7.40327e-52	5.60646e-49	AAEL020238				GO:0000028,GO:0003735,GO:0005737,GO:0005840,GO:0006412,GO:0015935,GO:0022627	ribosomal small subunit assembly,structural constituent of ribosome,cytoplasm,ribosome,translation,small ribosomal subunit,cytosolic small ribosomal subunit
LOC5573974	32965.3	2.04539	0.135106	15.1392	8.93228e-52	6.38856e-49	AAEL010821	60S ribosomal protein LP0 [Source:VB Community Annotation]	RpLP0		GO:0005840,GO:0042254	ribosome,ribosome biogenesis
LOC5565553	100675	2.61312	0.172768	15.125	1.10779e-51	7.50613e-49	AAEL022140
LOC5576215	21270.3	1.37896	0.0920259	14.9844	9.27962e-51	5.97329e-48	AAEL002832	40S ribosomal protein S26 [Source:UniProtKB/TrEMBL;Acc:Q1HQE4]	RpS26		GO:0003735,GO:0005840,GO:0006412	structural constituent of ribosome,ribosome,translation
LOC23687618	13844.4	1.50635	0.101642	14.8201	1.08592e-49	6.65721e-47	AAEL017198	Ribosomal protein L37 [Source:UniProtKB/TrEMBL;Acc:Q6Q9G1]			GO:0003723,GO:0003735,GO:0005840,GO:0006412,GO:0019843,GO:0046872	RNA binding,structural constituent of ribosome,ribosome,translation,rRNA binding,metal ion binding
LOC5577478	24030.9	1.58445	0.107503	14.7386	3.64062e-49	2.13043e-46	AAEL013221	60S ribosomal protein L10a [Source:VB Community Annotation]	RpL10a		GO:0003723,GO:0003735,GO:0005840,GO:0006412,GO:0015934	RNA binding,structural constituent of ribosome,ribosome,translation,large ribosomal subunit
LOC5563646	21368.3	1.43419	0.0975459	14.7027	6.18965e-49	3.46459e-46	AAEL021083	40S ribosomal protein S25 [Source:UniProtKB/TrEMBL;Acc:Q1HRL9]	RpS25		GO:0005840	ribosome
LOC5567848	22031.1	1.3884	0.0948583	14.6366	1.64039e-48	8.77985e-46	AAEL000987	60S ribosomal protein L8 [Source:VB Community Annotation]	RpL8		GO:0003735,GO:0005840,GO:0006412	structural constituent of ribosome,ribosome,translation
LOC5578104	392.162	3.44539	0.235438	14.634	1.70496e-48	8.77985e-46	AAEL003428				GO:0005515	protein binding
LOC110677919	18539.7	1.24592	0.0852014	14.6232	1.99843e-48	9.89529e-46	AAEL020749	60S ribosomal protein L15/L27 [Source:UniProtKB/TrEMBL;Acc:Q1HRP0]			GO:0003735,GO:0005840,GO:0006412,GO:0015934	structural constituent of ribosome,ribosome,translation,large ribosomal subunit
LOC110675989	643.151	1.80399	0.123409	14.618	2.15703e-48	1.02851e-45	AAEL025110
LOC5564054	450.748	-5.89807	0.4046	-14.5775	3.90296e-48	1.79453e-45	AAEL004048	UNC93A protein, putative [Source:VB Community Annotation]			GO:0016020,GO:0016021	membrane,integral component of membrane
LOC5576873	186.376	6.36497	0.437849	14.5369	7.07266e-48	3.13978e-45	AAEL003041				GO:0042302	structural constituent of cuticle
LOC110674122	6126.04	-1.83187	0.126268	-14.5078	1.08181e-47	4.64241e-45	AAEL027536	Putative alpha amylase catalytic domain family found in maltase [Source:UniProtKB/TrEMBL;Acc:A0A0P6IY06]			GO:0016020,GO:0016021	membrane,integral component of membrane
LOC5567053	1658.44	5.23069	0.360968	14.4907	1.38673e-47	5.75894e-45	AAEL005772	odorant binding protein OBP22 [Source:VB Community Annotation]	OBP22		GO:0005549	odorant binding
LOC5575105	23536.8	1.50945	0.104659	14.4225	3.73334e-47	1.50197e-44	AAEL011656	40S ribosomal protein S15 [Source:UniProtKB/TrEMBL;Acc:Q16PF7]	RpS15		GO:0003723,GO:0003735,GO:0005840,GO:0006412,GO:0015935	RNA binding,structural constituent of ribosome,ribosome,translation,small ribosomal subunit
LOC5569582	12602.6	1.42561	0.0995105	14.3262	1.50066e-46	5.85439e-44	AAEL007771	60S ribosomal protein L22 [Source:UniProtKB/TrEMBL;Acc:Q1HRP2]	RpL22		GO:0003735,GO:0005840,GO:0006412	structural constituent of ribosome,ribosome,translation
LOC110677764	19610.1	1.36066	0.0969687	14.0319	9.93828e-45	3.7631e-42	AAEL024434	60S ribosomal protein L13a (Fragment) [Source:UniProtKB/TrEMBL;Acc:Q1HR63]			GO:0003735,GO:0005840,GO:0006412,GO:0015934	structural constituent of ribosome,ribosome,translation,large ribosomal subunit
LOC5576673	1471.24	3.53747	0.252263	14.023	1.12817e-44	4.14974e-42	AAEL026023
LOC5566843	17574.8	1.38782	0.099058	14.0102	1.35059e-44	4.82986e-42	AAEL000823	60S ribosomal protein L35A, putative [Source:UniProtKB/TrEMBL;Acc:Q17N60]	Rpl35		GO:0003735,GO:0005840,GO:0006412	structural constituent of ribosome,ribosome,translation
LOC110675520	1096.81	4.90803	0.356654	13.7613	4.35505e-43	1.51532e-40	AAEL024417
LOC5566228	20934.5	1.60848	0.117504	13.6887	1.18628e-42	4.01901e-40	AAEL005266	40S ribosomal protein S14 [Source:UniProtKB/Swiss-Prot;Acc:Q1HR24]	RpS14		GO:0003674,GO:0003735,GO:0005575,GO:0005840,GO:0006412,GO:0008150	molecular_function,structural constituent of ribosome,cellular_component,ribosome,translation,biological_process
LOC5568465	20137.8	1.93899	0.141929	13.6617	1.71886e-42	5.67399e-40	AAEL006860	40S ribosomal protein S28 [Source:UniProtKB/TrEMBL;Acc:Q1HR28]	RpS28		GO:0003735,GO:0005840,GO:0006412	structural constituent of ribosome,ribosome,translation
LOC5577996	15259.8	1.70955	0.125281	13.6457	2.1417e-42	6.89306e-40	AAEL003396	60S ribosomal protein L32 [Source:UniProtKB/TrEMBL;Acc:Q1HR34]	RpL32	rp49	GO:0003735,GO:0005840,GO:0006412	structural constituent of ribosome,ribosome,translation
LOC5569949	870.57	2.04075	0.149585	13.6428	2.22984e-42	7.00169e-40	AAEL008815				GO:0006629,GO:0016020,GO:0016021,GO:0016491,GO:0055114,GO:0080019,GO:0102965	lipid metabolic process,membrane,integral component of membrane,oxidoreductase activity,oxidation-reduction process,fatty-acyl-CoA reductase (alcohol-forming) activity,alcohol-forming fatty acyl-CoA reductase activity
LOC5570243	18820.1	1.43727	0.106983	13.4346	3.79218e-41	1.16239e-38	AAEL008192	40S ribosomal protein S3 [Source:UniProtKB/TrEMBL;Acc:Q4F6X0]	RpS3		GO:0003723,GO:0003735,GO:0005840,GO:0006412,GO:0015935	RNA binding,structural constituent of ribosome,ribosome,translation,small ribosomal subunit
LOC5569670	14470.1	1.78744	0.133113	13.428	4.1468e-41	1.24153e-38	AAEL007824	40S ribosomal protein S29 [Source:UniProtKB/TrEMBL;Acc:Q1HRA1]	RpS29		GO:0003735,GO:0005783,GO:0005791,GO:0005829,GO:0005840,GO:0006412,GO:0008270	structural constituent of ribosome,endoplasmic reticulum,rough endoplasmic reticulum,cytosol,ribosome,translation,zinc ion binding
LOC5567070	21219.1	1.437	0.107305	13.3917	6.75729e-41	1.95306e-38	AAEL005817	60S ribosomal protein L26 [Source:UniProtKB/TrEMBL;Acc:Q178R6]	RpL26		GO:0003723,GO:0003735,GO:0005840,GO:0006412,GO:0015934	RNA binding,structural constituent of ribosome,ribosome,translation,large ribosomal subunit
LOC5574844	22330	1.10883	0.0828043	13.391	6.82675e-41	1.95306e-38	AAEL011447	60S ribosomal protein L14 [Source:UniProtKB/TrEMBL;Acc:Q1HRP1]	RpL14		GO:0003723,GO:0003735,GO:0005840,GO:0006412	RNA binding,structural constituent of ribosome,ribosome,translation
LOC5566404	408.745	-2.05414	0.153509	-13.3812	7.7845e-41	2.17864e-38	AAEL015151	acid phosphatase [Source:VB Community Annotation]
LOC5563788	1326.64	1.87291	0.140413	13.3386	1.38007e-40	3.78023e-38	AAEL003927				GO:0016020,GO:0016021	membrane,integral component of membrane
LOC5574485	22222.5	1.49795	0.114455	13.0877	3.86927e-39	1.03777e-36	AAEL002372	40S ribosomal protein S11 [Source:UniProtKB/TrEMBL;Acc:Q9GSB1]	RpS11		GO:0003735,GO:0005840,GO:0006412	structural constituent of ribosome,ribosome,translation
LOC5577309	13288	1.40559	0.107753	13.0445	6.82754e-39	1.79383e-36	AAEL019789	40S ribosomal protein S3a [Source:UniProtKB/Swiss-Prot;Acc:Q1HRR3]			GO:0003735,GO:0005737,GO:0005840,GO:0006412,GO:0022627	structural constituent of ribosome,cytoplasm,ribosome,translation,cytosolic small ribosomal subunit
LOC5578243	20823.9	1.51261	0.116904	12.9389	2.71587e-38	6.99282e-36	AAEL015006	60S ribosomal protein L23 (L17A)(AeRpL17A) [Source:VB Community Annotation]	RpL23		GO:0003735,GO:0005840,GO:0006412	structural constituent of ribosome,ribosome,translation
LOC110675493	14925.9	1.38622	0.107193	12.932	2.97013e-38	7.49754e-36	AAEL028043	60S ribosomal protein L28, putative [Source:UniProtKB/TrEMBL;Acc:Q1HRJ1]			GO:0003735,GO:0005840,GO:0006412	structural constituent of ribosome,ribosome,translation
LOC5566772	18413.1	1.49232	0.115438	12.9274	3.15374e-38	7.80794e-36	AAEL005629	60S ribosomal protein L35, putative [Source:VB Community Annotation]	RpL7a		GO:0003735,GO:0005840,GO:0006412	structural constituent of ribosome,ribosome,translation
LOC110676831	20421.8	1.7143	0.133276	12.8628	7.28985e-38	1.77074e-35	AAEL025362	60S ribosomal protein L10 [Source:UniProtKB/TrEMBL;Acc:Q1HRT6]
LOC5569035	463.32	2.23553	0.173998	12.8481	8.81906e-38	2.10253e-35	AAEL026700
LOC5569811	208.241	6.12133	0.476859	12.8368	1.02051e-37	2.38873e-35	AAEL001295
LOC5578811	1257.23	3.86324	0.3037	12.7206	4.54611e-37	1.04512e-34	AAEL013853	C-Type Lectin (CTL) - galactose binding. [Source:VB Community Annotation]	CTLGA2		GO:0030246	carbohydrate binding
LOC110675279	11664.8	-4.14517	0.326779	-12.6849	7.16863e-37	1.6191e-34	AAEL023797
LOC5578123	18984.2	1.27437	0.100923	12.6272	1.49476e-36	3.31785e-34	AAEL003427	40S ribosomal protein S16 [Source:UniProtKB/Swiss-Prot;Acc:P62251]	RpS16		GO:0003735,GO:0005840,GO:0006412	structural constituent of ribosome,ribosome,translation
LOC5577034	15921.6	1.2753	0.101414	12.5752	2.89171e-36	6.30981e-34	AAEL012944	60S ribosomal protein L11 [Source:UniProtKB/TrEMBL;Acc:Q16KL2]	RpL11		GO:0003735,GO:0005840,GO:0006412	structural constituent of ribosome,ribosome,translation
LOC5565839	9608.64	1.47772	0.11759	12.5667	3.21825e-36	6.90529e-34	AAEL005027	acidic ribosomal protein P1, putative [Source:VB Community Annotation]	RpLP1		GO:0003735,GO:0005840,GO:0006412,GO:0006414	structural constituent of ribosome,ribosome,translation,translational elongation
LOC5574993	23767.1	1.72364	0.137254	12.558	3.59373e-36	7.58453e-34	AAEL025362	60S ribosomal protein L10 [Source:UniProtKB/TrEMBL;Acc:Q1HRT6]			GO:0003735,GO:0005840,GO:0006412	structural constituent of ribosome,ribosome,translation
LOC5573827	22630.3	1.51093	0.120461	12.5429	4.34626e-36	9.0248e-34	AAEL010756	40S ribosomal protein S19 [Source:UniProtKB/TrEMBL;Acc:Q1HRR8]	RpS19		GO:0003735,GO:0005840,GO:0006412	structural constituent of ribosome,ribosome,translation
LOC5572365	14742.6	1.33151	0.106689	12.4802	9.57066e-36	1.95576e-33	AAEL009747	40S ribosomal protein S18 [Source:UniProtKB/TrEMBL;Acc:Q1HRL8]	RpS18		GO:0003676,GO:0003723,GO:0003735,GO:0005840,GO:0006412	nucleic acid binding,RNA binding,structural constituent of ribosome,ribosome,translation
LOC5569566	4466.77	1.44371	0.115923	12.454	1.32933e-35	2.67402e-33	AAEL007752	cytochrome c oxidase, subunit VIIA, putative [Source:VB Community Annotation]			GO:0004129,GO:0005739,GO:0005746,GO:0009055,GO:0016020,GO:0016021,GO:0022900,GO:1902600	cytochrome-c oxidase activity,mitochondrion,mitochondrial respirasome,electron transfer activity,membrane,integral component of membrane,electron transport chain,proton transmembrane transport
LOC5576188	1017.82	-3.6261	0.294265	-12.3226	6.84731e-35	1.35619e-32	AAEL012383	protein serine/threonine kinase, putative [Source:VB Community Annotation]			GO:0016301,GO:0016310	kinase activity,phosphorylation
LOC5573952	392.917	1.88594	0.153545	12.2827	1.12259e-34	2.18974e-32	AAEL002225	5-oxoprolyl-peptidase, putative [Source:VB Community Annotation]			GO:0005737,GO:0005829,GO:0006508,GO:0008233,GO:0008234,GO:0016787,GO:0016920	cytoplasm,cytosol,proteolysis,peptidase activity,cysteine-type peptidase activity,hydrolase activity,pyroglutamyl-peptidase activity
LOC5573224	1164.37	1.6518	0.135083	12.228	2.20349e-34	4.23398e-32	AAEL010315				GO:0005737,GO:0036158,GO:0046872	cytoplasm,outer dynein arm assembly,metal ion binding
LOC5578368	13134.6	1.46235	0.120066	12.1796	3.9927e-34	7.55913e-32	AAEL003530	acidic ribosomal protein P1, putative [Source:VB Community Annotation]	RpLP1		GO:0003735,GO:0005840,GO:0006412,GO:0006414	structural constituent of ribosome,ribosome,translation,translational elongation
LOC5575075	127.958	4.26192	0.350907	12.1455	6.06479e-34	1.13157e-31	AAEL011642				GO:0042302	structural constituent of cuticle
LOC5570465	7724.12	1.30654	0.107851	12.1143	8.86964e-34	1.63125e-31	AAEL026904
LOC5563786	10099.9	1.5332	0.127543	12.0211	2.75366e-33	4.99304e-31	AAEL003942	60S ribosomal protein L44 L41, putative [Source:VB Community Annotation]	RpL44		GO:0003735,GO:0005840,GO:0006412	structural constituent of ribosome,ribosome,translation
LOC5564226	8678.94	1.31945	0.10978	12.0191	2.82044e-33	5.04311e-31	AAEL004175	40S ribosomal protein S17 [Source:UniProtKB/TrEMBL;Acc:Q52UT2]	RpS17		GO:0003735,GO:0005840,GO:0006412	structural constituent of ribosome,ribosome,translation
LOC5568260	16583.1	1.38469	0.116579	11.8777	1.5452e-32	2.72506e-30	AAEL006698	60S ribosomal protein L31 [Source:UniProtKB/Swiss-Prot;Acc:Q9GN74]	RpL31		GO:0003735,GO:0005840,GO:0006412	structural constituent of ribosome,ribosome,translation
LOC5569531	13807.9	1.31986	0.111141	11.8756	1.58507e-32	2.75759e-30	AAEL007715	60S ribosomal protein L21 [Source:UniProtKB/TrEMBL;Acc:Q1HRN4]	RpL21		GO:0003735,GO:0005840,GO:0006412	structural constituent of ribosome,ribosome,translation
LOC110680939	6016.13	1.25531	0.106545	11.7819	4.83637e-32	8.3018e-30	AAEL025999	40S ribosomal protein S17 [Source:UniProtKB/TrEMBL;Acc:Q52UT2]
LOC5572470	7237.71	1.0532	0.0898618	11.7202	1.00422e-31	1.70109e-29	AAEL009825	60S ribosomal protein L13a [Source:UniProtKB/TrEMBL;Acc:Q16US7]	RpL13a		GO:0003735,GO:0005840,GO:0006412,GO:0015934	structural constituent of ribosome,ribosome,translation,large ribosomal subunit
LOC5580259	16473.8	1.24922	0.107068	11.6676	1.8665e-31	3.12069e-29	AAEL012585	60S ribosomal protein L7 [Source:UniProtKB/TrEMBL;Acc:Q1HR81]	RpL7		GO:0000463,GO:0003735,GO:0005840,GO:0022625	maturation of LSU-rRNA from tricistronic rRNA transcript (SSU-rRNA, 5.8S rRNA, LSU-rRNA),structural constituent of ribosome,ribosome,cytosolic large ribosomal subunit
LOC5570139	20151.5	1.29453	0.111188	11.6427	2.49983e-31	4.126e-29	AAEL008103	40S ribosomal protein S8 [Source:UniProtKB/TrEMBL;Acc:Q1HRQ9]	RpS8		GO:0003735,GO:0005840,GO:0006412	structural constituent of ribosome,ribosome,translation
LOC5564212	10383.8	1.39798	0.121178	11.5366	8.6242e-31	1.40542e-28	AAEL004151	60S ribosomal protein L29 [Source:UniProtKB/TrEMBL;Acc:Q1HRL5]			GO:0003735,GO:0005840,GO:0006412	structural constituent of ribosome,ribosome,translation
LOC5565261	804.407	-1.83535	0.159953	-11.4743	1.77591e-30	2.85788e-28	AAEL020830				GO:0000166,GO:0004672,GO:0004674,GO:0005524,GO:0006468,GO:0016301,GO:0016310	nucleotide binding,protein kinase activity,protein serine/threonine kinase activity,ATP binding,protein phosphorylation,kinase activity,phosphorylation
LOC5566227	2414.38	1.48698	0.129822	11.454	2.24543e-30	3.56885e-28	AAEL005254	dynactin P62 subunit [Source:VB Community Annotation]			GO:0005869	dynactin complex
LOC5570432	14275.8	1.19125	0.104234	11.4285	3.01115e-30	4.72751e-28	AAEL008329	60S ribosomal protein L24 [Source:UniProtKB/TrEMBL;Acc:Q1HR85]	RpL24		GO:0005840	ribosome
LOC5566959	34839.9	1.49254	0.130625	11.4261	3.09748e-30	4.80446e-28	AAEL005722	60S ribosomal protein L7a [Source:VB Community Annotation]	RpL26		GO:0003723,GO:0005840,GO:0022625,GO:0042254,GO:1990904	RNA binding,ribosome,cytosolic large ribosomal subunit,ribosome biogenesis,ribonucleoprotein complex
LOC5576190	263.849	3.95484	0.347701	11.3742	5.61879e-30	8.61147e-28	AAEL012381
LOC110676045	28650.5	1.51699	0.133817	11.3363	8.67575e-30	1.31402e-27	AAEL022286	40S ribosomal protein S27 [Source:UniProtKB/TrEMBL;Acc:Q1HR58]			GO:0003735,GO:0005840,GO:0006412,GO:0046872	structural constituent of ribosome,ribosome,translation,metal ion binding
LOC5564556	25469.5	1.1857	0.104617	11.3338	8.92724e-30	1.33639e-27	AAEL004325	60S ribosomal protein L5 [Source:UniProtKB/Swiss-Prot;Acc:Q1HQU2]	RpL5		GO:0003723,GO:0003735,GO:0005634,GO:0005737,GO:0005840,GO:0006412,GO:0008097,GO:0019843	RNA binding,structural constituent of ribosome,nucleus,cytoplasm,ribosome,translation,5S rRNA binding,rRNA binding
LOC5567163	24487	1.23752	0.109445	11.3073	1.20806e-29	1.78766e-27	AAEL005901	40S ribosomal protein S3a [Source:UniProtKB/Swiss-Prot;Acc:Q1HRR3]	RpS3a
LOC23687936	26365.8	1.03605	0.0919536	11.2671	1.90763e-29	2.79078e-27	AAEL017516				GO:0003723,GO:0003735,GO:0005840,GO:0006412,GO:0019843	RNA binding,structural constituent of ribosome,ribosome,translation,rRNA binding
LOC5577594	304.405	4.45838	0.396464	11.2454	2.4411e-29	3.53109e-27	AAEL013303
LOC5569529	19285.5	1.28353	0.11432	11.2275	2.98839e-29	4.27472e-27	AAEL007699	60S ribosomal protein L9 [Source:UniProtKB/TrEMBL;Acc:Q1HR72]	RpL9		GO:0003735,GO:0005840,GO:0006412,GO:0019843	structural constituent of ribosome,ribosome,translation,rRNA binding
LOC110678781	137.678	-3.34642	0.298211	-11.2217	3.19242e-29	4.5164e-27	AAEL024476				GO:0003677,GO:0046983	DNA binding,protein dimerization activity
LOC5580329	15399.3	1.20856	0.107727	11.2187	3.30131e-29	4.61968e-27	AAEL013069	guanine nucleotide-binding protein subunit beta-like protein [Source:VB Community Annotation]	Rack1		GO:0005515,GO:0016301,GO:0016310	protein binding,kinase activity,phosphorylation
LOC5567482	343.509	-4.54364	0.405949	-11.1926	4.43023e-29	6.13277e-27	AAEL019703				GO:0005515,GO:0016020,GO:0042802	protein binding,membrane,identical protein binding
CFI06_mgr02	175789	2.32002	0.209471	11.0756	1.64759e-28	2.2565e-26
LOC5579525	10263.6	1.02885	0.0938112	10.9673	5.49034e-28	7.44028e-26	AAEL014562	60S ribosomal protein L12 [Source:VB Community Annotation]	RpL12		GO:0003735,GO:0005840,GO:0006412	structural constituent of ribosome,ribosome,translation
LOC5576653	25761.6	1.25214	0.115108	10.878	1.46748e-27	1.96795e-25	AAEL012686	40S ribosomal protein S23 [Source:UniProtKB/TrEMBL;Acc:Q1HRM5]	RpS23		GO:0003735,GO:0005840,GO:0006412,GO:0015935	structural constituent of ribosome,ribosome,translation,small ribosomal subunit
LOC5573413	11972.7	1.12936	0.103879	10.8718	1.56985e-27	2.08353e-25	AAEL002047	40S ribosomal protein S10 [Source:UniProtKB/TrEMBL;Acc:Q1HR41]	RpS10		GO:0005840	ribosome
LOC110678198	2862.31	1.3407	0.123535	10.8528	1.93408e-27	2.54075e-25	AAEL028178				GO:0003735,GO:0005840,GO:0006412,GO:0015935	structural constituent of ribosome,ribosome,translation,small ribosomal subunit
LOC5569904	564.435	2.0911	0.192799	10.846	2.08275e-27	2.70842e-25	AAEL007997
LOC5579813	344.775	2.62509	0.243454	10.7827	4.15514e-27	5.34933e-25	AAEL005530				GO:0003824,GO:0005576,GO:0005975,GO:0006030,GO:0008061	catalytic activity,extracellular region,carbohydrate metabolic process,chitin metabolic process,chitin binding
LOC5572088	5909.83	1.17782	0.109317	10.7744	4.54912e-27	5.79855e-25	AAEL009506	40S ribosomal protein S20 [Source:UniProtKB/TrEMBL;Acc:Q1HRS9]	RpS20		GO:0003735,GO:0005840,GO:0006412,GO:0015935	structural constituent of ribosome,ribosome,translation,small ribosomal subunit
LOC110680475	5909.71	1.17792	0.109372	10.7698	4.77948e-27	6.03245e-25	AAEL020447	40S ribosomal protein S20 [Source:UniProtKB/TrEMBL;Acc:Q1HRS9]
LOC5578580	868.989	2.80636	0.261066	10.7496	5.94986e-27	7.43675e-25	AAEL013766				GO:0005576,GO:0006030,GO:0008061	extracellular region,chitin metabolic process,chitin binding
LOC5574166	467.873	2.16776	0.202404	10.7101	9.12961e-27	1.13014e-24	AAEL019623				GO:0007165	signal transduction
LOC5575780	699.33	3.51013	0.328665	10.68	1.26314e-26	1.54874e-24	AAEL002713	fibrinogen and fibronectin [Source:VB Community Annotation]
LOC5578313	21165.3	1.03005	0.0964689	10.6775	1.2965e-26	1.57464e-24	AAEL013625	40S ribosomal protein S5 [Source:UniProtKB/TrEMBL;Acc:Q1HRT9]	RpS5		GO:0003723,GO:0003735,GO:0005840,GO:0006412,GO:0015935	RNA binding,structural constituent of ribosome,ribosome,translation,small ribosomal subunit
LOC5566849	588.971	3.04393	0.285914	10.6463	1.81389e-26	2.18243e-24	AAEL024981				GO:0004806,GO:0005576,GO:0052689	triglyceride lipase activity,extracellular region,carboxylic ester hydrolase activity
LOC5578625	16015.2	1.20162	0.113375	10.5987	3.02225e-26	3.60264e-24	AAEL003582	40S ribosomal protein S13 [Source:UniProtKB/TrEMBL;Acc:Q5QC94]	RpS13		GO:0003735,GO:0005840,GO:0006412	structural constituent of ribosome,ribosome,translation
LOC5569637	380.324	3.2488	0.308435	10.5332	6.07642e-26	7.17687e-24	AAEL007778	leucine-rich transmembrane protein [Source:VB Community Annotation]			GO:0005515,GO:0016020,GO:0016021	protein binding,membrane,integral component of membrane
LOC5568090	11254.3	1.04479	0.0992137	10.5307	6.23449e-26	7.29662e-24	AAEL006511	ubiquitin [Source:VB Community Annotation]			GO:0003735,GO:0005515,GO:0005634,GO:0005737,GO:0005840,GO:0006412	structural constituent of ribosome,protein binding,nucleus,cytoplasm,ribosome,translation
LOC5575879	111.849	5.1557	0.490656	10.5078	7.9555e-26	9.22695e-24	AAEL026432
LOC5569095	183.668	2.72819	0.260321	10.4801	1.06634e-25	1.22572e-23	AAEL007364	7,8-dihydro-8-oxoguanine-triphosphatase, putative [Source:UniProtKB/TrEMBL;Acc:Q172L0]			GO:0016787	hydrolase activity
LOC5578156	8706.71	1.02604	0.0987005	10.3955	2.59848e-25	2.96043e-23	AAEL013536	ubiquitin (ribosomal protein L40) [Source:VB Community Annotation]			GO:0003735,GO:0005515,GO:0005840,GO:0006412,GO:0046872	structural constituent of ribosome,protein binding,ribosome,translation,metal ion binding
LOC5572940	10010.9	-1.37412	0.132217	-10.3929	2.67128e-25	3.01667e-23	AAEL019583				GO:0003676,GO:0003723,GO:0005515,GO:0007275	nucleic acid binding,RNA binding,protein binding,multicellular organism development
LOC5575037	15578.1	1.17709	0.113978	10.3273	5.3031e-25	5.9367e-23	AAEL011587	60S ribosomal protein L27, putative [Source:VB Community Annotation]	RpL27		GO:0003735,GO:0005840,GO:0006412	structural constituent of ribosome,ribosome,translation
LOC5576592	197.339	2.72496	0.264787	10.2912	7.72423e-25	8.57257e-23	AAEL002922	ionotropic receptor 8a [Source:VB Community Annotation]	Ir8a		GO:0004970,GO:0005216,GO:0005886,GO:0006811,GO:0015276,GO:0016020,GO:0016021,GO:0034220,GO:0035235,GO:0038023	ionotropic glutamate receptor activity,ion channel activity,plasma membrane,ion transport,ligand-gated ion channel activity,membrane,integral component of membrane,ion transmembrane transport,ionotropic glutamate receptor signaling pathway,signaling receptor activity
LOC5572284	20834.5	1.43958	0.140748	10.2281	1.48416e-24	1.63309e-22	AAEL001759	40S ribosomal protein S9 [Source:UniProtKB/TrEMBL;Acc:Q1HRP3]	RpS9		GO:0003723,GO:0003735,GO:0005840,GO:0006412,GO:0015935,GO:0019843	RNA binding,structural constituent of ribosome,ribosome,translation,small ribosomal subunit,rRNA binding
LOC5576062	246.105	2.69594	0.268174	10.0529	8.91601e-24	9.72752e-22	AAEL014333				GO:0005929,GO:0030030,GO:0042995	cilium,cell projection organization,cell projection
LOC5564126	1261.16	1.60388	0.160726	9.97898	1.884e-23	2.03821e-21	AAEL004097	enhancer of split protein, putative [Source:VB Community Annotation]			GO:0003677,GO:0005634,GO:0006355,GO:0046983	DNA binding,nucleus,regulation of transcription, DNA-templated,protein dimerization activity
LOC110676232	22405.8	1.1015	0.110686	9.95155	2.48274e-23	2.66356e-21	AAEL023983	40S ribosomal protein S4 [Source:UniProtKB/TrEMBL;Acc:Q1HRS6]			GO:0003723,GO:0003735,GO:0005840,GO:0006412,GO:0019843	RNA binding,structural constituent of ribosome,ribosome,translation,rRNA binding
LOC5573102	185.946	3.9624	0.400338	9.89763	4.26275e-23	4.53543e-21	AAEL010294	membrane-associated guanylate kinase (maguk) [Source:VB Community Annotation]			GO:0005515	protein binding
LOC110674120	917.431	-7.84914	0.793275	-9.8946	4.39346e-23	4.63618e-21	AAEL024267
LOC5578290	1518.18	-1.0655	0.107987	-9.86698	5.7883e-23	6.05842e-21	AAEL023159				GO:0005246,GO:0005515,GO:0006811,GO:0006816,GO:0016020,GO:0016021,GO:0046872	calcium channel regulator activity,protein binding,ion transport,calcium ion transport,membrane,integral component of membrane,metal ion binding
LOC5579919	6197.31	0.957687	0.0977482	9.79749	1.15423e-22	1.19835e-20	AAEL006785	60S ribosomal protein L18a [Source:UniProtKB/TrEMBL;Acc:Q174U3]	RpL18a		GO:0003735,GO:0005840,GO:0006412	structural constituent of ribosome,ribosome,translation
LOC110674018	6197.91	0.95724	0.0978078	9.78694	1.2811e-22	1.31943e-20	AAEL021422	60S ribosomal protein L18a [Source:UniProtKB/TrEMBL;Acc:Q174U3]			GO:0003735,GO:0005840,GO:0006412	structural constituent of ribosome,ribosome,translation
LOC110680514	314.165	-1.81335	0.186511	-9.72252	2.41716e-22	2.46972e-20	AAEL021052
LOC5566353	91.6011	5.44775	0.560895	9.71259	2.66476e-22	2.70127e-20	AAEL005336	d-3-phosphoglycerate dehydrogenase [Source:VB Community Annotation]			GO:0016491,GO:0016616,GO:0051287,GO:0055114	oxidoreductase activity,oxidoreductase activity, acting on the CH-OH group of donors, NAD or NADP as acceptor,NAD binding,oxidation-reduction process
LOC5569712	2587.98	-1.92856	0.199403	-9.67164	3.97932e-22	4.00233e-20	AAEL021145
LOC5571976	209.85	3.9221	0.40695	9.63778	5.53701e-22	5.52586e-20	AAEL009467				GO:0003779	actin binding
LOC5568528	3491.65	-1.02767	0.106874	-9.61568	6.86526e-22	6.79872e-20	AAEL018126
LOC5578124	197.064	3.87769	0.403377	9.61306	7.04273e-22	6.92123e-20	AAEL003419				GO:0003824,GO:0005515,GO:0005576,GO:0005975,GO:0006030,GO:0008061,GO:0016810	catalytic activity,protein binding,extracellular region,carbohydrate metabolic process,chitin metabolic process,chitin binding,hydrolase activity, acting on carbon-nitrogen (but not peptide) bonds
LOC5568305	119.135	2.7508	0.288251	9.54309	1.38638e-21	1.35128e-19	AAEL006723				GO:0005515	protein binding
LOC5575872	935.813	2.11408	0.221547	9.54237	1.396e-21	1.35128e-19	AAEL012138	24-dehydrocholesterol reductase [Source:VB Community Annotation]			GO:0005777,GO:0016020,GO:0016021,GO:0016491,GO:0050614,GO:0050660,GO:0055114,GO:0071949	peroxisome,membrane,integral component of membrane,oxidoreductase activity,delta24-sterol reductase activity,flavin adenine dinucleotide binding,oxidation-reduction process,FAD binding
LOC5569696	873.601	1.9141	0.20078	9.53335	1.52291e-21	1.46313e-19	AAEL007842				GO:0000139,GO:0005789,GO:0005794,GO:0005886,GO:0010008,GO:0016020,GO:0016021,GO:0016055,GO:0017147,GO:0042734,GO:0042995,GO:0045211	Golgi membrane,endoplasmic reticulum membrane,Golgi apparatus,plasma membrane,endosome membrane,membrane,integral component of membrane,Wnt signaling pathway,Wnt-protein binding,presynaptic membrane,cell projection,postsynaptic membrane
LOC5576642	4055.98	1.6929	0.177693	9.5271	1.61741e-21	1.54241e-19	AAEL012671				GO:0003700,GO:0006355	DNA-binding transcription factor activity,regulation of transcription, DNA-templated
LOC5572553	3063	-1.00244	0.105296	-9.52022	1.72809e-21	1.63584e-19	AAEL020592				GO:0005515,GO:0046872,GO:0046907	protein binding,metal ion binding,intracellular transport
LOC5576918	413.903	-1.51135	0.159724	-9.46226	3.0136e-21	2.82859e-19	AAEL012863	Predicted acetyltransferase [Source:UniProtKB/TrEMBL;Acc:Q1HR96]			GO:0008080,GO:0016740	N-acetyltransferase activity,transferase activity
LOC5571086	1427.44	3.10307	0.327964	9.46162	3.03204e-21	2.82859e-19	AAEL026403
LOC5572184	1223.38	-1.29325	0.136727	-9.45868	3.11869e-21	2.88849e-19	AAEL019431	ecdysone receptor [Source:VB Community Annotation]	EcR		GO:0003677,GO:0003700,GO:0003707,GO:0004879,GO:0005634,GO:0006355,GO:0008270,GO:0035076,GO:0035100,GO:0042025,GO:0043565,GO:0046872	DNA binding,DNA-binding transcription factor activity,steroid hormone receptor activity,nuclear receptor activity,nucleus,regulation of transcription, DNA-templated,zinc ion binding,ecdysone receptor-mediated signaling pathway,ecdysone binding,host cell nucleus,sequence-specific DNA binding,metal ion binding
LOC5578762	833.143	1.16574	0.123786	9.41738	4.62463e-21	4.25267e-19	AAEL003681
LOC5565979	15784.4	1.06936	0.113568	9.41603	4.68451e-21	4.27719e-19	AAEL005097	cold induced protein (BnC24A), putative [Source:VB Community Annotation]			GO:0003735,GO:0005840,GO:0006412	structural constituent of ribosome,ribosome,translation
LOC5575450	8634.18	0.981294	0.104274	9.41071	4.92793e-21	4.46776e-19	AAEL002639	60S ribosomal protein L36 [Source:UniProtKB/TrEMBL;Acc:Q17HK5]	Rpl36-2	Rpl36	GO:0003735,GO:0005840,GO:0006412	structural constituent of ribosome,ribosome,translation
LOC5566471	426.073	2.23127	0.237599	9.39088	5.94987e-21	5.35655e-19	AAEL005407	annexin x [Source:VB Community Annotation]			GO:0005509,GO:0005544	calcium ion binding,calcium-dependent phospholipid binding
LOC110675128	4008.55	1.8395	0.197318	9.32254	1.13583e-20	1.00925e-18	AAEL026302
LOC5568408	1215.61	2.35099	0.252186	9.32246	1.13672e-20	1.00925e-18	AAEL006829	microsomal glutathione s-transferase [Source:VB Community Annotation]			GO:0016020,GO:0016021	membrane,integral component of membrane
LOC5574467	69.1802	3.53464	0.38078	9.28263	1.65339e-20	1.45793e-18	AAEL002373	juvenile hormone-inducible protein, putative [Source:VB Community Annotation]
LOC110679049	5190.87	0.974322	0.105167	9.26455	1.95907e-20	1.70413e-18	AAEL024196
LOC5569724	5190.87	0.974322	0.105167	9.26455	1.95907e-20	1.70413e-18	AAEL007880	ornithine decarboxylase [Source:VB Community Annotation]			GO:0003824,GO:0006596	catalytic activity,polyamine biosynthetic process
LOC5570496	90.3448	3.11611	0.336608	9.25738	2.09514e-20	1.81025e-18	AAEL023787
LOC5565885	449.093	2.42337	0.262323	9.2381	2.50903e-20	2.15342e-18	AAEL000717	protocadherin [Source:VB Community Annotation]			GO:0005509,GO:0005886,GO:0007155,GO:0007156,GO:0016020	calcium ion binding,plasma membrane,cell adhesion,homophilic cell adhesion via plasma membrane adhesion molecules,membrane
LOC5567542	320.005	-2.48302	0.269384	-9.21743	3.04301e-20	2.59442e-18	AAEL006151	serine protease, putative [Source:VB Community Annotation]			GO:0004252,GO:0004553,GO:0005975,GO:0006508,GO:0008061,GO:0008152,GO:0016787,GO:0016798	serine-type endopeptidase activity,hydrolase activity, hydrolyzing O-glycosyl compounds,carbohydrate metabolic process,proteolysis,chitin binding,metabolic process,hydrolase activity,hydrolase activity, acting on glycosyl bonds
LOC5564405	182.14	2.55614	0.278221	9.18747	4.02197e-20	3.4065e-18	AAEL004229	glutathione transferase [Source:VB Community Annotation]	GSTT4		GO:0004364,GO:0005515	glutathione transferase activity,protein binding
LOC5566944	4822.7	-0.850092	0.0925933	-9.18092	4.27407e-20	3.59636e-18	AAEL005712	microtubule associated protein xmap215 [Source:VB Community Annotation]			GO:0005737	cytoplasm
LOC5570219	119.296	5.6909	0.621417	9.15794	5.28957e-20	4.42195e-18	AAEL024456
LOC110674250	100.56	-4.14462	0.452884	-9.15163	5.6079e-20	4.65782e-18	AAEL020427				GO:0003677,GO:0006355,GO:0043565	DNA binding,regulation of transcription, DNA-templated,sequence-specific DNA binding
LOC5574529	155.115	2.64543	0.289114	9.15011	5.68731e-20	4.69349e-18	AAEL011206	aminoacylase, putative [Source:VB Community Annotation]			GO:0004046,GO:0005737,GO:0006520,GO:0016787	aminoacylase activity,cytoplasm,cellular amino acid metabolic process,hydrolase activity
LOC5572884	12614.6	-4.87076	0.533306	-9.13315	6.65359e-20	5.45595e-18	AAEL013506	fibrinogen and fibronectin [Source:VB Community Annotation]
LOC5565617	294.881	1.58057	0.173422	9.114	7.94009e-20	6.46967e-18	AAEL004868	hemomucin [Source:VB Community Annotation]			GO:0009058,GO:0016844	biosynthetic process,strictosidine synthase activity
LOC5571775	572.525	1.52851	0.168511	9.07068	1.18278e-19	9.57678e-18	AAEL009291	retinoid-inducible serine carboxypeptidase (serine carboxypeptidase [Source:VB Community Annotation]			GO:0004180,GO:0004185,GO:0006508,GO:0008233,GO:0016787	carboxypeptidase activity,serine-type carboxypeptidase activity,proteolysis,peptidase activity,hydrolase activity
LOC5573683	11907.1	1.62413	0.179088	9.06887	1.20258e-19	9.67624e-18	AAEL010664	actin binding protein, putative [Source:VB Community Annotation]			GO:0046872	metal ion binding
LOC110677813	154.082	2.39363	0.264106	9.06314	1.26754e-19	1.00987e-17	AAEL024098				GO:0005634	nucleus
LOC5567467	310.37	-1.68759	0.18621	-9.06286	1.27078e-19	1.00987e-17	AAEL000967	tmc7 protein [Source:VB Community Annotation]			GO:0005887,GO:0016020,GO:0016021	integral component of plasma membrane,membrane,integral component of membrane
LOC5579417	233.047	2.76267	0.305281	9.0496	1.43496e-19	1.13336e-17	AAEL015458	transferrin [Source:VB Community Annotation]	Tf1		GO:0005576,GO:0005615,GO:0006811,GO:0046872,GO:0055072	extracellular region,extracellular space,ion transport,metal ion binding,iron ion homeostasis
LOC5577691	102.738	4.46467	0.493766	9.04209	1.53704e-19	1.20658e-17	AAEL013327
LOC5566856	80.5211	3.85572	0.428348	9.00137	2.22927e-19	1.73937e-17	AAEL000797	dimethylaniline monooxygenase [Source:VB Community Annotation]			GO:0004497,GO:0004499,GO:0016491,GO:0050660,GO:0050661,GO:0055114	monooxygenase activity,N,N-dimethylaniline monooxygenase activity,oxidoreductase activity,flavin adenine dinucleotide binding,NADP binding,oxidation-reduction process
LOC110677182	2000.49	1.14283	0.127618	8.95508	3.3949e-19	2.63289e-17	AAEL020737	40S ribosomal protein S21 [Source:UniProtKB/TrEMBL;Acc:Q1HR25]
LOC110677685	1525.1	1.1091	0.123938	8.94879	3.59416e-19	2.77073e-17	AAEL023769				GO:0003735,GO:0005840,GO:0006412	structural constituent of ribosome,ribosome,translation
LOC5564268	1883.24	1.97314	0.220672	8.94154	3.83795e-19	2.94106e-17	AAEL014366
LOC5564016	464.992	-6.49994	0.727355	-8.93641	4.02e-19	3.06234e-17	AAEL014277				GO:0000981,GO:0003677,GO:0005634,GO:0006355,GO:0006357,GO:0043565	DNA-binding transcription factor activity, RNA polymerase II-specific,DNA binding,nucleus,regulation of transcription, DNA-templated,regulation of transcription by RNA polymerase II,sequence-specific DNA binding
LOC5578864	336.165	2.2058	0.248251	8.88538	6.36998e-19	4.82395e-17	AAEL015450	ribonuclease UK114, putative [Source:VB Community Annotation]
LOC5576079	1052.07	0.992868	0.112299	8.84131	9.46015e-19	7.12222e-17	AAEL012317	MICOS complex subunit MIC13 [Source:UniProtKB/TrEMBL;Acc:Q1HRM0]			GO:0005739,GO:0005743,GO:0016020,GO:0016021,GO:0061617	mitochondrion,mitochondrial inner membrane,membrane,integral component of membrane,MICOS complex
LOC5576142	997.312	-1.20822	0.136829	-8.83016	1.04529e-18	7.82386e-17	AAEL012337	goliath E3 ubiquitin ligase [Source:VB Community Annotation]			GO:0016020,GO:0016021,GO:0046872	membrane,integral component of membrane,metal ion binding
CFI06_mgt19	1465.44	2.31484	0.262317	8.82459	1.09859e-18	8.17531e-17
LOC5573879	1577.49	0.989317	0.112469	8.79632	1.41374e-18	1.04601e-16	AAEL010801	Cytochrome b-c1 complex subunit 6 [Source:UniProtKB/TrEMBL;Acc:Q1HR18]			GO:0005739,GO:0005743,GO:0006122,GO:0008121,GO:0016020,GO:0055114,GO:0070469	mitochondrion,mitochondrial inner membrane,mitochondrial electron transport, ubiquinol to cytochrome c,ubiquinol-cytochrome-c reductase activity,membrane,oxidation-reduction process,respirasome
LOC5570675	20264.8	1.01454	0.115701	8.7686	1.80898e-18	1.33079e-16	AAEL008481	60S ribosomal protein L18 [Source:UniProtKB/Swiss-Prot;Acc:Q1HR62]	RpL18		GO:0003735,GO:0005737,GO:0005840,GO:0006412	structural constituent of ribosome,cytoplasm,ribosome,translation
LOC5564931	1911.52	1.09413	0.124915	8.75895	1.97082e-18	1.44161e-16	AAEL000529	40S ribosomal protein S21 [Source:UniProtKB/TrEMBL;Acc:Q1HR25]	RpS21		GO:0003735,GO:0005737,GO:0005783,GO:0005791,GO:0005829,GO:0005840,GO:0006412	structural constituent of ribosome,cytoplasm,endoplasmic reticulum,rough endoplasmic reticulum,cytosol,ribosome,translation
LOC5576758	13298.1	1.0789	0.123204	8.75704	2.00444e-18	1.45792e-16	AAEL025553				GO:0003735,GO:0005840,GO:0006412	structural constituent of ribosome,ribosome,translation
LOC5567125	366.497	2.36438	0.270818	8.7305	2.53546e-18	1.83379e-16	AAEL005882
LOC110678100	244.492	-3.60819	0.414032	-8.71476	2.91365e-18	2.09555e-16	AAEL020632
LOC5579186	17868.3	0.854694	0.0982327	8.7007	3.2983e-18	2.35902e-16	AAEL003872	translationally-controlled tumor protein homolog (TCTP) [Source:VB Community Annotation]	Tctp		GO:0005737	cytoplasm
LOC5571564	16511.4	1.02738	0.118929	8.63865	5.68788e-18	4.04562e-16	AAEL009151	40S ribosomal protein S15a [Source:VB Community Annotation]	RpS15a		GO:0003735,GO:0005840,GO:0006412	structural constituent of ribosome,ribosome,translation
LOC5567349	1038.7	-1.08135	0.125215	-8.63593	5.8249e-18	4.12031e-16	AAEL006032				GO:0003677,GO:0005634,GO:0005737,GO:0008270,GO:0046872	DNA binding,nucleus,cytoplasm,zinc ion binding,metal ion binding
LOC110677652	425.323	-1.40671	0.163119	-8.62383	6.47534e-18	4.55538e-16	AAEL024341
LOC5572647	188.28	3.26979	0.380013	8.60443	7.66948e-18	5.36613e-16	AAEL001851
LOC5565534	1233.21	-1.20117	0.139638	-8.602	7.83387e-18	5.45153e-16	AAEL019740				GO:0005634,GO:0046872	nucleus,metal ion binding
LOC5573240	199.048	2.57261	0.30004	8.5742	9.97785e-18	6.90617e-16	AAEL011858	transcription factor IIIA, putative [Source:VB Community Annotation]			GO:0003676,GO:0005634,GO:0008270,GO:0046872	nucleic acid binding,nucleus,zinc ion binding,metal ion binding
LOC5572120	864.763	-1.27449	0.149916	-8.50134	1.8741e-17	1.29022e-15	AAEL009533				GO:0005515,GO:0005634,GO:0016567	protein binding,nucleus,protein ubiquitination
LOC110677038	145.174	-2.84914	0.336669	-8.46274	2.61172e-17	1.78847e-15	AAEL024275
LOC5578155	16741	0.812504	0.0960395	8.4601	2.67143e-17	1.81968e-15	AAEL013533				GO:0005634,GO:0005730,GO:0006364	nucleus,nucleolus,rRNA processing
LOC5575764	55.0228	3.91311	0.4628	8.45529	2.78386e-17	1.88629e-15	AAEL002720	Serine Protease Inhibitor (serpin) likely cleavage at V/V. [Source:VB Community Annotation]	SRPN20		GO:0004867,GO:0005615,GO:0010466,GO:0010951,GO:0030414	serine-type endopeptidase inhibitor activity,extracellular space,negative regulation of peptidase activity,negative regulation of endopeptidase activity,peptidase inhibitor activity
LOC5573864	1205.52	1.14843	0.136352	8.42255	3.68392e-17	2.48308e-15	AAEL010788	metalloprotease [Source:VB Community Annotation]			GO:0004222,GO:0006508,GO:0008233,GO:0008237,GO:0008270,GO:0016787,GO:0046872	metalloendopeptidase activity,proteolysis,peptidase activity,metallopeptidase activity,zinc ion binding,hydrolase activity,metal ion binding
LOC5575074	68.4866	3.36302	0.40014	8.40462	4.29254e-17	2.87824e-15	AAEL011639	WAP four-disulfide core domain protein 2 precursor, putative [Source:VB Community Annotation]			GO:0005576,GO:0010466,GO:0030414	extracellular region,negative regulation of peptidase activity,peptidase inhibitor activity
LOC110676806	152.502	4.65855	0.555114	8.39207	4.77656e-17	3.16977e-15	AAEL021948
LOC5574415	152.502	4.65855	0.555114	8.39207	4.77656e-17	3.16977e-15	AAEL026239
LOC5571379	1136.04	-1.03526	0.124011	-8.34807	6.93849e-17	4.55887e-15	AAEL026486				GO:0000166,GO:0004016,GO:0005524,GO:0005886,GO:0006171,GO:0009190,GO:0016020,GO:0016021,GO:0016829,GO:0016849,GO:0035556,GO:0046872	nucleotide binding,adenylate cyclase activity,ATP binding,plasma membrane,cAMP biosynthetic process,cyclic nucleotide biosynthetic process,membrane,integral component of membrane,lyase activity,phosphorus-oxygen lyase activity,intracellular signal transduction,metal ion binding
LOC5574784	152.251	2.98086	0.357073	8.34804	6.94065e-17	4.55887e-15	AAEL011421	multiple inositol polyphosphate phosphatase [Source:VB Community Annotation]			GO:0004446,GO:0016311,GO:0016791,GO:0034417,GO:0052826	inositol-hexakisphosphate phosphatase activity,dephosphorylation,phosphatase activity,bisphosphoglycerate 3-phosphatase activity,inositol hexakisphosphate 2-phosphatase activity
LOC5566023	3250.16	-1.05186	0.126043	-8.34523	7.10755e-17	4.6448e-15	AAEL019551
LOC110681558	322.619	2.71081	0.325563	8.32651	8.32589e-17	5.41351e-15	AAEL004564
LOC5565449	159.774	2.35488	0.283547	8.3051	9.97357e-17	6.45225e-15	AAEL000642	alpha-amylase [Source:VB Community Annotation]			GO:0003824,GO:0005975,GO:0008152,GO:0016798	catalytic activity,carbohydrate metabolic process,metabolic process,hydrolase activity, acting on glycosyl bonds
LOC5569898	1128.35	1.12082	0.135689	8.26019	1.45441e-16	9.36206e-15	AAEL008002	mitochondrial NADH:ubiquinone oxidoreductase ESSS subunit, putative [Source:VB Community Annotation]			GO:0005739,GO:0016020,GO:0016021	mitochondrion,membrane,integral component of membrane
LOC5568049	329.384	2.29137	0.277838	8.24715	1.62213e-16	1.03897e-14	AAEL006496	steroid dehydrogenase [Source:VB Community Annotation]			GO:0016020,GO:0016021,GO:0016491,GO:0055114	membrane,integral component of membrane,oxidoreductase activity,oxidation-reduction process
LOC110680234	245.438	-1.95649	0.237388	-8.24173	1.69733e-16	1.08175e-14	AAEL026780
LOC5564491	216.258	1.84281	0.224156	8.2211	2.0165e-16	1.27884e-14	AAEL004276				GO:0005737	cytoplasm
LOC5570648	1177.05	1.43429	0.174669	8.21147	2.18495e-16	1.37888e-14	AAEL008468	cysteine synthase [Source:VB Community Annotation]			GO:0004122,GO:0005737,GO:0006535,GO:0008652,GO:0016829,GO:0019343,GO:0019344	cystathionine beta-synthase activity,cytoplasm,cysteine biosynthetic process from serine,cellular amino acid biosynthetic process,lyase activity,cysteine biosynthetic process via cystathionine,cysteine biosynthetic process
LOC5571084	736.829	2.2297	0.271643	8.20819	2.24544e-16	1.41013e-14	AAEL008789	apolipophorin-III, putative [Source:VB Community Annotation]			GO:0005576,GO:0006869,GO:0008289	extracellular region,lipid transport,lipid binding
LOC5576416	448.547	2.71437	0.330827	8.2048	2.30979e-16	1.4435e-14	AAEL012509	Carboxylic ester hydrolase [Source:UniProtKB/TrEMBL;Acc:A0A1S4FWG0]			GO:0016787,GO:0052689	hydrolase activity,carboxylic ester hydrolase activity
LOC5575898	1919.05	1.08097	0.13184	8.19909	2.4221e-16	1.50638e-14	AAEL002737	cytochrome c oxidase, subunit VIIC, putative [Source:VB Community Annotation]			GO:0004129,GO:0005739,GO:0005743,GO:0006119,GO:0016020,GO:0016021,GO:0022900,GO:1902600	cytochrome-c oxidase activity,mitochondrion,mitochondrial inner membrane,oxidative phosphorylation,membrane,integral component of membrane,electron transport chain,proton transmembrane transport
LOC5577651	59.947	3.05624	0.372859	8.19678	2.46909e-16	1.52822e-14	AAEL019558
LOC5573084	392.582	3.20499	0.391186	8.19301	2.54783e-16	1.56941e-14	AAEL010276	aminomethyltransferase [Source:VB Community Annotation]			GO:0004047,GO:0005515,GO:0005739,GO:0006546,GO:0008483,GO:0016740	aminomethyltransferase activity,protein binding,mitochondrion,glycine catabolic process,transaminase activity,transferase activity
LOC5563686	1282.6	1.06138	0.130081	8.15933	3.36891e-16	2.0653e-14	AAEL000529	40S ribosomal protein S21 [Source:UniProtKB/TrEMBL;Acc:Q1HR25]	RpS21
LOC5574416	128.603	4.2846	0.525427	8.1545	3.50623e-16	2.1393e-14	AAEL023088
LOC5568262	1108.81	2.11305	0.259712	8.13613	4.0812e-16	2.47837e-14	AAEL006690	ribbon [Source:VB Community Annotation]			GO:0003677,GO:0005515,GO:0005634	DNA binding,protein binding,nucleus
LOC5568027	160.441	2.55318	0.31432	8.12285	4.5537e-16	2.75232e-14	AAEL024438				GO:0005794,GO:0008376,GO:0016020,GO:0016021,GO:0016740,GO:0032580	Golgi apparatus,acetylgalactosaminyltransferase activity,membrane,integral component of membrane,transferase activity,Golgi cisterna membrane
LOC5568362	50.6036	4.12589	0.508152	8.11942	4.68425e-16	2.81799e-14	AAEL001098	clip-domain serine protease, putative [Source:VB Community Annotation]			GO:0004252,GO:0006508	serine-type endopeptidase activity,proteolysis
LOC5578168	514.13	-1.29213	0.159373	-8.10758	5.16363e-16	3.09193e-14	AAEL013561
LOC23687777	8853.29	-1.19219	0.147272	-8.09513	5.7203e-16	3.40941e-14	AAEL017357				GO:0004842,GO:0005634,GO:0005654,GO:0006281,GO:0006974,GO:0008270,GO:0016567	ubiquitin-protein transferase activity,nucleus,nucleoplasm,DNA repair,cellular response to DNA damage stimulus,zinc ion binding,protein ubiquitination
LOC5577489	1284.06	1.63091	0.202067	8.07115	6.96402e-16	4.13156e-14	AAEL013229	Tubulin alpha chain [Source:UniProtKB/TrEMBL;Acc:Q16JS3]			GO:0000166,GO:0003924,GO:0005200,GO:0005525,GO:0005737,GO:0005874,GO:0007010,GO:0007017	nucleotide binding,GTPase activity,structural constituent of cytoskeleton,GTP binding,cytoplasm,microtubule,cytoskeleton organization,microtubule-based process
LOC5572696	2818.9	0.968901	0.120286	8.05497	7.95005e-16	4.69491e-14	AAEL009964				GO:0000276,GO:0005739,GO:0005743,GO:0006754,GO:0006811,GO:0015078,GO:0015986,GO:0016020,GO:0045263	mitochondrial proton-transporting ATP synthase complex, coupling factor F(o),mitochondrion,mitochondrial inner membrane,ATP biosynthetic process,ion transport,proton transmembrane transporter activity,ATP synthesis coupled proton transport,membrane,proton-transporting ATP synthase complex, coupling factor F(o)
LOC110677012	1201.83	-5.2775	0.657201	-8.03027	9.72551e-16	5.71718e-14	AAEL021281
LOC5567596	754.772	-0.976054	0.121641	-8.02406	1.0231e-15	5.98701e-14	AAEL006209	exonuclease [Source:VB Community Annotation]			GO:0003677,GO:0003824,GO:0004518,GO:0004519,GO:0005634,GO:0006281,GO:0006974,GO:0016787,GO:0016788,GO:0035312,GO:0046872,GO:0090305	DNA binding,catalytic activity,nuclease activity,endonuclease activity,nucleus,DNA repair,cellular response to DNA damage stimulus,hydrolase activity,hydrolase activity, acting on ester bonds,5'-3' exodeoxyribonuclease activity,metal ion binding,nucleic acid phosphodiester bond hydrolysis
LOC5570244	23067.3	0.942665	0.117506	8.02227	1.03806e-15	6.04706e-14	AAEL008188	60S ribosomal protein L6 [Source:UniProtKB/TrEMBL;Acc:Q16ZH3]	RpL6		GO:0003735,GO:0005840,GO:0006412	structural constituent of ribosome,ribosome,translation
LOC5563768	1143.95	-0.85237	0.106472	-8.00561	1.18876e-15	6.89373e-14	AAEL019626				GO:0004672,GO:0005524,GO:0006468	protein kinase activity,ATP binding,protein phosphorylation
LOC5564782	1925.72	1.26172	0.157641	8.00379	1.20643e-15	6.96483e-14	AAEL004427	Prefoldin subunit 3 [Source:UniProtKB/TrEMBL;Acc:Q17CV4]			GO:0006457,GO:0016272	protein folding,prefoldin complex
LOC5573039	1150.97	-1.20411	0.150645	-7.99301	1.31679e-15	7.56801e-14	AAEL021387				GO:0005634	nucleus
LOC5578176	126.381	2.21422	0.277514	7.97875	1.47824e-15	8.45815e-14	AAEL013548				GO:0003676,GO:0003700,GO:0005634,GO:0006355,GO:0008270,GO:0046872	nucleic acid binding,DNA-binding transcription factor activity,nucleus,regulation of transcription, DNA-templated,zinc ion binding,metal ion binding
LOC5570947	647.105	-1.30088	0.163279	-7.96721	1.62298e-15	9.24522e-14	AAEL008679	Alpha-tubulin N-acetyltransferase [Source:UniProtKB/TrEMBL;Acc:A0A2K7P6B5]			GO:0005874,GO:0016740,GO:0016746,GO:0019799,GO:0048666,GO:0070507,GO:0071929	microtubule,transferase activity,transferase activity, transferring acyl groups,tubulin N-acetyltransferase activity,neuron development,regulation of microtubule cytoskeleton organization,alpha-tubulin acetylation
LOC5577711	448.091	2.7066	0.339997	7.96067	1.7111e-15	9.70429e-14	AAEL013346	lethal(2)essential for life protein, l2efl [Source:VB Community Annotation]			GO:0046872	metal ion binding
LOC5577713	91.3987	3.17591	0.399086	7.95795	1.74913e-15	9.87646e-14	AAEL013352	lethal(2)essential for life protein, l2efl [Source:VB Community Annotation]			GO:0046872	metal ion binding
LOC5569932	431.323	2.7266	0.342929	7.9509	1.85165e-15	1.04096e-13	AAEL008028	monocarboxylate transporter [Source:VB Community Annotation]			GO:0016020,GO:0016021,GO:0022857,GO:0055085	membrane,integral component of membrane,transmembrane transporter activity,transmembrane transport
LOC5572725	28640.1	0.850696	0.107252	7.93173	2.16107e-15	1.20964e-13	AAEL009994	60S ribosomal protein L4 [Source:UniProtKB/TrEMBL;Acc:Q1HQJ0]	RpL4		GO:0003735,GO:0005840,GO:0006412	structural constituent of ribosome,ribosome,translation
LOC5568548	124.397	-2.69394	0.341778	-7.88213	3.21845e-15	1.79369e-13	AAEL006957	GPCR Orphan/Putative Class B Family [Source:VB Community Annotation]	GPRNNB4		GO:0004888,GO:0004930,GO:0005515,GO:0007166,GO:0007186,GO:0016020,GO:0016021	transmembrane signaling receptor activity,G protein-coupled receptor activity,protein binding,cell surface receptor signaling pathway,G protein-coupled receptor signaling pathway,membrane,integral component of membrane
LOC5565856	128.359	2.21941	0.282007	7.87005	3.54509e-15	1.96722e-13	AAEL005040	E3 ubiquitin-protein ligase [Source:UniProtKB/TrEMBL;Acc:Q17BB8]			GO:0005515,GO:0005634,GO:0005737,GO:0006511,GO:0007275,GO:0008270,GO:0016567,GO:0016740,GO:0042025,GO:0046872	protein binding,nucleus,cytoplasm,ubiquitin-dependent protein catabolic process,multicellular organism development,zinc ion binding,protein ubiquitination,transferase activity,host cell nucleus,metal ion binding
LOC5577723	17054.9	0.65612	0.0834336	7.86398	3.72119e-15	2.05608e-13	AAEL013359	DEAD box ATP-dependent RNA helicase [Source:VB Community Annotation]			GO:0000166,GO:0003676,GO:0003724,GO:0003743,GO:0004004,GO:0004386,GO:0005524,GO:0006413,GO:0016787	nucleotide binding,nucleic acid binding,RNA helicase activity,translation initiation factor activity,GO_0004004,helicase activity,ATP binding,translational initiation,hydrolase activity
LOC5567124	579.544	2.08422	0.265129	7.86117	3.80567e-15	2.09377e-13	AAEL023543
LOC5573755	2229.1	-1.11608	0.141998	-7.85984	3.84629e-15	2.10711e-13	AAEL000276				GO:0005515,GO:0005634,GO:0016567	protein binding,nucleus,protein ubiquitination
LOC5572422	171.52	2.66577	0.339299	7.85669	3.94416e-15	2.15157e-13	AAEL001809
LOC5571685	1160.53	2.65469	0.338076	7.85234	4.08352e-15	2.21819e-13	AAEL009214	diazepam binding inhibitor, putative [Source:VB Community Annotation]			GO:0000062	fatty-acyl-CoA binding
LOC5572180	244.166	3.65198	0.465423	7.8466	4.2747e-15	2.31229e-13	AAEL009591	cytochrome P450 [Source:VB Community Annotation]	CYP9M8		GO:0004497,GO:0005506,GO:0016491,GO:0016705,GO:0020037,GO:0046872,GO:0055114	monooxygenase activity,iron ion binding,oxidoreductase activity,oxidoreductase activity, acting on paired donors, with incorporation or reduction of molecular oxygen,heme binding,metal ion binding,oxidation-reduction process
LOC110681364	746.176	1.05263	0.134522	7.82496	5.07814e-15	2.7354e-13	AAEL026177				GO:0000062,GO:0004190,GO:0005515,GO:0006508	fatty-acyl-CoA binding,aspartic-type endopeptidase activity,protein binding,proteolysis
LOC5566892	264.248	-1.43257	0.183568	-7.80403	5.99624e-15	3.21648e-13	AAEL000812				GO:0004930,GO:0005886,GO:0007165,GO:0007186,GO:0016020,GO:0016021	G protein-coupled receptor activity,plasma membrane,signal transduction,G protein-coupled receptor signaling pathway,membrane,integral component of membrane
LOC5570414	887.469	1.07752	0.138288	7.79186	6.60278e-15	3.52714e-13	AAEL021996
LOC5568047	230.944	1.82214	0.234206	7.78009	7.24737e-15	3.85548e-13	AAEL006486				GO:0016020,GO:0016021	membrane,integral component of membrane
LOC5572241	2480.15	-1.28074	0.164921	-7.76581	8.11279e-15	4.29811e-13	AAEL009666	set domain protein [Source:VB Community Annotation]			GO:0003677,GO:0003682,GO:0005515,GO:0005634,GO:0008168,GO:0016740,GO:0018024,GO:0032259,GO:0034968,GO:0046872	DNA binding,chromatin binding,protein binding,nucleus,methyltransferase activity,transferase activity,histone-lysine N-methyltransferase activity,methylation,histone lysine methylation,metal ion binding
LOC110679609	1272.21	-0.956466	0.123754	-7.72875	1.08605e-14	5.73025e-13	AAEL027318				GO:0000124,GO:0003712,GO:1903506	SAGA complex,transcription coregulator activity,regulation of nucleic acid-templated transcription
LOC5576658	3012.69	0.908963	0.117867	7.71174	1.24116e-14	6.5219e-13	AAEL012681	60S ribosomal protein L24 [Source:UniProtKB/TrEMBL;Acc:Q16LE3]	RpL24
LOC5569815	681.695	3.25278	0.421854	7.71068	1.25147e-14	6.54935e-13	AAEL001293
LOC5568097	1657.45	-0.945128	0.122658	-7.70542	1.30414e-14	6.79738e-13	AAEL023759				GO:0016301,GO:0016310	kinase activity,phosphorylation
LOC5563590	21515.7	0.8833	0.114675	7.70261	1.33312e-14	6.92039e-13	AAEL000032	40S ribosomal protein S6 [Source:UniProtKB/Swiss-Prot;Acc:Q9U761]	RpS6		GO:0003735,GO:0005840,GO:0006412	structural constituent of ribosome,ribosome,translation
LOC5574471	66.3041	-5.32099	0.690869	-7.70188	1.34076e-14	6.9321e-13	AAEL002367	Carboxy/choline esterase Alpha Esterase [Source:VB Community Annotation]	CCEAE1B		GO:0016787,GO:0052689	hydrolase activity,carboxylic ester hydrolase activity
LOC5574783	161561	0.805685	0.10463	7.7003	1.35751e-14	6.99063e-13	AAEL011414	high mobility group non-histone protein, putative [Source:VB Community Annotation]			GO:0003677,GO:0005634	DNA binding,nucleus
LOC5569820	143.029	-4.41735	0.574641	-7.68714	1.50462e-14	7.71732e-13	AAEL001320	cytochrome P450 [Source:VB Community Annotation]	CYP9M4		GO:0004497,GO:0005506,GO:0016020,GO:0016021,GO:0016491,GO:0016705,GO:0020037,GO:0046872,GO:0055114	monooxygenase activity,iron ion binding,membrane,integral component of membrane,oxidoreductase activity,oxidoreductase activity, acting on paired donors, with incorporation or reduction of molecular oxygen,heme binding,metal ion binding,oxidation-reduction process
LOC5567887	135.965	2.864	0.372647	7.68558	1.52309e-14	7.78103e-13	AAEL006327	sulfotransferase (sult) [Source:VB Community Annotation]			GO:0008146	sulfotransferase activity
LOC5577552	341.26	1.55303	0.202206	7.68043	1.58557e-14	8.06822e-13	AAEL013262				GO:0004568,GO:0006032,GO:0016998	chitinase activity,chitin catabolic process,cell wall macromolecule catabolic process
LOC5563592	8517.24	0.861067	0.112278	7.66908	1.73238e-14	8.78055e-13	AAEL000010	60S ribosomal protein L36 [Source:UniProtKB/TrEMBL;Acc:Q1HR17]	Rpl36-1	Rps36	GO:0003735,GO:0005840,GO:0006412	structural constituent of ribosome,ribosome,translation
LOC5569725	399.816	1.26569	0.165774	7.63503	2.25768e-14	1.13982e-12	AAEL007885	translation initiation factor-3 (IF3), putative [Source:VB Community Annotation]			GO:0003743,GO:0006412,GO:0006413	translation initiation factor activity,translation,translational initiation
LOC5578718	222.848	3.21323	0.421813	7.61766	2.58323e-14	1.29908e-12	AAEL009742	Homeobox protein abdominal-A homolog [Source:VB Community Annotation]			GO:0000981,GO:0003677,GO:0003700,GO:0005634,GO:0006355,GO:0006357,GO:0007275,GO:0009952,GO:0043565	DNA-binding transcription factor activity, RNA polymerase II-specific,DNA binding,DNA-binding transcription factor activity,nucleus,regulation of transcription, DNA-templated,regulation of transcription by RNA polymerase II,multicellular organism development,anterior/posterior pattern specification,sequence-specific DNA binding
LOC5576295	500.315	2.39485	0.314904	7.60503	2.8484e-14	1.42686e-12	AAEL012449	myosin x [Source:VB Community Annotation]			GO:0000166,GO:0003774,GO:0003779,GO:0005515,GO:0005524,GO:0016459	nucleotide binding,motor activity,actin binding,protein binding,ATP binding,myosin complex
LOC5570787	86.6618	-2.22334	0.292868	-7.59163	3.15917e-14	1.5764e-12	AAEL008559	glutaminase [Source:VB Community Annotation]			GO:0004359,GO:0005515,GO:0006541,GO:0016787	glutaminase activity,protein binding,glutamine metabolic process,hydrolase activity
LOC5576455	68.9959	4.16132	0.548623	7.58504	3.32391e-14	1.6522e-12	AAEL012538	leucine-rich immune protein (Short) [Source:VB Community Annotation]	LRIM6		GO:0005515	protein binding
LOC5568896	322.889	1.92407	0.254343	7.56487	3.8824e-14	1.92239e-12	AAEL007218				GO:0006629,GO:0016020,GO:0016021,GO:0016491,GO:0055114,GO:0080019,GO:0102965	lipid metabolic process,membrane,integral component of membrane,oxidoreductase activity,oxidation-reduction process,fatty-acyl-CoA reductase (alcohol-forming) activity,alcohol-forming fatty acyl-CoA reductase activity
LOC5570819	508.027	2.27441	0.300899	7.55872	4.07042e-14	2.00776e-12	AAEL008607	tep3 [Source:VB Community Annotation]			GO:0004866,GO:0005576,GO:0005615,GO:0010951	endopeptidase inhibitor activity,extracellular region,extracellular space,negative regulation of endopeptidase activity
LOC5575748	4615.12	-0.760901	0.100877	-7.54287	4.59733e-14	2.25901e-12	AAEL012057	enhancer of polycomb [Source:VB Community Annotation]			GO:0005634,GO:0006357,GO:0032777,GO:0035267	nucleus,regulation of transcription by RNA polymerase II,Piccolo NuA4 histone acetyltransferase complex,NuA4 histone acetyltransferase complex
LOC5567198	895.271	1.88981	0.250616	7.54064	4.67653e-14	2.28919e-12	AAEL019837				GO:0005515	protein binding
LOC5568275	761.864	-1.52067	0.20172	-7.5385	4.7542e-14	2.31839e-12	AAEL026387				GO:0016747	transferase activity, transferring acyl groups other than amino-acyl groups
LOC5573735	169.923	-1.71671	0.22784	-7.5347	4.89458e-14	2.37784e-12	AAEL027066				GO:0003824,GO:0004630,GO:0006654,GO:0016042,GO:0016787,GO:0035091,GO:0048017,GO:0070290	catalytic activity,phospholipase D activity,phosphatidic acid biosynthetic process,lipid catabolic process,hydrolase activity,phosphatidylinositol binding,inositol lipid-mediated signaling,N-acylphosphatidylethanolamine-specific phospholipase D activity
LOC5569214	214.765	1.95813	0.2602	7.52549	5.25217e-14	2.54197e-12	AAEL007473	cytochrome P450 [Source:VB Community Annotation]	CYP6AH1		GO:0004497,GO:0005506,GO:0005789,GO:0016020,GO:0016491,GO:0016705,GO:0020037,GO:0031090,GO:0046872,GO:0055114	monooxygenase activity,iron ion binding,endoplasmic reticulum membrane,membrane,oxidoreductase activity,oxidoreductase activity, acting on paired donors, with incorporation or reduction of molecular oxygen,heme binding,organelle membrane,metal ion binding,oxidation-reduction process
LOC5564530	925.005	-1.04128	0.138533	-7.51651	5.62573e-14	2.71257e-12	AAEL013092	Cation chloride cotransporter [Source:UniProtKB/TrEMBL;Acc:A0A1S4FYI0]			GO:0005215,GO:0006811,GO:0016020,GO:0016021,GO:0022857,GO:0055085	transporter activity,ion transport,membrane,integral component of membrane,transmembrane transporter activity,transmembrane transport
LOC5573569	497.219	-1.64548	0.219272	-7.5043	6.1757e-14	2.96664e-12	AAEL019476				GO:0005085,GO:0005089,GO:0005515	guanyl-nucleotide exchange factor activity,Rho guanyl-nucleotide exchange factor activity,protein binding
LOC5574902	253.369	1.37111	0.182925	7.49546	6.60666e-14	3.16186e-12	AAEL011500	Cdc42 protein, putative [Source:VB Community Annotation]			GO:0003924,GO:0005525	GTPase activity,GTP binding
LOC5578692	288.653	1.92952	0.257501	7.49325	6.71887e-14	3.20366e-12	AAEL022578	Clip-domain serine protease [Source:UniProtKB/TrEMBL;Acc:Q1HQI3]			GO:0004252,GO:0005576,GO:0006508,GO:0008233,GO:0008236,GO:0016787	serine-type endopeptidase activity,extracellular region,proteolysis,peptidase activity,serine-type peptidase activity,hydrolase activity
LOC5567646	157.817	2.51006	0.33527	7.4867	7.06268e-14	3.35517e-12	AAEL006240	purple acid phosphatase, putative [Source:VB Community Annotation]			GO:0003993,GO:0016311,GO:0016787,GO:0046872	acid phosphatase activity,dephosphorylation,hydrolase activity,metal ion binding
LOC110679455	516.545	1.92732	0.257967	7.47118	7.9477e-14	3.76172e-12	AAEL023757				GO:0007411	axon guidance
LOC5573540	573.145	-0.997413	0.133846	-7.45197	9.19593e-14	4.33657e-12	AAEL010591	glutathione transferase [Source:VB Community Annotation]	GSTD6		GO:0005515	protein binding
LOC5572409	240.162	2.7534	0.369821	7.44522	9.67843e-14	4.54745e-12	AAEL019468				GO:0004867,GO:0005576,GO:0008233,GO:0010466,GO:0010951,GO:0030414	serine-type endopeptidase inhibitor activity,extracellular region,peptidase activity,negative regulation of peptidase activity,negative regulation of endopeptidase activity,peptidase inhibitor activity
LOC5575057	108.063	4.55636	0.612953	7.43345	1.05797e-13	4.95286e-12	AAEL011612	C-Type Lectin (CTL) - mannose binding. Transcript A [Source:VB Community Annotation]	CTLMA6
LOC23687552	41.1227	4.84533	0.653939	7.40946	1.26819e-13	5.91546e-12	AAEL017132	C-Type Lysozyme (Lys-C). [Source:VB Community Annotation]	LYSC4		GO:0003796	lysozyme activity
LOC5574733	442.81	1.0125	0.136719	7.40568	1.30477e-13	6.0641e-12	AAEL018216				GO:0005515	protein binding
LOC110678752	45.0286	-3.9611	0.535157	-7.40177	1.34385e-13	6.22329e-12	AAEL027926				GO:0004888,GO:0004890,GO:0005216,GO:0005230,GO:0006811,GO:0016020,GO:0016021,GO:0034220	transmembrane signaling receptor activity,GABA-A receptor activity,ion channel activity,extracellular ligand-gated ion channel activity,ion transport,membrane,integral component of membrane,ion transmembrane transport
LOC5574061	1692.94	-0.786936	0.106507	-7.38862	1.4836e-13	6.84581e-12	AAEL020957				GO:0000166,GO:0003676,GO:0005524,GO:0008270	nucleotide binding,nucleic acid binding,ATP binding,zinc ion binding
LOC5572902	702.302	-1.11906	0.151526	-7.38527	1.52143e-13	6.9953e-12	AAEL019711				GO:0004435,GO:0005509,GO:0006629,GO:0007165,GO:0008081,GO:0016042,GO:0016787,GO:0035556	phosphatidylinositol phospholipase C activity,calcium ion binding,lipid metabolic process,signal transduction,phosphoric diester hydrolase activity,lipid catabolic process,hydrolase activity,intracellular signal transduction
LOC5573763	3824.11	0.85836	0.116299	7.3806	1.57572e-13	7.21917e-12	AAEL000269
LOC5570058	3339.44	-0.771203	0.104526	-7.37812	1.60546e-13	7.32931e-12	AAEL000217	serine/threonine protein kinase [Source:VB Community Annotation]			GO:0004672,GO:0005524,GO:0006468	protein kinase activity,ATP binding,protein phosphorylation
LOC5570847	85.406	4.83348	0.656415	7.36344	1.79224e-13	8.15313e-12	AAEL008620	D7 protein, putative [Source:VB Community Annotation]			GO:0005549	odorant binding
LOC110680904	1870.83	8.69223	1.18095	7.36036	1.83415e-13	8.28523e-12	AAEL024580				GO:0016020,GO:0016021	membrane,integral component of membrane
LOC5576738	1870.83	8.69223	1.18095	7.36036	1.83415e-13	8.28523e-12	AAEL002962				GO:0016020,GO:0016021	membrane,integral component of membrane
LOC110679580	217.298	2.44916	0.332859	7.35794	1.86765e-13	8.40706e-12	AAEL021926
LOC110681172	462.334	-1.26182	0.171521	-7.35664	1.88594e-13	8.45978e-12	AAEL021453				GO:0000139,GO:0005794,GO:0006486,GO:0016020,GO:0016021,GO:0016757	Golgi membrane,Golgi apparatus,protein glycosylation,membrane,integral component of membrane,transferase activity, transferring glycosyl groups
LOC5567014	250.353	2.02347	0.275265	7.35099	1.96739e-13	8.79453e-12	AAEL005763	lysosomal alpha-mannosidase (mannosidase alpha class 2b member 1) [Source:VB Community Annotation]			GO:0003824,GO:0004559,GO:0005975,GO:0006013,GO:0008152,GO:0016787,GO:0016798,GO:0030246,GO:0046872	catalytic activity,alpha-mannosidase activity,carbohydrate metabolic process,mannose metabolic process,metabolic process,hydrolase activity,hydrolase activity, acting on glycosyl bonds,carbohydrate binding,metal ion binding
LOC5574971	972.494	-1.27671	0.173901	-7.34158	2.11094e-13	9.40352e-12	AAEL019422				GO:0000118,GO:0004407,GO:0005634,GO:0006325,GO:0016575,GO:0016787,GO:0032041,GO:0070932	histone deacetylase complex,histone deacetylase activity,nucleus,chromatin organization,histone deacetylation,hydrolase activity,NAD-dependent histone deacetylase activity (H3-K14 specific),histone H3 deacetylation
LOC5568649	113.12	2.72048	0.370759	7.3376	2.17464e-13	9.65389e-12	AAEL007018	udp-glucose 4-epimerase [Source:VB Community Annotation]			GO:0003974,GO:0003978,GO:0005975,GO:0006012,GO:0016853	UDP-N-acetylglucosamine 4-epimerase activity,UDP-glucose 4-epimerase activity,carbohydrate metabolic process,galactose metabolic process,isomerase activity
LOC5571066	1040.75	-0.869562	0.118817	-7.31848	2.50802e-13	1.10956e-11	AAEL008823	rac serine/threonine kinase [Source:VB Community Annotation]			GO:0000166,GO:0004672,GO:0004674,GO:0005524,GO:0006468,GO:0016301,GO:0016310,GO:0016740	nucleotide binding,protein kinase activity,protein serine/threonine kinase activity,ATP binding,protein phosphorylation,kinase activity,phosphorylation,transferase activity
LOC5574593	3801.85	-0.964458	0.13184	-7.31534	2.56723e-13	1.13187e-11	AAEL002422	cytoplasmic polyadenylation element binding protein (cpeb) [Source:VB Community Annotation]			GO:0003676,GO:0003723,GO:0003730,GO:0006417,GO:0045182	nucleic acid binding,RNA binding,mRNA 3'-UTR binding,regulation of translation,translation regulator activity
LOC5567517	52.207	-3.33704	0.456676	-7.30723	2.72699e-13	1.1982e-11	AAEL019501				GO:0004222,GO:0005576,GO:0006508,GO:0008233,GO:0008237,GO:0008270,GO:0046872	metalloendopeptidase activity,extracellular region,proteolysis,peptidase activity,metallopeptidase activity,zinc ion binding,metal ion binding
LOC5579205	68.326	3.12029	0.427154	7.30483	2.77622e-13	1.21568e-11	AAEL014045	allantoicase [Source:VB Community Annotation]			GO:0000256,GO:0004037,GO:0016787	allantoin catabolic process,allantoicase activity,hydrolase activity
LOC23687599	4190.34	-1.44112	0.197642	-7.29157	3.06364e-13	1.3337e-11	AAEL017179				GO:0055114	oxidation-reduction process
LOC110677176	51.2814	-4.96403	0.680801	-7.29145	3.06645e-13	1.3337e-11	AAEL026214				GO:0000166,GO:0004672,GO:0004674,GO:0005524,GO:0006468,GO:0016301,GO:0016310,GO:0016740	nucleotide binding,protein kinase activity,protein serine/threonine kinase activity,ATP binding,protein phosphorylation,kinase activity,phosphorylation,transferase activity
LOC5579075	593.034	1.36391	0.187356	7.27979	3.34349e-13	1.4493e-11	AAEL019426				GO:0003677,GO:0003700,GO:0005634,GO:0006355,GO:0042025,GO:0043565	DNA binding,DNA-binding transcription factor activity,nucleus,regulation of transcription, DNA-templated,host cell nucleus,sequence-specific DNA binding
LOC5567643	161.055	1.59095	0.219092	7.26157	3.8261e-13	1.65293e-11	AAEL006228				GO:0005634	nucleus
LOC110674409	36.8725	-4.13861	0.570431	-7.25524	4.00958e-13	1.7264e-11	AAEL023198
LOC5576174	327.562	2.31723	0.319654	7.24917	4.19322e-13	1.79945e-11	AAEL012370	Brain chitinase and chia [Source:UniProtKB/TrEMBL;Acc:A0A1S4FVX1]			GO:0004553,GO:0005975,GO:0008061,GO:0008152,GO:0016787,GO:0016798	hydrolase activity, hydrolyzing O-glycosyl compounds,carbohydrate metabolic process,chitin binding,metabolic process,hydrolase activity,hydrolase activity, acting on glycosyl bonds
LOC5573227	228.799	1.46472	0.202152	7.24561	4.30507e-13	1.84131e-11	AAEL010306				GO:0016020,GO:0016021	membrane,integral component of membrane
LOC5563689	201.73	2.48678	0.343447	7.24063	4.46589e-13	1.90377e-11	AAEL000551				GO:0004866,GO:0004867,GO:0005576,GO:0010466,GO:0010951,GO:0030414	endopeptidase inhibitor activity,serine-type endopeptidase inhibitor activity,extracellular region,negative regulation of peptidase activity,negative regulation of endopeptidase activity,peptidase inhibitor activity
LOC110676569	1878.24	2.29488	0.317027	7.23876	4.52798e-13	1.92387e-11	AAEL025618
LOC5564210	886.07	-0.852718	0.117813	-7.23791	4.55668e-13	1.92969e-11	AAEL021625				GO:0046872	metal ion binding
LOC5571281	1456.99	-1.06066	0.146601	-7.23498	4.65588e-13	1.96524e-11	AAEL001583				GO:0005829,GO:0006895	cytosol,Golgi to endosome transport
LOC5575445	11738.4	-0.661575	0.0915534	-7.22611	4.9704e-13	2.09114e-11	AAEL002652
LOC5577715	203.146	1.66051	0.230589	7.20118	5.96942e-13	2.50327e-11	AAEL013351	lethal(2)essential for life protein, l2efl [Source:VB Community Annotation]			GO:0046872	metal ion binding
LOC110675573	330.972	1.68928	0.234996	7.18857	6.54752e-13	2.73678e-11	AAEL027407
LOC5576563	105.247	-3.23129	0.449955	-7.18136	6.90198e-13	2.8756e-11	AAEL023505				GO:0004252,GO:0006508	serine-type endopeptidase activity,proteolysis
LOC5566848	1330.68	-0.787773	0.1098	-7.17464	7.24968e-13	3.01072e-11	AAEL000815				GO:0006281,GO:0006974,GO:0010952,GO:0016504,GO:0070577,GO:0070628	DNA repair,cellular response to DNA damage stimulus,positive regulation of peptidase activity,peptidase activator activity,lysine-acetylated histone binding,proteasome binding
LOC5579359	657.716	2.33553	0.325792	7.16879	7.5665e-13	3.13219e-11	AAEL021367				GO:0042302	structural constituent of cuticle
LOC5575208	3523.35	-2.01459	0.282078	-7.14198	9.19943e-13	3.79594e-11	AAEL019652
LOC5564606	1071.43	1.33121	0.186522	7.13704	9.53647e-13	3.92244e-11	AAEL014526	sideroflexin 1,2,3 [Source:VB Community Annotation]			GO:0005739,GO:0006811,GO:0006865,GO:0015075,GO:0016020,GO:0016021,GO:0031966,GO:0034220,GO:0055085	mitochondrion,ion transport,amino acid transport,ion transmembrane transporter activity,membrane,integral component of membrane,mitochondrial membrane,ion transmembrane transport,transmembrane transport
LOC5566279	916.132	-1.45314	0.203836	-7.129	1.01104e-12	4.14526e-11	AAEL000747
LOC5571677	208.974	-1.77638	0.249295	-7.12562	1.03614e-12	4.23469e-11	AAEL001656	sodium-dependent phosphate transporter [Source:VB Community Annotation]			GO:0016020,GO:0016021,GO:0022857,GO:0055085	membrane,integral component of membrane,transmembrane transporter activity,transmembrane transport
LOC110678112	46.8499	3.25125	0.457564	7.10557	1.1983e-12	4.88195e-11	AAEL022887
LOC5577910	7507.54	0.722595	0.101934	7.08886	1.35226e-12	5.4918e-11	AAEL003352	60S ribosomal protein l7ae [Source:VB Community Annotation]	RpL7ae		GO:0003723,GO:0005634,GO:0005730,GO:0005840,GO:0042254,GO:1990904	RNA binding,nucleus,nucleolus,ribosome,ribosome biogenesis,ribonucleoprotein complex
LOC5575933	195.695	2.71676	0.383946	7.0759	1.48483e-12	6.01121e-11	AAEL012162	aldehyde dehydrogenase [Source:VB Community Annotation]			GO:0006081,GO:0016020,GO:0016021,GO:0016491,GO:0016620,GO:0055114	cellular aldehyde metabolic process,membrane,integral component of membrane,oxidoreductase activity,oxidoreductase activity, acting on the aldehyde or oxo group of donors, NAD or NADP as acceptor,oxidation-reduction process
LOC5568897	70.8602	-3.50677	0.495922	-7.0712	1.53597e-12	6.18317e-11	AAEL026878				GO:0006629,GO:0006633,GO:0016020,GO:0016021,GO:0016491,GO:0016717,GO:0055114	lipid metabolic process,fatty acid biosynthetic process,membrane,integral component of membrane,oxidoreductase activity,oxidoreductase activity, acting on paired donors, with oxidation of a pair of donors resulting in the reduction of molecular oxygen to two molecules of water,oxidation-reduction process
LOC5577073	2216.69	-0.911281	0.128874	-7.07112	1.53691e-12	6.18317e-11	AAEL019939				GO:0003779,GO:0007010,GO:0051015,GO:0051693	actin binding,cytoskeleton organization,actin filament binding,actin filament capping
LOC5563667	662.629	-0.954799	0.13505	-7.06996	1.54979e-12	6.21557e-11	AAEL000550	werner helicase interacting protein [Source:VB Community Annotation]			GO:0000166,GO:0003677,GO:0006260,GO:0006281,GO:0006310,GO:0009378,GO:0032508	nucleotide binding,DNA binding,DNA replication,DNA repair,DNA recombination,four-way junction helicase activity,DNA duplex unwinding
LOC5572878	216.958	2.91092	0.412033	7.06478	1.6087e-12	6.4318e-11	AAEL020040
LOC5567548	71.9613	-2.50117	0.354113	-7.06319	1.62722e-12	6.4857e-11	AAEL006137	Serine Protease Inhibitor (serpin) homologue - unlikely to be inhibitory. [Source:VB Community Annotation]	SRPN19		GO:0004867,GO:0005615,GO:0010466,GO:0010951,GO:0030414	serine-type endopeptidase inhibitor activity,extracellular space,negative regulation of peptidase activity,negative regulation of endopeptidase activity,peptidase inhibitor activity
LOC5565593	2003.5	-1.09488	0.155091	-7.0596	1.66977e-12	6.63477e-11	AAEL004875	F-box only protein [Source:UniProtKB/TrEMBL;Acc:A0A1S4F8W1]			GO:0000151,GO:0005515,GO:0008270,GO:0016567,GO:0046872	ubiquitin ligase complex,protein binding,zinc ion binding,protein ubiquitination,metal ion binding
LOC5573431	1770.87	1.43415	0.203337	7.05307	1.75009e-12	6.93252e-11	AAEL026825				GO:0016020,GO:0016021,GO:0022857,GO:0055085	membrane,integral component of membrane,transmembrane transporter activity,transmembrane transport
LOC5569526	1817.91	-0.901717	0.128145	-7.03666	1.96896e-12	7.77557e-11	AAEL007696	TOLL pathway signalling NF-kappaB Relish-like transcription factor [Source:VB Community Annotation]	REL1A		GO:0002218,GO:0003677,GO:0003700,GO:0005634,GO:0005737,GO:0006355,GO:0006357,GO:0042025	activation of innate immune response,DNA binding,DNA-binding transcription factor activity,nucleus,cytoplasm,regulation of transcription, DNA-templated,regulation of transcription by RNA polymerase II,host cell nucleus
LOC5577378	34.1109	4.14946	0.590082	7.03202	2.03569e-12	8.0145e-11	AAEL000420	cathepsin o [Source:VB Community Annotation]			GO:0006508,GO:0008234,GO:0016020,GO:0016021	proteolysis,cysteine-type peptidase activity,membrane,integral component of membrane
LOC5564875	2736.05	-0.756965	0.107778	-7.02338	2.16567e-12	8.50025e-11	AAEL004462
LOC5569998	70.989	-3.02706	0.432899	-6.99254	2.69951e-12	1.05634e-10	AAEL000164	d-amino acid oxidase [Source:VB Community Annotation]			GO:0003884,GO:0016491,GO:0046416,GO:0055114,GO:0071949	D-amino-acid oxidase activity,oxidoreductase activity,D-amino acid metabolic process,oxidation-reduction process,FAD binding
LOC5574464	993.715	-1.11362	0.159311	-6.99025	2.7439e-12	1.07045e-10	AAEL023335				GO:0005515	protein binding
LOC5572147	36.9996	-4.61736	0.660742	-6.98814	2.78559e-12	1.08216e-10	AAEL009562				GO:0008270	zinc ion binding
LOC5565690	5926.75	-0.686032	0.0981745	-6.98788	2.79071e-12	1.08216e-10	AAEL004918	brat protein [Source:VB Community Annotation]			GO:0003676,GO:0005515,GO:0008270	nucleic acid binding,protein binding,zinc ion binding
LOC5566202	431.418	-1.13567	0.162809	-6.97543	3.04929e-12	1.17888e-10	AAEL025488				GO:0046872	metal ion binding
LOC5573882	381.945	-1.00194	0.143787	-6.96823	3.2096e-12	1.23714e-10	AAEL010805	deformed wings, putative [Source:VB Community Annotation]			GO:0003676	nucleic acid binding
LOC110674126	77.6803	-2.84267	0.408379	-6.96086	3.38205e-12	1.29972e-10	AAEL025386
LOC5569927	2854.91	-1.14887	0.165183	-6.95512	3.52261e-12	1.34676e-10	AAEL008015				GO:0005515,GO:0005634	protein binding,nucleus
LOC5567991	1256.4	-0.967667	0.139132	-6.95501	3.5254e-12	1.34676e-10	AAEL006433				GO:0006811,GO:0008381,GO:0016020,GO:0016021,GO:0034220	ion transport,mechanosensitive ion channel activity,membrane,integral component of membrane,ion transmembrane transport
LOC23687941	1158.75	-0.912414	0.131314	-6.94831	3.6968e-12	1.40807e-10	AAEL019787	CCAP receptor [Source:UniProtKB/TrEMBL;Acc:A0A411JKD0]			GO:0003676,GO:0005634,GO:0046872	nucleic acid binding,nucleus,metal ion binding
LOC5574293	2489.51	-1.44263	0.207801	-6.94239	3.85526e-12	1.46409e-10	AAEL021092				GO:0003712,GO:0005634,GO:0006357,GO:0030274	transcription coregulator activity,nucleus,regulation of transcription by RNA polymerase II,LIM domain binding
LOC5570163	329.648	2.2928	0.33055	6.93631	4.02461e-12	1.52391e-10	AAEL008144	AMP dependent ligase [Source:VB Community Annotation]			GO:0003824	catalytic activity
LOC5569237	1822.31	0.898803	0.129606	6.93489	4.06532e-12	1.53481e-10	AAEL026565
LOC110677665	2070.16	-0.743819	0.107276	-6.93369	4.10007e-12	1.5434e-10	AAEL010932	RNAse h [Source:VB Community Annotation]			GO:0003676,GO:0004527,GO:0046872,GO:0090305	nucleic acid binding,exonuclease activity,metal ion binding,nucleic acid phosphodiester bond hydrolysis
LOC5565220	143.004	2.75779	0.39789	6.93103	4.17779e-12	1.56807e-10	AAEL004676	(s)-2-hydroxy-acid oxidase [Source:VB Community Annotation]			GO:0003824,GO:0010181,GO:0016491,GO:0055114	catalytic activity,FMN binding,oxidoreductase activity,oxidation-reduction process
LOC5570086	79.8792	3.01817	0.435598	6.92881	4.24409e-12	1.58833e-10	AAEL001328				GO:0016020,GO:0016021	membrane,integral component of membrane
LOC110675513	151.914	3.60472	0.520632	6.92374	4.39858e-12	1.64137e-10	AAEL024984
LOC5574338	5095.87	0.603829	0.0872236	6.92277	4.42901e-12	1.64795e-10	AAEL002334	eukaryotic translation initiation factor 3 subunit E (eIF3e) [Source:VB Community Annotation]	eIF3-S6		GO:0001732,GO:0002183,GO:0003743,GO:0005737,GO:0005852,GO:0006412,GO:0006413,GO:0016282,GO:0033290,GO:0071540	formation of cytoplasmic translation initiation complex,cytoplasmic translational initiation,translation initiation factor activity,cytoplasm,eukaryotic translation initiation factor 3 complex,translation,translational initiation,eukaryotic 43S preinitiation complex,eukaryotic 48S preinitiation complex,eukaryotic translation initiation factor 3 complex, eIF3e
LOC5566662	589.596	1.05206	0.152065	6.91849	4.56495e-12	1.69364e-10	AAEL023078				GO:0005739,GO:0005743,GO:0016020,GO:0016021,GO:0055114,GO:0070469	mitochondrion,mitochondrial inner membrane,membrane,integral component of membrane,oxidation-reduction process,respirasome
LOC5566909	589.421	1.05142	0.152189	6.90863	4.89365e-12	1.81037e-10	AAEL023078				GO:0005739,GO:0005743,GO:0016020,GO:0016021,GO:0055114,GO:0070469	mitochondrion,mitochondrial inner membrane,membrane,integral component of membrane,oxidation-reduction process,respirasome
LOC5574328	1716.03	-0.872023	0.126338	-6.90229	5.11695e-12	1.88755e-10	AAEL019424				GO:0005515	protein binding
LOC5563804	185.269	2.04338	0.296084	6.90134	5.15139e-12	1.89483e-10	AAEL014136				GO:0016020,GO:0016021	membrane,integral component of membrane
LOC5568363	276.709	2.88299	0.419721	6.86882	6.47335e-12	2.3743e-10	AAEL001077	Clip-Domain Serine Protease family B. Protease homologue. [Source:VB Community Annotation]	CLIPB45		GO:0004252,GO:0006508	serine-type endopeptidase activity,proteolysis
LOC5572460	65.591	2.88673	0.420623	6.863	6.74306e-12	2.4662e-10	AAEL001812	organic anion transporter [Source:VB Community Annotation]			GO:0005215,GO:0005515,GO:0005886,GO:0006811,GO:0016020,GO:0016021,GO:0022857,GO:0055085	transporter activity,protein binding,plasma membrane,ion transport,membrane,integral component of membrane,transmembrane transporter activity,transmembrane transport
LOC5576133	248.539	1.55146	0.226188	6.85917	6.92596e-12	2.52592e-10	AAEL002812
LOC5572173	301.997	1.2604	0.183841	6.8559	7.08628e-12	2.57125e-10	AAEL009590	outer mitochondrial translocase subunit, putative [Source:VB Community Annotation]			GO:0005739,GO:0005741,GO:0005742,GO:0015031,GO:0016020,GO:0016021,GO:0030150	mitochondrion,mitochondrial outer membrane,mitochondrial outer membrane translocase complex,protein transport,membrane,integral component of membrane,protein import into mitochondrial matrix
LOC5565133	498.913	-1.13336	0.165314	-6.85583	7.0902e-12	2.57125e-10	AAEL014744				GO:0046872	metal ion binding
LOC5579831	488.793	-0.937524	0.136878	-6.84933	7.41977e-12	2.68321e-10	AAEL005863				GO:0051726	regulation of cell cycle
LOC110676462	965.632	-0.949694	0.138673	-6.84844	7.46572e-12	2.69226e-10	AAEL019778
LOC110679299	202.638	2.74591	0.40112	6.84559	7.6162e-12	2.73885e-10	AAEL025647
LOC110679437	37.1693	-5.08385	0.743156	-6.84088	7.87062e-12	2.82246e-10	AAEL026324
LOC5567714	580.668	-2.12472	0.310673	-6.83908	7.97018e-12	2.85022e-10	AAEL006287	PIWI [Source:VB Community Annotation]	PIWI7		GO:0003676,GO:0005515,GO:0031047	nucleic acid binding,protein binding,gene silencing by RNA
LOC5566511	449.091	2.31184	0.33821	6.8355	8.17182e-12	2.91424e-10	AAEL012522	Sodium-dependent phosphate transporter [Source:UniProtKB/TrEMBL;Acc:A0A1S4FWV3]			GO:0016020,GO:0016021,GO:0022857,GO:0055085	membrane,integral component of membrane,transmembrane transporter activity,transmembrane transport
LOC5578928	1383.31	-0.88607	0.129872	-6.82264	8.9382e-12	3.17874e-10	AAEL003768				GO:0003676,GO:0003712,GO:0003723,GO:0005634,GO:0008134,GO:1903506	nucleic acid binding,transcription coregulator activity,RNA binding,nucleus,transcription factor binding,regulation of nucleic acid-templated transcription
LOC110675836	487.227	-1.35651	0.199418	-6.80235	1.02923e-11	3.65021e-10	AAEL021196
LOC5571542	47.353	4.88648	0.718614	6.79987	1.04715e-11	3.70357e-10	AAEL009130	cytochrome P450 [Source:VB Community Annotation]	CYP6Z7		GO:0004497,GO:0005506,GO:0016491,GO:0016705,GO:0020037,GO:0046872,GO:0055114	monooxygenase activity,iron ion binding,oxidoreductase activity,oxidoreductase activity, acting on paired donors, with incorporation or reduction of molecular oxygen,heme binding,metal ion binding,oxidation-reduction process
LOC110678000	525.093	1.07856	0.15865	6.79836	1.05813e-11	3.73217e-10	AAEL025132
LOC5568722	102.726	1.76228	0.259332	6.79546	1.07969e-11	3.79779e-10	AAEL026141
LOC5566250	145.329	3.19294	0.469988	6.79366	1.09326e-11	3.83506e-10	AAEL015109	Clip-Domain Serine Protease family D. [Source:VB Community Annotation]	CLIPD10		GO:0004252,GO:0006508	serine-type endopeptidase activity,proteolysis
LOC110675590	268.877	1.91107	0.281957	6.7779	1.21932e-11	4.26564e-10	AAEL023158
LOC5565654	904.768	-0.833514	0.122988	-6.77719	1.2254e-11	4.27527e-10	AAEL004911	DEAD box ATP-dependent RNA helicase [Source:VB Community Annotation]			GO:0000166,GO:0003676,GO:0003724,GO:0004386,GO:0005524,GO:0016787	nucleotide binding,nucleic acid binding,RNA helicase activity,helicase activity,ATP binding,hydrolase activity
LOC5570707	410.93	-1.22851	0.181567	-6.76614	1.32263e-11	4.60205e-10	AAEL001446	testis-specific protein pbs13 (t-complex 11 ) [Source:VB Community Annotation]
LOC5564801	141.789	2.12257	0.313758	6.76501	1.33303e-11	4.62572e-10	AAEL014625
LOC5574129	154.269	-2.67794	0.396209	-6.75891	1.39038e-11	4.81176e-10	AAEL010956				GO:0016020,GO:0016021,GO:0019991	membrane,integral component of membrane,septate junction assembly
LOC5567511	677.379	-1.0478	0.155126	-6.75454	1.43287e-11	4.94552e-10	AAEL024136
LOC5578499	1340.95	1.1236	0.166424	6.75145	1.46371e-11	5.03844e-10	AAEL021350	Histone H4 [Source:UniProtKB/TrEMBL;Acc:Q16IE4]
LOC5565896	88.5004	3.02657	0.449501	6.73318	1.6599e-11	5.69856e-10	AAEL000687	glucosyl/glucuronosyl transferases [Source:VB Community Annotation]			GO:0008194,GO:0015020,GO:0016020,GO:0016021,GO:0016740,GO:0016757,GO:0016758	UDP-glycosyltransferase activity,glucuronosyltransferase activity,membrane,integral component of membrane,transferase activity,transferase activity, transferring glycosyl groups,transferase activity, transferring hexosyl groups
LOC23687501	1324.95	0.859036	0.127656	6.72931	1.70469e-11	5.83675e-10	AAEL017081				GO:0005507,GO:0005758,GO:0006825,GO:0016531	copper ion binding,mitochondrial intermembrane space,copper ion transport,copper chaperone activity
LOC5579482	44.5462	2.99137	0.444624	6.72786	1.7218e-11	5.8797e-10	AAEL015305	sulfotransferase (sult) [Source:VB Community Annotation]			GO:0008146,GO:0016740	sulfotransferase activity,transferase activity
LOC110675241	104.991	-4.96903	0.738628	-6.72737	1.72759e-11	5.88385e-10	AAEL020558				GO:0005506,GO:0016705,GO:0020037,GO:0055114	iron ion binding,oxidoreductase activity, acting on paired donors, with incorporation or reduction of molecular oxygen,heme binding,oxidation-reduction process
LOC5565958	937.582	-1.22371	0.181997	-6.7238	1.77045e-11	6.01393e-10	AAEL005080	protein phosphatase-5 [Source:VB Community Annotation]			GO:0004721,GO:0005515,GO:0006470,GO:0016787,GO:0046872	phosphoprotein phosphatase activity,protein binding,protein dephosphorylation,hydrolase activity,metal ion binding
LOC5563795	143.921	2.0671	0.307827	6.71514	1.87887e-11	6.35907e-10	AAEL020747				GO:0004601,GO:0006979,GO:0020037,GO:0055114,GO:0098869	peroxidase activity,response to oxidative stress,heme binding,oxidation-reduction process,cellular oxidant detoxification
LOC5574458	302.359	2.23551	0.332918	6.7149	1.88194e-11	6.35907e-10	AAEL011180
LOC110675153	109.041	2.20679	0.328934	6.7089	1.96092e-11	6.60861e-10	AAEL025693
LOC5567787	832.452	-1.09289	0.163105	-6.70054	2.07652e-11	6.96472e-10	AAEL000118	Cleavage and polyadenylation specificity factor subunit 2 [Source:UniProtKB/TrEMBL;Acc:A0A1S4EUZ6]			GO:0003723,GO:0005634,GO:0005847,GO:0006378,GO:0006379,GO:0006397	RNA binding,nucleus,mRNA cleavage and polyadenylation specificity factor complex,mRNA polyadenylation,mRNA cleavage,mRNA processing
LOC5577288	1114.48	-0.692099	0.103291	-6.70048	2.07741e-11	6.96472e-10	AAEL013142				GO:0000166,GO:0005524	nucleotide binding,ATP binding
LOC5565951	564.399	1.60241	0.239285	6.69667	2.13221e-11	7.12989e-10	AAEL024837				GO:0003824	catalytic activity
LOC5577475	31.5735	4.91117	0.733934	6.69157	2.20792e-11	7.36394e-10	AAEL013222				GO:0005576,GO:0006030,GO:0008061	extracellular region,chitin metabolic process,chitin binding
LOC5576046	14410.1	0.602947	0.0901636	6.68725	2.27407e-11	7.56497e-10	AAEL014932	Transcription factor BTF3 [Source:UniProtKB/TrEMBL;Acc:Q1HRK3]
LOC5568568	950.282	-1.03568	0.155004	-6.68162	2.36317e-11	7.8411e-10	AAEL001142	Rab gdp/GTP exchange factor [Source:UniProtKB/TrEMBL;Acc:A0A1S4EXX1]			GO:0005096,GO:0007165,GO:0043547	GTPase activator activity,signal transduction,positive regulation of GTPase activity
LOC5575813	818.772	1.08179	0.161925	6.68079	2.37661e-11	7.86541e-10	AAEL012069	glutathione peroxidase [Source:VB Community Annotation]	GPXH1		GO:0004601,GO:0004602,GO:0006979,GO:0016491,GO:0055114,GO:0098869	peroxidase activity,glutathione peroxidase activity,response to oxidative stress,oxidoreductase activity,oxidation-reduction process,cellular oxidant detoxification
LOC5574847	72.7697	2.62397	0.39286	6.67915	2.40337e-11	7.91774e-10	AAEL011452
LOC5565059	2164.03	-0.796609	0.119269	-6.67906	2.40472e-11	7.91774e-10	AAEL004551				GO:0000777,GO:0005694,GO:0005737,GO:0005815,GO:0005856,GO:0007049,GO:0051301	condensed chromosome kinetochore,chromosome,cytoplasm,microtubule organizing center,cytoskeleton,cell cycle,cell division
LOC5571818	2553.94	-0.663575	0.099492	-6.66963	2.56442e-11	8.42202e-10	AAEL019836				GO:0003676,GO:0003723,GO:0003729	nucleic acid binding,RNA binding,mRNA binding
LOC5566597	239.24	2.15281	0.323067	6.66366	2.67085e-11	8.74923e-10	AAEL000781	E3 ubiquitin-protein ligase [Source:UniProtKB/TrEMBL;Acc:A0A1S4EWV7]			GO:0005515,GO:0005634,GO:0005737,GO:0006511,GO:0007275,GO:0008270,GO:0016567,GO:0016740,GO:0042025,GO:0046872	protein binding,nucleus,cytoplasm,ubiquitin-dependent protein catabolic process,multicellular organism development,zinc ion binding,protein ubiquitination,transferase activity,host cell nucleus,metal ion binding
LOC5574515	6500.65	0.696456	0.105096	6.62684	3.42959e-11	1.12062e-09	AAEL019717	Mitochondrial phosphate carrier protein [Source:UniProtKB/TrEMBL;Acc:Q1HQX9]			GO:0016020,GO:0016021,GO:0022857	membrane,integral component of membrane,transmembrane transporter activity
LOC5576744	17362	0.903634	0.136373	6.62621	3.44412e-11	1.12252e-09	AAEL024536	Ribosomal protein L19 [Source:UniProtKB/TrEMBL;Acc:Q1HR74]			GO:0003723,GO:0003735,GO:0005840,GO:0006412,GO:0022625	RNA binding,structural constituent of ribosome,ribosome,translation,cytosolic large ribosomal subunit
LOC110677637	920.902	-5.69988	0.86305	-6.60434	3.99296e-11	1.29812e-09	AAEL024621
LOC110677638	846.863	-5.60664	0.849153	-6.60263	4.03924e-11	1.30985e-09	AAEL021936
LOC5577349	129.364	1.65667	0.250943	6.6018	4.06186e-11	1.31388e-09	AAEL000449	acidic ribosomal protein P1, putative [Source:VB Community Annotation]	RpLP1		GO:0005840	ribosome
LOC110674211	53.4145	4.34855	0.658903	6.59969	4.12023e-11	1.32942e-09	AAEL022971
LOC5573451	1470.68	-0.698307	0.105908	-6.59353	4.29484e-11	1.38229e-09	AAEL010502	Transcriptional regulator ATRX (X-linked helicase II) [Source:UniProtKB/TrEMBL;Acc:A0A1S4FQW7]			GO:0000166,GO:0005524,GO:0005634	nucleotide binding,ATP binding,nucleus
LOC5567324	538.442	1.53923	0.233573	6.58996	4.39958e-11	1.41247e-09	AAEL019538				GO:0005515,GO:0007275,GO:0016020,GO:0030154,GO:0030215	protein binding,multicellular organism development,membrane,cell differentiation,semaphorin receptor binding
LOC110680481	182.08	3.40192	0.516772	6.58301	4.61018e-11	1.4764e-09	AAEL022256				GO:0016614,GO:0050660,GO:0055114	oxidoreductase activity, acting on CH-OH group of donors,flavin adenine dinucleotide binding,oxidation-reduction process
LOC5574148	260.009	2.36384	0.359154	6.58169	4.65128e-11	1.48587e-09	AAEL020299				GO:0005515	protein binding
LOC5573851	6536.18	0.82033	0.12471	6.57792	4.77075e-11	1.51891e-09	AAEL010777	thioredoxin (TRX), putative [Source:VB Community Annotation]			GO:0005623,GO:0006662,GO:0015035,GO:0045454,GO:0055114	obsolete cell,glycerol ether metabolic process,protein disulfide oxidoreductase activity,cell redox homeostasis,oxidation-reduction process
LOC5566598	8797.44	-1.52696	0.232142	-6.57768	4.77829e-11	1.51891e-09	AAEL000776				GO:0008270,GO:0046872	zinc ion binding,metal ion binding
LOC5564507	146.033	1.57005	0.238861	6.57304	4.92979e-11	1.5632e-09	AAEL004282	protein-(glutamine-N5) methyl transferase, putative [Source:VB Community Annotation]			GO:0003676,GO:0006479,GO:0008168,GO:0008276,GO:0016740,GO:0032259,GO:0102559	nucleic acid binding,protein methylation,methyltransferase activity,protein methyltransferase activity,transferase activity,methylation,protein-(glutamine-N5) methyltransferase activity
LOC5575867	210.577	-1.54721	0.235438	-6.57162	4.97691e-11	1.57427e-09	AAEL021432	Carboxylic ester hydrolase [Source:UniProtKB/TrEMBL;Acc:Q9TX11]			GO:0001507,GO:0003990,GO:0004104,GO:0016020,GO:0016021,GO:0016787,GO:0030054,GO:0042135,GO:0043083,GO:0045202,GO:0052689	acetylcholine catabolic process in synaptic cleft,acetylcholinesterase activity,cholinesterase activity,membrane,integral component of membrane,hydrolase activity,cell junction,neurotransmitter catabolic process,synaptic cleft,synapse,carboxylic ester hydrolase activity
LOC5573416	459.634	-0.919787	0.140021	-6.56893	5.06794e-11	1.59842e-09	AAEL002056	Cytoplasmic tRNA 2-thiolation protein 2 [Source:VB Community Annotation]			GO:0000049,GO:0002098,GO:0005737,GO:0005829,GO:0008033,GO:0016779,GO:0032447,GO:0034227	tRNA binding,tRNA wobble uridine modification,cytoplasm,cytosol,tRNA processing,nucleotidyltransferase activity,protein urmylation,tRNA thio-modification
LOC5575618	38.1873	-4.34249	0.661096	-6.56863	5.0781e-11	1.59842e-09	AAEL011957	elongase, putative [Source:VB Community Annotation]			GO:0006629,GO:0006631,GO:0006633,GO:0016020,GO:0016021,GO:0016740,GO:0102336,GO:0102337,GO:0102338,GO:0102756	lipid metabolic process,fatty acid metabolic process,fatty acid biosynthetic process,membrane,integral component of membrane,transferase activity,3-oxo-arachidoyl-CoA synthase activity,3-oxo-cerotoyl-CoA synthase activity,3-oxo-lignoceronyl-CoA synthase activity,very-long-chain 3-ketoacyl-CoA synthase activity
LOC5571797	189.11	1.63515	0.249019	6.56635	5.15635e-11	1.61909e-09	AAEL020535
LOC5578329	92.1829	-4.27368	0.650892	-6.56587	5.17291e-11	1.62034e-09	AAEL013649	elongase, putative [Source:VB Community Annotation]			GO:0006629,GO:0006631,GO:0006633,GO:0016020,GO:0016021,GO:0016740,GO:0102336,GO:0102337,GO:0102338,GO:0102756	lipid metabolic process,fatty acid metabolic process,fatty acid biosynthetic process,membrane,integral component of membrane,transferase activity,3-oxo-arachidoyl-CoA synthase activity,3-oxo-cerotoyl-CoA synthase activity,3-oxo-lignoceronyl-CoA synthase activity,very-long-chain 3-ketoacyl-CoA synthase activity
LOC5579916	37.0225	4.96651	0.756894	6.5617	5.31993e-11	1.66235e-09	AAEL001015				GO:0005634	nucleus
LOC5574466	59.3914	2.308	0.351839	6.5598	5.38803e-11	1.67955e-09	AAEL024216				GO:0016787,GO:0052689	hydrolase activity,carboxylic ester hydrolase activity
LOC110680809	459.953	-1.02087	0.155645	-6.55898	5.41773e-11	1.68473e-09	AAEL024170				GO:0046872	metal ion binding
LOC5566223	230.937	1.5424	0.235373	6.55297	5.64021e-11	1.74969e-09	AAEL029010				GO:0016021	integral component of membrane
LOC5575633	394.363	-2.91798	0.445423	-6.55104	5.71386e-11	1.76828e-09	AAEL011967	DNA photolyase [Source:VB Community Annotation]	cry2
LOC5574224	357.976	3.08952	0.472143	6.54362	6.00466e-11	1.85381e-09	AAEL018207	C-Type lectin (CTL) [Source:VB Community Annotation]	CTL8
LOC110681032	1406.69	0.938295	0.1436	6.5341	6.3993e-11	1.96504e-09	AAEL020429				GO:0015986,GO:0045261,GO:0046933	ATP synthesis coupled proton transport,proton-transporting ATP synthase complex, catalytic core F(1),proton-transporting ATP synthase activity, rotational mechanism
LOC5578118	448.712	-0.975547	0.149304	-6.53395	6.4058e-11	1.96504e-09	AAEL003438
LOC110679138	261.136	-1.59339	0.243867	-6.53383	6.41073e-11	1.96504e-09	AAEL018047				GO:0046872	metal ion binding
LOC5575992	227.65	1.73632	0.265999	6.52755	6.68533e-11	2.04435e-09	AAEL002756	synaptotagmin-4, [Source:VB Community Annotation]			GO:0016020,GO:0016021	membrane,integral component of membrane
LOC5569465	4829.56	-1.11073	0.170345	-6.52048	7.00826e-11	2.13802e-09	AAEL007657	low-density lipoprotein receptor (ldl) [Source:VB Community Annotation]			GO:0005509,GO:0005515,GO:0006897,GO:0016020,GO:0016021	calcium ion binding,protein binding,endocytosis,membrane,integral component of membrane
LOC5576419	73.8166	-3.02377	0.464151	-6.51464	7.28658e-11	2.21767e-09	AAEL012513	calcium-binding protein E63-1 [Source:VB Community Annotation]			GO:0005509	calcium ion binding
LOC5577620	790.548	-0.960603	0.147522	-6.51161	7.43503e-11	2.25751e-09	AAEL003245	IMD pathway signalling I-Kappa-B Kinase 1 (IKK1 IKK-beta). (ird5 orthologue immune response deficient 5) [Source:VB Community Annotation]	IKK1		GO:0004672,GO:0005524,GO:0006468	protein kinase activity,ATP binding,protein phosphorylation
LOC5577372	70.8298	2.7426	0.421225	6.51102	7.46408e-11	2.261e-09	AAEL000419				GO:0042302	structural constituent of cuticle
LOC110675866	64.9572	5.11765	0.786165	6.50964	7.53313e-11	2.27656e-09	AAEL023302
LOC110678905	113.689	1.5593	0.239834	6.50159	7.94771e-11	2.39623e-09	AAEL024465
LOC5567743	991.58	-0.759545	0.116863	-6.49947	8.06014e-11	2.42445e-09	AAEL021429				GO:0003779,GO:0005737,GO:0005856,GO:0005886,GO:0015031,GO:0016020,GO:0016192,GO:0030659,GO:0045010	actin binding,cytoplasm,cytoskeleton,plasma membrane,protein transport,membrane,vesicle-mediated transport,cytoplasmic vesicle membrane,actin nucleation
LOC23687758	1410.07	-0.759732	0.116906	-6.49865	8.10439e-11	2.43207e-09	AAEL017338				GO:0000165,GO:0000166,GO:0000185,GO:0004672,GO:0004674,GO:0005524,GO:0006468,GO:0008349,GO:0016301,GO:0016310,GO:0016740	MAPK cascade,nucleotide binding,activation of MAPKKK activity,protein kinase activity,protein serine/threonine kinase activity,ATP binding,protein phosphorylation,MAP kinase kinase kinase kinase activity,kinase activity,phosphorylation,transferase activity
LOC110676042	5213.46	1.08339	0.166854	6.49304	8.41187e-11	2.51847e-09	AAEL027928				GO:0046872	metal ion binding
LOC5577734	1634.09	-0.757591	0.116724	-6.49047	8.55698e-11	2.55388e-09	AAEL019516				GO:0005515	protein binding
LOC5577612	493.99	-1.11968	0.172517	-6.49024	8.56979e-11	2.55388e-09	AAEL026088				GO:0000166,GO:0005524	nucleotide binding,ATP binding
LOC5571215	78.1201	3.60242	0.555215	6.48834	8.67887e-11	2.58041e-09	AAEL007191	amino acid transporter [Source:VB Community Annotation]			GO:0016020,GO:0016021	membrane,integral component of membrane
LOC5573684	5211.2	1.08278	0.166899	6.48764	8.7191e-11	2.5864e-09	AAEL010660	alpha-B-crystallin, putative [Source:VB Community Annotation]			GO:0046872	metal ion binding
LOC110681087	3837.31	0.817274	0.126051	6.4837	8.95028e-11	2.64887e-09	AAEL025939
LOC5570978	516.307	-1.74818	0.26974	-6.48098	9.11304e-11	2.69085e-09	AAEL008705
LOC23687573	717.885	1.03406	0.159587	6.47959	9.19741e-11	2.70955e-09	AAEL028188				GO:0004869,GO:0006508,GO:0008233,GO:0008234,GO:0010951,GO:0016787	cysteine-type endopeptidase inhibitor activity,proteolysis,peptidase activity,cysteine-type peptidase activity,negative regulation of endopeptidase activity,hydrolase activity
LOC5578153	881.25	-0.83734	0.129265	-6.4777	9.31342e-11	2.73747e-09	AAEL013534	tgf-beta resistance-associated protein trag [Source:VB Community Annotation]			GO:0005515	protein binding
LOC5578696	1402.47	-1.21768	0.18803	-6.47598	9.42007e-11	2.76251e-09	AAEL025569
LOC5578348	2253.99	-0.788042	0.121972	-6.46085	1.04117e-10	3.04637e-09	AAEL003548	sulphate transporter [Source:VB Community Annotation]			GO:0008271,GO:0008272,GO:0015116,GO:0016020,GO:0016021,GO:0055085,GO:1902358	secondary active sulfate transmembrane transporter activity,sulfate transport,sulfate transmembrane transporter activity,membrane,integral component of membrane,transmembrane transport,sulfate transmembrane transport
LOC5575737	214.092	1.92655	0.2983	6.45843	1.05798e-10	3.08854e-09	AAEL019592				GO:0005509,GO:0005515,GO:0005576	calcium ion binding,protein binding,extracellular region
LOC5565541	754.66	0.866487	0.1342	6.4567	1.07008e-10	3.11678e-09	AAEL004829	NADH dehydrogenase, putative [Source:VB Community Annotation]			GO:0005739,GO:0005743,GO:0005747,GO:0016020,GO:0022904	mitochondrion,mitochondrial inner membrane,mitochondrial respiratory chain complex I,membrane,respiratory electron transport chain
LOC5575394	144.019	1.72709	0.268274	6.43779	1.21226e-10	3.52295e-09	AAEL019974				GO:0005254,GO:0005886,GO:0006811,GO:0006821,GO:0016020,GO:0016021,GO:0034707,GO:1902476	chloride channel activity,plasma membrane,ion transport,chloride transport,membrane,integral component of membrane,chloride channel complex,chloride transmembrane transport
LOC5576373	113.531	3.20494	0.498002	6.4356	1.22988e-10	3.56611e-09	AAEL025784				GO:0004553,GO:0005576,GO:0005975,GO:0008061,GO:0008152,GO:0016787,GO:0016798	hydrolase activity, hydrolyzing O-glycosyl compounds,extracellular region,carbohydrate metabolic process,chitin binding,metabolic process,hydrolase activity,hydrolase activity, acting on glycosyl bonds
LOC5568942	69.7208	3.49527	0.543768	6.42788	1.29396e-10	3.74347e-09	AAEL007226	nidogen [Source:VB Community Annotation]			GO:0005509,GO:0005604,GO:0007155,GO:0007160,GO:0016020	calcium ion binding,basement membrane,cell adhesion,cell-matrix adhesion,membrane
LOC5575816	211.634	-1.2859	0.200393	-6.4169	1.39081e-10	4.01465e-09	AAEL027091				GO:0016021,GO:0035461,GO:0051180,GO:0090482	integral component of membrane,vitamin transmembrane transport,vitamin transport,vitamin transmembrane transporter activity
LOC5569810	250.296	2.24267	0.349521	6.41642	1.39519e-10	4.01827e-09	AAEL001306
LOC5569738	1750.93	0.868642	0.135492	6.41102	1.44547e-10	4.1538e-09	AAEL007868	ubiquinol-cytochrome c reductase complex 14 kd protein [Source:VB Community Annotation]			GO:0005739,GO:0005743,GO:0005750,GO:0006122,GO:0016020,GO:0055114,GO:0070469	mitochondrion,mitochondrial inner membrane,mitochondrial respiratory chain complex III,mitochondrial electron transport, ubiquinol to cytochrome c,membrane,oxidation-reduction process,respirasome
LOC110680616	179.782	-1.51652	0.236673	-6.40765	1.47779e-10	4.23722e-09	AAEL024101				GO:0005085,GO:0007264	guanyl-nucleotide exchange factor activity,small GTPase mediated signal transduction
LOC5566989	1353.28	1.35295	0.211269	6.40394	1.51417e-10	4.33188e-09	AAEL005737				GO:0006629,GO:0016020,GO:0016021,GO:0016491,GO:0020037,GO:0046872	lipid metabolic process,membrane,integral component of membrane,oxidoreductase activity,heme binding,metal ion binding
LOC5575552	129.67	2.9176	0.456239	6.39489	1.60661e-10	4.58614e-09	AAEL002675	Arginase [Source:UniProtKB/TrEMBL;Acc:Q17HI3]			GO:0000050,GO:0004053,GO:0006525,GO:0016787,GO:0046872	urea cycle,arginase activity,arginine metabolic process,hydrolase activity,metal ion binding
LOC110678114	1225.36	0.877038	0.137224	6.3913	1.64477e-10	4.67434e-09	AAEL023799
LOC110678115	1225.36	0.877038	0.137224	6.3913	1.64477e-10	4.67434e-09	AAEL027243
LOC5568927	1952.99	-1.20097	0.187924	-6.39071	1.65121e-10	4.68229e-09	AAEL007234				GO:0003682,GO:0005634,GO:0007049,GO:0010468	chromatin binding,nucleus,cell cycle,regulation of gene expression
LOC5568471	11381.6	0.795017	0.124424	6.38956	1.66361e-10	4.70709e-09	AAEL006885	14-3-3 protein zeta [Source:UniProtKB/Swiss-Prot;Acc:Q1HR36]	14-3-3zeta		GO:0005737,GO:0019904	cytoplasm,protein domain specific binding
LOC5576354	158.247	1.31694	0.206512	6.37706	1.80519e-10	5.09648e-09	AAEL002878	NADH:ubiquinone dehydrogenase, putative [Source:VB Community Annotation]
LOC5572648	535.563	-0.814569	0.127778	-6.37488	1.8311e-10	5.15723e-09	AAEL001843	ski oncogene [Source:VB Community Annotation]			GO:0046332	SMAD binding
LOC5577582	1377.45	1.01435	0.159125	6.37457	1.83472e-10	5.15723e-09	AAEL013287				GO:0004869,GO:0010951	cysteine-type endopeptidase inhibitor activity,negative regulation of endopeptidase activity
LOC5579190	202.818	1.84832	0.289984	6.37384	1.84349e-10	5.17061e-09	AAEL003899	sugar transporter [Source:VB Community Annotation]			GO:0016020,GO:0016021,GO:0022857,GO:0055085	membrane,integral component of membrane,transmembrane transporter activity,transmembrane transport
LOC5566189	98.2292	2.86946	0.450934	6.36337	1.97373e-10	5.52387e-09	AAEL005247				GO:0000981,GO:0003677,GO:0005634,GO:0006355,GO:0006357,GO:0007275,GO:0043565	DNA-binding transcription factor activity, RNA polymerase II-specific,DNA binding,nucleus,regulation of transcription, DNA-templated,regulation of transcription by RNA polymerase II,multicellular organism development,sequence-specific DNA binding
LOC5566341	300.408	-1.43458	0.225492	-6.36197	1.99181e-10	5.56238e-09	AAEL005329
LOC5572793	1942.52	-0.819003	0.128947	-6.35145	2.13297e-10	5.94369e-09	AAEL001906	pnuts protein [Source:VB Community Annotation]			GO:0005634	nucleus
LOC5564157	1325.83	-0.876418	0.138024	-6.34976	2.15654e-10	5.9964e-09	AAEL004142	Phagocyte signaling-impaired protein (N-terminal acetyltransferase B complex subunit NAA25 homolog)(N-terminal acetyltransferase B complex subunit MDM20 homolog) [Source:VB Community Annotation]	psidin		GO:0002376,GO:0003674,GO:0005515,GO:0005764,GO:0006911,GO:0006955,GO:0045087	immune system process,molecular_function,protein binding,lysosome,phagocytosis, engulfment,immune response,innate immune response
LOC5574647	377.158	-1.20283	0.189478	-6.34813	2.17949e-10	6.04301e-09	AAEL011289				GO:0005524,GO:0016887	ATP binding,ATPase activity
LOC110676903	281.16	2.57509	0.40566	6.3479	2.18269e-10	6.04301e-09	AAEL020835
LOC5563687	1966.89	-0.621682	0.0980193	-6.34245	2.26144e-10	6.2476e-09	AAEL020625				GO:0005515,GO:0016020,GO:0016021	protein binding,membrane,integral component of membrane
LOC5577324	580.644	-0.937702	0.147878	-6.34106	2.28188e-10	6.29056e-09	AAEL000433	glypican [Source:VB Community Annotation]			GO:0005886,GO:0009966,GO:0016020,GO:0031225,GO:0046658,GO:0062023	plasma membrane,regulation of signal transduction,membrane,anchored component of membrane,anchored component of plasma membrane,collagen-containing extracellular matrix
LOC5579031	536.315	2.74066	0.432528	6.33638	2.35234e-10	6.47093e-09	AAEL013971				GO:0016020,GO:0016021,GO:0016747	membrane,integral component of membrane,transferase activity, transferring acyl groups other than amino-acyl groups
LOC5576584	1292.38	1.48726	0.234743	6.33568	2.36291e-10	6.48617e-09	AAEL027399				GO:0016020,GO:0016021	membrane,integral component of membrane
LOC5564382	323.922	-1.11387	0.175899	-6.33241	2.41368e-10	6.61142e-09	AAEL014411	cytochrome P450 [Source:VB Community Annotation]	CYP304B3		GO:0004497,GO:0005506,GO:0016491,GO:0016705,GO:0020037,GO:0046872,GO:0055114	monooxygenase activity,iron ion binding,oxidoreductase activity,oxidoreductase activity, acting on paired donors, with incorporation or reduction of molecular oxygen,heme binding,metal ion binding,oxidation-reduction process
LOC5570453	317.355	2.13443	0.337098	6.33176	2.42373e-10	6.62485e-09	AAEL008346	achaete-scute complex protein T3, putative [Source:VB Community Annotation]			GO:0003677,GO:0003700,GO:0006357,GO:0046983	DNA binding,DNA-binding transcription factor activity,regulation of transcription by RNA polymerase II,protein dimerization activity
LOC5566946	866.077	-0.799916	0.126666	-6.31516	2.69879e-10	7.36105e-09	AAEL005726	breakpoint cluster region protein (bcr) [Source:VB Community Annotation]			GO:0005085,GO:0005096,GO:0007165,GO:0030054,GO:0030424,GO:0035556,GO:0042995,GO:0043197,GO:0043547,GO:0045202	guanyl-nucleotide exchange factor activity,GTPase activator activity,signal transduction,cell junction,axon,intracellular signal transduction,cell projection,dendritic spine,positive regulation of GTPase activity,synapse
LOC110674010	55.1585	2.2738	0.360186	6.31286	2.7393e-10	7.45577e-09	AAEL019650
LOC5567660	13990.3	0.788408	0.125052	6.30464	2.88869e-10	7.84577e-09	AAEL012740	ATPase subunit, putative [Source:VB Community Annotation]			GO:0006811,GO:0008289,GO:0015078,GO:0015986,GO:0015991,GO:0016020,GO:0016021,GO:0033177,GO:0045263,GO:1902600	ion transport,lipid binding,proton transmembrane transporter activity,ATP synthesis coupled proton transport,GO_0015991,membrane,integral component of membrane,proton-transporting two-sector ATPase complex, proton-transporting domain,proton-transporting ATP synthase complex, coupling factor F(o),proton transmembrane transport
LOC110680279	908.919	-1.27876	0.202991	-6.2996	2.98415e-10	8.08799e-09	AAEL024965
LOC5578624	60.0506	2.22421	0.353105	6.29899	2.99591e-10	8.10279e-09	AAEL003597	leucine-rich transmembrane protein [Source:VB Community Annotation]			GO:0005515,GO:0016020,GO:0016021	protein binding,membrane,integral component of membrane
LOC5569787	6050.16	-1.47638	0.234406	-6.29838	3.00767e-10	8.11756e-09	AAEL023098				GO:0003723,GO:0003743,GO:0005515,GO:0006412,GO:0006413	RNA binding,translation initiation factor activity,protein binding,translation,translational initiation
LOC5571268	147.681	2.67565	0.425428	6.28931	3.18876e-10	8.58831e-09	AAEL001584				GO:0005509,GO:0016020,GO:0016021	calcium ion binding,membrane,integral component of membrane
LOC5566143	1177.55	1.33637	0.212569	6.28676	3.24167e-10	8.71259e-09	AAEL005213	Putative amino acid transporter [Source:UniProtKB/TrEMBL;Acc:A0A0P6J1D0]			GO:0016020,GO:0016021	membrane,integral component of membrane
LOC5564658	203.869	-2.86437	0.455898	-6.28293	3.32259e-10	8.91146e-09	AAEL004382
LOC5573133	2508.67	1.65032	0.262867	6.27816	3.42597e-10	9.16965e-09	AAEL001963	protein serine/threonine kinase, putative [Source:VB Community Annotation]
LOC110676521	355.741	0.991118	0.158006	6.27266	3.54936e-10	9.48019e-09	AAEL024657
LOC5567751	298.311	1.79398	0.286106	6.27032	3.60299e-10	9.60351e-09	AAEL025859				GO:0016787	hydrolase activity
LOC5577896	51.1136	3.60577	0.575448	6.26602	3.70393e-10	9.85216e-09	AAEL019427
LOC110678626	159.381	1.63114	0.260512	6.26127	3.81851e-10	1.0136e-08	AAEL026516				GO:0003676,GO:0005634,GO:0008270	nucleic acid binding,nucleus,zinc ion binding
LOC5566052	234.118	1.31752	0.210668	6.25402	4.00027e-10	1.05966e-08	AAEL005142	platelet endothelial tetraspan antigen 3 (cd151 antigen) [Source:VB Community Annotation]			GO:0016020,GO:0016021	membrane,integral component of membrane
LOC5576915	45.77	2.83161	0.452847	6.2529	4.02895e-10	1.06413e-08	AAEL012866				GO:0008080	N-acetyltransferase activity
LOC5568500	2124.91	-0.860728	0.137657	-6.25272	4.03367e-10	1.06413e-08	AAEL006910	Ubiquitination factor E4 [Source:UniProtKB/TrEMBL;Acc:A0A1S4FF65]			GO:0000151,GO:0004842,GO:0006511,GO:0016567,GO:0034450	ubiquitin ligase complex,ubiquitin-protein transferase activity,ubiquitin-dependent protein catabolic process,protein ubiquitination,ubiquitin-ubiquitin ligase activity
LOC5577904	108.243	1.76418	0.282181	6.25193	4.05401e-10	1.06731e-08	AAEL003339				GO:0003676,GO:0005634,GO:0008270,GO:0046872	nucleic acid binding,nucleus,zinc ion binding,metal ion binding
LOC5571381	329.303	1.29619	0.207385	6.25017	4.09998e-10	1.07721e-08	AAEL025929				GO:0004364,GO:0005515,GO:0005737	glutathione transferase activity,protein binding,cytoplasm
LOC5563860	49.7567	-3.77299	0.604385	-6.24269	4.30116e-10	1.12776e-08	AAEL023045
LOC5567037	2082.58	1.05866	0.169632	6.24091	4.35031e-10	1.13833e-08	AAEL005790	malic enzyme [Source:VB Community Annotation]			GO:0004470,GO:0004471,GO:0016491,GO:0046872,GO:0051287,GO:0055114	malic enzyme activity,malate dehydrogenase (decarboxylating) (NAD+) activity,oxidoreductase activity,metal ion binding,NAD binding,oxidation-reduction process
LOC5565513	2991.63	-0.860288	0.138057	-6.2314	4.62282e-10	1.20492e-08	AAEL014863	glycogenin [Source:VB Community Annotation]			GO:0016757	transferase activity, transferring glycosyl groups
LOC110675609	89.8455	2.96471	0.475771	6.23138	4.62352e-10	1.20492e-08	AAEL021795
LOC5567105	1736.14	-0.806389	0.129737	-6.21559	5.11312e-10	1.32983e-08	AAEL005827	katanin P80 subunit [Source:VB Community Annotation]			GO:0005515,GO:0005737,GO:0005856,GO:0008017,GO:0008352,GO:0051013	protein binding,cytoplasm,cytoskeleton,microtubule binding,katanin complex,microtubule severing
LOC5569083	350.244	1.69441	0.272919	6.20848	5.35002e-10	1.38863e-08	AAEL001209	sodium-dependent phosphate transporter [Source:VB Community Annotation]			GO:0016020,GO:0016021,GO:0022857,GO:0055085	membrane,integral component of membrane,transmembrane transporter activity,transmembrane transport
LOC5566514	220.538	1.84469	0.297343	6.20393	5.50712e-10	1.42653e-08	AAEL005460	alpha-galactosidase/alpha-n-acetylgalactosaminidase [Source:VB Community Annotation]			GO:0003824,GO:0004553,GO:0005975,GO:0008152,GO:0016787,GO:0016798	catalytic activity,hydrolase activity, hydrolyzing O-glycosyl compounds,carbohydrate metabolic process,metabolic process,hydrolase activity,hydrolase activity, acting on glycosyl bonds
LOC5576154	678.924	-1.14088	0.184023	-6.19966	5.65853e-10	1.46281e-08	AAEL012347				GO:0000049,GO:0003824	tRNA binding,catalytic activity
LOC5572361	32.2794	3.66266	0.59104	6.19698	5.75583e-10	1.48498e-08	AAEL009753	sodium-dependent phosphate transporter [Source:VB Community Annotation]			GO:0016020,GO:0016021,GO:0022857,GO:0042302,GO:0055085	membrane,integral component of membrane,transmembrane transporter activity,structural constituent of cuticle,transmembrane transport
LOC5565878	1222.9	0.928661	0.150049	6.18907	6.05203e-10	1.55828e-08	AAEL000679	NEDD8, putative [Source:VB Community Annotation]			GO:0005515	protein binding
LOC5570240	433.512	-1.00669	0.162998	-6.17605	6.57272e-10	1.68897e-08	AAEL008189				GO:0004672,GO:0005524,GO:0006468,GO:0035091	protein kinase activity,ATP binding,protein phosphorylation,phosphatidylinositol binding
LOC5574548	136.7	1.67143	0.270742	6.17353	6.67833e-10	1.71232e-08	AAEL011222	Class B Scavenger Receptor (CD36 domain). [Source:VB Community Annotation]	SCRB5		GO:0005886,GO:0016020,GO:0016021	plasma membrane,membrane,integral component of membrane
LOC5564056	1696.76	1.02056	0.165319	6.17325	6.69021e-10	1.71232e-08	AAEL004059	cystathionine beta-lyase [Source:VB Community Annotation]			GO:0003824,GO:0004123,GO:0019344,GO:0019346,GO:0030170,GO:0044540,GO:0080146	catalytic activity,cystathionine gamma-lyase activity,cysteine biosynthetic process,transsulfuration,pyridoxal phosphate binding,L-cystine L-cysteine-lyase (deaminating),L-cysteine desulfhydrase activity
LOC5572534	4293	0.606196	0.0982054	6.17274	6.71182e-10	1.71444e-08	AAEL009859	nucleolar GTP-binding protein [Source:VB Community Annotation]			GO:0000166,GO:0005525,GO:0005634,GO:0005730,GO:0042254	nucleotide binding,GTP binding,nucleus,nucleolus,ribosome biogenesis
LOC5567207	257.651	1.57551	0.255719	6.1611	7.22414e-10	1.84165e-08	AAEL000902	sugar transporter [Source:VB Community Annotation]			GO:0016020,GO:0016021,GO:0022857,GO:0055085	membrane,integral component of membrane,transmembrane transporter activity,transmembrane transport
LOC5572102	301.111	-1.23571	0.200762	-6.1551	7.50325e-10	1.90656e-08	AAEL009515				GO:0003677,GO:0042025	DNA binding,host cell nucleus
LOC5568745	57.7058	-2.60576	0.423357	-6.15499	7.50834e-10	1.90656e-08	AAEL007094	4-nitrophenylphosphatase [Source:UniProtKB/TrEMBL;Acc:Q0IF20]			GO:0016787	hydrolase activity
LOC5576547	5849.76	-0.847762	0.137777	-6.15316	7.59561e-10	1.92492e-08	AAEL021323				GO:0005515,GO:0005634,GO:0006357,GO:0016589,GO:0046872	protein binding,nucleus,regulation of transcription by RNA polymerase II,NURF complex,metal ion binding
LOC5576890	115.382	-2.10458	0.342354	-6.14737	7.87788e-10	1.99253e-08	AAEL003026	regulator of g protein signaling [Source:VB Community Annotation]			GO:0007186,GO:0009968,GO:0035556	G protein-coupled receptor signaling pathway,negative regulation of signal transduction,intracellular signal transduction
LOC5573470	96.8598	2.58439	0.420485	6.1462	7.93596e-10	2.00329e-08	AAEL010511				GO:0006812,GO:0006829,GO:0008324,GO:0016020,GO:0016021,GO:0055085,GO:0098655	cation transport,zinc ion transport,cation transmembrane transporter activity,membrane,integral component of membrane,transmembrane transport,cation transmembrane transport
LOC5573544	3001.99	-1.5932	0.259356	-6.14292	8.10164e-10	2.04111e-08	AAEL010593
LOC110674694	51.6422	4.11455	0.669897	6.14206	8.14598e-10	2.04827e-08	AAEL024209
LOC5578896	2124.28	-0.694618	0.113206	-6.13589	8.46857e-10	2.12523e-08	AAEL013896	smad4 [Source:VB Community Annotation]			GO:0003677,GO:0003700,GO:0005515,GO:0005634,GO:0005667,GO:0005737,GO:0006355,GO:0007179,GO:0046872	DNA binding,DNA-binding transcription factor activity,protein binding,nucleus,transcription regulator complex,cytoplasm,regulation of transcription, DNA-templated,transforming growth factor beta receptor signaling pathway,metal ion binding
LOC5571728	221.696	-3.07181	0.500861	-6.13306	8.62028e-10	2.1591e-08	AAEL009269				GO:0005515	protein binding
LOC5563575	1361.97	-0.719733	0.117447	-6.12814	8.89101e-10	2.22258e-08	AAEL000080	phosphoenolpyruvate carboxykinase [Source:VB Community Annotation]			GO:0000166,GO:0004611,GO:0004613,GO:0005525,GO:0006094,GO:0016829,GO:0016831,GO:0017076,GO:0046872	nucleotide binding,phosphoenolpyruvate carboxykinase activity,phosphoenolpyruvate carboxykinase (GTP) activity,GTP binding,gluconeogenesis,lyase activity,carboxy-lyase activity,purine nucleotide binding,metal ion binding
LOC5571877	3226	-0.780198	0.127327	-6.12754	8.92501e-10	2.22542e-08	AAEL009364	cdc2l5 [Source:VB Community Annotation]			GO:0000166,GO:0004672,GO:0004674,GO:0005524,GO:0006468	nucleotide binding,protein kinase activity,protein serine/threonine kinase activity,ATP binding,protein phosphorylation
LOC5570689	72.1841	2.4683	0.402834	6.12732	8.93693e-10	2.22542e-08	AAEL008502				GO:0003824,GO:0005975,GO:0008152,GO:0016020,GO:0016021,GO:0016798	catalytic activity,carbohydrate metabolic process,metabolic process,membrane,integral component of membrane,hydrolase activity, acting on glycosyl bonds
LOC5566516	764.755	-0.821297	0.134215	-6.11926	9.40132e-10	2.33431e-08	AAEL019553				GO:0046983	protein dimerization activity
LOC5572837	96.5326	-4.23325	0.69181	-6.1191	9.41051e-10	2.33431e-08	AAEL010061				GO:0003779,GO:0016043,GO:0030036	actin binding,cellular component organization,actin cytoskeleton organization
LOC5572054	583.143	-0.913179	0.149311	-6.11597	9.59729e-10	2.37607e-08	AAEL001710				GO:0003779,GO:0005737,GO:0005856,GO:0005912,GO:0030950,GO:0042249,GO:0051015,GO:0090251	actin binding,cytoplasm,cytoskeleton,adherens junction,establishment or maintenance of actin cytoskeleton polarity,establishment of planar polarity of embryonic epithelium,actin filament binding,protein localization involved in establishment of planar polarity
LOC5565836	188.849	2.44692	0.4002	6.11425	9.70135e-10	2.39722e-08	AAEL005017
LOC110678870	43.8778	3.16701	0.518089	6.11286	9.7861e-10	2.41353e-08	AAEL025813
LOC110676954	264.48	1.27513	0.208611	6.11251	9.80775e-10	2.41424e-08	AAEL025589
LOC5575982	496.099	2.62697	0.430511	6.10198	1.04761e-09	2.57383e-08	AAEL019430
LOC5564884	1403.15	-0.917791	0.150639	-6.09267	1.11043e-09	2.72299e-08	AAEL004474	non-receptor serine/threonine protein kinase [Source:VB Community Annotation]			GO:0000166,GO:0000287,GO:0004672,GO:0004674,GO:0005524,GO:0006468,GO:0016301,GO:0016310,GO:0016740,GO:0035556	nucleotide binding,magnesium ion binding,protein kinase activity,protein serine/threonine kinase activity,ATP binding,protein phosphorylation,kinase activity,phosphorylation,transferase activity,intracellular signal transduction
LOC5571736	6289.51	-1.00056	0.164263	-6.09124	1.12041e-09	2.74223e-08	AAEL009263				GO:0003700,GO:0006355	DNA-binding transcription factor activity,regulation of transcription, DNA-templated
LOC5563586	446.713	2.08341	0.3424	6.08473	1.16686e-09	2.85049e-08	AAEL000025	phosphoenolpyruvate carboxykinase [Source:VB Community Annotation]			GO:0000166,GO:0004611,GO:0004613,GO:0005525,GO:0006094,GO:0016829,GO:0016831,GO:0017076,GO:0046872	nucleotide binding,phosphoenolpyruvate carboxykinase activity,phosphoenolpyruvate carboxykinase (GTP) activity,GTP binding,gluconeogenesis,lyase activity,carboxy-lyase activity,purine nucleotide binding,metal ion binding
LOC5571831	68.6048	3.11816	0.512819	6.08043	1.19864e-09	2.9226e-08	AAEL025165				GO:0000981,GO:0003677,GO:0003700,GO:0005634,GO:0006355,GO:0006357,GO:0006366,GO:0007275,GO:0043565	DNA-binding transcription factor activity, RNA polymerase II-specific,DNA binding,DNA-binding transcription factor activity,nucleus,regulation of transcription, DNA-templated,regulation of transcription by RNA polymerase II,transcription by RNA polymerase II,multicellular organism development,sequence-specific DNA binding
LOC5576452	119.278	2.22317	0.365695	6.07929	1.20716e-09	2.9378e-08	AAEL012536
LOC5569448	690.182	-0.851688	0.140208	-6.07447	1.24398e-09	3.0217e-08	AAEL001244				GO:0005085	guanyl-nucleotide exchange factor activity
LOC5568263	454.756	-1.83017	0.301421	-6.07181	1.2648e-09	3.06648e-08	AAEL006687	exportin [Source:VB Community Annotation]			GO:0006886,GO:0008536	intracellular protein transport,Ran GTPase binding
LOC110680865	752.836	-1.94822	0.321197	-6.06549	1.31549e-09	3.18339e-08	AAEL021425				GO:0003676,GO:0005515	nucleic acid binding,protein binding
LOC110676235	1140.66	-0.76129	0.125551	-6.0636	1.3311e-09	3.21512e-08	AAEL022750				GO:0005515	protein binding
LOC110676214	27.8217	-4.60894	0.760677	-6.05899	1.36977e-09	3.29615e-08	AAEL025060				GO:0008270	zinc ion binding
LOC110676591	27.8217	-4.60894	0.760677	-6.05899	1.36977e-09	3.29615e-08	AAEL024234				GO:0008270	zinc ion binding
LOC5568083	204.471	2.19198	0.361875	6.0573	1.38429e-09	3.32489e-08	AAEL006534	protocadherin [Source:VB Community Annotation]			GO:0005509,GO:0005886,GO:0007155,GO:0007156,GO:0016020	calcium ion binding,plasma membrane,cell adhesion,homophilic cell adhesion via plasma membrane adhesion molecules,membrane
LOC5575822	245.36	2.11022	0.348653	6.05251	1.42607e-09	3.41884e-08	AAEL012092	leucine-rich repeat [Source:VB Community Annotation]			GO:0005515,GO:0016020,GO:0016021	protein binding,membrane,integral component of membrane
LOC5570676	208.815	2.18903	0.362068	6.04592	1.4856e-09	3.55495e-08	AAEL008472	glycerol kinase [Source:VB Community Annotation]			GO:0005975,GO:0016773	carbohydrate metabolic process,phosphotransferase activity, alcohol group as acceptor
LOC5565707	831.77	-0.771764	0.127682	-6.04442	1.49952e-09	3.58161e-08	AAEL014949				GO:0016787	hydrolase activity
LOC5578270	170.606	1.66094	0.274896	6.04206	1.52163e-09	3.62767e-08	AAEL008639				GO:0000139,GO:0005509,GO:0005794,GO:0005886,GO:0007156,GO:0016020,GO:0042995	Golgi membrane,calcium ion binding,Golgi apparatus,plasma membrane,homophilic cell adhesion via plasma membrane adhesion molecules,membrane,cell projection
LOC5575298	96.3992	2.3015	0.381382	6.03463	1.5933e-09	3.79154e-08	AAEL025736				GO:0005515	protein binding
LOC5578105	145.242	1.99772	0.331307	6.02983	1.64133e-09	3.89862e-08	AAEL003405				GO:0005515	protein binding
LOC5565906	1089.86	-0.756626	0.12552	-6.02791	1.66097e-09	3.938e-08	AAEL000719	pak-interacting exchange factor, beta-pix/cool-1 [Source:VB Community Annotation]			GO:0005085,GO:0005515	guanyl-nucleotide exchange factor activity,protein binding
LOC110675178	122.209	-1.84318	0.306275	-6.01805	1.76531e-09	4.17768e-08	AAEL026110				GO:0005886,GO:0007155	plasma membrane,cell adhesion
LOC5567450	57.9603	5.19884	0.864083	6.01659	1.78125e-09	4.20767e-08	AAEL006094				GO:0005549	odorant binding
LOC5571609	1720.94	0.819313	0.13621	6.01509	1.79783e-09	4.23406e-08	AAEL009201				GO:0016020,GO:0016021	membrane,integral component of membrane
LOC110678680	41.8889	-3.08744	0.513292	-6.01499	1.799e-09	4.23406e-08	AAEL026476
LOC5579192	64.3717	2.39265	0.397825	6.01434	1.8062e-09	4.24325e-08	AAEL003889	Gram-Negative Binding Protein (GNBP) or Beta-1 3-Glucan Binding Protein (BGBP). [Source:VB Community Annotation]	GNBPB1		GO:0004553,GO:0005975	hydrolase activity, hydrolyzing O-glycosyl compounds,carbohydrate metabolic process
LOC5578840	73.4527	-2.52449	0.420579	-6.00243	1.94387e-09	4.55836e-08	AAEL019588				GO:0005245,GO:0005515,GO:0005891,GO:0070588	voltage-gated calcium channel activity,protein binding,voltage-gated calcium channel complex,calcium ion transmembrane transport
LOC110674621	55.2296	2.13055	0.355312	5.99627	2.01896e-09	4.72584e-08	AAEL027509
LOC5576059	1938.37	-0.678575	0.113224	-5.99318	2.05774e-09	4.80788e-08	AAEL026227				GO:0005515,GO:0007049,GO:0007084,GO:0035307,GO:0051301,GO:0051721	protein binding,cell cycle,mitotic nuclear envelope reassembly,positive regulation of protein dephosphorylation,cell division,protein phosphatase 2A binding
LOC5573822	32.0237	3.17854	0.530685	5.98951	2.10468e-09	4.90863e-08	AAEL010745	four-jointed protein, putative [Source:VB Community Annotation]
LOC5570423	629.532	0.856609	0.143173	5.98301	2.19047e-09	5.09948e-08	AAEL008330	hexaprenyldihydroxybenzoate methyltransferase [Source:VB Community Annotation]			GO:0004395,GO:0005739,GO:0005743,GO:0006744,GO:0008168,GO:0008425,GO:0008689,GO:0010420,GO:0016020,GO:0016740,GO:0031314,GO:0032259,GO:0061542,GO:1990886	hexaprenyldihydroxybenzoate methyltransferase activity,mitochondrion,mitochondrial inner membrane,ubiquinone biosynthetic process,methyltransferase activity,2-polyprenyl-6-methoxy-1,4-benzoquinone methyltransferase activity,3-demethylubiquinone-9 3-O-methyltransferase activity,3,4-dihydroxy-5-polyprenylbenzoic acid O-methyltransferase activity,membrane,transferase activity,extrinsic component of …
LOC5571135	1844.34	-1.1128	0.18606	-5.98086	2.21959e-09	5.15793e-08	AAEL008829
LOC5579204	153.271	2.14805	0.359266	5.97901	2.24492e-09	5.20741e-08	AAEL014044				GO:0004888,GO:0005887,GO:0016020,GO:0016021,GO:0030195	transmembrane signaling receptor activity,integral component of plasma membrane,membrane,integral component of membrane,negative regulation of blood coagulation
LOC5567645	403.734	0.890923	0.149066	5.97669	2.27719e-09	5.26892e-08	AAEL006234	beta 1,3-galactosyltransferase [Source:VB Community Annotation]			GO:0000139,GO:0005794,GO:0006486,GO:0008378,GO:0016020,GO:0016021,GO:0016757	Golgi membrane,Golgi apparatus,protein glycosylation,galactosyltransferase activity,membrane,integral component of membrane,transferase activity, transferring glycosyl groups
LOC5569918	68.1661	-2.42093	0.405074	-5.97651	2.27963e-09	5.26892e-08	AAEL008022	homeobox protein [Source:VB Community Annotation]			GO:0000981,GO:0003677,GO:0005634,GO:0006355,GO:0006357,GO:0007275,GO:0043565	DNA-binding transcription factor activity, RNA polymerase II-specific,DNA binding,nucleus,regulation of transcription, DNA-templated,regulation of transcription by RNA polymerase II,multicellular organism development,sequence-specific DNA binding
LOC5570134	153.925	2.17804	0.364535	5.97484	2.30322e-09	5.31392e-08	AAEL008099	Procollagen-lysine,2-oxoglutarate 5-dioxygenase [Source:UniProtKB/TrEMBL;Acc:A0A1S4FIM3]			GO:0005506,GO:0008475,GO:0016491,GO:0016705,GO:0031418,GO:0046872,GO:0051213,GO:0055114	iron ion binding,procollagen-lysine 5-dioxygenase activity,oxidoreductase activity,oxidoreductase activity, acting on paired donors, with incorporation or reduction of molecular oxygen,L-ascorbic acid binding,metal ion binding,dioxygenase activity,oxidation-reduction process
LOC110678777	1359.66	-0.864976	0.144868	-5.97081	2.36083e-09	5.43709e-08	AAEL022628
LOC5578845	345.961	1.50106	0.251579	5.96653	2.42347e-09	5.57139e-08	AAEL003739	M-type 9 protein, putative [Source:VB Community Annotation]			GO:0003774,GO:0016459	motor activity,myosin complex
LOC110677731	1524.5	-1.10919	0.186097	-5.96029	2.51789e-09	5.77814e-08	AAEL021862
LOC5566327	280.062	1.21563	0.203993	5.95916	2.53536e-09	5.80787e-08	AAEL005313
LOC5574916	54.8155	2.65942	0.446354	5.95809	2.55199e-09	5.83558e-08	AAEL011519	sucrose transport protein [Source:VB Community Annotation]			GO:0016020,GO:0016021	membrane,integral component of membrane
LOC5579940	2259.09	-0.797706	0.133894	-5.95773	2.55767e-09	5.8382e-08	AAEL019732				GO:0005634,GO:0006325,GO:0008168,GO:0016740,GO:0018024,GO:0031151,GO:0032259,GO:0034729,GO:0051726	nucleus,chromatin organization,methyltransferase activity,transferase activity,histone-lysine N-methyltransferase activity,histone methyltransferase activity (H3-K79 specific),methylation,histone H3-K79 methylation,regulation of cell cycle
LOC5567615	2153.08	-0.709595	0.119124	-5.95679	2.57239e-09	5.86141e-08	AAEL006208				GO:0016567	protein ubiquitination
LOC110680907	191.406	-1.11216	0.186715	-5.95648	2.57725e-09	5.86211e-08	AAEL023781				GO:0005634,GO:0005737,GO:0008140,GO:0032793,GO:0051289	nucleus,cytoplasm,cAMP response element binding protein binding,positive regulation of CREB transcription factor activity,protein homotetramerization
LOC5569849	1091.39	-1.24177	0.208903	-5.94422	2.77768e-09	6.30417e-08	AAEL019715				GO:0005509,GO:0005515	calcium ion binding,protein binding
LOC5563837	33.5768	3.00567	0.505664	5.94401	2.78139e-09	6.30417e-08	AAEL027044
LOC5569042	779.656	0.70192	0.11813	5.94194	2.81672e-09	6.373e-08	AAEL007332	cornichon protein, putative [Source:VB Community Annotation]			GO:0016020,GO:0016021,GO:0016192	membrane,integral component of membrane,vesicle-mediated transport
LOC110678866	91.3813	1.70603	0.287145	5.94136	2.82662e-09	6.38418e-08	AAEL022759
LOC5571823	250.076	3.14863	0.530617	5.93391	2.95802e-09	6.66927e-08	AAEL001686
LOC5576948	67.5465	3.40758	0.574846	5.92782	3.06992e-09	6.90946e-08	AAEL019658				GO:0005509,GO:0016020,GO:0016021	calcium ion binding,membrane,integral component of membrane
LOC5566416	679.328	-0.845946	0.142743	-5.92634	3.09763e-09	6.95967e-08	AAEL025718				GO:0006807,GO:0016787,GO:0016811	nitrogen compound metabolic process,hydrolase activity,hydrolase activity, acting on carbon-nitrogen (but not peptide) bonds, in linear amides
LOC5564415	182.235	2.86342	0.483202	5.92593	3.10537e-09	6.96491e-08	AAEL014426	glycine dehydrogenase [Source:VB Community Annotation]			GO:0003824,GO:0004375,GO:0005739,GO:0006544,GO:0006546,GO:0016491,GO:0055114	catalytic activity,glycine dehydrogenase (decarboxylating) activity,mitochondrion,glycine metabolic process,glycine catabolic process,oxidoreductase activity,oxidation-reduction process
LOC5568195	290.285	1.55468	0.262373	5.92544	3.11461e-09	6.97347e-08	AAEL006619				GO:0004864,GO:0005737,GO:0032515,GO:0042325	protein phosphatase inhibitor activity,cytoplasm,negative regulation of phosphoprotein phosphatase activity,regulation of phosphorylation
LOC110678898	43.2955	5.53781	0.934915	5.92333	3.1548e-09	7.0512e-08	AAEL021853
LOC5567532	377.942	-0.851322	0.143742	-5.92257	3.16958e-09	7.07195e-08	AAEL006142	Hermansky-Pudlak syndrome 5 protein (Protein pink) [Source:VB Community Annotation]	pink	Hps5	GO:0005515,GO:0006622,GO:0006726,GO:0007601,GO:0031409,GO:0050896	protein binding,protein targeting to lysosome,eye pigment biosynthetic process,visual perception,pigment binding,response to stimulus
LOC5574966	4904.22	1.2434	0.210039	5.91984	3.22246e-09	7.1775e-08	AAEL002527				GO:0003824,GO:0005975,GO:0006865,GO:0008152,GO:0016020,GO:0016021,GO:0016798	catalytic activity,carbohydrate metabolic process,amino acid transport,metabolic process,membrane,integral component of membrane,hydrolase activity, acting on glycosyl bonds
LOC5573007	682.375	1.77509	0.300264	5.91176	3.38463e-09	7.52568e-08	AAEL001925				GO:0003677,GO:0005634,GO:0005737,GO:0006211,GO:0008270,GO:0016491,GO:0046872,GO:0051213,GO:0055114,GO:0070579,GO:0080111	DNA binding,nucleus,cytoplasm,5-methylcytosine catabolic process,zinc ion binding,oxidoreductase activity,metal ion binding,dioxygenase activity,oxidation-reduction process,methylcytosine dioxygenase activity,DNA demethylation
LOC5574396	280.235	2.10974	0.357214	5.90609	3.50319e-09	7.77587e-08	AAEL011130	alcohol dehydrogenase [Source:VB Community Annotation]			GO:0008270,GO:0016020,GO:0016021,GO:0016491,GO:0046872,GO:0055114	zinc ion binding,membrane,integral component of membrane,oxidoreductase activity,metal ion binding,oxidation-reduction process
LOC5576737	4064.73	-0.726334	0.123266	-5.89239	3.80646e-09	8.43449e-08	AAEL002978	leucyl aminopeptidase, putative [Source:VB Community Annotation]			GO:0004177,GO:0005737,GO:0006508,GO:0008233,GO:0008235,GO:0016787,GO:0019538,GO:0030145,GO:0070006	aminopeptidase activity,cytoplasm,proteolysis,peptidase activity,metalloexopeptidase activity,hydrolase activity,protein metabolic process,manganese ion binding,metalloaminopeptidase activity
LOC5573276	473.844	1.77781	0.302167	5.88354	4.01586e-09	8.88319e-08	AAEL010377				GO:0005634,GO:0031144,GO:0071630	nucleus,proteasome localization,nuclear protein quality control by the ubiquitin-proteasome system
LOC5578582	1607.08	0.79575	0.135275	5.88246	4.04215e-09	8.926e-08	AAEL013768	glial maturation factor [Source:VB Community Annotation]			GO:0003779,GO:0034316,GO:0071933	actin binding,negative regulation of Arp2/3 complex-mediated actin nucleation,Arp2/3 complex binding
LOC5578851	1327.72	-1.14299	0.194353	-5.88102	4.07758e-09	8.98882e-08	AAEL022689				GO:0004843,GO:0006511,GO:0016579,GO:0036459	thiol-dependent ubiquitin-specific protease activity,ubiquitin-dependent protein catabolic process,protein deubiquitination,thiol-dependent ubiquitinyl hydrolase activity
LOC110679361	881.937	-1.15438	0.196319	-5.88015	4.09906e-09	9.02073e-08	AAEL009498				GO:0003677,GO:0003899,GO:0006351,GO:0032549	DNA binding,DNA-directed 5'-3' RNA polymerase activity,transcription, DNA-templated,ribonucleoside binding
LOC5577338	16177.1	-1.19822	0.204009	-5.87339	4.26979e-09	9.38043e-08	AAEL000442	protein oskar [Source:VB Community Annotation]	osk
LOC5568353	365.699	1.92511	0.32791	5.87084	4.33605e-09	9.50977e-08	AAEL001071	glutathione S-transferase (GSTD5) [Source:VB Community Annotation]	GSTD5		GO:0005515	protein binding
LOC110674225	141.93	-1.23528	0.210466	-5.86924	4.37801e-09	9.58545e-08	AAEL026960
LOC110681325	344.377	-1.16556	0.198681	-5.86649	4.4511e-09	9.72894e-08	AAEL020349				GO:0003676	nucleic acid binding
LOC5575331	1370.12	-0.960041	0.163734	-5.86342	4.53418e-09	9.89374e-08	AAEL002586
LOC5577484	2713.84	-0.731174	0.124779	-5.85973	4.63621e-09	1.00992e-07	AAEL023716				GO:0000166,GO:0003676,GO:0003724,GO:0004386,GO:0005524,GO:0005737,GO:0007275,GO:0007283,GO:0016787,GO:0030154,GO:0031047,GO:0051321	nucleotide binding,nucleic acid binding,RNA helicase activity,helicase activity,ATP binding,cytoplasm,multicellular organism development,spermatogenesis,hydrolase activity,cell differentiation,gene silencing by RNA,meiotic cell cycle
LOC5565460	2517.72	0.769878	0.131417	5.85827	4.67719e-09	1.01713e-07	AAEL026741
LOC110677977	41.7203	2.64394	0.451444	5.85664	4.72339e-09	1.02545e-07	AAEL025759
LOC5577507	476.158	-0.911246	0.155675	-5.85351	4.81302e-09	1.04314e-07	AAEL018296				GO:0003676,GO:0005634,GO:0008270,GO:0046872	nucleic acid binding,nucleus,zinc ion binding,metal ion binding
LOC5576876	257.393	2.27911	0.389435	5.85236	4.84643e-09	1.04862e-07	AAEL003049	pupal cuticle protein 78E, putative [Source:VB Community Annotation]			GO:0042302	structural constituent of cuticle
LOC5573679	87.3674	-2.08757	0.356834	-5.85025	4.90841e-09	1.06025e-07	AAEL010677	oxidoreductase [Source:VB Community Annotation]			GO:0016491,GO:0055114	oxidoreductase activity,oxidation-reduction process
LOC5570852	138.414	2.59867	0.444447	5.84698	5.0059e-09	1.0795e-07	AAEL008632	ABC transporter [Source:VB Community Annotation]			GO:0000166,GO:0005524,GO:0016020,GO:0016021,GO:0016887,GO:0042626	nucleotide binding,ATP binding,membrane,integral component of membrane,ATPase activity,ATPase-coupled transmembrane transporter activity
LOC5578556	117.912	2.78271	0.476222	5.84329	5.11786e-09	1.1018e-07	AAEL003568	threonine dehydratase/deaminase [Source:VB Community Annotation]
LOC110681310	139.999	-1.25141	0.214599	-5.8314	5.49636e-09	1.1813e-07	AAEL023742				GO:0016021,GO:0051180,GO:0090482	integral component of membrane,vitamin transport,vitamin transmembrane transporter activity
LOC110678855	33.3177	5.80258	0.995266	5.83017	5.53694e-09	1.18804e-07	AAEL025367
LOC5579654	80.8443	2.73579	0.469365	5.8287	5.58613e-09	1.1966e-07	AAEL003970	amino acid transporter [Source:VB Community Annotation]			GO:0016020,GO:0016021	membrane,integral component of membrane
LOC5575411	1563.77	-0.842323	0.144634	-5.82383	5.75141e-09	1.22996e-07	AAEL011817	nonsense-mediated mRNA decay protein 1 (rent1) [Source:VB Community Annotation]			GO:0000184,GO:0003677,GO:0004386,GO:0005524,GO:0005737,GO:0008270	nuclear-transcribed mRNA catabolic process, nonsense-mediated decay,DNA binding,helicase activity,ATP binding,cytoplasm,zinc ion binding
LOC5565770	1025.58	-0.93226	0.160099	-5.82304	5.77882e-09	1.23377e-07	AAEL004986	smg-7 (suppressor with morphological effect on genitalia protein 7) [Source:VB Community Annotation]			GO:0000184,GO:0005515,GO:0005737	nuclear-transcribed mRNA catabolic process, nonsense-mediated decay,protein binding,cytoplasm
LOC5574508	2118.62	-0.659731	0.113435	-5.81595	6.02893e-09	1.28504e-07	AAEL002369				GO:0005634,GO:0006355	nucleus,regulation of transcription, DNA-templated
LOC5566099	2751.91	-0.860468	0.148013	-5.81345	6.11987e-09	1.30227e-07	AAEL015065	spectrin [Source:VB Community Annotation]			GO:0003779,GO:0005509,GO:0005515,GO:0005516,GO:0005737,GO:0005856,GO:0051693	actin binding,calcium ion binding,protein binding,calmodulin binding,cytoplasm,cytoskeleton,actin filament capping
LOC5564815	908.455	-0.787821	0.135574	-5.81098	6.21073e-09	1.31942e-07	AAEL027444				GO:0005216,GO:0005220,GO:0005262,GO:0005783,GO:0005789,GO:0006811,GO:0006816,GO:0016020,GO:0016021,GO:0048016,GO:0055085,GO:0070588,GO:0070679	ion channel activity,inositol 1,4,5-trisphosphate-sensitive calcium-release channel activity,calcium channel activity,endoplasmic reticulum,endoplasmic reticulum membrane,ion transport,calcium ion transport,membrane,integral component of membrane,inositol phosphate-mediated signaling,transmembrane transport,calcium ion transmembrane transport,inositol 1,4,5 trisphosphate binding
LOC5578735	1037.65	-0.793328	0.136547	-5.80994	6.2494e-09	1.32545e-07	AAEL003647	GPCR Neurokinin/Tachykinin Family [Source:VB Community Annotation]	GPRNPR3		GO:0004930,GO:0004983,GO:0007165,GO:0007186,GO:0007218,GO:0016020,GO:0016021	G protein-coupled receptor activity,neuropeptide Y receptor activity,signal transduction,G protein-coupled receptor signaling pathway,neuropeptide signaling pathway,membrane,integral component of membrane
LOC5577461	2408.42	-0.978983	0.168608	-5.80625	6.38873e-09	1.35277e-07	AAEL013203				GO:0004843,GO:0006511,GO:0016579,GO:0036459	thiol-dependent ubiquitin-specific protease activity,ubiquitin-dependent protein catabolic process,protein deubiquitination,thiol-dependent ubiquitinyl hydrolase activity
LOC5572676	187.254	2.13216	0.367323	5.80459	6.45232e-09	1.36399e-07	AAEL022179				GO:0000981,GO:0003677,GO:0003700,GO:0005634,GO:0006355,GO:0006357,GO:0007275,GO:0043565	DNA-binding transcription factor activity, RNA polymerase II-specific,DNA binding,DNA-binding transcription factor activity,nucleus,regulation of transcription, DNA-templated,regulation of transcription by RNA polymerase II,multicellular organism development,sequence-specific DNA binding
LOC5567836	2762.92	-0.711527	0.122983	-5.78559	7.22597e-09	1.52504e-07	AAEL001009	dab2-interacting protein [Source:VB Community Annotation]			GO:0005515,GO:0016301,GO:0016310	protein binding,kinase activity,phosphorylation
LOC5572813	244.283	1.63245	0.282261	5.78347	7.31733e-09	1.54179e-07	AAEL019903				GO:0030246	carbohydrate binding
LOC5564419	100.083	2.48042	0.429194	5.77925	7.50349e-09	1.57843e-07	AAEL019808				GO:0003677,GO:0003700,GO:0005634,GO:0006355	DNA binding,DNA-binding transcription factor activity,nucleus,regulation of transcription, DNA-templated
LOC5574556	510.455	-2.59017	0.448355	-5.77706	7.60173e-09	1.59649e-07	AAEL011231				GO:0003677,GO:0003700,GO:0005634,GO:0006355,GO:0008270,GO:0042025,GO:0043565,GO:0046872	DNA binding,DNA-binding transcription factor activity,nucleus,regulation of transcription, DNA-templated,zinc ion binding,host cell nucleus,sequence-specific DNA binding,metal ion binding
LOC5571852	764.846	0.68263	0.118275	5.77154	7.85504e-09	1.647e-07	AAEL009339	activin receptor type I, putative [Source:VB Community Annotation]			GO:0000166,GO:0004672,GO:0004675,GO:0005524,GO:0006468,GO:0007178,GO:0016020,GO:0016021,GO:0016301,GO:0016310,GO:0016740	nucleotide binding,protein kinase activity,transmembrane receptor protein serine/threonine kinase activity,ATP binding,protein phosphorylation,transmembrane receptor protein serine/threonine kinase signaling pathway,membrane,integral component of membrane,kinase activity,phosphorylation,transferase activity
LOC5575051	1496.53	-0.625961	0.108506	-5.76888	7.97983e-09	1.67045e-07	AAEL025664				GO:0004672,GO:0005524,GO:0006468,GO:0007094	protein kinase activity,ATP binding,protein phosphorylation,mitotic spindle assembly checkpoint
LOC5578703	505.403	-1.1119	0.192912	-5.76377	8.22574e-09	1.71639e-07	AAEL013822				GO:0006281,GO:0032508,GO:0043138,GO:0043140	DNA repair,DNA duplex unwinding,3'-5' DNA helicase activity,GO_0043140
LOC110676861	66.9672	3.92134	0.680344	5.76376	8.22598e-09	1.71639e-07	AAEL023187				GO:0005201,GO:0005581	extracellular matrix structural constituent,collagen trimer
LOC5572090	12066.2	0.726652	0.126091	5.76292	8.26723e-09	1.72221e-07	AAEL009496	40S ribosomal protein S7 [Source:UniProtKB/TrEMBL;Acc:Q0IEM1]	RpS7		GO:0003735,GO:0005840,GO:0006412	structural constituent of ribosome,ribosome,translation
LOC5568338	104.786	-2.90937	0.505056	-5.7605	8.38668e-09	1.74427e-07	AAEL001060				GO:0005886,GO:0016020,GO:0016021	plasma membrane,membrane,integral component of membrane
LOC110675343	458.09	0.816349	0.141808	5.7567	8.57734e-09	1.78104e-07	AAEL024690				GO:0004222,GO:0006508,GO:0008233,GO:0008237,GO:0016787,GO:0046872	metalloendopeptidase activity,proteolysis,peptidase activity,metallopeptidase activity,hydrolase activity,metal ion binding
LOC5564406	45.6471	5.24874	0.911919	5.75571	8.62793e-09	1.78866e-07	AAEL004245	GPCR Orphan/Putative Class A Family [Source:VB Community Annotation]	GPRNNA19_1		GO:0000786,GO:0003677,GO:0004930,GO:0006334,GO:0007165,GO:0007186,GO:0016020,GO:0016021,GO:0042025	nucleosome,DNA binding,G protein-coupled receptor activity,nucleosome assembly,signal transduction,G protein-coupled receptor signaling pathway,membrane,integral component of membrane,host cell nucleus
LOC5575484	601.226	-0.814012	0.141543	-5.75098	8.87256e-09	1.83642e-07	AAEL011862
LOC5568153	293.062	2.08475	0.362603	5.7494	8.95601e-09	1.85072e-07	AAEL006593				GO:0000981,GO:0003677,GO:0005634,GO:0006355,GO:0006357,GO:0043565	DNA-binding transcription factor activity, RNA polymerase II-specific,DNA binding,nucleus,regulation of transcription, DNA-templated,regulation of transcription by RNA polymerase II,sequence-specific DNA binding
LOC5563780	1230.92	-1.42675	0.248216	-5.74802	9.02935e-09	1.86288e-07	AAEL019562				GO:0003676,GO:0005515	nucleic acid binding,protein binding
LOC5568947	95.7608	2.5663	0.446813	5.74356	9.27074e-09	1.90962e-07	AAEL007233	zinc finger protein [Source:VB Community Annotation]			GO:0003676	nucleic acid binding
LOC5568944	235.951	1.13478	0.197616	5.74234	9.33749e-09	1.9203e-07	AAEL007243	valacyclovir hydrolase [Source:VB Community Annotation]
LOC5566544	704.147	0.851274	0.148263	5.74165	9.37584e-09	1.92511e-07	AAEL005474
LOC5571445	388.122	0.914535	0.159317	5.74033	9.44909e-09	1.93706e-07	AAEL009075				GO:0005637,GO:0016020,GO:0016021	nuclear inner membrane,membrane,integral component of membrane
LOC5577754	103.157	-1.96041	0.341978	-5.73255	9.89311e-09	2.02486e-07	AAEL018298
LOC5566461	1186.07	-0.765678	0.133576	-5.73216	9.91571e-09	2.02627e-07	AAEL005425				GO:0004672,GO:0005524,GO:0006468,GO:0016301,GO:0016310	protein kinase activity,ATP binding,protein phosphorylation,kinase activity,phosphorylation
LOC5576251	1123.51	-0.65074	0.113541	-5.73132	9.96516e-09	2.033e-07	AAEL012409	pantothenate kinase [Source:VB Community Annotation]			GO:0000166,GO:0004594,GO:0005524,GO:0015937,GO:0016310	nucleotide binding,pantothenate kinase activity,ATP binding,coenzyme A biosynthetic process,phosphorylation
LOC5577381	375.399	-1.27567	0.222596	-5.73087	9.99181e-09	2.033e-07	AAEL000434	lipid a export ATP-binding/permease protein msba [Source:VB Community Annotation]			GO:0000166,GO:0005524,GO:0016020,GO:0016021,GO:0016887,GO:0042626,GO:0055085	nucleotide binding,ATP binding,membrane,integral component of membrane,ATPase activity,ATPase-coupled transmembrane transporter activity,transmembrane transport
LOC5574419	1146.01	-1.00222	0.174883	-5.7308	9.99601e-09	2.033e-07	AAEL018212	Ubiquitinyl hydrolase 1 [Source:UniProtKB/TrEMBL;Acc:A0A1S4G7V5]			GO:0004843,GO:0006511,GO:0008270,GO:0016579,GO:0036459,GO:0046872	thiol-dependent ubiquitin-specific protease activity,ubiquitin-dependent protein catabolic process,zinc ion binding,protein deubiquitination,thiol-dependent ubiquitinyl hydrolase activity,metal ion binding
LOC5570578	3378.72	-1.06585	0.186089	-5.72763	1.01845e-08	2.06775e-07	AAEL008389	ankyrin repeat-rich membrane-spanning protein [Source:VB Community Annotation]			GO:0005515,GO:0016020,GO:0016021	protein binding,membrane,integral component of membrane
LOC5577544	792.552	0.86082	0.150299	5.72739	1.0199e-08	2.06775e-07	AAEL013256
LOC5566289	2453.78	-0.536296	0.0936774	-5.72493	1.03478e-08	2.09461e-07	AAEL018120	Ribosomal protein S6 kinase [Source:UniProtKB/TrEMBL;Acc:Q535V4]			GO:0000166,GO:0004672,GO:0004674,GO:0005515,GO:0005524,GO:0006468,GO:0007165,GO:0016301,GO:0016310,GO:0016740	nucleotide binding,protein kinase activity,protein serine/threonine kinase activity,protein binding,ATP binding,protein phosphorylation,signal transduction,kinase activity,phosphorylation,transferase activity
LOC5577631	758.01	-0.950537	0.166136	-5.72144	1.05625e-08	2.13471e-07	AAEL003229				GO:0000281,GO:0000724,GO:0032266,GO:0046872	mitotic cytokinesis,double-strand break repair via homologous recombination,phosphatidylinositol-3-phosphate binding,metal ion binding
LOC5573441	1056.4	-0.799378	0.139837	-5.71648	1.08751e-08	2.19446e-07	AAEL010483	oxysterol-binding protein related protein (ORP8) [Source:VB Community Annotation]	ORP8		GO:0006869,GO:0008289,GO:0016020,GO:0016021	lipid transport,lipid binding,membrane,integral component of membrane
LOC5564540	2406.22	-0.578149	0.101224	-5.71157	1.11939e-08	2.25524e-07	AAEL020341				GO:0003677,GO:0005515,GO:0051301	DNA binding,protein binding,cell division
LOC5567565	1329.1	1.14345	0.200352	5.70721	1.14844e-08	2.31016e-07	AAEL006169	Lysosomal aspartic protease Precursor (EC 3.4.23.-) [Source:VB Community Annotation]			GO:0004190,GO:0005764,GO:0006508,GO:0008233,GO:0016787	aspartic-type endopeptidase activity,lysosome,proteolysis,peptidase activity,hydrolase activity
LOC5567313	827.011	-1.13848	0.199531	-5.7058	1.15798e-08	2.32571e-07	AAEL005958	oxidoreductase [Source:VB Community Annotation]			GO:0016491,GO:0055114	oxidoreductase activity,oxidation-reduction process
LOC5575670	1201.44	-0.606212	0.106317	-5.70193	1.18459e-08	2.37544e-07	AAEL022091
LOC5577913	54.846	4.48608	0.78747	5.69683	1.22055e-08	2.44376e-07	AAEL003358
LOC5578236	352.605	1.66932	0.293055	5.69628	1.22453e-08	2.44792e-07	AAEL016972				GO:0006869,GO:0007568,GO:0008289	lipid transport,aging,lipid binding
LOC5574457	87.872	2.22653	0.390953	5.69512	1.23286e-08	2.46075e-07	AAEL011174	gustatory receptor Gr11 [Source:VB Community Annotation]	Gr11	GPRgr11	GO:0005886,GO:0008527,GO:0016020,GO:0016021,GO:0050912	plasma membrane,taste receptor activity,membrane,integral component of membrane,detection of chemical stimulus involved in sensory perception of taste
LOC5571582	263.049	1.73666	0.305664	5.68158	1.33459e-08	2.65967e-07	AAEL009171				GO:0003700,GO:0006355,GO:0006986	DNA-binding transcription factor activity,regulation of transcription, DNA-templated,response to unfolded protein
LOC5575417	3665.11	-0.555961	0.0979004	-5.67885	1.35606e-08	2.6976e-07	AAEL011811	DNA replication licensing factor MCM3 [Source:VB Community Annotation]			GO:0000166,GO:0003677,GO:0003678,GO:0004386,GO:0005524,GO:0005634,GO:0006260,GO:0006270,GO:0016787,GO:0032508,GO:0042555	nucleotide binding,DNA binding,DNA helicase activity,helicase activity,ATP binding,nucleus,DNA replication,DNA replication initiation,hydrolase activity,DNA duplex unwinding,MCM complex
LOC5574826	601.922	-0.850545	0.14978	-5.67863	1.35781e-08	2.6976e-07	AAEL002465				GO:0003824,GO:0005789,GO:0006506,GO:0016020,GO:0016021,GO:0016772,GO:0051377	catalytic activity,endoplasmic reticulum membrane,GPI anchor biosynthetic process,membrane,integral component of membrane,transferase activity, transferring phosphorus-containing groups,mannose-ethanolamine phosphotransferase activity
LOC5579903	30.7289	3.87907	0.684095	5.67037	1.42493e-08	2.82659e-07	AAEL001022	anterior fat body protein [Source:VB Community Annotation]
LOC5572212	108.757	2.24646	0.396332	5.66813	1.44362e-08	2.85926e-07	AAEL009616	cadherin [Source:VB Community Annotation]			GO:0005509,GO:0005886,GO:0007155,GO:0007156,GO:0016020,GO:0016021,GO:0098609	calcium ion binding,plasma membrane,cell adhesion,homophilic cell adhesion via plasma membrane adhesion molecules,membrane,integral component of membrane,cell-cell adhesion
LOC5567416	34.7164	-2.92635	0.516357	-5.6673	1.45063e-08	2.86873e-07	AAEL025156
LOC110679698	45.1202	8.11347	1.43186	5.66637	1.45856e-08	2.8775e-07	AAEL026437
LOC5569499	2083.19	-0.863281	0.152355	-5.66625	1.45954e-08	2.8775e-07	AAEL007692				GO:0003677,GO:0005634,GO:0006260	DNA binding,nucleus,DNA replication
LOC110674521	24.1136	3.67197	0.64947	5.65379	1.56945e-08	3.08947e-07	AAEL022894
LOC110675420	339.095	-0.983563	0.173984	-5.65317	1.57516e-08	3.09598e-07	AAEL021308				GO:0003676,GO:0003700,GO:0005634,GO:0006355,GO:0008270,GO:0046872	nucleic acid binding,DNA-binding transcription factor activity,nucleus,regulation of transcription, DNA-templated,zinc ion binding,metal ion binding
LOC5567491	7140.78	0.753399	0.133318	5.65114	1.59387e-08	3.12796e-07	AAEL000951	elongation factor 1-beta2 [Source:VB Community Annotation]			GO:0003746,GO:0005853,GO:0006412,GO:0006414	translation elongation factor activity,eukaryotic translation elongation factor 1 complex,translation,translational elongation
LOC110677101	38.2875	2.99288	0.529881	5.64821	1.62124e-08	3.17685e-07	AAEL023790
LOC5573931	19.7052	-7.62116	1.34961	-5.64695	1.6332e-08	3.19542e-07	AAEL002237	fatty acid synthase [Source:VB Community Annotation]			GO:0003824,GO:0004312,GO:0004313,GO:0004315,GO:0004316,GO:0004317,GO:0004320,GO:0006631,GO:0006633,GO:0008152,GO:0008659,GO:0008693,GO:0009058,GO:0016295,GO:0016296,GO:0016297,GO:0016418,GO:0016491,GO:0016740,GO:0016746,GO:0016788,GO:0016829,GO:0019171,GO:0031177,GO:0047117,GO:0047451,GO:0055114,GO:0102131,GO:0102132	catalytic activity,fatty acid synthase activity,[acyl-carrier-protein] S-acetyltransferase activity,3-oxoacyl-[acyl-carrier-protein] synthase activity,3-oxoacyl-[acyl-carrier-protein] reductase (NADPH) activity,3-hydroxypalmitoyl-[acyl-carrier-protein] dehydratase activity,oleoyl-[acyl-carrier-protein] hydrolase activity,fatty acid metabolic process,fatty acid biosynthetic process,metabolic proce…
LOC5565231	73.7126	2.05244	0.363733	5.6427	1.67407e-08	3.27041e-07	AAEL004667
LOC5577930	4202.19	-0.645255	0.114379	-5.64137	1.68707e-08	3.29081e-07	AAEL025363				GO:0003958,GO:0005737,GO:0005783,GO:0005789,GO:0010181,GO:0016020,GO:0016021,GO:0016491,GO:0050660,GO:0050661,GO:0055114	NADPH-hemoprotein reductase activity,cytoplasm,endoplasmic reticulum,endoplasmic reticulum membrane,FMN binding,membrane,integral component of membrane,oxidoreductase activity,flavin adenine dinucleotide binding,NADP binding,oxidation-reduction process
LOC5563947	469.298	-0.905169	0.160467	-5.64084	1.69223e-08	3.29589e-07	AAEL019975				GO:0005515	protein binding
LOC5577067	351.876	1.75091	0.310602	5.63716	1.72879e-08	3.36201e-07	AAEL003093	elongase, putative [Source:VB Community Annotation]			GO:0006629,GO:0006631,GO:0006633,GO:0016020,GO:0016021,GO:0016740,GO:0102336,GO:0102337,GO:0102338,GO:0102756	lipid metabolic process,fatty acid metabolic process,fatty acid biosynthetic process,membrane,integral component of membrane,transferase activity,3-oxo-arachidoyl-CoA synthase activity,3-oxo-cerotoyl-CoA synthase activity,3-oxo-lignoceronyl-CoA synthase activity,very-long-chain 3-ketoacyl-CoA synthase activity
LOC5568141	2224.19	-0.576233	0.102267	-5.63457	1.75493e-08	3.40769e-07	AAEL006582	calcium-transporting ATPase sarcoplasmic/endoplasmic reticulum type [Source:VB Community Annotation]			GO:0000166,GO:0005388,GO:0005524,GO:0005783,GO:0006811,GO:0006816,GO:0016020,GO:0016021,GO:0016529,GO:0033017,GO:0046872,GO:0070588	nucleotide binding,calcium transmembrane transporter activity, phosphorylative mechanism,ATP binding,endoplasmic reticulum,ion transport,calcium ion transport,membrane,integral component of membrane,sarcoplasmic reticulum,sarcoplasmic reticulum membrane,metal ion binding,calcium ion transmembrane transport
LOC5568625	16.2535	7.60752	1.35058	5.63278	1.77329e-08	3.43815e-07	AAEL006975	leucine aminopeptidase [Source:VB Community Annotation]			GO:0004177,GO:0005737,GO:0006508,GO:0008233,GO:0008235,GO:0016787,GO:0019538,GO:0030145,GO:0070006	aminopeptidase activity,cytoplasm,proteolysis,peptidase activity,metalloexopeptidase activity,hydrolase activity,protein metabolic process,manganese ion binding,metalloaminopeptidase activity
LOC5577912	24.1808	8.17947	1.45274	5.63036	1.79829e-08	3.48139e-07	AAEL003351
LOC5578728	160.996	1.93814	0.344291	5.62937	1.80868e-08	3.49623e-07	AAEL013840				GO:0007165,GO:0008083,GO:0016020	signal transduction,growth factor activity,membrane
LOC5571940	899.67	1.08946	0.194026	5.61503	1.96532e-08	3.79333e-07	AAEL009423	Class B Scavenger Receptor (CD36 domain). [Source:VB Community Annotation]	SCRBQ2		GO:0005886,GO:0016020,GO:0016021	plasma membrane,membrane,integral component of membrane
LOC110680313	80.7946	-1.59569	0.284233	-5.61403	1.97664e-08	3.80542e-07	AAEL022278
LOC5579129	81.0522	2.61671	0.466108	5.61396	1.97749e-08	3.80542e-07	AAEL014006				GO:0003676	nucleic acid binding
LOC5569804	1375.95	-0.760419	0.135464	-5.61345	1.98335e-08	3.81099e-07	AAEL024618				GO:0005634,GO:0016020,GO:0016021	nucleus,membrane,integral component of membrane
LOC5573450	773.413	-0.929227	0.165558	-5.6127	1.99195e-08	3.82182e-07	AAEL019574				GO:0000166,GO:0005524,GO:0005634	nucleotide binding,ATP binding,nucleus
LOC5570317	2919.91	-0.877754	0.1564	-5.61225	1.99713e-08	3.82604e-07	AAEL008247	DNA polymerase alpha catalytic subunit [Source:VB Community Annotation]			GO:0000166,GO:0001882,GO:0003676,GO:0003677,GO:0003887,GO:0005634,GO:0006260,GO:0016740,GO:0016779,GO:0046872,GO:0051536,GO:0051539,GO:0071897	nucleotide binding,nucleoside binding,nucleic acid binding,DNA binding,DNA-directed DNA polymerase activity,nucleus,DNA replication,transferase activity,nucleotidyltransferase activity,metal ion binding,iron-sulfur cluster binding,4 iron, 4 sulfur cluster binding,DNA biosynthetic process
LOC5577561	4273.98	-0.695113	0.123958	-5.60763	2.05114e-08	3.92368e-07	AAEL013275	importin beta-1 [Source:VB Community Annotation]			GO:0005623,GO:0005737,GO:0006606,GO:0006886,GO:0008536,GO:0015031	obsolete cell,cytoplasm,protein import into nucleus,intracellular protein transport,Ran GTPase binding,protein transport
LOC110675933	60.8888	2.29612	0.409539	5.60659	2.0635e-08	3.94147e-07	AAEL023669
LOC5566539	843.41	-0.655083	0.116891	-5.60424	2.09175e-08	3.9895e-07	AAEL005473
LOC5569248	73.329	2.70895	0.48384	5.59887	2.1576e-08	4.10901e-07	AAEL007502	iroquois-class homeodomain protein irx [Source:VB Community Annotation]			GO:0000981,GO:0003677,GO:0005634,GO:0006355,GO:0006357,GO:0043565	DNA-binding transcription factor activity, RNA polymerase II-specific,DNA binding,nucleus,regulation of transcription, DNA-templated,regulation of transcription by RNA polymerase II,sequence-specific DNA binding
LOC110679051	72.4982	-2.50364	0.447353	-5.59656	2.1865e-08	4.1579e-07	AAEL020538
LOC5571717	1468.61	-0.8654	0.154638	-5.59629	2.1899e-08	4.15822e-07	AAEL009238				GO:0005739,GO:0047631	mitochondrion,ADP-ribose diphosphatase activity
LOC110681469	32.1218	3.0999	0.554056	5.59491	2.2073e-08	4.17894e-07	AAEL027797				GO:0000786,GO:0003677,GO:0005634,GO:0005694,GO:0006334,GO:0042025	nucleosome,DNA binding,nucleus,chromosome,nucleosome assembly,host cell nucleus
LOC5575530	32.1218	3.0999	0.554056	5.59491	2.2073e-08	4.17894e-07	AAEL011906	histone H1, putative [Source:VB Community Annotation]			GO:0000786,GO:0003677,GO:0005634,GO:0005694,GO:0006334,GO:0042025	nucleosome,DNA binding,nucleus,chromosome,nucleosome assembly,host cell nucleus
LOC5577238	117.982	-2.38481	0.426358	-5.59346	2.2259e-08	4.20797e-07	AAEL003137				GO:0005509,GO:0016020,GO:0016021	calcium ion binding,membrane,integral component of membrane
LOC5573304	34.319	2.7694	0.495278	5.59162	2.24966e-08	4.24127e-07	AAEL010398
LOC5564323	2217.29	1.16113	0.207658	5.59158	2.2501e-08	4.24127e-07	AAEL000572	AMP dependent ligase [Source:UniProtKB/TrEMBL;Acc:A0A1S4EW84]			GO:0003824,GO:0016020,GO:0016021	catalytic activity,membrane,integral component of membrane
LOC110676510	192.266	-1.03905	0.186059	-5.58452	2.34345e-08	4.40983e-07	AAEL023510
LOC5577233	35.9787	3.63777	0.651443	5.58416	2.34826e-08	4.40983e-07	AAEL003139	short-chain dehydrogenase [Source:VB Community Annotation]			GO:0016020,GO:0016021,GO:0055114	membrane,integral component of membrane,oxidation-reduction process
LOC110677716	32.0035	2.77436	0.496837	5.58405	2.34981e-08	4.40983e-07	AAEL027229
LOC110675535	119.543	2.99405	0.536896	5.57659	2.45285e-08	4.59651e-07	AAEL024066
LOC5566864	401.889	0.895956	0.160873	5.56935	2.55685e-08	4.78443e-07	AAEL000847
LOC5570235	345.311	-0.963319	0.17312	-5.56445	2.62986e-08	4.91391e-07	AAEL008178	DNA replication licensing factor MCM1 [Source:VB Community Annotation]			GO:0000166,GO:0003677,GO:0003678,GO:0004386,GO:0005524,GO:0006260,GO:0006270,GO:0032508	nucleotide binding,DNA binding,DNA helicase activity,helicase activity,ATP binding,DNA replication,DNA replication initiation,DNA duplex unwinding
LOC5572472	182.233	1.79151	0.322243	5.55948	2.70577e-08	5.04841e-07	AAEL009818				GO:0008080,GO:0016747	N-acetyltransferase activity,transferase activity, transferring acyl groups other than amino-acyl groups
LOC5564636	5165.95	0.594001	0.106879	5.5577	2.73357e-08	5.0929e-07	AAEL004378	eukaryotic translation initiation factor 1A (eIF-1A) [Source:VB Community Annotation]			GO:0003723,GO:0003743,GO:0006412,GO:0006413	RNA binding,translation initiation factor activity,translation,translational initiation
LOC5571296	2114.36	-0.814853	0.146714	-5.55404	2.79142e-08	5.19317e-07	AAEL001549	protein kinase c [Source:VB Community Annotation]			GO:0000166,GO:0004672,GO:0004674,GO:0004697,GO:0004698,GO:0005524,GO:0006468,GO:0007165,GO:0016301,GO:0016310,GO:0016740,GO:0017049	nucleotide binding,protein kinase activity,protein serine/threonine kinase activity,protein kinase C activity,calcium-dependent protein kinase C activity,ATP binding,protein phosphorylation,signal transduction,kinase activity,phosphorylation,transferase activity,GTP-Rho binding
LOC5574137	1094.24	1.89214	0.340812	5.55184	2.82683e-08	5.25147e-07	AAEL010944
LOC5574113	460.958	0.806918	0.145494	5.54605	2.92196e-08	5.42036e-07	AAEL002249				GO:0004519,GO:0006364,GO:0090305,GO:0090730	endonuclease activity,rRNA processing,nucleic acid phosphodiester bond hydrolysis,Las1 complex
LOC5564097	126.565	2.98595	0.53861	5.54382	2.95951e-08	5.48211e-07	AAEL014318				GO:0016020,GO:0016021	membrane,integral component of membrane
LOC5569841	1329.65	-0.734376	0.132477	-5.54343	2.96611e-08	5.48645e-07	AAEL007939				GO:0005634,GO:0006260,GO:0006270,GO:0007049	nucleus,DNA replication,DNA replication initiation,cell cycle
LOC5566877	80.2709	1.86551	0.336686	5.54081	3.01075e-08	5.56104e-07	AAEL000811	GPCR Methuselah Family [Source:VB Community Annotation]	GPRMTH7		GO:0016020,GO:0016021	membrane,integral component of membrane
LOC110679126	467.705	-1.13301	0.204555	-5.5389	3.04385e-08	5.61411e-07	AAEL020300				GO:0005515	protein binding
LOC5578265	689.972	-0.777857	0.140551	-5.53433	3.12416e-08	5.75401e-07	AAEL003493	GDI interacting protein, putative [Source:VB Community Annotation]			GO:0005515	protein binding
LOC5574825	529.686	-1.03602	0.187255	-5.5327	3.15344e-08	5.79962e-07	AAEL022941				GO:0000166,GO:0005524,GO:0016020,GO:0016021,GO:0016887,GO:0042626,GO:0055085	nucleotide binding,ATP binding,membrane,integral component of membrane,ATPase activity,ATPase-coupled transmembrane transporter activity,transmembrane transport
LOC5574643	1409.11	-0.644898	0.116573	-5.53216	3.16308e-08	5.80905e-07	AAEL011282	ribosomal RNA small subunit methyltransferase b (sun) [Source:VB Community Annotation]			GO:0001510,GO:0003723,GO:0005730,GO:0006364,GO:0006396,GO:0008168,GO:0008757,GO:0016740,GO:0032259,GO:0042254	RNA methylation,RNA binding,nucleolus,rRNA processing,RNA processing,methyltransferase activity,S-adenosylmethionine-dependent methyltransferase activity,transferase activity,methylation,ribosome biogenesis
LOC5564833	73.2616	2.39984	0.433928	5.53051	3.19301e-08	5.85568e-07	AAEL000600	Wnt10a protein, putative [Source:VB Community Annotation]			GO:0005102,GO:0005576,GO:0007275,GO:0016055	signaling receptor binding,extracellular region,multicellular organism development,Wnt signaling pathway
LOC5563717	4405.46	0.984893	0.178096	5.53013	3.19985e-08	5.85726e-07	AAEL003903	acid phosphatase-1 [Source:VB Community Annotation]			GO:0003993,GO:0016020,GO:0016021,GO:0016311	acid phosphatase activity,membrane,integral component of membrane,dephosphorylation
LOC5568380	197.784	-1.39018	0.251391	-5.52996	3.20297e-08	5.85726e-07	AAEL019704				GO:0004888,GO:0005515,GO:0007166,GO:0016020,GO:0016021	transmembrane signaling receptor activity,protein binding,cell surface receptor signaling pathway,membrane,integral component of membrane
LOC5570087	52.0402	1.94539	0.351835	5.52925	3.21595e-08	5.87264e-07	AAEL001343
LOC5572859	2079.49	-0.618205	0.111843	-5.52745	3.24914e-08	5.92484e-07	AAEL024003				GO:0000166,GO:0003677,GO:0003682,GO:0005524,GO:0005634,GO:0006260,GO:0016887	nucleotide binding,DNA binding,chromatin binding,ATP binding,nucleus,DNA replication,ATPase activity
LOC5576554	263.445	1.01261	0.183264	5.52539	3.28757e-08	5.98645e-07	AAEL027356				GO:0005515	protein binding
LOC5567869	118.442	-1.92906	0.349216	-5.52397	3.31421e-08	6.02643e-07	AAEL006314	upstream transcription factor [Source:VB Community Annotation]			GO:0006355,GO:0046983	regulation of transcription, DNA-templated,protein dimerization activity
LOC5572599	1417.01	-0.832504	0.150784	-5.52119	3.36719e-08	6.10914e-07	AAEL009912				GO:0003723	RNA binding
LOC5570983	920.681	-0.627253	0.113611	-5.52108	3.36918e-08	6.10914e-07	AAEL008706	smooth muscle caldesmon, putative [Source:VB Community Annotation]			GO:0005634,GO:0005730,GO:0006364,GO:0032040	nucleus,nucleolus,rRNA processing,small-subunit processome
LOC5573204	31.3621	3.31991	0.602083	5.51405	3.5067e-08	6.34955e-07	AAEL001965	imaginal disc growth factor [Source:VB Community Annotation]			GO:0005576,GO:0005975,GO:0008061	extracellular region,carbohydrate metabolic process,chitin binding
LOC5568838	1110.51	-0.840028	0.152614	-5.50426	3.70713e-08	6.70303e-07	AAEL001169	ribosome biogenesis protein BOP1 homolog [Source:VB Community Annotation]			GO:0000463,GO:0000466,GO:0005515,GO:0005634,GO:0005654,GO:0005730,GO:0006364,GO:0030687,GO:0042254,GO:0042273,GO:0043021	maturation of LSU-rRNA from tricistronic rRNA transcript (SSU-rRNA, 5.8S rRNA, LSU-rRNA),maturation of 5.8S rRNA from tricistronic rRNA transcript (SSU-rRNA, 5.8S rRNA, LSU-rRNA),protein binding,nucleus,nucleoplasm,nucleolus,rRNA processing,preribosome, large subunit precursor,ribosome biogenesis,ribosomal large subunit biogenesis,ribonucleoprotein complex binding
LOC110676307	138.021	2.0146	0.366196	5.50142	3.76752e-08	6.80267e-07	AAEL025437				GO:0016491,GO:0055114	oxidoreductase activity,oxidation-reduction process
LOC5570299	104.628	2.70159	0.491547	5.49611	3.8826e-08	7.00065e-07	AAEL008227	short-chain dehydrogenase [Source:VB Community Annotation]			GO:0016020,GO:0016021,GO:0055114	membrane,integral component of membrane,oxidation-reduction process
LOC5568917	491.382	1.33139	0.242448	5.49144	3.98664e-08	7.17819e-07	AAEL020502				GO:0006629,GO:0006631,GO:0006633,GO:0016020,GO:0016021,GO:0016740,GO:0102336,GO:0102337,GO:0102338,GO:0102756	lipid metabolic process,fatty acid metabolic process,fatty acid biosynthetic process,membrane,integral component of membrane,transferase activity,3-oxo-arachidoyl-CoA synthase activity,3-oxo-cerotoyl-CoA synthase activity,3-oxo-lignoceronyl-CoA synthase activity,very-long-chain 3-ketoacyl-CoA synthase activity
LOC5578003	612.184	-0.816571	0.148755	-5.48938	4.03345e-08	7.25232e-07	AAEL003391	tankyrase [Source:VB Community Annotation]			GO:0003950,GO:0005515,GO:0016055,GO:0016740,GO:0016757,GO:0032212,GO:0051225	NAD+ ADP-ribosyltransferase activity,protein binding,Wnt signaling pathway,transferase activity,transferase activity, transferring glycosyl groups,positive regulation of telomere maintenance via telomerase,spindle assembly
LOC5578282	28.3591	4.29373	0.782226	5.48912	4.0395e-08	7.25308e-07	AAEL013603	short-chain dehydrogenase [Source:VB Community Annotation]			GO:0016020,GO:0016021,GO:0055114	membrane,integral component of membrane,oxidation-reduction process
LOC5570740	135.863	1.70413	0.310598	5.48662	4.09704e-08	7.34613e-07	AAEL025518				GO:0005576,GO:0008061	extracellular region,chitin binding
LOC5578082	521.768	0.949671	0.173107	5.48604	4.11041e-08	7.35986e-07	AAEL003423	NADH dehydrogenase, putative [Source:VB Community Annotation]			GO:0003954,GO:0005739,GO:0016020,GO:0016021,GO:0055114	NADH dehydrogenase activity,mitochondrion,membrane,integral component of membrane,oxidation-reduction process
LOC5563989	81.228	-2.22476	0.406488	-5.47312	4.42173e-08	7.90506e-07	AAEL018308				GO:0004888,GO:0005216,GO:0005230,GO:0005886,GO:0006811,GO:0016020,GO:0016021,GO:0022848,GO:0030054,GO:0034220,GO:0045202,GO:0045211,GO:0060078,GO:0060079	transmembrane signaling receptor activity,ion channel activity,extracellular ligand-gated ion channel activity,plasma membrane,ion transport,membrane,integral component of membrane,acetylcholine-gated cation-selective channel activity,cell junction,ion transmembrane transport,synapse,postsynaptic membrane,regulation of postsynaptic membrane potential,excitatory postsynaptic potential
LOC5566470	1248.76	0.632889	0.11564	5.4729	4.42718e-08	7.90506e-07	AAEL005408	annexin x [Source:VB Community Annotation]			GO:0005509,GO:0005544	calcium ion binding,calcium-dependent phospholipid binding
LOC5573047	229.852	2.07663	0.379917	5.46601	4.60288e-08	8.20741e-07	AAEL010219	sugar transporter [Source:VB Community Annotation]			GO:0016020,GO:0016021,GO:0022857,GO:0055085	membrane,integral component of membrane,transmembrane transporter activity,transmembrane transport
LOC5570355	301.63	1.85895	0.340274	5.4631	4.67887e-08	8.33137e-07	AAEL001368	kek1 [Source:VB Community Annotation]			GO:0005515,GO:0016020,GO:0016021	protein binding,membrane,integral component of membrane
LOC5565995	120.751	2.94216	0.538606	5.46254	4.69371e-08	8.34625e-07	AAEL014842	multiple inositol polyphosphate phosphatase [Source:VB Community Annotation]			GO:0004446,GO:0016311,GO:0016791,GO:0034417,GO:0052826	inositol-hexakisphosphate phosphatase activity,dephosphorylation,phosphatase activity,bisphosphoglycerate 3-phosphatase activity,inositol hexakisphosphate 2-phosphatase activity
LOC5575374	1180.07	-1.03504	0.189507	-5.46176	4.71441e-08	8.37149e-07	AAEL011780	DNA mismatch repair protein muts [Source:VB Community Annotation]			GO:0000166,GO:0003677,GO:0005524,GO:0006281,GO:0006298,GO:0006974,GO:0030983	nucleotide binding,DNA binding,ATP binding,DNA repair,mismatch repair,cellular response to DNA damage stimulus,mismatched DNA binding
LOC5573760	119.229	3.8635	0.707842	5.45814	4.81145e-08	8.53204e-07	AAEL025888				GO:0003796	lysozyme activity
LOC5566699	1571.65	-0.699888	0.128312	-5.4546	4.9083e-08	8.69181e-07	AAEL019458				GO:0000166,GO:0005388,GO:0005524,GO:0005886,GO:0006811,GO:0006816,GO:0016020,GO:0016021,GO:0070588	nucleotide binding,calcium transmembrane transporter activity, phosphorylative mechanism,ATP binding,plasma membrane,ion transport,calcium ion transport,membrane,integral component of membrane,calcium ion transmembrane transport
LOC5569338	1698.98	0.702895	0.128953	5.45081	5.01415e-08	8.86706e-07	AAEL007546	actin-related protein 2/3 complex subunit 1A [Source:VB Community Annotation]			GO:0003779,GO:0005515,GO:0005737,GO:0005856,GO:0005885,GO:0015629,GO:0030833,GO:0034314	actin binding,protein binding,cytoplasm,cytoskeleton,Arp2/3 protein complex,actin cytoskeleton,regulation of actin filament polymerization,Arp2/3 complex-mediated actin nucleation
LOC5572632	327.87	0.839941	0.154202	5.44701	5.12225e-08	9.0458e-07	AAEL001846	zinc carboxypeptidase [Source:VB Community Annotation]			GO:0004181,GO:0006508,GO:0008270	metallocarboxypeptidase activity,proteolysis,zinc ion binding
LOC5573842	1582.42	-0.667706	0.122635	-5.44464	5.19089e-08	9.15445e-07	AAEL021227				GO:0003779,GO:0005856,GO:0017124,GO:0042995	actin binding,cytoskeleton,SH3 domain binding,cell projection
LOC5563957	451.919	1.80903	0.332508	5.44056	5.31132e-08	9.35403e-07	AAEL004002	glucose dehydrogenase [Source:VB Community Annotation]			GO:0016614,GO:0050660,GO:0055114	oxidoreductase activity, acting on CH-OH group of donors,flavin adenine dinucleotide binding,oxidation-reduction process
LOC5575628	640.004	-0.768265	0.141243	-5.4393	5.349e-08	9.40752e-07	AAEL011958
LOC5568133	18.2185	4.89297	0.9003	5.43482	5.48507e-08	9.6273e-07	AAEL006576	clip-domain serine protease, putative [Source:VB Community Annotation]			GO:0004252,GO:0006508,GO:0008233,GO:0008236,GO:0016787	serine-type endopeptidase activity,proteolysis,peptidase activity,serine-type peptidase activity,hydrolase activity
LOC5575143	1199.94	0.739512	0.136072	5.4347	5.48892e-08	9.6273e-07	AAEL012974	Glycine cleavage system H protein [Source:UniProtKB/TrEMBL;Acc:Q0IE94]			GO:0005739,GO:0005960,GO:0019464	mitochondrion,glycine cleavage complex,glycine decarboxylation via glycine cleavage system
LOC5580112	67.9381	2.05249	0.377799	5.43274	5.5494e-08	9.72013e-07	AAEL010938	l-asparaginase [Source:VB Community Annotation]			GO:0004067,GO:0006508,GO:0008798,GO:0016787	asparaginase activity,proteolysis,beta-aspartyl-peptidase activity,hydrolase activity
LOC5575506	314.462	0.895625	0.164972	5.42895	5.66858e-08	9.91539e-07	AAEL018228				GO:0016020,GO:0016021,GO:0022857,GO:0055085	membrane,integral component of membrane,transmembrane transporter activity,transmembrane transport
LOC5570506	465.096	1.01339	0.186707	5.42768	5.70901e-08	9.97256e-07	AAEL001407	cdk4/6 [Source:VB Community Annotation]			GO:0000166,GO:0004672,GO:0004674,GO:0005524,GO:0006468	nucleotide binding,protein kinase activity,protein serine/threonine kinase activity,ATP binding,protein phosphorylation
LOC5571611	707.626	1.55608	0.286805	5.42557	5.77713e-08	1.00779e-06	AAEL009195				GO:0016020,GO:0016021,GO:0022857,GO:0055085	membrane,integral component of membrane,transmembrane transporter activity,transmembrane transport
LOC5569378	1277.31	-1.26526	0.233247	-5.42456	5.80963e-08	1.01209e-06	AAEL007563	Dual Oxidase: Peroxidase and NADPH-Oxidase domains. [Source:VB Community Annotation]	DUOX		GO:0004601,GO:0005509,GO:0006979,GO:0016020,GO:0016021,GO:0016174,GO:0016491,GO:0020037,GO:0050665,GO:0055114,GO:0098869	peroxidase activity,calcium ion binding,response to oxidative stress,membrane,integral component of membrane,NAD(P)H oxidase (H(2)O(2)-forming activity,oxidoreductase activity,heme binding,hydrogen peroxide biosynthetic process,oxidation-reduction process,cellular oxidant detoxification
LOC5577900	319.516	1.11221	0.205179	5.42069	5.93686e-08	1.03285e-06	AAEL003356				GO:0003677,GO:0005634	DNA binding,nucleus
LOC5572615	57.5576	3.36197	0.620479	5.41835	6.01524e-08	1.04508e-06	AAEL025694				GO:0000981,GO:0003677,GO:0005634,GO:0006355,GO:0006357,GO:0007275,GO:0043565	DNA-binding transcription factor activity, RNA polymerase II-specific,DNA binding,nucleus,regulation of transcription, DNA-templated,regulation of transcription by RNA polymerase II,multicellular organism development,sequence-specific DNA binding
LOC110675616	265.231	-1.17925	0.217829	-5.41364	6.1757e-08	1.07151e-06	AAEL023898
LOC5573069	1170.02	-1.18088	0.218176	-5.41252	6.21437e-08	1.07677e-06	AAEL010256	E3 ubiquitin ligase [Source:VB Community Annotation]			GO:0004842,GO:0005515,GO:0016567	ubiquitin-protein transferase activity,protein binding,protein ubiquitination
LOC5564804	27.959	4.0591	0.750373	5.40945	6.32197e-08	1.09394e-06	AAEL014627	short-chain dehydrogenase [Source:VB Community Annotation]			GO:0055114	oxidation-reduction process
LOC5572681	2359.65	2.97326	0.549888	5.40703	6.40778e-08	1.10694e-06	AAEL009955				GO:0005319,GO:0006869	lipid transporter activity,lipid transport
LOC5568010	1250.23	-0.573298	0.106032	-5.40685	6.41431e-08	1.10694e-06	AAEL006472	rabconnectin [Source:VB Community Annotation]			GO:0005515	protein binding
LOC5579826	241.596	-1.34554	0.24897	-5.40442	6.50177e-08	1.12053e-06	AAEL005525				GO:0000184,GO:0005515	nuclear-transcribed mRNA catabolic process, nonsense-mediated decay,protein binding
LOC5570311	2906.8	-0.752864	0.139337	-5.4032	6.54611e-08	1.12667e-06	AAEL008242	hook protein [Source:VB Community Annotation]			GO:0030705	cytoskeleton-dependent intracellular transport
LOC5580265	3804.61	-0.671566	0.124303	-5.40264	6.56678e-08	1.12871e-06	AAEL002988				GO:0003723	RNA binding
LOC5576330	1809.85	-0.644207	0.119251	-5.40212	6.58593e-08	1.1305e-06	AAEL019728	suppressor of cytokine signaling [Source:VB Community Annotation]	SOCS		GO:0009968,GO:0035556,GO:0040008	negative regulation of signal transduction,intracellular signal transduction,regulation of growth
LOC5576834	7855.76	-0.885037	0.164044	-5.39511	6.84826e-08	1.17396e-06	AAEL022462				GO:0003677,GO:0003700,GO:0005634,GO:0005667,GO:0006355,GO:0046983	DNA binding,DNA-binding transcription factor activity,nucleus,transcription regulator complex,regulation of transcription, DNA-templated,protein dimerization activity
LOC110677858	51.8534	2.12412	0.39388	5.39282	6.93586e-08	1.1874e-06	AAEL025812
LOC5578157	1047.54	-0.940166	0.174354	-5.39229	6.95644e-08	1.18847e-06	AAEL013539	SH2/SH3 adaptor protein [Source:VB Community Annotation]			GO:0005070,GO:0005515	obsolete SH3/SH2 adaptor activity,protein binding
LOC5574177	111.756	1.86994	0.346787	5.39219	6.96057e-08	1.18847e-06	AAEL019955				GO:0008271,GO:0008272,GO:0015116,GO:0016020,GO:0016021,GO:0055085,GO:1902358	secondary active sulfate transmembrane transporter activity,sulfate transport,sulfate transmembrane transporter activity,membrane,integral component of membrane,transmembrane transport,sulfate transmembrane transport
LOC5570382	966.539	1.17981	0.218899	5.38975	7.05551e-08	1.20308e-06	AAEL008263				GO:0005634,GO:0045893,GO:0046872	nucleus,positive regulation of transcription, DNA-templated,metal ion binding
LOC5564728	1166.21	-0.785584	0.145803	-5.388	7.12466e-08	1.21233e-06	AAEL004410	protein phosphatase [Source:VB Community Annotation]			GO:0004721,GO:0004725,GO:0006470,GO:0007049,GO:0007096,GO:0008138,GO:0016311,GO:0016787,GO:0016791,GO:0035335,GO:0051301	phosphoprotein phosphatase activity,protein tyrosine phosphatase activity,protein dephosphorylation,cell cycle,regulation of exit from mitosis,protein tyrosine/serine/threonine phosphatase activity,dephosphorylation,hydrolase activity,phosphatase activity,peptidyl-tyrosine dephosphorylation,cell division
LOC5576245	441.374	1.98799	0.368974	5.3879	7.12859e-08	1.21233e-06	AAEL002848	tubulin beta chain [Source:VB Community Annotation]			GO:0000166,GO:0003924,GO:0005200,GO:0005525,GO:0005737,GO:0005856,GO:0005874,GO:0007010,GO:0007017	nucleotide binding,GTPase activity,structural constituent of cytoskeleton,GTP binding,cytoplasm,cytoskeleton,microtubule,cytoskeleton organization,microtubule-based process
LOC5574712	190.694	2.47961	0.460265	5.38736	7.15012e-08	1.21439e-06	AAEL011345				GO:0016020,GO:0016021	membrane,integral component of membrane
LOC5565054	344.906	-1.45651	0.270466	-5.38518	7.23709e-08	1.22754e-06	AAEL004562	DNA polymerase eta [Source:VB Community Annotation]			GO:0003684,GO:0005634,GO:0006281	damaged DNA binding,nucleus,DNA repair
LOC5564396	921.245	0.713096	0.13248	5.38266	7.33936e-08	1.24325e-06	AAEL004244				GO:0000166,GO:0003774,GO:0003777,GO:0005524,GO:0007018,GO:0008017	nucleotide binding,motor activity,microtubule motor activity,ATP binding,microtubule-based movement,microtubule binding
LOC5570937	55.5187	2.36938	0.440297	5.38132	7.39401e-08	1.25086e-06	AAEL019772
LOC5574975	767.833	0.704662	0.130956	5.3809	7.41153e-08	1.25218e-06	AAEL002526	MICOS complex subunit MIC10 [Source:UniProtKB/TrEMBL;Acc:Q17I05]			GO:0005739,GO:0005743,GO:0016020,GO:0016021,GO:0061617	mitochondrion,mitochondrial inner membrane,membrane,integral component of membrane,MICOS complex
LOC5577988	1963.1	-0.698092	0.12987	-5.37533	7.64441e-08	1.28983e-06	AAEL018039				GO:0000166,GO:0004672,GO:0004674,GO:0004712,GO:0005524,GO:0006468,GO:0016301,GO:0016310,GO:0016740,GO:0046777	nucleotide binding,protein kinase activity,protein serine/threonine kinase activity,protein serine/threonine/tyrosine kinase activity,ATP binding,protein phosphorylation,kinase activity,phosphorylation,transferase activity,protein autophosphorylation
LOC110676079	38.1448	2.97222	0.553274	5.37205	7.78446e-08	1.31174e-06	AAEL020284
LOC5579242	485.79	-0.952706	0.177469	-5.3683	7.94804e-08	1.33581e-06	AAEL021024				GO:0003677,GO:0003887,GO:0005760,GO:0006260,GO:0016740,GO:0016779,GO:0071897	DNA binding,DNA-directed DNA polymerase activity,gamma DNA polymerase complex,DNA replication,transferase activity,nucleotidyltransferase activity,DNA biosynthetic process
LOC5577906	1010.24	-0.914145	0.170289	-5.36821	7.95227e-08	1.33581e-06	AAEL003332				GO:0005634,GO:0005737	nucleus,cytoplasm
LOC5575534	277.178	2.13382	0.397513	5.36792	7.96506e-08	1.33581e-06	AAEL011910				GO:0005515	protein binding
LOC110675448	20.4686	-4.14563	0.772309	-5.36783	7.96877e-08	1.33581e-06	AAEL025559
LOC5577114	848.913	-0.99002	0.184593	-5.36325	8.17368e-08	1.36837e-06	AAEL021798				GO:0005086,GO:0015031,GO:0032012	ARF guanyl-nucleotide exchange factor activity,protein transport,regulation of ARF protein signal transduction
LOC5578495	217.494	2.30945	0.431244	5.35534	8.53977e-08	1.42781e-06	AAEL002335	atbf1 [Source:VB Community Annotation]			GO:0000981,GO:0003676,GO:0003677,GO:0005634,GO:0006355,GO:0006357,GO:0008270,GO:0043565	DNA-binding transcription factor activity, RNA polymerase II-specific,nucleic acid binding,DNA binding,nucleus,regulation of transcription, DNA-templated,regulation of transcription by RNA polymerase II,zinc ion binding,sequence-specific DNA binding
LOC110678373	65.3726	1.99456	0.372544	5.3539	8.60797e-08	1.43734e-06	AAEL027307				GO:0035368	selenocysteine insertion sequence binding
LOC5576470	499.589	-0.796831	0.1489	-5.35146	8.72482e-08	1.45497e-06	AAEL002918	centaurin beta [Source:VB Community Annotation]			GO:0005096,GO:0005515,GO:0043547,GO:0046872	GTPase activator activity,protein binding,positive regulation of GTPase activity,metal ion binding
LOC5576269	342.152	2.59022	0.484055	5.35108	8.74294e-08	1.4561e-06	AAEL012425	sterol desaturase [Source:VB Community Annotation]			GO:0005506,GO:0008610,GO:0016020,GO:0016021,GO:0016491,GO:0055114	iron ion binding,lipid biosynthetic process,membrane,integral component of membrane,oxidoreductase activity,oxidation-reduction process
LOC5569558	435.948	-0.830889	0.155373	-5.34772	8.9068e-08	1.48148e-06	AAEL007757				GO:0005524,GO:0016020,GO:0016021	ATP binding,membrane,integral component of membrane
LOC110676774	53.8917	1.83164	0.342557	5.34696	8.94417e-08	1.48577e-06	AAEL027182
LOC5580098	949.316	-1.41999	0.265645	-5.34546	9.01898e-08	1.49627e-06	AAEL002142
LOC5565898	51.3148	3.91464	0.732467	5.34446	9.06845e-08	1.50254e-06	AAEL000715	Zinc finger protein [Source:UniProtKB/TrEMBL;Acc:A0A1S4EWM9]			GO:0003676	nucleic acid binding
LOC5571908	2361.54	-0.951977	0.178189	-5.3425	9.16724e-08	1.51695e-06	AAEL020123				GO:0003676,GO:0005634,GO:0046872	nucleic acid binding,nucleus,metal ion binding
LOC5571480	45.8959	3.09629	0.579961	5.33879	9.35665e-08	1.54631e-06	AAEL021099				GO:0005515,GO:0005886,GO:0006811,GO:0016020,GO:0016021,GO:0055085	protein binding,plasma membrane,ion transport,membrane,integral component of membrane,transmembrane transport
LOC5569245	245.238	-1.02257	0.191629	-5.33621	9.4912e-08	1.56653e-06	AAEL023829				GO:0005548,GO:0015914,GO:0046872	phospholipid transporter activity,phospholipid transport,metal ion binding
LOC110674774	50.7999	2.16227	0.405507	5.33228	9.69868e-08	1.59873e-06	AAEL020454
LOC5580194	936.434	1.04823	0.196648	5.33046	9.79633e-08	1.61276e-06	AAEL002539	fimbrin/plastin [Source:VB Community Annotation]			GO:0003779,GO:0005509,GO:0005515,GO:0051015,GO:0051017	actin binding,calcium ion binding,protein binding,actin filament binding,actin filament bundle assembly
LOC5574299	907.526	-0.777981	0.146	-5.32862	9.89594e-08	1.62708e-06	AAEL011067	tubulin-specific chaperone, putative [Source:VB Community Annotation]
LOC5577902	1135.79	-0.745768	0.139984	-5.32753	9.9559e-08	1.63485e-06	AAEL026782				GO:0016020,GO:0016021,GO:0017112,GO:0031410	membrane,integral component of membrane,Rab guanyl-nucleotide exchange factor activity,cytoplasmic vesicle
LOC5572877	1185.01	-0.689423	0.12942	-5.32702	9.98396e-08	1.63728e-06	AAEL010109				GO:0016020,GO:0016021	membrane,integral component of membrane
LOC5577674	566.458	-1.17235	0.220085	-5.32679	9.9961e-08	1.63728e-06	AAEL018259				GO:0003677,GO:0003684,GO:0005634,GO:0006281,GO:0006289,GO:0006974	DNA binding,damaged DNA binding,nucleus,DNA repair,nucleotide-excision repair,cellular response to DNA damage stimulus
LOC5572220	84.9824	2.14859	0.403867	5.32005	1.03736e-07	1.69695e-06	AAEL009627
LOC5578018	2315.26	-0.838507	0.15763	-5.31945	1.04081e-07	1.70043e-06	AAEL003382	Ro ribonucleoprotein autoantigen, putative [Source:VB Community Annotation]			GO:0003723,GO:0005737	RNA binding,cytoplasm
LOC5580274	101.922	-2.43462	0.457905	-5.31686	1.05571e-07	1.72259e-06	AAEL002994				GO:0016020,GO:0016021	membrane,integral component of membrane
LOC110678841	23.2075	-6.88536	1.29524	-5.3159	1.06134e-07	1.72958e-06	AAEL022780
LOC5565544	29752.7	0.687902	0.129463	5.31348	1.0755e-07	1.75044e-06	AAEL004855	ADP,ATP carrier protein [Source:VB Community Annotation]			GO:0005347,GO:0005471,GO:0005743,GO:0015867,GO:0016020,GO:0016021,GO:0022857,GO:0055085,GO:0140021,GO:1990544	ATP transmembrane transporter activity,ATP:ADP antiporter activity,mitochondrial inner membrane,ATP transport,membrane,integral component of membrane,transmembrane transporter activity,transmembrane transport,mitochondrial ADP transmembrane transport,mitochondrial ATP transmembrane transport
LOC5570670	1149.04	0.680985	0.128174	5.31299	1.07843e-07	1.75213e-06	AAEL008490	NADH dehydrogenase, putative [Source:VB Community Annotation]			GO:0003954,GO:0005739,GO:0005743,GO:0005758,GO:0008137,GO:0016020,GO:0055114,GO:0070469	NADH dehydrogenase activity,mitochondrion,mitochondrial inner membrane,mitochondrial intermembrane space,NADH dehydrogenase (ubiquinone) activity,membrane,oxidation-reduction process,respirasome
LOC5568895	62.2005	-1.85395	0.348956	-5.31285	1.07926e-07	1.75213e-06	AAEL007220	Fatty acyl-CoA reductase [Source:UniProtKB/TrEMBL;Acc:A0A1S4FFZ9]			GO:0006629,GO:0016020,GO:0016021,GO:0016491,GO:0055114,GO:0080019,GO:0102965	lipid metabolic process,membrane,integral component of membrane,oxidoreductase activity,oxidation-reduction process,fatty-acyl-CoA reductase (alcohol-forming) activity,alcohol-forming fatty acyl-CoA reductase activity
LOC5572848	726.094	-1.5355	0.289192	-5.30962	1.09855e-07	1.78121e-06	AAEL010068
LOC110678036	33.9035	2.53558	0.477955	5.30506	1.12636e-07	1.82399e-06	AAEL026697
LOC5576548	1359.29	-0.634848	0.119945	-5.29283	1.2044e-07	1.94792e-06	AAEL015016	importin alpha 1a, putative [Source:VB Community Annotation]			GO:0005515,GO:0005634,GO:0005737	protein binding,nucleus,cytoplasm
LOC110673987	34.7112	2.64539	0.50036	5.28696	1.24364e-07	2.00886e-06	AAEL027089	Endoplasmic reticulum resident protein 29 [Source:UniProtKB/TrEMBL;Acc:Q16HE7]
LOC5565490	131.978	-1.28267	0.242748	-5.28395	1.26428e-07	2.03837e-06	AAEL004817
LOC5569534	643.501	0.941685	0.17822	5.28383	1.26508e-07	2.03837e-06	AAEL007725	reticulocalbin [Source:VB Community Annotation]			GO:0005509,GO:0005576,GO:0005783,GO:0005789,GO:0005794,GO:0016020,GO:0016529,GO:0033018,GO:0042470	calcium ion binding,extracellular region,endoplasmic reticulum,endoplasmic reticulum membrane,Golgi apparatus,membrane,sarcoplasmic reticulum,sarcoplasmic reticulum lumen,melanosome
LOC5578380	55.0352	4.29307	0.812597	5.28314	1.26985e-07	2.04137e-06	AAEL013656	bm-40 precursor [Source:VB Community Annotation]			GO:0005509,GO:0005518,GO:0005615,GO:0062023	calcium ion binding,collagen binding,extracellular space,collagen-containing extracellular matrix
LOC5576650	3395.76	0.575095	0.108856	5.28311	1.27011e-07	2.04137e-06	AAEL012684				GO:0005783,GO:0005789,GO:0015031,GO:0016020,GO:0016021	endoplasmic reticulum,endoplasmic reticulum membrane,protein transport,membrane,integral component of membrane
LOC5568078	2115.28	0.6486	0.122971	5.27439	1.33197e-07	2.13716e-06	AAEL006509				GO:0000276,GO:0005739,GO:0006754,GO:0006811,GO:0015078,GO:0015986,GO:0016020,GO:0045263	mitochondrial proton-transporting ATP synthase complex, coupling factor F(o),mitochondrion,ATP biosynthetic process,ion transport,proton transmembrane transporter activity,ATP synthesis coupled proton transport,membrane,proton-transporting ATP synthase complex, coupling factor F(o)
LOC5566034	131.931	-1.32908	0.251995	-5.27425	1.33303e-07	2.13716e-06	AAEL024486				GO:0016020,GO:0016021	membrane,integral component of membrane
LOC5569705	1143.2	-0.76729	0.145515	-5.27294	1.34254e-07	2.14973e-06	AAEL007858	ran GTPase-activating protein [Source:VB Community Annotation]			GO:0005096,GO:0005515,GO:0007165,GO:0043547	GTPase activator activity,protein binding,signal transduction,positive regulation of GTPase activity
LOC5567634	935.833	0.644452	0.122266	5.2709	1.35757e-07	2.1711e-06	AAEL006221	o-sialoglycoprotein endopeptidase [Source:VB Community Annotation]			GO:0000166,GO:0004672,GO:0004674,GO:0005524,GO:0006468,GO:0008033,GO:0016301,GO:0016310,GO:0016740	nucleotide binding,protein kinase activity,protein serine/threonine kinase activity,ATP binding,protein phosphorylation,tRNA processing,kinase activity,phosphorylation,transferase activity
LOC5575696	756.045	0.822475	0.15618	5.26621	1.39267e-07	2.22447e-06	AAEL012010	Conserved insect protein (Fragment) [Source:UniProtKB/TrEMBL;Acc:Q1HQL4]			GO:0016020,GO:0016021	membrane,integral component of membrane
LOC5576136	877.983	-0.937439	0.178021	-5.2659	1.39504e-07	2.22549e-06	AAEL024236				GO:0003677,GO:0003700,GO:0006355	DNA binding,DNA-binding transcription factor activity,regulation of transcription, DNA-templated
LOC5577893	2359.6	0.726436	0.137984	5.26465	1.40454e-07	2.23787e-06	AAEL013407	Catalase [Source:UniProtKB/TrEMBL;Acc:Q16J86]	Cat	CAT1B	GO:0004096,GO:0004601,GO:0006979,GO:0016491,GO:0020037,GO:0042744,GO:0046872,GO:0055114,GO:0098869	catalase activity,peroxidase activity,response to oxidative stress,oxidoreductase activity,heme binding,hydrogen peroxide catabolic process,metal ion binding,oxidation-reduction process,cellular oxidant detoxification
LOC5568538	4761.78	-0.666476	0.126685	-5.26089	1.43364e-07	2.28141e-06	AAEL006956	suppressor of ty [Source:VB Community Annotation]			GO:0003676,GO:0003677,GO:0005634,GO:0006139,GO:0032968	nucleic acid binding,DNA binding,nucleus,nucleobase-containing compound metabolic process,positive regulation of transcription elongation from RNA polymerase II promoter
LOC5579121	194.797	1.18344	0.22508	5.25783	1.45764e-07	2.31674e-06	AAEL003825				GO:0016020,GO:0016021	membrane,integral component of membrane
LOC5572773	59.8246	-1.97434	0.375588	-5.25665	1.46701e-07	2.32877e-06	AAEL010041
LOC5565645	86.3808	2.25856	0.429808	5.25481	1.48179e-07	2.34933e-06	AAEL004897	brain chitinase and chia [Source:VB Community Annotation]			GO:0004553,GO:0005576,GO:0005975,GO:0008061,GO:0008152,GO:0016787,GO:0016798	hydrolase activity, hydrolyzing O-glycosyl compounds,extracellular region,carbohydrate metabolic process,chitin binding,metabolic process,hydrolase activity,hydrolase activity, acting on glycosyl bonds
LOC5571983	824.84	1.14393	0.217929	5.24911	1.52833e-07	2.42014e-06	AAEL025906				GO:0004416,GO:0016787,GO:0019243,GO:0046872	hydroxyacylglutathione hydrolase activity,hydrolase activity,methylglyoxal catabolic process to D-lactate via S-lactoyl-glutathione,metal ion binding
LOC23687565	165.051	2.02473	0.385782	5.24838	1.53442e-07	2.42679e-06	AAEL017145
LOC5576963	1179.75	1.04195	0.198597	5.24654	1.54986e-07	2.4482e-06	AAEL003084	dolichyl-phosphate beta-D-mannosyltransferase, putative [Source:VB Community Annotation]			GO:0004581,GO:0016020,GO:0016021,GO:0016740	dolichyl-phosphate beta-glucosyltransferase activity,membrane,integral component of membrane,transferase activity
LOC5576177	26.706	4.59519	0.876389	5.24332	1.57713e-07	2.48769e-06	AAEL019810				GO:0004672,GO:0005524,GO:0006468	protein kinase activity,ATP binding,protein phosphorylation
LOC23687419	1133.75	-0.579723	0.110568	-5.24313	1.57872e-07	2.48769e-06	AAEL016999	white protein; eye pigment transporter [Source:VB Community Annotation]	white		GO:0000166,GO:0005524,GO:0016020,GO:0016021,GO:0016887,GO:0031409,GO:0042626,GO:0055085	nucleotide binding,ATP binding,membrane,integral component of membrane,ATPase activity,pigment binding,ATPase-coupled transmembrane transporter activity,transmembrane transport
LOC5578739	2936.57	2.76443	0.527492	5.2407	1.59968e-07	2.51764e-06	AAEL003653	Serine Protease Inhibitor (serpin) homologue - unlikely to be inhibitory. [Source:VB Community Annotation]	SRPN12		GO:0004867,GO:0005615,GO:0010466,GO:0010951,GO:0030414	serine-type endopeptidase inhibitor activity,extracellular space,negative regulation of peptidase activity,negative regulation of endopeptidase activity,peptidase inhibitor activity
LOC110677691	288.847	-1.11898	0.213691	-5.23643	1.63714e-07	2.57345e-06	AAEL019908				GO:0003677,GO:0005634,GO:0008270,GO:0046872	DNA binding,nucleus,zinc ion binding,metal ion binding
LOC5576739	209.29	-0.993342	0.189746	-5.23512	1.64877e-07	2.58858e-06	AAEL002967
LOC110676008	45.0598	2.81494	0.538141	5.23086	1.68725e-07	2.64426e-06	AAEL027488
LOC5570027	196.723	-1.31353	0.251118	-5.23074	1.68835e-07	2.64426e-06	AAEL000187	lim-kinase1 [Source:VB Community Annotation]			GO:0004672,GO:0005515,GO:0005524,GO:0006468,GO:0046872	protein kinase activity,protein binding,ATP binding,protein phosphorylation,metal ion binding
LOC5574271	93.9798	2.90587	0.555773	5.22851	1.70883e-07	2.67309e-06	AAEL022261				GO:0042302	structural constituent of cuticle
LOC5566316	1981.54	-0.531097	0.101608	-5.22693	1.7235e-07	2.69275e-06	AAEL005305
LOC110677252	54.5196	1.74031	0.33343	5.21941	1.79494e-07	2.80097e-06	AAEL021895
LOC5564694	1644.21	-0.685235	0.131305	-5.21863	1.8025e-07	2.80936e-06	AAEL026038				GO:0004601,GO:0006979,GO:0020037,GO:0048477,GO:0055114,GO:0098869	peroxidase activity,response to oxidative stress,heme binding,oogenesis,oxidation-reduction process,cellular oxidant detoxification
LOC5572892	46.2044	-2.5388	0.486704	-5.2163	1.82532e-07	2.8415e-06	AAEL024732				GO:0005328,GO:0015293,GO:0016020,GO:0016021,GO:0055085	,symporter activity,membrane,integral component of membrane,transmembrane transport
LOC23687673	1478.4	0.772107	0.148086	5.21391	1.84898e-07	2.87485e-06	AAEL014271				GO:0005509	calcium ion binding
LOC5573776	62.9907	1.96389	0.376784	5.21225	1.86564e-07	2.89726e-06	AAEL000271	gamma-glutamyl hydrolase [Source:VB Community Annotation]			GO:0005576,GO:0005615,GO:0006508,GO:0008242,GO:0016787,GO:0034722	extracellular region,extracellular space,proteolysis,omega peptidase activity,hydrolase activity,gamma-glutamyl-peptidase activity
LOC5579856	57.2372	2.233	0.428462	5.21166	1.87157e-07	2.90296e-06	AAEL005849	synaptic vesicle protein [Source:VB Community Annotation]			GO:0016020,GO:0016021,GO:0022857,GO:0055085	membrane,integral component of membrane,transmembrane transporter activity,transmembrane transport
LOC5571293	6606.61	-0.489631	0.0939891	-5.20944	1.89411e-07	2.93439e-06	AAEL001593	glycerol-3-phosphate dehydrogenase [Source:VB Community Annotation]			GO:0004367,GO:0005975,GO:0006072,GO:0006650,GO:0009331,GO:0016491,GO:0016616,GO:0042803,GO:0046168,GO:0051287,GO:0055114	glycerol-3-phosphate dehydrogenase [NAD+] activity,carbohydrate metabolic process,glycerol-3-phosphate metabolic process,glycerophospholipid metabolic process,glycerol-3-phosphate dehydrogenase complex,oxidoreductase activity,oxidoreductase activity, acting on the CH-OH group of donors, NAD or NADP as acceptor,protein homodimerization activity,glycerol-3-phosphate catabolic process,NAD binding,ox…
LOC5572069	634.403	-0.817851	0.15706	-5.20724	1.91667e-07	2.96577e-06	AAEL027566				GO:0000166,GO:0004672,GO:0004674,GO:0004675,GO:0005524,GO:0006468,GO:0007178,GO:0016020,GO:0016021,GO:0016301,GO:0016310,GO:0016740,GO:0046872	nucleotide binding,protein kinase activity,protein serine/threonine kinase activity,transmembrane receptor protein serine/threonine kinase activity,ATP binding,protein phosphorylation,transmembrane receptor protein serine/threonine kinase signaling pathway,membrane,integral component of membrane,kinase activity,phosphorylation,transferase activity,metal ion binding
LOC110676009	97.4428	-2.36236	0.454268	-5.20037	1.98891e-07	3.07386e-06	AAEL020751
LOC5565718	4926.65	0.747227	0.143694	5.20013	1.99151e-07	3.07419e-06	AAEL014959	heterogeneous nuclear ribonucleoprotein k [Source:VB Community Annotation]			GO:0003676,GO:0003723	nucleic acid binding,RNA binding
LOC5579849	811.696	-1.34499	0.258927	-5.19446	2.0532e-07	3.16561e-06	AAEL005850	Hormone receptor-like in 4 (nuclear receptor) [Source:VB Community Annotation]	HR4		GO:0003677,GO:0003700,GO:0005634,GO:0006355,GO:0008270,GO:0042025,GO:0043565,GO:0046872	DNA binding,DNA-binding transcription factor activity,nucleus,regulation of transcription, DNA-templated,zinc ion binding,host cell nucleus,sequence-specific DNA binding,metal ion binding
LOC5573254	37.3434	2.6338	0.507327	5.19152	2.08586e-07	3.21212e-06	AAEL010337	CRAL/TRIO domain-containing protein [Source:VB Community Annotation]
LOC5568415	108.187	2.76625	0.532935	5.19059	2.0963e-07	3.22435e-06	AAEL006817				GO:0003677,GO:0003700,GO:0006357,GO:0046983	DNA binding,DNA-binding transcription factor activity,regulation of transcription by RNA polymerase II,protein dimerization activity
LOC110679113	35.5516	3.28839	0.633864	5.18784	2.12743e-07	3.26832e-06	AAEL025508
LOC5569213	506.539	1.67519	0.322939	5.18732	2.13342e-07	3.27361e-06	AAEL023657				GO:0004489,GO:0006555,GO:0016491,GO:0035999,GO:0055114	methylenetetrahydrofolate reductase (NAD(P)H) activity,methionine metabolic process,oxidoreductase activity,tetrahydrofolate interconversion,oxidation-reduction process
LOC5579876	152.313	2.25261	0.434274	5.18707	2.13624e-07	3.27405e-06	AAEL005980				GO:0016020,GO:0016021	membrane,integral component of membrane
LOC110675149	40.1466	6.52611	1.25851	5.18557	2.15358e-07	3.29669e-06	AAEL021870
LOC110675332	103.373	1.99693	0.385341	5.18223	2.19247e-07	3.35224e-06	AAEL022559
LOC110678949	6976.25	0.64761	0.124976	5.18186	2.19684e-07	3.35494e-06	AAEL022104	Ribosomal protein L3 [Source:UniProtKB/TrEMBL;Acc:Q1HR77]			GO:0003735,GO:0005840,GO:0006412	structural constituent of ribosome,ribosome,translation
LOC5571926	2076.07	-0.580556	0.11208	-5.17982	2.22105e-07	3.3879e-06	AAEL009392	chromosome region maintenance protein 5/exportin [Source:VB Community Annotation]			GO:0005634,GO:0006886,GO:0008536,GO:0051168	nucleus,intracellular protein transport,Ran GTPase binding,nuclear export
LOC5567538	745.665	0.664037	0.128274	5.17671	2.2583e-07	3.44063e-06	AAEL006144	isopentenyl-diphosphate delta isomerase [Source:VB Community Annotation]	IPPI		GO:0004452,GO:0008299,GO:0016787,GO:0016853,GO:0050992	isopentenyl-diphosphate delta-isomerase activity,isoprenoid biosynthetic process,hydrolase activity,isomerase activity,dimethylallyl diphosphate biosynthetic process
LOC5568339	651.886	-0.846126	0.163553	-5.17342	2.29846e-07	3.49768e-06	AAEL001088	beta-1,3-galactosyltransferase [Source:VB Community Annotation]			GO:0000139,GO:0005794,GO:0006486,GO:0016020,GO:0016021,GO:0016757	Golgi membrane,Golgi apparatus,protein glycosylation,membrane,integral component of membrane,transferase activity, transferring glycosyl groups
LOC23687986	1028.06	-0.668062	0.129279	-5.16758	2.37139e-07	3.60273e-06	AAEL017566				GO:0000166,GO:0003677,GO:0003909,GO:0003910,GO:0005524,GO:0006260,GO:0006281,GO:0006310,GO:0006974,GO:0016874,GO:0051103,GO:0071897	nucleotide binding,DNA binding,DNA ligase activity,DNA ligase (ATP) activity,ATP binding,DNA replication,DNA repair,DNA recombination,cellular response to DNA damage stimulus,ligase activity,DNA ligation involved in DNA repair,DNA biosynthetic process
LOC5570696	519.072	1.77825	0.344125	5.16745	2.37309e-07	3.60273e-06	AAEL008495				GO:0005856	cytoskeleton
LOC5575432	408.43	1.33989	0.259314	5.16707	2.37798e-07	3.6059e-06	AAEL011830	Probable methylthioribulose-1-phosphate dehydratase (MTRu-1-P dehydratase)(EC 4.2.1.109) [Source:VB Community Annotation]			GO:0005737,GO:0008270,GO:0008652,GO:0009086,GO:0016829,GO:0019284,GO:0019509,GO:0046570,GO:0046872	cytoplasm,zinc ion binding,cellular amino acid biosynthetic process,methionine biosynthetic process,lyase activity,L-methionine salvage from S-adenosylmethionine,L-methionine salvage from methylthioadenosine,methylthioribulose 1-phosphate dehydratase activity,metal ion binding
LOC5573269	650.225	0.692935	0.134167	5.16474	2.40777e-07	3.64679e-06	AAEL019544				GO:0003824	catalytic activity
LOC5578083	167.658	2.49115	0.482613	5.16179	2.44593e-07	3.70022e-06	AAEL003413	F-spondin [Source:VB Community Annotation]			GO:0004867,GO:0005576,GO:0007155,GO:0010466,GO:0010951,GO:0030414	serine-type endopeptidase inhibitor activity,extracellular region,cell adhesion,negative regulation of peptidase activity,negative regulation of endopeptidase activity,peptidase inhibitor activity
LOC5570655	100.728	2.19466	0.425281	5.16049	2.46299e-07	3.72166e-06	AAEL008466	homeobox protein b [Source:VB Community Annotation]			GO:0000981,GO:0003677,GO:0005634,GO:0006355,GO:0006357,GO:0007275,GO:0043565	DNA-binding transcription factor activity, RNA polymerase II-specific,DNA binding,nucleus,regulation of transcription, DNA-templated,regulation of transcription by RNA polymerase II,multicellular organism development,sequence-specific DNA binding
LOC5571895	623.366	-0.721557	0.139875	-5.15857	2.48845e-07	3.75373e-06	AAEL009380	phospholipase c beta [Source:VB Community Annotation]			GO:0004435,GO:0005509,GO:0006629,GO:0007165,GO:0008081,GO:0016042,GO:0016787,GO:0035556	phosphatidylinositol phospholipase C activity,calcium ion binding,lipid metabolic process,signal transduction,phosphoric diester hydrolase activity,lipid catabolic process,hydrolase activity,intracellular signal transduction
LOC5567190	607.105	-1.26548	0.245321	-5.15845	2.49005e-07	3.75373e-06	AAEL023706				GO:0005085,GO:0007165,GO:0007264	guanyl-nucleotide exchange factor activity,signal transduction,small GTPase mediated signal transduction
LOC5575268	383.122	-0.832553	0.161575	-5.15274	2.56709e-07	3.86534e-06	AAEL011731	metalloprotease [Source:VB Community Annotation]			GO:0003824,GO:0004222,GO:0006508,GO:0008233,GO:0008237,GO:0016787,GO:0046872	catalytic activity,metalloendopeptidase activity,proteolysis,peptidase activity,metallopeptidase activity,hydrolase activity,metal ion binding
LOC5572607	46.762	2.03138	0.394299	5.15187	2.57904e-07	3.87881e-06	AAEL025433				GO:0016020,GO:0016021	membrane,integral component of membrane
LOC5569184	743.065	-0.756997	0.147025	-5.14876	2.62216e-07	3.93906e-06	AAEL007442	F-box/leucine rich repeat protein [Source:VB Community Annotation]			GO:0005515	protein binding
LOC5579840	4913.85	-0.741354	0.144074	-5.14564	2.66606e-07	3.99742e-06	AAEL005843
LOC5571111	255.366	2.39325	0.46511	5.14556	2.66723e-07	3.99742e-06	AAEL001513	WD-repeat protein [Source:VB Community Annotation]			GO:0005515	protein binding
LOC5576170	9570.85	0.582775	0.113323	5.14259	2.70975e-07	4.05643e-06	AAEL012359	nucleoside-diphosphate kinase NBR-A, putative [Source:VB Community Annotation]			GO:0000166,GO:0004550,GO:0005524,GO:0006165,GO:0006183,GO:0006228,GO:0006241,GO:0016301,GO:0016310,GO:0016740	nucleotide binding,nucleoside diphosphate kinase activity,ATP binding,nucleoside diphosphate phosphorylation,GTP biosynthetic process,UTP biosynthetic process,CTP biosynthetic process,kinase activity,phosphorylation,transferase activity
LOC5577714	58147.7	-0.749933	0.14588	-5.14074	2.73661e-07	4.09188e-06	AAEL013338	lethal(2)essential for life protein, l2efl [Source:VB Community Annotation]			GO:0046872	metal ion binding
LOC5577499	3769.9	0.504859	0.0982453	5.13877	2.76548e-07	4.13025e-06	AAEL003193	inorganic pyrophosphatase [Source:VB Community Annotation]			GO:0000287,GO:0004427,GO:0005737,GO:0006796,GO:0016787,GO:0046872	magnesium ion binding,inorganic diphosphatase activity,cytoplasm,phosphate-containing compound metabolic process,hydrolase activity,metal ion binding
LOC5566377	1927.88	-0.577944	0.112496	-5.13744	2.78504e-07	4.15465e-06	AAEL005358				GO:0003676,GO:0003723	nucleic acid binding,RNA binding
LOC5564708	485.904	-0.755123	0.147017	-5.1363	2.802e-07	4.1751e-06	AAEL023117				GO:0008270	zinc ion binding
LOC5575013	675.79	-0.71861	0.139955	-5.13459	2.82764e-07	4.20777e-06	AAEL019769				GO:0035368	selenocysteine insertion sequence binding
LOC5568193	569.948	0.790942	0.154048	5.1344	2.83046e-07	4.20777e-06	AAEL021979
LOC5578063	33.8448	7.69412	1.49908	5.13254	2.85852e-07	4.24458e-06	AAEL013496	prophenoloxidase [Source:VB Community Annotation]	PPO8		GO:0004497,GO:0016491,GO:0046872,GO:0055114	monooxygenase activity,oxidoreductase activity,metal ion binding,oxidation-reduction process
LOC5571537	36.6395	2.47961	0.483208	5.13155	2.87363e-07	4.26211e-06	AAEL009128	cytochrome P450 [Source:VB Community Annotation]	CYP6M6		GO:0004497,GO:0005506,GO:0016491,GO:0016705,GO:0020037,GO:0046872,GO:0055114	monooxygenase activity,iron ion binding,oxidoreductase activity,oxidoreductase activity, acting on paired donors, with incorporation or reduction of molecular oxygen,heme binding,metal ion binding,oxidation-reduction process
LOC5564581	3781.2	0.587555	0.114587	5.12759	2.93473e-07	4.34773e-06	AAEL004347	Eukaryotic translation initiation factor 3 subunit M (eIF3m) [Source:VB Community Annotation]			GO:0001732,GO:0002183,GO:0003743,GO:0005737,GO:0005852,GO:0006412,GO:0006413,GO:0016282,GO:0033290,GO:0071541	formation of cytoplasmic translation initiation complex,cytoplasmic translational initiation,translation initiation factor activity,cytoplasm,eukaryotic translation initiation factor 3 complex,translation,translational initiation,eukaryotic 43S preinitiation complex,eukaryotic 48S preinitiation complex,eukaryotic translation initiation factor 3 complex, eIF3m
LOC5576270	1719.71	-0.693105	0.135213	-5.12601	2.95949e-07	4.37936e-06	AAEL012421	cadherin [Source:VB Community Annotation]			GO:0005509,GO:0005886,GO:0007155,GO:0007156,GO:0016020,GO:0016021	calcium ion binding,plasma membrane,cell adhesion,homophilic cell adhesion via plasma membrane adhesion molecules,membrane,integral component of membrane
LOC5569186	1650.92	-0.645109	0.125864	-5.12544	2.96849e-07	4.38764e-06	AAEL007447				GO:0003676,GO:0005515,GO:0035278	nucleic acid binding,protein binding,miRNA mediated inhibition of translation
LOC5572370	72.027	-2.76998	0.540608	-5.12383	2.99395e-07	4.4202e-06	AAEL009745	nitric oxide synthase [Source:VB Community Annotation]			GO:0004517,GO:0005516,GO:0006809,GO:0010181,GO:0016491,GO:0020037,GO:0046872,GO:0050660,GO:0050661,GO:0055114	nitric-oxide synthase activity,calmodulin binding,nitric oxide biosynthetic process,FMN binding,oxidoreductase activity,heme binding,metal ion binding,flavin adenine dinucleotide binding,NADP binding,oxidation-reduction process
LOC5566018	35.3595	7.763	1.51589	5.12108	3.03794e-07	4.47922e-06	AAEL023444				GO:0000977,GO:0003676,GO:0003677,GO:0005634,GO:0006357,GO:0046872	RNA polymerase II transcription regulatory region sequence-specific DNA binding,nucleic acid binding,DNA binding,nucleus,regulation of transcription by RNA polymerase II,metal ion binding
LOC5569569	173.672	-1.08088	0.211072	-5.1209	3.04089e-07	4.47922e-06	AAEL007747
LOC5573830	5257.13	0.764924	0.149551	5.11481	3.14061e-07	4.62082e-06	AAEL010754	Mitochondrial ATP synthase F chain [Source:UniProtKB/TrEMBL;Acc:Q1HRJ7]			GO:0005739,GO:0006754,GO:0006811,GO:0016020,GO:0016021,GO:0045263	mitochondrion,ATP biosynthetic process,ion transport,membrane,integral component of membrane,proton-transporting ATP synthase complex, coupling factor F(o)
LOC5574781	892.946	-0.723927	0.141596	-5.11263	3.17704e-07	4.66409e-06	AAEL011413				GO:0005515,GO:0016567,GO:0046872,GO:0061630	protein binding,protein ubiquitination,metal ion binding,ubiquitin protein ligase activity
LOC5574085	941.94	-0.760877	0.148823	-5.11262	3.17726e-07	4.66409e-06	AAEL002260	Putative gryzun [Source:UniProtKB/TrEMBL;Acc:A0A0P6IV21]			GO:0005794,GO:0016020,GO:0016021	Golgi apparatus,membrane,integral component of membrane
LOC5570471	1126.94	-0.618695	0.121063	-5.11053	3.21257e-07	4.71054e-06	AAEL007189	nocturnin [Source:VB Community Annotation]			GO:0004535,GO:0007623,GO:0090503	poly(A)-specific ribonuclease activity,circadian rhythm,RNA phosphodiester bond hydrolysis, exonucleolytic
LOC5565246	1058.79	-0.9907	0.193909	-5.10911	3.23684e-07	4.74074e-06	AAEL014768	glutamate synthase [Source:VB Community Annotation]			GO:0003824,GO:0005506,GO:0006537,GO:0006541,GO:0006807,GO:0008652,GO:0010181,GO:0015930,GO:0016040,GO:0016491,GO:0016638,GO:0016639,GO:0046872,GO:0050660,GO:0051536,GO:0051538,GO:0055114,GO:0097054	catalytic activity,iron ion binding,glutamate biosynthetic process,glutamine metabolic process,nitrogen compound metabolic process,cellular amino acid biosynthetic process,FMN binding,glutamate synthase activity,glutamate synthase (NADH) activity,oxidoreductase activity,oxidoreductase activity, acting on the CH-NH2 group of donors,oxidoreductase activity, acting on the CH-NH2 group of donors, NAD…
LOC5578779	4307.4	1.56791	0.306914	5.10864	3.24487e-07	4.74171e-06	AAEL003706	Histone H2A [Source:UniProtKB/TrEMBL;Acc:Q17ER8]			GO:0000786,GO:0003677,GO:0005634,GO:0005694,GO:0046982	nucleosome,DNA binding,nucleus,chromosome,protein heterodimerization activity
LOC5578782	4307.4	1.56791	0.306914	5.10864	3.24487e-07	4.74171e-06	AAEL003706	Histone H2A [Source:UniProtKB/TrEMBL;Acc:Q17ER8]			GO:0000786,GO:0003677,GO:0005634,GO:0005694,GO:0046982	nucleosome,DNA binding,nucleus,chromosome,protein heterodimerization activity
LOC5574775	1511.16	-0.912041	0.178568	-5.10752	3.26408e-07	4.76438e-06	AAEL019795				GO:0003676,GO:0003723	nucleic acid binding,RNA binding
LOC110678585	31.6527	-2.66782	0.5226	-5.10489	3.30983e-07	4.82046e-06	AAEL023495				GO:0003677,GO:0006355,GO:0043565	DNA binding,regulation of transcription, DNA-templated,sequence-specific DNA binding
LOC5579217	35.39	2.51377	0.492437	5.10476	3.3122e-07	4.82046e-06	AAEL026991	Endoplasmic reticulum resident protein 29 [Source:UniProtKB/TrEMBL;Acc:Q16HE7]			GO:0005783,GO:0005788,GO:0009306,GO:0042470	endoplasmic reticulum,endoplasmic reticulum lumen,protein secretion,melanosome
LOC5571996	63.2555	4.80926	0.942131	5.10467	3.31374e-07	4.82046e-06	AAEL009484
LOC5578715	674.039	-0.73328	0.143668	-5.104	3.32545e-07	4.83204e-06	AAEL013825	helicase [Source:VB Community Annotation]			GO:0000166,GO:0003676,GO:0003723,GO:0003724,GO:0004386,GO:0005524,GO:0006401,GO:0016787	nucleotide binding,nucleic acid binding,RNA binding,RNA helicase activity,helicase activity,ATP binding,RNA catabolic process,hydrolase activity
LOC5575196	1153.02	-0.958364	0.188105	-5.09482	3.49067e-07	5.0664e-06	AAEL019921				GO:0000166,GO:0005524,GO:0005737,GO:0005813,GO:0005815,GO:0005819,GO:0005856,GO:0005874,GO:0008017,GO:0008568,GO:0016020,GO:0016021,GO:0016853,GO:0016887,GO:0031117,GO:0034214,GO:0051013	nucleotide binding,ATP binding,cytoplasm,centrosome,microtubule organizing center,spindle,cytoskeleton,microtubule,microtubule binding,microtubule-severing ATPase activity,membrane,integral component of membrane,isomerase activity,ATPase activity,positive regulation of microtubule depolymerization,protein hexamerization,microtubule severing
LOC5579351	2116.5	-0.525836	0.103227	-5.094	3.50595e-07	5.08284e-06	AAEL015543				GO:0003676	nucleic acid binding
LOC5572399	25.2341	2.91942	0.573181	5.09336	3.51781e-07	5.09429e-06	AAEL009980
LOC5569112	381.273	-2.36685	0.464982	-5.0902	3.57688e-07	5.17401e-06	AAEL007369	homeobox protein even skipped [Source:VB Community Annotation]			GO:0000981,GO:0003677,GO:0005634,GO:0006355,GO:0006357,GO:0043565	DNA-binding transcription factor activity, RNA polymerase II-specific,DNA binding,nucleus,regulation of transcription, DNA-templated,regulation of transcription by RNA polymerase II,sequence-specific DNA binding
LOC5564418	468.712	1.95461	0.384158	5.08802	3.61813e-07	5.22781e-06	AAEL014428	ABC transporter [Source:VB Community Annotation]			GO:0000166,GO:0005524,GO:0016020,GO:0016021,GO:0016887,GO:0043190,GO:0055085	nucleotide binding,ATP binding,membrane,integral component of membrane,ATPase activity,ATP-binding cassette (ABC) transporter complex,transmembrane transport
LOC5565706	121.252	-2.79739	0.549832	-5.08771	3.62412e-07	5.2306e-06	AAEL021878	Zinc finger protein [Source:UniProtKB/TrEMBL;Acc:A0A1S4FUN1]			GO:0003676,GO:0003677	nucleic acid binding,DNA binding
LOC110676821	62.1339	1.56211	0.307281	5.08367	3.70215e-07	5.33723e-06	AAEL020968
LOC5565532	1797.24	-0.571242	0.112385	-5.08291	3.71687e-07	5.35245e-06	AAEL027319				GO:0005515	protein binding
LOC110674098	496.221	7.93814	1.56214	5.08157	3.74321e-07	5.38436e-06	AAEL023292
LOC5570375	45.2402	2.10149	0.413622	5.0807	3.7604e-07	5.40305e-06	AAEL021941
LOC5577718	184.013	-1.25845	0.247887	-5.07671	3.84026e-07	5.51166e-06	AAEL019528				GO:0004114,GO:0006198,GO:0006355,GO:0007165,GO:0008081,GO:0016787,GO:0046872	3',5'-cyclic-nucleotide phosphodiesterase activity,cAMP catabolic process,regulation of transcription, DNA-templated,signal transduction,phosphoric diester hydrolase activity,hydrolase activity,metal ion binding
LOC5576202	467.119	-0.855427	0.16855	-5.0752	3.87079e-07	5.54928e-06	AAEL012393				GO:0016020,GO:0016021	membrane,integral component of membrane
LOC5564053	1013.29	0.620764	0.122346	5.07383	3.89883e-07	5.58327e-06	AAEL004060				GO:0000275,GO:0015986,GO:0046933	mitochondrial proton-transporting ATP synthase complex, catalytic sector F(1),ATP synthesis coupled proton transport,proton-transporting ATP synthase activity, rotational mechanism
LOC5565042	485.196	-1.05094	0.20718	-5.07258	3.92449e-07	5.61377e-06	AAEL022687				GO:0016020,GO:0016021,GO:0016740	membrane,integral component of membrane,transferase activity
LOC5570561	368.753	-0.878871	0.173492	-5.06579	4.06717e-07	5.8114e-06	AAEL008390	guanylate cyclase [Source:VB Community Annotation]			GO:0004383,GO:0004672,GO:0005524,GO:0006182,GO:0006468,GO:0009190,GO:0016020,GO:0016021,GO:0016829,GO:0016849,GO:0035556	guanylate cyclase activity,protein kinase activity,ATP binding,cGMP biosynthetic process,protein phosphorylation,cyclic nucleotide biosynthetic process,membrane,integral component of membrane,lyase activity,phosphorus-oxygen lyase activity,intracellular signal transduction
LOC5574849	12.8013	7.26481	1.43416	5.06553	4.07255e-07	5.81264e-06	AAEL011454
LOC5579021	907.937	0.599532	0.118383	5.06434	4.09828e-07	5.84288e-06	AAEL013960				GO:0005739,GO:0005743,GO:0005747,GO:0016020,GO:0055114,GO:0070469	mitochondrion,mitochondrial inner membrane,mitochondrial respiratory chain complex I,membrane,oxidation-reduction process,respirasome
LOC5570926	1085.72	-0.657842	0.130025	-5.05934	4.20703e-07	5.9913e-06	AAEL019916
LOC5573396	557.852	-0.731777	0.144707	-5.05696	4.2599e-07	6.05988e-06	AAEL002051	sodium/hydrogen exchanger 7, 9 (nhe7, nhe9) [Source:VB Community Annotation]			GO:0005768,GO:0006811,GO:0006812,GO:0006814,GO:0006885,GO:0010008,GO:0015297,GO:0015299,GO:0015385,GO:0016020,GO:0016021,GO:0035725,GO:0055085,GO:1902600	endosome,ion transport,cation transport,sodium ion transport,regulation of pH,endosome membrane,antiporter activity,solute:proton antiporter activity,sodium:proton antiporter activity,membrane,integral component of membrane,sodium ion transmembrane transport,transmembrane transport,proton transmembrane transport
LOC5574076	660.126	-0.899934	0.177993	-5.056	4.28143e-07	6.08379e-06	AAEL018205				GO:0004725,GO:0005515,GO:0006470,GO:0035335	protein tyrosine phosphatase activity,protein binding,protein dephosphorylation,peptidyl-tyrosine dephosphorylation
LOC110678331	16.7006	3.93688	0.779289	5.05189	4.37467e-07	6.20942e-06	AAEL023843
LOC5567118	56.9979	1.95432	0.38742	5.04445	4.54821e-07	6.44864e-06	AAEL015304				GO:0005634	nucleus
LOC5574619	630.459	-0.755741	0.150131	-5.03388	4.80643e-07	6.80726e-06	AAEL008693	Cation efflux protein/ zinc transporter [Source:UniProtKB/TrEMBL;Acc:A0A1S4FKH5]			GO:0006812,GO:0006829,GO:0008324,GO:0016020,GO:0016021,GO:0055085,GO:0098655	cation transport,zinc ion transport,cation transmembrane transporter activity,membrane,integral component of membrane,transmembrane transport,cation transmembrane transport
LOC5575681	840.331	0.683082	0.135779	5.03084	4.88324e-07	6.90242e-06	AAEL011992	NADH:ubiquinone dehydrogenase, putative [Source:VB Community Annotation]			GO:0005739,GO:0005743,GO:0016020,GO:0055114,GO:0070469	mitochondrion,mitochondrial inner membrane,membrane,oxidation-reduction process,respirasome
LOC5568281	334.502	-1.02336	0.20342	-5.0308	4.88435e-07	6.90242e-06	AAEL006707				GO:0004222,GO:0006508,GO:0007155,GO:0008233,GO:0008237,GO:0016020,GO:0016787,GO:0046872	metalloendopeptidase activity,proteolysis,cell adhesion,peptidase activity,metallopeptidase activity,membrane,hydrolase activity,metal ion binding
LOC5577897	58.16	2.44368	0.485907	5.02911	4.92765e-07	6.95599e-06	AAEL003345	argininosuccinate lyase [Source:VB Community Annotation]			GO:0003824,GO:0004056,GO:0042450	catalytic activity,argininosuccinate lyase activity,arginine biosynthetic process via ornithine
LOC110678272	74.7494	-4.0408	0.803556	-5.02865	4.93956e-07	6.96515e-06	AAEL021263
LOC23687788	3887.96	-0.544595	0.108314	-5.02793	4.95808e-07	6.98362e-06	AAEL017368				GO:0000166,GO:0003924,GO:0005525,GO:0005737	nucleotide binding,GTPase activity,GTP binding,cytoplasm
LOC5577980	1327.94	-0.751358	0.149658	-5.02049	5.15397e-07	7.25161e-06	AAEL013460	ecotropic viral integration site [Source:VB Community Annotation]			GO:0005096,GO:0043087,GO:0043547	GTPase activator activity,regulation of GTPase activity,positive regulation of GTPase activity
LOC5571450	1125.95	0.784576	0.156324	5.01892	5.19637e-07	7.30328e-06	AAEL009078	NADH-ubiquinone oxidoreductase sgdh subunit [Source:VB Community Annotation]			GO:0005739,GO:0016020,GO:0016021	mitochondrion,membrane,integral component of membrane
LOC5569057	1347.06	-0.574345	0.114534	-5.0146	5.31433e-07	7.46092e-06	AAEL023169				GO:0005515,GO:0016020	protein binding,membrane
LOC5564045	192.602	-1.0912	0.217621	-5.01423	5.3245e-07	7.46706e-06	AAEL004076	Ubiquitin-like modifier-activating enzyme 5 (Ubiquitin-activating enzyme 5) [Source:VB Community Annotation]			GO:0000166,GO:0005524,GO:0008641,GO:0046872	nucleotide binding,ATP binding,ubiquitin-like modifier activating enzyme activity,metal ion binding
LOC5578332	377.119	0.827076	0.165113	5.00915	5.46699e-07	7.65311e-06	AAEL022456
LOC5576541	2088.32	-0.653968	0.130556	-5.00908	5.46905e-07	7.65311e-06	AAEL025130				GO:0005085,GO:0005089,GO:0005515	guanyl-nucleotide exchange factor activity,Rho guanyl-nucleotide exchange factor activity,protein binding
LOC5573437	78.9359	3.33637	0.666845	5.00322	5.63818e-07	7.8812e-06	AAEL010479	sugar transporter [Source:VB Community Annotation]			GO:0016020,GO:0016021,GO:0022857,GO:0055085	membrane,integral component of membrane,transmembrane transporter activity,transmembrane transport
LOC5577047	326.508	-1.44193	0.288227	-5.00275	5.65183e-07	7.89172e-06	AAEL021162
LOC5566390	1219.12	-0.543561	0.108658	-5.00249	5.65946e-07	7.89382e-06	AAEL019882				GO:0003779,GO:0005737,GO:0005856,GO:0005886,GO:0008270,GO:0016020,GO:0042383,GO:0046872	actin binding,cytoplasm,cytoskeleton,plasma membrane,zinc ion binding,membrane,sarcolemma,metal ion binding
LOC5566137	392.038	0.830525	0.166053	5.00155	5.68706e-07	7.92373e-06	AAEL005190	mitochondrial ribosomal protein, L42, putative [Source:VB Community Annotation]	mRpL42		GO:0005739	mitochondrion
LOC110678502	32.035	2.58695	0.517364	5.00025	5.72571e-07	7.96359e-06	AAEL026570
LOC5568593	150.695	2.14839	0.429663	5.00017	5.72804e-07	7.96359e-06	AAEL001104				GO:0003779,GO:0005515	actin binding,protein binding
LOC5572360	28.4918	7.44713	1.48959	4.99946	5.74908e-07	7.98421e-06	AAEL009752				GO:0042302	structural constituent of cuticle
LOC110674162	80.9215	1.6349	0.327067	4.99865	5.77324e-07	8.00912e-06	AAEL023183
LOC110675119	1706.16	-1.35983	0.272333	-4.99325	5.93731e-07	8.22787e-06	AAEL026039
LOC5579235	3506.49	-0.560347	0.112235	-4.99264	5.95606e-07	8.24498e-06	AAEL014622
LOC5575805	627.741	-0.828066	0.165883	-4.99188	5.97959e-07	8.26866e-06	AAEL012084				GO:0005515	protein binding
LOC5578982	5163.23	-0.781172	0.156509	-4.99124	5.99937e-07	8.28711e-06	AAEL019560				GO:0005634,GO:0008270,GO:0046872	nucleus,zinc ion binding,metal ion binding
LOC5579971	322.873	-1.06373	0.213134	-4.99087	6.01071e-07	8.28881e-06	AAEL026089
LOC5576214	11699.4	0.794022	0.159098	4.99078	6.01347e-07	8.28881e-06	AAEL002827	ATP synthase beta subunit [Source:VB Community Annotation]			GO:0000166,GO:0005524,GO:0006754,GO:0006811,GO:0015986,GO:0016020,GO:0045261,GO:0046034,GO:0046933,GO:0046961,GO:1902600	nucleotide binding,ATP binding,ATP biosynthetic process,ion transport,ATP synthesis coupled proton transport,membrane,proton-transporting ATP synthase complex, catalytic core F(1),ATP metabolic process,proton-transporting ATP synthase activity, rotational mechanism,proton-transporting ATPase activity, rotational mechanism,proton transmembrane transport
LOC5568936	283.896	-0.951936	0.190776	-4.98982	6.04354e-07	8.32134e-06	AAEL007237				GO:0004518,GO:0006281,GO:0090305	nuclease activity,DNA repair,nucleic acid phosphodiester bond hydrolysis
LOC5572510	1427.33	-0.724717	0.145286	-4.9882	6.0944e-07	8.38126e-06	AAEL009851	DNA polymerase zeta catalytic subunit [Source:VB Community Annotation]			GO:0000166,GO:0003676,GO:0003677,GO:0003887,GO:0006281,GO:0016035,GO:0016740,GO:0016779,GO:0019985,GO:0046872,GO:0051536	nucleotide binding,nucleic acid binding,DNA binding,DNA-directed DNA polymerase activity,DNA repair,zeta DNA polymerase complex,transferase activity,nucleotidyltransferase activity,translesion synthesis,metal ion binding,iron-sulfur cluster binding
LOC5568070	1428.69	0.823953	0.165186	4.98802	6.10008e-07	8.38126e-06	AAEL006525	kelch repeat protein [Source:VB Community Annotation]			GO:0005515	protein binding
LOC5567419	1414.2	0.527034	0.105706	4.98583	6.16959e-07	8.46774e-06	AAEL006066	peptidyl-tRNA hydrolase [Source:VB Community Annotation]			GO:0004045,GO:0016020,GO:0016021,GO:0016787	aminoacyl-tRNA hydrolase activity,membrane,integral component of membrane,hydrolase activity
LOC110677184	118.814	-1.46559	0.294299	-4.97992	6.36092e-07	8.72103e-06	AAEL021379
LOC110678350	41.0307	3.27896	0.658532	4.9792	6.3849e-07	8.7446e-06	AAEL022711
LOC5580172	28.9023	-3.50656	0.704673	-4.97615	6.48621e-07	8.8739e-06	AAEL020313
LOC5565483	787.59	-0.627968	0.126208	-4.97568	6.50189e-07	8.88592e-06	AAEL004821	potassium-dependent sodium-calcium exchanger, putative [Source:VB Community Annotation]			GO:0006816,GO:0015297,GO:0016020,GO:0016021,GO:0055085	calcium ion transport,antiporter activity,membrane,integral component of membrane,transmembrane transport
LOC5571730	1161.29	-0.855182	0.17218	-4.96679	6.80714e-07	9.29323e-06	AAEL009262
LOC5575286	1301.27	-0.56328	0.113433	-4.96576	6.84315e-07	9.33249e-06	AAEL023265				GO:0006355	regulation of transcription, DNA-templated
LOC5571700	1503.15	-0.716049	0.144225	-4.96482	6.87655e-07	9.36812e-06	AAEL009227	kinesin heavy chain [Source:VB Community Annotation]			GO:0000166,GO:0003774,GO:0003777,GO:0005524,GO:0007018,GO:0008017	nucleotide binding,motor activity,microtubule motor activity,ATP binding,microtubule-based movement,microtubule binding
LOC5578994	1420.76	-0.751833	0.151481	-4.96322	6.93336e-07	9.43553e-06	AAEL003801	28S ribosomal protein S5 [Source:VB Community Annotation]	mRpS5		GO:0003723,GO:0003735,GO:0005840,GO:0006412,GO:1990904	RNA binding,structural constituent of ribosome,ribosome,translation,ribonucleoprotein complex
LOC5578267	735.041	0.587684	0.118454	4.9613	7.00212e-07	9.51903e-06	AAEL003492	ribonuclease, putative [Source:VB Community Annotation]			GO:0004521,GO:0016020,GO:0016021,GO:0090305,GO:0090502	endoribonuclease activity,membrane,integral component of membrane,nucleic acid phosphodiester bond hydrolysis,RNA phosphodiester bond hydrolysis, endonucleolytic
LOC5567501	2397.65	0.609016	0.122785	4.96003	7.04809e-07	9.56494e-06	AAEL006115	Eukaryotic translation initiation factor 3 subunit K (eIF3k)(eIF-3 p25) [Source:VB Community Annotation]			GO:0001732,GO:0002183,GO:0003723,GO:0003743,GO:0005737,GO:0005852,GO:0006412,GO:0006413,GO:0006446,GO:0016282,GO:0033290,GO:0043022	formation of cytoplasmic translation initiation complex,cytoplasmic translational initiation,RNA binding,translation initiation factor activity,cytoplasm,eukaryotic translation initiation factor 3 complex,translation,translational initiation,regulation of translational initiation,eukaryotic 43S preinitiation complex,eukaryotic 48S preinitiation complex,ribosome binding
LOC5576659	49.2438	2.65813	0.535918	4.95996	7.05074e-07	9.56494e-06	AAEL012689	Glucose-methanol-choline (gmc) oxidoreductase [Source:UniProtKB/TrEMBL;Acc:A0A1S4FWX8]			GO:0016020,GO:0016021,GO:0016614,GO:0050660,GO:0055114	membrane,integral component of membrane,oxidoreductase activity, acting on CH-OH group of donors,flavin adenine dinucleotide binding,oxidation-reduction process
LOC5579180	1861.87	-0.585141	0.118058	-4.9564	7.18112e-07	9.73155e-06	AAEL003896	serine/threonine protein kinase [Source:VB Community Annotation]			GO:0000166,GO:0004672,GO:0005524,GO:0006468	nucleotide binding,protein kinase activity,ATP binding,protein phosphorylation
LOC5570996	1142.2	0.743801	0.150426	4.94464	7.62864e-07	1.03243e-05	AAEL008723				GO:0016020,GO:0016021	membrane,integral component of membrane
LOC5568217	168.82	-1.04862	0.212079	-4.94448	7.63458e-07	1.03243e-05	AAEL025845				GO:0004672,GO:0005524,GO:0006468	protein kinase activity,ATP binding,protein phosphorylation
LOC110675802	44.1254	2.53578	0.512909	4.94391	7.65706e-07	1.03439e-05	AAEL023633
LOC5570322	3825.05	-0.522541	0.105737	-4.94188	7.73729e-07	1.04413e-05	AAEL001372	sentrin/sumo-specific protease senp7 [Source:VB Community Annotation]			GO:0006508,GO:0008234	proteolysis,cysteine-type peptidase activity
LOC5573438	35.4378	2.23974	0.453248	4.94152	7.75145e-07	1.04494e-05	AAEL010480	serine-pyruvate aminotransferase [Source:VB Community Annotation]			GO:0003824,GO:0004760,GO:0008453,GO:0008483,GO:0016740	catalytic activity,serine-pyruvate transaminase activity,alanine-glyoxylate transaminase activity,transaminase activity,transferase activity
LOC5568990	216.722	-1.10898	0.224608	-4.93739	7.91738e-07	1.0662e-05	AAEL007295				GO:0005515	protein binding
LOC5575437	861.026	-0.579746	0.117441	-4.9365	7.95362e-07	1.06996e-05	AAEL002651
LOC110680342	90.081	-1.26604	0.256648	-4.93297	8.09892e-07	1.08837e-05	AAEL027290				GO:0006811,GO:0015078,GO:0033180,GO:1902600	ion transport,proton transmembrane transporter activity,proton-transporting V-type ATPase, V1 domain,proton transmembrane transport
LOC5567691	66.2179	2.62948	0.533088	4.93255	8.11633e-07	1.08957e-05	AAEL006283	GPCR Myosuppressin Family [Source:VB Community Annotation]	GPRDMS		GO:0004930,GO:0007186,GO:0008528,GO:0016020,GO:0016021	G protein-coupled receptor activity,G protein-coupled receptor signaling pathway,G protein-coupled peptide receptor activity,membrane,integral component of membrane
LOC110676775	48.4146	1.77598	0.360174	4.93088	8.18611e-07	1.09779e-05	AAEL023579
LOC5571925	129.983	-1.6311	0.331102	-4.92629	8.38075e-07	1.12272e-05	AAEL009401	U6 small nuclear RNA (adenine-(43)-N(6))-methyltransferase [Source:UniProtKB/TrEMBL;Acc:A0A1S4FM63]			GO:0008168,GO:0016740,GO:0032259	methyltransferase activity,transferase activity,methylation
LOC5579195	15.2737	7.51374	1.52623	4.92307	8.51977e-07	1.14016e-05	AAEL020488				GO:0003676,GO:0003723	nucleic acid binding,RNA binding
LOC5575446	1356.99	-0.676615	0.137469	-4.92194	8.56923e-07	1.14559e-05	AAEL002646	cytohesin 1, 2, 3, 4 (guanine nucleotide-exchange protein) [Source:VB Community Annotation]			GO:0005086,GO:0005543,GO:0005886,GO:0032012	ARF guanyl-nucleotide exchange factor activity,phospholipid binding,plasma membrane,regulation of ARF protein signal transduction
LOC110680459	148.278	-1.1879	0.241732	-4.91415	8.91707e-07	1.18879e-05	AAEL025421
LOC5570083	63.6853	1.81496	0.369337	4.91411	8.91878e-07	1.18879e-05	AAEL001325				GO:0016020,GO:0016021	membrane,integral component of membrane
LOC5564120	384.21	-0.783359	0.159411	-4.91408	8.92011e-07	1.18879e-05	AAEL019570				GO:0003676	nucleic acid binding
LOC110674213	28.8822	5.90826	1.20273	4.91239	8.99747e-07	1.19786e-05	AAEL021783
LOC5569033	31.3865	-3.23583	0.658737	-4.91217	9.00762e-07	1.19798e-05	AAEL019963				GO:0004252,GO:0006508	serine-type endopeptidase activity,proteolysis
LOC5576985	230.435	2.40431	0.48965	4.91027	9.09528e-07	1.20839e-05	AAEL003052				GO:0006629,GO:0016020,GO:0016021,GO:0016627,GO:0055114	lipid metabolic process,membrane,integral component of membrane,oxidoreductase activity, acting on the CH-CH group of donors,oxidation-reduction process
LOC5564506	218.432	2.25125	0.458539	4.90962	9.12536e-07	1.21113e-05	AAEL004283				GO:0003676	nucleic acid binding
LOC5567101	772.864	-0.718023	0.146293	-4.90811	9.19578e-07	1.21922e-05	AAEL005837	neutral sphingomyelinase (n-smase) activation associated factor fan [Source:VB Community Annotation]			GO:0005515	protein binding
LOC5579867	4578.99	-0.523024	0.106569	-4.90783	9.20878e-07	1.21969e-05	AAEL026846				GO:0003743,GO:0005634,GO:0005669,GO:0006351,GO:0006352,GO:0006355,GO:0006413,GO:0046982	translation initiation factor activity,nucleus,transcription factor TFIID complex,transcription, DNA-templated,DNA-templated transcription, initiation,regulation of transcription, DNA-templated,translational initiation,protein heterodimerization activity
LOC5573668	45.0768	2.54401	0.518392	4.9075	9.22428e-07	1.22049e-05	AAEL010676	regulator of g protein signaling [Source:VB Community Annotation]			GO:0007186,GO:0008277,GO:0009968,GO:0035556	G protein-coupled receptor signaling pathway,regulation of G protein-coupled receptor signaling pathway,negative regulation of signal transduction,intracellular signal transduction
LOC5570127	3557.45	-0.638671	0.130174	-4.90628	9.28219e-07	1.22689e-05	AAEL008107	F14p3.9 protein (auxin transport protein) [Source:UniProtKB/TrEMBL;Acc:A0A1S4FIN3]			GO:0005515,GO:0008270,GO:0046872	protein binding,zinc ion binding,metal ion binding
LOC5564892	46.4861	2.27849	0.464516	4.90509	9.33843e-07	1.23218e-05	AAEL004451	organic cation transporter [Source:VB Community Annotation]			GO:0016020,GO:0016021,GO:0022857,GO:0055085	membrane,integral component of membrane,transmembrane transporter activity,transmembrane transport
LOC5574767	1171.98	-0.568413	0.115884	-4.90503	9.34137e-07	1.23218e-05	AAEL011415	lysine-specific histone demethylase [Source:VB Community Annotation]			GO:0003677,GO:0005515,GO:0005634,GO:0006325,GO:0006355,GO:0016491,GO:0034720,GO:0050660,GO:0055114	DNA binding,protein binding,nucleus,chromatin organization,regulation of transcription, DNA-templated,oxidoreductase activity,histone H3-K4 demethylation,flavin adenine dinucleotide binding,oxidation-reduction process
LOC5569585	84.2985	2.10595	0.429685	4.90114	9.52809e-07	1.25552e-05	AAEL001281				GO:0005452,GO:0006811,GO:0006820,GO:0008509,GO:0015698,GO:0016020,GO:0016021,GO:0098656	inorganic anion exchanger activity,ion transport,anion transport,anion transmembrane transporter activity,inorganic anion transport,membrane,integral component of membrane,anion transmembrane transport
LOC5564711	128.164	3.17612	0.648241	4.8996	9.60311e-07	1.26411e-05	AAEL014579	trypsin, putative [Source:VB Community Annotation]			GO:0004252,GO:0006508,GO:0016020,GO:0016021	serine-type endopeptidase activity,proteolysis,membrane,integral component of membrane
LOC5572431	493.6	-0.733205	0.149667	-4.89892	9.63659e-07	1.26723e-05	AAEL001819				GO:0016020,GO:0016021	membrane,integral component of membrane
LOC5573289	94.0875	-1.2559	0.256394	-4.89834	9.66503e-07	1.26967e-05	AAEL010376				GO:0000493	box H/ACA snoRNP assembly
LOC110678724	19.6725	3.58732	0.732544	4.89708	9.72733e-07	1.27655e-05	AAEL027291
LOC5580180	17.6072	-4.96064	1.01315	-4.89627	9.76738e-07	1.2805e-05	AAEL002549	protein sosie [Source:VB Community Annotation]	sosie
LOC110678808	28.947	2.5193	0.514854	4.89323	9.91957e-07	1.29913e-05	AAEL027802
LOC5568317	297.133	-1.294	0.264498	-4.89227	9.96797e-07	1.30414e-05	AAEL006736				GO:0005515,GO:0016020,GO:0016021	protein binding,membrane,integral component of membrane
LOC5575910	896.868	-0.685298	0.140116	-4.89093	1.0036e-06	1.31172e-05	AAEL012154	2,3-cyclic-nucleotide 2-phosphodiesterase [Source:VB Community Annotation]			GO:0000166,GO:0009166,GO:0016787	nucleotide binding,nucleotide catabolic process,hydrolase activity
LOC23687474	2746.56	-0.643466	0.131613	-4.88908	1.0131e-06	1.32278e-05	AAEL017054				GO:0006281,GO:0016035,GO:0019985	DNA repair,zeta DNA polymerase complex,translesion synthesis
LOC5572457	175.531	2.07747	0.424985	4.88834	1.01691e-06	1.32642e-05	AAEL001796	Nuclear hormone receptor (HR78) [Source:VB Community Annotation]			GO:0003677,GO:0003700,GO:0003707,GO:0005634,GO:0006355,GO:0008270,GO:0042025,GO:0043565,GO:0046872	DNA binding,DNA-binding transcription factor activity,steroid hormone receptor activity,nucleus,regulation of transcription, DNA-templated,zinc ion binding,host cell nucleus,sequence-specific DNA binding,metal ion binding
LOC5565778	214.398	1.88573	0.385946	4.88599	1.02913e-06	1.34099e-05	AAEL004972
LOC5574192	823.273	-0.618083	0.126645	-4.88044	1.0585e-06	1.37786e-05	AAEL002306	Hect E3 ubiquitin ligase [Source:UniProtKB/TrEMBL;Acc:A0A1S4F1D4]			GO:0004842,GO:0005515,GO:0016567,GO:0046872	ubiquitin-protein transferase activity,protein binding,protein ubiquitination,metal ion binding
LOC110677277	41.493	2.4998	0.512347	4.87912	1.0656e-06	1.38572e-05	AAEL020842
LOC5570534	3042.78	-1.00035	0.205141	-4.87641	1.08032e-06	1.40344e-05	AAEL001421	high density lipoprotien binding protein / vigilin [Source:VB Community Annotation]			GO:0003676,GO:0003723	nucleic acid binding,RNA binding
LOC5569462	953.485	-0.863033	0.177006	-4.87572	1.08411e-06	1.40694e-05	AAEL027751				GO:0005524,GO:0006464	ATP binding,cellular protein modification process
LOC5570883	86.665	2.26682	0.464941	4.8755	1.08535e-06	1.40713e-05	AAEL008658	leucine-rich immune protein (TM) [Source:VB Community Annotation]	LRIM16		GO:0005515,GO:0016020,GO:0016021	protein binding,membrane,integral component of membrane
LOC5579127	50.6832	1.96489	0.403029	4.87529	1.08646e-06	1.40715e-05	AAEL003853	nephrin [Source:VB Community Annotation]			GO:0005515	protein binding
LOC5574210	1039.3	-0.820649	0.168367	-4.87415	1.09275e-06	1.41388e-05	AAEL002317	Insulin-like receptor Precursor (MIR)(EC 2.7.10.1) [Source:VB Community Annotation]	InR		GO:0000166,GO:0004672,GO:0004713,GO:0004714,GO:0005009,GO:0005515,GO:0005524,GO:0005887,GO:0006468,GO:0007169,GO:0008286,GO:0016020,GO:0016021,GO:0016301,GO:0016310,GO:0016740,GO:0018108,GO:0043548,GO:0043559,GO:0043560,GO:0046777,GO:0046872,GO:0071469	nucleotide binding,protein kinase activity,protein tyrosine kinase activity,transmembrane receptor protein tyrosine kinase activity,insulin-activated receptor activity,protein binding,ATP binding,integral component of plasma membrane,protein phosphorylation,transmembrane receptor protein tyrosine kinase signaling pathway,insulin receptor signaling pathway,membrane,integral component of membrane,k…
LOC5573646	813.429	-0.78548	0.161276	-4.8704	1.11373e-06	1.43958e-05	AAEL023212				GO:0000786,GO:0003677,GO:0006334,GO:0042025	nucleosome,DNA binding,nucleosome assembly,host cell nucleus
LOC5571621	16.6491	4.75061	0.975497	4.86994	1.11635e-06	1.44151e-05	AAEL009199	core 1 UDP-galactose:n-acetylgalactosamine-alpha-r beta 1,3- galactosyltransferase [Source:VB Community Annotation]			GO:0006486,GO:0016020,GO:0016021,GO:0016263,GO:0016266,GO:0016757	protein glycosylation,membrane,integral component of membrane,glycoprotein-N-acetylgalactosamine 3-beta-galactosyltransferase activity,O-glycan processing,transferase activity, transferring glycosyl groups
LOC5571319	418.302	2.26676	0.466015	4.86413	1.14963e-06	1.48286e-05	AAEL008961				GO:0003676	nucleic acid binding
LOC5569907	18.8905	4.5809	0.941806	4.86395	1.15067e-06	1.48286e-05	AAEL007998
LOC5567679	2503.84	-0.62151	0.127811	-4.86272	1.15784e-06	1.4906e-05	AAEL006247				GO:0046872	metal ion binding
LOC5564183	2863.4	-1.06172	0.218581	-4.85735	1.18969e-06	1.53008e-05	AAEL004121	ubiquitin-conjugating enzyme E2 q [Source:VB Community Annotation]
LOC110676370	486.537	0.78697	0.162041	4.85661	1.1941e-06	1.53422e-05	AAEL021600
LOC5569180	643.328	1.3041	0.268531	4.8564	1.1954e-06	1.53436e-05	AAEL007444				GO:0003677,GO:0003700,GO:0005634,GO:0006355	DNA binding,DNA-binding transcription factor activity,nucleus,regulation of transcription, DNA-templated
LOC110681326	174.796	-1.0417	0.214842	-4.84867	1.24293e-06	1.59377e-05	AAEL020173
LOC5571312	1182.56	-0.711539	0.146808	-4.84674	1.25509e-06	1.60776e-05	AAEL019533				GO:0000166,GO:0000827,GO:0000829,GO:0000832,GO:0005524,GO:0005737,GO:0005829,GO:0016301,GO:0016310,GO:0016740,GO:0033857,GO:0052723,GO:0052724,GO:0102092	nucleotide binding,inositol-1,3,4,5,6-pentakisphosphate kinase activity,inositol heptakisphosphate kinase activity,inositol hexakisphosphate 5-kinase activity,ATP binding,cytoplasm,cytosol,kinase activity,phosphorylation,transferase activity,diphosphoinositol-pentakisphosphate kinase activity,inositol hexakisphosphate 1-kinase activity,inositol hexakisphosphate 3-kinase activity,5-diphosphoinosit…
LOC5568851	90.0243	1.80182	0.371894	4.84499	1.26618e-06	1.62035e-05	AAEL007164
LOC5573214	67.7099	2.15358	0.444646	4.84336	1.2766e-06	1.63207e-05	AAEL010327	Six/sine homebox transcription factors [Source:UniProtKB/TrEMBL;Acc:A0A1S4FPZ1]			GO:0000981,GO:0003677,GO:0005634,GO:0006355,GO:0006357,GO:0043565	DNA-binding transcription factor activity, RNA polymerase II-specific,DNA binding,nucleus,regulation of transcription, DNA-templated,regulation of transcription by RNA polymerase II,sequence-specific DNA binding
LOC23687516	89954	0.448406	0.0926016	4.84231	1.28337e-06	1.63901e-05	AAEL017096	Elongation factor 1-alpha [Source:UniProtKB/TrEMBL;Acc:Q1HR88]			GO:0000166,GO:0003746,GO:0003924,GO:0005525,GO:0005737,GO:0006412,GO:0006414	nucleotide binding,translation elongation factor activity,GTPase activity,GTP binding,cytoplasm,translation,translational elongation
LOC5579290	519.968	0.770643	0.159154	4.84213	1.28458e-06	1.63901e-05	AAEL001544				GO:0005737,GO:0005856,GO:0007015,GO:0031209,GO:0044877	cytoplasm,cytoskeleton,actin filament organization,SCAR complex,protein-containing complex binding
LOC5567534	52.5997	4.63805	0.958106	4.84085	1.29285e-06	1.64793e-05	AAEL006122
LOC5568763	942.619	1.19253	0.246363	4.84056	1.29475e-06	1.64872e-05	AAEL007121	tartan [Source:VB Community Annotation]			GO:0005515,GO:0016020,GO:0016021	protein binding,membrane,integral component of membrane
LOC110678325	36.107	-2.53807	0.524394	-4.84	1.29839e-06	1.65172e-05	AAEL025282
LOC5571186	3455.91	0.59192	0.122433	4.83465	1.33381e-06	1.69438e-05	AAEL029013				GO:0005739,GO:0008408,GO:0008409,GO:0090503	mitochondrion,3'-5' exonuclease activity,5'-3' exonuclease activity,RNA phosphodiester bond hydrolysis, exonucleolytic
LOC5564673	4410.77	-2.63667	0.545382	-4.83454	1.33455e-06	1.69438e-05	AAEL014557	homeobox protein caudal [Source:VB Community Annotation]	cad		GO:0000981,GO:0003677,GO:0005634,GO:0006355,GO:0006357,GO:0043565	DNA-binding transcription factor activity, RNA polymerase II-specific,DNA binding,nucleus,regulation of transcription, DNA-templated,regulation of transcription by RNA polymerase II,sequence-specific DNA binding
LOC5574708	149.509	1.07386	0.222139	4.83418	1.33698e-06	1.69579e-05	AAEL011338				GO:0005515	protein binding
LOC5570661	444.503	1.62284	0.335764	4.83326	1.34315e-06	1.70194e-05	AAEL008478
LOC5575759	3173.97	-0.694538	0.143946	-4.82499	1.4001e-06	1.77235e-05	AAEL019529				GO:0003676,GO:0005515,GO:0005634	nucleic acid binding,protein binding,nucleus
LOC5574468	18.1945	4.49655	0.932437	4.82237	1.41863e-06	1.79405e-05	AAEL002391	Carboxylic ester hydrolase [Source:UniProtKB/TrEMBL;Acc:A0A1S4F1M6]			GO:0016787,GO:0052689	hydrolase activity,carboxylic ester hydrolase activity
LOC5568952	41.5202	3.87915	0.804547	4.82153	1.42458e-06	1.79981e-05	AAEL007260				GO:0003676	nucleic acid binding
LOC110674382	13.9078	-7.12345	1.47761	-4.82092	1.42894e-06	1.80355e-05	AAEL024543
LOC110677659	40.542	-2.08238	0.432014	-4.82018	1.43432e-06	1.80856e-05	AAEL020156				GO:0004114,GO:0007165	3',5'-cyclic-nucleotide phosphodiesterase activity,signal transduction
LOC110679010	121.97	-3.1999	0.663921	-4.81969	1.43778e-06	1.81116e-05	AAEL027902				GO:0003676	nucleic acid binding
LOC5564305	1376.07	-1.34007	0.2782	-4.81693	1.45781e-06	1.83459e-05	AAEL001168				GO:0003700,GO:0005634,GO:0006357	DNA-binding transcription factor activity,nucleus,regulation of transcription by RNA polymerase II
LOC5569608	82.4878	1.70551	0.354117	4.81623	1.46294e-06	1.83857e-05	AAEL001271
LOC5572990	4898.36	-0.786196	0.163243	-4.81611	1.46383e-06	1.83857e-05	AAEL001939				GO:0000166,GO:0003676,GO:0005524,GO:0007275,GO:0007283,GO:0030154,GO:0031047,GO:0051321	nucleotide binding,nucleic acid binding,ATP binding,multicellular organism development,spermatogenesis,cell differentiation,gene silencing by RNA,meiotic cell cycle
LOC5571916	178.45	-5.07707	1.05437	-4.81527	1.47003e-06	1.84456e-05	AAEL021302				GO:0003676,GO:0003723,GO:0003724,GO:0004386,GO:0005737,GO:0032574,GO:0035194	nucleic acid binding,RNA binding,RNA helicase activity,helicase activity,cytoplasm,5'-3' RNA helicase activity,post-transcriptional gene silencing by RNA
LOC5575776	53.6464	2.82888	0.587661	4.81379	1.48094e-06	1.85556e-05	AAEL002718	chitin synthase [Source:VB Community Annotation]			GO:0004100,GO:0016020,GO:0016021,GO:0016758	chitin synthase activity,membrane,integral component of membrane,transferase activity, transferring hexosyl groups
LOC5577235	42.0617	2.43573	0.506001	4.81369	1.48168e-06	1.85556e-05	AAEL003150	alpha-n-acetylglucosaminidase [Source:VB Community Annotation]			GO:0016787	hydrolase activity
LOC5563742	1402.3	-0.867545	0.180251	-4.81298	1.48697e-06	1.86038e-05	AAEL014098	polycomb protein [Source:VB Community Annotation]			GO:0005634	nucleus
LOC5571653	999.417	-0.753725	0.156667	-4.81101	1.50168e-06	1.87696e-05	AAEL001635				GO:0005515	protein binding
LOC5573357	512.461	-0.706093	0.146819	-4.80928	1.51478e-06	1.89149e-05	AAEL010447
LOC110676546	46.1809	2.2478	0.46767	4.80639	1.53682e-06	1.91715e-05	AAEL020688
LOC5572437	30.365	3.89082	0.810076	4.80303	1.56286e-06	1.94775e-05	AAEL001803				GO:0016020,GO:0016021	membrane,integral component of membrane
LOC5578878	658.863	-3.66625	0.763429	-4.80234	1.5682e-06	1.95252e-05	AAEL013882	tkr [Source:VB Community Annotation]			GO:0003677,GO:0005515,GO:0005634	DNA binding,protein binding,nucleus
LOC5576107	1388.74	0.651444	0.135667	4.80179	1.5725e-06	1.95597e-05	AAEL002813	coupling factor, putative [Source:VB Community Annotation]			GO:0000276,GO:0005739,GO:0005743,GO:0006811,GO:0015078,GO:0015986,GO:0016020,GO:0045263	mitochondrial proton-transporting ATP synthase complex, coupling factor F(o),mitochondrion,mitochondrial inner membrane,ion transport,proton transmembrane transporter activity,ATP synthesis coupled proton transport,membrane,proton-transporting ATP synthase complex, coupling factor F(o)
LOC5567648	722.068	-0.775457	0.161513	-4.80121	1.57709e-06	1.95979e-05	AAEL006231	paraflagellar rod protein, putative [Source:VB Community Annotation]
LOC110681527	119.282	-2.6627	0.554649	-4.80069	1.58119e-06	1.96299e-05	AAEL021704				GO:0003676,GO:0046872	nucleic acid binding,metal ion binding
LOC5566587	806.459	0.631985	0.131718	4.798	1.60255e-06	1.98759e-05	AAEL000753				GO:0003676,GO:0003700,GO:0005634,GO:0006355,GO:0008270,GO:0046872	nucleic acid binding,DNA-binding transcription factor activity,nucleus,regulation of transcription, DNA-templated,zinc ion binding,metal ion binding
LOC5576518	83.7711	2.29231	0.477791	4.79772	1.60483e-06	1.98851e-05	AAEL012578	Phosphoserine aminotransferase [Source:UniProtKB/TrEMBL;Acc:Q1HRL1]			GO:0003824,GO:0004648,GO:0006564,GO:0008483,GO:0008652,GO:0016740	catalytic activity,O-phospho-L-serine:2-oxoglutarate aminotransferase activity,L-serine biosynthetic process,transaminase activity,cellular amino acid biosynthetic process,transferase activity
LOC5572327	24.4424	3.03003	0.63185	4.79548	1.62282e-06	2.00886e-05	AAEL009723	fibrinogen and fibronectin [Source:VB Community Annotation]
LOC5564914	138.819	5.53558	1.15468	4.79405	1.63449e-06	2.02136e-05	AAEL014655
LOC110676862	21.82	5.6241	1.17442	4.78884	1.6775e-06	2.07257e-05	AAEL007963				GO:0005201,GO:0005581	extracellular matrix structural constituent,collagen trimer
LOC5569133	1478.7	-0.743173	0.15531	-4.78511	1.70897e-06	2.10943e-05	AAEL019707				GO:0016020,GO:0016021	membrane,integral component of membrane
LOC5565095	7245.9	-0.868024	0.18141	-4.78487	1.71098e-06	2.10989e-05	AAEL004589	small calcium-binding mitochondrial carrier, putative [Source:VB Community Annotation]			GO:0005347,GO:0005509,GO:0005739,GO:0005743,GO:0015867,GO:0016020,GO:0016021,GO:0022857,GO:0055085	ATP transmembrane transporter activity,calcium ion binding,mitochondrion,mitochondrial inner membrane,ATP transport,membrane,integral component of membrane,transmembrane transporter activity,transmembrane transport
LOC5572296	1121.2	0.628939	0.13145	4.78463	1.71305e-06	2.11041e-05	AAEL001767				GO:0016020,GO:0016021	membrane,integral component of membrane
LOC110676442	126.741	1.23312	0.25786	4.78215	1.73433e-06	2.13282e-05	AAEL022617
LOC5568062	88.4491	1.75058	0.366067	4.78212	1.73456e-06	2.13282e-05	AAEL006482	sugar transporter [Source:VB Community Annotation]			GO:0016020,GO:0016021,GO:0022857,GO:0055085	membrane,integral component of membrane,transmembrane transporter activity,transmembrane transport
LOC110675542	37.0275	2.07108	0.43313	4.78165	1.73863e-06	2.1358e-05	AAEL023449
LOC5580130	306.071	-0.920156	0.192509	-4.77982	1.75454e-06	2.15328e-05	AAEL002451	zinc finger protein [Source:VB Community Annotation]			GO:0000981,GO:0003676,GO:0003677,GO:0005634,GO:0006355,GO:0006357,GO:0043565	DNA-binding transcription factor activity, RNA polymerase II-specific,nucleic acid binding,DNA binding,nucleus,regulation of transcription, DNA-templated,regulation of transcription by RNA polymerase II,sequence-specific DNA binding
LOC5568820	981.392	-0.651869	0.136393	-4.77935	1.75865e-06	2.15627e-05	AAEL001176	s-adenosylmethionine decarboxylase [Source:VB Community Annotation]			GO:0004014,GO:0006557,GO:0006596,GO:0006597,GO:0008295,GO:0016829,GO:0016831	adenosylmethionine decarboxylase activity,S-adenosylmethioninamine biosynthetic process,polyamine biosynthetic process,spermine biosynthetic process,spermidine biosynthetic process,lyase activity,carboxy-lyase activity
LOC5573520	555.403	0.691085	0.144637	4.77807	1.76982e-06	2.16791e-05	AAEL010569	chondroitin synthase [Source:VB Community Annotation]			GO:0005794,GO:0008376,GO:0016020,GO:0016021,GO:0016740,GO:0032580	Golgi apparatus,acetylgalactosaminyltransferase activity,membrane,integral component of membrane,transferase activity,Golgi cisterna membrane
LOC5579213	1071.1	-0.784849	0.16428	-4.7775	1.77492e-06	2.17208e-05	AAEL014051	nop14 [Source:VB Community Annotation]			GO:0005634,GO:0005730,GO:0032040,GO:0042254	nucleus,nucleolus,small-subunit processome,ribosome biogenesis
LOC5580320	1011.53	0.67776	0.141971	4.77394	1.80655e-06	2.2087e-05	AAEL019791				GO:0006338,GO:0043486,GO:0046872	chromatin remodeling,histone exchange,metal ion binding
LOC5565621	1698.49	-0.600255	0.125743	-4.77365	1.80913e-06	2.20975e-05	AAEL020696				GO:0006812,GO:0006829,GO:0008324,GO:0016020,GO:0016021,GO:0055085,GO:0098655	cation transport,zinc ion transport,cation transmembrane transporter activity,membrane,integral component of membrane,transmembrane transport,cation transmembrane transport
LOC5571127	40.8886	2.30379	0.482721	4.7725	1.81952e-06	2.22033e-05	AAEL019751				GO:0004623,GO:0005576,GO:0006629,GO:0006644,GO:0016042,GO:0016787,GO:0046872,GO:0050482,GO:0102567,GO:0102568	phospholipase A2 activity,extracellular region,lipid metabolic process,phospholipid metabolic process,lipid catabolic process,hydrolase activity,metal ion binding,arachidonic acid secretion,phospholipase A2 activity (consuming 1,2-dipalmitoylphosphatidylcholine),phospholipase A2 activity consuming 1,2-dioleoylphosphatidylethanolamine)
LOC5568484	1167.23	-0.588955	0.123416	-4.77212	1.82301e-06	2.22249e-05	AAEL021556				GO:0003779,GO:0005515,GO:0016491,GO:0046872,GO:0055114	actin binding,protein binding,oxidoreductase activity,metal ion binding,oxidation-reduction process
LOC5578730	974.099	-0.741776	0.155461	-4.77145	1.82901e-06	2.22769e-05	AAEL013839
LOC5577360	34.9121	2.19175	0.459455	4.77033	1.83925e-06	2.23742e-05	AAEL000445				GO:0005576	extracellular region
LOC5578442	170.024	0.93567	0.196149	4.77019	1.84048e-06	2.23742e-05	AAEL000512	Dynein heavy chain [Source:UniProtKB/TrEMBL;Acc:A0A1S4EW29]			GO:0000166,GO:0003774,GO:0003777,GO:0005524,GO:0005737,GO:0005856,GO:0005858,GO:0005874,GO:0005929,GO:0007018,GO:0008569,GO:0016020,GO:0016021,GO:0016887,GO:0030286,GO:0042995,GO:0060285	nucleotide binding,motor activity,microtubule motor activity,ATP binding,cytoplasm,cytoskeleton,axonemal dynein complex,microtubule,cilium,microtubule-based movement,ATP-dependent microtubule motor activity, minus-end-directed,membrane,integral component of membrane,ATPase activity,dynein complex,cell projection,cilium-dependent cell motility
LOC5567209	97.2598	-2.41503	0.506737	-4.76584	1.88067e-06	2.28413e-05	AAEL000897				GO:0005515	protein binding
LOC5566092	2626.19	0.650795	0.136661	4.7621	1.91592e-06	2.323e-05	AAEL005170	cytochrome c oxidase subunit iv [Source:VB Community Annotation]			GO:0004129,GO:0005739,GO:0006119,GO:0016020,GO:0022900,GO:1902600	cytochrome-c oxidase activity,mitochondrion,oxidative phosphorylation,membrane,electron transport chain,proton transmembrane transport
LOC110680755	12626.1	0.454301	0.0954002	4.76206	1.91629e-06	2.323e-05	AAEL025082	Peptidyl-prolyl cis-trans isomerase [Source:UniProtKB/TrEMBL;Acc:Q16P59]
LOC5575911	1058.86	-0.557951	0.117173	-4.76178	1.9189e-06	2.32399e-05	AAEL021400				GO:0005515	protein binding
LOC5578920	16.2576	4.72813	0.993267	4.76018	1.93424e-06	2.34036e-05	AAEL003748	cytochrome P450 [Source:VB Community Annotation]	CYP9AE1		GO:0004497,GO:0005506,GO:0005789,GO:0016020,GO:0016491,GO:0016705,GO:0020037,GO:0031090,GO:0046872,GO:0055114	monooxygenase activity,iron ion binding,endoplasmic reticulum membrane,membrane,oxidoreductase activity,oxidoreductase activity, acting on paired donors, with incorporation or reduction of molecular oxygen,heme binding,organelle membrane,metal ion binding,oxidation-reduction process
LOC110679593	88.2457	3.16191	0.664659	4.75719	1.96303e-06	2.37296e-05	AAEL026911
LOC5570536	58.2658	1.965	0.413293	4.7545	1.9894e-06	2.40258e-05	AAEL001437				GO:0005515,GO:0006355	protein binding,regulation of transcription, DNA-templated
LOC110676787	43.8829	-2.76996	0.582719	-4.75351	1.99917e-06	2.41212e-05	AAEL027718
LOC5573704	3588.99	-0.543256	0.114374	-4.74984	2.03581e-06	2.45402e-05	AAEL010698	importin beta-4 [Source:VB Community Annotation]			GO:0005515,GO:0005634,GO:0005737,GO:0006606,GO:0006886,GO:0008536,GO:0015031	protein binding,nucleus,cytoplasm,protein import into nucleus,intracellular protein transport,Ran GTPase binding,protein transport
LOC5564679	18935.7	-0.998762	0.210444	-4.74598	2.07502e-06	2.49881e-05	AAEL004390	heme peroxidase [Source:VB Community Annotation]	HPX8B		GO:0004601,GO:0006979,GO:0020037,GO:0048477,GO:0055114,GO:0098869	peroxidase activity,response to oxidative stress,heme binding,oogenesis,oxidation-reduction process,cellular oxidant detoxification
LOC5576722	46.0618	-2.66709	0.56199	-4.7458	2.07684e-06	2.49881e-05	AAEL027938				GO:0005525	GTP binding
LOC5564154	704.436	1.09855	0.231593	4.74345	2.10111e-06	2.52565e-05	AAEL027069				GO:0016021	integral component of membrane
LOC5572395	1265.48	-0.831314	0.175262	-4.74325	2.10314e-06	2.52573e-05	AAEL026010				GO:0031929,GO:0031932	TOR signaling,TORC2 complex
LOC5563591	3929.04	-0.62786	0.132554	-4.73665	2.17281e-06	2.60697e-05	AAEL000006	phosphoenolpyruvate carboxykinase [Source:VB Community Annotation]			GO:0000166,GO:0004611,GO:0004613,GO:0005525,GO:0006094,GO:0016829,GO:0016831,GO:0017076,GO:0046872	nucleotide binding,phosphoenolpyruvate carboxykinase activity,phosphoenolpyruvate carboxykinase (GTP) activity,GTP binding,gluconeogenesis,lyase activity,carboxy-lyase activity,purine nucleotide binding,metal ion binding
LOC5573060	4907.46	0.525824	0.111019	4.73634	2.17607e-06	2.60845e-05	AAEL010244	abrupt protein [Source:VB Community Annotation]			GO:0005515	protein binding
LOC5571169	152.989	3.02245	0.638435	4.73416	2.19969e-06	2.6343e-05	AAEL008856
LOC5570433	3013.14	0.582671	0.123139	4.73183	2.225e-06	2.66215e-05	AAEL019748				GO:0016020,GO:0016021	membrane,integral component of membrane
LOC5578210	59.4543	3.08338	0.652211	4.72758	2.27208e-06	2.71594e-05	AAEL003483
LOC5567793	952.197	0.751234	0.158917	4.72721	2.27623e-06	2.71839e-05	AAEL000138	NADH dehydrogenase, putative [Source:VB Community Annotation]			GO:0005739,GO:0005743,GO:0016020,GO:0055114,GO:0070469	mitochondrion,mitochondrial inner membrane,membrane,oxidation-reduction process,respirasome
LOC5579899	540.629	0.646528	0.136814	4.72561	2.29421e-06	2.73732e-05	AAEL001016	zinc finger protein [Source:VB Community Annotation]			GO:0003676,GO:0005634,GO:0008270,GO:0046872	nucleic acid binding,nucleus,zinc ion binding,metal ion binding
LOC5580191	326.433	-0.890006	0.188386	-4.72438	2.30823e-06	2.75149e-05	AAEL002556				GO:0005515	protein binding
LOC5577113	2993.75	0.627363	0.132815	4.72357	2.3174e-06	2.75988e-05	AAEL008697	cytochrome c oxidase, subunit VB, putative [Source:VB Community Annotation]			GO:0004129,GO:0005740,GO:0022900,GO:1902600	cytochrome-c oxidase activity,mitochondrial envelope,electron transport chain,proton transmembrane transport
LOC110674129	167.112	-1.91293	0.405027	-4.72298	2.32418e-06	2.76539e-05	AAEL027387
LOC5577702	177.341	-1.43968	0.30511	-4.71857	2.37509e-06	2.82335e-05	AAEL013335				GO:0016020,GO:0016021	membrane,integral component of membrane
LOC23687871	6866.02	-1.27048	0.269329	-4.71721	2.39099e-06	2.83963e-05	AAEL017451	Angiotensin-converting enzyme [Source:UniProtKB/TrEMBL;Acc:J9HF68]			GO:0004180,GO:0006508,GO:0008233,GO:0008237,GO:0008241,GO:0016020,GO:0016787,GO:0046872	carboxypeptidase activity,proteolysis,peptidase activity,metallopeptidase activity,peptidyl-dipeptidase activity,membrane,hydrolase activity,metal ion binding
LOC5574553	162.679	1.62947	0.345462	4.7168	2.39582e-06	2.84075e-05	AAEL011227				GO:0005515	protein binding
LOC5573285	865.104	-0.709168	0.150351	-4.71676	2.39634e-06	2.84075e-05	AAEL010378				GO:0005515,GO:0007605,GO:0050953,GO:0050957	protein binding,sensory perception of sound,sensory perception of light stimulus,equilibrioception
LOC5565760	1468.57	-0.478547	0.101567	-4.71163	2.45744e-06	2.90847e-05	AAEL004981	cation-transporting ATPase [Source:VB Community Annotation]			GO:0000166,GO:0000287,GO:0004012,GO:0005524,GO:0005802,GO:0015914,GO:0016020,GO:0016021,GO:0034204,GO:0140326	nucleotide binding,magnesium ion binding,GO_0004012,ATP binding,trans-Golgi network,phospholipid transport,membrane,integral component of membrane,lipid translocation,ATPase-coupled intramembrane lipid transporter activity
LOC23687980	771.738	-0.978829	0.207754	-4.71147	2.4593e-06	2.90847e-05	AAEL017560				GO:0005515	protein binding
LOC110674233	82.8592	1.34869	0.286261	4.7114	2.46024e-06	2.90847e-05	AAEL020626
LOC5567477	69.599	2.04758	0.434834	4.70889	2.49075e-06	2.94171e-05	AAEL000933				GO:0016020,GO:0016021	membrane,integral component of membrane
LOC5571496	725.291	0.831075	0.176498	4.70871	2.49294e-06	2.94171e-05	AAEL001627	udp-n-acteylglucosamine pyrophosphorylase [Source:VB Community Annotation]			GO:0016740,GO:0070569	transferase activity,uridylyltransferase activity
LOC5576724	68.1955	-3.4583	0.734507	-4.70832	2.49761e-06	2.94452e-05	AAEL002959	brain chitinase and chia [Source:VB Community Annotation]			GO:0005975,GO:0008061	carbohydrate metabolic process,chitin binding
LOC5578695	87.5396	1.24506	0.264453	4.70806	2.5009e-06	2.94571e-05	AAEL003613		sage		GO:0003700,GO:0006355,GO:0046983	DNA-binding transcription factor activity,regulation of transcription, DNA-templated,protein dimerization activity
LOC5565932	42.368	3.23678	0.687609	4.70729	2.51033e-06	2.95411e-05	AAEL005076	alanyl aminopeptidase [Source:VB Community Annotation]			GO:0006508,GO:0008233,GO:0008237,GO:0008270,GO:0016787,GO:0046872	proteolysis,peptidase activity,metallopeptidase activity,zinc ion binding,hydrolase activity,metal ion binding
LOC110681378	1237.77	-0.807869	0.171687	-4.70547	2.5328e-06	2.97783e-05	AAEL027396				GO:0005634,GO:0005730,GO:0032040,GO:0042254	nucleus,nucleolus,small-subunit processome,ribosome biogenesis
LOC5578538	782.008	0.68434	0.14548	4.70401	2.55104e-06	2.99549e-05	AAEL013744	NADH:ubiquinone dehydrogenase, putative [Source:VB Community Annotation]			GO:0005739,GO:0005743,GO:0016020,GO:0016651,GO:0022900,GO:0055114,GO:0070469	mitochondrion,mitochondrial inner membrane,membrane,oxidoreductase activity, acting on NAD(P)H,electron transport chain,oxidation-reduction process,respirasome
LOC5574802	957.163	0.75999	0.161569	4.7038	2.55365e-06	2.99549e-05	AAEL024570				GO:0000166,GO:0004672,GO:0004713,GO:0004715,GO:0005524,GO:0006468,GO:0016301,GO:0016310,GO:0016740,GO:0018108	nucleotide binding,protein kinase activity,protein tyrosine kinase activity,non-membrane spanning protein tyrosine kinase activity,ATP binding,protein phosphorylation,kinase activity,phosphorylation,transferase activity,peptidyl-tyrosine phosphorylation
LOC5563985	289.601	1.69811	0.361014	4.70371	2.5548e-06	2.99549e-05	AAEL004021	Glucose dehydrogenase [Source:UniProtKB/TrEMBL;Acc:A0A1S4F6C5]			GO:0016614,GO:0050660,GO:0055114	oxidoreductase activity, acting on CH-OH group of donors,flavin adenine dinucleotide binding,oxidation-reduction process
LOC23687956	126.386	2.43513	0.51855	4.69603	2.6526e-06	3.10733e-05	AAEL017536	holotricin glycine rich repeat protein (GRRP) anti-microbial peptide [Source:VB Community Annotation]	GRRP
LOC5572351	746.368	-0.764021	0.162864	-4.69115	2.71668e-06	3.17915e-05	AAEL014519	cbl-d [Source:VB Community Annotation]			GO:0001784,GO:0004842,GO:0005509,GO:0005515,GO:0007166,GO:0016567,GO:0016740,GO:0023051,GO:0046872,GO:0047690	phosphotyrosine residue binding,ubiquitin-protein transferase activity,calcium ion binding,protein binding,cell surface receptor signaling pathway,protein ubiquitination,transferase activity,regulation of signaling,metal ion binding,aspartyltransferase activity
LOC5572096	90.7522	-1.62078	0.345509	-4.69099	2.71885e-06	3.17915e-05	AAEL025643
LOC5566204	144.344	1.77734	0.3793	4.68584	2.78813e-06	3.2572e-05	AAEL027520				GO:0004888,GO:0004890,GO:0005216,GO:0005230,GO:0006811,GO:0016020,GO:0016021,GO:0034220	transmembrane signaling receptor activity,GABA-A receptor activity,ion channel activity,extracellular ligand-gated ion channel activity,ion transport,membrane,integral component of membrane,ion transmembrane transport
LOC5579328	1996.41	0.626029	0.133663	4.68364	2.81825e-06	3.28941e-05	AAEL023188				GO:0005783,GO:0005789,GO:0006486,GO:0006487,GO:0008250,GO:0016020,GO:0016021	endoplasmic reticulum,endoplasmic reticulum membrane,protein glycosylation,protein N-linked glycosylation,oligosaccharyltransferase complex,membrane,integral component of membrane
LOC5571658	14221	-0.963569	0.205793	-4.68223	2.83765e-06	3.30905e-05	AAEL001666				GO:0005777,GO:0010468	peroxisome,regulation of gene expression
LOC5575101	1244.49	-0.845002	0.180666	-4.67715	2.90887e-06	3.38903e-05	AAEL011663				GO:0006886	intracellular protein transport
LOC5568113	1434.71	0.503585	0.107723	4.6748	2.94236e-06	3.42495e-05	AAEL006557				GO:0003677	DNA binding
LOC110678979	32.3827	2.74242	0.586686	4.67443	2.94766e-06	3.42802e-05	AAEL026887
LOC5567490	1666	-0.75626	0.161818	-4.67352	2.9608e-06	3.4402e-05	AAEL000949				GO:0005783,GO:0005789,GO:0016020,GO:0016021,GO:0023041,GO:0030867,GO:0031965	endoplasmic reticulum,endoplasmic reticulum membrane,membrane,integral component of membrane,neuronal signal transduction,rough endoplasmic reticulum membrane,nuclear membrane
LOC5570923	793.168	-0.886276	0.189658	-4.67303	2.96785e-06	3.44527e-05	AAEL001473	dynamin-associated protein [Source:VB Community Annotation]			GO:0005509,GO:0005515	calcium ion binding,protein binding
LOC110681331	18.5633	-3.3725	0.721724	-4.67284	2.9707e-06	3.44547e-05	AAEL021880				GO:0004888,GO:0004890,GO:0005216,GO:0006811,GO:0016020,GO:0016021,GO:0034220	transmembrane signaling receptor activity,GABA-A receptor activity,ion channel activity,ion transport,membrane,integral component of membrane,ion transmembrane transport
LOC5569818	26.9636	3.05009	0.652961	4.67117	2.99492e-06	3.47044e-05	AAEL025053
LOC5566349	2236.73	-0.521497	0.111648	-4.67088	2.99909e-06	3.47215e-05	AAEL019854				GO:0004842,GO:0005515,GO:0005737,GO:0007219,GO:0008270,GO:0016567,GO:0016740,GO:0046872	ubiquitin-protein transferase activity,protein binding,cytoplasm,Notch signaling pathway,zinc ion binding,protein ubiquitination,transferase activity,metal ion binding
LOC110680256	504.399	0.660719	0.141484	4.66991	3.01325e-06	3.48541e-05	AAEL025207				GO:0003676	nucleic acid binding
LOC5571510	99.0532	-1.34434	0.288028	-4.6674	3.05034e-06	3.52514e-05	AAEL021006				GO:0004114,GO:0007165,GO:0008081,GO:0016787,GO:0046872	3',5'-cyclic-nucleotide phosphodiesterase activity,signal transduction,phosphoric diester hydrolase activity,hydrolase activity,metal ion binding
LOC110680251	344.132	-1.05071	0.225199	-4.66571	3.07546e-06	3.5484e-05	AAEL023417
LOC5578230	1407.89	-0.959129	0.205578	-4.66553	3.07828e-06	3.5484e-05	AAEL018267				GO:0000166,GO:0005524,GO:0016020,GO:0016021,GO:0016887,GO:0042626,GO:0055085	nucleotide binding,ATP binding,membrane,integral component of membrane,ATPase activity,ATPase-coupled transmembrane transporter activity,transmembrane transport
LOC5563948	795.593	-0.695091	0.148985	-4.6655	3.07874e-06	3.5484e-05	AAEL021054				GO:0004445,GO:0016311,GO:0046856	inositol-polyphosphate 5-phosphatase activity,dephosphorylation,phosphatidylinositol dephosphorylation
LOC5566360	344.289	-1.05169	0.225427	-4.66531	3.08149e-06	3.5484e-05	AAEL023417				GO:0005634	nucleus
LOC5573447	55.0532	1.93209	0.4142	4.66464	3.09165e-06	3.55691e-05	AAEL026037
LOC5574512	39.1113	3.11261	0.667641	4.6621	3.13006e-06	3.5979e-05	AAEL011193	steroid dehydrogenase [Source:VB Community Annotation]			GO:0016491,GO:0055114	oxidoreductase activity,oxidation-reduction process
LOC5574155	267.189	-0.871986	0.18715	-4.65929	3.17296e-06	3.64395e-05	AAEL010964
LOC5571306	1511.92	-1.07518	0.230815	-4.65818	3.19019e-06	3.66047e-05	AAEL008960	Regulator of telomere elongation helicase 1 homolog (EC 3.6.4.12) [Source:VB Community Annotation]			GO:0000166,GO:0000723,GO:0003676,GO:0003677,GO:0003678,GO:0004003,GO:0004386,GO:0005524,GO:0005634,GO:0006139,GO:0006260,GO:0006281,GO:0006310,GO:0006974,GO:0010569,GO:0016787,GO:0016818,GO:0032508,GO:0046872,GO:0051536,GO:0051539	nucleotide binding,telomere maintenance,nucleic acid binding,DNA binding,DNA helicase activity,GO_0004003,helicase activity,ATP binding,nucleus,nucleobase-containing compound metabolic process,DNA replication,DNA repair,DNA recombination,cellular response to DNA damage stimulus,regulation of double-strand break repair via homologous recombination,hydrolase activity,hydrolase activity, acting on a…
LOC5571246	444.113	-0.70107	0.15058	-4.65582	3.22701e-06	3.69775e-05	AAEL001551				GO:0003676,GO:0005634,GO:0008270,GO:0046872	nucleic acid binding,nucleus,zinc ion binding,metal ion binding
LOC5570925	221.238	1.48536	0.319039	4.65573	3.22842e-06	3.69775e-05	AAEL001500	insulinprotein enhancer protein isl [Source:VB Community Annotation]			GO:0000981,GO:0003677,GO:0005634,GO:0006355,GO:0006357,GO:0043565,GO:0046872	DNA-binding transcription factor activity, RNA polymerase II-specific,DNA binding,nucleus,regulation of transcription, DNA-templated,regulation of transcription by RNA polymerase II,sequence-specific DNA binding,metal ion binding
LOC5564303	1707.3	-0.996067	0.214059	-4.65323	3.26779e-06	3.73952e-05	AAEL000564	myotubularin [Source:VB Community Annotation]			GO:0004438,GO:0004725,GO:0005737,GO:0006629,GO:0016020,GO:0016311,GO:0035335,GO:0046872	phosphatidylinositol-3-phosphatase activity,protein tyrosine phosphatase activity,cytoplasm,lipid metabolic process,membrane,dephosphorylation,peptidyl-tyrosine dephosphorylation,metal ion binding
LOC5565323	2288.05	0.6594	0.141718	4.65291	3.27289e-06	3.74202e-05	AAEL004709	protein phosphatase type 2c [Source:VB Community Annotation]			GO:0003824,GO:0004721,GO:0004722,GO:0006470,GO:0016020,GO:0016021,GO:0016787,GO:0016791,GO:0043169,GO:0046872	catalytic activity,phosphoprotein phosphatase activity,protein serine/threonine phosphatase activity,protein dephosphorylation,membrane,integral component of membrane,hydrolase activity,phosphatase activity,cation binding,metal ion binding
LOC5563910	834.938	0.626144	0.134591	4.6522	3.28413e-06	3.75154e-05	AAEL027639
LOC5577136	42.0175	3.29275	0.708395	4.64818	3.34879e-06	3.82201e-05	AAEL003115	tartan [Source:VB Community Annotation]			GO:0005515,GO:0016020,GO:0016021	protein binding,membrane,integral component of membrane
LOC5568387	637.478	0.588211	0.126573	4.64722	3.36443e-06	3.83647e-05	AAEL006771				GO:0016020,GO:0016021	membrane,integral component of membrane
LOC5567533	1057.92	-0.606919	0.13061	-4.64682	3.37093e-06	3.84047e-05	AAEL006140	mitosis inhibitor protein kinase [Source:VB Community Annotation]			GO:0000166,GO:0004672,GO:0004674,GO:0005524,GO:0006468,GO:0016020	nucleotide binding,protein kinase activity,protein serine/threonine kinase activity,ATP binding,protein phosphorylation,membrane
LOC5567597	326.596	-1.71364	0.368935	-4.64484	3.40338e-06	3.87401e-05	AAEL006191				GO:0005515,GO:0005856,GO:0007165	protein binding,cytoskeleton,signal transduction
LOC5580214	1930.41	-0.624544	0.134471	-4.64443	3.41011e-06	3.87825e-05	AAEL011918				GO:0006629,GO:0016042,GO:0016787	lipid metabolic process,lipid catabolic process,hydrolase activity
LOC5564816	1745.79	0.545931	0.117553	4.64414	3.41498e-06	3.8799e-05	AAEL014636	rhoGTPase [Source:VB Community Annotation]			GO:0003924,GO:0005515,GO:0005525,GO:0007264	GTPase activity,protein binding,GTP binding,small GTPase mediated signal transduction
LOC5579965	200.992	1.23813	0.266609	4.64398	3.41759e-06	3.8799e-05	AAEL025755				GO:0003824	catalytic activity
LOC5566454	511.355	-0.638133	0.13753	-4.63997	3.4846e-06	3.95249e-05	AAEL014176	cornichon [Source:VB Community Annotation]
LOC5564209	169.261	1.54673	0.333392	4.63938	3.49463e-06	3.96038e-05	AAEL014361	amidase [Source:VB Community Annotation]			GO:0005739	mitochondrion
LOC5572455	102.525	2.83514	0.611458	4.63669	3.54038e-06	4.00869e-05	AAEL001836	odorant-binding protein 56a, putative [Source:VB Community Annotation]			GO:0005549	odorant binding
LOC5566220	52.286	1.96051	0.423019	4.63457	3.57678e-06	4.04636e-05	AAEL005270				GO:0016740	transferase activity
LOC5573615	2027.95	0.578346	0.124876	4.63137	3.63245e-06	4.10572e-05	AAEL010611	Acyl carrier protein [Source:UniProtKB/TrEMBL;Acc:Q16PC9]			GO:0006629,GO:0006631,GO:0006633	lipid metabolic process,fatty acid metabolic process,fatty acid biosynthetic process
LOC5563679	22.4615	3.22178	0.69572	4.63086	3.64159e-06	4.11244e-05	AAEL000530	Carboxylic ester hydrolase [Source:UniProtKB/TrEMBL;Acc:A0A1S4EW81]			GO:0016787,GO:0052689	hydrolase activity,carboxylic ester hydrolase activity
LOC5575391	257.328	0.809636	0.174845	4.6306	3.64612e-06	4.11395e-05	AAEL011799
LOC5570236	453.396	-0.654366	0.141337	-4.62981	3.65996e-06	4.12595e-05	AAEL008161	abnormal oocyte, putative [Source:VB Community Annotation]			GO:0005515	protein binding
LOC5567088	66.4847	1.55795	0.336559	4.62904	3.67361e-06	4.13472e-05	AAEL025983				GO:0005634,GO:0005737,GO:0005813,GO:0005856,GO:0030030,GO:0042995,GO:0060271	nucleus,cytoplasm,centrosome,cytoskeleton,cell projection organization,cell projection,cilium assembly
LOC5567110	82.5057	1.27092	0.274556	4.62901	3.67417e-06	4.13472e-05	AAEL027459
LOC5570814	3921.43	-0.458408	0.0990791	-4.62669	3.71561e-06	4.17771e-05	AAEL008580				GO:0046872	metal ion binding
LOC5578608	3158.92	-0.460406	0.0995239	-4.62608	3.72648e-06	4.18628e-05	AAEL027860	caspar [Source:VB Community Annotation]	casp		GO:0005515	protein binding
LOC5565895	94.5489	2.9056	0.628163	4.62555	3.736e-06	4.19332e-05	AAEL019578				GO:0003676	nucleic acid binding
LOC5570994	1488.41	0.667164	0.144242	4.6253	3.74053e-06	4.19473e-05	AAEL008740	synaptic glycoprotein sc2 [Source:VB Community Annotation]			GO:0005515,GO:0005789,GO:0006629,GO:0016020,GO:0016021,GO:0016627,GO:0055114,GO:0102758	protein binding,endoplasmic reticulum membrane,lipid metabolic process,membrane,integral component of membrane,oxidoreductase activity, acting on the CH-CH group of donors,oxidation-reduction process,very-long-chain enoyl-CoA reductase activity
LOC5578768	2939.17	-0.777282	0.168244	-4.61998	3.83779e-06	4.30006e-05	AAEL020484
LOC5573556	1176.36	0.741282	0.160463	4.61965	3.8438e-06	4.30305e-05	AAEL027408
LOC110677126	15.5905	-4.37972	0.948411	-4.61796	3.87527e-06	4.33451e-05	AAEL026977
LOC5566292	2900.66	-0.604428	0.130938	-4.61612	3.90972e-06	4.36925e-05	AAEL000739				GO:0005515	protein binding
LOC5576176	793.601	-0.513993	0.111377	-4.61487	3.93338e-06	4.39161e-05	AAEL012378	serine-type protease inhibitor [Source:VB Community Annotation]			GO:0005515	protein binding
LOC5573621	374.781	-0.765985	0.165988	-4.6147	3.93655e-06	4.39161e-05	AAEL027116				GO:0003677,GO:0003899,GO:0005634,GO:0006351,GO:0016740,GO:0016779	DNA binding,DNA-directed 5'-3' RNA polymerase activity,nucleus,transcription, DNA-templated,transferase activity,nucleotidyltransferase activity
LOC5573464	719.478	-0.835368	0.181081	-4.61322	3.96485e-06	4.41935e-05	AAEL010508	vacuolar protein sorting-associated protein (vps13) [Source:VB Community Annotation]
LOC110681333	303.196	-0.859361	0.186382	-4.61074	4.01244e-06	4.46852e-05	AAEL023005				GO:0097428	protein maturation by iron-sulfur cluster transfer
LOC110676328	26.1457	2.87556	0.623822	4.60958	4.03485e-06	4.4896e-05	AAEL026874
LOC5567188	69.0923	2.42414	0.525989	4.60872	4.05164e-06	4.50071e-05	AAEL000855	mannosyltransferase 1, [Source:VB Community Annotation]			GO:0000030,GO:0004169,GO:0005783,GO:0005789,GO:0006486,GO:0006493,GO:0016020,GO:0016021,GO:0016740,GO:0016757,GO:0035269,GO:0097502	mannosyltransferase activity,dolichyl-phosphate-mannose-protein mannosyltransferase activity,endoplasmic reticulum,endoplasmic reticulum membrane,protein glycosylation,protein O-linked glycosylation,membrane,integral component of membrane,transferase activity,transferase activity, transferring glycosyl groups,protein O-linked mannosylation,mannosylation
LOC5564865	3681.62	-0.802093	0.174039	-4.60871	4.05183e-06	4.50071e-05	AAEL018323				GO:0016020,GO:0016021,GO:0030176	membrane,integral component of membrane,integral component of endoplasmic reticulum membrane
LOC5575161	476.328	-1.05451	0.228829	-4.60831	4.05951e-06	4.50535e-05	AAEL000354	dimeric dihydrodiol dehydrogenase [Source:VB Community Annotation]			GO:0016491,GO:0055114	oxidoreductase activity,oxidation-reduction process
LOC5565855	78.2926	-1.44462	0.313581	-4.60683	4.08849e-06	4.53361e-05	AAEL005021
LOC5573480	53.7843	2.60433	0.565467	4.60563	4.11214e-06	4.55591e-05	AAEL010524				GO:0005125,GO:0005164,GO:0005515,GO:0005615,GO:0006955,GO:0007165,GO:0016020,GO:0016021	cytokine activity,tumor necrosis factor receptor binding,protein binding,extracellular space,immune response,signal transduction,membrane,integral component of membrane
LOC5576869	119.613	1.96118	0.425863	4.6052	4.12072e-06	4.56149e-05	AAEL019619				GO:0003779,GO:0005737,GO:0005856,GO:0030036	actin binding,cytoplasm,cytoskeleton,actin cytoskeleton organization
LOC110674128	170.595	-1.86095	0.404294	-4.60296	4.16526e-06	4.60684e-05	AAEL021820
LOC5576761	591.037	-0.769908	0.167291	-4.60222	4.18021e-06	4.6194e-05	AAEL018248				GO:0007165	signal transduction
LOC5572767	1267.89	-0.566893	0.123193	-4.60166	4.19139e-06	4.62778e-05	AAEL026439
LOC5574875	2905.39	-0.832643	0.180969	-4.60102	4.2043e-06	4.63806e-05	AAEL011469
LOC5580264	415.247	1.20517	0.261963	4.60056	4.21362e-06	4.64437e-05	AAEL002995	pyrazinamidase/nicotinamidase [Source:VB Community Annotation]			GO:0003824,GO:0005509	catalytic activity,calcium ion binding
LOC5566873	15.792	3.85671	0.839017	4.5967	4.29243e-06	4.72719e-05	AAEL000821	odorant binding protein OBP6 [Source:VB Community Annotation]	OBP6		GO:0004930,GO:0007186,GO:0016020,GO:0016021	G protein-coupled receptor activity,G protein-coupled receptor signaling pathway,membrane,integral component of membrane
LOC5578217	386.638	0.661779	0.143983	4.59624	4.30187e-06	4.72975e-05	AAEL003461	mitochondrial intermediate peptidase [Source:VB Community Annotation]			GO:0004222,GO:0005759,GO:0006508,GO:0006627,GO:0008233,GO:0008237,GO:0016787,GO:0046872	metalloendopeptidase activity,mitochondrial matrix,proteolysis,protein processing involved in protein targeting to mitochondrion,peptidase activity,metallopeptidase activity,hydrolase activity,metal ion binding
LOC5580186	709.717	0.606432	0.131941	4.59623	4.30211e-06	4.72975e-05	AAEL002562				GO:0003676,GO:0004526,GO:0005634,GO:0008033,GO:0016020,GO:0016021,GO:0016787,GO:0090501,GO:0090502	nucleic acid binding,ribonuclease P activity,nucleus,tRNA processing,membrane,integral component of membrane,hydrolase activity,RNA phosphodiester bond hydrolysis,RNA phosphodiester bond hydrolysis, endonucleolytic
LOC110675298	140.476	-1.88303	0.409794	-4.59506	4.32617e-06	4.75215e-05	AAEL023358
LOC5577977	36.3674	2.84225	0.619306	4.58941	4.44509e-06	4.87861e-05	AAEL013452
LOC110676230	526.399	-0.642884	0.140162	-4.58673	4.50235e-06	4.93724e-05	AAEL023044
LOC5574977	2010.66	0.732408	0.159742	4.58494	4.54124e-06	4.97566e-05	AAEL002504	ATP synthase delta chain, mitochondrial [Source:VB Community Annotation]			GO:0006811,GO:0015986,GO:0016020,GO:0045261,GO:0046933	ion transport,ATP synthesis coupled proton transport,membrane,proton-transporting ATP synthase complex, catalytic core F(1),proton-transporting ATP synthase activity, rotational mechanism
LOC5567874	2100.85	-0.647779	0.1414	-4.58118	4.62368e-06	5.06167e-05	AAEL006330	microtubule associated serine/threonine kinase [Source:VB Community Annotation]			GO:0000166,GO:0000287,GO:0004672,GO:0004674,GO:0005515,GO:0005524,GO:0006468,GO:0016301,GO:0016310,GO:0016740	nucleotide binding,magnesium ion binding,protein kinase activity,protein serine/threonine kinase activity,protein binding,ATP binding,protein phosphorylation,kinase activity,phosphorylation,transferase activity
LOC5572140	44.0648	-2.78934	0.609064	-4.57971	4.65621e-06	5.09295e-05	AAEL022562				GO:0004252,GO:0006508	serine-type endopeptidase activity,proteolysis
LOC5566358	7929.56	-0.61696	0.134728	-4.57931	4.66515e-06	5.09637e-05	AAEL005312				GO:0005515	protein binding
LOC5576751	596.193	-1.07851	0.235523	-4.57921	4.66725e-06	5.09637e-05	AAEL012744
LOC5571386	203.924	1.14394	0.249824	4.57899	4.67227e-06	5.09753e-05	AAEL009017	glutathione transferase [Source:VB Community Annotation]	GSTT1		GO:0004364,GO:0005515,GO:0016740	glutathione transferase activity,protein binding,transferase activity
LOC5570828	287.266	0.800316	0.174811	4.57818	4.69035e-06	5.11292e-05	AAEL008605	inosine triphosphate pyrophosphatase (itpase) (inosine triphosphatase) [Source:VB Community Annotation]			GO:0000166,GO:0004551,GO:0005737,GO:0009117,GO:0009143,GO:0009204,GO:0016787,GO:0035529,GO:0036218,GO:0046872,GO:0047429	nucleotide binding,nucleotide diphosphatase activity,cytoplasm,nucleotide metabolic process,nucleoside triphosphate catabolic process,deoxyribonucleoside triphosphate catabolic process,hydrolase activity,NADH pyrophosphatase activity,dTTP diphosphatase activity,metal ion binding,nucleoside-triphosphate diphosphatase activity
LOC5569200	72.6475	-1.42398	0.311051	-4.57795	4.69552e-06	5.11423e-05	AAEL007456	zinc finger protein, putative [Source:VB Community Annotation]			GO:0003676,GO:0005634,GO:0008270,GO:0046872	nucleic acid binding,nucleus,zinc ion binding,metal ion binding
LOC5570013	566.645	-0.736645	0.161066	-4.57357	4.79489e-06	5.21804e-05	AAEL000173	chromatin assembly factor-I p150 subunit, putative [Source:VB Community Annotation]			GO:0005634	nucleus
LOC5574494	4227.33	0.506471	0.110748	4.57316	4.8042e-06	5.22375e-05	AAEL002377	Small nuclear ribonucleoprotein-associated protein [Source:UniProtKB/TrEMBL;Acc:Q1HQD9]			GO:0003723,GO:0005634,GO:0006397	RNA binding,nucleus,mRNA processing
LOC5564044	67.1838	2.34297	0.512397	4.57256	4.81799e-06	5.23433e-05	AAEL025520				GO:0005085	guanyl-nucleotide exchange factor activity
LOC5579066	514.885	-0.600559	0.131393	-4.57069	4.86113e-06	5.27398e-05	AAEL014002				GO:0005515	protein binding
LOC5569863	4546.73	0.48835	0.106845	4.57063	4.86268e-06	5.27398e-05	AAEL007945	Eukaryotic translation initiation factor 3 subunit H (eIF3h) [Source:VB Community Annotation]			GO:0001732,GO:0002183,GO:0003743,GO:0005515,GO:0005737,GO:0005852,GO:0006412,GO:0006413,GO:0006508,GO:0008237,GO:0016282,GO:0033290,GO:0070122	formation of cytoplasmic translation initiation complex,cytoplasmic translational initiation,translation initiation factor activity,protein binding,cytoplasm,eukaryotic translation initiation factor 3 complex,translation,translational initiation,proteolysis,metallopeptidase activity,eukaryotic 43S preinitiation complex,eukaryotic 48S preinitiation complex,isopeptidase activity
LOC5564603	2866.28	-0.470074	0.102862	-4.56996	4.8781e-06	5.28625e-05	AAEL010086	DNA replication licensing factor MCM4 [Source:VB Community Annotation]			GO:0000166,GO:0003677,GO:0003678,GO:0004386,GO:0005524,GO:0005634,GO:0006260,GO:0006270,GO:0016787,GO:0032508,GO:0042555	nucleotide binding,DNA binding,DNA helicase activity,helicase activity,ATP binding,nucleus,DNA replication,DNA replication initiation,hydrolase activity,DNA duplex unwinding,MCM complex
LOC5567464	2509.13	0.609173	0.13331	4.56961	4.8864e-06	5.29079e-05	AAEL000930				GO:0005262,GO:0006811,GO:0006816,GO:0006897,GO:0016020,GO:0016021,GO:0030054,GO:0030672,GO:0031410,GO:0045202,GO:0070588	calcium channel activity,ion transport,calcium ion transport,endocytosis,membrane,integral component of membrane,cell junction,synaptic vesicle membrane,cytoplasmic vesicle,synapse,calcium ion transmembrane transport
LOC5567519	239.559	-1.06527	0.233151	-4.56901	4.90029e-06	5.30138e-05	AAEL006146
LOC5566608	805.793	0.607703	0.133124	4.56493	4.99657e-06	5.401e-05	AAEL000791				GO:0005739	mitochondrion
LOC5574676	2343.33	0.457359	0.100201	4.56444	5.00838e-06	5.40922e-05	AAEL011317	actin [Source:VB Community Annotation]
LOC5566123	438.836	1.68765	0.369848	4.56309	5.04061e-06	5.43947e-05	AAEL005187	laminin gamma 1 chain [Source:VB Community Annotation]
LOC110681072	342.997	-1.03135	0.226154	-4.56038	5.10612e-06	5.50358e-05	AAEL022508				GO:0005515,GO:0005524,GO:0005694,GO:0051276	protein binding,ATP binding,chromosome,chromosome organization
LOC5573203	28.1748	-2.9556	0.648117	-4.56028	5.10857e-06	5.50358e-05	AAEL002011
LOC23687644	750.774	-0.606728	0.133063	-4.55973	5.12205e-06	5.51349e-05	AAEL017224				GO:0004725,GO:0006470,GO:0008138,GO:0016301,GO:0016310,GO:0016311,GO:0016314,GO:0016787,GO:0035335	protein tyrosine phosphatase activity,protein dephosphorylation,protein tyrosine/serine/threonine phosphatase activity,kinase activity,phosphorylation,dephosphorylation,phosphatidylinositol-3,4,5-trisphosphate 3-phosphatase activity,hydrolase activity,peptidyl-tyrosine dephosphorylation
LOC5570767	340.789	-1.32342	0.290352	-4.55799	5.1646e-06	5.55465e-05	AAEL026574				GO:0003676,GO:0005634,GO:0008270,GO:0046872	nucleic acid binding,nucleus,zinc ion binding,metal ion binding
LOC110676981	340.111	-1.09017	0.239196	-4.55763	5.17335e-06	5.55941e-05	AAEL020186
LOC5575698	192.251	0.88926	0.195125	4.55738	5.17957e-06	5.56145e-05	AAEL012000
LOC5563684	28.4202	3.31782	0.728056	4.55709	5.18673e-06	5.5645e-05	AAEL000536				GO:0005515	protein binding
LOC5570295	499.304	-1.15144	0.252757	-4.55553	5.22544e-06	5.60135e-05	AAEL008232	sugar transporter [Source:VB Community Annotation]			GO:0016020,GO:0016021,GO:0022857,GO:0055085	membrane,integral component of membrane,transmembrane transporter activity,transmembrane transport
LOC5567494	405.721	0.766449	0.168309	4.55382	5.26793e-06	5.64221e-05	AAEL000941	mitochondrial inner membrane protein translocase, 8kD-subunit, putative [Source:VB Community Annotation]			GO:0005739,GO:0005743,GO:0005758,GO:0015031,GO:0046872,GO:0072321	mitochondrion,mitochondrial inner membrane,mitochondrial intermembrane space,protein transport,metal ion binding,chaperone-mediated protein transport
LOC5571882	1976.4	-0.548157	0.120399	-4.55283	5.2928e-06	5.66413e-05	AAEL012134	pur-alpha [Source:VB Community Annotation]			GO:0000977,GO:0003677,GO:0005634,GO:0032422	RNA polymerase II transcription regulatory region sequence-specific DNA binding,DNA binding,nucleus,purine-rich negative regulatory element binding
LOC5579869	158.345	-1.7501	0.384567	-4.55084	5.34318e-06	5.70935e-05	AAEL019436				GO:0005886,GO:0007608,GO:0016020,GO:0016021,GO:0050896	plasma membrane,sensory perception of smell,membrane,integral component of membrane,response to stimulus
LOC110680753	1629.15	-0.573493	0.12602	-4.55081	5.34392e-06	5.70935e-05	AAEL011751	ccar1 [Source:VB Community Annotation]			GO:0005737,GO:0006355	cytoplasm,regulation of transcription, DNA-templated
LOC5571659	39.5145	2.6468	0.581679	4.55028	5.3574e-06	5.719e-05	AAEL001652				GO:0046983	protein dimerization activity
LOC5573411	1830.99	-0.527203	0.115934	-4.54745	5.43002e-06	5.79172e-05	AAEL002048	histidyl-tRNA synthetase [Source:VB Community Annotation]			GO:0000166,GO:0004812,GO:0004821,GO:0005524,GO:0005737,GO:0006412,GO:0006418,GO:0006427,GO:0016874	nucleotide binding,aminoacyl-tRNA ligase activity,histidine-tRNA ligase activity,ATP binding,cytoplasm,translation,tRNA aminoacylation for protein translation,histidyl-tRNA aminoacylation,ligase activity
LOC5575094	321.215	-0.703548	0.154726	-4.54704	5.44044e-06	5.79803e-05	AAEL011649	DNA polymerase theta [Source:VB Community Annotation]			GO:0000166,GO:0003676,GO:0005524	nucleotide binding,nucleic acid binding,ATP binding
LOC5569029	259.205	-0.776378	0.17082	-4.54499	5.49375e-06	5.84663e-05	AAEL007321				GO:0016020,GO:0016021	membrane,integral component of membrane
LOC5577186	363.256	-0.971751	0.213809	-4.54494	5.49513e-06	5.84663e-05	AAEL013065	thiamin pyrophosphokinase [Source:VB Community Annotation]			GO:0016787	hydrolase activity
LOC5565159	1538.54	0.659758	0.145245	4.54237	5.56249e-06	5.91341e-05	AAEL004613	phenylalanyl-tRNA synthetase beta chain [Source:VB Community Annotation]			GO:0000166,GO:0000287,GO:0003723,GO:0004812,GO:0004826,GO:0005524,GO:0005737,GO:0006412,GO:0006432,GO:0016874	nucleotide binding,magnesium ion binding,RNA binding,aminoacyl-tRNA ligase activity,phenylalanine-tRNA ligase activity,ATP binding,cytoplasm,translation,phenylalanyl-tRNA aminoacylation,ligase activity
LOC5567843	1787.79	-0.520813	0.114697	-4.54076	5.60505e-06	5.95375e-05	AAEL001007				GO:0003676,GO:0003723,GO:0005515,GO:0005634,GO:0005654,GO:0005737,GO:0006406,GO:0042025,GO:0051028	nucleic acid binding,RNA binding,protein binding,nucleus,nucleoplasm,cytoplasm,mRNA export from nucleus,host cell nucleus,mRNA transport
LOC5576223	868.902	0.594051	0.130914	4.53774	5.68615e-06	6.03491e-05	AAEL002825	NADH:ubiquinone dehydrogenase, putative [Source:VB Community Annotation]			GO:0005739,GO:0008137,GO:0016020,GO:0016021,GO:0055114	mitochondrion,NADH dehydrogenase (ubiquinone) activity,membrane,integral component of membrane,oxidation-reduction process
LOC5565953	1133.98	-0.814793	0.179603	-4.53662	5.71619e-06	6.06179e-05	AAEL005071	GTP binding protein [Source:UniProtKB/TrEMBL;Acc:A0A1S4F9G8]			GO:0000166,GO:0003924,GO:0005525	nucleotide binding,GTPase activity,GTP binding
LOC5568406	212.476	1.36471	0.300907	4.53531	5.75178e-06	6.09452e-05	AAEL006823	AMP dependent ligase [Source:VB Community Annotation]			GO:0003824	catalytic activity
LOC5574692	1265.28	-1.11677	0.246268	-4.53477	5.76676e-06	6.10244e-05	AAEL011329				GO:0006974,GO:0008283	cellular response to DNA damage stimulus,cell population proliferation
LOC110680396	53.8334	-1.67221	0.36876	-4.53469	5.76873e-06	6.10244e-05	AAEL023108
LOC5569893	676.945	-0.813386	0.179389	-4.53419	5.78247e-06	6.11195e-05	AAEL007996	centaurin alpha [Source:VB Community Annotation]			GO:0005096,GO:0043547,GO:0046872,GO:1902936	GTPase activator activity,positive regulation of GTPase activity,metal ion binding,phosphatidylinositol bisphosphate binding
LOC5570361	15.411	3.24679	0.716281	4.53284	5.81964e-06	6.14618e-05	AAEL026740
LOC5571418	507.337	0.607163	0.133955	4.53261	5.82599e-06	6.14786e-05	AAEL009059	arp2/3 complex 16 kd subunit (P16-arc) [Source:VB Community Annotation]			GO:0005737,GO:0005856,GO:0005885,GO:0015629,GO:0030833,GO:0034314	cytoplasm,cytoskeleton,Arp2/3 protein complex,actin cytoskeleton,regulation of actin filament polymerization,Arp2/3 complex-mediated actin nucleation
LOC5573537	90.6325	-2.93246	0.647117	-4.53159	5.85424e-06	6.1726e-05	AAEL010596	n-acetylgalactosaminyltransferase [Source:VB Community Annotation]			GO:0000139,GO:0005794,GO:0006486,GO:0016020,GO:0016021,GO:0016740,GO:0016757,GO:0030246	Golgi membrane,Golgi apparatus,protein glycosylation,membrane,integral component of membrane,transferase activity,transferase activity, transferring glycosyl groups,carbohydrate binding
LOC5579894	567.794	-1.07649	0.23771	-4.52861	5.9373e-06	6.25505e-05	AAEL001039	metaxin [Source:VB Community Annotation]			GO:0001401,GO:0005739,GO:0005741,GO:0015031,GO:0016020,GO:0016021	SAM complex,mitochondrion,mitochondrial outer membrane,protein transport,membrane,integral component of membrane
LOC5564353	2809.86	-0.44715	0.0987654	-4.5274	5.97141e-06	6.28584e-05	AAEL004221	glycogen synthase [Source:VB Community Annotation]			GO:0004373,GO:0005978,GO:0016740,GO:0016757	glycogen (starch) synthase activity,glycogen biosynthetic process,transferase activity,transferase activity, transferring glycosyl groups
LOC5568689	420.257	-0.884654	0.195432	-4.52665	5.99268e-06	6.30309e-05	AAEL007053
LOC5565811	23.3509	6.29726	1.39148	4.52558	6.02311e-06	6.32992e-05	AAEL014981
LOC5577130	56.0003	-3.17921	0.703115	-4.5216	6.13738e-06	6.44475e-05	AAEL013026	guanylate cyclase [Source:VB Community Annotation]			GO:0000166,GO:0004383,GO:0005525,GO:0005737,GO:0006182,GO:0009190,GO:0016829,GO:0016849,GO:0020037,GO:0035556	nucleotide binding,guanylate cyclase activity,GTP binding,cytoplasm,cGMP biosynthetic process,cyclic nucleotide biosynthetic process,lyase activity,phosphorus-oxygen lyase activity,heme binding,intracellular signal transduction
LOC5570881	1346.02	-0.888121	0.196652	-4.51621	6.29562e-06	6.60552e-05	AAEL008662	mixed-lineage leukemia protein [Source:VB Community Annotation]			GO:0005634,GO:0046872	nucleus,metal ion binding
LOC5580008	342.178	0.773615	0.17131	4.51587	6.3058e-06	6.61081e-05	AAEL009642	cathepsin b [Source:VB Community Annotation]			GO:0004197,GO:0006508,GO:0008234,GO:0016787	cysteine-type endopeptidase activity,proteolysis,cysteine-type peptidase activity,hydrolase activity
LOC5576043	575.382	-0.651345	0.144344	-4.51243	6.40881e-06	6.71335e-05	AAEL012278	metalloprotease [Source:VB Community Annotation]			GO:0003824,GO:0006508,GO:0046872	catalytic activity,proteolysis,metal ion binding
LOC5567254	1024.93	-0.796589	0.176637	-4.50974	6.49058e-06	6.79347e-05	AAEL025460				GO:0000166,GO:0005524,GO:0016020,GO:0016021,GO:0016887,GO:0042626,GO:0055085	nucleotide binding,ATP binding,membrane,integral component of membrane,ATPase activity,ATPase-coupled transmembrane transporter activity,transmembrane transport
LOC5577359	869.763	-0.657876	0.145893	-4.50931	6.504e-06	6.80199e-05	AAEL026240				GO:0016020,GO:0016021,GO:0016746	membrane,integral component of membrane,transferase activity, transferring acyl groups
LOC5576283	2624.46	-0.712738	0.158107	-4.50794	6.54589e-06	6.84024e-05	AAEL012446	Inhibitor of Apoptosis (IAP) containing Baculoviral IAP Repeat(s) (BIR domains). [Source:VB Community Annotation]	IAP6		GO:0004842,GO:0006915,GO:0016567,GO:0032465	ubiquitin-protein transferase activity,apoptotic process,protein ubiquitination,regulation of cytokinesis
LOC5576921	32.0474	2.62882	0.583271	4.50702	6.57441e-06	6.86448e-05	AAEL012859
LOC5576856	153.992	-2.12225	0.470971	-4.50612	6.60228e-06	6.88799e-05	AAEL020057				GO:0016020,GO:0016021	membrane,integral component of membrane
LOC5565160	2321.8	-0.973886	0.216278	-4.50293	6.70244e-06	6.98682e-05	AAEL023895				GO:0003676,GO:0003723,GO:0005515	nucleic acid binding,RNA binding,protein binding
LOC5566636	944.866	-0.616091	0.13684	-4.50228	6.72283e-06	7.0024e-05	AAEL005510	WD-repeat protein [Source:VB Community Annotation]			GO:0005515	protein binding
LOC110681391	27.9571	2.66587	0.592281	4.50103	6.76257e-06	7.03494e-05	AAEL025370
LOC5565167	215.545	0.945381	0.21004	4.50095	6.76499e-06	7.03494e-05	AAEL004608
LOC5566859	557.823	-1.00102	0.22249	-4.49915	6.8225e-06	7.08901e-05	AAEL000822	kinesin-like protein KLP68D [Source:VB Community Annotation]			GO:0000166,GO:0003774,GO:0003777,GO:0005524,GO:0005874,GO:0007018,GO:0008017	nucleotide binding,motor activity,microtubule motor activity,ATP binding,microtubule,microtubule-based movement,microtubule binding
LOC5580104	441.309	-1.07883	0.239857	-4.4978	6.86615e-06	7.12862e-05	AAEL020617				GO:0000184,GO:0004674,GO:0005515,GO:0006468,GO:0016301,GO:0016310,GO:0016740	nuclear-transcribed mRNA catabolic process, nonsense-mediated decay,protein serine/threonine kinase activity,protein binding,protein phosphorylation,kinase activity,phosphorylation,transferase activity
LOC5564524	7284.1	-0.565441	0.125739	-4.49695	6.89336e-06	7.1511e-05	AAEL024141				GO:0003714,GO:0005634,GO:0006355,GO:0016580,GO:1903507	transcription corepressor activity,nucleus,regulation of transcription, DNA-templated,Sin3 complex,negative regulation of nucleic acid-templated transcription
LOC5578546	261.768	-0.943423	0.20981	-4.49655	6.90654e-06	7.159e-05	AAEL003569	acyl-coa thioesterase [Source:VB Community Annotation]
LOC5565779	279.72	-1.0817	0.240693	-4.4941	6.98664e-06	7.2362e-05	AAEL004995	Caspase-activated nuclease, putative [Source:UniProtKB/TrEMBL;Acc:A0A1S4F990]			GO:0004536,GO:0005634,GO:0005737,GO:0006309,GO:0006915,GO:0016787	deoxyribonuclease activity,nucleus,cytoplasm,apoptotic DNA fragmentation,apoptotic process,hydrolase activity
LOC110681537	140.248	1.30827	0.291158	4.49335	7.01105e-06	7.25565e-05	AAEL021513
LOC5574373	416.796	-0.732129	0.162978	-4.49219	7.04929e-06	7.28937e-05	AAEL011103	centromere/kinetochore protein zw10 [Source:VB Community Annotation]			GO:0000278,GO:0000775,GO:0000776,GO:0000777,GO:0005634,GO:0005694,GO:0005737,GO:0007049,GO:0051301	mitotic cell cycle,chromosome, centromeric region,kinetochore,condensed chromosome kinetochore,nucleus,chromosome,cytoplasm,cell cycle,cell division
LOC5566398	665.128	0.595461	0.132601	4.49064	7.10109e-06	7.33703e-05	AAEL005355	small nuclear ribonucleoprotein sm [Source:VB Community Annotation]			GO:0000398,GO:0000956,GO:0003723,GO:0005634,GO:0005681,GO:0006396,GO:0006397,GO:0008380	mRNA splicing, via spliceosome,nuclear-transcribed mRNA catabolic process,RNA binding,nucleus,spliceosomal complex,RNA processing,mRNA processing,RNA splicing
LOC5572613	507.317	-0.733498	0.163542	-4.48508	7.2888e-06	7.52494e-05	AAEL009919	zinc finger protein [Source:VB Community Annotation]			GO:0003676	nucleic acid binding
LOC5567424	769.272	0.588702	0.131275	4.48448	7.3092e-06	7.53996e-05	AAEL006065	s-adenosyl-methyltransferase mraw [Source:VB Community Annotation]			GO:0008168,GO:0016740,GO:0032259	methyltransferase activity,transferase activity,methylation
LOC5569464	451.688	-0.861366	0.192128	-4.4833	7.3499e-06	7.57587e-05	AAEL007661	rab-40 [Source:VB Community Annotation]			GO:0003924,GO:0005525,GO:0035556	GTPase activity,GTP binding,intracellular signal transduction
LOC5570015	184.289	-1.17972	0.263178	-4.48258	7.37469e-06	7.59534e-05	AAEL000211				GO:0005515	protein binding
LOC5579854	624.531	-0.831252	0.18546	-4.48211	7.39076e-06	7.60581e-05	AAEL005856	signal recognition particle receptor alpha subunit (sr-alpha) [Source:VB Community Annotation]			GO:0000166,GO:0003924,GO:0005047,GO:0005525,GO:0005785,GO:0006614,GO:0006886	nucleotide binding,GTPase activity,signal recognition particle binding,GTP binding,signal recognition particle receptor complex,SRP-dependent cotranslational protein targeting to membrane,intracellular protein transport
LOC5566562	805.844	-0.977441	0.218091	-4.48181	7.40131e-06	7.61058e-05	AAEL019531				GO:0000166,GO:0000287,GO:0005524,GO:0015914,GO:0016020,GO:0016021,GO:0034204,GO:0140326	nucleotide binding,magnesium ion binding,ATP binding,phospholipid transport,membrane,integral component of membrane,lipid translocation,ATPase-coupled intramembrane lipid transporter activity
LOC5575983	8149.05	-0.504527	0.112649	-4.47874	7.50865e-06	7.71479e-05	AAEL012233				GO:0003700,GO:0006355,GO:0046983	DNA-binding transcription factor activity,regulation of transcription, DNA-templated,protein dimerization activity
LOC5570447	17.9184	2.88087	0.643392	4.47763	7.54777e-06	7.7488e-05	AAEL008350				GO:0003677,GO:0003700,GO:0006357,GO:0046983	DNA binding,DNA-binding transcription factor activity,regulation of transcription by RNA polymerase II,protein dimerization activity
LOC5563695	42.4391	2.69585	0.60234	4.47563	7.61874e-06	7.81543e-05	AAEL000549	fibulin 1 and [Source:VB Community Annotation]			GO:0005509,GO:0005515,GO:0016504,GO:0030198,GO:0062023	calcium ion binding,protein binding,peptidase activator activity,extracellular matrix organization,collagen-containing extracellular matrix
LOC5569162	1910.16	-0.467977	0.104571	-4.47519	7.6345e-06	7.82536e-05	AAEL007422	cp27, putative [Source:VB Community Annotation]
LOC5575296	12389.3	0.435056	0.0972247	4.47475	7.65025e-06	7.83527e-05	AAEL025082	Peptidyl-prolyl cis-trans isomerase [Source:UniProtKB/TrEMBL;Acc:Q16P59]			GO:0000413,GO:0003755,GO:0006457,GO:0016853	protein peptidyl-prolyl isomerization,peptidyl-prolyl cis-trans isomerase activity,protein folding,isomerase activity
LOC5578503	195.752	0.864227	0.193192	4.4734	7.69856e-06	7.87847e-05	AAEL019998				GO:0003747,GO:0006415	translation release factor activity,translational termination
LOC5580311	2932.57	-0.703345	0.15731	-4.47108	7.78245e-06	7.95801e-05	AAEL003014				GO:0003676	nucleic acid binding
LOC5575107	1463.19	-0.655777	0.146682	-4.47074	7.79503e-06	7.96454e-05	AAEL011664				GO:0003676	nucleic acid binding
LOC5569144	3782.41	0.589291	0.131832	4.47003	7.82075e-06	7.98448e-05	AAEL007392	mitochondrial import receptor subunit tom20 [Source:VB Community Annotation]			GO:0005739,GO:0005741,GO:0005742,GO:0006605,GO:0006886,GO:0016020,GO:0016021	mitochondrion,mitochondrial outer membrane,mitochondrial outer membrane translocase complex,protein targeting,intracellular protein transport,membrane,integral component of membrane
LOC5580046	1114.63	-0.742513	0.166125	-4.4696	7.83656e-06	7.99429e-05	AAEL010226	daughterless [Source:VB Community Annotation]	da		GO:0046983	protein dimerization activity
LOC5569007	212.875	1.32649	0.296892	4.46791	7.89874e-06	8.0473e-05	AAEL007296	Fatty acyl-CoA reductase [Source:UniProtKB/TrEMBL;Acc:Q172R4]			GO:0006629,GO:0016020,GO:0016021,GO:0016491,GO:0055114,GO:0080019,GO:0102965	lipid metabolic process,membrane,integral component of membrane,oxidoreductase activity,oxidation-reduction process,fatty-acyl-CoA reductase (alcohol-forming) activity,alcohol-forming fatty acyl-CoA reductase activity
LOC5576477	2762.34	1.17578	0.263165	4.46785	7.90103e-06	8.0473e-05	AAEL002887	Armadillo segment polarity protein [Source:UniProtKB/Swiss-Prot;Acc:Q17GS9]	arm		GO:0005515,GO:0005737,GO:0005886,GO:0005912,GO:0007155,GO:0007275,GO:0007367,GO:0008134,GO:0014017,GO:0016020,GO:0016055,GO:0030054,GO:0045296,GO:0060070	protein binding,cytoplasm,plasma membrane,adherens junction,cell adhesion,multicellular organism development,segment polarity determination,transcription factor binding,neuroblast fate commitment,membrane,Wnt signaling pathway,cell junction,cadherin binding,canonical Wnt signaling pathway
LOC5566313	302.252	-1.6102	0.360626	-4.46502	8.00615e-06	8.14792e-05	AAEL024012				GO:0006629,GO:0016020,GO:0016021,GO:0016491,GO:0055114,GO:0080019,GO:0102965	lipid metabolic process,membrane,integral component of membrane,oxidoreductase activity,oxidation-reduction process,fatty-acyl-CoA reductase (alcohol-forming) activity,alcohol-forming fatty acyl-CoA reductase activity
LOC5574032	2944.92	-0.478029	0.107121	-4.46251	8.10059e-06	8.23752e-05	AAEL010877				GO:0005515	protein binding
LOC110680828	199.155	-0.875356	0.196188	-4.46181	8.12691e-06	8.25377e-05	AAEL027008
LOC5578652	75.716	2.70503	0.606272	4.46175	8.1294e-06	8.25377e-05	AAEL013802	Fatty acyl-CoA reductase [Source:UniProtKB/TrEMBL;Acc:A0A1S4FZZ5]			GO:0006629,GO:0016020,GO:0016021,GO:0016491,GO:0055114,GO:0080019,GO:0102965	lipid metabolic process,membrane,integral component of membrane,oxidoreductase activity,oxidation-reduction process,fatty-acyl-CoA reductase (alcohol-forming) activity,alcohol-forming fatty acyl-CoA reductase activity
LOC5571664	1871.24	0.541653	0.12142	4.461	8.15778e-06	8.27606e-05	AAEL024228				GO:0000015,GO:0000287,GO:0004634,GO:0006096,GO:0016829	phosphopyruvate hydratase complex,magnesium ion binding,phosphopyruvate hydratase activity,glycolytic process,lyase activity
LOC5570607	90.9137	1.7538	0.39322	4.46011	8.1918e-06	8.30403e-05	AAEL008421	cadherin [Source:VB Community Annotation]			GO:0005509,GO:0005886,GO:0007155,GO:0007156,GO:0016020	calcium ion binding,plasma membrane,cell adhesion,homophilic cell adhesion via plasma membrane adhesion molecules,membrane
LOC5565121	1018.77	-0.569137	0.127627	-4.45939	8.21931e-06	8.32537e-05	AAEL014732				GO:0005515,GO:0006986,GO:0016020,GO:0016021	protein binding,response to unfolded protein,membrane,integral component of membrane
LOC5564980	148.108	-1.19744	0.268677	-4.45681	8.31884e-06	8.41956e-05	AAEL004519				GO:0003676,GO:0005634,GO:0008270,GO:0046872	nucleic acid binding,nucleus,zinc ion binding,metal ion binding
LOC5564265	1136.72	-1.76696	0.396616	-4.45508	8.3861e-06	8.48096e-05	AAEL027694				GO:0004252,GO:0005044,GO:0005515,GO:0006508,GO:0006897,GO:0016020,GO:0016021	serine-type endopeptidase activity,scavenger receptor activity,protein binding,proteolysis,endocytosis,membrane,integral component of membrane
LOC5579958	4863.66	0.924866	0.207619	4.45464	8.40354e-06	8.49192e-05	AAEL007584
LOC110677198	133.463	2.05275	0.461289	4.45003	8.58578e-06	8.66928e-05	AAEL023713				GO:0005515	protein binding
LOC5575646	43.1398	-1.93067	0.433883	-4.44976	8.59654e-06	8.67334e-05	AAEL011986				GO:0005783,GO:0005789,GO:0006629,GO:0016020,GO:0016021	endoplasmic reticulum,endoplasmic reticulum membrane,lipid metabolic process,membrane,integral component of membrane
LOC5575831	20.8661	2.4775	0.556945	4.44838	8.65221e-06	8.72267e-05	AAEL012099	protease m1 zinc metalloprotease [Source:VB Community Annotation]			GO:0004177,GO:0006508,GO:0008233,GO:0008237,GO:0008270,GO:0016787,GO:0046872	aminopeptidase activity,proteolysis,peptidase activity,metallopeptidase activity,zinc ion binding,hydrolase activity,metal ion binding
LOC5573486	28.8509	4.49301	1.01078	4.4451	8.78525e-06	8.84987e-05	AAEL026094
LOC5564048	657.79	-0.738943	0.166259	-4.44452	8.80898e-06	8.86683e-05	AAEL024655
LOC5566769	380.896	-0.869125	0.195644	-4.44238	8.89702e-06	8.94846e-05	AAEL019735				GO:0005515,GO:0016740	protein binding,transferase activity
LOC5568681	28.0926	2.68096	0.603567	4.44187	8.91822e-06	8.96277e-05	AAEL007033	pyrroline-5-carboxylate reductase [Source:VB Community Annotation]			GO:0004735,GO:0006561,GO:0008652,GO:0016491,GO:0055114,GO:0055129	pyrroline-5-carboxylate reductase activity,proline biosynthetic process,cellular amino acid biosynthetic process,oxidoreductase activity,oxidation-reduction process,L-proline biosynthetic process
LOC5574167	7384.99	0.418278	0.0941867	4.44095	8.95634e-06	8.99407e-05	AAEL010977	ATP-dependent transporter [Source:VB Community Annotation]			GO:0000166,GO:0005524,GO:0016887	nucleotide binding,ATP binding,ATPase activity
LOC5577094	3330.41	0.563621	0.126942	4.43999	8.9965e-06	9.02735e-05	AAEL012996	rho guanine dissociation factor [Source:VB Community Annotation]			GO:0005094,GO:0005737,GO:0050790	Rho GDP-dissociation inhibitor activity,cytoplasm,regulation of catalytic activity
LOC5575223	2510.86	-0.636957	0.143475	-4.43951	9.01649e-06	9.04037e-05	AAEL010608	succinate dehydrogenase [Source:VB Community Annotation]			GO:0005743,GO:0006099,GO:0008177,GO:0016020,GO:0016491,GO:0016627,GO:0022900,GO:0050660,GO:0055114	mitochondrial inner membrane,tricarboxylic acid cycle,succinate dehydrogenase (ubiquinone) activity,membrane,oxidoreductase activity,oxidoreductase activity, acting on the CH-CH group of donors,electron transport chain,flavin adenine dinucleotide binding,oxidation-reduction process
LOC5574088	752.513	-0.880779	0.19842	-4.43895	9.03974e-06	9.05663e-05	AAEL002250	terminal deoxycytidyl transferase rev1 [Source:VB Community Annotation]			GO:0003684,GO:0006281,GO:0016779,GO:0042276	damaged DNA binding,DNA repair,nucleotidyltransferase activity,error-prone translesion synthesis
LOC5574530	676.372	-0.786887	0.177357	-4.43675	9.13282e-06	9.14276e-05	AAEL011196				GO:0005515	protein binding
LOC5576633	998.402	-0.68096	0.153521	-4.4356	9.18157e-06	9.18442e-05	AAEL012659	protein serine/threonine kinase, putative [Source:VB Community Annotation]			GO:0004672,GO:0005524,GO:0006468	protein kinase activity,ATP binding,protein phosphorylation
LOC5565542	92.9851	1.14876	0.259165	4.43254	9.31277e-06	9.30843e-05	AAEL004833	diptericin anti-microbial peptide [Source:VB Community Annotation]	DPT1		GO:0005576,GO:0042742,GO:0045087	extracellular region,defense response to bacterium,innate immune response
LOC110679478	69.4811	-1.85122	0.417876	-4.43008	9.41991e-06	9.40822e-05	AAEL027452
LOC5577602	19.5542	4.33249	0.978124	4.42939	9.44995e-06	9.43091e-05	AAEL003226	pupal cuticle protein 78E, putative [Source:VB Community Annotation]			GO:0042302	structural constituent of cuticle
LOC110674836	1027.11	-4.1566	0.938527	-4.42885	9.47348e-06	9.44706e-05	AAEL020033				GO:0003676	nucleic acid binding
LOC5575492	3801.52	0.524048	0.118334	4.42855	9.48702e-06	9.45325e-05	AAEL011871	cytochrome C1 [Source:VB Community Annotation]			GO:0005743,GO:0009055,GO:0016020,GO:0016021,GO:0020037,GO:0022900,GO:0046872	mitochondrial inner membrane,electron transfer activity,membrane,integral component of membrane,heme binding,electron transport chain,metal ion binding
LOC5577344	275.246	-1.02534	0.231551	-4.42812	9.50593e-06	9.46476e-05	AAEL000425				GO:0004518,GO:0004519,GO:0006281,GO:0006974,GO:0016020,GO:0016021,GO:0016787,GO:0090305	nuclease activity,endonuclease activity,DNA repair,cellular response to DNA damage stimulus,membrane,integral component of membrane,hydrolase activity,nucleic acid phosphodiester bond hydrolysis
LOC5575654	790.294	-0.585983	0.132386	-4.42633	9.5852e-06	9.53631e-05	AAEL011973	fumarylacetoacetate hydrolase [Source:VB Community Annotation]			GO:0003824,GO:0004334,GO:0005829,GO:0006559,GO:0006572,GO:0009072,GO:0016787,GO:0046872,GO:1902000	catalytic activity,fumarylacetoacetase activity,cytosol,L-phenylalanine catabolic process,tyrosine catabolic process,aromatic amino acid family metabolic process,hydrolase activity,metal ion binding,homogentisate catabolic process
LOC23687966	1544.09	-0.584137	0.132063	-4.42319	9.72556e-06	9.66848e-05	AAEL019801				GO:0004672,GO:0004674,GO:0005524,GO:0006468,GO:0016301,GO:0016310	protein kinase activity,protein serine/threonine kinase activity,ATP binding,protein phosphorylation,kinase activity,phosphorylation
LOC110677150	99.1428	-2.25807	0.510633	-4.4221	9.77444e-06	9.70958e-05	AAEL023233
LOC5565136	19.4541	2.96662	0.671048	4.42089	9.82969e-06	9.75693e-05	AAEL004648				GO:0046983	protein dimerization activity
LOC110680787	187.905	-0.825165	0.186721	-4.41923	9.90539e-06	9.82117e-05	AAEL022441
LOC5579827	34.69	1.97582	0.447111	4.41908	9.91238e-06	9.82117e-05	AAEL005518				GO:0003677,GO:0005634	DNA binding,nucleus
LOC5572086	182.418	-0.950332	0.215057	-4.41897	9.9173e-06	9.82117e-05	AAEL009499				GO:0003676,GO:0003700,GO:0005634,GO:0008270,GO:0046872	nucleic acid binding,DNA-binding transcription factor activity,nucleus,zinc ion binding,metal ion binding
LOC5575951	558.986	0.824571	0.186607	4.41876	9.9267e-06	9.82293e-05	AAEL000348
LOC5577296	19.2009	-3.47778	0.787547	-4.41597	1.00557e-05	9.94289e-05	AAEL013148
LOC5570428	289.754	-1.31618	0.298232	-4.41327	1.01821e-05	0.000100602	AAEL008331
LOC5575359	21.879	4.35091	0.986177	4.4119	1.02469e-05	0.000101164	AAEL011764	prophenoloxidase [Source:VB Community Annotation]	PPO10		GO:0004497,GO:0016491,GO:0046872,GO:0055114	monooxygenase activity,oxidoreductase activity,metal ion binding,oxidation-reduction process
LOC5572230	1216.04	-0.671888	0.152339	-4.41049	1.03138e-05	0.000101747	AAEL009678	golgi-specific brefeldin a-resistance factor [Source:VB Community Annotation]			GO:0005086,GO:0032012	ARF guanyl-nucleotide exchange factor activity,regulation of ARF protein signal transduction
LOC5578801	907.67	-1.38222	0.313428	-4.41001	1.03367e-05	0.000101895	AAEL003646				GO:0003700,GO:0006355	DNA-binding transcription factor activity,regulation of transcription, DNA-templated
LOC5563966	414.836	-0.716898	0.162738	-4.40524	1.05666e-05	0.000104082	AAEL004025	glucose dehydrogenase [Source:VB Community Annotation]			GO:0016614,GO:0050660,GO:0055114	oxidoreductase activity, acting on CH-OH group of donors,flavin adenine dinucleotide binding,oxidation-reduction process
LOC5567896	672.885	-0.738059	0.16764	-4.40265	1.06935e-05	0.00010525	AAEL006354	epoxide hydrolase [Source:VB Community Annotation]			GO:0003824,GO:0016020,GO:0016021	catalytic activity,membrane,integral component of membrane
LOC5568588	114.88	1.34568	0.305801	4.40051	1.07996e-05	0.000106214	AAEL001100	phosphoserine phosphatase [Source:VB Community Annotation]			GO:0004647,GO:0006564,GO:0016311	phosphoserine phosphatase activity,L-serine biosynthetic process,dephosphorylation
LOC5567781	39.5941	2.91513	0.662563	4.39977	1.08365e-05	0.000106496	AAEL000119	AMP dependent coa ligase [Source:VB Community Annotation]			GO:0003824	catalytic activity
LOC5569543	26.353	2.19782	0.499915	4.39639	1.10066e-05	0.000108084	AAEL007720				GO:0018095	protein polyglutamylation
LOC5569017	51.5043	1.96359	0.446669	4.39607	1.10228e-05	0.000108157	AAEL007303				GO:0002039,GO:0018024,GO:0034968	p53 binding,histone-lysine N-methyltransferase activity,histone lysine methylation
LOC110674881	27.5593	2.20107	0.500727	4.39575	1.10391e-05	0.000108157	AAEL021234
LOC110677819	27.5593	2.20107	0.500727	4.39575	1.10391e-05	0.000108157	AAEL026254
LOC5572046	128.324	1.71245	0.389853	4.39256	1.12024e-05	0.000109673	AAEL000227	Class B Scavenger Receptor (CD36 domain). [Source:VB Community Annotation]	SCRB8		GO:0005886,GO:0016020,GO:0016021	plasma membrane,membrane,integral component of membrane
LOC5569157	1299.44	-0.723605	0.164742	-4.39234	1.12138e-05	0.000109701	AAEL022180				GO:0005515	protein binding
LOC5580285	397.326	-0.740406	0.168602	-4.39145	1.12599e-05	0.000110068	AAEL003004				GO:0005634,GO:0008270,GO:0046872	nucleus,zinc ion binding,metal ion binding
LOC5573968	3001.87	0.570465	0.129917	4.39099	1.12837e-05	0.000110217	AAEL010823	ATP synthase delta chain [Source:VB Community Annotation]			GO:0005743,GO:0006754,GO:0006811,GO:0015986,GO:0016020,GO:0046933	mitochondrial inner membrane,ATP biosynthetic process,ion transport,ATP synthesis coupled proton transport,membrane,proton-transporting ATP synthase activity, rotational mechanism
LOC110677839	29.0531	3.07021	0.699303	4.39039	1.13149e-05	0.000110439	AAEL026461
LOC110679616	869.085	0.486678	0.110862	4.38997	1.13368e-05	0.000110568	AAEL027646
LOC5569115	32.6813	-2.75642	0.628236	-4.38755	1.14634e-05	0.000111719	AAEL007373	ammonium transporter [Source:VB Community Annotation]			GO:0008519,GO:0015696,GO:0016020,GO:0016021,GO:0072488	ammonium transmembrane transporter activity,ammonium transport,membrane,integral component of membrane,ammonium transmembrane transport
LOC5567206	59.7425	2.0759	0.473209	4.38686	1.15e-05	0.00011195	AAEL021128				GO:0016787,GO:0052689	hydrolase activity,carboxylic ester hydrolase activity
LOC110679129	19.3736	4.09386	0.933263	4.38661	1.15133e-05	0.00011195	AAEL021972
LOC110679475	19.3736	4.09386	0.933263	4.38661	1.15133e-05	0.00011195	AAEL020947
LOC5578405	1239.85	-0.862488	0.196645	-4.38601	1.15447e-05	0.000112171	AAEL013692	PIWI [Source:VB Community Annotation]	PIWI3		GO:0003676,GO:0005515,GO:0031047	nucleic acid binding,protein binding,gene silencing by RNA
LOC5577804	163.82	0.933647	0.212932	4.38472	1.16133e-05	0.000112752	AAEL011592	secreted mucin MUC17, putative [Source:VB Community Annotation]			GO:0000166,GO:0003924,GO:0005525,GO:0007165,GO:0016020	nucleotide binding,GTPase activity,GTP binding,signal transduction,membrane
LOC5578606	1479.06	-0.78628	0.179516	-4.38	1.18679e-05	0.000115137	AAEL003594	kinectin, putative [Source:VB Community Annotation]			GO:0000166,GO:0003774,GO:0003777,GO:0005524,GO:0005874,GO:0007018,GO:0008017	nucleotide binding,motor activity,microtubule motor activity,ATP binding,microtubule,microtubule-based movement,microtubule binding
LOC5578056	208.572	-1.29604	0.295967	-4.37901	1.19219e-05	0.000115574	AAEL013488	glucose inhibited division protein a [Source:VB Community Annotation]			GO:0002098,GO:0008033,GO:0050660	tRNA wobble uridine modification,tRNA processing,flavin adenine dinucleotide binding
LOC5568519	16.8929	2.97351	0.679105	4.37858	1.19457e-05	0.000115668	AAEL019530				GO:0005576,GO:0008061	extracellular region,chitin binding
LOC5564642	148.068	2.0954	0.478565	4.37851	1.19495e-05	0.000115668	AAEL004361	alpha-glucosidase [Source:VB Community Annotation]			GO:0004553,GO:0005975,GO:0008152,GO:0016787,GO:0016798	hydrolase activity, hydrolyzing O-glycosyl compounds,carbohydrate metabolic process,metabolic process,hydrolase activity,hydrolase activity, acting on glycosyl bonds
LOC5571202	2394.72	-0.565526	0.129238	-4.37586	1.20957e-05	0.000116995	AAEL008902	cation-transporting ATPase fly [Source:VB Community Annotation]			GO:0000166,GO:0005524,GO:0006812,GO:0016020,GO:0016021,GO:0016887,GO:0046872	nucleotide binding,ATP binding,cation transport,membrane,integral component of membrane,ATPase activity,metal ion binding
LOC110674823	182.069	0.969733	0.221844	4.37124	1.23541e-05	0.000119404	AAEL021179				GO:0006144,GO:0033971	purine nucleobase metabolic process,hydroxyisourate hydrolase activity
LOC5577436	366.595	-0.702265	0.160726	-4.36933	1.2463e-05	0.000120366	AAEL013182	ATP-dependent RNA helicase [Source:VB Community Annotation]			GO:0000166,GO:0003676,GO:0003724,GO:0004386,GO:0005515,GO:0005524,GO:0046872	nucleotide binding,nucleic acid binding,RNA helicase activity,helicase activity,protein binding,ATP binding,metal ion binding
LOC5571414	1002.22	0.540697	0.123758	4.369	1.24818e-05	0.000120457	AAEL009041	arp2/3 complex 20 kd subunit [Source:VB Community Annotation]			GO:0003779,GO:0005737,GO:0005856,GO:0005885,GO:0015629,GO:0030041,GO:0030833,GO:0034314	actin binding,cytoplasm,cytoskeleton,Arp2/3 protein complex,actin cytoskeleton,actin filament polymerization,regulation of actin filament polymerization,Arp2/3 complex-mediated actin nucleation
LOC5577347	117.896	2.24569	0.514176	4.36754	1.25654e-05	0.000121174	AAEL000438	epoxide hydrolase [Source:VB Community Annotation]			GO:0003824,GO:0016020,GO:0016021	catalytic activity,membrane,integral component of membrane
LOC5573038	468.331	1.03386	0.236738	4.36709	1.25913e-05	0.000121332	AAEL025993				GO:0000166,GO:0003824,GO:0005737,GO:0016491,GO:0016627,GO:0017113,GO:0019483,GO:0046872,GO:0051536,GO:0051539,GO:0055114	nucleotide binding,catalytic activity,cytoplasm,oxidoreductase activity,oxidoreductase activity, acting on the CH-CH group of donors,dihydropyrimidine dehydrogenase (NADP+) activity,beta-alanine biosynthetic process,metal ion binding,iron-sulfur cluster binding,4 iron, 4 sulfur cluster binding,oxidation-reduction process
LOC5571642	1367.16	0.546297	0.125113	4.36642	1.26301e-05	0.000121602	AAEL001649	leucine aminopeptidase [Source:VB Community Annotation]			GO:0004177,GO:0005737,GO:0006508,GO:0008233,GO:0008235,GO:0016787,GO:0019538,GO:0030145,GO:0070006	aminopeptidase activity,cytoplasm,proteolysis,peptidase activity,metalloexopeptidase activity,hydrolase activity,protein metabolic process,manganese ion binding,metalloaminopeptidase activity
LOC5566116	1232.15	-0.543877	0.124563	-4.36628	1.26381e-05	0.000121602	AAEL005174
LOC5580187	3470.58	-0.640313	0.146701	-4.36474	1.27276e-05	0.000122335	AAEL002554	anosmin, putative [Source:VB Community Annotation]			GO:0005515,GO:0005576,GO:0010466,GO:0030414	protein binding,extracellular region,negative regulation of peptidase activity,peptidase inhibitor activity
LOC5574979	424.299	-0.849891	0.194722	-4.36464	1.27334e-05	0.000122335	AAEL002514				GO:0003676,GO:0005634,GO:0008270,GO:0046872	nucleic acid binding,nucleus,zinc ion binding,metal ion binding
LOC5578293	4696.99	-0.705968	0.161955	-4.35903	1.30642e-05	0.00012542	AAEL022819				GO:0005198,GO:0005515,GO:0005905,GO:0006886,GO:0016020,GO:0016192,GO:0030130,GO:0030132,GO:0030659,GO:0031410,GO:0032051,GO:0071439	structural molecule activity,protein binding,clathrin-coated pit,intracellular protein transport,membrane,vesicle-mediated transport,clathrin coat of trans-Golgi network vesicle,clathrin coat of coated pit,cytoplasmic vesicle membrane,cytoplasmic vesicle,clathrin light chain binding,clathrin complex
LOC110675918	410.705	-0.705371	0.161861	-4.35788	1.31327e-05	0.000125984	AAEL025164
LOC5568436	4488.12	0.54174	0.124335	4.35709	1.31802e-05	0.000126345	AAEL012661	Eukaryotic translation initiation factor 3 subunit G (eIF3g)(Eukaryotic translation initiation factor 3 subunit 4)(Eukaryotic translation initiation factor 3 RNA-binding subunit)(eIF-3 RNA-binding subunit) [Source:VB Community Annotation]	eIF3-S4-2		GO:0001732,GO:0002183,GO:0003676,GO:0003723,GO:0003743,GO:0005737,GO:0005852,GO:0006412,GO:0006413,GO:0016282,GO:0033290	formation of cytoplasmic translation initiation complex,cytoplasmic translational initiation,nucleic acid binding,RNA binding,translation initiation factor activity,cytoplasm,eukaryotic translation initiation factor 3 complex,translation,translational initiation,eukaryotic 43S preinitiation complex,eukaryotic 48S preinitiation complex
LOC5571899	439.014	-0.75404	0.173081	-4.35656	1.32121e-05	0.000126557	AAEL009383	crooked neck protein [Source:VB Community Annotation]			GO:0005515,GO:0006396	protein binding,RNA processing
LOC5580175	79.7269	2.40823	0.552929	4.3554	1.32826e-05	0.000127137	AAEL002555	sodium/solute symporter [Source:VB Community Annotation]			GO:0016020,GO:0016021,GO:0022857,GO:0055085	membrane,integral component of membrane,transmembrane transporter activity,transmembrane transport
LOC5572944	1347.3	-0.656957	0.150896	-4.35372	1.33848e-05	0.000128021	AAEL020528				GO:0008270	zinc ion binding
LOC5576353	3533.96	0.523825	0.120402	4.35064	1.3574e-05	0.000129734	AAEL002881	NADH:ubiquinone dehydrogenase, putative [Source:VB Community Annotation]			GO:0016020,GO:0016021	membrane,integral component of membrane
LOC5567085	54.9973	2.19335	0.504604	4.34668	1.38213e-05	0.000132	AAEL026928				GO:0006508,GO:0008233,GO:0008237,GO:0008270,GO:0016020,GO:0016021,GO:0016787,GO:0046872	proteolysis,peptidase activity,metallopeptidase activity,zinc ion binding,membrane,integral component of membrane,hydrolase activity,metal ion binding
LOC5578796	2624.53	0.553844	0.127507	4.34363	1.40147e-05	0.000133748	AAEL003675	ubiquinol-cytochrome c reductase iron-sulfur subunit [Source:VB Community Annotation]			GO:0005739,GO:0005743,GO:0008121,GO:0016020,GO:0016021,GO:0016491,GO:0016679,GO:0022900,GO:0046872,GO:0051536,GO:0051537,GO:0055114,GO:0070469	mitochondrion,mitochondrial inner membrane,ubiquinol-cytochrome-c reductase activity,membrane,integral component of membrane,oxidoreductase activity,oxidoreductase activity, acting on diphenols and related substances as donors,electron transport chain,metal ion binding,iron-sulfur cluster binding,2 iron, 2 sulfur cluster binding,oxidation-reduction process,respirasome
LOC5564266	3397.05	-0.50735	0.11683	-4.34265	1.40774e-05	0.000134246	AAEL014365	chromaffin granule amine transporter, putative [Source:VB Community Annotation]			GO:0016020,GO:0016021,GO:0022857,GO:0055085	membrane,integral component of membrane,transmembrane transporter activity,transmembrane transport
LOC5580272	2038.33	-0.5899	0.135924	-4.33993	1.42529e-05	0.000135742	AAEL003005
LOC5568996	2243.65	-0.697161	0.16064	-4.33989	1.42553e-05	0.000135742	AAEL007290
LOC5574072	85.4883	1.45286	0.33479	4.3396	1.42741e-05	0.00013582	AAEL010909				GO:0003676	nucleic acid binding
LOC5565252	403.78	-1.19337	0.275086	-4.33817	1.43674e-05	0.000136607	AAEL014774				GO:0000724,GO:0003677,GO:0006281,GO:0006310,GO:0006974	double-strand break repair via homologous recombination,DNA binding,DNA repair,DNA recombination,cellular response to DNA damage stimulus
LOC5565950	345.753	-0.741757	0.171072	-4.33592	1.4515e-05	0.000137909	AAEL005838				GO:0000166,GO:0003676,GO:0004828,GO:0005524,GO:0005634,GO:0006434,GO:0008270,GO:0046872	nucleotide binding,nucleic acid binding,serine-tRNA ligase activity,ATP binding,nucleus,seryl-tRNA aminoacylation,zinc ion binding,metal ion binding
LOC5566037	53.2026	-1.8445	0.425428	-4.33564	1.45337e-05	0.000137985	AAEL015051	glycoside hydrolases [Source:VB Community Annotation]			GO:0004553,GO:0005975	hydrolase activity, hydrolyzing O-glycosyl compounds,carbohydrate metabolic process
LOC5564757	12.4461	3.67535	0.847805	4.33514	1.45669e-05	0.000138009	AAEL014604	cytochrome P450 [Source:VB Community Annotation]			GO:0004497,GO:0005506,GO:0016020,GO:0016021,GO:0016491,GO:0016705,GO:0020037,GO:0046872,GO:0055114	monooxygenase activity,iron ion binding,membrane,integral component of membrane,oxidoreductase activity,oxidoreductase activity, acting on paired donors, with incorporation or reduction of molecular oxygen,heme binding,metal ion binding,oxidation-reduction process
LOC110680225	840.672	-0.55012	0.126899	-4.33511	1.45685e-05	0.000138009	AAEL027169
LOC5567522	840.672	-0.55012	0.126899	-4.33511	1.45685e-05	0.000138009	AAEL027583
LOC110680570	158.719	-0.87093	0.200924	-4.33463	1.46006e-05	0.000138212	AAEL028081
LOC5577104	45.401	-2.48285	0.573076	-4.3325	1.47423e-05	0.00013945	AAEL013004
LOC5567344	1372.74	-0.615898	0.142173	-4.33204	1.47736e-05	0.000139644	AAEL019477				GO:0005096,GO:0030695,GO:0043547,GO:0050790,GO:0051056	GTPase activator activity,GTPase regulator activity,positive regulation of GTPase activity,regulation of catalytic activity,regulation of small GTPase mediated signal transduction
LOC110680952	18.8505	3.66602	0.846376	4.33143	1.48147e-05	0.00013993	AAEL021781
LOC110674014	120.629	-0.991305	0.229029	-4.3283	1.50268e-05	0.000141829	AAEL023474
LOC5576991	167.787	-1.04975	0.242654	-4.32611	1.51764e-05	0.000143136	AAEL018290				GO:0000166,GO:0004672,GO:0005524,GO:0006468	nucleotide binding,protein kinase activity,ATP binding,protein phosphorylation
LOC5579400	82.9272	1.21353	0.280561	4.32536	1.52284e-05	0.000143521	AAEL024757				GO:0015276,GO:0016020,GO:0034220	ligand-gated ion channel activity,membrane,ion transmembrane transport
LOC5576030	1780.38	-0.619511	0.143249	-4.32472	1.52724e-05	0.000143831	AAEL012267	macroglobulin/complement [Source:VB Community Annotation]			GO:0004866,GO:0005515,GO:0005576,GO:0005615,GO:0010951	endopeptidase inhibitor activity,protein binding,extracellular region,extracellular space,negative regulation of endopeptidase activity
LOC5577187	1158.44	-0.548628	0.126936	-4.32208	1.54566e-05	0.000145459	AAEL025801				GO:0005515	protein binding
LOC5576852	1013.45	-0.762511	0.176437	-4.32171	1.54822e-05	0.000145594	AAEL012835	85 kda calcium-independent phospholipase A2 (ipla2) [Source:VB Community Annotation]			GO:0005515,GO:0006629,GO:0016042,GO:0016787	protein binding,lipid metabolic process,lipid catabolic process,hydrolase activity
LOC5571245	642.979	-0.608405	0.140809	-4.32079	1.55474e-05	0.0001461	AAEL019503				GO:0005515	protein binding
LOC110678410	19.0203	2.77736	0.643572	4.31554	1.59216e-05	0.000149507	AAEL022173
LOC5569192	526.061	-1.39309	0.322921	-4.31403	1.60306e-05	0.000150421	AAEL007450	Odd skipped, putative [Source:UniProtKB/TrEMBL;Acc:A0A1S4FGI2]			GO:0003676	nucleic acid binding
LOC110676679	26.4405	-3.78611	0.878096	-4.31173	1.61983e-05	0.000151808	AAEL022190				GO:0005576,GO:0008200,GO:0009405	extracellular region,ion channel inhibitor activity,pathogenesis
LOC110675699	7.31829	6.454	1.49686	4.31168	1.62019e-05	0.000151808	AAEL024482
LOC5565427	12.7476	3.69752	0.857625	4.31135	1.62263e-05	0.000151925	AAEL000633	Toll-like receptor [Source:VB Community Annotation]	TOLL8		GO:0005515,GO:0007165,GO:0016020,GO:0016021	protein binding,signal transduction,membrane,integral component of membrane
LOC5564177	1713.66	-0.466745	0.108322	-4.30886	1.641e-05	0.000153533	AAEL003534				GO:0005096,GO:0043547	GTPase activator activity,positive regulation of GTPase activity
LOC5570509	6476.48	0.406241	0.0942991	4.30801	1.6473e-05	0.000154012	AAEL001432	protein disulfide isomerase [Source:VB Community Annotation]			GO:0003756,GO:0005623,GO:0005783,GO:0005788,GO:0016853,GO:0045454	protein disulfide isomerase activity,obsolete cell,endoplasmic reticulum,endoplasmic reticulum lumen,isomerase activity,cell redox homeostasis
LOC110679459	171.935	-1.16094	0.2695	-4.30776	1.64914e-05	0.000154071	AAEL019816
LOC110674873	415.991	-0.684867	0.159053	-4.3059	1.66308e-05	0.000155261	AAEL023750
LOC5574409	124.355	0.971395	0.225639	4.30508	1.66928e-05	0.000155727	AAEL011135	GPN-loop GTPase 3 [Source:UniProtKB/TrEMBL;Acc:Q16QZ2]			GO:0000166,GO:0005525,GO:0016787	nucleotide binding,GTP binding,hydrolase activity
LOC5576573	67.8834	1.42673	0.331661	4.30178	1.69431e-05	0.000157935	AAEL023549
LOC5571541	12.2906	5.34884	1.24344	4.30164	1.69541e-05	0.000157935	AAEL009123	cytochrome P450 [Source:VB Community Annotation]	CYP6Z6		GO:0004497,GO:0005506,GO:0016491,GO:0016705,GO:0020037,GO:0046872,GO:0055114	monooxygenase activity,iron ion binding,oxidoreductase activity,oxidoreductase activity, acting on paired donors, with incorporation or reduction of molecular oxygen,heme binding,metal ion binding,oxidation-reduction process
LOC5567847	1948.46	-0.563063	0.130916	-4.30094	1.70073e-05	0.000158316	AAEL000994
LOC110674266	28.6366	2.41788	0.5624	4.29923	1.71396e-05	0.000159433	AAEL020748				GO:0005576,GO:0008061	extracellular region,chitin binding
LOC5578379	64.762	2.10436	0.489652	4.29767	1.72604e-05	0.000160441	AAEL013662	anterior fat body protein [Source:VB Community Annotation]
LOC5572025	75.347	1.2635	0.294433	4.29128	1.77643e-05	0.000165006	AAEL000247				GO:0003341,GO:0005515,GO:0007399	cilium movement,protein binding,nervous system development
LOC5572161	1818.39	0.602628	0.140527	4.28835	1.80009e-05	0.000167083	AAEL009574	elongase, putative [Source:VB Community Annotation]			GO:0006629,GO:0006631,GO:0006633,GO:0016020,GO:0016021,GO:0016740,GO:0102336,GO:0102337,GO:0102338,GO:0102756	lipid metabolic process,fatty acid metabolic process,fatty acid biosynthetic process,membrane,integral component of membrane,transferase activity,3-oxo-arachidoyl-CoA synthase activity,3-oxo-cerotoyl-CoA synthase activity,3-oxo-lignoceronyl-CoA synthase activity,very-long-chain 3-ketoacyl-CoA synthase activity
LOC5578303	23.3554	2.80366	0.653896	4.28762	1.80597e-05	0.000167508	AAEL013613	pyruvate dehydrogenase [Source:VB Community Annotation]			GO:0004739,GO:0006086,GO:0016491,GO:0016624,GO:0043231,GO:0055114	pyruvate dehydrogenase (acetyl-transferring) activity,acetyl-CoA biosynthetic process from pyruvate,oxidoreductase activity,oxidoreductase activity, acting on the aldehyde or oxo group of donors, disulfide as acceptor,intracellular membrane-bounded organelle,oxidation-reduction process
LOC5566566	975.136	-0.495053	0.115507	-4.28592	1.81984e-05	0.000168673	AAEL005481	alpha-glucosidase [Source:VB Community Annotation]			GO:0004553,GO:0005975,GO:0008152,GO:0016020,GO:0016021,GO:0016787,GO:0016798	hydrolase activity, hydrolyzing O-glycosyl compounds,carbohydrate metabolic process,metabolic process,membrane,integral component of membrane,hydrolase activity,hydrolase activity, acting on glycosyl bonds
LOC5564247	714.462	-0.682495	0.159253	-4.28561	1.82242e-05	0.000168791	AAEL004196	galectin [Source:VB Community Annotation]	GALE3		GO:0016021,GO:0030246	integral component of membrane,carbohydrate binding
LOC5569995	119.84	1.15449	0.269437	4.28482	1.82888e-05	0.000169267	AAEL000213	d-amino acid oxidase [Source:VB Community Annotation]			GO:0003884,GO:0016491,GO:0046416,GO:0055114,GO:0071949	D-amino-acid oxidase activity,oxidoreductase activity,D-amino acid metabolic process,oxidation-reduction process,FAD binding
LOC5567286	813.556	0.64581	0.150776	4.28323	1.84201e-05	0.00017036	AAEL005946	NADH-ubiquinone oxidoreductase subunit B14.5b [Source:VB Community Annotation]			GO:0005739,GO:0005743,GO:0006120,GO:0008137,GO:0016020,GO:0016021,GO:0055114,GO:0070469	mitochondrion,mitochondrial inner membrane,mitochondrial electron transport, NADH to ubiquinone,NADH dehydrogenase (ubiquinone) activity,membrane,integral component of membrane,oxidation-reduction process,respirasome
LOC5570553	1582.84	-0.525361	0.122682	-4.28231	1.84963e-05	0.000170942	AAEL008374	E3 ubiquitin-protein ligase nedd-4 [Source:VB Community Annotation]			GO:0004842,GO:0005515,GO:0006511,GO:0016567,GO:0061630	ubiquitin-protein transferase activity,protein binding,ubiquitin-dependent protein catabolic process,protein ubiquitination,ubiquitin protein ligase activity
LOC5575113	522.587	-0.702961	0.164204	-4.28103	1.86028e-05	0.000171803	AAEL011651	L-caldesmon, putative [Source:UniProtKB/TrEMBL;Acc:A0A1S4FTY8]			GO:0003676,GO:0003723	nucleic acid binding,RNA binding
LOC5572277	1546.06	0.456943	0.106813	4.27798	1.88593e-05	0.000174046	AAEL001751	cyclin [Source:VB Community Annotation]			GO:0000079,GO:0006357,GO:0016538,GO:0042025	regulation of cyclin-dependent protein serine/threonine kinase activity,regulation of transcription by RNA polymerase II,cyclin-dependent protein serine/threonine kinase regulator activity,host cell nucleus
LOC23687802	3291.42	-0.386075	0.0902926	-4.27582	1.90438e-05	0.000175623	AAEL018254				GO:0000077,GO:0000166,GO:0004672,GO:0004674,GO:0005524,GO:0005634,GO:0006468,GO:0016301,GO:0016310,GO:0016740	DNA damage checkpoint,nucleotide binding,protein kinase activity,protein serine/threonine kinase activity,ATP binding,nucleus,protein phosphorylation,kinase activity,phosphorylation,transferase activity
LOC110681081	178.392	-1.28946	0.301587	-4.27559	1.90628e-05	0.000175672	AAEL028067
LOC110679432	17.9746	2.94806	0.690023	4.27241	1.93369e-05	0.000177989	AAEL021752
LOC5571284	1822.72	-0.49934	0.116877	-4.27236	1.93418e-05	0.000177989	AAEL001540	ubiquitin specific protease [Source:VB Community Annotation]			GO:0004843,GO:0006511,GO:0016579,GO:0036459	thiol-dependent ubiquitin-specific protease activity,ubiquitin-dependent protein catabolic process,protein deubiquitination,thiol-dependent ubiquitinyl hydrolase activity
LOC5578658	581.167	-0.701527	0.164231	-4.27158	1.94095e-05	0.000178378	AAEL025404				GO:0004622,GO:0005783,GO:0005789,GO:0006629,GO:0007275,GO:0007399,GO:0016020,GO:0016042,GO:0016787,GO:0046470	lysophospholipase activity,endoplasmic reticulum,endoplasmic reticulum membrane,lipid metabolic process,multicellular organism development,nervous system development,membrane,lipid catabolic process,hydrolase activity,phosphatidylcholine metabolic process
LOC5578527	4629.53	-1.05733	0.247529	-4.27155	1.94118e-05	0.000178378	AAEL013733	Protein distal antenna [Source:VB Community Annotation]			GO:0003677,GO:0003700,GO:0005634,GO:0006355,GO:0007275,GO:0007379,GO:0007469,GO:0048749	DNA binding,DNA-binding transcription factor activity,nucleus,regulation of transcription, DNA-templated,multicellular organism development,segment specification,antennal development,compound eye development
LOC5576578	118.449	-1.73128	0.405469	-4.26982	1.95627e-05	0.000179595	AAEL002932
LOC5567622	39.0377	-1.71621	0.401949	-4.26972	1.95722e-05	0.000179595	AAEL006219	heparan sulphate 2-o-sulfotransferase [Source:VB Community Annotation]			GO:0000139,GO:0008146,GO:0016020,GO:0016021,GO:0016740	Golgi membrane,sulfotransferase activity,membrane,integral component of membrane,transferase activity
LOC110677082	25.632	-2.2128	0.518397	-4.26855	1.9675e-05	0.00018041	AAEL024939				GO:0005515	protein binding
LOC5577108	600.757	-0.54408	0.127495	-4.26748	1.97692e-05	0.000181145	AAEL013003
LOC110674025	93.089	1.7656	0.413777	4.26704	1.98086e-05	0.000181377	AAEL021538
LOC110676628	49.6622	1.59866	0.374677	4.26676	1.98337e-05	0.000181477	AAEL022339
LOC110674175	170.413	0.903831	0.211862	4.26613	1.98896e-05	0.000181799	AAEL027264				GO:0004497,GO:0005506,GO:0016705,GO:0020037,GO:0055114	monooxygenase activity,iron ion binding,oxidoreductase activity, acting on paired donors, with incorporation or reduction of molecular oxygen,heme binding,oxidation-reduction process
LOC110674115	301.502	-1.63594	0.383478	-4.26604	1.98971e-05	0.000181799	AAEL024316
LOC5569512	1549.63	-0.649035	0.152192	-4.26458	2.0028e-05	0.000182866	AAEL019819				GO:0000166,GO:0000287,GO:0005524,GO:0015914,GO:0016020,GO:0016021,GO:0034204,GO:0140326	nucleotide binding,magnesium ion binding,ATP binding,phospholipid transport,membrane,integral component of membrane,lipid translocation,ATPase-coupled intramembrane lipid transporter activity
LOC5571613	323.411	3.35908	0.78793	4.26317	2.01549e-05	0.000183894	AAEL009193	glucose dehydrogenase [Source:VB Community Annotation]			GO:0016614,GO:0050660,GO:0055114	oxidoreductase activity, acting on CH-OH group of donors,flavin adenine dinucleotide binding,oxidation-reduction process
LOC110677654	24.2441	-2.53768	0.595453	-4.26177	2.02816e-05	0.000184919	AAEL025234
LOC110676059	41.9002	1.94006	0.455326	4.26082	2.03677e-05	0.000185572	AAEL024649
LOC5568982	842.971	-0.528654	0.124166	-4.25764	2.066e-05	0.000188102	AAEL007279				GO:0003677,GO:0003700,GO:0005634,GO:0005667,GO:0006355	DNA binding,DNA-binding transcription factor activity,nucleus,transcription regulator complex,regulation of transcription, DNA-templated
LOC5564049	665.452	-0.698346	0.164041	-4.25714	2.0706e-05	0.000188388	AAEL004064	meiotic checkpoint regulator cut4 [Source:VB Community Annotation]			GO:0005680,GO:0007049,GO:0051301	anaphase-promoting complex,cell cycle,cell division
LOC5578266	781.309	-1.59804	0.375453	-4.25629	2.07848e-05	0.000188971	AAEL003505	jun [Source:VB Community Annotation]			GO:0003677,GO:0003700,GO:0005634,GO:0006355,GO:0006357	DNA binding,DNA-binding transcription factor activity,nucleus,regulation of transcription, DNA-templated,regulation of transcription by RNA polymerase II
LOC5565520	915.941	-1.29249	0.303698	-4.25585	2.08255e-05	0.000189208	AAEL014871	methylenetetrahydrofolate dehydrogenase [Source:VB Community Annotation]			GO:0003824,GO:0004477,GO:0004488,GO:0006730,GO:0016491,GO:0016787,GO:0055114	catalytic activity,methenyltetrahydrofolate cyclohydrolase activity,methylenetetrahydrofolate dehydrogenase (NADP+) activity,one-carbon metabolic process,oxidoreductase activity,hydrolase activity,oxidation-reduction process
LOC5569113	20.7374	2.49793	0.587106	4.25465	2.09377e-05	0.000190093	AAEL007378				GO:0016020,GO:0016021,GO:0022857,GO:0055085	membrane,integral component of membrane,transmembrane transporter activity,transmembrane transport
LOC5574528	190.429	0.832168	0.195629	4.25381	2.10168e-05	0.000190676	AAEL011200
LOC5572022	13.7813	-4.59766	1.08258	-4.24695	2.16702e-05	0.000196396	AAEL000243	leucine-rich transmembrane protein [Source:VB Community Annotation]			GO:0005515	protein binding
LOC5567255	638.217	1.00131	0.235776	4.24687	2.16777e-05	0.000196396	AAEL005929	ATP-binding cassette transporter [Source:VB Community Annotation]			GO:0000166,GO:0005524,GO:0016020,GO:0016021,GO:0016887,GO:0042626,GO:0055085	nucleotide binding,ATP binding,membrane,integral component of membrane,ATPase activity,ATPase-coupled transmembrane transporter activity,transmembrane transport
LOC5564298	2113.86	-0.560696	0.13205	-4.24607	2.17548e-05	0.000196956	AAEL000589	serine/threonine protein kinase [Source:VB Community Annotation]			GO:0004672,GO:0005524,GO:0006468	protein kinase activity,ATP binding,protein phosphorylation
LOC5572548	1862.83	-0.557287	0.131292	-4.24464	2.1894e-05	0.000198077	AAEL009874				GO:0046872	metal ion binding
LOC110675253	191.647	2.10126	0.495058	4.24448	2.19104e-05	0.000198086	AAEL027881				GO:0005509,GO:0005886,GO:0007155,GO:0007156,GO:0016020	calcium ion binding,plasma membrane,cell adhesion,homophilic cell adhesion via plasma membrane adhesion molecules,membrane
LOC5574432	963.054	-0.716789	0.168892	-4.24408	2.19494e-05	0.0001983	AAEL019610				GO:0005515,GO:0008017	protein binding,microtubule binding
LOC5566569	11.7353	4.61298	1.08724	4.24282	2.20729e-05	0.000199275	AAEL011459				GO:0042302	structural constituent of cuticle
LOC5570445	20.1551	2.92994	0.6912	4.23892	2.24596e-05	0.000202624	AAEL015073				GO:0003677,GO:0003700,GO:0005634,GO:0006355	DNA binding,DNA-binding transcription factor activity,nucleus,regulation of transcription, DNA-templated
LOC5579391	176.755	0.896286	0.211515	4.23746	2.26062e-05	0.000203804	AAEL015493				GO:0005737,GO:0005764,GO:0016020,GO:0016021,GO:0048471	cytoplasm,lysosome,membrane,integral component of membrane,perinuclear region of cytoplasm
LOC5571937	11583.2	0.460036	0.10857	4.23725	2.26275e-05	0.000203854	AAEL009422				GO:0003676,GO:0046872	nucleic acid binding,metal ion binding
LOC5578355	228.705	-1.02182	0.241339	-4.23398	2.2959e-05	0.000206695	AAEL003543
LOC5569041	276.96	-0.769292	0.18175	-4.2327	2.30904e-05	0.000207733	AAEL025775				GO:0005515,GO:0008168,GO:0032259	protein binding,methyltransferase activity,methylation
LOC5574077	758.381	-0.620247	0.146546	-4.23243	2.31184e-05	0.000207839	AAEL021209				GO:0005515,GO:0010997,GO:0097027,GO:1904668	protein binding,anaphase-promoting complex binding,ubiquitin-protein transferase activator activity,positive regulation of ubiquitin protein ligase activity
LOC5574907	42.2059	3.42304	0.809036	4.23101	2.32647e-05	0.000209009	AAEL027545				GO:0016020,GO:0016021,GO:0016747	membrane,integral component of membrane,transferase activity, transferring acyl groups other than amino-acyl groups
LOC110675955	265.955	0.752059	0.177787	4.23011	2.33577e-05	0.000209698	AAEL023530				GO:0005515	protein binding
LOC110676764	47.2184	3.39007	0.801492	4.2297	2.34005e-05	0.000209936	AAEL028011
LOC5573350	666.546	-0.580085	0.137206	-4.22782	2.35962e-05	0.000211372	AAEL010444
LOC5574266	432.468	-0.677214	0.160184	-4.22772	2.3607e-05	0.000211372	AAEL006636	GPCR Leukokinin Family [Source:VB Community Annotation]	GPRLLK1_1		GO:0004930,GO:0004983,GO:0007165,GO:0007186,GO:0007218,GO:0016020,GO:0016021	G protein-coupled receptor activity,neuropeptide Y receptor activity,signal transduction,G protein-coupled receptor signaling pathway,neuropeptide signaling pathway,membrane,integral component of membrane
LOC5580252	2963.32	-0.527196	0.124701	-4.22769	2.36098e-05	0.000211372	AAEL012546	DNA replication licensing factor MCM6 [Source:VB Community Annotation]			GO:0000166,GO:0003677,GO:0003678,GO:0004386,GO:0005524,GO:0005634,GO:0006260,GO:0006270,GO:0016787,GO:0032508,GO:0042555	nucleotide binding,DNA binding,DNA helicase activity,helicase activity,ATP binding,nucleus,DNA replication,DNA replication initiation,hydrolase activity,DNA duplex unwinding,MCM complex
LOC5577652	66.2572	2.74379	0.649177	4.22656	2.37286e-05	0.000212288	AAEL003262	leucine-rich transmembrane protein [Source:VB Community Annotation]			GO:0005515,GO:0016020,GO:0016021	protein binding,membrane,integral component of membrane
LOC5570547	39.2544	1.63935	0.387988	4.22526	2.38664e-05	0.000213373	AAEL026547
LOC5572600	804.329	0.630079	0.149135	4.22488	2.3907e-05	0.000213587	AAEL009911	rotamase [Source:VB Community Annotation]			GO:0000413,GO:0003755,GO:0005515,GO:0016853	protein peptidyl-prolyl isomerization,peptidyl-prolyl cis-trans isomerase activity,protein binding,isomerase activity
LOC5564834	21.6362	3.30161	0.781567	4.22435	2.39632e-05	0.000213941	AAEL000623				GO:0001228,GO:0003677,GO:0005634,GO:0006355,GO:0007275,GO:0045944	DNA-binding transcription activator activity, RNA polymerase II-specific,DNA binding,nucleus,regulation of transcription, DNA-templated,multicellular organism development,positive regulation of transcription by RNA polymerase II
LOC5573165	19.5664	2.58422	0.611893	4.22332	2.40726e-05	0.000214768	AAEL002007	protein serine/threonine kinase, putative [Source:VB Community Annotation]
LOC5574879	94.8191	1.44676	0.342652	4.22223	2.41897e-05	0.000215647	AAEL011488	short-chain dehydrogenase [Source:VB Community Annotation]			GO:0055114	oxidation-reduction process
LOC5577458	975.33	0.657508	0.15573	4.22209	2.42046e-05	0.000215647	AAEL013207
LOC5574185	10.6452	6.01079	1.42381	4.22162	2.42551e-05	0.000215948	AAEL022107
LOC5564622	62.866	2.99787	0.710232	4.22097	2.43254e-05	0.000216424	AAEL014544	prophenoloxidase [Source:VB Community Annotation]	PPO6		GO:0004497,GO:0016491,GO:0046872,GO:0055114	monooxygenase activity,oxidoreductase activity,metal ion binding,oxidation-reduction process
LOC5571918	1327.43	-0.616285	0.146014	-4.22073	2.43511e-05	0.000216503	AAEL020200				GO:0003723,GO:0003724,GO:0004386,GO:0005737,GO:0032574,GO:0035194	RNA binding,RNA helicase activity,helicase activity,cytoplasm,5'-3' RNA helicase activity,post-transcriptional gene silencing by RNA
LOC110680265	487.46	-0.708874	0.167988	-4.2198	2.44519e-05	0.000217099	AAEL005140				GO:0016020,GO:0016021	membrane,integral component of membrane
LOC5566066	487.46	-0.708874	0.167988	-4.2198	2.44519e-05	0.000217099	AAEL022249				GO:0016021	integral component of membrane
LOC5564068	88.3076	1.82721	0.433038	4.21952	2.44826e-05	0.000217205	AAEL025030				GO:0004806,GO:0005576,GO:0006629,GO:0052689	triglyceride lipase activity,extracellular region,lipid metabolic process,carboxylic ester hydrolase activity
LOC5572083	1153.94	-0.650035	0.154059	-4.21938	2.44976e-05	0.000217205	AAEL009495	rab6-interacting [Source:VB Community Annotation]			GO:0005515,GO:0016020	protein binding,membrane
LOC5568492	400.467	-0.694417	0.164704	-4.21614	2.48517e-05	0.000220193	AAEL006900
LOC5568709	772.566	-0.627328	0.148845	-4.21465	2.50167e-05	0.000221503	AAEL007048				GO:0003676,GO:0003677,GO:0005634,GO:0008270,GO:0046872	nucleic acid binding,DNA binding,nucleus,zinc ion binding,metal ion binding
LOC110674522	12.3709	3.4536	0.819574	4.21389	2.51005e-05	0.000222092	AAEL025485
LOC5568004	59.947	2.31933	0.550501	4.21312	2.51863e-05	0.000222698	AAEL006434	serine protease, putative [Source:VB Community Annotation]			GO:0004252,GO:0006508	serine-type endopeptidase activity,proteolysis
LOC110675701	12.2191	6.21252	1.47537	4.21082	2.54449e-05	0.00022483	AAEL023405
LOC5569031	938.964	-0.682542	0.162171	-4.20876	2.56771e-05	0.000226726	AAEL019714				GO:0016020,GO:0016021	membrane,integral component of membrane
LOC110678432	18.6614	2.74533	0.652764	4.20571	2.60267e-05	0.000229656	AAEL021446
LOC5571678	489.469	-0.920389	0.218925	-4.20413	2.62086e-05	0.000231102	AAEL001647				GO:0005515	protein binding
LOC5569049	109.789	1.50465	0.358058	4.20226	2.64262e-05	0.000232862	AAEL007342				GO:0005765,GO:0010008,GO:0016020,GO:0016021,GO:0046872	lysosomal membrane,endosome membrane,membrane,integral component of membrane,metal ion binding
LOC110677093	210.476	-0.940043	0.223731	-4.20166	2.64967e-05	0.000233323	AAEL028026				GO:0003676,GO:0005634,GO:0008270,GO:0046872	nucleic acid binding,nucleus,zinc ion binding,metal ion binding
LOC5580248	20.5213	2.62664	0.625418	4.19981	2.67142e-05	0.000235078	AAEL019691	Short neuropeptide F [Source:UniProtKB/Swiss-Prot;Acc:A0SIX6]	sNPF		GO:0005184,GO:0005576,GO:0007218,GO:0032095,GO:0040014	neuropeptide hormone activity,extracellular region,neuropeptide signaling pathway,regulation of response to food,regulation of multicellular organism growth
LOC5574307	461.508	0.815079	0.194177	4.19761	2.69751e-05	0.000237212	AAEL024640
LOC5568853	669.054	-0.648077	0.1544	-4.19738	2.70026e-05	0.000237291	AAEL007150	ATP-dependent RNA helicase [Source:VB Community Annotation]			GO:0000166,GO:0003676,GO:0003724,GO:0004386,GO:0005524,GO:0016787	nucleotide binding,nucleic acid binding,RNA helicase activity,helicase activity,ATP binding,hydrolase activity
LOC5567998	1683.52	0.462475	0.110193	4.19694	2.70546e-05	0.000237586	AAEL006435	Mevalonate kinase [Source:UniProtKB/TrEMBL;Acc:Q176C1]			GO:0000166,GO:0004496,GO:0005524,GO:0005737,GO:0006629,GO:0006694,GO:0008202,GO:0008299,GO:0016126,GO:0016301,GO:0016310,GO:0016740,GO:0019287	nucleotide binding,mevalonate kinase activity,ATP binding,cytoplasm,lipid metabolic process,steroid biosynthetic process,steroid metabolic process,isoprenoid biosynthetic process,sterol biosynthetic process,kinase activity,phosphorylation,transferase activity,isopentenyl diphosphate biosynthetic process, mevalonate pathway
LOC5570531	1430.29	1.0942	0.260866	4.19449	2.73487e-05	0.000240005	AAEL001434	coronin [Source:VB Community Annotation]			GO:0005515	protein binding
LOC5575938	8141.51	0.532509	0.12701	4.19264	2.75724e-05	0.000241803	AAEL022729				GO:0005634	nucleus
LOC5569881	24.1626	3.71403	0.885964	4.19208	2.7641e-05	0.00024224	AAEL019649				GO:0016020,GO:0016021	membrane,integral component of membrane
LOC5568403	23891.8	-0.494672	0.11804	-4.19072	2.78076e-05	0.000243534	AAEL006820	lipid storage droplets surface binding protein 2 (lsd2) [Source:VB Community Annotation]
LOC23687778	279.415	3.54279	0.846333	4.18605	2.83854e-05	0.000248426	AAEL027911
LOC5580215	11.5764	4.18442	1.00027	4.18327	2.87343e-05	0.000251308	AAEL011924				GO:0005267,GO:0006811,GO:0006813,GO:0016020,GO:0016021,GO:0071805	potassium channel activity,ion transport,potassium ion transport,membrane,integral component of membrane,potassium ion transmembrane transport
LOC5572011	1159.93	-2.37453	0.567711	-4.18265	2.88133e-05	0.000251828	AAEL021276				GO:0016020,GO:0016021	membrane,integral component of membrane
LOC110678273	67.9562	1.54683	0.369908	4.18167	2.89371e-05	0.000252738	AAEL019954				GO:0008271,GO:0008272,GO:0015116,GO:0016020,GO:0016021,GO:0055085	secondary active sulfate transmembrane transporter activity,sulfate transport,sulfate transmembrane transporter activity,membrane,integral component of membrane,transmembrane transport
LOC5568599	5085.85	-0.458699	0.109701	-4.18135	2.89779e-05	0.000252923	AAEL019594				GO:0005515,GO:0008168,GO:0016740,GO:0032259	protein binding,methyltransferase activity,transferase activity,methylation
LOC5572790	49.0224	-1.6509	0.395181	-4.17758	2.94627e-05	0.000256981	AAEL001903				GO:0005634,GO:0008270,GO:0046872	nucleus,zinc ion binding,metal ion binding
LOC5568971	23.4478	2.43097	0.582039	4.17664	2.95847e-05	0.00025787	AAEL018137				GO:0016020,GO:0016021	membrane,integral component of membrane
LOC5577572	62.7266	1.61254	0.386128	4.17619	2.96427e-05	0.000258201	AAEL013281	serine-type enodpeptidase [Source:VB Community Annotation]			GO:0004252,GO:0006508,GO:0008233,GO:0008236,GO:0016787	serine-type endopeptidase activity,proteolysis,peptidase activity,serine-type peptidase activity,hydrolase activity
LOC5565452	72.0151	1.68453	0.403686	4.17289	3.00764e-05	0.000261801	AAEL000663				GO:0005634,GO:0010494	nucleus,cytoplasmic stress granule
LOC5576260	108.313	-1.11253	0.266686	-4.17168	3.02366e-05	0.000263018	AAEL012417				GO:0016020,GO:0016021,GO:0016746	membrane,integral component of membrane,transferase activity, transferring acyl groups
LOC5569928	62.9943	2.14838	0.515011	4.17152	3.02577e-05	0.000263024	AAEL008031	carbonic anhydrase [Source:VB Community Annotation]			GO:0004089,GO:0008270	carbonate dehydratase activity,zinc ion binding
LOC5570765	288.049	-1.15258	0.276315	-4.17125	3.02938e-05	0.00026316	AAEL021303				GO:0003676,GO:0005634,GO:0008270,GO:0046872	nucleic acid binding,nucleus,zinc ion binding,metal ion binding
LOC5567863	22.7229	5.1199	1.22794	4.16952	3.05246e-05	0.000264986	AAEL006319
LOC5567483	1325.01	-1.14008	0.273601	-4.16693	3.08732e-05	0.000267831	AAEL000973				GO:0005179,GO:0005576,GO:0007165	hormone activity,extracellular region,signal transduction
LOC5570705	203.957	-1.73039	0.41533	-4.16629	3.09594e-05	0.000268398	AAEL001442	map-kinase activating death domain protein (madd)/denn/aex-3(c.elegans) [Source:VB Community Annotation]			GO:0005737,GO:0006915,GO:0016020	cytoplasm,apoptotic process,membrane
LOC5574375	287.619	-1.20873	0.290302	-4.1637	3.13133e-05	0.000271283	AAEL021533				GO:0005789,GO:0016020,GO:0030314	endoplasmic reticulum membrane,membrane,junctional membrane complex
LOC5564400	4309.52	-0.422711	0.101528	-4.16351	3.13395e-05	0.000271328	AAEL004235	kinesin-like protein Klp10A [Source:VB Community Annotation]			GO:0000166,GO:0003774,GO:0003777,GO:0005524,GO:0005874,GO:0007018,GO:0008017	nucleotide binding,motor activity,microtubule motor activity,ATP binding,microtubule,microtubule-based movement,microtubule binding
LOC5572074	495.656	-0.641949	0.154278	-4.16098	3.16879e-05	0.00027416	AAEL001725				GO:0003824,GO:0005975	catalytic activity,carbohydrate metabolic process
LOC110674596	69.3718	-2.37567	0.570963	-4.16081	3.17117e-05	0.000274181	AAEL023831
LOC5575852	481.686	-0.617997	0.148544	-4.16038	3.17723e-05	0.000274521	AAEL012120	fad oxidoreductase [Source:VB Community Annotation]			GO:0016491,GO:0055114	oxidoreductase activity,oxidation-reduction process
LOC110679365	3486.22	-0.8297	0.199468	-4.15957	3.18853e-05	0.000275313	AAEL020525				GO:0003723,GO:0003729,GO:0003743,GO:0005515	RNA binding,mRNA binding,translation initiation factor activity,protein binding
LOC5579485	236.545	0.910811	0.21924	4.1544	3.26138e-05	0.000281414	AAEL011012	Septin [Source:UniProtKB/TrEMBL;Acc:A0A1S4FS27]			GO:0000166,GO:0005525	nucleotide binding,GTP binding
LOC5566716	561.207	-0.727101	0.175036	-4.154	3.26714e-05	0.000281723	AAEL005556				GO:0003676	nucleic acid binding
LOC5564376	2679.58	0.648214	0.156121	4.15198	3.29607e-05	0.000284027	AAEL014408	m-phase inducer phosphatase(cdc25) [Source:VB Community Annotation]			GO:0004721,GO:0004725,GO:0006470,GO:0007049,GO:0016787,GO:0035335,GO:0051301,GO:1902751	phosphoprotein phosphatase activity,protein tyrosine phosphatase activity,protein dephosphorylation,cell cycle,hydrolase activity,peptidyl-tyrosine dephosphorylation,cell division,positive regulation of cell cycle G2/M phase transition
LOC5564124	88.4453	1.94888	0.46955	4.15053	3.317e-05	0.000285639	AAEL004086	aldo-keto reductase [Source:VB Community Annotation]			GO:0016491,GO:0055114	oxidoreductase activity,oxidation-reduction process
LOC5570114	14.5009	4.5389	1.09389	4.14933	3.33448e-05	0.000286953	AAEL008079	trypsin-alpha, putative [Source:VB Community Annotation]			GO:0004252,GO:0006508,GO:0016020,GO:0016021	serine-type endopeptidase activity,proteolysis,membrane,integral component of membrane
LOC110681170	73.7747	-1.286	0.309962	-4.1489	3.34071e-05	0.000287296	AAEL021655
LOC5566320	69.0376	-1.37014	0.330264	-4.14862	3.34482e-05	0.000287458	AAEL023443
LOC5574750	282.148	0.873256	0.21052	4.14809	3.35259e-05	0.000287933	AAEL011387	leucine-rich repeat [Source:VB Community Annotation]			GO:0005515	protein binding
LOC5573854	4346.04	-0.596885	0.143912	-4.14756	3.36033e-05	0.000288406	AAEL010781	ap endonuclease [Source:VB Community Annotation]			GO:0003677,GO:0004518,GO:0004519,GO:0006281,GO:0006974,GO:0016787,GO:0046872,GO:0090305,GO:0140078	DNA binding,nuclease activity,endonuclease activity,DNA repair,cellular response to DNA damage stimulus,hydrolase activity,metal ion binding,nucleic acid phosphodiester bond hydrolysis,class I DNA-(apurinic or apyrimidinic site) endonuclease activity
LOC110678345	16.4934	3.91488	0.944453	4.14514	3.39612e-05	0.000291284	AAEL021984
LOC5563652	417.712	-0.563277	0.135945	-4.14342	3.42162e-05	0.000293275	AAEL000033				GO:0005634,GO:0016180,GO:0032039	nucleus,snRNA processing,integrator complex
LOC5572535	67.1684	2.35444	0.568305	4.14292	3.42912e-05	0.000293616	AAEL009864	Putative conserved secreted protein [Source:UniProtKB/TrEMBL;Acc:A0A0P6IY40]			GO:0016020,GO:0016021	membrane,integral component of membrane
LOC5571735	1536.54	0.503772	0.1216	4.14285	3.43016e-05	0.000293616	AAEL009257				GO:0004129,GO:0005739,GO:0005743,GO:0006119,GO:0016020,GO:0016021,GO:0022900,GO:1902600	cytochrome-c oxidase activity,mitochondrion,mitochondrial inner membrane,oxidative phosphorylation,membrane,integral component of membrane,electron transport chain,proton transmembrane transport
LOC5574321	46.9091	2.449	0.591185	4.14252	3.43511e-05	0.000293845	AAEL020042				GO:0003677,GO:0005634	DNA binding,nucleus
LOC5576379	598.693	-0.603286	0.145651	-4.142	3.44284e-05	0.00029431	AAEL012476
LOC5564813	193.314	1.67321	0.404126	4.14031	3.46838e-05	0.000296297	AAEL014635	engrailed [Source:VB Community Annotation]			GO:0000981,GO:0003677,GO:0005634,GO:0006355,GO:0006357,GO:0007275,GO:0043565	DNA-binding transcription factor activity, RNA polymerase II-specific,DNA binding,nucleus,regulation of transcription, DNA-templated,regulation of transcription by RNA polymerase II,multicellular organism development,sequence-specific DNA binding
LOC5566159	85.4483	1.70094	0.41095	4.13904	3.48755e-05	0.000297735	AAEL005229	ptpla domain protein [Source:VB Community Annotation]			GO:0005783,GO:0005789,GO:0006629,GO:0006631,GO:0006633,GO:0016020,GO:0016021,GO:0016829,GO:0102158,GO:0102343,GO:0102344,GO:0102345	endoplasmic reticulum,endoplasmic reticulum membrane,lipid metabolic process,fatty acid metabolic process,fatty acid biosynthetic process,membrane,integral component of membrane,lyase activity,very-long-chain 3-hydroxyacyl-CoA dehydratase activity,3-hydroxy-arachidoyl-CoA dehydratase activity,3-hydroxy-behenoyl-CoA dehydratase activity,3-hydroxy-lignoceroyl-CoA dehydratase activity
LOC5564381	24.2416	2.53648	0.61284	4.13889	3.48984e-05	0.000297735	AAEL014412	cytochrome P450 [Source:VB Community Annotation]	CYP304B2		GO:0004497,GO:0005506,GO:0016020,GO:0016021,GO:0016491,GO:0016705,GO:0020037,GO:0046872,GO:0055114	monooxygenase activity,iron ion binding,membrane,integral component of membrane,oxidoreductase activity,oxidoreductase activity, acting on paired donors, with incorporation or reduction of molecular oxygen,heme binding,metal ion binding,oxidation-reduction process
LOC5569686	439.146	-0.709241	0.171385	-4.13828	3.49912e-05	0.000298329	AAEL007835	serine/threonine protein kinase [Source:VB Community Annotation]			GO:0000166,GO:0004672,GO:0005524,GO:0006468	nucleotide binding,protein kinase activity,ATP binding,protein phosphorylation
LOC5565410	110.179	2.36201	0.571263	4.13472	3.55389e-05	0.000302798	AAEL014852
LOC5573491	243.62	1.24853	0.302068	4.13328	3.57625e-05	0.000304502	AAEL010536	alpha-amylase [Source:VB Community Annotation]			GO:0003824,GO:0005975,GO:0008152,GO:0016798	catalytic activity,carbohydrate metabolic process,metabolic process,hydrolase activity, acting on glycosyl bonds
LOC5568011	1006.31	-0.85031	0.205739	-4.13296	3.58126e-05	0.000304726	AAEL006474	ATP-dependent Lon protease, putative [Source:VB Community Annotation]			GO:0000166,GO:0003677,GO:0004176,GO:0004252,GO:0005524,GO:0005739,GO:0005759,GO:0006508,GO:0006515,GO:0008233,GO:0008236,GO:0016787,GO:0016887,GO:0030163,GO:0034599,GO:0043565,GO:0051131,GO:0070407	nucleotide binding,DNA binding,ATP-dependent peptidase activity,serine-type endopeptidase activity,ATP binding,mitochondrion,mitochondrial matrix,proteolysis,protein quality control for misfolded or incompletely synthesized proteins,peptidase activity,serine-type peptidase activity,hydrolase activity,ATPase activity,protein catabolic process,cellular response to oxidative stress,sequence-specific…
LOC5570610	36.2524	3.44045	0.83271	4.13163	3.60196e-05	0.000306286	AAEL008414
LOC5565937	496.987	-1.24515	0.301561	-4.12901	3.64328e-05	0.000309594	AAEL024930				GO:0005112,GO:0005509,GO:0005515,GO:0007154,GO:0007219,GO:0007275,GO:0016020,GO:0016021	Notch binding,calcium ion binding,protein binding,cell communication,Notch signaling pathway,multicellular organism development,membrane,integral component of membrane
LOC110676980	51.802	2.52479	0.611894	4.12618	3.68837e-05	0.000313219	AAEL024746
LOC5577692	11.8524	3.91558	0.949011	4.12596	3.69194e-05	0.000313316	AAEL013325
LOC5568525	799.082	-1.45703	0.353325	-4.12376	3.72742e-05	0.000316118	AAEL024980				GO:0005515,GO:0007040	protein binding,lysosome organization
LOC5568475	452.026	0.883699	0.214344	4.1228	3.743e-05	0.000317231	AAEL022496				GO:0001736,GO:0005737,GO:0005886,GO:0007164,GO:0007275,GO:0008270,GO:0009948,GO:0016020,GO:0046872	establishment of planar polarity,cytoplasm,plasma membrane,establishment of tissue polarity,multicellular organism development,zinc ion binding,anterior/posterior axis specification,membrane,metal ion binding
LOC5575604	512.369	1.07728	0.261368	4.1217	3.76092e-05	0.00031854	AAEL011934	glutathione transferase [Source:VB Community Annotation]	GSTZ1		GO:0003824,GO:0005515,GO:0005737,GO:0006559,GO:0006572,GO:0009072,GO:0016034,GO:0016853	catalytic activity,protein binding,cytoplasm,L-phenylalanine catabolic process,tyrosine catabolic process,aromatic amino acid family metabolic process,maleylacetoacetate isomerase activity,isomerase activity
LOC5571011	1585.6	0.637265	0.154621	4.12146	3.76474e-05	0.000318654	AAEL008736	p31A, putative [Source:VB Community Annotation]			GO:0003677,GO:0005634,GO:0006355	DNA binding,nucleus,regulation of transcription, DNA-templated
LOC5575366	14.2182	4.97137	1.20677	4.11958	3.79563e-05	0.000321057	AAEL011763	prophenoloxidase [Source:VB Community Annotation]	PPO3		GO:0004497,GO:0016491,GO:0046872,GO:0055114	monooxygenase activity,oxidoreductase activity,metal ion binding,oxidation-reduction process
LOC5567214	21.2015	2.90955	0.706319	4.11931	3.80004e-05	0.00032122	AAEL028205				GO:0003677,GO:0005634	DNA binding,nucleus
LOC5564142	79.6893	1.90899	0.463445	4.11914	3.80297e-05	0.000321256	AAEL004106	hairy protein [Source:VB Community Annotation]			GO:0003677,GO:0005634,GO:0006355,GO:0046983	DNA binding,nucleus,regulation of transcription, DNA-templated,protein dimerization activity
LOC5577128	1509.73	-0.514289	0.124871	-4.11856	3.81242e-05	0.000321843	AAEL013025				GO:0003723,GO:0003724,GO:0004386,GO:0005737,GO:0032574,GO:0032575,GO:0035194	RNA binding,RNA helicase activity,helicase activity,cytoplasm,5'-3' RNA helicase activity,GO_0032575,post-transcriptional gene silencing by RNA
LOC5572795	607.888	-0.587046	0.142544	-4.11834	3.81612e-05	0.000321944	AAEL001915	tyrosine protein kinase [Source:VB Community Annotation]			GO:0004383,GO:0004672,GO:0004713,GO:0004965,GO:0005524,GO:0006182,GO:0006468,GO:0007186,GO:0016020,GO:0016021,GO:0016301,GO:0016310,GO:0016829,GO:0018108	guanylate cyclase activity,protein kinase activity,protein tyrosine kinase activity,G protein-coupled GABA receptor activity,ATP binding,cGMP biosynthetic process,protein phosphorylation,G protein-coupled receptor signaling pathway,membrane,integral component of membrane,kinase activity,phosphorylation,lyase activity,peptidyl-tyrosine phosphorylation
LOC5571610	780.978	-3.14439	0.763584	-4.11794	3.82272e-05	0.00032229	AAEL009205				GO:0016020,GO:0016021,GO:0022857,GO:0055085	membrane,integral component of membrane,transmembrane transporter activity,transmembrane transport
LOC5580164	6801.6	-0.631073	0.153257	-4.11774	3.82598e-05	0.000322304	AAEL002557	cationic amino acid transporter [Source:VB Community Annotation]			GO:0016020,GO:0016021,GO:0022857,GO:0055085	membrane,integral component of membrane,transmembrane transporter activity,transmembrane transport
LOC110674113	222.522	-1.59544	0.387466	-4.11763	3.82789e-05	0.000322304	AAEL025310
LOC5569655	1815.37	-0.782376	0.190024	-4.11726	3.83409e-05	0.000322615	AAEL007805
LOC5572954	431.8	-0.953923	0.2317	-4.11706	3.8373e-05	0.000322674	AAEL010182
LOC5573561	331.35	-1.21534	0.295221	-4.11671	3.84313e-05	0.000322954	AAEL010598				GO:0000184,GO:0003723,GO:0005515,GO:0005737	nuclear-transcribed mRNA catabolic process, nonsense-mediated decay,RNA binding,protein binding,cytoplasm
LOC5566729	2777.63	-0.411167	0.099913	-4.11525	3.86758e-05	0.000324688	AAEL018344				GO:0000166,GO:0003676,GO:0003678,GO:0004386,GO:0005524,GO:0005634,GO:0006310,GO:0016787,GO:0032508	nucleotide binding,nucleic acid binding,DNA helicase activity,helicase activity,ATP binding,nucleus,DNA recombination,hydrolase activity,DNA duplex unwinding
LOC5579990	2010	-0.464374	0.112844	-4.11518	3.86882e-05	0.000324688	AAEL001742				GO:0019903,GO:0043666	protein phosphatase binding,regulation of phosphoprotein phosphatase activity
LOC110681033	787.684	0.559801	0.136104	4.11303	3.90502e-05	0.000327513	AAEL027639
LOC110676297	4451.19	0.447121	0.108737	4.11196	3.92312e-05	0.000328679	AAEL027453				GO:0004550,GO:0006165,GO:0006183,GO:0006228,GO:0006241	nucleoside diphosphate kinase activity,nucleoside diphosphate phosphorylation,GTP biosynthetic process,UTP biosynthetic process,CTP biosynthetic process
LOC5571426	41.7261	1.80644	0.439319	4.11191	3.92403e-05	0.000328679	AAEL009056				GO:0003677,GO:0005634	DNA binding,nucleus
LOC5570328	513.456	-0.869872	0.21171	-4.10879	3.9773e-05	0.000332924	AAEL001387				GO:0005737,GO:0005764,GO:0005765,GO:0016020	cytoplasm,lysosome,lysosomal membrane,membrane
LOC5573797	2548.1	-0.501627	0.1221	-4.10833	3.98524e-05	0.000333195	AAEL024508				GO:0001503,GO:0003746,GO:0005634,GO:0006357,GO:0006368,GO:0006414,GO:0007155,GO:0070449	ossification,translation elongation factor activity,nucleus,regulation of transcription by RNA polymerase II,transcription elongation from RNA polymerase II promoter,translational elongation,cell adhesion,elongin complex
LOC5565507	157.446	0.935652	0.22775	4.10825	3.9867e-05	0.000333195	AAEL004809
LOC5567260	435.616	0.684526	0.166626	4.10816	3.9883e-05	0.000333195	AAEL005928
LOC5579987	392.606	-0.636138	0.154943	-4.10562	4.03236e-05	0.000336658	AAEL001740	candidate tumor suppressor protein [Source:VB Community Annotation]			GO:0008299,GO:0016740	isoprenoid biosynthetic process,transferase activity
LOC110675449	150.996	-1.68688	0.410948	-4.10485	4.04579e-05	0.00033756	AAEL026131
LOC5574850	35.7356	1.90287	0.463759	4.10314	4.07583e-05	0.000339846	AAEL011463	cytochrome P450 [Source:VB Community Annotation]			GO:0004497,GO:0005506,GO:0016491,GO:0016705,GO:0020037,GO:0046872,GO:0055114	monooxygenase activity,iron ion binding,oxidoreductase activity,oxidoreductase activity, acting on paired donors, with incorporation or reduction of molecular oxygen,heme binding,metal ion binding,oxidation-reduction process
LOC5565097	555.656	-0.707125	0.172425	-4.10106	4.11254e-05	0.000342685	AAEL004583				GO:0004867,GO:0010466,GO:0010951,GO:0016020,GO:0016021,GO:0030414	serine-type endopeptidase inhibitor activity,negative regulation of peptidase activity,negative regulation of endopeptidase activity,membrane,integral component of membrane,peptidase inhibitor activity
LOC5576769	1305.61	-3.86136	0.941735	-4.10026	4.12682e-05	0.000343653	AAEL012755
LOC110680462	389.765	0.618638	0.150889	4.09995	4.1324e-05	0.000343734	AAEL010461
LOC5568469	122.475	1.72395	0.420486	4.09991	4.13314e-05	0.000343734	AAEL006888
LOC110679283	82.3201	-1.97298	0.481482	-4.09772	4.17236e-05	0.000346772	AAEL024111
LOC5577537	961.32	-0.825392	0.201467	-4.09691	4.18694e-05	0.000347759	AAEL013252				GO:0000139,GO:0000166,GO:0003924,GO:0005525,GO:0005768,GO:0005794,GO:0005802,GO:0005829,GO:0006895,GO:0016020,GO:0031901,GO:0032456,GO:0042742,GO:0045335,GO:0055037,GO:0090382	Golgi membrane,nucleotide binding,GTPase activity,GTP binding,endosome,Golgi apparatus,trans-Golgi network,cytosol,Golgi to endosome transport,membrane,early endosome membrane,endocytic recycling,defense response to bacterium,phagocytic vesicle,recycling endosome,phagosome maturation
LOC5576480	745.691	-0.788243	0.192482	-4.09514	4.21905e-05	0.0003502	AAEL002892	protein kinase c, mu [Source:VB Community Annotation]			GO:0000166,GO:0004672,GO:0004674,GO:0004697,GO:0004698,GO:0005524,GO:0005737,GO:0006468,GO:0016020,GO:0016301,GO:0016310,GO:0016740,GO:0035556,GO:0046872	nucleotide binding,protein kinase activity,protein serine/threonine kinase activity,protein kinase C activity,calcium-dependent protein kinase C activity,ATP binding,cytoplasm,protein phosphorylation,membrane,kinase activity,phosphorylation,transferase activity,intracellular signal transduction,metal ion binding
LOC5569036	154.895	1.30154	0.317861	4.0947	4.22724e-05	0.000350654	AAEL022309
LOC5568583	1194.53	-0.538927	0.131625	-4.09441	4.23236e-05	0.000350853	AAEL001113	inorganic phosphate cotransporter, putative [Source:VB Community Annotation]			GO:0016020,GO:0016021,GO:0022857,GO:0055085	membrane,integral component of membrane,transmembrane transporter activity,transmembrane transport
LOC5565466	863.367	-0.634239	0.154922	-4.09392	4.24145e-05	0.00035138	AAEL004790	ubiquitin-protein ligase [Source:VB Community Annotation]			GO:0004842,GO:0005515,GO:0016567	ubiquitin-protein transferase activity,protein binding,protein ubiquitination
LOC5564766	875.22	-0.79995	0.195453	-4.09281	4.26179e-05	0.000352838	AAEL004431	phospholipase c gamma [Source:VB Community Annotation]			GO:0004435,GO:0005515,GO:0006629,GO:0007165,GO:0008081,GO:0009395,GO:0016042,GO:0016787,GO:0035556	phosphatidylinositol phospholipase C activity,protein binding,lipid metabolic process,signal transduction,phosphoric diester hydrolase activity,phospholipid catabolic process,lipid catabolic process,hydrolase activity,intracellular signal transduction
LOC5565780	380.634	-0.676577	0.165431	-4.08978	4.3179e-05	0.000357254	AAEL004970				GO:0000166,GO:0004371,GO:0005524,GO:0006071,GO:0016301,GO:0016310,GO:0016740,GO:0034012	nucleotide binding,glycerone kinase activity,ATP binding,glycerol metabolic process,kinase activity,phosphorylation,transferase activity,FAD-AMP lyase (cyclizing) activity
LOC5565931	1569.99	0.746805	0.182667	4.08834	4.34473e-05	0.000359243	AAEL025321				GO:0005739,GO:0005759,GO:0009055,GO:0022900,GO:0055114	mitochondrion,mitochondrial matrix,electron transfer activity,electron transport chain,oxidation-reduction process
LOC5573051	31.6133	2.26518	0.554499	4.08509	4.40606e-05	0.00036408	AAEL010220
LOC5579050	1057.6	-0.447704	0.109633	-4.08365	4.43331e-05	0.000366096	AAEL013985	DEAD box ATP-dependent RNA helicase [Source:VB Community Annotation]			GO:0000166,GO:0003676,GO:0003724,GO:0004386,GO:0005524,GO:0016787	nucleotide binding,nucleic acid binding,RNA helicase activity,helicase activity,ATP binding,hydrolase activity
LOC23687793	59.4463	1.88199	0.4609	4.08328	4.44043e-05	0.000366449	AAEL021532	Putative rhythmically [Source:UniProtKB/TrEMBL;Acc:A0A0P6ITL0]			GO:0016787	hydrolase activity
LOC5564486	70.0406	7.71689	1.89014	4.0827	4.45151e-05	0.000367129	AAEL004280	Osiris, putative [Source:VB Community Annotation]			GO:0016020,GO:0016021	membrane,integral component of membrane
LOC5570401	110.327	1.05191	0.257691	4.08208	4.46347e-05	0.000367879	AAEL012447	elastase, putative [Source:VB Community Annotation]			GO:0004252,GO:0006508	serine-type endopeptidase activity,proteolysis
LOC5576363	7.43601	6.47896	1.58742	4.08143	4.47587e-05	0.000368665	AAEL002880				GO:0004252,GO:0006508	serine-type endopeptidase activity,proteolysis
LOC5564490	892.772	-1.34296	0.329154	-4.08004	4.50276e-05	0.000370643	AAEL019535				GO:0003677,GO:0005634,GO:0005694,GO:0008168,GO:0008270,GO:0016740,GO:0018024,GO:0032259,GO:0034968	DNA binding,nucleus,chromosome,methyltransferase activity,zinc ion binding,transferase activity,histone-lysine N-methyltransferase activity,methylation,histone lysine methylation
LOC5572566	525.917	3.24746	0.796126	4.07908	4.52148e-05	0.000371946	AAEL009888	sodium-coupled cation-chloride cotransporter [Source:VB Community Annotation]	CCC2		GO:0006811,GO:0015293,GO:0015377,GO:0016020,GO:0016021,GO:0022857,GO:0055085,GO:1902476	ion transport,symporter activity,cation:chloride symporter activity,membrane,integral component of membrane,transmembrane transporter activity,transmembrane transport,chloride transmembrane transport
LOC5579474	894.945	-0.976426	0.239469	-4.07746	4.55302e-05	0.000374301	AAEL015356				GO:0005637,GO:0016020,GO:0016021	nuclear inner membrane,membrane,integral component of membrane
LOC5577252	24.2919	3.59488	0.882264	4.07461	4.60922e-05	0.00037868	AAEL013111	glutamate transporter [Source:VB Community Annotation]			GO:0015293,GO:0016020,GO:0016021,GO:0055085	symporter activity,membrane,integral component of membrane,transmembrane transport
LOC5574668	407.781	-0.648071	0.159113	-4.07303	4.64048e-05	0.000381005	AAEL023822				GO:0000166,GO:0004540,GO:0004672,GO:0004674,GO:0005515,GO:0005524,GO:0006397,GO:0006468,GO:0016020,GO:0016301,GO:0016310,GO:0016740,GO:0090501	nucleotide binding,ribonuclease activity,protein kinase activity,protein serine/threonine kinase activity,protein binding,ATP binding,mRNA processing,protein phosphorylation,membrane,kinase activity,phosphorylation,transferase activity,RNA phosphodiester bond hydrolysis
LOC5574055	354.56	-0.71884	0.176496	-4.07284	4.64429e-05	0.000381074	AAEL010895				GO:0000139,GO:0016020,GO:0016021,GO:0016192	Golgi membrane,membrane,integral component of membrane,vesicle-mediated transport
LOC5574564	5328.13	-0.355253	0.0872427	-4.07201	4.6609e-05	0.000382194	AAEL011240				GO:0003676	nucleic acid binding
LOC5566855	29.1471	2.39956	0.589339	4.07162	4.66881e-05	0.000382598	AAEL000820	dimethylaniline monooxygenase [Source:VB Community Annotation]			GO:0004497,GO:0004499,GO:0016491,GO:0050660,GO:0050661,GO:0055114	monooxygenase activity,N,N-dimethylaniline monooxygenase activity,oxidoreductase activity,flavin adenine dinucleotide binding,NADP binding,oxidation-reduction process
LOC5576486	864.824	0.694267	0.170542	4.07094	4.68229e-05	0.00038346	AAEL002913	peroxisomal membrane protein 70 abcd3 [Source:VB Community Annotation]			GO:0000166,GO:0005524,GO:0005777,GO:0015910,GO:0016020,GO:0016021,GO:0016887,GO:0042626,GO:0042803,GO:0055085	nucleotide binding,ATP binding,peroxisome,long-chain fatty acid import into peroxisome,membrane,integral component of membrane,ATPase activity,ATPase-coupled transmembrane transporter activity,protein homodimerization activity,transmembrane transport
LOC23687880	174.668	1.26363	0.310419	4.07072	4.68676e-05	0.000383581	AAEL017460	Angiotensin-converting enzyme [Source:UniProtKB/TrEMBL;Acc:A0A1S4G6D0]			GO:0004180,GO:0006508,GO:0008233,GO:0008237,GO:0008241,GO:0016020,GO:0016787,GO:0046872	carboxypeptidase activity,proteolysis,peptidase activity,metallopeptidase activity,peptidyl-dipeptidase activity,membrane,hydrolase activity,metal ion binding
LOC5577399	509.14	-0.884365	0.217265	-4.07045	4.69218e-05	0.000383781	AAEL025042				GO:0000166,GO:0003676,GO:0003678,GO:0003824,GO:0004386,GO:0005524,GO:0005634,GO:0006260,GO:0006281,GO:0006310,GO:0016787,GO:0032508,GO:0043138,GO:0044237	nucleotide binding,nucleic acid binding,DNA helicase activity,catalytic activity,helicase activity,ATP binding,nucleus,DNA replication,DNA repair,DNA recombination,hydrolase activity,DNA duplex unwinding,3'-5' DNA helicase activity,cellular metabolic process
LOC5572540	298.897	1.75316	0.430737	4.07014	4.69841e-05	0.000384047	AAEL009876				GO:0004623,GO:0005576,GO:0006629,GO:0006644,GO:0016042,GO:0016787,GO:0046872,GO:0050482,GO:0102567,GO:0102568	phospholipase A2 activity,extracellular region,lipid metabolic process,phospholipid metabolic process,lipid catabolic process,hydrolase activity,metal ion binding,arachidonic acid secretion,phospholipase A2 activity (consuming 1,2-dipalmitoylphosphatidylcholine),phospholipase A2 activity consuming 1,2-dioleoylphosphatidylethanolamine)
LOC5578976	786.798	-0.968358	0.237986	-4.06897	4.72211e-05	0.000385739	AAEL027879
LOC5571592	125.96	1.95347	0.480223	4.06784	4.74505e-05	0.000387367	AAEL026147				GO:0005509,GO:0005515,GO:0005576,GO:0007275	calcium ion binding,protein binding,extracellular region,multicellular organism development
LOC5575741	218.318	0.705504	0.173479	4.06679	4.76647e-05	0.000388817	AAEL012051				GO:0016020,GO:0016021	membrane,integral component of membrane
LOC5579231	735.046	-0.684295	0.168269	-4.06668	4.76885e-05	0.000388817	AAEL014072	tip60 [Source:VB Community Annotation]			GO:0004402,GO:0005634,GO:0006355,GO:0016573,GO:0016740,GO:0035267	histone acetyltransferase activity,nucleus,regulation of transcription, DNA-templated,histone acetylation,transferase activity,NuA4 histone acetyltransferase complex
LOC5570430	692.275	-0.521676	0.128295	-4.06622	4.77825e-05	0.000389337	AAEL008324	zinc finger protein [Source:VB Community Annotation]			GO:0003676	nucleic acid binding
LOC5569047	3621.13	-0.472634	0.116339	-4.06256	4.85371e-05	0.000395217	AAEL020651				GO:0005634,GO:0005737,GO:0006417,GO:0030015	nucleus,cytoplasm,regulation of translation,CCR4-NOT core complex
LOC5567179	516.19	-0.704496	0.173418	-4.06242	4.85656e-05	0.000395217	AAEL000922	polyribonucleotide nucleotidyltransferase [Source:VB Community Annotation]			GO:0003676,GO:0003723,GO:0004654,GO:0005737,GO:0006396,GO:0006402,GO:0016740,GO:0016779	nucleic acid binding,RNA binding,polyribonucleotide nucleotidyltransferase activity,cytoplasm,RNA processing,mRNA catabolic process,transferase activity,nucleotidyltransferase activity
LOC5574895	946.66	-0.455338	0.112094	-4.0621	4.86324e-05	0.000395511	AAEL019416				GO:0008270,GO:0046872	zinc ion binding,metal ion binding
LOC110679430	13.9703	-5.25395	1.29372	-4.06113	4.88359e-05	0.000396915	AAEL027556
LOC5570806	3166.49	-0.501479	0.123491	-4.06085	4.88952e-05	0.000397147	AAEL008578				GO:0046872	metal ion binding
LOC5573100	906.172	-0.777807	0.191576	-4.06004	4.90639e-05	0.000398265	AAEL010290	Short-chain dehydrogenase [Source:UniProtKB/TrEMBL;Acc:A0A1S4FQ43]			GO:0016020,GO:0016021,GO:0055114	membrane,integral component of membrane,oxidation-reduction process
LOC5580241	616.673	-0.65195	0.160713	-4.05662	4.97879e-05	0.000403887	AAEL012325				GO:0005737,GO:0043248,GO:0060090	cytoplasm,proteasome assembly,molecular adaptor activity
LOC5574625	49.6922	3.33735	0.822894	4.05563	4.99992e-05	0.000405346	AAEL011263	phosphatidylethanolamine-binding protein [Source:VB Community Annotation]
LOC5566649	15558.1	2.30089	0.568431	4.04779	5.17027e-05	0.000418893	AAEL005503				GO:0016020,GO:0016021	membrane,integral component of membrane
LOC110681024	53.0252	-1.63664	0.404552	-4.04555	5.21999e-05	0.000422655	AAEL027184
LOC5569750	5838.51	0.648738	0.16037	4.04526	5.22661e-05	0.000422925	AAEL007915	Moesin/ezrin/radixin homolog 1 [Source:UniProtKB/TrEMBL;Acc:A0A1S4FI28]			GO:0003779,GO:0005737,GO:0005856,GO:0005886,GO:0005912,GO:0008092,GO:0016020,GO:0030054,GO:0045197	actin binding,cytoplasm,cytoskeleton,plasma membrane,adherens junction,cytoskeletal protein binding,membrane,cell junction,establishment or maintenance of epithelial cell apical/basal polarity
LOC5568348	188.321	1.37619	0.340275	4.04434	5.24699e-05	0.000424307	AAEL001062
LOC5578234	2152.87	0.490053	0.121188	4.04374	5.26046e-05	0.00042513	AAEL013571	synaptobrevin [Source:VB Community Annotation]			GO:0016020,GO:0016021,GO:0016192	membrane,integral component of membrane,vesicle-mediated transport
LOC5571158	610.193	-0.506675	0.125415	-4.04	5.34522e-05	0.000431709	AAEL008842				GO:0005634,GO:0005737,GO:0008140,GO:0032793,GO:0051289	nucleus,cytoplasm,cAMP response element binding protein binding,positive regulation of CREB transcription factor activity,protein homotetramerization
LOC23687432	11298.2	0.56237	0.139207	4.03981	5.34947e-05	0.000431781	AAEL017012
LOC5571512	964.56	-0.610135	0.151122	-4.03736	5.40568e-05	0.000436045	AAEL009110	smad anchor for receptor activation [Source:VB Community Annotation]			GO:0046872	metal ion binding
LOC5573299	532.141	1.03624	0.256748	4.036	5.43709e-05	0.000438304	AAEL010374	tyrosine-protein kinase transmembrane receptor [Source:VB Community Annotation]			GO:0000166,GO:0004672,GO:0004713,GO:0004714,GO:0005515,GO:0005524,GO:0006468,GO:0007169,GO:0016020,GO:0016021,GO:0016301,GO:0016310,GO:0018108	nucleotide binding,protein kinase activity,protein tyrosine kinase activity,transmembrane receptor protein tyrosine kinase activity,protein binding,ATP binding,protein phosphorylation,transmembrane receptor protein tyrosine kinase signaling pathway,membrane,integral component of membrane,kinase activity,phosphorylation,peptidyl-tyrosine phosphorylation
LOC5580074	6281.36	0.523548	0.129749	4.0351	5.45802e-05	0.000439599	AAEL002178				GO:0016874	ligase activity
LOC110675560	76.8648	-1.94313	0.481578	-4.03492	5.46209e-05	0.000439599	AAEL023968
LOC5569137	26.08	2.19073	0.542949	4.03486	5.4634e-05	0.000439599	AAEL007401	roundabout, putative [Source:VB Community Annotation]			GO:0005515,GO:0007155,GO:0016020,GO:0016021	protein binding,cell adhesion,membrane,integral component of membrane
LOC5572193	6612.49	0.504906	0.125155	4.03424	5.47801e-05	0.000440499	AAEL009604	Receptor expression-enhancing protein [Source:UniProtKB/TrEMBL;Acc:Q16VD7]			GO:0016020,GO:0016021	membrane,integral component of membrane
LOC5573885	4778.42	-0.563092	0.139666	-4.03169	5.53762e-05	0.000445015	AAEL010798	ubiquitin-conjugating enzyme E2 g [Source:VB Community Annotation]			GO:0000166,GO:0005524,GO:0016740	nucleotide binding,ATP binding,transferase activity
LOC110675568	57.2601	1.70376	0.42284	4.02933	5.59372e-05	0.000449243	AAEL022382
LOC5564181	1154.44	-0.444184	0.110244	-4.02909	5.59941e-05	0.000449419	AAEL004131	gh regulated tbc protein-1 [Source:VB Community Annotation]
LOC5574799	1368.74	0.46531	0.115523	4.02784	5.62905e-05	0.000451516	AAEL002487	P53 regulated pa26 nuclear protein sestrin [Source:VB Community Annotation]			GO:0005634,GO:0005737,GO:1901031	nucleus,cytoplasm,regulation of response to reactive oxygen species
LOC5575346	13.6952	-3.29464	0.818185	-4.02677	5.65494e-05	0.00045331	AAEL002602	DNA photolyase [Source:VB Community Annotation]
LOC5574017	991.879	-0.455119	0.113047	-4.02591	5.67546e-05	0.000454672	AAEL010860				GO:0005829,GO:0032456,GO:0042147,GO:1990745	cytosol,endocytic recycling,retrograde transport, endosome to Golgi,EARP complex
LOC5566175	237.378	1.15783	0.28762	4.02557	5.68368e-05	0.000455048	AAEL005237				GO:0016020,GO:0016021	membrane,integral component of membrane
LOC5575496	4823.57	-0.405331	0.100759	-4.02278	5.75162e-05	0.000460201	AAEL027465				GO:0005634,GO:0005694,GO:0006260,GO:0006281,GO:0006974,GO:0035101	nucleus,chromosome,DNA replication,DNA repair,cellular response to DNA damage stimulus,FACT complex
LOC5567620	77.5752	2.05223	0.510333	4.02135	5.7866e-05	0.000462445	AAEL006216				GO:0005515	protein binding
LOC5580315	3939.95	-0.489878	0.12182	-4.02134	5.78685e-05	0.000462445	AAEL012897	aconitase, mitochondrial [Source:VB Community Annotation]			GO:0003994,GO:0005739,GO:0006099,GO:0016829,GO:0046872,GO:0047780,GO:0051536,GO:0051539	aconitate hydratase activity,mitochondrion,tricarboxylic acid cycle,lyase activity,metal ion binding,citrate dehydratase activity,iron-sulfur cluster binding,4 iron, 4 sulfur cluster binding
LOC5571668	98.7903	1.69772	0.422229	4.02086	5.79865e-05	0.00046283	AAEL019611				GO:0003700,GO:0006357	DNA-binding transcription factor activity,regulation of transcription by RNA polymerase II
LOC110677952	1110.74	0.740481	0.184167	4.0207	5.80245e-05	0.00046283	AAEL028182				GO:0000287,GO:0004450,GO:0006102,GO:0016616,GO:0051287,GO:0055114	magnesium ion binding,isocitrate dehydrogenase (NADP+) activity,isocitrate metabolic process,oxidoreductase activity, acting on the CH-OH group of donors, NAD or NADP as acceptor,NAD binding,oxidation-reduction process
LOC5576561	1110.74	0.740481	0.184167	4.0207	5.80245e-05	0.00046283	AAEL020590				GO:0000287,GO:0004450,GO:0006097,GO:0006099,GO:0006102,GO:0016491,GO:0016616,GO:0046872,GO:0051287,GO:0055114	magnesium ion binding,isocitrate dehydrogenase (NADP+) activity,glyoxylate cycle,tricarboxylic acid cycle,isocitrate metabolic process,oxidoreductase activity,oxidoreductase activity, acting on the CH-OH group of donors, NAD or NADP as acceptor,metal ion binding,NAD binding,oxidation-reduction process
LOC110674556	31.293	1.94367	0.483547	4.0196	5.82968e-05	0.000464714	AAEL021833
LOC5568207	147.18	-1.05776	0.263179	-4.01918	5.84016e-05	0.000465208	AAEL006650	potassium channel beta [Source:VB Community Annotation]			GO:0005244,GO:0005249,GO:0005737,GO:0006811,GO:0006813,GO:0034220,GO:0034765,GO:0071805	voltage-gated ion channel activity,voltage-gated potassium channel activity,cytoplasm,ion transport,potassium ion transport,ion transmembrane transport,regulation of ion transmembrane transport,potassium ion transmembrane transport
LOC110676629	64.9202	-2.62991	0.65436	-4.01906	5.8431e-05	0.000465208	AAEL026987
LOC5570522	1683.9	-0.55184	0.137313	-4.01884	5.84851e-05	0.00046535	AAEL001399				GO:0005515,GO:0005634	protein binding,nucleus
LOC5575250	61.5758	-2.38666	0.593903	-4.0186	5.85457e-05	0.000465545	AAEL019709				GO:0000166,GO:0003951,GO:0004143,GO:0005509,GO:0005524,GO:0005634,GO:0007165,GO:0007205,GO:0016301,GO:0016310,GO:0016740,GO:0035556,GO:0046872	nucleotide binding,NAD+ kinase activity,diacylglycerol kinase activity,calcium ion binding,ATP binding,nucleus,signal transduction,protein kinase C-activating G protein-coupled receptor signaling pathway,kinase activity,phosphorylation,transferase activity,intracellular signal transduction,metal ion binding
LOC110677980	235.954	-1.5195	0.378349	-4.01614	5.91598e-05	0.000470138	AAEL020946
LOC5565748	452.753	-0.909412	0.226604	-4.01322	5.98973e-05	0.000475705	AAEL014961	gdp mannose-4,6-dehydratase [Source:VB Community Annotation]			GO:0008446,GO:0016829,GO:0019673,GO:0042351	GDP-mannose 4,6-dehydratase activity,lyase activity,GDP-mannose metabolic process,'de novo' GDP-L-fucose biosynthetic process
LOC5573687	55.5031	2.4816	0.61842	4.0128	6.00016e-05	0.00047624	AAEL013348	lethal(2)essential for life protein, l2efl [Source:VB Community Annotation]			GO:0046872	metal ion binding
LOC5579184	425.534	-0.863674	0.215313	-4.01125	6.03972e-05	0.000479084	AAEL003887	vacuolar membrane protein pep11 [Source:VB Community Annotation]			GO:0005515,GO:0005623,GO:0006886,GO:0006904,GO:0007032,GO:0016020,GO:0016192,GO:0030674,GO:0046872	protein binding,obsolete cell,intracellular protein transport,vesicle docking involved in exocytosis,endosome organization,membrane,vesicle-mediated transport,protein-macromolecule adaptor activity,metal ion binding
LOC110678434	213.523	-1.55293	0.387195	-4.01071	6.05354e-05	0.000479885	AAEL020658
LOC5564962	657.45	0.5849	0.145849	4.01031	6.06401e-05	0.000480419	AAEL014889	NADH:ubiquinone dehydrogenase, putative [Source:VB Community Annotation]			GO:0005739,GO:0005747,GO:0006120,GO:0055114,GO:0070469	mitochondrion,mitochondrial respiratory chain complex I,mitochondrial electron transport, NADH to ubiquinone,oxidation-reduction process,respirasome
LOC5575199	51.9437	1.37205	0.342145	4.01013	6.0686e-05	0.000480487	AAEL000360	DNAJ homolog subfamily B member, putative [Source:VB Community Annotation]			GO:0006457,GO:0051082	protein folding,unfolded protein binding
LOC5568170	40.1441	1.52676	0.380796	4.00938	6.08796e-05	0.000481723	AAEL021388				GO:0003676,GO:0005634,GO:0008270	nucleic acid binding,nucleus,zinc ion binding
LOC110681021	442.419	-0.594398	0.14826	-4.00915	6.09376e-05	0.000481886	AAEL021091
LOC5574929	3675.22	-0.563569	0.140632	-4.00742	6.13867e-05	0.000485139	AAEL011527	eukaryotic translation initiation factor [Source:VB Community Annotation]			GO:0003743,GO:0006412,GO:0006413	translation initiation factor activity,translation,translational initiation
LOC5563940	4758.15	-0.640241	0.159831	-4.00573	6.1825e-05	0.000488304	AAEL014238	aromatic amino acid decarboxylase [Source:VB Community Annotation]			GO:0003824,GO:0006520,GO:0016829,GO:0016831,GO:0019752,GO:0030170	catalytic activity,cellular amino acid metabolic process,lyase activity,carboxy-lyase activity,carboxylic acid metabolic process,pyridoxal phosphate binding
LOC5563841	2989.91	2.20127	0.54967	4.00471	6.20937e-05	0.000490125	AAEL014171
LOC5576005	747.577	-0.566919	0.14161	-4.0034	6.24399e-05	0.000492556	AAEL012247				GO:0004672,GO:0005524,GO:0006468	protein kinase activity,ATP binding,protein phosphorylation
LOC5567811	51.1038	2.03227	0.507791	4.00218	6.27607e-05	0.000494783	AAEL000993	dally [Source:VB Community Annotation]			GO:0005886,GO:0009966,GO:0016020,GO:0030513,GO:0031225,GO:0045880,GO:0046658,GO:0062023,GO:0090263	plasma membrane,regulation of signal transduction,membrane,positive regulation of BMP signaling pathway,anchored component of membrane,positive regulation of smoothened signaling pathway,anchored component of plasma membrane,collagen-containing extracellular matrix,positive regulation of canonical Wnt signaling pathway
LOC5573509	111.005	1.17168	0.292918	4.00004	6.3332e-05	0.000498982	AAEL010551
LOC5570155	523.121	-0.607323	0.151894	-3.99834	6.37884e-05	0.00050227	AAEL008126	GPCR Latrophilin Family [Source:VB Community Annotation]	GPRCIR		GO:0005886,GO:0016020,GO:0016021,GO:0030246	plasma membrane,membrane,integral component of membrane,carbohydrate binding
LOC5572167	685.35	-0.567693	0.142005	-3.99769	6.39639e-05	0.000503345	AAEL023148				GO:0005515	protein binding
LOC5579851	2724.74	-0.684051	0.171133	-3.99718	6.41021e-05	0.000504123	AAEL005861	vacuolar sorting protein (vps) [Source:VB Community Annotation]			GO:0000139,GO:0005515,GO:0005576,GO:0005768,GO:0005783,GO:0005789,GO:0005794,GO:0005886,GO:0006897,GO:0010008,GO:0016020,GO:0016021,GO:0030658,GO:0031410,GO:0031901,GO:0032585,GO:0055038	Golgi membrane,protein binding,extracellular region,endosome,endoplasmic reticulum,endoplasmic reticulum membrane,Golgi apparatus,plasma membrane,endocytosis,endosome membrane,membrane,integral component of membrane,transport vesicle membrane,cytoplasmic vesicle,early endosome membrane,multivesicular body membrane,recycling endosome membrane
LOC5565494	871.909	-0.471837	0.11805	-3.99693	6.41703e-05	0.000504352	AAEL004802				GO:0000122,GO:0001227	negative regulation of transcription by RNA polymerase II,DNA-binding transcription repressor activity, RNA polymerase II-specific
LOC5573474	420.955	-0.583863	0.146191	-3.99384	6.50111e-05	0.000510648	AAEL005311				GO:0005515	protein binding
LOC5572349	707.485	0.605654	0.151667	3.9933	6.51603e-05	0.000511366	AAEL009731	epsilon-trimethyllysine 2-oxoglutarate dioxygenase [Source:VB Community Annotation]			GO:0003676,GO:0003677,GO:0005506,GO:0016491,GO:0045329,GO:0046872,GO:0050353,GO:0051213,GO:0055114	nucleic acid binding,DNA binding,iron ion binding,oxidoreductase activity,carnitine biosynthetic process,metal ion binding,trimethyllysine dioxygenase activity,dioxygenase activity,oxidation-reduction process
LOC5577920	31.9072	2.05851	0.5155	3.99322	6.51819e-05	0.000511366	AAEL003331				GO:0005515	protein binding
LOC5571458	1276.99	-0.598726	0.149943	-3.99302	6.5236e-05	0.000511479	AAEL009093	crumbs [Source:VB Community Annotation]			GO:0005509,GO:0016020,GO:0016021	calcium ion binding,membrane,integral component of membrane
LOC110678416	12.3214	3.50202	0.877654	3.9902	6.60174e-05	0.000517215	AAEL028165
LOC5570290	128.421	1.34255	0.336471	3.99009	6.60479e-05	0.000517215	AAEL024936				GO:0005515,GO:0032502	protein binding,developmental process
LOC5578249	45.6628	1.4681	0.368138	3.9879	6.66617e-05	0.000521704	AAEL013587	acidic ribosomal protein P1, putative [Source:VB Community Annotation]	RpLP1		GO:0003735,GO:0005840,GO:0006414	structural constituent of ribosome,ribosome,translational elongation
LOC5580160	1154.69	1.16498	0.292155	3.98753	6.67654e-05	0.000522198	AAEL011397				GO:0016020,GO:0016021	membrane,integral component of membrane
LOC110678425	23.445	2.0136	0.505106	3.98649	6.70588e-05	0.000524175	AAEL021526
LOC110675984	8.50358	5.68814	1.42736	3.98508	6.74565e-05	0.000526963	AAEL026909
LOC5572650	1106.07	0.618921	0.155353	3.98398	6.77715e-05	0.000529102	AAEL001865				GO:0005739,GO:0005743,GO:0016020,GO:0055114,GO:0070469	mitochondrion,mitochondrial inner membrane,membrane,oxidation-reduction process,respirasome
LOC5572304	296.938	1.49184	0.374802	3.98035	6.88146e-05	0.000536921	AAEL001776				GO:0000981,GO:0003677,GO:0005634,GO:0006355,GO:0006357,GO:0007275,GO:0043565	DNA-binding transcription factor activity, RNA polymerase II-specific,DNA binding,nucleus,regulation of transcription, DNA-templated,regulation of transcription by RNA polymerase II,multicellular organism development,sequence-specific DNA binding
LOC5570081	60.4322	1.8987	0.47704	3.98016	6.88678e-05	0.000537011	AAEL019483				GO:0003676	nucleic acid binding
LOC5564270	96.4274	1.05452	0.264983	3.97959	6.90353e-05	0.00053799	AAEL014369				GO:0042302	structural constituent of cuticle
LOC110676363	18.5399	2.6659	0.670099	3.97836	6.93929e-05	0.000540124	AAEL027549				GO:0016758	transferase activity, transferring hexosyl groups
LOC5576973	18.5399	2.6659	0.670099	3.97836	6.93929e-05	0.000540124	AAEL027016				GO:0016740,GO:0016758	transferase activity,transferase activity, transferring hexosyl groups
LOC5574628	1524.13	-0.445674	0.112096	-3.97581	7.01411e-05	0.000545617	AAEL011261	yemanuclein [Source:VB Community Annotation]
LOC110677276	270.806	1.38097	0.347398	3.97516	7.03307e-05	0.000546761	AAEL024645
LOC5574706	170.075	1.23017	0.309632	3.97302	7.09668e-05	0.000551374	AAEL011347
LOC5572481	388.475	-1.50588	0.379147	-3.97176	7.13434e-05	0.000553966	AAEL009811
LOC5571948	40.8696	1.75829	0.442747	3.97131	7.14792e-05	0.000554686	AAEL021559
LOC5565137	14.2187	3.17444	0.799416	3.97094	7.15886e-05	0.0005552	AAEL004602	neurogenic differentiation factor, putative [Source:VB Community Annotation]			GO:0046983	protein dimerization activity
LOC5577548	691.514	-0.511225	0.128785	-3.9696	7.19945e-05	0.000558011	AAEL013258				GO:0005737	cytoplasm
LOC5569265	38.7652	2.2685	0.571676	3.96816	7.24299e-05	0.000561049	AAEL007511	serine protease [Source:VB Community Annotation]			GO:0004252,GO:0006508,GO:0008233,GO:0008236,GO:0016787	serine-type endopeptidase activity,proteolysis,peptidase activity,serine-type peptidase activity,hydrolase activity
LOC5569077	1683.63	-0.454926	0.114676	-3.96706	7.27661e-05	0.000563314	AAEL001205	ubiquitin protein ligase [Source:VB Community Annotation]			GO:0004842,GO:0005515,GO:0006511,GO:0016567,GO:0061630	ubiquitin-protein transferase activity,protein binding,ubiquitin-dependent protein catabolic process,protein ubiquitination,ubiquitin protein ligase activity
LOC5579199	2970.66	0.553535	0.139636	3.96414	7.36609e-05	0.000569898	AAEL014039				GO:0016020,GO:0016021	membrane,integral component of membrane
LOC5571493	302.465	-0.676505	0.170736	-3.96228	7.42363e-05	0.000574005	AAEL001610				GO:0004842,GO:0016567	ubiquitin-protein transferase activity,protein ubiquitination
LOC5576972	30.0935	2.71715	0.685854	3.9617	7.4419e-05	0.000575072	AAEL003076	glucosyl/glucuronosyl transferases [Source:VB Community Annotation]			GO:0008194,GO:0016020,GO:0016021,GO:0016740,GO:0016757,GO:0016758	UDP-glycosyltransferase activity,membrane,integral component of membrane,transferase activity,transferase activity, transferring glycosyl groups,transferase activity, transferring hexosyl groups
LOC110679350	69.534	1.15165	0.290744	3.96105	7.46196e-05	0.000575941	AAEL020180
LOC5569249	1167.79	-0.475506	0.120045	-3.96105	7.4621e-05	0.000575941	AAEL020508
LOC5567259	1661.03	-0.800408	0.202094	-3.96057	7.47717e-05	0.000576759	AAEL005931	6-phosphogluconate dehydrogenase [Source:VB Community Annotation]			GO:0004616,GO:0006098,GO:0016491,GO:0019521,GO:0050661,GO:0055114	phosphogluconate dehydrogenase (decarboxylating) activity,pentose-phosphate shunt,oxidoreductase activity,D-gluconate metabolic process,NADP binding,oxidation-reduction process
LOC5576849	16.6289	3.29871	0.833468	3.95782	7.5638e-05	0.000583092	AAEL012832	cytochrome B561 [Source:VB Community Annotation]			GO:0005765,GO:0016020,GO:0016021,GO:0016491,GO:0031902,GO:0046872,GO:0055114	lysosomal membrane,membrane,integral component of membrane,oxidoreductase activity,late endosome membrane,metal ion binding,oxidation-reduction process
LOC110676490	99.2252	-1.02183	0.25819	-3.95765	7.56915e-05	0.000583155	AAEL028132
LOC5572603	183.505	1.52575	0.385604	3.95678	7.59656e-05	0.000584917	AAEL009927
LOC5568624	33.9716	2.36061	0.596675	3.95628	7.61267e-05	0.000585802	AAEL006962				GO:0030246	carbohydrate binding
LOC5575158	62.5322	2.33516	0.590264	3.95614	7.61715e-05	0.000585802	AAEL000341	basic helix-loop-helix protein [Source:VB Community Annotation]			GO:0046983	protein dimerization activity
LOC5572425	499.798	0.581559	0.147107	3.9533	7.70819e-05	0.000592449	AAEL023558				GO:0005319,GO:0005548,GO:0006869	lipid transporter activity,phospholipid transporter activity,lipid transport
LOC5569999	1690.56	-0.528438	0.133699	-3.95243	7.73615e-05	0.000594243	AAEL000181	polybromo-1 [Source:VB Community Annotation]			GO:0003677,GO:0003682,GO:0005515,GO:0005634,GO:0006338,GO:0016586	DNA binding,chromatin binding,protein binding,nucleus,chromatin remodeling,RSC-type complex
LOC5568631	91.1258	1.16408	0.294616	3.95117	7.7769e-05	0.000596835	AAEL006991				GO:0003676,GO:0008168,GO:0032259	nucleic acid binding,methyltransferase activity,methylation
LOC5576538	2533.19	-0.542842	0.13739	-3.9511	7.77916e-05	0.000596835	AAEL020236				GO:0008270,GO:0016567,GO:0016740,GO:0046872,GO:0061630,GO:0071596	zinc ion binding,protein ubiquitination,transferase activity,metal ion binding,ubiquitin protein ligase activity,ubiquitin-dependent protein catabolic process via the N-end rule pathway
LOC5565618	259.493	0.943965	0.238954	3.9504	7.80215e-05	0.000598243	AAEL021782				GO:0007165	signal transduction
LOC110676733	3406.88	0.770648	0.195222	3.94754	7.89576e-05	0.0006047	AAEL003685	Histone H3 [Source:UniProtKB/TrEMBL;Acc:Q16N56]			GO:0000786,GO:0003677,GO:0005634,GO:0046982	nucleosome,DNA binding,nucleus,protein heterodimerization activity
LOC5578783	3406.88	0.770648	0.195222	3.94754	7.89576e-05	0.0006047	AAEL019635	Histone H3 [Source:UniProtKB/TrEMBL;Acc:Q16N56]			GO:0000786,GO:0003677,GO:0005634,GO:0046982	nucleosome,DNA binding,nucleus,protein heterodimerization activity
LOC5576725	398.528	-1.30363	0.330301	-3.9468	7.9203e-05	0.000606061	AAEL002964	brain chitinase and chia [Source:VB Community Annotation]			GO:0005975,GO:0008061,GO:0030246	carbohydrate metabolic process,chitin binding,carbohydrate binding
LOC5572405	408.199	-0.821054	0.208035	-3.94672	7.92295e-05	0.000606061	AAEL009787
LOC5573489	859.263	0.619386	0.156968	3.94592	7.94927e-05	0.000607713	AAEL014505	succinate dehydrogenase, putative [Source:VB Community Annotation]			GO:0005739,GO:0005740,GO:0005743,GO:0006099,GO:0016020,GO:0016021,GO:0046872,GO:0055114	mitochondrion,mitochondrial envelope,mitochondrial inner membrane,tricarboxylic acid cycle,membrane,integral component of membrane,metal ion binding,oxidation-reduction process
LOC5563812	224.171	-1.43246	0.363251	-3.94344	8.03199e-05	0.000613672	AAEL014142	phosphatidylinositol synthase [Source:VB Community Annotation]			GO:0003881,GO:0005794,GO:0006629,GO:0008654,GO:0016020,GO:0016021,GO:0016740,GO:0016780	CDP-diacylglycerol-inositol 3-phosphatidyltransferase activity,Golgi apparatus,lipid metabolic process,phospholipid biosynthetic process,membrane,integral component of membrane,transferase activity,phosphotransferase activity, for other substituted phosphate groups
LOC5569074	509.109	0.596956	0.151391	3.94314	8.0423e-05	0.000613885	AAEL001210	NADH ubiquinone oxidoreductase subunit, putative [Source:VB Community Annotation]			GO:0005739,GO:0005743,GO:0005747,GO:0006120,GO:0016020,GO:0055114,GO:0070469	mitochondrion,mitochondrial inner membrane,mitochondrial respiratory chain complex I,mitochondrial electron transport, NADH to ubiquinone,membrane,oxidation-reduction process,respirasome
LOC5570985	90.4224	1.36144	0.345273	3.94308	8.04431e-05	0.000613885	AAEL010926				GO:0000981,GO:0000987,GO:0003677,GO:0005634,GO:0045944,GO:0046983	DNA-binding transcription factor activity, RNA polymerase II-specific,cis-regulatory region sequence-specific DNA binding,DNA binding,nucleus,positive regulation of transcription by RNA polymerase II,protein dimerization activity
LOC5572896	16.5821	3.78274	0.959638	3.94183	8.08606e-05	0.000616706	AAEL010102	tetraspanin, putative [Source:VB Community Annotation]			GO:0016020,GO:0016021	membrane,integral component of membrane
LOC5578342	1794.44	-0.530297	0.134605	-3.93966	8.15985e-05	0.000621965	AAEL003540				GO:0001510,GO:0008168,GO:0008171,GO:0008173,GO:0016740,GO:0032259	RNA methylation,methyltransferase activity,O-methyltransferase activity,RNA methyltransferase activity,transferase activity,methylation
LOC110675810	436.349	0.938392	0.238231	3.93901	8.18202e-05	0.000623286	AAEL009183	cytochrome oxidase biogenesis protein (oxa1 mitochondrial) [Source:VB Community Annotation]
LOC5567753	284.857	1.28681	0.326806	3.93752	8.23265e-05	0.000626772	AAEL000152				GO:0005737,GO:0030030	cytoplasm,cell projection organization
LOC110674691	1024.7	2.57148	0.653143	3.93709	8.24741e-05	0.000627524	AAEL020715
LOC5567422	1876.74	-0.412582	0.104833	-3.93562	8.2981e-05	0.000631008	AAEL006073	ubiquitin-conjugating enzyme E2-230k [Source:VB Community Annotation]
LOC5577174	359.245	-0.946626	0.240539	-3.93543	8.30466e-05	0.000631134	AAEL013058	mitochondrial peptide chain release factor [Source:VB Community Annotation]			GO:0003747,GO:0006412,GO:0006415	translation release factor activity,translation,translational termination
LOC110677185	352.423	1.06325	0.270301	3.93358	8.36894e-05	0.000635645	AAEL026154
LOC5578167	77.6409	-1.6174	0.411358	-3.93186	8.42895e-05	0.000639825	AAEL025514				GO:0004672,GO:0005085,GO:0005515,GO:0005524,GO:0006468	protein kinase activity,guanyl-nucleotide exchange factor activity,protein binding,ATP binding,protein phosphorylation
LOC5576496	211.823	1.99564	0.50766	3.93105	8.45769e-05	0.000641628	AAEL002907				GO:0006629	lipid metabolic process
LOC5570314	1151.01	0.926212	0.235725	3.9292	8.52292e-05	0.000646196	AAEL008250
LOC5567758	2354.92	-0.720353	0.183366	-3.92849	8.548e-05	0.000647712	AAEL000128	P130 [Source:VB Community Annotation]			GO:0005634,GO:0006357,GO:0007049,GO:0051726	nucleus,regulation of transcription by RNA polymerase II,cell cycle,regulation of cell cycle
LOC5577043	167.064	0.940295	0.239361	3.92835	8.55298e-05	0.000647712	AAEL026256				GO:0016020,GO:0016021	membrane,integral component of membrane
LOC110680950	42.534	1.45699	0.370994	3.92727	8.5916e-05	0.000650254	AAEL021401				GO:0005634	nucleus
LOC5573780	406.956	1.5742	0.400902	3.92664	8.6139e-05	0.000651559	AAEL000288				GO:0007165,GO:0008083	signal transduction,growth factor activity
LOC110681552	132.896	-1.10329	0.281032	-3.92585	8.64254e-05	0.000653341	AAEL023582				GO:0003676,GO:0005634,GO:0008270	nucleic acid binding,nucleus,zinc ion binding
LOC5564630	14.9987	2.82613	0.719933	3.92555	8.65323e-05	0.000653766	AAEL004383				GO:0004553,GO:0004563,GO:0005975,GO:0015929,GO:0016787,GO:0102148	hydrolase activity, hydrolyzing O-glycosyl compounds,beta-N-acetylhexosaminidase activity,carbohydrate metabolic process,hexosaminidase activity,hydrolase activity,N-acetyl-beta-D-galactosaminidase activity
LOC5573987	33.2087	-1.85284	0.472107	-3.92461	8.68692e-05	0.000655926	AAEL024583				GO:0016020,GO:0016021,GO:0045454	membrane,integral component of membrane,cell redox homeostasis
LOC5573435	520.944	-0.924618	0.235676	-3.92325	8.73607e-05	0.000659251	AAEL025393
LOC5568843	2238.68	0.511261	0.130421	3.92007	8.85249e-05	0.000667644	AAEL007162	autophagy related gene [Source:VB Community Annotation]	APG8		GO:0005737,GO:0006914,GO:0016020	cytoplasm,autophagy,membrane
LOC5578206	563.623	0.478604	0.122164	3.91771	8.93932e-05	0.000673799	AAEL003477	peptidyl-prolyl cis-trans isomerase h, ppih [Source:VB Community Annotation]			GO:0000413,GO:0003755,GO:0006457,GO:0016853	protein peptidyl-prolyl isomerization,peptidyl-prolyl cis-trans isomerase activity,protein folding,isomerase activity
LOC110677768	38.5801	-2.52693	0.645531	-3.91449	9.05955e-05	0.000682461	AAEL026225
LOC5565844	374.983	-0.565112	0.144385	-3.91392	9.08089e-05	0.000683669	AAEL005033				GO:0003676,GO:0005634,GO:0008270,GO:0046872	nucleic acid binding,nucleus,zinc ion binding,metal ion binding
LOC23687678	2305.57	0.458809	0.117279	3.91212	9.14909e-05	0.000688401	AAEL017258				GO:0016020,GO:0016021	membrane,integral component of membrane
LOC5564560	668.992	-1.02344	0.261761	-3.90984	9.23561e-05	0.000694505	AAEL004318
LOC5569127	50.0873	1.74145	0.445448	3.90944	9.25112e-05	0.000695265	AAEL007386				GO:0005267,GO:0006811,GO:0006813,GO:0016020,GO:0016021,GO:0071805	potassium channel activity,ion transport,potassium ion transport,membrane,integral component of membrane,potassium ion transmembrane transport
LOC110681198	238.906	-0.689187	0.176304	-3.90908	9.26486e-05	0.000695891	AAEL020539				GO:0003824,GO:0004571,GO:0005509,GO:0016020	catalytic activity,mannosyl-oligosaccharide 1,2-alpha-mannosidase activity,calcium ion binding,membrane
LOC5568491	615.959	-1.06147	0.271584	-3.90843	9.28985e-05	0.000697362	AAEL006904				GO:0016020,GO:0016021	membrane,integral component of membrane
LOC5580253	509.197	-0.571965	0.146347	-3.90828	9.29553e-05	0.000697381	AAEL012547	lkb1 interacting protein [Source:VB Community Annotation]			GO:0005515,GO:0005737	protein binding,cytoplasm
LOC5574653	1727.18	-0.548232	0.140327	-3.90681	9.3522e-05	0.000701224	AAEL011287	ubiquitin specific protease [Source:VB Community Annotation]			GO:0004843,GO:0006508,GO:0006511,GO:0008233,GO:0016579,GO:0036459	thiol-dependent ubiquitin-specific protease activity,proteolysis,ubiquitin-dependent protein catabolic process,peptidase activity,protein deubiquitination,thiol-dependent ubiquitinyl hydrolase activity
LOC5574050	1040.17	1.0594	0.271208	3.90621	9.37544e-05	0.000702558	AAEL010898				GO:0016020,GO:0016021	membrane,integral component of membrane
LOC5576319	328.369	1.20933	0.309661	3.90532	9.40996e-05	0.000704734	AAEL000405	odd Oz protein [Source:VB Community Annotation]			GO:0005886,GO:0016020	plasma membrane,membrane
LOC110678374	12.2092	3.05176	0.78159	3.90456	9.43979e-05	0.000705899	AAEL023751
LOC110680473	74.967	-1.35598	0.347284	-3.90452	9.44109e-05	0.000705899	AAEL020891
LOC5574862	884.35	0.551578	0.141267	3.9045	9.44196e-05	0.000705899	AAEL011468	protein kinase C inhibitor, putative [Source:VB Community Annotation]			GO:0003824	catalytic activity
LOC5580033	2498.96	-0.742432	0.190235	-3.90272	9.51182e-05	0.000710709	AAEL010229				GO:0016020,GO:0016021	membrane,integral component of membrane
LOC5575647	21.3518	2.10615	0.539739	3.90216	9.53364e-05	0.000711926	AAEL011980
[truncated: 17,536 more rows]
