# Supplementary material for: Engineered Antiviral Sensor Targets Infected Mosquitoes
Source: bioRxiv preprint, doi:10.1101/2023.01.27.525922, version 1 (2023-01-27)
Supplement: Table S15 [file 525922_file17.xlsx]

## Sheet: Sheet1
NCBI_ID	baseMean	log2FoldChange	lfcSE	stat	pvalue	padj	AAEL_ID	gene_description	gene_name	gene_synomym	GO_ID	GO_name
LOC5574403	7568.42	-2.1634	0.152449	-14.191	1.04169e-45	1.40691e-41	AAEL011129	alcohol dehydrogenase [Source:VB Community Annotation]			GO:0008270,GO:0016491,GO:0046872,GO:0055114	zinc ion binding,oxidoreductase activity,metal ion binding,oxidation-reduction process
LOC5564649	6582.43	-1.52105	0.127157	-11.962	5.61639e-33	3.79275e-29	AAEL004367				GO:0004553,GO:0005975,GO:0008152,GO:0016787,GO:0016798	hydrolase activity, hydrolyzing O-glycosyl compounds,carbohydrate metabolic process,metabolic process,hydrolase activity,hydrolase activity, acting on glycosyl bonds
LOC5567015	17271.8	-1.77311	0.158584	-11.1809	5.05837e-29	2.27728e-25	AAEL005749	lysosomal alpha-mannosidase (mannosidase alpha class 2b member 1) [Source:VB Community Annotation]			GO:0003824,GO:0004559,GO:0005975,GO:0006013,GO:0008152,GO:0016787,GO:0016798,GO:0030246,GO:0046872	catalytic activity,alpha-mannosidase activity,carbohydrate metabolic process,mannose metabolic process,metabolic process,hydrolase activity,hydrolase activity, acting on glycosyl bonds,carbohydrate binding,metal ion binding
LOC5577763	4663.25	-3.22389	0.297151	-10.8494	2.00849e-27	6.78165e-24	AAEL003317	alkaline phosphatase [Source:VB Community Annotation]			GO:0003824,GO:0004035,GO:0016311,GO:0016787,GO:0016791,GO:0031225	catalytic activity,alkaline phosphatase activity,dephosphorylation,hydrolase activity,phosphatase activity,anchored component of membrane
LOC5574940	121.928	-4.08867	0.379161	-10.7835	4.12072e-27	1.11309e-23	AAEL011559	metalloproteinase, putative [Source:VB Community Annotation]			GO:0004222,GO:0006508,GO:0008233,GO:0008237,GO:0008270,GO:0016787,GO:0046872	metalloendopeptidase activity,proteolysis,peptidase activity,metallopeptidase activity,zinc ion binding,hydrolase activity,metal ion binding
LOC5566116	2876.6	-1.08816	0.104511	-10.4119	2.18856e-25	4.92646e-22	AAEL005174
LOC5567288	472.319	-3.50162	0.337873	-10.3637	3.62596e-25	6.99604e-22	AAEL020376				GO:0005247,GO:0006811,GO:0006821,GO:0016020,GO:0016021,GO:0055085,GO:1902476	voltage-gated chloride channel activity,ion transport,chloride transport,membrane,integral component of membrane,transmembrane transport,chloride transmembrane transport
LOC5564618	3834.26	-1.44966	0.141683	-10.2317	1.43022e-24	2.41457e-21	AAEL014541	maltose phosphorylase [Source:VB Community Annotation]			GO:0003824,GO:0005975	catalytic activity,carbohydrate metabolic process
LOC5567473	678.907	-2.99579	0.29598	-10.1216	4.43189e-24	6.65079e-21	AAEL000931	Alkaline phosphatase [Source:UniProtKB/TrEMBL;Acc:Q1HQK7]			GO:0003824,GO:0004035,GO:0016311,GO:0016787,GO:0016791,GO:0031225	catalytic activity,alkaline phosphatase activity,dephosphorylation,hydrolase activity,phosphatase activity,anchored component of membrane
LOC110674150	223.269	2.39816	0.246089	9.7451	1.93595e-22	2.61469e-19	AAEL017975	heat shock protein HSP70 [Source:VB Community Annotation]	HSP70Ba
LOC110674148	189.165	2.34862	0.242565	9.68246	3.57983e-22	4.39537e-19	AAEL027610				GO:0000166,GO:0005524	nucleotide binding,ATP binding
LOC5572566	778.161	2.08017	0.216113	9.6254	6.24664e-22	7.0306e-19	AAEL009888	sodium-coupled cation-chloride cotransporter [Source:VB Community Annotation]	CCC2		GO:0006811,GO:0015293,GO:0015377,GO:0016020,GO:0016021,GO:0022857,GO:0055085,GO:1902476	ion transport,symporter activity,cation:chloride symporter activity,membrane,integral component of membrane,transmembrane transporter activity,transmembrane transport,chloride transmembrane transport
LOC5574915	3514.25	2.30558	0.245376	9.3961	5.66222e-21	5.88261e-18	AAEL011520	sucrose transport protein [Source:VB Community Annotation]			GO:0016020,GO:0016021,GO:0022857,GO:0055085	membrane,integral component of membrane,transmembrane transporter activity,transmembrane transport
LOC5577759	442.23	-5.27233	0.580245	-9.08639	1.02381e-19	9.46111e-17	AAEL003289	alkaline phosphatase [Source:VB Community Annotation]			GO:0003824,GO:0004035,GO:0016311,GO:0016787,GO:0016791,GO:0031225	catalytic activity,alkaline phosphatase activity,dephosphorylation,hydrolase activity,phosphatase activity,anchored component of membrane
LOC5569086	1263.62	-1.10748	0.121921	-9.08356	1.05077e-19	9.46111e-17	AAEL001220	myosin-VIIa (Protein crinkled) [Source:VB Community Annotation]	ck		GO:0000166,GO:0003774,GO:0003779,GO:0005515,GO:0005524,GO:0005737,GO:0005856,GO:0007605,GO:0008407,GO:0016459,GO:0030048,GO:0030898,GO:0032027,GO:0035317,GO:0048800,GO:0051015	nucleotide binding,motor activity,actin binding,protein binding,ATP binding,cytoplasm,cytoskeleton,sensory perception of sound,chaeta morphogenesis,myosin complex,actin filament-based movement,actin-dependent ATPase activity,myosin light chain binding,imaginal disc-derived wing hair organization,antennal morphogenesis,actin filament binding
LOC110674151	182.705	2.1986	0.246105	8.93358	4.12426e-19	3.39405e-16	AAEL017976	heat shock protein HSP70 [Source:VB Community Annotation]	HSP70Bb
LOC5566868	1267	-1.14422	0.128137	-8.92969	4.27209e-19	3.39405e-16	AAEL000800	microsomal dipeptidase [Source:VB Community Annotation]			GO:0006508,GO:0008233,GO:0008235,GO:0008237,GO:0008239,GO:0016020,GO:0016787,GO:0016805,GO:0031225,GO:0046872,GO:0070573	proteolysis,peptidase activity,metalloexopeptidase activity,metallopeptidase activity,dipeptidyl-peptidase activity,membrane,hydrolase activity,dipeptidase activity,anchored component of membrane,metal ion binding,metallodipeptidase activity
LOC5577707	63.9076	4.72966	0.531253	8.90285	5.44289e-19	3.68076e-16	AAEL013350	heat shock protein 26kD, putative [Source:VB Community Annotation]			GO:0046872	metal ion binding
LOC110676362	48.7602	-4.42867	0.497453	-8.9027	5.45056e-19	3.68076e-16	AAEL003079	glucosyl/glucuronosyl transferases [Source:VB Community Annotation]			GO:0016758	transferase activity, transferring hexosyl groups
LOC5576969	48.7602	-4.42867	0.497453	-8.9027	5.45056e-19	3.68076e-16	AAEL021590				GO:0008194,GO:0015020,GO:0016020,GO:0016021,GO:0016740,GO:0016757,GO:0016758	UDP-glycosyltransferase activity,glucuronosyltransferase activity,membrane,integral component of membrane,transferase activity,transferase activity, transferring glycosyl groups,transferase activity, transferring hexosyl groups
LOC5580175	1052.89	-2.39581	0.276756	-8.65677	4.85313e-18	3.12125e-15	AAEL002555	sodium/solute symporter [Source:VB Community Annotation]			GO:0016020,GO:0016021,GO:0022857,GO:0055085	membrane,integral component of membrane,transmembrane transporter activity,transmembrane transport
LOC5577760	200.746	-5.18026	0.608073	-8.51915	1.60734e-17	9.86762e-15	AAEL003297	alkaline phosphatase [Source:VB Community Annotation]			GO:0003824,GO:0004035,GO:0016311,GO:0016787,GO:0016791,GO:0031225	catalytic activity,alkaline phosphatase activity,dephosphorylation,hydrolase activity,phosphatase activity,anchored component of membrane
LOC5569114	10585.2	-3.611	0.425289	-8.49071	2.05377e-17	1.20601e-14	AAEL007377	ammonium transporter [Source:VB Community Annotation]			GO:0008519,GO:0015696,GO:0016020,GO:0016021,GO:0072488	ammonium transmembrane transporter activity,ammonium transport,membrane,integral component of membrane,ammonium transmembrane transport
LOC5580113	678.253	-1.10386	0.130136	-8.48241	2.2058e-17	1.24132e-14	AAEL020441				GO:0004067,GO:0006508,GO:0008798,GO:0016787	asparaginase activity,proteolysis,beta-aspartyl-peptidase activity,hydrolase activity
LOC5578181	440.014	-1.93005	0.232265	-8.30967	9.59673e-17	5.18454e-14	AAEL013554	cytochrome P450 [Source:VB Community Annotation]	CYP4J14		GO:0004497,GO:0005506,GO:0005789,GO:0016020,GO:0016021,GO:0016491,GO:0016705,GO:0020037,GO:0031090,GO:0046872,GO:0055114	monooxygenase activity,iron ion binding,endoplasmic reticulum membrane,membrane,integral component of membrane,oxidoreductase activity,oxidoreductase activity, acting on paired donors, with incorporation or reduction of molecular oxygen,heme binding,organelle membrane,metal ion binding,oxidation-reduction process
LOC5569553	2584.68	1.27371	0.154035	8.26895	1.35145e-16	7.02025e-14	AAEL007758				GO:0016020,GO:0016021	membrane,integral component of membrane
LOC5570209	16810.4	-0.936107	0.118408	-7.90579	2.66247e-15	1.33183e-12	AAEL008162	protease m1 zinc metalloprotease [Source:VB Community Annotation]			GO:0004177,GO:0006508,GO:0008233,GO:0008237,GO:0008270,GO:0016787,GO:0046872	aminopeptidase activity,proteolysis,peptidase activity,metallopeptidase activity,zinc ion binding,hydrolase activity,metal ion binding
LOC5569755	922.39	-1.42586	0.181587	-7.85221	4.08764e-15	1.9717e-12	AAEL007892	xaa-pro aminopeptidase [Source:VB Community Annotation]			GO:0006508,GO:0016787,GO:0046872,GO:0070006	proteolysis,hydrolase activity,metal ion binding,metalloaminopeptidase activity
LOC5575859	36.9372	-3.89486	0.501694	-7.76342	8.26683e-15	3.85006e-12	AAEL012128	cationic amino acid transporter [Source:VB Community Annotation]			GO:0016020,GO:0016021,GO:0022857,GO:0055085	membrane,integral component of membrane,transmembrane transporter activity,transmembrane transport
LOC110675912	126.943	-1.71322	0.221788	-7.72456	1.1224e-14	5.05305e-12	AAEL022575
LOC5567219	1404.73	-0.789791	0.102444	-7.70951	1.26298e-14	5.50251e-12	AAEL000904	Carboxylic ester hydrolase [Source:UniProtKB/TrEMBL;Acc:A0A1S4EX74]			GO:0016787,GO:0052689	hydrolase activity,carboxylic ester hydrolase activity
LOC5571381	1539.89	-1.08135	0.140835	-7.67812	1.61445e-14	6.81397e-12	AAEL025929				GO:0004364,GO:0005515,GO:0005737	glutathione transferase activity,protein binding,cytoplasm
LOC5570640	654.545	-1.02173	0.134364	-7.60416	2.86759e-14	1.17362e-11	AAEL008456	alpha-amylase [Source:VB Community Annotation]			GO:0003824,GO:0004556,GO:0005975,GO:0008152,GO:0016787,GO:0016798,GO:0043169,GO:0046872,GO:0103025	catalytic activity,alpha-amylase activity,carbohydrate metabolic process,metabolic process,hydrolase activity,hydrolase activity, acting on glycosyl bonds,cation binding,metal ion binding,alpha-amylase activity (releasing maltohexaose)
LOC5571549	771.807	-2.07753	0.276104	-7.52442	5.29532e-14	2.10349e-11	AAEL009121	cytochrome P450 [Source:VB Community Annotation]	CYP6N9		GO:0004497,GO:0005506,GO:0016491,GO:0016705,GO:0020037,GO:0043231,GO:0046872,GO:0055114	monooxygenase activity,iron ion binding,oxidoreductase activity,oxidoreductase activity, acting on paired donors, with incorporation or reduction of molecular oxygen,heme binding,intracellular membrane-bounded organelle,metal ion binding,oxidation-reduction process
LOC5565972	3494.85	-1.12431	0.15206	-7.39382	1.42671e-13	5.50546e-11	AAEL015020	glycoside hydrolases [Source:VB Community Annotation]			GO:0004553,GO:0005975,GO:0016020,GO:0016021	hydrolase activity, hydrolyzing O-glycosyl compounds,carbohydrate metabolic process,membrane,integral component of membrane
LOC5571589	1365.99	-1.77312	0.241054	-7.3557	1.89929e-13	7.12551e-11	AAEL009176	Gram-Negative Binding Protein (GNBP) or Beta-1 3-Glucan Binding Protein (BGBP). [Source:VB Community Annotation]	GNBPB3		GO:0004553,GO:0005975	hydrolase activity, hydrolyzing O-glycosyl compounds,carbohydrate metabolic process
LOC110675456	135.833	1.77245	0.242691	7.30334	2.80706e-13	1.02465e-10	AAEL021669
LOC5564828	86.9165	2.10333	0.28846	7.29161	3.06276e-13	1.08857e-10	AAEL025975
LOC5578348	826.607	0.931998	0.127925	7.2855	3.20483e-13	1.10986e-10	AAEL003548	sulphate transporter [Source:VB Community Annotation]			GO:0008271,GO:0008272,GO:0015116,GO:0016020,GO:0016021,GO:0055085,GO:1902358	secondary active sulfate transmembrane transporter activity,sulfate transport,sulfate transmembrane transporter activity,membrane,integral component of membrane,transmembrane transport,sulfate transmembrane transport
LOC5579094	110.552	2.19021	0.301249	7.27043	3.58332e-13	1.20991e-10	AAEL003832	defensin anti-microbial peptide [Source:VB Community Annotation]	DEFC		GO:0002376,GO:0005576,GO:0006952,GO:0042742,GO:0045087	immune system process,extracellular region,defense response,defense response to bacterium,innate immune response
LOC110677076	244.234	-1.38246	0.190476	-7.25795	3.92992e-13	1.29457e-10	AAEL023112
LOC5569113	182.121	-2.75081	0.385108	-7.14294	9.13554e-13	2.93773e-10	AAEL007378				GO:0016020,GO:0016021,GO:0022857,GO:0055085	membrane,integral component of membrane,transmembrane transporter activity,transmembrane transport
LOC5576915	701.12	1.31166	0.18537	7.07593	1.48451e-12	4.66275e-10	AAEL012866				GO:0008080	N-acetyltransferase activity
LOC5576623	224.891	-8.06411	1.14585	-7.03768	1.95468e-12	5.99999e-10	AAEL012648				GO:0005576,GO:0006030,GO:0008061	extracellular region,chitin metabolic process,chitin binding
LOC5573113	46.6642	-3.40628	0.484945	-7.02405	2.15523e-12	6.46857e-10	AAEL002005	cytochrome P450 [Source:VB Community Annotation]	CYP12F6		GO:0004497,GO:0005506,GO:0016705,GO:0020037,GO:0055114	monooxygenase activity,iron ion binding,oxidoreductase activity, acting on paired donors, with incorporation or reduction of molecular oxygen,heme binding,oxidation-reduction process
LOC5579014	274.321	-1.49145	0.212739	-7.01073	2.37074e-12	6.9607e-10	AAEL003810	sugar transporter [Source:VB Community Annotation]			GO:0016020,GO:0016021,GO:0022857,GO:0055085	membrane,integral component of membrane,transmembrane transporter activity,transmembrane transport
LOC5563718	995.795	-2.46301	0.352922	-6.9789	2.97497e-12	8.54892e-10	AAEL003905	alkaline phosphatase [Source:VB Community Annotation]			GO:0003824,GO:0004035,GO:0016311,GO:0016787,GO:0016791,GO:0031225	catalytic activity,alkaline phosphatase activity,dephosphorylation,hydrolase activity,phosphatase activity,anchored component of membrane
LOC5576972	72.6371	2.00028	0.286867	6.97285	3.10574e-12	8.73877e-10	AAEL003076	glucosyl/glucuronosyl transferases [Source:VB Community Annotation]			GO:0008194,GO:0016020,GO:0016021,GO:0016740,GO:0016757,GO:0016758	UDP-glycosyltransferase activity,membrane,integral component of membrane,transferase activity,transferase activity, transferring glycosyl groups,transferase activity, transferring hexosyl groups
LOC5579163	108.125	-1.64593	0.23662	-6.95602	3.50018e-12	9.64765e-10	AAEL003869
LOC5568174	61.2685	2.1233	0.307705	6.90045	5.18367e-12	1.40021e-09	AAEL006630				GO:0016301,GO:0016310	kinase activity,phosphorylation
LOC5575514	380.861	-0.896699	0.130157	-6.88934	5.6052e-12	1.48439e-09	AAEL011892	receptor for activated C kinase, putative [Source:VB Community Annotation]			GO:0005515	protein binding
LOC5575519	1099.07	-1.20767	0.175387	-6.88575	5.74839e-12	1.49303e-09	AAEL024295				GO:0003841,GO:0006629,GO:0008654,GO:0016020,GO:0016740,GO:0016746	1-acylglycerol-3-phosphate O-acyltransferase activity,lipid metabolic process,phospholipid biosynthetic process,membrane,transferase activity,transferase activity, transferring acyl groups
LOC5573163	344.199	1.26837	0.186184	6.81246	9.59437e-12	2.44493e-09	AAEL002038	protein serine/threonine kinase, putative [Source:VB Community Annotation]
LOC5563591	4641.32	-1.0755	0.15849	-6.78591	1.15361e-11	2.8853e-09	AAEL000006	phosphoenolpyruvate carboxykinase [Source:VB Community Annotation]			GO:0000166,GO:0004611,GO:0004613,GO:0005525,GO:0006094,GO:0016829,GO:0016831,GO:0017076,GO:0046872	nucleotide binding,phosphoenolpyruvate carboxykinase activity,phosphoenolpyruvate carboxykinase (GTP) activity,GTP binding,gluconeogenesis,lyase activity,carboxy-lyase activity,purine nucleotide binding,metal ion binding
LOC110676872	405.053	-1.04991	0.155432	-6.75476	1.43076e-11	3.51343e-09	AAEL024353
LOC5575705	241.314	-3.93019	0.58554	-6.71207	1.91876e-11	4.62764e-09	AAEL012013				GO:0005576,GO:0008061	extracellular region,chitin binding
LOC5567814	1163.47	-1.25	0.1874	-6.67025	2.55362e-11	6.05073e-09	AAEL018150				GO:0016020,GO:0016021,GO:0022857,GO:0055085	membrane,integral component of membrane,transmembrane transporter activity,transmembrane transport
LOC5570648	728.256	1.39101	0.208763	6.66313	2.68065e-11	6.24223e-09	AAEL008468	cysteine synthase [Source:VB Community Annotation]			GO:0004122,GO:0005737,GO:0006535,GO:0008652,GO:0016829,GO:0019343,GO:0019344	cystathionine beta-synthase activity,cytoplasm,cysteine biosynthetic process from serine,cellular amino acid biosynthetic process,lyase activity,cysteine biosynthetic process via cystathionine,cysteine biosynthetic process
LOC5564757	629.578	-1.39102	0.209656	-6.6348	3.24948e-11	7.43855e-09	AAEL014604	cytochrome P450 [Source:VB Community Annotation]			GO:0004497,GO:0005506,GO:0016020,GO:0016021,GO:0016491,GO:0016705,GO:0020037,GO:0046872,GO:0055114	monooxygenase activity,iron ion binding,membrane,integral component of membrane,oxidoreductase activity,oxidoreductase activity, acting on paired donors, with incorporation or reduction of molecular oxygen,heme binding,metal ion binding,oxidation-reduction process
LOC5578869	139.86	-2.4747	0.37401	-6.61668	3.67362e-11	8.26933e-09	AAEL003740				GO:0005515	protein binding
LOC5563977	711.627	0.742632	0.113037	6.56981	5.0378e-11	1.11542e-08	AAEL004017	DNA polymerase v [Source:VB Community Annotation]			GO:0003677,GO:0005634,GO:0005730,GO:0006355,GO:0008134	DNA binding,nucleus,nucleolus,regulation of transcription, DNA-templated,transcription factor binding
LOC5575865	1296.66	-0.899824	0.137424	-6.54777	5.84019e-11	1.27222e-08	AAEL012135	Galectin [Source:UniProtKB/TrEMBL;Acc:Q16MZ7]	GALE2		GO:0030246	carbohydrate binding
LOC5574723	408.353	0.829761	0.126811	6.54329	6.0179e-11	1.2812e-08	AAEL011357	maintenance of killer 16 (mak16) protein [Source:VB Community Annotation]			GO:0005634	nucleus
LOC110674152	46.2447	2.41631	0.369355	6.54198	6.07114e-11	1.2812e-08	AAEL020330				GO:0000166,GO:0005524	nucleotide binding,ATP binding
LOC5575902	251.482	-2.51209	0.38414	-6.53953	6.17144e-11	1.28233e-08	AAEL012148
LOC110676887	400.342	-1.65334	0.253185	-6.53014	6.57088e-11	1.34464e-08	AAEL020366
LOC5566871	493.113	-1.07507	0.165407	-6.49954	8.0565e-11	1.62405e-08	AAEL000845	Protein-tyrosine phosphatase [Source:UniProtKB/TrEMBL;Acc:A0A1S4EX19]			GO:0004721,GO:0004725,GO:0005515,GO:0006470,GO:0016020,GO:0016021,GO:0016311,GO:0016787,GO:0016791,GO:0035335	phosphoprotein phosphatase activity,protein tyrosine phosphatase activity,protein binding,protein dephosphorylation,membrane,integral component of membrane,dephosphorylation,hydrolase activity,phosphatase activity,peptidyl-tyrosine dephosphorylation
LOC5572246	1787.16	-0.776803	0.119743	-6.48723	8.74284e-11	1.73648e-08	AAEL009689	serine protease [Source:VB Community Annotation]			GO:0004252,GO:0006508,GO:0008233,GO:0008236,GO:0016787	serine-type endopeptidase activity,proteolysis,peptidase activity,serine-type peptidase activity,hydrolase activity
LOC5577712	28.7809	4.37788	0.67707	6.46591	1.00691e-10	1.97091e-08	AAEL013345	alphaA-crystallin, putative [Source:VB Community Annotation]			GO:0046872	metal ion binding
LOC5573677	154.17	-1.60886	0.251203	-6.40462	1.50743e-10	2.90848e-08	AAEL010656	leucine-rich immune protein (Short) [Source:VB Community Annotation]	LRIM12		GO:0005515	protein binding
LOC110676766	660.611	2.97526	0.467922	6.35844	2.03809e-10	3.87696e-08	AAEL021154
LOC5577193	4891.29	1.09213	0.172449	6.33309	2.40305e-10	4.45352e-08	AAEL013075				GO:0000413,GO:0003755,GO:0016853	protein peptidyl-prolyl isomerization,peptidyl-prolyl cis-trans isomerase activity,isomerase activity
LOC5571710	927.959	-0.950712	0.150163	-6.33122	2.43232e-10	4.45352e-08	AAEL015573	glycoside hydrolases [Source:VB Community Annotation]			GO:0004553,GO:0005975	hydrolase activity, hydrolyzing O-glycosyl compounds,carbohydrate metabolic process
LOC5568333	2254.28	-0.832247	0.131462	-6.33073	2.4401e-10	4.45352e-08	AAEL021491				GO:0008270	zinc ion binding
LOC5566508	147.644	1.55171	0.245259	6.32682	2.50269e-10	4.50685e-08	AAEL005431	Clip-Domain Serine Protease family B. [Source:VB Community Annotation]	CLIPB37		GO:0004252,GO:0006508,GO:0008233,GO:0008236,GO:0016787	serine-type endopeptidase activity,proteolysis,peptidase activity,serine-type peptidase activity,hydrolase activity
LOC5572673	9727.34	-0.917723	0.145345	-6.31412	2.71703e-10	4.82845e-08	AAEL009948	aldehyde dehydrogenase [Source:VB Community Annotation]	ALDH9948	ALDH	GO:0016491,GO:0016620,GO:0055114	oxidoreductase activity,oxidoreductase activity, acting on the aldehyde or oxo group of donors, NAD or NADP as acceptor,oxidation-reduction process
LOC110676139	2233.46	1.51073	0.239966	6.29562	3.06171e-10	5.37031e-08	AAEL026446
LOC5563703	188.956	1.17338	0.186685	6.28536	3.27089e-10	5.66367e-08	AAEL000554	fasciclin, putative [Source:VB Community Annotation]
LOC5577910	1939.56	1.10317	0.175691	6.27905	3.40653e-10	5.78789e-08	AAEL003352	60S ribosomal protein l7ae [Source:VB Community Annotation]	RpL7ae		GO:0003723,GO:0005634,GO:0005730,GO:0005840,GO:0042254,GO:1990904	RNA binding,nucleus,nucleolus,ribosome,ribosome biogenesis,ribonucleoprotein complex
LOC5566858	39.346	2.68216	0.427228	6.27806	3.42834e-10	5.78789e-08	AAEL000813	dimethylaniline monooxygenase [Source:VB Community Annotation]			GO:0004497,GO:0004499,GO:0016491,GO:0050660,GO:0050661,GO:0055114	monooxygenase activity,N,N-dimethylaniline monooxygenase activity,oxidoreductase activity,flavin adenine dinucleotide binding,NADP binding,oxidation-reduction process
LOC5574400	729.625	-1.12346	0.179559	-6.25675	3.93083e-10	6.55429e-08	AAEL011112	alcohol dehydrogenase [Source:VB Community Annotation]			GO:0008270,GO:0016491,GO:0046872,GO:0055114	zinc ion binding,oxidoreductase activity,metal ion binding,oxidation-reduction process
LOC5573080	1128.01	-1.07057	0.171324	-6.24877	4.137e-10	6.7503e-08	AAEL010266
LOC110675781	527.622	-1.7457	0.279387	-6.24834	4.14834e-10	6.7503e-08	AAEL009968				GO:0000166,GO:0009166,GO:0016787,GO:0016788,GO:0046872	nucleotide binding,nucleotide catabolic process,hydrolase activity,hydrolase activity, acting on ester bonds,metal ion binding
LOC5571116	477.447	-2.09125	0.334873	-6.24491	4.24035e-10	6.81788e-08	AAEL001514				GO:0005576,GO:0006030,GO:0008061	extracellular region,chitin metabolic process,chitin binding
LOC110678164	109.964	-4.06077	0.65087	-6.23898	4.40423e-10	6.97917e-08	AAEL027398
LOC5572468	834.856	-2.99022	0.479389	-6.23758	4.44402e-10	6.97917e-08	AAEL001833	juvenile hormone-inducible protein, putative [Source:VB Community Annotation]
LOC110673997	729.445	-1.12141	0.18006	-6.228	4.72423e-10	7.33395e-08	AAEL024696
LOC5570405	137.57	3.00107	0.48498	6.18803	6.09219e-10	9.26295e-08	AAEL008313
LOC5568089	1978.23	0.590776	0.0954756	6.18772	6.10397e-10	9.26295e-08	AAEL006519				GO:0016020,GO:0016021	membrane,integral component of membrane
EGFP	1682.07	5.78333	0.935899	6.17943	6.43328e-10	9.56741e-08
LOC5567680	51.601	-3.45627	0.559347	-6.17911	6.44628e-10	9.56741e-08	AAEL006259	long wavelength sensitive opsin [Source:VB Community Annotation]	GPROP2		GO:0004930,GO:0007165,GO:0007186,GO:0007601,GO:0007602,GO:0009881,GO:0016020,GO:0016021,GO:0018298,GO:0050896	G protein-coupled receptor activity,signal transduction,G protein-coupled receptor signaling pathway,visual perception,phototransduction,photoreceptor activity,membrane,integral component of membrane,protein-chromophore linkage,response to stimulus
LOC5571709	13610.9	-0.95011	0.153956	-6.17133	6.77174e-10	9.9412e-08	AAEL015021	glycoside hydrolases [Source:VB Community Annotation]			GO:0004553,GO:0005975,GO:0008152,GO:0016787,GO:0016798	hydrolase activity, hydrolyzing O-glycosyl compounds,carbohydrate metabolic process,metabolic process,hydrolase activity,hydrolase activity, acting on glycosyl bonds
LOC110676144	177.964	1.82575	0.296991	6.14748	7.8724e-10	1.14328e-07	AAEL025773
LOC5579909	73.7	-2.72323	0.445082	-6.11849	9.44689e-10	1.35734e-07	AAEL024627
LOC110680238	621.327	-1.61782	0.264569	-6.11493	9.6597e-10	1.3733e-07	AAEL022879				GO:0004553,GO:0005975	hydrolase activity, hydrolyzing O-glycosyl compounds,carbohydrate metabolic process
LOC23687871	663.131	0.840765	0.137727	6.10457	1.03081e-09	1.45022e-07	AAEL017451	Angiotensin-converting enzyme [Source:UniProtKB/TrEMBL;Acc:J9HF68]			GO:0004180,GO:0006508,GO:0008233,GO:0008237,GO:0008241,GO:0016020,GO:0016787,GO:0046872	carboxypeptidase activity,proteolysis,peptidase activity,metallopeptidase activity,peptidyl-dipeptidase activity,membrane,hydrolase activity,metal ion binding
LOC5570295	1981.06	-0.882565	0.144917	-6.09015	1.12803e-09	1.57063e-07	AAEL008232	sugar transporter [Source:VB Community Annotation]			GO:0016020,GO:0016021,GO:0022857,GO:0055085	membrane,integral component of membrane,transmembrane transporter activity,transmembrane transport
LOC5564508	22.7468	5.48719	0.904691	6.06527	1.31735e-09	1.81552e-07	AAEL004271
LOC5570918	226.768	-3.36013	0.555652	-6.04719	1.47396e-09	2.01075e-07	AAEL001498
LOC5580324	128.29	-1.62396	0.268619	-6.04557	1.48879e-09	2.01075e-07	AAEL012903	sugar transporter [Source:VB Community Annotation]			GO:0016020,GO:0016021,GO:0022857,GO:0055085	membrane,integral component of membrane,transmembrane transporter activity,transmembrane transport
LOC5573303	139.579	2.64869	0.438404	6.04166	1.52539e-09	2.03979e-07	AAEL010393	ferritin subunit, putative [Source:VB Community Annotation]			GO:0004322,GO:0005623,GO:0006826,GO:0006879,GO:0008199,GO:0016491,GO:0046872,GO:0055114	ferroxidase activity,obsolete cell,iron ion transport,cellular iron ion homeostasis,ferric iron binding,oxidoreductase activity,metal ion binding,oxidation-reduction process
LOC110676201	585.507	-0.864811	0.143489	-6.02701	1.67024e-09	2.21159e-07	AAEL021375				GO:0004553,GO:0005975	hydrolase activity, hydrolyzing O-glycosyl compounds,carbohydrate metabolic process
LOC5574696	65.5038	-2.4001	0.399355	-6.00994	1.85593e-09	2.43362e-07	AAEL011337				GO:0005576,GO:0006030,GO:0008061	extracellular region,chitin metabolic process,chitin binding
LOC5576440	1666.37	-0.685568	0.114311	-5.9974	2.00496e-09	2.60375e-07	AAEL005536	tetraspanin 29fb [Source:VB Community Annotation]			GO:0016020,GO:0016021	membrane,integral component of membrane
LOC110678865	22.575	3.12575	0.521703	5.99143	2.07998e-09	2.67545e-07	AAEL028193
LOC5573002	538.179	0.922966	0.154639	5.96851	2.3943e-09	3.05069e-07	AAEL001917	ribosome biogenesis protein brix [Source:VB Community Annotation]
LOC5569780	8000.4	-0.781698	0.131376	-5.95007	2.6803e-09	3.38319e-07	AAEL007926	retinoid-inducible serine carboxypeptidase (serine carboxypeptidase [Source:VB Community Annotation]			GO:0004180,GO:0004185,GO:0006508,GO:0008233,GO:0016787	carboxypeptidase activity,serine-type carboxypeptidase activity,proteolysis,peptidase activity,hydrolase activity
LOC5568369	137.794	1.3904	0.234043	5.94079	2.8365e-09	3.5472e-07	AAEL001087	synaptic vesicle protein [Source:VB Community Annotation]			GO:0016020,GO:0016021,GO:0022857,GO:0055085	membrane,integral component of membrane,transmembrane transporter activity,transmembrane transport
LOC5567626	88.0552	-1.61149	0.271933	-5.92604	3.10336e-09	3.84532e-07	AAEL024532				GO:0005515	protein binding
LOC110675612	10056.3	-1.4411	0.243842	-5.90997	3.42179e-09	4.20133e-07	AAEL022334
LOC110681396	21.9235	3.07824	0.526688	5.84451	5.08052e-09	6.18176e-07	AAEL027220
LOC5573419	703.343	1.1132	0.190606	5.84034	5.20947e-09	6.28206e-07	AAEL008406	cationic amino acid transporter [Source:VB Community Annotation]			GO:0016020,GO:0016021,GO:0022857,GO:0055085	membrane,integral component of membrane,transmembrane transporter activity,transmembrane transport
LOC5575311	9182.49	-0.82621	0.141813	-5.82607	5.67477e-09	6.78261e-07	AAEL002588				GO:0005576,GO:0006030,GO:0008061	extracellular region,chitin metabolic process,chitin binding
LOC5570824	7108.61	-0.829518	0.142788	-5.80943	6.26845e-09	7.42647e-07	AAEL008600	zinc carboxypeptidase [Source:VB Community Annotation]			GO:0004180,GO:0004181,GO:0006508,GO:0008233,GO:0008237,GO:0008270,GO:0016787,GO:0046872	carboxypeptidase activity,metallocarboxypeptidase activity,proteolysis,peptidase activity,metallopeptidase activity,zinc ion binding,hydrolase activity,metal ion binding
LOC5572209	2662.57	-1.59175	0.275488	-5.77791	7.5634e-09	8.79819e-07	AAEL009601	pyridoxine kinase [Source:VB Community Annotation]			GO:0008478,GO:0009443,GO:0016310	pyridoxal kinase activity,pyridoxal 5'-phosphate salvage,phosphorylation
LOC110681120	990.17	-1.62946	0.282078	-5.77662	7.62171e-09	8.79819e-07	AAEL028198	Carboxylic ester hydrolase (Fragment) [Source:UniProtKB/TrEMBL;Acc:Q17G40]
LOC5577515	990.17	-1.62946	0.282078	-5.77662	7.62171e-09	8.79819e-07	AAEL028198	Carboxylic ester hydrolase (Fragment) [Source:UniProtKB/TrEMBL;Acc:Q17G40]			GO:0016787,GO:0052689	hydrolase activity,carboxylic ester hydrolase activity
LOC5574186	61.6341	-3.12429	0.541106	-5.77389	7.74621e-09	8.86613e-07	AAEL002291				GO:0005509,GO:0007154,GO:0016020	calcium ion binding,cell communication,membrane
LOC5568623	364.805	1.15628	0.200633	5.76316	8.2553e-09	9.3614e-07	AAEL006971				GO:0030246	carbohydrate binding
LOC5569637	577.94	0.786387	0.136481	5.76189	8.31755e-09	9.3614e-07	AAEL007778	leucine-rich transmembrane protein [Source:VB Community Annotation]			GO:0005515,GO:0016020,GO:0016021	protein binding,membrane,integral component of membrane
LOC110680290	28.4547	2.42531	0.421929	5.74814	9.02295e-09	1.00714e-06	AAEL022167				GO:0003676	nucleic acid binding
LOC5567332	269.313	-1.32352	0.230704	-5.73688	9.64363e-09	1.0676e-06	AAEL022793				GO:0004842,GO:0016567	ubiquitin-protein transferase activity,protein ubiquitination
LOC5569536	1152.22	-1.55413	0.27254	-5.7024	1.18134e-08	1.29717e-06	AAEL007711				GO:0005576,GO:0006030,GO:0008061	extracellular region,chitin metabolic process,chitin binding
LOC5574313	715.617	-0.661895	0.116467	-5.68311	1.32266e-08	1.44064e-06	AAEL011079	C-Type Lectin (CTL) - mannose binding. [Source:VB Community Annotation]	CTLMA10
LOC5570910	602.108	1.95341	0.345001	5.66204	1.49581e-08	1.61619e-06	AAEL018240				GO:0016020,GO:0016021	membrane,integral component of membrane
LOC110679464	76.9966	-1.85652	0.32815	-5.65752	1.53573e-08	1.64616e-06	AAEL023063
LOC5564448	156.716	-1.49668	0.264666	-5.65497	1.55872e-08	1.65239e-06	AAEL022427				GO:0016020,GO:0016021,GO:0022857,GO:0055085	membrane,integral component of membrane,transmembrane transporter activity,transmembrane transport
LOC5570211	6347.21	-1.04438	0.184709	-5.65417	1.56601e-08	1.65239e-06	AAEL019828				GO:0006508,GO:0008233,GO:0008237,GO:0008270,GO:0016787,GO:0046872	proteolysis,peptidase activity,metallopeptidase activity,zinc ion binding,hydrolase activity,metal ion binding
LOC110680759	106.799	1.59397	0.282151	5.64937	1.6104e-08	1.67308e-06	AAEL027792	defensin anti-microbial peptide [Source:VB Community Annotation]	DEFA		GO:0006952	defense response
LOC5579099	106.799	1.59397	0.282151	5.64937	1.6104e-08	1.67308e-06	AAEL003841	defensin anti-microbial peptide [Source:VB Community Annotation]	DEFA		GO:0002376,GO:0005576,GO:0006952,GO:0042742,GO:0045087,GO:0050829,GO:0050830	immune system process,extracellular region,defense response,defense response to bacterium,innate immune response,defense response to Gram-negative bacterium,defense response to Gram-positive bacterium
LOC5574643	670.3	0.773401	0.137373	5.62993	1.8028e-08	1.85868e-06	AAEL011282	ribosomal RNA small subunit methyltransferase b (sun) [Source:VB Community Annotation]			GO:0001510,GO:0003723,GO:0005730,GO:0006364,GO:0006396,GO:0008168,GO:0008757,GO:0016740,GO:0032259,GO:0042254	RNA methylation,RNA binding,nucleolus,rRNA processing,RNA processing,methyltransferase activity,S-adenosylmethionine-dependent methyltransferase activity,transferase activity,methylation,ribosome biogenesis
LOC5573776	3583.37	-1.06868	0.190112	-5.6213	1.89529e-08	1.93923e-06	AAEL000271	gamma-glutamyl hydrolase [Source:VB Community Annotation]			GO:0005576,GO:0005615,GO:0006508,GO:0008242,GO:0016787,GO:0034722	extracellular region,extracellular space,proteolysis,omega peptidase activity,hydrolase activity,gamma-glutamyl-peptidase activity
LOC5579911	1964.6	-1.25205	0.222895	-5.61723	1.94041e-08	1.97046e-06	AAEL001047	adenylate cyclase [Source:VB Community Annotation]			GO:0016020,GO:0016021,GO:0022857,GO:0055085	membrane,integral component of membrane,transmembrane transporter activity,transmembrane transport
LOC110678056	2896.82	0.72617	0.129447	5.60981	2.02554e-08	2.04156e-06	AAEL027336				GO:0016491,GO:0016620,GO:0055114	oxidoreductase activity,oxidoreductase activity, acting on the aldehyde or oxo group of donors, NAD or NADP as acceptor,oxidation-reduction process
LOC5578287	81.1868	1.86383	0.334681	5.56896	2.56264e-08	2.55129e-06	AAEL013605				GO:0005515	protein binding
LOC5570939	90.6508	-2.14549	0.385289	-5.56853	2.56904e-08	2.55129e-06	AAEL008664				GO:0003824	catalytic activity
LOC5573084	775.102	1.08072	0.194375	5.55996	2.69831e-08	2.6601e-06	AAEL010276	aminomethyltransferase [Source:VB Community Annotation]			GO:0004047,GO:0005515,GO:0005739,GO:0006546,GO:0008483,GO:0016740	aminomethyltransferase activity,protein binding,mitochondrion,glycine catabolic process,transaminase activity,transferase activity
LOC5564060	212.032	0.86407	0.156131	5.53427	3.12529e-08	3.05871e-06	AAEL004063	WD-repeat protein [Source:VB Community Annotation]			GO:0005515	protein binding
LOC5578920	76.7976	-1.84401	0.33403	-5.52048	3.38068e-08	3.28486e-06	AAEL003748	cytochrome P450 [Source:VB Community Annotation]	CYP9AE1		GO:0004497,GO:0005506,GO:0005789,GO:0016020,GO:0016491,GO:0016705,GO:0020037,GO:0031090,GO:0046872,GO:0055114	monooxygenase activity,iron ion binding,endoplasmic reticulum membrane,membrane,oxidoreductase activity,oxidoreductase activity, acting on paired donors, with incorporation or reduction of molecular oxygen,heme binding,organelle membrane,metal ion binding,oxidation-reduction process
LOC5577126	385.353	0.920021	0.166725	5.51819	3.42517e-08	3.30431e-06	AAEL020720
LOC5571799	730.41	0.886854	0.161519	5.49072	4.00296e-08	3.83433e-06	AAEL009323	carbonic anhydrase precursor [Source:VB Community Annotation]			GO:0004089,GO:0008270,GO:0016829,GO:0046872	carbonate dehydratase activity,zinc ion binding,lyase activity,metal ion binding
LOC5579849	63.0384	-5.07097	0.924069	-5.48765	4.07325e-08	3.87418e-06	AAEL005850	Hormone receptor-like in 4 (nuclear receptor) [Source:VB Community Annotation]	HR4		GO:0003677,GO:0003700,GO:0005634,GO:0006355,GO:0008270,GO:0042025,GO:0043565,GO:0046872	DNA binding,DNA-binding transcription factor activity,nucleus,regulation of transcription, DNA-templated,zinc ion binding,host cell nucleus,sequence-specific DNA binding,metal ion binding
LOC110681429	22.2689	3.34401	0.612751	5.45737	4.83245e-08	4.55392e-06	AAEL025700
LOC5575824	527.276	0.904923	0.165842	5.45653	4.85535e-08	4.55392e-06	AAEL012100				GO:0003676,GO:0003723	nucleic acid binding,RNA binding
LOC5575142	1844.85	1.30206	0.238807	5.45238	4.96999e-08	4.62929e-06	AAEL020382	Acetyl-coenzyme A synthetase [Source:UniProtKB/TrEMBL;Acc:Q16EU8]			GO:0000166,GO:0003824,GO:0003987,GO:0005524,GO:0016208,GO:0016874,GO:0019427	nucleotide binding,catalytic activity,acetate-CoA ligase activity,ATP binding,AMP binding,ligase activity,acetyl-CoA biosynthetic process from acetate
LOC110674855	54.1699	-1.98228	0.363645	-5.45114	5.00489e-08	4.62986e-06	AAEL026630				GO:0005515	protein binding
LOC5566869	350.329	-1.30431	0.239856	-5.43791	5.39094e-08	4.95307e-06	AAEL000842	microsomal dipeptidase [Source:VB Community Annotation]			GO:0006508,GO:0008233,GO:0008235,GO:0008237,GO:0008239,GO:0016020,GO:0016787,GO:0016805,GO:0031225,GO:0046872,GO:0070573	proteolysis,peptidase activity,metalloexopeptidase activity,metallopeptidase activity,dipeptidyl-peptidase activity,membrane,hydrolase activity,dipeptidase activity,anchored component of membrane,metal ion binding,metallodipeptidase activity
LOC110674132	18.4238	-3.18274	0.586511	-5.42657	5.74487e-08	5.24258e-06	AAEL024749				GO:0005515	protein binding
LOC5573277	770.931	1.40555	0.259655	5.41315	6.19271e-08	5.61334e-06	AAEL010379	ATP-binding cassette transporter [Source:VB Community Annotation]			GO:0000166,GO:0005524,GO:0016020,GO:0016021,GO:0016887,GO:0042626,GO:0055085	nucleotide binding,ATP binding,membrane,integral component of membrane,ATPase activity,ATPase-coupled transmembrane transporter activity,transmembrane transport
LOC5568468	416.603	1.05541	0.195278	5.40467	6.49281e-08	5.84613e-06	AAEL006887	mRNA turnover protein 4 mrt4 [Source:VB Community Annotation]			GO:0000027,GO:0005634,GO:0005730,GO:0005737,GO:0042254	ribosomal large subunit assembly,nucleus,nucleolus,cytoplasm,ribosome biogenesis
LOC5568583	17622.7	-1.00615	0.186477	-5.39556	6.83115e-08	6.10907e-06	AAEL001113	inorganic phosphate cotransporter, putative [Source:VB Community Annotation]			GO:0016020,GO:0016021,GO:0022857,GO:0055085	membrane,integral component of membrane,transmembrane transporter activity,transmembrane transport
LOC5570915	300.297	0.841902	0.15607	5.3944	6.8753e-08	6.10907e-06	AAEL001506	U3 small nucleolar ribonucleoprotein protein MPP10 [Source:UniProtKB/TrEMBL;Acc:A0A1S4EYY5]			GO:0005634,GO:0005730,GO:0005732,GO:0006364,GO:0034457,GO:0042254	nucleus,nucleolus,small nucleolar ribonucleoprotein complex,rRNA processing,Mpp10 complex,ribosome biogenesis
LOC5575112	4552.38	-0.745962	0.13836	-5.39144	6.98937e-08	6.16983e-06	AAEL011662	plasma glutamate carboxypeptidase [Source:VB Community Annotation]			GO:0005764,GO:0005783,GO:0005794,GO:0006508,GO:0070573	lysosome,endoplasmic reticulum,Golgi apparatus,proteolysis,metallodipeptidase activity
LOC110677277	58.5818	1.92008	0.357375	5.37274	7.7549e-08	6.80115e-06	AAEL020842
LOC110676885	421.452	-2.5979	0.483841	-5.36932	7.9032e-08	6.88649e-06	AAEL021534
LOC110676143	217.252	2.08064	0.388827	5.35106	8.74415e-08	7.57042e-06	AAEL021060
LOC5577667	933.442	-0.682694	0.127651	-5.34813	8.88686e-08	7.64497e-06	AAEL017244				GO:0004177,GO:0006508,GO:0008233,GO:0008237,GO:0008270,GO:0016020,GO:0016021,GO:0016787,GO:0046872	aminopeptidase activity,proteolysis,peptidase activity,metallopeptidase activity,zinc ion binding,membrane,integral component of membrane,hydrolase activity,metal ion binding
LOC5568557	296.545	-1.61867	0.303078	-5.34079	9.25443e-08	7.91078e-06	AAEL001128	AMP dependent coa ligase [Source:VB Community Annotation]			GO:0003824,GO:0016874	catalytic activity,ligase activity
LOC5573149	1995.08	0.61112	0.114985	5.3148	1.06773e-07	9.0697e-06	AAEL001995	protein serine/threonine kinase, putative [Source:VB Community Annotation]
LOC23687959	1063.09	0.980655	0.184789	5.30688	1.11516e-07	9.41334e-06	AAEL017539	cytochrome P450 [Source:VB Community Annotation]	CYP6BY1		GO:0004497,GO:0005506,GO:0016491,GO:0016705,GO:0020037,GO:0046872,GO:0055114	monooxygenase activity,iron ion binding,oxidoreductase activity,oxidoreductase activity, acting on paired donors, with incorporation or reduction of molecular oxygen,heme binding,metal ion binding,oxidation-reduction process
LOC110675802	61.6429	1.87393	0.354493	5.28622	1.24867e-07	1.04749e-05	AAEL023633
LOC5571639	642.385	-0.882387	0.167105	-5.28045	1.2887e-07	1.0736e-05	AAEL009209	C-Type Lectin (CTL) - galactose binding. [Source:VB Community Annotation]	CTLGA6
LOC5573081	58.1996	-3.12213	0.59139	-5.2793	1.29677e-07	1.0736e-05	AAEL025309				GO:0004252,GO:0006508,GO:0008233,GO:0008236,GO:0016020,GO:0016021,GO:0016787	serine-type endopeptidase activity,proteolysis,peptidase activity,serine-type peptidase activity,membrane,integral component of membrane,hydrolase activity
LOC110674731	448.962	1.4784	0.280089	5.27833	1.30364e-07	1.0736e-05
LOC5577545	2327.75	0.541546	0.102622	5.27709	1.31254e-07	1.07438e-05	AAEL013249				GO:0003723,GO:0005515	RNA binding,protein binding
LOC5571297	1083.05	-1.00261	0.190251	-5.26996	1.36456e-07	1.11023e-05	AAEL001586	glucosyl/glucuronosyl transferases [Source:VB Community Annotation]			GO:0008194,GO:0015020,GO:0016020,GO:0016021,GO:0016740,GO:0016757,GO:0016758	UDP-glycosyltransferase activity,glucuronosyltransferase activity,membrane,integral component of membrane,transferase activity,transferase activity, transferring glycosyl groups,transferase activity, transferring hexosyl groups
LOC5570268	5459.42	-0.914028	0.173586	-5.26558	1.3975e-07	1.12946e-05	AAEL008202	serine-type enodpeptidase, [Source:VB Community Annotation]			GO:0004252,GO:0006508	serine-type endopeptidase activity,proteolysis
LOC110678855	1145.95	-1.75947	0.334208	-5.2646	1.40493e-07	1.12946e-05	AAEL025367
LOC110677669	188.917	-1.27049	0.241508	-5.26066	1.43539e-07	1.14038e-05	AAEL024539
LOC5573229	188.917	-1.27049	0.241508	-5.26066	1.43539e-07	1.14038e-05	AAEL024539				GO:0005515	protein binding
LOC110674852	21.4008	-2.82524	0.537615	-5.25513	1.47917e-07	1.16828e-05	AAEL021467				GO:0005515	protein binding
LOC110679049	2244.02	-0.661642	0.125997	-5.25124	1.51076e-07	1.17944e-05	AAEL024196
LOC5569724	2244.02	-0.661642	0.125997	-5.25124	1.51076e-07	1.17944e-05	AAEL007880	ornithine decarboxylase [Source:VB Community Annotation]			GO:0003824,GO:0006596	catalytic activity,polyamine biosynthetic process
LOC5566122	173.378	-1.3648	0.260298	-5.24321	1.57803e-07	1.22488e-05	AAEL005177	adenylate cyclase [Source:VB Community Annotation]			GO:0000166,GO:0004016,GO:0005524,GO:0005886,GO:0006171,GO:0009190,GO:0016020,GO:0016829,GO:0016849,GO:0035556,GO:0046872	nucleotide binding,adenylate cyclase activity,ATP binding,plasma membrane,cAMP biosynthetic process,cyclic nucleotide biosynthetic process,membrane,lyase activity,phosphorus-oxygen lyase activity,intracellular signal transduction,metal ion binding
LOC5578754	190.306	0.916575	0.174888	5.24094	1.59764e-07	1.23301e-05	AAEL003654				GO:0005634,GO:0008033,GO:0030488,GO:0031515	nucleus,tRNA processing,tRNA methylation,tRNA (m1A) methyltransferase complex
LOC5579101	573.391	-1.33195	0.25457	-5.23217	1.67534e-07	1.28563e-05
LOC5567661	50.5981	1.82959	0.349809	5.23026	1.6927e-07	1.29161e-05	AAEL023949				GO:0004497,GO:0005506,GO:0016491,GO:0016705,GO:0020037,GO:0046872,GO:0055114	monooxygenase activity,iron ion binding,oxidoreductase activity,oxidoreductase activity, acting on paired donors, with incorporation or reduction of molecular oxygen,heme binding,metal ion binding,oxidation-reduction process
LOC5577433	709.081	-0.659444	0.126269	-5.22252	1.76507e-07	1.33927e-05	AAEL019845				GO:0016301,GO:0016310,GO:0016740,GO:0032958	kinase activity,phosphorylation,transferase activity,inositol phosphate biosynthetic process
LOC5564954	105.696	-1.58553	0.303805	-5.21889	1.80003e-07	1.35816e-05	AAEL014668	ankyrin 2,3/unc44 [Source:VB Community Annotation]			GO:0005515	protein binding
LOC5566670	208.138	-1.09789	0.210816	-5.20781	1.91084e-07	1.43376e-05	AAEL005548	tetraspanin, putative [Source:VB Community Annotation]			GO:0016020,GO:0016021	membrane,integral component of membrane
LOC5565353	1548.66	0.554063	0.106445	5.20517	1.93822e-07	1.43936e-05	AAEL004738	Methionine aminopeptidase 2 [Source:UniProtKB/TrEMBL;Acc:Q17BZ1]			GO:0004177,GO:0005737,GO:0006508,GO:0008233,GO:0008235,GO:0016787,GO:0046872,GO:0070006,GO:0070084	aminopeptidase activity,cytoplasm,proteolysis,peptidase activity,metalloexopeptidase activity,hydrolase activity,metal ion binding,metalloaminopeptidase activity,protein initiator methionine removal
LOC5570210	2555.03	-0.859148	0.165061	-5.20503	1.93961e-07	1.43936e-05	AAEL008163	protease m1 zinc metalloprotease [Source:VB Community Annotation]			GO:0004177,GO:0006508,GO:0008233,GO:0008237,GO:0008270,GO:0016787,GO:0046872	aminopeptidase activity,proteolysis,peptidase activity,metallopeptidase activity,zinc ion binding,hydrolase activity,metal ion binding
LOC5577025	770.03	0.689349	0.132724	5.19386	2.05978e-07	1.52018e-05	AAEL012932	Methyltransferase-like protein [Source:UniProtKB/TrEMBL;Acc:Q16KM2]			GO:0008168,GO:0016740,GO:0032259	methyltransferase activity,transferase activity,methylation
LOC5576923	299.99	1.69037	0.325965	5.18573	2.15172e-07	1.57941e-05	AAEL012864				GO:0008080	N-acetyltransferase activity
LOC5569955	88.6142	1.37901	0.266396	5.17652	2.26065e-07	1.6504e-05	AAEL008050				GO:0017148,GO:0030598	negative regulation of translation,rRNA N-glycosylase activity
LOC5567885	1148.03	-0.947453	0.18313	-5.17365	2.29563e-07	1.66692e-05	AAEL006359	sulfotransferase (sult) [Source:VB Community Annotation]			GO:0008146,GO:0016740	sulfotransferase activity,transferase activity
LOC5572374	2142.56	-0.986251	0.190865	-5.16726	2.3755e-07	1.7157e-05	AAEL009764	xaa-pro aminopeptidase [Source:VB Community Annotation]			GO:0006508,GO:0016787,GO:0046872,GO:0070006	proteolysis,hydrolase activity,metal ion binding,metalloaminopeptidase activity
LOC5573924	683.765	0.993231	0.19229	5.16527	2.40096e-07	1.72486e-05	AAEL002231	cuticle protein, putative [Source:VB Community Annotation]
LOC110675812	43.5574	2.37865	0.460791	5.16212	2.44173e-07	1.74487e-05	AAEL020088
LOC5576560	436.384	0.708716	0.137534	5.15304	2.56303e-07	1.82191e-05	AAEL012618				GO:0003676,GO:0003723	nucleic acid binding,RNA binding
LOC5572599	474.424	0.762719	0.148252	5.14476	2.67869e-07	1.89415e-05	AAEL009912				GO:0003723	RNA binding
LOC5567569	122.883	-1.08834	0.211684	-5.14135	2.72774e-07	1.9188e-05	AAEL006159				GO:0005576,GO:0006030,GO:0008061	extracellular region,chitin metabolic process,chitin binding
LOC110674569	297.719	-1.06667	0.207887	-5.13099	2.88226e-07	1.99947e-05	AAEL020789
LOC5567112	309.731	-0.966083	0.188288	-5.13087	2.88402e-07	1.99947e-05	AAEL005826	E3 ubiquitin-protein ligase [Source:UniProtKB/TrEMBL;Acc:A0A1S4FBP6]			GO:0005515,GO:0005634,GO:0005737,GO:0006511,GO:0007275,GO:0008270,GO:0016567,GO:0016740,GO:0042025,GO:0046872	protein binding,nucleus,cytoplasm,ubiquitin-dependent protein catabolic process,multicellular organism development,zinc ion binding,protein ubiquitination,transferase activity,host cell nucleus,metal ion binding
LOC5575162	4115.89	-0.495269	0.0965307	-5.13069	2.88684e-07	1.99947e-05	AAEL000328				GO:0016491,GO:0055114	oxidoreductase activity,oxidation-reduction process
LOC5577406	2320.37	0.577954	0.112912	5.11863	3.07763e-07	2.12074e-05	AAEL003179	protein arginine n-methyltransferase 1, [Source:VB Community Annotation]			GO:0006479,GO:0008168,GO:0016274,GO:0016740,GO:0018216,GO:0032259,GO:0035246	protein methylation,methyltransferase activity,protein-arginine N-methyltransferase activity,transferase activity,peptidyl-arginine methylation,methylation,peptidyl-arginine N-methylation
LOC110679374	2088.91	0.711404	0.139138	5.11294	3.17191e-07	2.17461e-05	AAEL026843
LOC5576350	377.607	-0.912656	0.178665	-5.10821	3.25229e-07	2.21846e-05	AAEL021615				GO:0016491,GO:0055114	oxidoreductase activity,oxidation-reduction process
LOC5578870	197.66	-2.07798	0.407431	-5.10019	3.39304e-07	2.29558e-05	AAEL003738				GO:0005515	protein binding
LOC5571766	515.398	0.623131	0.122186	5.09984	3.39935e-07	2.29558e-05	AAEL009285	DEAD box ATP-dependent RNA helicase [Source:VB Community Annotation]			GO:0000166,GO:0003676,GO:0003723,GO:0003724,GO:0004004,GO:0004386,GO:0005524,GO:0005634,GO:0005730,GO:0016787	nucleotide binding,nucleic acid binding,RNA binding,RNA helicase activity,GO_0004004,helicase activity,ATP binding,nucleus,nucleolus,hydrolase activity
LOC5570366	1586.71	-1.27592	0.25029	-5.09775	3.43712e-07	2.30954e-05	AAEL008274				GO:0005515	protein binding
LOC5571386	1693.9	-0.677155	0.133061	-5.08904	3.5988e-07	2.40621e-05	AAEL009017	glutathione transferase [Source:VB Community Annotation]	GSTT1		GO:0004364,GO:0005515,GO:0016740	glutathione transferase activity,protein binding,transferase activity
LOC5567358	1387.77	-1.42928	0.280995	-5.08649	3.6475e-07	2.41459e-05	AAEL006023	Vanin-like protein 1 precursor, putative [Source:VB Community Annotation]			GO:0006807,GO:0016020,GO:0016021,GO:0016787,GO:0016811	nitrogen compound metabolic process,membrane,integral component of membrane,hydrolase activity,hydrolase activity, acting on carbon-nitrogen (but not peptide) bonds, in linear amides
LOC5571536	648.649	-0.937877	0.184412	-5.08577	3.6613e-07	2.41459e-05	AAEL009132	cytochrome P450 [Source:VB Community Annotation]	CYP6Y3		GO:0004497,GO:0005506,GO:0016491,GO:0016705,GO:0020037,GO:0043231,GO:0046872,GO:0055114	monooxygenase activity,iron ion binding,oxidoreductase activity,oxidoreductase activity, acting on paired donors, with incorporation or reduction of molecular oxygen,heme binding,intracellular membrane-bounded organelle,metal ion binding,oxidation-reduction process
LOC5564930	3589.62	-0.911867	0.179322	-5.08509	3.67457e-07	2.41459e-05	AAEL004505	serine collagenase 1 precursor, putative [Source:VB Community Annotation]			GO:0004252,GO:0006508	serine-type endopeptidase activity,proteolysis
LOC5577284	4321.36	-0.826801	0.162607	-5.08466	3.68285e-07	2.41459e-05	AAEL013138				GO:0005515	protein binding
LOC5571197	315.761	0.873272	0.171821	5.08246	3.72569e-07	2.43088e-05	AAEL008886				GO:0003677,GO:0005634,GO:0046872	DNA binding,nucleus,metal ion binding
LOC5576849	261.149	-0.924963	0.182145	-5.07817	3.81082e-07	2.47447e-05	AAEL012832	cytochrome B561 [Source:VB Community Annotation]			GO:0005765,GO:0016020,GO:0016021,GO:0016491,GO:0031902,GO:0046872,GO:0055114	lysosomal membrane,membrane,integral component of membrane,oxidoreductase activity,late endosome membrane,metal ion binding,oxidation-reduction process
LOC5576042	2952.07	0.598582	0.118016	5.07206	3.93539e-07	2.54313e-05	AAEL012279	Eukaryotic translation initiation factor 3 subunit J (eIF3j) [Source:VB Community Annotation]			GO:0001732,GO:0002183,GO:0003743,GO:0005737,GO:0005852,GO:0006412,GO:0006413,GO:0016282,GO:0033290	formation of cytoplasmic translation initiation complex,cytoplasmic translational initiation,translation initiation factor activity,cytoplasm,eukaryotic translation initiation factor 3 complex,translation,translational initiation,eukaryotic 43S preinitiation complex,eukaryotic 48S preinitiation complex
LOC110677276	128.168	1.68889	0.333074	5.07062	3.96526e-07	2.54734e-05	AAEL024645
LOC5572559	2119.71	-0.924152	0.182303	-5.06931	3.99253e-07	2.54734e-05	AAEL009895	neprilysin [Source:VB Community Annotation]			GO:0004222,GO:0005886,GO:0006508,GO:0008233,GO:0008237,GO:0016020,GO:0016021,GO:0016787,GO:0046872	metalloendopeptidase activity,plasma membrane,proteolysis,peptidase activity,metallopeptidase activity,membrane,integral component of membrane,hydrolase activity,metal ion binding
LOC110678733	61.2472	-2.61704	0.516281	-5.06903	3.99849e-07	2.54734e-05	AAEL002126	Clip-Domain Serine Protease family A. Protease homologue. [Source:VB Community Annotation]	CLIPA15		GO:0004252,GO:0006508	serine-type endopeptidase activity,proteolysis
LOC5564200	815.867	-0.76341	0.150745	-5.06424	4.10038e-07	2.59998e-05	AAEL018273				GO:0005737,GO:0006629,GO:0008081,GO:0030246,GO:0046475,GO:0047389,GO:2001070	cytoplasm,lipid metabolic process,phosphoric diester hydrolase activity,carbohydrate binding,glycerophospholipid catabolic process,glycerophosphocholine phosphodiesterase activity,starch binding
LOC5576542	34.6717	-1.90995	0.377541	-5.05893	4.21612e-07	2.66089e-05	AAEL027209				GO:0004843,GO:0006508,GO:0006511,GO:0008233,GO:0016020,GO:0016021,GO:0016579,GO:0036459	thiol-dependent ubiquitin-specific protease activity,proteolysis,ubiquitin-dependent protein catabolic process,peptidase activity,membrane,integral component of membrane,protein deubiquitination,thiol-dependent ubiquitinyl hydrolase activity
LOC110674851	49.456	-1.99466	0.394801	-5.05232	4.36483e-07	2.74193e-05	AAEL027338				GO:0005515	protein binding
LOC5572988	52.0765	-1.5251	0.301955	-5.05075	4.40085e-07	2.75176e-05	AAEL001938	ATP-binding cassette sub-family A member 3, putative [Source:VB Community Annotation]			GO:0000166,GO:0005524,GO:0016020,GO:0016021,GO:0016887,GO:0042626,GO:0055085	nucleotide binding,ATP binding,membrane,integral component of membrane,ATPase activity,ATPase-coupled transmembrane transporter activity,transmembrane transport
LOC23687491	1012.69	-0.599578	0.119169	-5.03134	4.87071e-07	3.03151e-05	AAEL017071	Carboxylic ester hydrolase [Source:UniProtKB/TrEMBL;Acc:A0A1S4G5Q9]			GO:0016787,GO:0052689	hydrolase activity,carboxylic ester hydrolase activity
LOC5570924	1191.14	-0.628791	0.125304	-5.01813	5.21776e-07	3.23262e-05	AAEL026751				GO:0005515,GO:0008270,GO:0046872	protein binding,zinc ion binding,metal ion binding
LOC5570852	219.262	-0.93248	0.187586	-4.97096	6.66227e-07	4.10871e-05	AAEL008632	ABC transporter [Source:VB Community Annotation]			GO:0000166,GO:0005524,GO:0016020,GO:0016021,GO:0016887,GO:0042626	nucleotide binding,ATP binding,membrane,integral component of membrane,ATPase activity,ATPase-coupled transmembrane transporter activity
LOC5564700	690.328	-7.72387	1.55443	-4.96894	6.73215e-07	4.13293e-05	AAEL014568				GO:0004252,GO:0006508	serine-type endopeptidase activity,proteolysis
LOC5566999	55.8254	1.3688	0.275521	4.96804	6.76341e-07	4.13333e-05	AAEL005748	elastase, putative [Source:VB Community Annotation]			GO:0004252,GO:0005576,GO:0006030,GO:0006508,GO:0008061	serine-type endopeptidase activity,extracellular region,chitin metabolic process,proteolysis,chitin binding
LOC5564668	170.641	1.07306	0.21621	4.96306	6.93915e-07	4.22163e-05	AAEL014551	triacylglycerol lipase, pancreatic [Source:VB Community Annotation]			GO:0004806,GO:0005576,GO:0006629,GO:0046872,GO:0052689	triglyceride lipase activity,extracellular region,lipid metabolic process,metal ion binding,carboxylic ester hydrolase activity
LOC5564161	2529.13	0.66369	0.133946	4.9549	7.23675e-07	4.38294e-05	AAEL004148	heat shock protein 70 (hsp70)-interacting protein [Source:VB Community Annotation]			GO:0005515	protein binding
LOC5569097	533.198	0.732761	0.14793	4.95344	7.29143e-07	4.39634e-05	AAEL007356
LOC5566855	93.8433	1.89882	0.383519	4.95104	7.38177e-07	4.43103e-05	AAEL000820	dimethylaniline monooxygenase [Source:VB Community Annotation]			GO:0004497,GO:0004499,GO:0016491,GO:0050660,GO:0050661,GO:0055114	monooxygenase activity,N,N-dimethylaniline monooxygenase activity,oxidoreductase activity,flavin adenine dinucleotide binding,NADP binding,oxidation-reduction process
LOC5579660	478.524	-0.788538	0.159343	-4.94867	7.47219e-07	4.46546e-05	AAEL003959	short-chain dehydrogenase [Source:VB Community Annotation]			GO:0016020,GO:0016021,GO:0016491,GO:0055114	membrane,integral component of membrane,oxidoreductase activity,oxidation-reduction process
LOC5573293	971.007	-0.80293	0.162448	-4.94269	7.7053e-07	4.58448e-05	AAEL010389	Carboxylic ester hydrolase (Fragment) [Source:UniProtKB/TrEMBL;Acc:Q16T49]			GO:0016787,GO:0052689	hydrolase activity,carboxylic ester hydrolase activity
LOC5568284	746.616	-0.867326	0.175614	-4.93882	7.85966e-07	4.65581e-05	AAEL006711				GO:0005739,GO:0005740,GO:0016020,GO:0016021,GO:0043065	mitochondrion,mitochondrial envelope,membrane,integral component of membrane,positive regulation of apoptotic process
LOC5569118	1396.29	-0.702709	0.142656	-4.9259	8.39709e-07	4.95245e-05	AAEL007375	pyruvate dehydrogenase [Source:VB Community Annotation]			GO:0000166,GO:0004672,GO:0005524,GO:0005739,GO:0005759,GO:0006468,GO:0016301,GO:0016310,GO:0016740	nucleotide binding,protein kinase activity,ATP binding,mitochondrion,mitochondrial matrix,protein phosphorylation,kinase activity,phosphorylation,transferase activity
LOC5574378	2000.38	-1.68444	0.342118	-4.92358	8.49766e-07	4.97248e-05	AAEL011109				GO:0006812,GO:0015299,GO:0016020,GO:0016021,GO:0055085,GO:1902600	cation transport,solute:proton antiporter activity,membrane,integral component of membrane,transmembrane transport,proton transmembrane transport
LOC5564011	2725.03	-0.613115	0.12453	-4.92341	8.50468e-07	4.97248e-05	AAEL014272	molybdopterin cofactor sulfurase (mosc) [Source:VB Community Annotation]			GO:0003824,GO:0016020,GO:0016021,GO:0030151,GO:0030170	catalytic activity,membrane,integral component of membrane,molybdenum ion binding,pyridoxal phosphate binding
LOC5571940	667.714	-0.587107	0.119302	-4.92118	8.60261e-07	5.00806e-05	AAEL009423	Class B Scavenger Receptor (CD36 domain). [Source:VB Community Annotation]	SCRBQ2		GO:0005886,GO:0016020,GO:0016021	plasma membrane,membrane,integral component of membrane
LOC5565714	53.5208	-1.83467	0.373995	-4.9056	9.31418e-07	5.39903e-05	AAEL027202				GO:0005515	protein binding
LOC110675990	2074.91	-1.07989	0.220228	-4.90349	9.41511e-07	5.41117e-05	AAEL020833
LOC5575792	1563.49	0.95474	0.194706	4.90348	9.41527e-07	5.41117e-05	AAEL012064	Niemann-Pick Type C-2, putative [Source:VB Community Annotation]			GO:0005576,GO:0005623,GO:0032367	extracellular region,obsolete cell,intracellular cholesterol transport
LOC5563935	446.584	-1.11288	0.227288	-4.89633	9.76433e-07	5.58801e-05	AAEL014244	glucosyl/glucuronosyl transferases [Source:VB Community Annotation]			GO:0008194,GO:0015020,GO:0016020,GO:0016021,GO:0016740,GO:0016757,GO:0016758	UDP-glycosyltransferase activity,glucuronosyltransferase activity,membrane,integral component of membrane,transferase activity,transferase activity, transferring glycosyl groups,transferase activity, transferring hexosyl groups
LOC5573251	160.763	0.961358	0.196696	4.88752	1.02113e-06	5.81913e-05	AAEL010349	tRNA (guanine-N2-)-methyltransferase, putative [Source:VB Community Annotation]			GO:0000049,GO:0003723,GO:0004809,GO:0008033,GO:0008168,GO:0016740,GO:0030488,GO:0032259	tRNA binding,RNA binding,tRNA (guanine-N2-)-methyltransferase activity,tRNA processing,methyltransferase activity,transferase activity,tRNA methylation,methylation
LOC5579658	373.337	0.775397	0.158822	4.88219	1.04916e-06	5.95378e-05	AAEL003949				GO:0005515	protein binding
LOC5571538	289.6	-0.814622	0.16699	-4.87827	1.07021e-06	6.04781e-05	AAEL009117	cytochrome P450 [Source:VB Community Annotation]	CYP6M5		GO:0004497,GO:0005506,GO:0016020,GO:0016021,GO:0016491,GO:0016705,GO:0020037,GO:0046872,GO:0055114	monooxygenase activity,iron ion binding,membrane,integral component of membrane,oxidoreductase activity,oxidoreductase activity, acting on paired donors, with incorporation or reduction of molecular oxygen,heme binding,metal ion binding,oxidation-reduction process
LOC5564424	1006.2	-0.818987	0.168199	-4.86914	1.12083e-06	6.30747e-05	AAEL014441				GO:0016020,GO:0016021	membrane,integral component of membrane
LOC5576507	2212.21	-1.42673	0.293153	-4.86685	1.13392e-06	6.35464e-05	AAEL012560	serine collagenase 1 precursor, putative [Source:VB Community Annotation]			GO:0004252,GO:0006508	serine-type endopeptidase activity,proteolysis
LOC5570328	167.471	-1.00654	0.206945	-4.86381	1.1515e-06	6.42649e-05	AAEL001387				GO:0005737,GO:0005764,GO:0005765,GO:0016020	cytoplasm,lysosome,lysosomal membrane,membrane
LOC5575312	3463.63	-1.16357	0.239473	-4.85888	1.1805e-06	6.56124e-05	AAEL002627				GO:0005576,GO:0008061	extracellular region,chitin binding
LOC5574905	2631.05	-0.928449	0.19115	-4.85717	1.19077e-06	6.59119e-05	AAEL011510	multiple inositol polyphosphate phosphatase [Source:VB Community Annotation]			GO:0004446,GO:0016311,GO:0016791,GO:0034417,GO:0052826	inositol-hexakisphosphate phosphatase activity,dephosphorylation,phosphatase activity,bisphosphoglycerate 3-phosphatase activity,inositol hexakisphosphate 2-phosphatase activity
LOC5570825	1413.06	-1.04571	0.215655	-4.84898	1.24096e-06	6.84098e-05	AAEL008599	zinc carboxypeptidase [Source:VB Community Annotation]			GO:0004180,GO:0004181,GO:0006508,GO:0008233,GO:0008237,GO:0008270,GO:0016787,GO:0046872	carboxypeptidase activity,metallocarboxypeptidase activity,proteolysis,peptidase activity,metallopeptidase activity,zinc ion binding,hydrolase activity,metal ion binding
LOC5566341	821.069	-0.791161	0.163242	-4.84656	1.25621e-06	6.8969e-05	AAEL005329
LOC5569242	491.548	1.00473	0.207434	4.84358	1.27518e-06	6.97272e-05	AAEL021555				GO:0016020,GO:0016021,GO:0022857,GO:0055085	membrane,integral component of membrane,transmembrane transporter activity,transmembrane transport
LOC110674221	162.92	-1.09927	0.227512	-4.83173	1.35354e-06	7.37132e-05	AAEL025109
LOC5564310	264.413	-1.78435	0.369673	-4.82683	1.38722e-06	7.51525e-05	AAEL000566
LOC5575941	414.355	0.984183	0.203922	4.82628	1.3911e-06	7.51525e-05	AAEL012185	ribosome biogenesis regulatory protein [Source:VB Community Annotation]			GO:0005634,GO:0042254	nucleus,ribosome biogenesis
LOC110675701	8.79389	6.58987	1.36582	4.82486	1.40101e-06	7.53868e-05	AAEL023405
LOC5567252	18.8566	-3.53516	0.734563	-4.8126	1.48978e-06	7.9845e-05	AAEL026421
LOC5568779	602.132	1.12075	0.233503	4.79975	1.58865e-06	8.48073e-05	AAEL007126	sugar transporter [Source:VB Community Annotation]			GO:0016020,GO:0016021,GO:0022857,GO:0055085	membrane,integral component of membrane,transmembrane transporter activity,transmembrane transport
LOC5577738	2164.41	-1.54788	0.324612	-4.76841	1.8569e-06	9.85822e-05	AAEL003290	cell wall protein DAN4 precursor, putative [Source:VB Community Annotation]
LOC5572224	4208.92	-0.583459	0.122385	-4.76741	1.8661e-06	9.85822e-05	AAEL009658	alpha,alpha-trehalase [Source:VB Community Annotation]			GO:0003824,GO:0004555,GO:0005975,GO:0005991,GO:0008152,GO:0016787,GO:0016798	catalytic activity,alpha,alpha-trehalase activity,carbohydrate metabolic process,trehalose metabolic process,metabolic process,hydrolase activity,hydrolase activity, acting on glycosyl bonds
LOC5569949	403.803	0.802015	0.168238	4.76714	1.86858e-06	9.85822e-05	AAEL008815				GO:0006629,GO:0016020,GO:0016021,GO:0016491,GO:0055114,GO:0080019,GO:0102965	lipid metabolic process,membrane,integral component of membrane,oxidoreductase activity,oxidation-reduction process,fatty-acyl-CoA reductase (alcohol-forming) activity,alcohol-forming fatty acyl-CoA reductase activity
LOC5565282	2364.74	0.717578	0.150761	4.75972	1.93866e-06	0.000101882	AAEL014797	acyl-coa dehydrogenase [Source:VB Community Annotation]			GO:0003995,GO:0016491,GO:0016627,GO:0050660,GO:0055114	acyl-CoA dehydrogenase activity,oxidoreductase activity,oxidoreductase activity, acting on the CH-CH group of donors,flavin adenine dinucleotide binding,oxidation-reduction process
LOC5569815	2256.25	0.75884	0.159618	4.75409	1.99343e-06	0.000104354	AAEL001293
LOC5575327	195.756	1.01442	0.213543	4.75043	2.02987e-06	0.000105851	AAEL020706				GO:0004252,GO:0006508	serine-type endopeptidase activity,proteolysis
LOC5571936	461.462	-0.914434	0.19273	-4.74463	2.08886e-06	0.000108508	AAEL009424	serine/threonine-protein kinase rio3 (rio kinase 3) [Source:VB Community Annotation]			GO:0000166,GO:0004674,GO:0005524,GO:0006468,GO:0016301,GO:0016310,GO:0016740,GO:0046872	nucleotide binding,protein serine/threonine kinase activity,ATP binding,protein phosphorylation,kinase activity,phosphorylation,transferase activity,metal ion binding
LOC5565923	182.011	0.849141	0.179117	4.74069	2.12988e-06	0.000110215	AAEL000708	hiv-1 rev binding protein [Source:VB Community Annotation]			GO:0003723,GO:0005634,GO:0005730,GO:0006364,GO:0042254	RNA binding,nucleus,nucleolus,rRNA processing,ribosome biogenesis
LOC5566936	1038.51	-0.556476	0.117597	-4.73206	2.22248e-06	0.000114568	AAEL005699	membrane protein tms1d [Source:VB Community Annotation]			GO:0006658,GO:0006665,GO:0016020,GO:0016021	phosphatidylserine metabolic process,sphingolipid metabolic process,membrane,integral component of membrane
LOC5568838	498.948	0.666431	0.141093	4.72334	2.32003e-06	0.000119142	AAEL001169	ribosome biogenesis protein BOP1 homolog [Source:VB Community Annotation]			GO:0000463,GO:0000466,GO:0005515,GO:0005634,GO:0005654,GO:0005730,GO:0006364,GO:0030687,GO:0042254,GO:0042273,GO:0043021	maturation of LSU-rRNA from tricistronic rRNA transcript (SSU-rRNA, 5.8S rRNA, LSU-rRNA),maturation of 5.8S rRNA from tricistronic rRNA transcript (SSU-rRNA, 5.8S rRNA, LSU-rRNA),protein binding,nucleus,nucleoplasm,nucleolus,rRNA processing,preribosome, large subunit precursor,ribosome biogenesis,ribosomal large subunit biogenesis,ribonucleoprotein complex binding
LOC110673988	70.0084	1.77381	0.376703	4.70879	2.49195e-06	0.000127486	AAEL022454
LOC5577714	14.1145	3.74299	0.796172	4.70123	2.58594e-06	0.000131795	AAEL013338	lethal(2)essential for life protein, l2efl [Source:VB Community Annotation]			GO:0046872	metal ion binding
LOC5568916	6746.38	-0.781165	0.1666	-4.68887	2.74719e-06	0.000139487	AAEL019536				GO:0004177,GO:0006508,GO:0008233,GO:0008237,GO:0008270,GO:0016787,GO:0046872	aminopeptidase activity,proteolysis,peptidase activity,metallopeptidase activity,zinc ion binding,hydrolase activity,metal ion binding
LOC5570147	712.536	0.619225	0.132097	4.68763	2.76381e-06	0.000139805	AAEL008128	mitochondrial inner membrane protein translocase, 13kD-subunit, putative [Source:VB Community Annotation]			GO:0005739,GO:0005743,GO:0005758,GO:0015031,GO:0046872,GO:0072321	mitochondrion,mitochondrial inner membrane,mitochondrial intermembrane space,protein transport,metal ion binding,chaperone-mediated protein transport
LOC5579043	2386.69	-0.794628	0.169632	-4.68442	2.80752e-06	0.000141486	AAEL013987
LOC5576452	2079.13	-1.51995	0.324828	-4.67924	2.87938e-06	0.000144568	AAEL012536
LOC5564166	404.6	-1.33057	0.284918	-4.67001	3.01192e-06	0.000150412	AAEL004126	sterol desaturase [Source:VB Community Annotation]			GO:0005506,GO:0008610,GO:0016020,GO:0016021,GO:0016491,GO:0055114	iron ion binding,lipid biosynthetic process,membrane,integral component of membrane,oxidoreductase activity,oxidation-reduction process
LOC5571008	189.999	0.929768	0.199111	4.66959	3.01804e-06	0.000150412	AAEL008728	DEAD box ATP-dependent RNA helicase [Source:VB Community Annotation]			GO:0000166,GO:0003676,GO:0003724,GO:0004386,GO:0005524,GO:0016787	nucleotide binding,nucleic acid binding,RNA helicase activity,helicase activity,ATP binding,hydrolase activity
LOC5565656	182.296	-10.9581	2.34715	-4.66869	3.03124e-06	0.000150514	AAEL004915
LOC5579108	837.993	-0.606164	0.129862	-4.66777	3.04486e-06	0.000150637	AAEL003844	galectin [Source:VB Community Annotation]	GALE5		GO:0030246	carbohydrate binding
LOC5576221	4124.46	-0.549911	0.117858	-4.66589	3.07283e-06	0.000151243	AAEL002833	cathepsin l [Source:VB Community Annotation]			GO:0006508,GO:0008233,GO:0008234,GO:0016787	proteolysis,peptidase activity,cysteine-type peptidase activity,hydrolase activity
LOC110674127	35.5195	-1.91612	0.410705	-4.66545	3.0795e-06	0.000151243	AAEL024231				GO:0005515	protein binding
LOC5570905	251.132	-1.51367	0.324603	-4.66314	3.11427e-06	0.000152396	AAEL001492	cgmp-dependent 3,5-cyclic phosphodiesterase [Source:VB Community Annotation]			GO:0004114,GO:0005515,GO:0007165,GO:0008081,GO:0016787,GO:0046872,GO:0047555	3',5'-cyclic-nucleotide phosphodiesterase activity,protein binding,signal transduction,phosphoric diester hydrolase activity,hydrolase activity,metal ion binding,3',5'-cyclic-GMP phosphodiesterase activity
LOC23687682	63.2421	-2.90029	0.622502	-4.65908	3.17626e-06	0.000154758	AAEL017262				GO:0042302	structural constituent of cuticle
LOC5566684	4264.1	0.53704	0.115294	4.65799	3.19311e-06	0.000154758	AAEL005567	nucleosome assembly protein [Source:VB Community Annotation]			GO:0005634,GO:0006334	nucleus,nucleosome assembly
LOC5572220	611.496	-1.18285	0.253953	-4.65775	3.19691e-06	0.000154758	AAEL009627
LOC5576498	520.762	-0.693248	0.148886	-4.65623	3.22055e-06	0.000155345	AAEL012549	ATPase, class vi, type 11c [Source:VB Community Annotation]			GO:0000166,GO:0000287,GO:0005524,GO:0015914,GO:0016020,GO:0016021,GO:0034204,GO:0140326	nucleotide binding,magnesium ion binding,ATP binding,phospholipid transport,membrane,integral component of membrane,lipid translocation,ATPase-coupled intramembrane lipid transporter activity
LOC5574109	118.639	-0.912921	0.19616	-4.65395	3.2563e-06	0.000156096	AAEL002263
LOC5577363	176.658	0.88475	0.19013	4.65339	3.26515e-06	0.000156096	AAEL000422	U3 small nucleolar RNA-associated protein homolog, putative [Source:VB Community Annotation]			GO:0005515,GO:0005730,GO:0006364	protein binding,nucleolus,rRNA processing
LOC5575321	1104.07	-0.656805	0.141156	-4.65304	3.27077e-06	0.000156096	AAEL002597				GO:0007343,GO:0033011,GO:0035038,GO:0035039,GO:0050699	egg activation,perinuclear theca,female pronucleus assembly,male pronucleus assembly,WW domain binding
LOC110675378	239.486	-11.3517	2.44313	-4.6464	3.37784e-06	0.000160638	AAEL025434
LOC5579951	630.101	-0.621667	0.133956	-4.64084	3.46996e-06	0.000164439	AAEL006786	GTPase_rho [Source:VB Community Annotation]			GO:0003924,GO:0005525,GO:0007264	GTPase activity,GTP binding,small GTPase mediated signal transduction
LOC5565831	60.5129	-3.90079	0.841098	-4.63774	3.52242e-06	0.000166342	AAEL005024
LOC110675569	19.8113	-2.70565	0.583773	-4.63476	3.57345e-06	0.000168164	AAEL026016
LOC5579095	221.052	1.13306	0.244588	4.63252	3.6124e-06	0.000169406	AAEL003857	defensin anti-microbial peptide [Source:VB Community Annotation]	DEFD		GO:0002376,GO:0005576,GO:0006952,GO:0042742,GO:0045087	immune system process,extracellular region,defense response,defense response to bacterium,innate immune response
LOC5577480	169.886	0.802004	0.17321	4.63025	3.65222e-06	0.000170681	AAEL024613
LOC5569095	501.066	-0.829245	0.179301	-4.62488	3.74824e-06	0.000174565	AAEL007364	7,8-dihydro-8-oxoguanine-triphosphatase, putative [Source:UniProtKB/TrEMBL;Acc:Q172L0]			GO:0016787	hydrolase activity
LOC110678811	137.808	1.10207	0.238511	4.62064	3.8255e-06	0.00017755	AAEL026802
LOC110678199	1996.53	-1.54728	0.334955	-4.61938	3.84892e-06	0.000178026	AAEL023555
LOC5578857	10032.1	-0.384358	0.0832658	-4.61604	3.91132e-06	0.000179961	AAEL027402				GO:0005515	protein binding
LOC5568175	243.544	1.98551	0.430163	4.61572	3.9174e-06	0.000179961	AAEL006617				GO:0004672,GO:0005524,GO:0006468	protein kinase activity,ATP binding,protein phosphorylation
LOC5570136	1374.85	-0.703301	0.152451	-4.61331	3.96313e-06	0.000181444	AAEL008105	glutamate cysteine ligase [Source:VB Community Annotation]			GO:0003824,GO:0004357,GO:0006750	catalytic activity,glutamate-cysteine ligase activity,glutathione biosynthetic process
LOC5579906	688.864	0.66161	0.143508	4.61028	4.0213e-06	0.000183278	AAEL001037	ribosomal RNA methyltransferase [Source:VB Community Annotation]			GO:0000453,GO:0001510,GO:0005634,GO:0005730,GO:0006364,GO:0008168,GO:0008649,GO:0016740,GO:0031167,GO:0032259,GO:0042254	enzyme-directed rRNA 2'-O-methylation,RNA methylation,nucleus,nucleolus,rRNA processing,methyltransferase activity,rRNA methyltransferase activity,transferase activity,rRNA methylation,methylation,ribosome biogenesis
LOC5573328	790.118	0.792045	0.171817	4.60981	4.03033e-06	0.000183278	AAEL010411	dual specificity protein phosphatase [Source:VB Community Annotation]			GO:0004721,GO:0004725,GO:0006470,GO:0008138,GO:0016311,GO:0016787,GO:0016791,GO:0035335	phosphoprotein phosphatase activity,protein tyrosine phosphatase activity,protein dephosphorylation,protein tyrosine/serine/threonine phosphatase activity,dephosphorylation,hydrolase activity,phosphatase activity,peptidyl-tyrosine dephosphorylation
LOC5579903	595.483	1.27729	0.277207	4.60772	4.07103e-06	0.000184212	AAEL001022	anterior fat body protein [Source:VB Community Annotation]
LOC5575307	2841.09	-0.671206	0.145701	-4.60675	4.0902e-06	0.000184212	AAEL002625				GO:0005576,GO:0006030,GO:0008061	extracellular region,chitin metabolic process,chitin binding
LOC5564750	630.39	-0.747952	0.162363	-4.60667	4.09178e-06	0.000184212	AAEL014614	cytochrome P450 [Source:VB Community Annotation]			GO:0004497,GO:0005506,GO:0016020,GO:0016021,GO:0016491,GO:0016705,GO:0020037,GO:0046872,GO:0055114	monooxygenase activity,iron ion binding,membrane,integral component of membrane,oxidoreductase activity,oxidoreductase activity, acting on paired donors, with incorporation or reduction of molecular oxygen,heme binding,metal ion binding,oxidation-reduction process
LOC110676874	88.0963	-3.9007	0.847345	-4.60343	4.15579e-06	0.000186472	AAEL027210
LOC5568697	956.876	-1.02946	0.223701	-4.60196	4.1853e-06	0.000186757	AAEL007068	lipase [Source:VB Community Annotation]			GO:0004806,GO:0005576,GO:0006629,GO:0008970,GO:0052689	triglyceride lipase activity,extracellular region,lipid metabolic process,phospholipase A1 activity,carboxylic ester hydrolase activity
LOC5572439	127.37	-1.00558	0.218546	-4.60121	4.20037e-06	0.000186757	AAEL001822	glucosyl/glucuronosyl transferases [Source:VB Community Annotation]			GO:0008194,GO:0015020,GO:0016020,GO:0016021,GO:0016740,GO:0016757,GO:0016758	UDP-glycosyltransferase activity,glucuronosyltransferase activity,membrane,integral component of membrane,transferase activity,transferase activity, transferring glycosyl groups,transferase activity, transferring hexosyl groups
LOC5577690	78.5145	-2.71811	0.590758	-4.60105	4.20362e-06	0.000186757	AAEL013323
LOC5565066	6888.2	-0.613518	0.133388	-4.59949	4.23532e-06	0.000187037	AAEL004580	beta-galactosidase [Source:VB Community Annotation]			GO:0004553,GO:0004565,GO:0005975,GO:0008152,GO:0016020,GO:0016021,GO:0016787,GO:0016798	hydrolase activity, hydrolyzing O-glycosyl compounds,beta-galactosidase activity,carbohydrate metabolic process,metabolic process,membrane,integral component of membrane,hydrolase activity,hydrolase activity, acting on glycosyl bonds
LOC5574290	2420.06	-0.504525	0.109694	-4.59937	4.23761e-06	0.000187037	AAEL011051	porcupine [Source:VB Community Annotation]			GO:0016020,GO:0016021	membrane,integral component of membrane
LOC5573067	1437.78	0.943772	0.205718	4.58771	4.48135e-06	0.00019715	AAEL010248	fibrillarin [Source:VB Community Annotation]			GO:0003723,GO:0006364,GO:0008168,GO:0016740,GO:0032259	RNA binding,rRNA processing,methyltransferase activity,transferase activity,methylation
LOC5570975	17.7138	-4.69526	1.02364	-4.58682	4.50046e-06	0.000197348	AAEL008711
LOC110676546	66.5862	-1.36153	0.297042	-4.58362	4.57001e-06	0.000199749	AAEL020688
LOC110675398	311.357	-6.11333	1.33539	-4.57793	4.69607e-06	0.000204597	AAEL026396
LOC5578487	596.529	0.645944	0.141121	4.57722	4.71197e-06	0.00020463	AAEL003552	DNA-directed RNA polymerase subunit rpb6 [Source:VB Community Annotation]			GO:0003677,GO:0003899,GO:0005634,GO:0005665,GO:0006351	DNA binding,DNA-directed 5'-3' RNA polymerase activity,nucleus,RNA polymerase II, core complex,transcription, DNA-templated
LOC110678009	36.6434	-1.84533	0.403265	-4.57597	4.74017e-06	0.000205195	AAEL026859
LOC110679115	433.436	-0.891382	0.194892	-4.57371	4.79153e-06	0.000206103	AAEL024567
LOC5570013	199.683	0.834671	0.182516	4.57315	4.80446e-06	0.000206103	AAEL000173	chromatin assembly factor-I p150 subunit, putative [Source:VB Community Annotation]			GO:0005634	nucleus
LOC5570863	367.458	0.642217	0.140435	4.57304	4.80693e-06	0.000206103	AAEL019463				GO:0000166,GO:0005524,GO:0016020,GO:0016021,GO:0016887	nucleotide binding,ATP binding,membrane,integral component of membrane,ATPase activity
LOC110674849	40.2115	-2.04955	0.448999	-4.5647	5.00209e-06	0.000213792	AAEL020094
LOC5570053	601.89	-0.61245	0.134219	-4.56306	5.04136e-06	0.00021479	AAEL000204
LOC110676558	58.4115	-3.9127	0.857725	-4.56172	5.07374e-06	0.00021549	AAEL023929
LOC110681143	211.395	-0.701215	0.153826	-4.55849	5.1522e-06	0.000218137	AAEL023181				GO:0016020,GO:0016021	membrane,integral component of membrane
LOC5575238	5693.18	0.705488	0.154931	4.55356	5.27467e-06	0.000222532	AAEL011708	heat shock protein [Source:VB Community Annotation]			GO:0000166,GO:0005524,GO:0006457,GO:0051082	nucleotide binding,ATP binding,protein folding,unfolded protein binding
LOC5575513	4133.14	-0.735132	0.161461	-4.55299	5.28896e-06	0.000222532	AAEL011888	serine-type enodpeptidase, [Source:VB Community Annotation]			GO:0004252,GO:0006508	serine-type endopeptidase activity,proteolysis
LOC5572935	211.561	-0.69824	0.153556	-4.54714	5.43791e-06	0.000228088	AAEL010157	microsomal glutathione s-transferase [Source:VB Community Annotation]			GO:0016020,GO:0016021	membrane,integral component of membrane
LOC5566107	1850.8	0.900258	0.19842	4.53714	5.70218e-06	0.000237968	AAEL005199	Carboxylic ester hydrolase [Source:UniProtKB/TrEMBL;Acc:A0A1S4F9U8]			GO:0016787,GO:0052689	hydrolase activity,carboxylic ester hydrolase activity
LOC110679410	123.504	0.912718	0.201205	4.53627	5.72585e-06	0.000237968	AAEL020778
LOC5572762	434.886	0.801183	0.176618	4.53625	5.72644e-06	0.000237968	AAEL027479				GO:0005515,GO:0005634	protein binding,nucleus
LOC23687857	1994.98	0.502622	0.110817	4.5356	5.74393e-06	0.000237968	AAEL017437				GO:0005634,GO:0005730,GO:0042254	nucleus,nucleolus,ribosome biogenesis
LOC110675803	165.729	-1.02101	0.225411	-4.52956	5.91069e-06	0.000244128	AAEL023679				GO:0004842,GO:0005515,GO:0016567	ubiquitin-protein transferase activity,protein binding,protein ubiquitination
LOC5569239	174.869	-0.995014	0.219762	-4.52769	5.96316e-06	0.000245544	AAEL007495	phosphoglycerate mutase [Source:VB Community Annotation]			GO:0004619,GO:0006096,GO:0016853,GO:0016868	phosphoglycerate mutase activity,glycolytic process,isomerase activity,intramolecular transferase activity, phosphotransferases
LOC5570258	475.253	0.832389	0.183942	4.52529	6.03132e-06	0.000247596	AAEL008220
LOC5575846	1074.28	0.647481	0.14331	4.51805	6.24123e-06	0.000255437	AAEL012119				GO:0003676,GO:0003723	nucleic acid binding,RNA binding
LOC5577716	363.474	1.50567	0.333369	4.51653	6.28611e-06	0.000256496	AAEL013347	lethal(2)essential for life protein, l2efl [Source:VB Community Annotation]			GO:0046872	metal ion binding
LOC110676966	119.251	1.1984	0.265885	4.5072	6.56893e-06	0.000266426	AAEL026610				GO:0003810,GO:0018149	protein-glutamine gamma-glutamyltransferase activity,peptide cross-linking
LOC110681051	119.251	1.1984	0.265885	4.5072	6.56893e-06	0.000266426	AAEL022582				GO:0003810,GO:0018149	protein-glutamine gamma-glutamyltransferase activity,peptide cross-linking
LOC5578184	825.813	0.775593	0.172829	4.48763	7.20186e-06	0.000291222	AAEL003469	NHP2 protein, putative [Source:VB Community Annotation]
LOC5574170	260.533	1.0365	0.231125	4.48459	7.30532e-06	0.000294225	AAEL002301	serine protease [Source:VB Community Annotation]			GO:0004252,GO:0006508	serine-type endopeptidase activity,proteolysis
LOC5573308	57.9588	1.95507	0.435992	4.48417	7.31967e-06	0.000294225	AAEL010396	secreted ferritin G subunit precursor, putative [Source:VB Community Annotation]			GO:0004322,GO:0005623,GO:0006826,GO:0006879,GO:0008199,GO:0016491,GO:0046872,GO:0055114	ferroxidase activity,obsolete cell,iron ion transport,cellular iron ion homeostasis,ferric iron binding,oxidoreductase activity,metal ion binding,oxidation-reduction process
LOC23687735	5108.67	0.432138	0.096515	4.47742	7.55512e-06	0.000302788	AAEL017315				GO:0000166,GO:0005524	nucleotide binding,ATP binding
LOC5570581	446.102	0.722878	0.16148	4.47657	7.58506e-06	0.000303088	AAEL008393	phosphatidylserine synthase [Source:VB Community Annotation]			GO:0005783,GO:0005789,GO:0006629,GO:0006659,GO:0016020,GO:0016021,GO:0016740,GO:0106245	endoplasmic reticulum,endoplasmic reticulum membrane,lipid metabolic process,phosphatidylserine biosynthetic process,membrane,integral component of membrane,transferase activity,L-serine-phosphatidylethanolamine phosphatidyltransferase activity
LOC5570223	155.887	-1.08578	0.242764	-4.47255	7.72905e-06	0.000307931	AAEL008157
LOC5565118	2200.06	0.642466	0.143783	4.46832	7.88373e-06	0.00031317	AAEL014734				GO:0003824,GO:0008152,GO:0016491,GO:0033512,GO:0047130,GO:0047131,GO:0055114	catalytic activity,metabolic process,oxidoreductase activity,L-lysine catabolic process to acetyl-CoA via saccharopine,saccharopine dehydrogenase (NADP+, L-lysine-forming) activity,saccharopine dehydrogenase (NAD+, L-glutamate-forming) activity,oxidation-reduction process
LOC5565483	341.131	-1.20645	0.270173	-4.46548	7.98877e-06	0.000316411	AAEL004821	potassium-dependent sodium-calcium exchanger, putative [Source:VB Community Annotation]			GO:0006816,GO:0015297,GO:0016020,GO:0016021,GO:0055085	calcium ion transport,antiporter activity,membrane,integral component of membrane,transmembrane transport
LOC5572918	61.2856	2.24491	0.503321	4.4602	8.18827e-06	0.000323365	AAEL010139	serine protease, putative [Source:VB Community Annotation]
LOC5572415	204.759	-2.88963	0.649124	-4.45158	8.5241e-06	0.000335646	AAEL009783	cuticle protein, putative [Source:VB Community Annotation]			GO:0042302	structural constituent of cuticle
LOC5566830	39.5032	-3.35605	0.754377	-4.44876	8.63661e-06	0.000339087	AAEL005668
LOC5574006	120.831	0.94641	0.213505	4.43273	9.30469e-06	0.000364258	AAEL010853	AMP dependent ligase [Source:VB Community Annotation]			GO:0003824	catalytic activity
LOC5575085	4645.05	-0.585912	0.132333	-4.42757	9.52995e-06	0.000371998	AAEL011641	transferrin [Source:VB Community Annotation]			GO:0005615,GO:0016020,GO:0016021	extracellular space,membrane,integral component of membrane
LOC5572005	488.466	0.760071	0.171776	4.42477	9.65453e-06	0.000375776	AAEL009475	carbamoyl-phosphate synthase large chain [Source:VB Community Annotation]			GO:0000166,GO:0003824,GO:0004070,GO:0004088,GO:0004151,GO:0005524,GO:0006207,GO:0006221,GO:0006520,GO:0006541,GO:0006807,GO:0008152,GO:0016597,GO:0016740,GO:0016743,GO:0016787,GO:0016810,GO:0016812,GO:0016874,GO:0044205,GO:0046872	nucleotide binding,catalytic activity,aspartate carbamoyltransferase activity,carbamoyl-phosphate synthase (glutamine-hydrolyzing) activity,dihydroorotase activity,ATP binding,'de novo' pyrimidine nucleobase biosynthetic process,pyrimidine nucleotide biosynthetic process,cellular amino acid metabolic process,glutamine metabolic process,nitrogen compound metabolic process,metabolic process,amino a…
LOC5571787	1782.98	-1.07754	0.243672	-4.42209	9.77519e-06	0.000379379	AAEL023559				GO:0004180,GO:0006508,GO:0008233,GO:0008237,GO:0008241,GO:0016020,GO:0016021,GO:0016787,GO:0046872	carboxypeptidase activity,proteolysis,peptidase activity,metallopeptidase activity,peptidyl-dipeptidase activity,membrane,integral component of membrane,hydrolase activity,metal ion binding
LOC5576921	435.863	0.758265	0.171592	4.41901	9.91558e-06	0.000383724	AAEL012859
LOC5567396	2929.78	-0.544477	0.123272	-4.41689	1.00132e-05	0.000386394	AAEL006053				GO:0016020,GO:0016021	membrane,integral component of membrane
LOC110676294	97.4453	-1.5691	0.355359	-4.41554	1.0076e-05	0.000387709	AAEL003712	C-Type Lysozyme (Lys-E). [Source:VB Community Annotation]	LYSC10		GO:0003796	lysozyme activity
LOC5564683	10.7398	5.89131	1.33561	4.41093	1.02926e-05	0.000394499	AAEL004388	heme peroxidase [Source:VB Community Annotation]	HPX8A		GO:0004601,GO:0006979,GO:0020037,GO:0048477,GO:0055114,GO:0098869	peroxidase activity,response to oxidative stress,heme binding,oogenesis,oxidation-reduction process,cellular oxidant detoxification
LOC5576023	230.7	0.765048	0.173459	4.41055	1.03108e-05	0.000394499	AAEL012260	WD-repeat protein [Source:VB Community Annotation]			GO:0005515,GO:0005634,GO:0006364,GO:0034511	protein binding,nucleus,rRNA processing,U3 snoRNA binding
LOC5572124	4013.87	-0.900588	0.204294	-4.40829	1.04192e-05	0.000397518	AAEL009537				GO:0005576,GO:0006030,GO:0008061	extracellular region,chitin metabolic process,chitin binding
LOC110675399	25.3657	-4.37313	0.993746	-4.40065	1.07927e-05	0.000410611	AAEL022796
LOC5567883	1496.97	-0.923875	0.210067	-4.39799	1.09257e-05	0.000414502	AAEL006353	sulfotransferase (sult) [Source:VB Community Annotation]			GO:0008146	sulfotransferase activity
LOC5574009	1066.82	1.73681	0.395108	4.39579	1.10369e-05	0.000417547	AAEL010858	AMP dependent ligase [Source:VB Community Annotation]			GO:0003824	catalytic activity
LOC110680935	119.066	-1.23377	0.280817	-4.39348	1.11551e-05	0.000420841	AAEL027836				GO:0005515	protein binding
LOC5568168	379.241	0.601698	0.13704	4.39067	1.13001e-05	0.000425123	AAEL006610				GO:0005515	protein binding
LOC5580212	167.038	-1.75298	0.399309	-4.39005	1.13326e-05	0.000425161	AAEL011926	brachyury [Source:VB Community Annotation]			GO:0003677,GO:0003700,GO:0005634,GO:0006355	DNA binding,DNA-binding transcription factor activity,nucleus,regulation of transcription, DNA-templated
LOC5573494	1355.44	0.468234	0.106693	4.3886	1.14084e-05	0.000426179	AAEL027554				GO:0046872	metal ion binding
LOC5574590	2078.56	-0.706886	0.161083	-4.38832	1.14228e-05	0.000426179	AAEL002416	short-chain dehydrogenase [Source:VB Community Annotation]			GO:0005777,GO:0055114	peroxisome,oxidation-reduction process
LOC5570511	252.818	0.703356	0.160309	4.38749	1.14664e-05	0.000426413	AAEL001412				GO:0003725	double-stranded RNA binding
LOC5564918	388.713	0.929316	0.211834	4.387	1.14922e-05	0.000426413	AAEL004492	cyclin-dependent kinases regulatory subunit. putative [Source:VB Community Annotation]			GO:0000079,GO:0007049,GO:0016538,GO:0051301	regulation of cyclin-dependent protein serine/threonine kinase activity,cell cycle,cyclin-dependent protein serine/threonine kinase regulator activity,cell division
LOC5577765	3784.93	-1.0461	0.23876	-4.38137	1.17933e-05	0.000436385
LOC5575111	237.739	0.850508	0.194341	4.37637	1.20673e-05	0.000445303	AAEL011658	plasma glutamate carboxypeptidase [Source:VB Community Annotation]			GO:0005764,GO:0005783,GO:0005794,GO:0006508,GO:0016020,GO:0016021,GO:0070573	lysosome,endoplasmic reticulum,Golgi apparatus,proteolysis,membrane,integral component of membrane,metallodipeptidase activity
LOC5569115	33.1656	-2.51317	0.575789	-4.36473	1.27277e-05	0.000468393	AAEL007373	ammonium transporter [Source:VB Community Annotation]			GO:0008519,GO:0015696,GO:0016020,GO:0016021,GO:0072488	ammonium transmembrane transporter activity,ammonium transport,membrane,integral component of membrane,ammonium transmembrane transport
LOC5566166	1671.05	-0.516821	0.118454	-4.36307	1.28252e-05	0.000470697	AAEL005221	internalin A, putative [Source:VB Community Annotation]			GO:0005515	protein binding
LOC5564751	497.196	-0.717671	0.164625	-4.35941	1.30411e-05	0.000477326	AAEL014617	cytochrome P450 [Source:VB Community Annotation]	CYP9J28		GO:0004497,GO:0005506,GO:0016020,GO:0016021,GO:0016491,GO:0016705,GO:0020037,GO:0046872,GO:0055114	monooxygenase activity,iron ion binding,membrane,integral component of membrane,oxidoreductase activity,oxidoreductase activity, acting on paired donors, with incorporation or reduction of molecular oxygen,heme binding,metal ion binding,oxidation-reduction process
LOC5573480	361.214	-0.700342	0.160872	-4.35341	1.34037e-05	0.000489272	AAEL010524				GO:0005125,GO:0005164,GO:0005515,GO:0005615,GO:0006955,GO:0007165,GO:0016020,GO:0016021	cytokine activity,tumor necrosis factor receptor binding,protein binding,extracellular space,immune response,signal transduction,membrane,integral component of membrane
LOC5564914	204.984	-1.74211	0.400242	-4.35264	1.3451e-05	0.000489675	AAEL014655
LOC23687754	900.943	1.27782	0.293695	4.35085	1.35609e-05	0.000491059	AAEL017334				GO:0005576,GO:0006030,GO:0008061	extracellular region,chitin metabolic process,chitin binding
LOC5574607	514.585	-0.890631	0.204749	-4.34986	1.36224e-05	0.000491059	AAEL002412	monocarboxylate transporter [Source:VB Community Annotation]			GO:0016020,GO:0016021,GO:0022857,GO:0055085	membrane,integral component of membrane,transmembrane transporter activity,transmembrane transport
LOC5578343	2232.31	0.659824	0.151694	4.3497	1.36322e-05	0.000491059	AAEL003514	centromere/microtubule binding protein cbf5 [Source:VB Community Annotation]			GO:0001522,GO:0003723,GO:0006396,GO:0009451,GO:0009982,GO:0016853	pseudouridine synthesis,RNA binding,RNA processing,RNA modification,pseudouridine synthase activity,isomerase activity
LOC5571323	118.608	0.887934	0.204151	4.34939	1.36517e-05	0.000491059	AAEL008941				GO:0008168,GO:0016740,GO:0030488,GO:0032259,GO:0052905	methyltransferase activity,transferase activity,tRNA methylation,methylation,tRNA (guanine(9)-N(1))-methyltransferase activity
LOC110674097	11.995	-4.09805	0.942279	-4.34908	1.36708e-05	0.000491059	AAEL027763				GO:0004462,GO:0016829,GO:0046872	lactoylglutathione lyase activity,lyase activity,metal ion binding
LOC5564206	248.398	-2.32627	0.535148	-4.34696	1.38037e-05	0.000493262	AAEL014357
LOC5571671	5.80202	5.99018	1.3781	4.34671	1.38197e-05	0.000493262	AAEL001650
LOC5564415	1198.74	0.905088	0.208241	4.34636	1.38417e-05	0.000493262	AAEL014426	glycine dehydrogenase [Source:VB Community Annotation]			GO:0003824,GO:0004375,GO:0005739,GO:0006544,GO:0006546,GO:0016491,GO:0055114	catalytic activity,glycine dehydrogenase (decarboxylating) activity,mitochondrion,glycine metabolic process,glycine catabolic process,oxidoreductase activity,oxidation-reduction process
LOC5577011	292.104	0.637419	0.146733	4.34407	1.39866e-05	0.000497112	AAEL012924	mitochondrial ribosomal protein, S24, putative [Source:VB Community Annotation]	mRpS24		GO:0005739	mitochondrion
LOC5573704	2352.97	0.507547	0.116979	4.33878	1.43275e-05	0.000506669	AAEL010698	importin beta-4 [Source:VB Community Annotation]			GO:0005515,GO:0005634,GO:0005737,GO:0006606,GO:0006886,GO:0008536,GO:0015031	protein binding,nucleus,cytoplasm,protein import into nucleus,intracellular protein transport,Ran GTPase binding,protein transport
LOC5575504	1062.31	0.521515	0.120211	4.33833	1.43573e-05	0.000506669	AAEL011890
LOC110678739	5332.71	-0.77796	0.179329	-4.33816	1.4368e-05	0.000506669	AAEL009543				GO:0005576,GO:0008061	extracellular region,chitin binding
LOC5569739	7607.83	-0.70525	0.163362	-4.3171	1.58091e-05	0.000555588	AAEL007881				GO:0006464,GO:0009249	cellular protein modification process,protein lipoylation
LOC5576656	718.509	-1.22888	0.284681	-4.31671	1.58375e-05	0.000555588	AAEL012680	juvenile hormone-inducible protein, putative [Source:VB Community Annotation]
LOC5565997	780.228	-4.67979	1.08522	-4.31231	1.61557e-05	0.000565283	AAEL009588	expressed protein (HR3) [Source:VB Community Annotation]			GO:0003677,GO:0003700,GO:0003707,GO:0004879,GO:0005634,GO:0006355,GO:0008270,GO:0030522,GO:0042025,GO:0043565,GO:0046872	DNA binding,DNA-binding transcription factor activity,steroid hormone receptor activity,nuclear receptor activity,nucleus,regulation of transcription, DNA-templated,zinc ion binding,intracellular receptor signaling pathway,host cell nucleus,sequence-specific DNA binding,metal ion binding
LOC5571987	186.175	-0.780448	0.181563	-4.29849	1.71964e-05	0.00060014	AAEL009463				GO:0016020,GO:0016021,GO:0016192	membrane,integral component of membrane,vesicle-mediated transport
LOC110675866	10.6618	3.57425	0.831861	4.29669	1.73365e-05	0.000603471	AAEL023302
LOC5573071	816.476	-0.752527	0.175319	-4.29232	1.76814e-05	0.000613893	AAEL010265
LOC5578584	175.903	-2.71054	0.631814	-4.29008	1.78605e-05	0.000618525	AAEL013770	zinc finger protein [Source:VB Community Annotation]			GO:0003676,GO:0005515,GO:0005634	nucleic acid binding,protein binding,nucleus
LOC5577637	73.4353	-1.15052	0.268332	-4.28769	1.8054e-05	0.000623626	AAEL003237	low molecular weight protein-tyrosine-phosphatase [Source:VB Community Annotation]			GO:0003993,GO:0004725,GO:0004726,GO:0005737,GO:0006470,GO:0016787,GO:0035335	acid phosphatase activity,protein tyrosine phosphatase activity,non-membrane spanning protein tyrosine phosphatase activity,cytoplasm,protein dephosphorylation,hydrolase activity,peptidyl-tyrosine dephosphorylation
LOC5577801	572.967	-0.869584	0.202942	-4.28489	1.82833e-05	0.000629934	AAEL013385	brain chitinase and chia [Source:VB Community Annotation]			GO:0004553,GO:0005975,GO:0008061,GO:0008152,GO:0016787,GO:0016798	hydrolase activity, hydrolyzing O-glycosyl compounds,carbohydrate metabolic process,chitin binding,metabolic process,hydrolase activity,hydrolase activity, acting on glycosyl bonds
LOC5570566	38.4378	-1.48482	0.347067	-4.27819	1.88415e-05	0.000647515	AAEL008384	ATP-binding cassette sub-family A member 3, putative [Source:VB Community Annotation]			GO:0000166,GO:0005524,GO:0016020,GO:0016021,GO:0016887,GO:0042626,GO:0055085	nucleotide binding,ATP binding,membrane,integral component of membrane,ATPase activity,ATPase-coupled transmembrane transporter activity,transmembrane transport
LOC5576906	455.135	0.659058	0.154352	4.26985	1.95607e-05	0.000670524	AAEL012851	WD-repeat protein [Source:VB Community Annotation]			GO:0005515	protein binding
LOC5568103	3771.03	-0.426771	0.100107	-4.26317	2.01547e-05	0.000689137	AAEL006538	peroxisomal membrane protein 2, pxmp2 [Source:VB Community Annotation]			GO:0016020,GO:0016021	membrane,integral component of membrane
LOC5576799	2602.35	-0.984183	0.230937	-4.26169	2.02886e-05	0.000691964	AAEL012776	protease m1 zinc metalloprotease [Source:VB Community Annotation]			GO:0004177,GO:0006508,GO:0008233,GO:0008237,GO:0008270,GO:0016787,GO:0046872	aminopeptidase activity,proteolysis,peptidase activity,metallopeptidase activity,zinc ion binding,hydrolase activity,metal ion binding
LOC5574995	370.67	0.579894	0.136108	4.26055	2.03925e-05	0.000693757	AAEL002523	mitochondrial inner membrane protein translocase, 9kD-subunit, putative [Source:VB Community Annotation]			GO:0005739,GO:0015031,GO:0046872	mitochondrion,protein transport,metal ion binding
LOC5575648	240.546	0.698815	0.164052	4.25972	2.04686e-05	0.000694596	AAEL014265
LOC5571188	1773.39	-1.30952	0.307531	-4.25818	2.06101e-05	0.000697644	AAEL008879	Kynurenine 3-monooxygenase (EC 1.14.13.9)(Kynurenine 3-hydroxylase) [Source:VB Community Annotation]			GO:0004497,GO:0004502,GO:0005739,GO:0005741,GO:0006569,GO:0009435,GO:0016020,GO:0016021,GO:0016491,GO:0019363,GO:0019674,GO:0019805,GO:0031966,GO:0034354,GO:0043420,GO:0050660,GO:0055114,GO:0071949	monooxygenase activity,kynurenine 3-monooxygenase activity,mitochondrion,mitochondrial outer membrane,tryptophan catabolic process,NAD biosynthetic process,membrane,integral component of membrane,oxidoreductase activity,pyridine nucleotide biosynthetic process,NAD metabolic process,quinolinate biosynthetic process,mitochondrial membrane,'de novo' NAD biosynthetic process from tryptophan,anthranil…
LOC5576287	1118.83	-0.770687	0.181061	-4.25651	2.07639e-05	0.000701093	AAEL012439	enoyl-CoA hydratase (enoyl hydrase) (unsaturated acyl-CoA hydratase), putative [Source:VB Community Annotation]			GO:0003824	catalytic activity
LOC5567861	732.046	-0.904102	0.212511	-4.25437	2.09641e-05	0.000706086	AAEL006317	short-chain dehydrogenase [Source:VB Community Annotation]			GO:0004454,GO:0006000,GO:0016020,GO:0016021,GO:0046835,GO:0055114	ketohexokinase activity,fructose metabolic process,membrane,integral component of membrane,carbohydrate phosphorylation,oxidation-reduction process
LOC110676625	18.7295	-5.77346	1.3595	-4.24675	2.16891e-05	0.000728688	AAEL024839
LOC110680319	133.768	0.826347	0.194718	4.24382	2.19748e-05	0.000736456	AAEL027140
LOC5579988	61.7955	-2.10368	0.495957	-4.24165	2.21878e-05	0.000741755	AAEL001732	candidate tumor suppressor protein [Source:VB Community Annotation]			GO:0008299,GO:0016740	isoprenoid biosynthetic process,transferase activity
LOC5580247	1552.71	0.794819	0.187414	4.24098	2.22546e-05	0.000742148	AAEL012545	Proliferating cell nuclear antigen [Source:UniProtKB/TrEMBL;Acc:Q4PKD7]			GO:0003677,GO:0005634,GO:0006259,GO:0006260,GO:0006275,GO:0030337	DNA binding,nucleus,DNA metabolic process,DNA replication,regulation of DNA replication,DNA polymerase processivity factor activity
LOC5577747	509.032	0.636556	0.150183	4.23853	2.24991e-05	0.000748455	AAEL003293	GTP-binding protein [Source:VB Community Annotation]			GO:0000166,GO:0005525,GO:0005634,GO:0005730	nucleotide binding,GTP binding,nucleus,nucleolus
LOC5579202	603.967	-0.604713	0.14273	-4.23675	2.26774e-05	0.000752532	AAEL021395				GO:0042578	phosphoric ester hydrolase activity
LOC5570135	3166.39	0.561453	0.132905	4.22446	2.39509e-05	0.000792063	AAEL008106
LOC5569644	177.612	-0.775689	0.183633	-4.22414	2.39859e-05	0.000792063	AAEL007792				GO:0016020,GO:0016021	membrane,integral component of membrane
LOC5565434	30.6391	1.56586	0.370803	4.22289	2.41195e-05	0.000794531	AAEL000650				GO:0005515	protein binding
LOC5565421	314.175	0.736014	0.174585	4.21579	2.48903e-05	0.000817928	AAEL000674	RNA m5u methyltransferase [Source:VB Community Annotation]			GO:0001510,GO:0003676,GO:0006396,GO:0008168,GO:0008173,GO:0016740,GO:0032259	RNA methylation,nucleic acid binding,RNA processing,methyltransferase activity,RNA methyltransferase activity,transferase activity,methylation
LOC5574467	33.8734	-2.18332	0.518094	-4.21415	2.50722e-05	0.000821905	AAEL002373	juvenile hormone-inducible protein, putative [Source:VB Community Annotation]
LOC5579630	25.6013	-1.81982	0.432136	-4.21123	2.53985e-05	0.000830586	AAEL022674
LOC5571793	131.605	0.836711	0.198932	4.20601	2.59918e-05	0.000847935	AAEL027140				GO:0016020,GO:0016021	membrane,integral component of membrane
LOC5577436	284.04	-0.706147	0.167947	-4.20458	2.61564e-05	0.000851248	AAEL013182	ATP-dependent RNA helicase [Source:VB Community Annotation]			GO:0000166,GO:0003676,GO:0003724,GO:0004386,GO:0005515,GO:0005524,GO:0046872	nucleotide binding,nucleic acid binding,RNA helicase activity,helicase activity,protein binding,ATP binding,metal ion binding
LOC5567506	501.347	-0.939584	0.223552	-4.20297	2.63436e-05	0.000854289	AAEL006113	cystinosin [Source:VB Community Annotation]			GO:0016020,GO:0016021	membrane,integral component of membrane
LOC5569921	674.319	-0.620534	0.147652	-4.20269	2.63763e-05	0.000854289	AAEL008021	specifically Rac-associated protein, putative [Source:VB Community Annotation]			GO:0005737,GO:0030833,GO:0048365	cytoplasm,regulation of actin filament polymerization,Rac GTPase binding
LOC23687944	808.613	-0.647339	0.154079	-4.20135	2.65328e-05	0.000857301	AAEL017524				GO:0004656,GO:0005506,GO:0005515,GO:0005783,GO:0005788,GO:0016491,GO:0016702,GO:0016705,GO:0019511,GO:0031418,GO:0046872,GO:0051213,GO:0055114	procollagen-proline 4-dioxygenase activity,iron ion binding,protein binding,endoplasmic reticulum,endoplasmic reticulum lumen,oxidoreductase activity,oxidoreductase activity, acting on single donors with incorporation of molecular oxygen, incorporation of two atoms of oxygen,oxidoreductase activity, acting on paired donors, with incorporation or reduction of molecular oxygen,peptidyl-proline hydr…
LOC23687880	23154.5	-0.688237	0.163935	-4.19824	2.68997e-05	0.000867081	AAEL017460	Angiotensin-converting enzyme [Source:UniProtKB/TrEMBL;Acc:A0A1S4G6D0]			GO:0004180,GO:0006508,GO:0008233,GO:0008237,GO:0008241,GO:0016020,GO:0016787,GO:0046872	carboxypeptidase activity,proteolysis,peptidase activity,metallopeptidase activity,peptidyl-dipeptidase activity,membrane,hydrolase activity,metal ion binding
LOC5570810	4886.2	-0.523234	0.124708	-4.19568	2.72048e-05	0.000874829	AAEL008574	acyl-CoA oxidase [Source:VB Community Annotation]			GO:0003997,GO:0005777,GO:0006629,GO:0006631,GO:0006635,GO:0016491,GO:0016627,GO:0050660,GO:0055114,GO:0071949	acyl-CoA oxidase activity,peroxisome,lipid metabolic process,fatty acid metabolic process,fatty acid beta-oxidation,oxidoreductase activity,oxidoreductase activity, acting on the CH-CH group of donors,flavin adenine dinucleotide binding,oxidation-reduction process,FAD binding
LOC5572323	1926.56	-0.422691	0.100872	-4.19035	2.78526e-05	0.000893533	AAEL009706	ns1 binding protein [Source:VB Community Annotation]			GO:0003779,GO:0005515	actin binding,protein binding
LOC5576699	697.17	0.708338	0.16916	4.18738	2.82196e-05	0.000903161	AAEL012725				GO:0005634	nucleus
LOC5579803	72.1251	1.36994	0.327301	4.18555	2.8448e-05	0.000906397	AAEL003967	calpain 4, 6, 7, invertebrate [Source:VB Community Annotation]			GO:0004198,GO:0006508	calcium-dependent cysteine-type endopeptidase activity,proteolysis
LOC5576118	1736.95	-0.532883	0.127317	-4.18549	2.84549e-05	0.000906397	AAEL002817				GO:0005515	protein binding
LOC5571110	263.677	-0.909932	0.217542	-4.18279	2.8795e-05	0.000913807	AAEL001532	FAD NAD binding oxidoreductases [Source:VB Community Annotation]			GO:0046872	metal ion binding
LOC5572635	4806.49	-1.37355	0.328426	-4.18221	2.88683e-05	0.000913807	AAEL001839	zinc carboxypeptidase [Source:VB Community Annotation]			GO:0004180,GO:0004181,GO:0006508,GO:0008233,GO:0008237,GO:0008270,GO:0016787,GO:0046872	carboxypeptidase activity,metallocarboxypeptidase activity,proteolysis,peptidase activity,metallopeptidase activity,zinc ion binding,hydrolase activity,metal ion binding
LOC5575148	304.832	-0.953134	0.227911	-4.18204	2.88905e-05	0.000913807	AAEL000334	villin [Source:VB Community Annotation]			GO:0003779,GO:0007010,GO:0007015,GO:0007300,GO:0051015	actin binding,cytoskeleton organization,actin filament organization,ovarian nurse cell to oocyte transport,actin filament binding
LOC5565044	525.718	-0.530788	0.1272	-4.17286	3.00804e-05	0.00094922	AAEL004579	short-chain dehydrogenase [Source:VB Community Annotation]			GO:0005515,GO:0055114	protein binding,oxidation-reduction process
LOC5573966	653.569	0.622963	0.149832	4.15773	3.2142e-05	0.00101191	AAEL010827	programmed cell death protein 11 (pre-rRNA processing protein rrp5) [Source:VB Community Annotation]			GO:0003676,GO:0005515,GO:0005730,GO:0006364,GO:0006396	nucleic acid binding,protein binding,nucleolus,rRNA processing,RNA processing
LOC23687686	756.191	-0.579959	0.139518	-4.15687	3.22636e-05	0.00101338	AAEL026659
LOC5568498	2490.45	-0.808158	0.194513	-4.15478	3.25597e-05	0.00101935	AAEL006912	acetyl-coa acetyltransferase 2, [Source:VB Community Annotation]			GO:0003824,GO:0016740,GO:0016746,GO:0016747	catalytic activity,transferase activity,transferase activity, transferring acyl groups,transferase activity, transferring acyl groups other than amino-acyl groups
LOC5566699	2721.94	-1.59173	0.383138	-4.15447	3.26047e-05	0.00101935	AAEL019458				GO:0000166,GO:0005388,GO:0005524,GO:0005886,GO:0006811,GO:0006816,GO:0016020,GO:0016021,GO:0070588	nucleotide binding,calcium transmembrane transporter activity, phosphorylative mechanism,ATP binding,plasma membrane,ion transport,calcium ion transport,membrane,integral component of membrane,calcium ion transmembrane transport
LOC5566067	325.86	-0.829857	0.199862	-4.15214	3.2938e-05	0.00102665	AAEL023653				GO:0003824,GO:0008484,GO:0016020,GO:0016021,GO:0016787	catalytic activity,sulfuric ester hydrolase activity,membrane,integral component of membrane,hydrolase activity
LOC110679479	20.6614	-3.50985	0.845441	-4.1515	3.30306e-05	0.00102665	AAEL022746
LOC23687841	1841.92	0.670549	0.161559	4.1505	3.31757e-05	0.00102665	AAEL017421				GO:0005634,GO:0005730,GO:0042254	nucleus,nucleolus,ribosome biogenesis
LOC5570050	6440.14	0.443579	0.106881	4.15022	3.32158e-05	0.00102665	AAEL000185	eukaryotic translation initiation factor [Source:VB Community Annotation]			GO:0000166,GO:0003743,GO:0005515,GO:0005525,GO:0006412,GO:0006413	nucleotide binding,translation initiation factor activity,protein binding,GTP binding,translation,translational initiation
LOC5564118	2228.13	-0.95062	0.229054	-4.1502	3.32184e-05	0.00102665	AAEL004118	aldo-keto reductase [Source:VB Community Annotation]			GO:0016491,GO:0055114	oxidoreductase activity,oxidation-reduction process
LOC5574204	1756.59	-0.506526	0.122086	-4.14891	3.34055e-05	0.00103008	AAEL002295	leucine-rich transmembrane protein [Source:VB Community Annotation]			GO:0005515,GO:0016020,GO:0016021	protein binding,membrane,integral component of membrane
LOC5574259	1680.07	0.699661	0.168754	4.14603	3.38292e-05	0.00103842	AAEL011032				GO:0042302	structural constituent of cuticle
LOC5568653	639.978	-0.758567	0.182962	-4.14602	3.38298e-05	0.00103842	AAEL006989	cytochrome P450 [Source:VB Community Annotation]	CYP6AG7		GO:0004497,GO:0005506,GO:0016020,GO:0016021,GO:0016491,GO:0016705,GO:0020037,GO:0046872,GO:0055114	monooxygenase activity,iron ion binding,membrane,integral component of membrane,oxidoreductase activity,oxidoreductase activity, acting on paired donors, with incorporation or reduction of molecular oxygen,heme binding,metal ion binding,oxidation-reduction process
LOC110680266	319.991	-0.859769	0.207446	-4.14453	3.40504e-05	0.00104282	AAEL023653
LOC110675526	35.5427	-1.57645	0.382386	-4.12266	3.74517e-05	0.00114439	AAEL021586				GO:0005515	protein binding
LOC5565207	166.085	-1.27737	0.310284	-4.11678	3.8421e-05	0.00116911	AAEL004684				GO:0005737,GO:0120009,GO:0120013	cytoplasm,intermembrane lipid transfer,lipid transfer activity
LOC5564672	195.434	0.881643	0.214162	4.1167	3.84336e-05	0.00116911	AAEL014556				GO:0006144,GO:0016829,GO:0016831,GO:0019428,GO:0019628	purine nucleobase metabolic process,lyase activity,carboxy-lyase activity,allantoin biosynthetic process,urate catabolic process
LOC5569665	1181.14	-0.828833	0.201572	-4.11184	3.92524e-05	0.00119133	AAEL007815	cytochrome P450 [Source:VB Community Annotation]	CYP4D24		GO:0004497,GO:0005506,GO:0016491,GO:0016705,GO:0020037,GO:0046872,GO:0055114	monooxygenase activity,iron ion binding,oxidoreductase activity,oxidoreductase activity, acting on paired donors, with incorporation or reduction of molecular oxygen,heme binding,metal ion binding,oxidation-reduction process
LOC5570460	3461.73	-1.1145	0.271141	-4.11041	3.94958e-05	0.00119472	AAEL008355				GO:0016020,GO:0016021	membrane,integral component of membrane
LOC5574156	116.171	0.858876	0.208965	4.11015	3.95408e-05	0.00119472	AAEL010970				GO:0000462,GO:0005730,GO:0030686,GO:0030688	maturation of SSU-rRNA from tricistronic rRNA transcript (SSU-rRNA, 5.8S rRNA, LSU-rRNA),nucleolus,90S preribosome,preribosome, small subunit precursor
LOC5571028	29.0598	-1.80266	0.439295	-4.10354	4.06872e-05	0.00122661	AAEL008752
LOC5567458	49.4475	1.14635	0.279408	4.1028	4.08174e-05	0.00122779	AAEL000943				GO:0005515	protein binding
LOC5576397	344.796	-0.745289	0.181687	-4.10205	4.09509e-05	0.00122907	AAEL012482				GO:0004842,GO:0016020,GO:0016021,GO:0016567,GO:0046872	ubiquitin-protein transferase activity,membrane,integral component of membrane,protein ubiquitination,metal ion binding
LOC5578108	10.3874	3.88119	0.946739	4.09954	4.13972e-05	0.00123971	AAEL003404
LOC5575489	418.607	0.735315	0.179462	4.09733	4.17938e-05	0.00124882	AAEL011867
LOC5564917	165.15	-1.40213	0.342485	-4.094	4.23997e-05	0.00126413	AAEL026744				GO:0004197,GO:0006508,GO:0006915,GO:0008233,GO:0008234,GO:0016787	cysteine-type endopeptidase activity,proteolysis,apoptotic process,peptidase activity,cysteine-type peptidase activity,hydrolase activity
LOC5576918	413.29	-1.19177	0.291389	-4.08997	4.31424e-05	0.00128344	AAEL012863	Predicted acetyltransferase [Source:UniProtKB/TrEMBL;Acc:Q1HR96]			GO:0008080,GO:0016740	N-acetyltransferase activity,transferase activity
LOC5565497	600.651	0.531221	0.129911	4.08913	4.32998e-05	0.00128529	AAEL004818				GO:0005634	nucleus
LOC110674119	1191.01	-0.810241	0.198233	-4.08732	4.36394e-05	0.00129253	AAEL026582				GO:0005506,GO:0016705,GO:0020037,GO:0055114	iron ion binding,oxidoreductase activity, acting on paired donors, with incorporation or reduction of molecular oxygen,heme binding,oxidation-reduction process
LOC5570522	377.656	0.731972	0.179353	4.08119	4.48064e-05	0.00132419	AAEL001399				GO:0005515,GO:0005634	protein binding,nucleus
LOC5571543	2627.7	-1.79997	0.44135	-4.07832	4.53617e-05	0.0013349	AAEL009131	cytochrome P450 [Source:VB Community Annotation]	CYP6Z8		GO:0004497,GO:0005506,GO:0016491,GO:0016705,GO:0020037,GO:0046872,GO:0055114	monooxygenase activity,iron ion binding,oxidoreductase activity,oxidoreductase activity, acting on paired donors, with incorporation or reduction of molecular oxygen,heme binding,metal ion binding,oxidation-reduction process
LOC5577184	1165.97	-0.653013	0.160119	-4.0783	4.53663e-05	0.0013349	AAEL013063	autophagy related gene [Source:VB Community Annotation]	APG18A		GO:0005515	protein binding
LOC5565989	553.874	0.842532	0.206661	4.07688	4.56436e-05	0.00134013	AAEL026142				GO:0005737,GO:0006693,GO:0016491,GO:0032440,GO:0036132,GO:0047522,GO:0055114	cytoplasm,prostaglandin metabolic process,oxidoreductase activity,2-alkenal reductase [NAD(P)+] activity,13-prostaglandin reductase activity,15-oxoprostaglandin 13-oxidase activity,oxidation-reduction process
LOC5573260	2092.55	-0.444672	0.109152	-4.07389	4.62337e-05	0.00135452	AAEL010359	ATP-dependent transporter [Source:VB Community Annotation]			GO:0000166,GO:0005524,GO:0016887	nucleotide binding,ATP binding,ATPase activity
LOC5570298	90.5553	1.17888	0.28953	4.0717	4.66714e-05	0.00136438	AAEL022132				GO:0004806,GO:0005576,GO:0006629,GO:0052689	triglyceride lipase activity,extracellular region,lipid metabolic process,carboxylic ester hydrolase activity
LOC5571645	3173.36	-0.38677	0.0951007	-4.06695	4.76324e-05	0.00138947	AAEL001636	nuclear transcription factor, x-box binding 1 (nfx1) [Source:VB Community Annotation]			GO:0003676,GO:0003700,GO:0004497,GO:0005634,GO:0006355,GO:0008270,GO:0046872,GO:0055114	nucleic acid binding,DNA-binding transcription factor activity,monooxygenase activity,nucleus,regulation of transcription, DNA-templated,zinc ion binding,metal ion binding,oxidation-reduction process
LOC5571601	19.3812	-2.54312	0.625619	-4.06496	4.80398e-05	0.0013977	AAEL009184				GO:0016020,GO:0016021	membrane,integral component of membrane
LOC5566298	7806.18	0.437598	0.107662	4.06457	4.81216e-05	0.0013977	AAEL000746	NADP-specific isocitrate dehydrogenase [Source:VB Community Annotation]			GO:0000287,GO:0004450,GO:0006097,GO:0006099,GO:0006102,GO:0016491,GO:0016616,GO:0046872,GO:0051287,GO:0055114	magnesium ion binding,isocitrate dehydrogenase (NADP+) activity,glyoxylate cycle,tricarboxylic acid cycle,isocitrate metabolic process,oxidoreductase activity,oxidoreductase activity, acting on the CH-OH group of donors, NAD or NADP as acceptor,metal ion binding,NAD binding,oxidation-reduction process
LOC5571175	1447.17	-1.47198	0.362338	-4.06246	4.85582e-05	0.00140735	AAEL008858	deoxyribonuclease I, putative [Source:VB Community Annotation]			GO:0003676,GO:0016787,GO:0046872	nucleic acid binding,hydrolase activity,metal ion binding
LOC5572304	1040.07	0.729602	0.179745	4.05908	4.9266e-05	0.00142481	AAEL001776				GO:0000981,GO:0003677,GO:0005634,GO:0006355,GO:0006357,GO:0007275,GO:0043565	DNA-binding transcription factor activity, RNA polymerase II-specific,DNA binding,nucleus,regulation of transcription, DNA-templated,regulation of transcription by RNA polymerase II,multicellular organism development,sequence-specific DNA binding
LOC5567008	591.348	-0.66924	0.165509	-4.04353	5.26532e-05	0.00151952	AAEL005754	cgmp-dependent protein kinase [Source:VB Community Annotation]			GO:0000166,GO:0004672,GO:0004674,GO:0004692,GO:0005524,GO:0006468,GO:0016301,GO:0016310,GO:0016740,GO:0030553	nucleotide binding,protein kinase activity,protein serine/threonine kinase activity,cGMP-dependent protein kinase activity,ATP binding,protein phosphorylation,kinase activity,phosphorylation,transferase activity,cGMP binding
LOC5575549	35.3825	1.45208	0.359373	4.0406	5.33153e-05	0.00153534	AAEL002672	Matrix metalloproteinase [Source:UniProtKB/TrEMBL;Acc:A0A1S4F2E3]			GO:0004222,GO:0006508,GO:0008233,GO:0008237,GO:0008270,GO:0016787,GO:0031012,GO:0046872	metalloendopeptidase activity,proteolysis,peptidase activity,metallopeptidase activity,zinc ion binding,hydrolase activity,extracellular matrix,metal ion binding
LOC5575628	310.712	0.707137	0.175081	4.0389	5.37015e-05	0.00154317	AAEL011958
LOC5567785	212.323	0.745624	0.184694	4.03707	5.4124e-05	0.00155202	AAEL000154				GO:0005634	nucleus
LOC5580194	2767.76	-0.392079	0.0972297	-4.0325	5.51861e-05	0.0015781	AAEL002539	fimbrin/plastin [Source:VB Community Annotation]			GO:0003779,GO:0005509,GO:0005515,GO:0051015,GO:0051017	actin binding,calcium ion binding,protein binding,actin filament binding,actin filament bundle assembly
LOC5575143	1290.49	0.78065	0.193606	4.03216	5.52673e-05	0.0015781	AAEL012974	Glycine cleavage system H protein [Source:UniProtKB/TrEMBL;Acc:Q0IE94]			GO:0005739,GO:0005960,GO:0019464	mitochondrion,glycine cleavage complex,glycine decarboxylation via glycine cleavage system
LOC5572669	269.835	0.571306	0.141783	4.02945	5.59087e-05	0.00159304	AAEL001875
LOC5575417	941.636	0.69397	0.172283	4.02809	5.62326e-05	0.0015989	AAEL011811	DNA replication licensing factor MCM3 [Source:VB Community Annotation]			GO:0000166,GO:0003677,GO:0003678,GO:0004386,GO:0005524,GO:0005634,GO:0006260,GO:0006270,GO:0016787,GO:0032508,GO:0042555	nucleotide binding,DNA binding,DNA helicase activity,helicase activity,ATP binding,nucleus,DNA replication,DNA replication initiation,hydrolase activity,DNA duplex unwinding,MCM complex
LOC5565268	480.763	0.74676	0.185418	4.02745	5.63854e-05	0.00159988	AAEL004686	RuvB-like helicase 1 (EC 3.6.4.12) (Pontin) [Source:VB Community Annotation]	pont		GO:0000166,GO:0003678,GO:0003713,GO:0004386,GO:0005524,GO:0005634,GO:0006281,GO:0006310,GO:0006325,GO:0006974,GO:0007049,GO:0016787,GO:0031011,GO:0032508,GO:0035267,GO:0042127,GO:0043139,GO:0043141,GO:0051301,GO:0090263,GO:0097255,GO:1903508	nucleotide binding,DNA helicase activity,transcription coactivator activity,helicase activity,ATP binding,nucleus,DNA repair,DNA recombination,chromatin organization,cellular response to DNA damage stimulus,cell cycle,hydrolase activity,Ino80 complex,DNA duplex unwinding,NuA4 histone acetyltransferase complex,regulation of cell population proliferation,5'-3' DNA helicase activity,GO_0043141,cell …
LOC5568316	122.715	-0.977535	0.243307	-4.0177	5.87698e-05	0.00166403	AAEL024611
LOC5578083	253.435	0.788638	0.196418	4.0151	5.94205e-05	0.00167894	AAEL003413	F-spondin [Source:VB Community Annotation]			GO:0004867,GO:0005576,GO:0007155,GO:0010466,GO:0010951,GO:0030414	serine-type endopeptidase inhibitor activity,extracellular region,cell adhesion,negative regulation of peptidase activity,negative regulation of endopeptidase activity,peptidase inhibitor activity
LOC110676624	20.8943	-5.95023	1.48276	-4.01295	5.99648e-05	0.00169078	AAEL028192
LOC5573072	1437.24	1.21613	0.303126	4.01195	6.02181e-05	0.00169439	AAEL010260				GO:0005886,GO:0016020,GO:0030431,GO:0031225,GO:0032222,GO:0048511,GO:1903818	plasma membrane,membrane,sleep,anchored component of membrane,regulation of synaptic transmission, cholinergic,rhythmic process,positive regulation of voltage-gated potassium channel activity
LOC5571763	6230.9	0.619892	0.154793	4.00464	6.21112e-05	0.00174166	AAEL009287	ran [Source:VB Community Annotation]			GO:0000166,GO:0003924,GO:0005525,GO:0005634,GO:0006913,GO:0015031	nucleotide binding,GTPase activity,GTP binding,nucleus,nucleocytoplasmic transport,protein transport
LOC5567606	710.096	-0.848143	0.211799	-4.00447	6.2156e-05	0.00174166	AAEL006207
LOC5579119	15.3328	-3.40466	0.851077	-4.00041	6.32326e-05	0.00176816	AAEL003840	galectin [Source:VB Community Annotation]	GALE11		GO:0016020,GO:0016021,GO:0030246	membrane,integral component of membrane,carbohydrate binding
LOC5572108	483.291	0.748701	0.187346	3.99635	6.43255e-05	0.001795	AAEL024406				GO:0005515	protein binding
LOC5564756	2641.98	-0.603951	0.151169	-3.9952	6.46401e-05	0.00180006	AAEL014605	cytochrome P450 [Source:VB Community Annotation]	CYP9J9		GO:0004497,GO:0005506,GO:0016020,GO:0016021,GO:0016491,GO:0016705,GO:0020037,GO:0046872,GO:0055114	monooxygenase activity,iron ion binding,membrane,integral component of membrane,oxidoreductase activity,oxidoreductase activity, acting on paired donors, with incorporation or reduction of molecular oxygen,heme binding,metal ion binding,oxidation-reduction process
LOC5569499	340.296	0.739906	0.18523	3.99452	6.48254e-05	0.00180151	AAEL007692				GO:0003677,GO:0005634,GO:0006260	DNA binding,nucleus,DNA replication
LOC110681571	288.117	-0.666512	0.166965	-3.99193	6.55382e-05	0.00181757	AAEL017994
LOC5565259	111.936	-3.06889	0.769016	-3.99068	6.58852e-05	0.00182345	AAEL004703
LOC5572342	79.6664	-1.2876	0.322863	-3.98807	6.66136e-05	0.00183984	AAEL009735	iodotyrosine dehalogenase [Source:VB Community Annotation]			GO:0016020,GO:0016021,GO:0016491,GO:0055114	membrane,integral component of membrane,oxidoreductase activity,oxidation-reduction process
LOC23687872	250.867	-0.871869	0.218668	-3.98719	6.68608e-05	0.0018429	AAEL017452				GO:0016491,GO:0047886,GO:0055114	oxidoreductase activity,farnesol dehydrogenase activity,oxidation-reduction process
LOC5571189	2192.39	-0.870862	0.218595	-3.98391	6.77908e-05	0.00186473	AAEL008878	diacylglycerol o-acyltransferase [Source:VB Community Annotation]			GO:0005783,GO:0005789,GO:0016020,GO:0016021,GO:0016740,GO:0016746,GO:0016747	endoplasmic reticulum,endoplasmic reticulum membrane,membrane,integral component of membrane,transferase activity,transferase activity, transferring acyl groups,transferase activity, transferring acyl groups other than amino-acyl groups
LOC5568674	279.821	-0.703778	0.176693	-3.98305	6.8036e-05	0.00186767	AAEL027019				GO:0006629,GO:0006665,GO:0016787,GO:0017040,GO:0046514,GO:0102121	lipid metabolic process,sphingolipid metabolic process,hydrolase activity,N-acylsphingosine amidohydrolase activity,ceramide catabolic process,ceramidase activity
LOC5571971	24.4865	-1.62842	0.409171	-3.97979	6.89771e-05	0.00188966	AAEL009451	actin [Source:VB Community Annotation]			GO:0005524,GO:0005737,GO:0005856	ATP binding,cytoplasm,cytoskeleton
LOC5572907	372.634	0.662084	0.1665	3.97647	6.99446e-05	0.00191229	AAEL010118	kelch repeat protein [Source:VB Community Annotation]			GO:0005515	protein binding
LOC5564995	160.287	0.815792	0.205204	3.97551	7.02284e-05	0.00191617	AAEL004526				GO:0005515,GO:0005730,GO:0006364,GO:0032040	protein binding,nucleolus,rRNA processing,small-subunit processome
LOC110675277	8.83888	4.67358	1.17588	3.97455	7.05118e-05	0.00192003	AAEL022884
LOC5569212	5875.19	-0.419389	0.105581	-3.97219	7.12149e-05	0.00193527	AAEL019885				GO:0003723	RNA binding
LOC5569826	2848.62	-1.05452	0.265561	-3.9709	7.16019e-05	0.00194188	AAEL001301
LOC5571650	179.49	0.781457	0.196923	3.96834	7.23751e-05	0.00195891	AAEL001632	multicopper oxidase [Source:VB Community Annotation]			GO:0005507,GO:0016491,GO:0046872,GO:0055114	copper ion binding,oxidoreductase activity,metal ion binding,oxidation-reduction process
LOC5566613	641.518	-1.30406	0.329252	-3.96068	7.47351e-05	0.00201875	AAEL000757	anterior fat body protein [Source:VB Community Annotation]
LOC5567920	224.543	-1.169	0.295347	-3.95806	7.55611e-05	0.00203698	AAEL006383	chymotrypsin, putative [Source:VB Community Annotation]			GO:0004252,GO:0006508,GO:0016020,GO:0016021	serine-type endopeptidase activity,proteolysis,membrane,integral component of membrane
LOC5569498	272.599	-0.581502	0.146988	-3.95612	7.61773e-05	0.0020495	AAEL007693	organic anion transporter [Source:VB Community Annotation]			GO:0005515,GO:0016020,GO:0016021,GO:0055085	protein binding,membrane,integral component of membrane,transmembrane transport
LOC5575980	3126.33	0.487911	0.123351	3.95547	7.63839e-05	0.00205098	AAEL012227
LOC5571390	391.825	-0.817924	0.206861	-3.95397	7.68642e-05	0.00205978	AAEL009038	prolylcarboxypeptidase, putative [Source:VB Community Annotation]			GO:0006508,GO:0008236,GO:0016787	proteolysis,serine-type peptidase activity,hydrolase activity
LOC5568843	2828.7	-0.463435	0.117293	-3.9511	7.77923e-05	0.00207881	AAEL007162	autophagy related gene [Source:VB Community Annotation]	APG8		GO:0005737,GO:0006914,GO:0016020	cytoplasm,autophagy,membrane
LOC5575318	228.985	-1.09673	0.277596	-3.95083	7.78822e-05	0.00207881	AAEL027101
LOC5579864	224.78	-0.882738	0.22349	-3.94979	7.82191e-05	0.00208368	AAEL005972
LOC5576629	670.028	-0.643004	0.162956	-3.94588	7.95087e-05	0.00211387	AAEL012658	rgs-gaip interacting protein gipc [Source:VB Community Annotation]			GO:0005515	protein binding
LOC5573162	596.089	1.04444	0.264932	3.9423	8.07052e-05	0.00213867	AAEL002038	protein serine/threonine kinase, putative [Source:VB Community Annotation]
LOC5567650	199.637	-0.990619	0.25129	-3.94214	8.07582e-05	0.00213867	AAEL006238				GO:0016020,GO:0016021	membrane,integral component of membrane
LOC5575933	964.202	-0.656394	0.166555	-3.941	8.11418e-05	0.00214462	AAEL012162	aldehyde dehydrogenase [Source:VB Community Annotation]			GO:0006081,GO:0016020,GO:0016021,GO:0016491,GO:0016620,GO:0055114	cellular aldehyde metabolic process,membrane,integral component of membrane,oxidoreductase activity,oxidoreductase activity, acting on the aldehyde or oxo group of donors, NAD or NADP as acceptor,oxidation-reduction process
LOC5571775	929.461	0.760304	0.192986	3.93969	8.15862e-05	0.00215215	AAEL009291	retinoid-inducible serine carboxypeptidase (serine carboxypeptidase [Source:VB Community Annotation]			GO:0004180,GO:0004185,GO:0006508,GO:0008233,GO:0016787	carboxypeptidase activity,serine-type carboxypeptidase activity,proteolysis,peptidase activity,hydrolase activity
LOC5567109	5761.01	-0.472426	0.119948	-3.93857	8.1967e-05	0.00215799	AAEL005832	programmed cell death [Source:VB Community Annotation]			GO:0005737,GO:0045892	cytoplasm,negative regulation of transcription, DNA-templated
LOC5564797	739.421	0.560657	0.142408	3.93697	8.25175e-05	0.00216825	AAEL004441	importin 9 (imp9) (ran-binding protein 9) [Source:VB Community Annotation]			GO:0005634,GO:0006886,GO:0008536	nucleus,intracellular protein transport,Ran GTPase binding
LOC5568586	1240.74	0.535343	0.136066	3.93444	8.33909e-05	0.00218414	AAEL001101	ATP-dependent transporter [Source:VB Community Annotation]			GO:0000166,GO:0005524,GO:0016887	nucleotide binding,ATP binding,ATPase activity
LOC110673996	865.106	0.881114	0.223958	3.93428	8.34455e-05	0.00218414	AAEL022067
LOC110680767	105.378	-0.910187	0.231635	-3.9294	8.5158e-05	0.00222465	AAEL022805
LOC5572552	1167.94	0.791819	0.201686	3.926	8.63712e-05	0.00225199	AAEL009883	26S protease (S4) regulatory subunit, putative [Source:UniProtKB/TrEMBL;Acc:Q16UJ3]			GO:0000166,GO:0005524,GO:0005739,GO:0007005,GO:0016887	nucleotide binding,ATP binding,mitochondrion,mitochondrion organization,ATPase activity
LOC5573970	167.779	0.657932	0.167706	3.92313	8.74072e-05	0.00227107	AAEL010829	protein arginine n-methyltransferase [Source:VB Community Annotation]			GO:0008168,GO:0016274,GO:0016740,GO:0018216,GO:0032259,GO:0035246	methyltransferase activity,protein-arginine N-methyltransferase activity,transferase activity,peptidyl-arginine methylation,methylation,peptidyl-arginine N-methylation
LOC5563588	392.736	0.667891	0.170248	3.92304	8.74395e-05	0.00227107	AAEL000001
LOC5579023	925.82	0.502203	0.12813	3.91949	8.87375e-05	0.00230036	AAEL013968				GO:0000049,GO:0001510,GO:0003723,GO:0005634,GO:0008033,GO:0008168,GO:0016428,GO:0016740,GO:0030488,GO:0032259	tRNA binding,RNA methylation,RNA binding,nucleus,tRNA processing,methyltransferase activity,tRNA (cytosine-5-)-methyltransferase activity,transferase activity,tRNA methylation,methylation
LOC5567515	1629.55	-1.14331	0.291842	-3.91758	8.94426e-05	0.0023142	AAEL006139	Sodium/solute symporter [Source:UniProtKB/TrEMBL;Acc:A0A1S4FCK0]			GO:0016020,GO:0016021,GO:0022857,GO:0055085	membrane,integral component of membrane,transmembrane transporter activity,transmembrane transport
LOC5563966	5469.14	-0.445563	0.113808	-3.91504	9.03877e-05	0.00233418	AAEL004025	glucose dehydrogenase [Source:VB Community Annotation]			GO:0016614,GO:0050660,GO:0055114	oxidoreductase activity, acting on CH-OH group of donors,flavin adenine dinucleotide binding,oxidation-reduction process
LOC5570972	13144.3	-1.12083	0.286481	-3.9124	9.13828e-05	0.00235537	AAEL008699	prolylcarboxypeptidase, putative [Source:VB Community Annotation]			GO:0006508,GO:0008236,GO:0016787	proteolysis,serine-type peptidase activity,hydrolase activity
LOC5572923	5148.38	-0.466124	0.119169	-3.91144	9.17468e-05	0.00236025	AAEL010146	3-hydroxyacyl-coa dehyrogenase [Source:VB Community Annotation]			GO:0003824,GO:0003857,GO:0004300,GO:0005739,GO:0006629,GO:0006631,GO:0006635,GO:0016491,GO:0016507,GO:0055114	catalytic activity,3-hydroxyacyl-CoA dehydrogenase activity,enoyl-CoA hydratase activity,mitochondrion,lipid metabolic process,fatty acid metabolic process,fatty acid beta-oxidation,oxidoreductase activity,mitochondrial fatty acid beta-oxidation multienzyme complex,oxidation-reduction process
LOC110678903	45.8254	-1.3169	0.33742	-3.90285	9.50662e-05	0.002441	AAEL024778
LOC5576615	17.7378	2.11645	0.542542	3.90098	9.58024e-05	0.00245523	AAEL012650				GO:0005576,GO:0006030,GO:0008061	extracellular region,chitin metabolic process,chitin binding
LOC5574096	446.004	0.690992	0.177164	3.9003	9.60742e-05	0.00245753	AAEL002269	purine nucleoside phosphorylase [Source:VB Community Annotation]			GO:0003824,GO:0004731,GO:0005634,GO:0006139,GO:0009116,GO:0016740,GO:0016757	catalytic activity,purine-nucleoside phosphorylase activity,nucleus,nucleobase-containing compound metabolic process,nucleoside metabolic process,transferase activity,transferase activity, transferring glycosyl groups
LOC5576108	692.044	0.721565	0.185172	3.89672	9.75036e-05	0.00248938	AAEL002800	DNA polymerase epsilon, catalytic subunit [Source:VB Community Annotation]			GO:0000166,GO:0003676,GO:0003677,GO:0003887,GO:0005634,GO:0006260,GO:0006281,GO:0008270,GO:0008622,GO:0016740,GO:0016779,GO:0046872,GO:0051536,GO:0051539,GO:0071897	nucleotide binding,nucleic acid binding,DNA binding,DNA-directed DNA polymerase activity,nucleus,DNA replication,DNA repair,zinc ion binding,epsilon DNA polymerase complex,transferase activity,nucleotidyltransferase activity,metal ion binding,iron-sulfur cluster binding,4 iron, 4 sulfur cluster binding,DNA biosynthetic process
LOC5570987	10813	-1.53681	0.394597	-3.89464	9.83463e-05	0.0025031	AAEL008717
LOC110677112	195.924	-0.654222	0.167987	-3.89448	9.84116e-05	0.0025031	AAEL023478				GO:0005525	GTP binding
LOC5575138	87.6177	-4.59979	1.18275	-3.88908	0.000100627	0.00255199	AAEL000327	Ecdysone-induced protein 78C Nuclear receptor [Source:VB Community Annotation]	E78		GO:0003677,GO:0003700,GO:0003707,GO:0004879,GO:0005634,GO:0006355,GO:0008270,GO:0030522,GO:0042025,GO:0043565,GO:0046872	DNA binding,DNA-binding transcription factor activity,steroid hormone receptor activity,nuclear receptor activity,nucleus,regulation of transcription, DNA-templated,zinc ion binding,intracellular receptor signaling pathway,host cell nucleus,sequence-specific DNA binding,metal ion binding
LOC110680413	211.455	-1.81586	0.466938	-3.88887	0.000100711	0.00255199	AAEL023099
LOC110678413	385.287	-3.78656	0.973906	-3.88801	0.000101069	0.00255624	AAEL027506
LOC5571113	461.267	-0.619733	0.159437	-3.887	0.000101491	0.00256212	AAEL001509				GO:0005085,GO:0005089,GO:0035023	guanyl-nucleotide exchange factor activity,Rho guanyl-nucleotide exchange factor activity,regulation of Rho protein signal transduction
LOC5575750	289.364	0.709933	0.182695	3.88589	0.000101954	0.00256902	AAEL002719				GO:0003723,GO:0006400	RNA binding,tRNA modification
LOC5573058	161.941	-0.708415	0.182355	-3.8848	0.000102413	0.0025729	AAEL010247
LOC110677006	37.6448	1.4215	0.365929	3.88462	0.000102489	0.0025729	AAEL020192
LOC5576497	65.4153	1.27468	0.328227	3.88354	0.000102946	0.00257957	AAEL022598				GO:0016788	hydrolase activity, acting on ester bonds
LOC5571073	509.53	0.813814	0.209638	3.882	0.000103601	0.00259117	AAEL026276				GO:0016020,GO:0016021,GO:0022857,GO:0055085	membrane,integral component of membrane,transmembrane transporter activity,transmembrane transport
LOC5576034	259.698	0.676587	0.174348	3.88068	0.000104167	0.00260051	AAEL012265	transcription initiation factor RRN3 [Source:VB Community Annotation]
LOC5567067	899.473	-0.652441	0.168317	-3.87628	0.000106067	0.00264307	AAEL005822				GO:0016491,GO:0046872,GO:0055114	oxidoreductase activity,metal ion binding,oxidation-reduction process
LOC5569339	1119.28	-0.623756	0.160991	-3.87449	0.000106848	0.00265763	AAEL007536	carnitine o-acyltransferase [Source:VB Community Annotation]			GO:0016740,GO:0016746	transferase activity,transferase activity, transferring acyl groups
LOC5579442	186.006	-0.652818	0.168646	-3.87094	0.000108417	0.0026917	AAEL011071	U2 snrnp auxiliary factor, small subunit [Source:UniProtKB/TrEMBL;Acc:A0A1S4FS45]			GO:0000398,GO:0003676,GO:0003723,GO:0046872,GO:0089701	mRNA splicing, via spliceosome,nucleic acid binding,RNA binding,metal ion binding,U2AF complex
LOC5574953	1942.75	-0.448877	0.116013	-3.8692	0.000109194	0.00270602	AAEL011551				GO:0016020,GO:0016021	membrane,integral component of membrane
LOC5573697	316.447	-0.763592	0.197419	-3.86786	0.000109793	0.00271587	AAEL010685
LOC5573209	302.364	-0.664895	0.171977	-3.86619	0.000110551	0.00272961	AAEL022977
LOC5571573	251.556	0.615905	0.159369	3.86464	0.000111253	0.00274194	AAEL009156	tRNA (guanine-N(7)-)-methyltransferase (EC 2.1.1.33)(tRNA(m7G46)-methyltransferase) [Source:VB Community Annotation]			GO:0000049,GO:0003723,GO:0005634,GO:0006400,GO:0008033,GO:0008168,GO:0008176,GO:0016740,GO:0030488,GO:0032259,GO:0106004	tRNA binding,RNA binding,nucleus,tRNA modification,tRNA processing,methyltransferase activity,tRNA (guanine-N7-)-methyltransferase activity,transferase activity,tRNA methylation,methylation,tRNA (guanine-N7)-methylation
LOC5568150	1748.64	0.431	0.111604	3.86185	0.000112531	0.00276839	AAEL006577	aspartyl-tRNA synthetase [Source:VB Community Annotation]			GO:0000166,GO:0003676,GO:0004812,GO:0004816,GO:0005524,GO:0006412,GO:0006418,GO:0006421	nucleotide binding,nucleic acid binding,aminoacyl-tRNA ligase activity,asparagine-tRNA ligase activity,ATP binding,translation,tRNA aminoacylation for protein translation,asparaginyl-tRNA aminoacylation
LOC5569107	152.232	1.38747	0.359332	3.86126	0.000112805	0.00277008	AAEL007371
LOC5576530	1244.76	0.416322	0.107876	3.85926	0.000113733	0.00278779	AAEL024479
LOC5570797	272.12	-0.631443	0.16365	-3.8585	0.000114083	0.00279009	AAEL008588	Innexin [Source:UniProtKB/TrEMBL;Acc:Q16YE3]	inx7		GO:0005886,GO:0005921,GO:0006811,GO:0016020,GO:0016021,GO:0030054	plasma membrane,gap junction,ion transport,membrane,integral component of membrane,cell junction
LOC5578897	369.349	-1.29229	0.334949	-3.85817	0.000114239	0.00279009	AAEL026458				GO:0006508,GO:0008233,GO:0008237,GO:0008270,GO:0016787,GO:0046872	proteolysis,peptidase activity,metallopeptidase activity,zinc ion binding,hydrolase activity,metal ion binding
LOC5570448	704.464	-0.788776	0.204594	-3.85532	0.000115578	0.00281768	AAEL008347	monocarboxylate transporter [Source:VB Community Annotation]			GO:0016020,GO:0016021,GO:0022857,GO:0055085	membrane,integral component of membrane,transmembrane transporter activity,transmembrane transport
LOC5568392	57.7175	1.03904	0.269739	3.85204	0.000117138	0.00285056	AAEL006772				GO:0000070,GO:0005634,GO:0007049,GO:0007062,GO:0016407,GO:0016740,GO:0016746,GO:0045132,GO:0046872	mitotic sister chromatid segregation,nucleus,cell cycle,sister chromatid cohesion,acetyltransferase activity,transferase activity,transferase activity, transferring acyl groups,meiotic chromosome segregation,metal ion binding
LOC110680884	1845.45	-0.888293	0.230634	-3.85153	0.00011738	0.00285133	AAEL025617
LOC5571600	29.2487	2.05876	0.535117	3.8473	0.000119428	0.00289585	AAEL009181	Uncharacterized protein AEGI23 [Source:UniProtKB/TrEMBL;Acc:Q8STC4]
LOC110674474	4.31977	-5.55746	1.44516	-3.84558	0.00012027	0.00291104	AAEL026617
LOC5569652	824.513	0.877787	0.228306	3.84477	0.000120664	0.00291535	AAEL022067
LOC110676868	9.6001	2.86392	0.745366	3.84231	0.000121884	0.00293958	AAEL027477
LOC5564603	887.736	0.629734	0.163917	3.84179	0.000122139	0.00294049	AAEL010086	DNA replication licensing factor MCM4 [Source:VB Community Annotation]			GO:0000166,GO:0003677,GO:0003678,GO:0004386,GO:0005524,GO:0005634,GO:0006260,GO:0006270,GO:0016787,GO:0032508,GO:0042555	nucleotide binding,DNA binding,DNA helicase activity,helicase activity,ATP binding,nucleus,DNA replication,DNA replication initiation,hydrolase activity,DNA duplex unwinding,MCM complex
LOC110675410	6.87454	-5.23392	1.36275	-3.84069	0.000122689	0.00294847	AAEL025083
LOC110678003	338.416	0.556754	0.145347	3.83051	0.000127878	0.0030658	AAEL027026				GO:0000027,GO:0005634,GO:0005654,GO:0005730,GO:0042254	ribosomal large subunit assembly,nucleus,nucleoplasm,nucleolus,ribosome biogenesis
LOC110680885	677.257	-0.877091	0.228992	-3.83023	0.000128026	0.0030658	AAEL022733				GO:0006508,GO:0008237,GO:0008270	proteolysis,metallopeptidase activity,zinc ion binding
LOC5578958	349.133	0.672727	0.175757	3.82759	0.000129402	0.00309328	AAEL013940	chromatin assembly factor i P60 subunit [Source:VB Community Annotation]			GO:0005515	protein binding
LOC5568605	162.276	0.707817	0.185036	3.82529	0.00013062	0.00311688	AAEL006972	hepatocellular carcinoma-associated antigen [Source:VB Community Annotation]			GO:0000462,GO:0005515,GO:0006396,GO:0030515	maturation of SSU-rRNA from tricistronic rRNA transcript (SSU-rRNA, 5.8S rRNA, LSU-rRNA),protein binding,RNA processing,snoRNA binding
LOC5567927	496	0.871813	0.227952	3.82455	0.00013101	0.00312068	AAEL006372	sulphate transporter [Source:VB Community Annotation]			GO:0008271,GO:0008272,GO:0015116,GO:0016020,GO:0016021,GO:0055085,GO:1902358	secondary active sulfate transmembrane transporter activity,sulfate transport,sulfate transmembrane transporter activity,membrane,integral component of membrane,transmembrane transport,sulfate transmembrane transport
LOC5572489	27.9474	-3.12595	0.81814	-3.8208	0.000133021	0.00316121	AAEL015412	metalloproteinase, putative [Source:VB Community Annotation]			GO:0004222,GO:0006508,GO:0008233,GO:0008237,GO:0008270,GO:0016787,GO:0046872	metalloendopeptidase activity,proteolysis,peptidase activity,metallopeptidase activity,zinc ion binding,hydrolase activity,metal ion binding
LOC5577670	225.475	0.592127	0.155006	3.82002	0.00013344	0.00316121	AAEL025089
LOC110674848	41.066	-1.74562	0.457008	-3.81967	0.000133628	0.00316121	AAEL024777				GO:0005515	protein binding
LOC5567152	226.076	-1.0546	0.276101	-3.81964	0.000133648	0.00316121	AAEL005903	UDP-glucuronosyltransferase, putative [Source:VB Community Annotation]			GO:0008194,GO:0016020,GO:0016021,GO:0016740,GO:0016757,GO:0016758	UDP-glycosyltransferase activity,membrane,integral component of membrane,transferase activity,transferase activity, transferring glycosyl groups,transferase activity, transferring hexosyl groups
LOC5575145	236.355	-0.750765	0.196605	-3.81865	0.000134184	0.00316835	AAEL012978				GO:0016020,GO:0016021	membrane,integral component of membrane
LOC5575688	172.889	-0.651769	0.170714	-3.8179	0.000134595	0.00317249	AAEL012007				GO:0016020,GO:0016021	membrane,integral component of membrane
LOC23687443	220.608	1.07136	0.280802	3.81536	0.000135986	0.00319969	AAEL017023				GO:0004866,GO:0005576,GO:0005615,GO:0010951	endopeptidase inhibitor activity,extracellular region,extracellular space,negative regulation of endopeptidase activity
LOC5566493	3672.42	-0.380192	0.0996665	-3.81464	0.00013638	0.0032034	AAEL005432				GO:0007160,GO:0016020,GO:0016021	cell-matrix adhesion,membrane,integral component of membrane
LOC110676221	138.152	-0.719112	0.18864	-3.81209	0.000137799	0.00323111	AAEL026834
LOC110675401	11.3944	-5.97376	1.56805	-3.80967	0.000139153	0.00325719	AAEL027233
LOC110680967	254.547	-0.722016	0.189645	-3.8072	0.000140551	0.00328422	AAEL023576				GO:0007343,GO:0033011,GO:0035038,GO:0035039,GO:0050699	egg activation,perinuclear theca,female pronucleus assembly,male pronucleus assembly,WW domain binding
LOC5578794	1471.05	0.989631	0.26004	3.80569	0.000141407	0.00329368	AAEL003664	lupus la ribonucleoprotein [Source:VB Community Annotation]			GO:0003676,GO:0003723,GO:0005634,GO:0006396,GO:1990904	nucleic acid binding,RNA binding,nucleus,RNA processing,ribonucleoprotein complex
LOC5566251	3465.84	-0.566342	0.14883	-3.80529	0.000141638	0.00329368	AAEL015110	dipeptidyl-peptidase [Source:VB Community Annotation]			GO:0006508,GO:0008236	proteolysis,serine-type peptidase activity
LOC5567534	604.316	-3.41787	0.898209	-3.8052	0.000141687	0.00329368	AAEL006122
LOC5574346	172.469	0.820657	0.215723	3.80422	0.000142252	0.00330113	AAEL002322				GO:0005634,GO:0005730,GO:0030490	nucleus,nucleolus,maturation of SSU-rRNA
LOC110676841	315.411	0.775693	0.203982	3.80275	0.000143098	0.00331506	AAEL014539	maltose phosphorylase [Source:VB Community Annotation]			GO:0003824,GO:0005975	catalytic activity,carbohydrate metabolic process
LOC5564769	1015.34	0.552175	0.145304	3.80013	0.000144618	0.00334453	AAEL004438	GrpE protein homolog [Source:UniProtKB/TrEMBL;Acc:Q17CT4]			GO:0000774,GO:0005739,GO:0005759,GO:0006457,GO:0042803,GO:0050790,GO:0051087	adenyl-nucleotide exchange factor activity,mitochondrion,mitochondrial matrix,protein folding,protein homodimerization activity,regulation of catalytic activity,chaperone binding
LOC5565550	150.283	-0.844762	0.222379	-3.79875	0.000145425	0.00335746	AAEL004854				GO:0005634,GO:0005737	nucleus,cytoplasm
LOC5568186	21.4598	-3.93421	1.0359	-3.79786	0.000145953	0.00336094	AAEL006623				GO:0005576,GO:0008061	extracellular region,chitin binding
LOC5565579	115.299	-1.67721	0.441652	-3.79758	0.000146118	0.00336094	AAEL014890	cytochrome P450 [Source:VB Community Annotation]	CYP6CC1		GO:0004497,GO:0005506,GO:0005789,GO:0016020,GO:0016021,GO:0016491,GO:0016705,GO:0020037,GO:0031090,GO:0046872,GO:0055114	monooxygenase activity,iron ion binding,endoplasmic reticulum membrane,membrane,integral component of membrane,oxidoreductase activity,oxidoreductase activity, acting on paired donors, with incorporation or reduction of molecular oxygen,heme binding,organelle membrane,metal ion binding,oxidation-reduction process
LOC5568622	642.73	1.19647	0.315091	3.79723	0.000146323	0.00336094	AAEL006968				GO:0030246	carbohydrate binding
LOC5577964	1053.17	0.842015	0.22192	3.79423	0.000148105	0.0033961	AAEL013436
LOC5565841	1217.08	-1.01372	0.267218	-3.79359	0.000148486	0.00339727	AAEL005043	ATP-dependent bile acid permease [Source:VB Community Annotation]			GO:0000166,GO:0005524,GO:0016020,GO:0016021,GO:0016887,GO:0022857,GO:0042626,GO:0055085	nucleotide binding,ATP binding,membrane,integral component of membrane,ATPase activity,transmembrane transporter activity,ATPase-coupled transmembrane transporter activity,transmembrane transport
LOC5574567	92.0237	0.823034	0.216981	3.79311	0.000148769	0.00339727	AAEL020432				GO:0008612	peptidyl-lysine modification to peptidyl-hypusine
LOC5564655	286.873	0.618298	0.163015	3.79288	0.00014891	0.00339727	AAEL004364				GO:0005515	protein binding
LOC23687564	446.863	1.13658	0.299851	3.79047	0.000150364	0.00342465	AAEL017144
LOC110677977	8.06897	4.5648	1.20485	3.7887	0.000151439	0.0034431	AAEL025759
LOC5570161	104.731	0.785744	0.207414	3.7883	0.000151684	0.0034431	AAEL008124	possible RNA methyltransferase, putative [Source:VB Community Annotation]			GO:0005634,GO:0008033,GO:0008168,GO:0016429,GO:0016740,GO:0030488,GO:0031515,GO:0032259	nucleus,tRNA processing,methyltransferase activity,tRNA (adenine-N1-)-methyltransferase activity,transferase activity,tRNA methylation,tRNA (m1A) methyltransferase complex,methylation
LOC5563826	260.318	0.629504	0.16622	3.78718	0.000152369	0.00345284	AAEL023529				GO:0005515	protein binding
LOC5569397	289.404	-1.12045	0.296134	-3.7836	0.000154574	0.00349694	AAEL007603	odorant binding protein (OBP10) [Source:VB Community Annotation]	OBP10		GO:0005549	odorant binding
LOC5579417	5212.87	1.13156	0.299149	3.78259	0.000155205	0.00350535	AAEL015458	transferrin [Source:VB Community Annotation]	Tf1		GO:0005576,GO:0005615,GO:0006811,GO:0046872,GO:0055072	extracellular region,extracellular space,ion transport,metal ion binding,iron ion homeostasis
LOC5565683	825.887	0.418582	0.110698	3.78131	0.000156008	0.0035176	AAEL004920				GO:0005515	protein binding
LOC5577039	194.06	0.619508	0.163966	3.77827	0.000157919	0.00355477	AAEL012955	phosphatidylethanolamine-binding protein [Source:VB Community Annotation]
LOC5579244	296.537	0.621227	0.164472	3.7771	0.000158666	0.00356562	AAEL023330
LOC5575416	962.877	0.527113	0.139633	3.77498	0.00016002	0.00359008	AAEL011813	Uncharacterized protein (Fragment) [Source:UniProtKB/TrEMBL;Acc:Q1HQY8]			GO:0005515,GO:0005634,GO:0005737,GO:0072546	protein binding,nucleus,cytoplasm,ER membrane protein complex
LOC5567826	380.528	0.519126	0.137607	3.77251	0.000161611	0.00361976	AAEL000978				GO:0005634,GO:0005730,GO:0006364	nucleus,nucleolus,rRNA processing
LOC5574483	565.313	-0.469788	0.124569	-3.7713	0.0001624	0.00363141	AAEL002370				GO:0004438,GO:0004725,GO:0005737,GO:0016311,GO:0016791,GO:0035335	phosphatidylinositol-3-phosphatase activity,protein tyrosine phosphatase activity,cytoplasm,dephosphorylation,phosphatase activity,peptidyl-tyrosine dephosphorylation
LOC110674131	17.9568	-2.44198	0.647659	-3.77048	0.000162937	0.0036374	AAEL021310				GO:0005515	protein binding
LOC5571611	384.264	0.57337	0.15227	3.76549	0.000166225	0.00370467	AAEL009195				GO:0016020,GO:0016021,GO:0022857,GO:0055085	membrane,integral component of membrane,transmembrane transporter activity,transmembrane transport
LOC5568987	298.96	0.61924	0.16466	3.76071	0.00016943	0.00376989	AAEL007289	NBP2b protein, putative [Source:VB Community Annotation]			GO:0005634	nucleus
LOC5563946	396.767	0.620655	0.165067	3.76002	0.0001699	0.00377413	AAEL014250	insect replication protein a [Source:VB Community Annotation]			GO:0003677,GO:0005634,GO:0006260,GO:0006281,GO:0006310	DNA binding,nucleus,DNA replication,DNA repair,DNA recombination
LOC5576721	296.705	0.619166	0.164723	3.75882	0.000170714	0.0037854	AAEL023334
LOC5567341	717.918	-1.01243	0.269375	-3.75845	0.000170968	0.0037854	AAEL006011				GO:0005515,GO:0016020,GO:0016021	protein binding,membrane,integral component of membrane
LOC110680949	12.7975	-2.2992	0.612249	-3.75534	0.000173108	0.00382453	AAEL025855				GO:0006511,GO:0016579,GO:0036459	ubiquitin-dependent protein catabolic process,protein deubiquitination,thiol-dependent ubiquitinyl hydrolase activity
LOC5569476	97.3806	0.871259	0.232023	3.75506	0.000173302	0.00382453	AAEL007655				GO:0003676,GO:0005634,GO:0005730	nucleic acid binding,nucleus,nucleolus
LOC5571317	347.981	0.861649	0.229608	3.75269	0.000174944	0.00385448	AAEL008942				GO:0005634,GO:0005730,GO:0042254	nucleus,nucleolus,ribosome biogenesis
LOC5575032	6403.89	0.663605	0.176877	3.75179	0.00017558	0.00386218	AAEL011584	chaperonin-60kD, ch60 [Source:VB Community Annotation]			GO:0000166,GO:0005524,GO:0005737,GO:0006457,GO:0042026	nucleotide binding,ATP binding,cytoplasm,protein folding,protein refolding
LOC5574223	3073.36	-0.82472	0.219923	-3.75005	0.000176802	0.00388274	AAEL012382				GO:0000166,GO:0009166,GO:0016787,GO:0016788,GO:0046872	nucleotide binding,nucleotide catabolic process,hydrolase activity,hydrolase activity, acting on ester bonds,metal ion binding
LOC5564872	331.141	0.815419	0.217496	3.74912	0.000177455	0.00389075	AAEL004455				GO:0000027,GO:0000470,GO:0005634,GO:0005730,GO:0019843	ribosomal large subunit assembly,maturation of LSU-rRNA,nucleus,nucleolus,rRNA binding
LOC5576784	1785.19	0.976582	0.260656	3.74664	0.000179221	0.00392311	AAEL012764				GO:0008168,GO:0016740,GO:0017174,GO:0032259	methyltransferase activity,transferase activity,glycine N-methyltransferase activity,methylation
LOC5575359	173.056	1.01635	0.271356	3.74545	0.000180071	0.00393534	AAEL011764	prophenoloxidase [Source:VB Community Annotation]	PPO10		GO:0004497,GO:0016491,GO:0046872,GO:0055114	monooxygenase activity,oxidoreductase activity,metal ion binding,oxidation-reduction process
LOC5577668	311.075	-1.26379	0.337645	-3.74295	0.000181871	0.00396825	AAEL020609				GO:0004177,GO:0006508,GO:0008237,GO:0008270	aminopeptidase activity,proteolysis,metallopeptidase activity,zinc ion binding
LOC23687895	357.827	-1.66088	0.444013	-3.7406	0.000183579	0.00399906	AAEL017475				GO:0004252,GO:0006508	serine-type endopeptidase activity,proteolysis
LOC5572798	2003.45	-0.432508	0.115647	-3.7399	0.000184095	0.00400384	AAEL001913				GO:0005886,GO:0016020,GO:0016021	plasma membrane,membrane,integral component of membrane
LOC5567783	104.33	0.786342	0.2105	3.73559	0.000187272	0.00406639	AAEL000115				GO:0003676,GO:0003723	nucleic acid binding,RNA binding
LOC5568669	820.031	0.622438	0.166667	3.73462	0.000187997	0.00407559	AAEL007007	DNA replication licensing factor MCM2 [Source:VB Community Annotation]			GO:0000166,GO:0003677,GO:0003678,GO:0004386,GO:0005524,GO:0005634,GO:0006260,GO:0006270,GO:0016787,GO:0032508,GO:0042555,GO:1905775	nucleotide binding,DNA binding,DNA helicase activity,helicase activity,ATP binding,nucleus,DNA replication,DNA replication initiation,hydrolase activity,DNA duplex unwinding,MCM complex,negative regulation of DNA helicase activity
LOC5569472	346.782	0.660742	0.177269	3.72734	0.000193511	0.00418247	AAEL007656	receptor for activated C kinase, putative [Source:VB Community Annotation]			GO:0005515	protein binding
LOC5572949	284.364	-0.849842	0.228024	-3.72699	0.000193782	0.00418247	AAEL010171	peptidoglycan recognition protein (Long) [Source:VB Community Annotation]	PGRPLB		GO:0002376,GO:0008270,GO:0008745,GO:0009253,GO:0042834,GO:0045087	immune system process,zinc ion binding,N-acetylmuramoyl-L-alanine amidase activity,peptidoglycan catabolic process,peptidoglycan binding,innate immune response
LOC5577678	502.636	0.635423	0.170497	3.72689	0.000193857	0.00418247	AAEL013314	calicylin binding protein [Source:VB Community Annotation]			GO:0005634,GO:0005737,GO:0015631,GO:0031625,GO:0044548	nucleus,cytoplasm,tubulin binding,ubiquitin protein ligase binding,S100 protein binding
LOC5577078	758.805	-0.714894	0.191877	-3.72579	0.000194703	0.00419404	AAEL012975				GO:0016020,GO:0016021	membrane,integral component of membrane
LOC5576345	1542.86	-0.396849	0.106601	-3.72273	0.00019708	0.00423847	AAEL002866	cyclin l [Source:VB Community Annotation]			GO:0000079,GO:0005634,GO:0005654,GO:0006355,GO:0006357,GO:0006396,GO:0016538,GO:0016607,GO:0042025	regulation of cyclin-dependent protein serine/threonine kinase activity,nucleus,nucleoplasm,regulation of transcription, DNA-templated,regulation of transcription by RNA polymerase II,RNA processing,cyclin-dependent protein serine/threonine kinase regulator activity,nuclear speck,host cell nucleus
LOC5577598	12406.6	0.976663	0.262488	3.7208	0.000198596	0.00426428	AAEL003232				GO:0042302	structural constituent of cuticle
LOC5569500	327.214	-0.727907	0.196045	-3.71295	0.000204854	0.00439168	AAEL007694				GO:0005515,GO:0016567,GO:0019005,GO:0080008	protein binding,protein ubiquitination,SCF ubiquitin ligase complex,Cul4-RING E3 ubiquitin ligase complex
LOC110681240	48.7963	1.45705	0.392499	3.71223	0.000205439	0.00439427	AAEL025230				GO:0005634	nucleus
LOC5576095	369.653	-0.596525	0.160702	-3.712	0.000205626	0.00439427	AAEL002815				GO:0005794	Golgi apparatus
LOC110675466	3504.7	1.11874	0.301442	3.7113	0.000206198	0.00439955	AAEL025945				GO:0042302	structural constituent of cuticle
LOC5575668	5152.27	-0.665246	0.179359	-3.70901	0.000208073	0.00443255	AAEL002687	sterol carrier protein-2, putative [Source:VB Community Annotation]			GO:0003824,GO:0005737,GO:0005739,GO:0005777,GO:0006869,GO:0008289,GO:0016740,GO:0016746,GO:0016747,GO:0033814,GO:0050632	catalytic activity,cytoplasm,mitochondrion,peroxisome,lipid transport,lipid binding,transferase activity,transferase activity, transferring acyl groups,transferase activity, transferring acyl groups other than amino-acyl groups,propanoyl-CoA C-acyltransferase activity,propionyl-CoA C2-trimethyltridecanoyltransferase activity
LOC110674850	26.9101	-1.66889	0.450159	-3.70735	0.000209443	0.00445073	AAEL023728				GO:0005515	protein binding
LOC5576729	464.356	-0.897457	0.242102	-3.70693	0.000209784	0.00445073	AAEL002950
LOC5577945	118.112	-0.948737	0.255971	-3.70642	0.000210208	0.00445073	AAEL019754				GO:0007165	signal transduction
LOC5568477	352.502	1.21596	0.328072	3.70638	0.000210245	0.00445073	AAEL006883				GO:0005634,GO:0051726	nucleus,regulation of cell cycle
LOC5576791	52.6596	-1.59355	0.430024	-3.70573	0.000210784	0.00445515	AAEL022651
LOC5576669	4243.79	-1.53928	0.415449	-3.70509	0.000211315	0.00445942	AAEL018247
LOC5564428	745.912	-1.62241	0.438121	-3.70311	0.000212971	0.0044859	AAEL014435	juvenile hormone-inducible protein, putative [Source:VB Community Annotation]
LOC5566740	323.326	-1.73617	0.46888	-3.7028	0.000213234	0.0044859	AAEL005616	trypsin [Source:VB Community Annotation]			GO:0004252,GO:0006508,GO:0008233,GO:0008236,GO:0016787	serine-type endopeptidase activity,proteolysis,peptidase activity,serine-type peptidase activity,hydrolase activity
LOC5568814	11265.2	0.801417	0.216465	3.7023	0.000213656	0.00448778	AAEL001194	fatty acid synthase [Source:VB Community Annotation]	FAS1		GO:0003824,GO:0004312,GO:0004313,GO:0004314,GO:0004315,GO:0004316,GO:0004317,GO:0004320,GO:0006631,GO:0006633,GO:0008152,GO:0008659,GO:0008693,GO:0009058,GO:0016295,GO:0016296,GO:0016297,GO:0016418,GO:0016419,GO:0016491,GO:0016740,GO:0016746,GO:0016788,GO:0016829,GO:0019171,GO:0031177,GO:0047117,GO:0047451,GO:0055114,GO:0102131,GO:0102132	catalytic activity,fatty acid synthase activity,[acyl-carrier-protein] S-acetyltransferase activity,[acyl-carrier-protein] S-malonyltransferase activity,3-oxoacyl-[acyl-carrier-protein] synthase activity,3-oxoacyl-[acyl-carrier-protein] reductase (NADPH) activity,3-hydroxypalmitoyl-[acyl-carrier-protein] dehydratase activity,oleoyl-[acyl-carrier-protein] hydrolase activity,fatty acid metabolic pr…
LOC5564427	321.046	-0.722434	0.195251	-3.70003	0.000215575	0.00452105	AAEL014439	juvenile hormone-inducible protein, putative [Source:VB Community Annotation]
LOC5573033	910.858	0.410781	0.111115	3.6969	0.000218247	0.00456842	AAEL010206	xylulose kinase [Source:VB Community Annotation]			GO:0000166,GO:0004856,GO:0005524,GO:0005975,GO:0005997,GO:0016301,GO:0016310,GO:0016740,GO:0016773,GO:0042732,GO:0046835	nucleotide binding,xylulokinase activity,ATP binding,carbohydrate metabolic process,xylulose metabolic process,kinase activity,phosphorylation,transferase activity,phosphotransferase activity, alcohol group as acceptor,D-xylose metabolic process,carbohydrate phosphorylation
LOC5564641	219.317	0.614527	0.166241	3.6966	0.00021851	0.00456842	AAEL004355				GO:0000398,GO:0005634,GO:0005681,GO:0006397,GO:0008380,GO:0071011	mRNA splicing, via spliceosome,nucleus,spliceosomal complex,mRNA processing,RNA splicing,precatalytic spliceosome
LOC5565540	415.253	0.661129	0.179007	3.6933	0.00022136	0.00461863	AAEL004860	acireductone dioxygenase [Source:VB Community Annotation]			GO:0005506,GO:0005634,GO:0005737,GO:0008652,GO:0009086,GO:0010309,GO:0016491,GO:0019509,GO:0046872,GO:0051213,GO:0055114	iron ion binding,nucleus,cytoplasm,cellular amino acid biosynthetic process,methionine biosynthetic process,acireductone dioxygenase [iron(II)-requiring] activity,oxidoreductase activity,L-methionine salvage from methylthioadenosine,metal ion binding,dioxygenase activity,oxidation-reduction process
LOC5575927	81.4798	-2.97124	0.804554	-3.69303	0.000221596	0.00461863	AAEL012164	spaetzle-like cytokine [Source:VB Community Annotation]	SPZ6
LOC5572218	1233.82	-1.0181	0.275733	-3.69233	0.00022221	0.0046243	AAEL009625	short-chain dehydrogenase [Source:VB Community Annotation]			GO:0055114	oxidation-reduction process
LOC5568730	251.871	-0.745498	0.202109	-3.6886	0.000225491	0.00468537	AAEL007088	ribitol kinase [Source:VB Community Annotation]			GO:0005975,GO:0016773	carbohydrate metabolic process,phosphotransferase activity, alcohol group as acceptor
LOC5566281	1716.86	-0.589337	0.159858	-3.68663	0.000227244	0.00471453	AAEL000735	acyl-CoA oxidase [Source:VB Community Annotation]			GO:0003997,GO:0005777,GO:0006629,GO:0006631,GO:0006635,GO:0016491,GO:0016627,GO:0050660,GO:0055114,GO:0071949	acyl-CoA oxidase activity,peroxisome,lipid metabolic process,fatty acid metabolic process,fatty acid beta-oxidation,oxidoreductase activity,oxidoreductase activity, acting on the CH-CH group of donors,flavin adenine dinucleotide binding,oxidation-reduction process,FAD binding
LOC110676293	108.149	1.21472	0.329663	3.68472	0.000228956	0.00474275	AAEL003723	C-Type Lysozyme (Lys-A). [Source:VB Community Annotation]	LYSC11		GO:0003796	lysozyme activity
LOC5566785	171.97	1.08243	0.293856	3.68353	0.000230028	0.00475766	AAEL005641	C-Type Lectin (CTL) - galactose binding. [Source:VB Community Annotation]	CTLGA5
LOC5569501	1142.64	-0.443484	0.120496	-3.6805	0.00023278	0.00480722	AAEL007691	organic anion transporter [Source:VB Community Annotation]			GO:0005215,GO:0005515,GO:0005886,GO:0006811,GO:0016020,GO:0016021,GO:0055085	transporter activity,protein binding,plasma membrane,ion transport,membrane,integral component of membrane,transmembrane transport
LOC5572929	5876.89	-0.393271	0.106931	-3.67779	0.000235262	0.0048438	AAEL010148	sodium/potassium-dependent ATPase beta-2 subunit [Source:VB Community Annotation]			GO:0005886,GO:0005890,GO:0006813,GO:0006814,GO:0016020,GO:0016021	plasma membrane,sodium:potassium-exchanging ATPase complex,potassium ion transport,sodium ion transport,membrane,integral component of membrane
LOC5575535	3186.87	-0.638448	0.173596	-3.67779	0.000235268	0.0048438	AAEL011905	myosin i [Source:VB Community Annotation]			GO:0000166,GO:0003774,GO:0003779,GO:0005524,GO:0016459	nucleotide binding,motor activity,actin binding,ATP binding,myosin complex
LOC5570510	98.4348	0.774952	0.210801	3.67622	0.000236714	0.00486614	AAEL001400	DNA-directed RNA polymerases III 12.5 kDa polypeptide, putative [Source:VB Community Annotation]			GO:0003676,GO:0003899,GO:0005634,GO:0005730,GO:0006351,GO:0008270,GO:0042779,GO:0046872	nucleic acid binding,DNA-directed 5'-3' RNA polymerase activity,nucleus,nucleolus,transcription, DNA-templated,zinc ion binding,tRNA 3'-trailer cleavage,metal ion binding
LOC5565801	514.45	-1.12838	0.307068	-3.67471	0.000238122	0.00488765	AAEL005001	aquaporin [Source:VB Community Annotation]			GO:0015267,GO:0016020,GO:0016021,GO:0055085	channel activity,membrane,integral component of membrane,transmembrane transport
LOC5573874	5365.08	-0.469149	0.127762	-3.67205	0.000240612	0.00493126	AAEL010789				GO:0005509	calcium ion binding
LOC5577696	275.021	0.818125	0.222839	3.67138	0.000241243	0.00493672	AAEL023423				GO:0000166,GO:0004672,GO:0004674,GO:0005524,GO:0006468	nucleotide binding,protein kinase activity,protein serine/threonine kinase activity,ATP binding,protein phosphorylation
LOC110676393	75.4508	-1.77592	0.484141	-3.66819	0.000244278	0.00499126	AAEL026402				GO:0005576,GO:0008061	extracellular region,chitin binding
LOC110678856	139.853	-1.36129	0.371381	-3.66548	0.000246872	0.00503664	AAEL027968
LOC5563841	3115.06	-1.33136	0.363357	-3.66406	0.000248246	0.00505702	AAEL014171
LOC5568315	399.56	-1.30107	0.35515	-3.66344	0.000248848	0.00506165	AAEL006754				GO:0005515	protein binding
LOC5577626	910.534	-0.417092	0.113873	-3.66279	0.00024948	0.00506687	AAEL003210	tetraspanin 29fa [Source:VB Community Annotation]			GO:0016020,GO:0016021	membrane,integral component of membrane
LOC110674776	62.513	-1.56267	0.426727	-3.66198	0.000250271	0.00507532	AAEL026955
LOC5576116	260.834	0.764769	0.208905	3.66085	0.000251377	0.0050901	AAEL002808	diphthine synthase [Source:VB Community Annotation]			GO:0004164,GO:0008168,GO:0016740,GO:0017183,GO:0032259	diphthine synthase activity,methyltransferase activity,transferase activity,peptidyl-diphthamide biosynthetic process from peptidyl-histidine,methylation
LOC5571144	2270.21	-0.870344	0.237962	-3.65749	0.000254699	0.00514966	AAEL008841	acyl-CoA oxidase [Source:VB Community Annotation]			GO:0003997,GO:0005777,GO:0006631,GO:0006635,GO:0016491,GO:0016627,GO:0055114,GO:0071949	acyl-CoA oxidase activity,peroxisome,fatty acid metabolic process,fatty acid beta-oxidation,oxidoreductase activity,oxidoreductase activity, acting on the CH-CH group of donors,oxidation-reduction process,FAD binding
LOC5569782	936.888	-0.640795	0.175355	-3.65426	0.000257921	0.005207	AAEL007920
LOC5579955	18556.2	-0.873188	0.239176	-3.65081	0.000261415	0.00526257	AAEL007592
LOC5566847	6666.23	-0.351859	0.0963847	-3.65057	0.00026166	0.00526257	AAEL000795	ubiquitin [Source:VB Community Annotation]			GO:0005515	protein binding
LOC5577462	34.2071	1.45264	0.39794	3.65039	0.000261843	0.00526257	AAEL013211				GO:0000166,GO:0004371,GO:0005524,GO:0006071,GO:0016301,GO:0016310,GO:0016740,GO:0034012	nucleotide binding,glycerone kinase activity,ATP binding,glycerol metabolic process,kinase activity,phosphorylation,transferase activity,FAD-AMP lyase (cyclizing) activity
LOC5576144	174.731	-1.37241	0.376125	-3.64881	0.000263462	0.00528725	AAEL012344	lipase 1 precursor [Source:VB Community Annotation]			GO:0016042,GO:0016787,GO:0016788	lipid catabolic process,hydrolase activity,hydrolase activity, acting on ester bonds
LOC5563985	82.3298	-2.56129	0.702065	-3.64823	0.000264054	0.00529126	AAEL004021	Glucose dehydrogenase [Source:UniProtKB/TrEMBL;Acc:A0A1S4F6C5]			GO:0016614,GO:0050660,GO:0055114	oxidoreductase activity, acting on CH-OH group of donors,flavin adenine dinucleotide binding,oxidation-reduction process
LOC5567113	298.605	0.621937	0.170536	3.64696	0.000265364	0.00530964	AAEL015300				GO:0016757	transferase activity, transferring glycosyl groups
LOC5578734	930.854	0.427377	0.117203	3.64648	0.000265862	0.00531173	AAEL003661	translation initiation factor [Source:VB Community Annotation]			GO:0003743,GO:0005634,GO:0005730,GO:0005737,GO:0006412,GO:0006413,GO:0042254,GO:0042256,GO:0042273,GO:0043022,GO:0043023	translation initiation factor activity,nucleus,nucleolus,cytoplasm,translation,translational initiation,ribosome biogenesis,mature ribosome assembly,ribosomal large subunit biogenesis,ribosome binding,ribosomal large subunit binding
LOC5571444	3686.98	0.410367	0.112676	3.64201	0.000270519	0.00539679	AAEL009080	importin 7, [Source:VB Community Annotation]			GO:0005634,GO:0006886,GO:0008536	nucleus,intracellular protein transport,Ran GTPase binding
LOC5566935	898.934	0.430893	0.118412	3.63895	0.000273757	0.00545333	AAEL005709	n-acetyltransferase separation anxiety [Source:VB Community Annotation]			GO:0008080	N-acetyltransferase activity
LOC5577028	546.761	-0.792501	0.217887	-3.63721	0.000275603	0.00548202	AAEL012952				GO:0008080	N-acetyltransferase activity
LOC5565181	424.48	-0.993254	0.273342	-3.63373	0.000279348	0.00554834	AAEL004646	actin [Source:VB Community Annotation]
LOC5573525	169.308	0.703456	0.193618	3.63322	0.000279901	0.00555117	AAEL010563	tyrosyl-tRNA synthetase [Source:VB Community Annotation]			GO:0000166,GO:0003723,GO:0004812,GO:0004831,GO:0005524,GO:0006412,GO:0006418,GO:0006437,GO:0016874	nucleotide binding,RNA binding,aminoacyl-tRNA ligase activity,tyrosine-tRNA ligase activity,ATP binding,translation,tRNA aminoacylation for protein translation,tyrosyl-tRNA aminoacylation,ligase activity
LOC110680664	1711.59	-0.423045	0.116581	-3.62877	0.00028477	0.00563945	AAEL020754
LOC5575813	1978.11	-0.485064	0.133694	-3.62816	0.000285454	0.00564471	AAEL012069	glutathione peroxidase [Source:VB Community Annotation]	GPXH1		GO:0004601,GO:0004602,GO:0006979,GO:0016491,GO:0055114,GO:0098869	peroxidase activity,glutathione peroxidase activity,response to oxidative stress,oxidoreductase activity,oxidation-reduction process,cellular oxidant detoxification
LOC110678869	381.807	-0.931398	0.256914	-3.62533	0.000288595	0.00569849	AAEL020034
LOC5566095	148.776	0.797256	0.219993	3.62401	0.000290071	0.00571926	AAEL005163	60S ribosome subunit biogenesis protein NIP7 homolog [Source:UniProtKB/TrEMBL;Acc:Q17AX1]			GO:0003723,GO:0005634,GO:0005730,GO:0042254,GO:0042255	RNA binding,nucleus,nucleolus,ribosome biogenesis,ribosome assembly
LOC5566631	49279.5	0.726503	0.200647	3.62081	0.000293684	0.00578206	AAEL021888
LOC5573436	454.105	-0.947343	0.261884	-3.61741	0.000297567	0.00584998	AAEL010485	sugar transporter [Source:VB Community Annotation]			GO:0016020,GO:0016021,GO:0022857,GO:0055085	membrane,integral component of membrane,transmembrane transporter activity,transmembrane transport
LOC5570084	34.3542	-2.14405	0.593627	-3.61178	0.000304098	0.0059697	AAEL001346				GO:0016020,GO:0016021	membrane,integral component of membrane
LOC110679201	44.4618	1.55219	0.429955	3.61012	0.00030606	0.00599949	AAEL025657
LOC5574205	128.232	-1.15219	0.319206	-3.60955	0.000306731	0.00600393	AAEL002307	leucine-rich transmembrane protein [Source:VB Community Annotation]			GO:0005515,GO:0016020,GO:0016021	protein binding,membrane,integral component of membrane
LOC5572992	526.857	1.38384	0.383602	3.60749	0.00030917	0.0060429	AAEL001952	28 kDa heat- and acid-stable phosphoprotein (PDGF-associated protein), putative [Source:UniProtKB/TrEMBL;Acc:Q1HQX2]
LOC5566771	577.608	0.682596	0.189462	3.60281	0.000314796	0.00613768	AAEL005635	nucleoporin [Source:VB Community Annotation]			GO:0005634,GO:0005643,GO:0015031,GO:0046907,GO:0051028	nucleus,nuclear pore,protein transport,intracellular transport,mRNA transport
LOC5576119	819.233	0.719566	0.19973	3.6027	0.000314928	0.00613768	AAEL002810	DNA replication licensing factor MCM5 [Source:VB Community Annotation]			GO:0000166,GO:0003677,GO:0003678,GO:0003688,GO:0004386,GO:0005524,GO:0005634,GO:0006260,GO:0006270,GO:0016787,GO:0032508,GO:0042555	nucleotide binding,DNA binding,DNA helicase activity,DNA replication origin binding,helicase activity,ATP binding,nucleus,DNA replication,DNA replication initiation,hydrolase activity,DNA duplex unwinding,MCM complex
LOC5563647	225.336	0.679983	0.188775	3.60209	0.000315672	0.00614333	AAEL000046				GO:0005634,GO:0005730	nucleus,nucleolus
LOC5573618	7636.26	-0.983716	0.273357	-3.59865	0.000319878	0.00621623	AAEL010609				GO:0006030,GO:0008061,GO:0016020,GO:0016021	chitin metabolic process,chitin binding,membrane,integral component of membrane
LOC5567773	36.9327	-1.15492	0.321209	-3.59554	0.000323719	0.0062785	AAEL000146	nitrilase, putative [Source:VB Community Annotation]			GO:0006807	nitrogen compound metabolic process
LOC23687789	11.1224	-2.68033	0.745509	-3.5953	0.000324013	0.0062785	AAEL023387
LOC5567148	9.03887	3.28771	0.915113	3.59269	0.000327284	0.00633281	AAEL027068
LOC5568044	85.1359	-1.0924	0.304649	-3.58575	0.00033611	0.00649429	AAEL006485	inosine-uridine preferring nucleoside hydrolase [Source:VB Community Annotation]			GO:0016787	hydrolase activity
LOC5570671	226.392	0.604043	0.168522	3.58435	0.000337913	0.00651367	AAEL008469
LOC5564405	2468.67	-0.462315	0.128986	-3.58423	0.000338078	0.00651367	AAEL004229	glutathione transferase [Source:VB Community Annotation]	GSTT4		GO:0004364,GO:0005515	glutathione transferase activity,protein binding
LOC5563663	221.247	1.26868	0.354047	3.58336	0.000339203	0.00652603	AAEL000037	Clip-Domain Serine Protease family B. [Source:VB Community Annotation]	CLIPB35		GO:0004252,GO:0005576,GO:0006508,GO:0008233,GO:0008236,GO:0016787	serine-type endopeptidase activity,extracellular region,proteolysis,peptidase activity,serine-type peptidase activity,hydrolase activity
LOC110679116	37.1502	-1.34287	0.375279	-3.57832	0.000345816	0.0066438	AAEL020989
LOC5570789	773.716	-0.88577	0.247575	-3.57779	0.000346514	0.00664775	AAEL008560	glucosyl/glucuronosyl transferases [Source:VB Community Annotation]			GO:0008194,GO:0015020,GO:0016020,GO:0016021,GO:0016740,GO:0016757,GO:0016758	UDP-glycosyltransferase activity,glucuronosyltransferase activity,membrane,integral component of membrane,transferase activity,transferase activity, transferring glycosyl groups,transferase activity, transferring hexosyl groups
LOC5578178	366.552	0.541296	0.151322	3.57712	0.000347397	0.00665525	AAEL013790	mitochondrial ribosomal protein, L50 [Source:VB Community Annotation]	mRpL50		GO:0005739,GO:0005840	mitochondrion,ribosome
LOC5574849	50.4393	2.87147	0.803044	3.57574	0.00034924	0.00668106	AAEL011454
LOC5573294	401.27	-0.770085	0.215591	-3.57198	0.000354298	0.00676824	AAEL010384	aldehyde oxidase [Source:VB Community Annotation]			GO:0005506,GO:0005777,GO:0009055,GO:0016491,GO:0022900,GO:0046872,GO:0050660,GO:0051536,GO:0051537,GO:0055114,GO:0071949	iron ion binding,peroxisome,electron transfer activity,oxidoreductase activity,electron transport chain,metal ion binding,flavin adenine dinucleotide binding,iron-sulfur cluster binding,2 iron, 2 sulfur cluster binding,oxidation-reduction process,FAD binding
LOC5571537	876.847	-0.687714	0.192595	-3.57078	0.000355921	0.00678965	AAEL009128	cytochrome P450 [Source:VB Community Annotation]	CYP6M6		GO:0004497,GO:0005506,GO:0016491,GO:0016705,GO:0020037,GO:0046872,GO:0055114	monooxygenase activity,iron ion binding,oxidoreductase activity,oxidoreductase activity, acting on paired donors, with incorporation or reduction of molecular oxygen,heme binding,metal ion binding,oxidation-reduction process
LOC5575525	337.027	-0.62519	0.175239	-3.56765	0.000360201	0.0068616	AAEL021608
LOC5568127	699.46	-0.511203	0.143361	-3.56585	0.000362684	0.00689918	AAEL006550	rnf5 [Source:VB Community Annotation]			GO:0016020,GO:0016021,GO:0046872	membrane,integral component of membrane,metal ion binding
LOC5566222	219.556	-0.66163	0.185613	-3.56457	0.000364449	0.00692299	AAEL025226				GO:0005515,GO:0046872	protein binding,metal ion binding
LOC110674873	78.3872	-1.10969	0.311598	-3.56128	0.000369047	0.00700049	AAEL023750
LOC5564288	104.078	0.964132	0.27108	3.55664	0.00037563	0.00711538	AAEL014382	C-Type Lectin (CTL) - mannose binding. [Source:VB Community Annotation]	CTLMA14		GO:0030246	carbohydrate binding
LOC5572120	99.7359	-0.728531	0.205046	-3.55302	0.000380833	0.00720382	AAEL009533				GO:0005515,GO:0005634,GO:0016567	protein binding,nucleus,protein ubiquitination
LOC5575931	999.806	-0.394425	0.11129	-3.54413	0.000393909	0.00742978	AAEL012161				GO:0006081,GO:0016020,GO:0016021,GO:0016491,GO:0016620,GO:0055114	cellular aldehyde metabolic process,membrane,integral component of membrane,oxidoreductase activity,oxidoreductase activity, acting on the aldehyde or oxo group of donors, NAD or NADP as acceptor,oxidation-reduction process
LOC110681390	205.378	-0.599864	0.169264	-3.54395	0.000394173	0.00742978	AAEL024591				GO:0042274	ribosomal small subunit biogenesis
LOC5567414	867.644	0.565658	0.15962	3.54378	0.000394429	0.00742978	AAEL025199				GO:0000166,GO:0003824,GO:0004329,GO:0004486,GO:0004488,GO:0005524,GO:0006730,GO:0016874,GO:0035999,GO:0055114	nucleotide binding,catalytic activity,formate-tetrahydrofolate ligase activity,methylenetetrahydrofolate dehydrogenase [NAD(P)+] activity,methylenetetrahydrofolate dehydrogenase (NADP+) activity,ATP binding,one-carbon metabolic process,ligase activity,tetrahydrofolate interconversion,oxidation-reduction process
LOC5565904	2530.35	-0.817237	0.230657	-3.54308	0.000395485	0.00743931	AAEL018117
LOC110680765	328.424	1.36966	0.386631	3.54256	0.00039626	0.00744351	AAEL023816
LOC110678063	29.7783	1.34479	0.37971	3.54163	0.00039766	0.00745943	AAEL020062
LOC5577316	820.437	-0.434388	0.122669	-3.54113	0.000398418	0.0074633	AAEL013163				GO:0016020,GO:0016021	membrane,integral component of membrane
LOC5576917	491.942	0.604408	0.170765	3.53941	0.000401021	0.00750166	AAEL012860
LOC5574896	19.795	-1.92828	0.545705	-3.53356	0.000410006	0.00765043	AAEL011501				GO:0042302	structural constituent of cuticle
LOC5566213	231.938	0.637762	0.18049	3.53349	0.000410107	0.00765043	AAEL005281				GO:0005634,GO:0005637,GO:0005639,GO:0016020,GO:0016021	nucleus,nuclear inner membrane,integral component of nuclear inner membrane,membrane,integral component of membrane
LOC5576483	817.512	0.448652	0.12703	3.53187	0.00041264	0.00767708	AAEL002898				GO:0006729,GO:0008124,GO:0016829	tetrahydrobiopterin biosynthetic process,4-alpha-hydroxytetrahydrobiopterin dehydratase activity,lyase activity
LOC5565797	52.7946	-0.998416	0.28269	-3.53184	0.000412673	0.00767708	AAEL005000				GO:0005634	nucleus
LOC5568277	377.524	0.865856	0.245299	3.5298	0.000415879	0.00772609	AAEL006712	serine/threonine protein kinase [Source:VB Community Annotation]			GO:0000166,GO:0004672,GO:0004674,GO:0005524,GO:0005694,GO:0006468,GO:0007094,GO:0016301,GO:0016310,GO:0016740,GO:0032133,GO:0032467,GO:0043988,GO:0046872	nucleotide binding,protein kinase activity,protein serine/threonine kinase activity,ATP binding,chromosome,protein phosphorylation,mitotic spindle assembly checkpoint,kinase activity,phosphorylation,transferase activity,chromosome passenger complex,positive regulation of cytokinesis,histone H3-S28 phosphorylation,metal ion binding
LOC110675216	252.336	0.735269	0.208406	3.52806	0.000418617	0.00776626	AAEL024000				GO:0005549	odorant binding
LOC5566327	229.125	0.589399	0.167115	3.5269	0.000420451	0.0077896	AAEL005313
LOC5566392	724.102	-0.412201	0.116925	-3.52533	0.000422949	0.00782513	AAEL005342
LOC5564539	1077.76	0.514625	0.146012	3.52453	0.000424235	0.0078382	AAEL019896				GO:0000027,GO:0005524,GO:0005634,GO:0005654,GO:0005730,GO:0016887	ribosomal large subunit assembly,ATP binding,nucleus,nucleoplasm,nucleolus,ATPase activity
LOC5573651	667.358	0.640806	0.181917	3.52253	0.000427455	0.0078869	AAEL010644	ribonucleoside-diphosphate reductase large chain [Source:VB Community Annotation]			GO:0000166,GO:0003824,GO:0004748,GO:0005524,GO:0006260,GO:0008152,GO:0016491,GO:0055114	nucleotide binding,catalytic activity,ribonucleoside-diphosphate reductase activity, thioredoxin disulfide as acceptor,ATP binding,DNA replication,metabolic process,oxidoreductase activity,oxidation-reduction process
LOC5567854	5047.33	0.570387	0.162036	3.52012	0.000431346	0.00794783	AAEL026069				GO:0000166,GO:0003824,GO:0003989,GO:0005524,GO:0006629,GO:0006631,GO:0006633,GO:0008152,GO:0016874,GO:0046872,GO:2001295	nucleotide binding,catalytic activity,acetyl-CoA carboxylase activity,ATP binding,lipid metabolic process,fatty acid metabolic process,fatty acid biosynthetic process,metabolic process,ligase activity,metal ion binding,malonyl-CoA biosynthetic process
LOC5580217	885.422	-0.943856	0.268238	-3.51873	0.000433619	0.00797459	AAEL024686
LOC5567651	556.535	-0.595595	0.169275	-3.51851	0.00043398	0.00797459	AAEL006235
LOC5564273	866.913	-0.877645	0.249687	-3.51498	0.000439783	0.00807025	AAEL014371	glucosyl/glucuronosyl transferases [Source:VB Community Annotation]			GO:0008194,GO:0015020,GO:0016020,GO:0016021,GO:0016740,GO:0016757,GO:0016758	UDP-glycosyltransferase activity,glucuronosyltransferase activity,membrane,integral component of membrane,transferase activity,transferase activity, transferring glycosyl groups,transferase activity, transferring hexosyl groups
LOC5569259	81.247	-1.80621	0.514188	-3.51273	0.000443524	0.00811879	AAEL007519	oviductin [Source:VB Community Annotation]			GO:0004252,GO:0006508,GO:0008233,GO:0008236,GO:0016787	serine-type endopeptidase activity,proteolysis,peptidase activity,serine-type peptidase activity,hydrolase activity
LOC5570727	2202.81	0.428529	0.121995	3.51267	0.00044363	0.00811879	AAEL018237				GO:0003824,GO:0004721,GO:0004722,GO:0006470,GO:0016787,GO:0016791,GO:0043169,GO:0046872	catalytic activity,phosphoprotein phosphatase activity,protein serine/threonine phosphatase activity,protein dephosphorylation,hydrolase activity,phosphatase activity,cation binding,metal ion binding
LOC5579933	508.283	-0.749297	0.213551	-3.50876	0.000450208	0.00822803	AAEL028635				GO:0004497,GO:0005506,GO:0016021,GO:0016491,GO:0016705,GO:0020037,GO:0046872,GO:0055114	monooxygenase activity,iron ion binding,integral component of membrane,oxidoreductase activity,oxidoreductase activity, acting on paired donors, with incorporation or reduction of molecular oxygen,heme binding,metal ion binding,oxidation-reduction process
LOC110676379	87.9834	-2.46646	0.703195	-3.50751	0.000452328	0.0082556	AAEL027145				GO:0005615	extracellular space
LOC5569984	11061.1	0.375774	0.107158	3.50672	0.000453672	0.00826895	AAEL008073				GO:0003723	RNA binding
LOC5577089	193.203	0.739208	0.211137	3.50108	0.000463372	0.00843436	AAEL012993
LOC5577784	633.624	0.456534	0.1305	3.49835	0.000468153	0.00850992	AAEL013374	disconnected protein [Source:VB Community Annotation]			GO:0003676,GO:0005634,GO:0046872	nucleic acid binding,nucleus,metal ion binding
LOC5571788	2628.41	-0.752321	0.215078	-3.4979	0.000468937	0.00851272	AAEL027166				GO:0006508,GO:0008237,GO:0008241,GO:0016020	proteolysis,metallopeptidase activity,peptidyl-dipeptidase activity,membrane
LOC5573637	63.1786	-2.25743	0.645491	-3.49723	0.000470114	0.00852264	AAEL010627				GO:0016020,GO:0016021	membrane,integral component of membrane
LOC5572121	886.372	0.420408	0.120259	3.49587	0.000472515	0.00854322	AAEL009526				GO:0005739,GO:0005743,GO:0005751,GO:0016020,GO:0016021,GO:0031305,GO:0033617	mitochondrion,mitochondrial inner membrane,mitochondrial respiratory chain complex IV,membrane,integral component of membrane,integral component of mitochondrial inner membrane,mitochondrial cytochrome c oxidase assembly
LOC5572122	886.372	0.420408	0.120259	3.49587	0.000472515	0.00854322	AAEL009534	dimethyladenosine transferase [Source:VB Community Annotation]			GO:0000154,GO:0000179,GO:0003723,GO:0006364,GO:0008168,GO:0008649,GO:0016740,GO:0031167,GO:0032259	rRNA modification,rRNA (adenine-N6,N6-)-dimethyltransferase activity,RNA binding,rRNA processing,methyltransferase activity,rRNA methyltransferase activity,transferase activity,rRNA methylation,methylation
LOC5564130	1080.29	-0.781043	0.223481	-3.4949	0.000474247	0.00856308	AAEL004102	aldo-keto reductase [Source:VB Community Annotation]			GO:0016491,GO:0055114	oxidoreductase activity,oxidation-reduction process
LOC5575305	1794.29	-0.361875	0.103615	-3.49251	0.000478496	0.00862089	AAEL002578				GO:0016020,GO:0016021,GO:0019991	membrane,integral component of membrane,septate junction assembly
LOC5577961	32.511	1.22167	0.349808	3.49239	0.000478726	0.00862089	AAEL013444
LOC5574383	1626.53	-0.411365	0.117941	-3.48788	0.000486864	0.00875578	AAEL011102	lysosomal-associated transmembrane protein [Source:VB Community Annotation]			GO:0016020,GO:0016021	membrane,integral component of membrane
LOC5572570	67.126	0.958477	0.274938	3.48616	0.000490005	0.00880054	AAEL025471				GO:0005179,GO:0005576	hormone activity,extracellular region
LOC5566521	1992.74	-0.789343	0.22652	-3.48465	0.000492782	0.00883866	AAEL005458	protein withered, carnitine O-palmitoyltransferase [Source:VB Community Annotation]	whd		GO:0004095,GO:0005739,GO:0005741,GO:0006629,GO:0006631,GO:0006635,GO:0016020,GO:0016021,GO:0016740,GO:0016746	carnitine O-palmitoyltransferase activity,mitochondrion,mitochondrial outer membrane,lipid metabolic process,fatty acid metabolic process,fatty acid beta-oxidation,membrane,integral component of membrane,transferase activity,transferase activity, transferring acyl groups
LOC5577450	1607.62	0.96098	0.275908	3.48297	0.000495887	0.00888255	AAEL013197
LOC5575100	269.016	0.509802	0.146423	3.48171	0.000498219	0.0089125	AAEL011666	mitochondrial ribosomal protein, L41, putative [Source:VB Community Annotation]	mRpL41		GO:0005739,GO:0005840	mitochondrion,ribosome
LOC5571059	407.283	-0.52686	0.151376	-3.48046	0.000500556	0.00893791	AAEL008793
LOC5572450	852.345	0.763734	0.219449	3.48024	0.000500962	0.00893791	AAEL001835	sodium/solute symporter [Source:VB Community Annotation]			GO:0016020,GO:0016021,GO:0022857,GO:0055085	membrane,integral component of membrane,transmembrane transporter activity,transmembrane transport
LOC5565981	1060.55	0.426681	0.122629	3.47946	0.000502432	0.0089523	AAEL005092	n-myristoyl transferase [Source:VB Community Annotation]			GO:0004379,GO:0006499,GO:0016740,GO:0016746	glycylpeptide N-tetradecanoyltransferase activity,N-terminal protein myristoylation,transferase activity,transferase activity, transferring acyl groups
LOC5575326	302.946	0.973864	0.279992	3.47819	0.000504814	0.00898289	AAEL002601	Clip-Domain Serine Protease family A. Protease homologue. [Source:VB Community Annotation]	CLIPA1		GO:0004252,GO:0006508	serine-type endopeptidase activity,proteolysis
LOC5569077	818.675	-0.416032	0.119626	-3.47778	0.00050559	0.00898486	AAEL001205	ubiquitin protein ligase [Source:VB Community Annotation]			GO:0004842,GO:0005515,GO:0006511,GO:0016567,GO:0061630	ubiquitin-protein transferase activity,protein binding,ubiquitin-dependent protein catabolic process,protein ubiquitination,ubiquitin protein ligase activity
LOC5568197	424.356	0.584741	0.168273	3.47496	0.000510933	0.00906789	AAEL027342				GO:0016020,GO:0016021	membrane,integral component of membrane
LOC5579667	47.9856	-1.02547	0.295282	-3.47284	0.000514973	0.00912759	AAEL024317				GO:0003824,GO:0008484	catalytic activity,sulfuric ester hydrolase activity
LOC5578231	712.612	-0.389784	0.11234	-3.46968	0.000521079	0.00922371	AAEL024204				GO:0005515	protein binding
LOC5573438	1128.54	-0.498834	0.143795	-3.46907	0.000522255	0.00923243	AAEL010480	serine-pyruvate aminotransferase [Source:VB Community Annotation]			GO:0003824,GO:0004760,GO:0008453,GO:0008483,GO:0016740	catalytic activity,serine-pyruvate transaminase activity,alanine-glyoxylate transaminase activity,transaminase activity,transferase activity
LOC5569813	40.3328	1.17191	0.337857	3.46865	0.00052308	0.00923492	AAEL001305
LOC5573712	3457.08	-0.390002	0.112449	-3.46826	0.000523838	0.00923623	AAEL010697	3-ketoacyl-coa thiolase, mitochondrial (beta- ketothiolase) (acetyl-coa acyltransferase) (mitochondrial 3-oxoacyl- coa thiolase) [Source:VB Community Annotation]			GO:0003824,GO:0016740,GO:0016746,GO:0016747	catalytic activity,transferase activity,transferase activity, transferring acyl groups,transferase activity, transferring acyl groups other than amino-acyl groups
LOC5574064	1376.71	0.388316	0.112012	3.46673	0.00052684	0.00927705	AAEL010900	importin alpha [Source:VB Community Annotation]			GO:0005515,GO:0005634,GO:0005737,GO:0006606,GO:0008565,GO:0015031,GO:0042025,GO:0061608	protein binding,nucleus,cytoplasm,protein import into nucleus,obsolete protein transporter activity,protein transport,host cell nucleus,nuclear import signal receptor activity
LOC5573243	503.589	0.599022	0.17293	3.46395	0.000532304	0.00935986	AAEL010341	RuvB-like helicase 2 (EC 3.6.4.12)(Reptin) [Source:VB Community Annotation]	rept		GO:0000166,GO:0003678,GO:0003714,GO:0004386,GO:0005524,GO:0005634,GO:0006281,GO:0006325,GO:0006974,GO:0016573,GO:0016787,GO:0031011,GO:0032508,GO:0035267,GO:0042127,GO:0043139,GO:0043141,GO:0043486,GO:0090090,GO:0097255,GO:1903507	nucleotide binding,DNA helicase activity,transcription corepressor activity,helicase activity,ATP binding,nucleus,DNA repair,chromatin organization,cellular response to DNA damage stimulus,histone acetylation,hydrolase activity,Ino80 complex,DNA duplex unwinding,NuA4 histone acetyltransferase complex,regulation of cell population proliferation,5'-3' DNA helicase activity,GO_0043141,histone exchan…
LOC110680439	652.945	0.657633	0.189868	3.46364	0.000532928	0.00935986	AAEL023255	Ribonucleoside-diphosphate reductase [Source:UniProtKB/TrEMBL;Acc:Q8WRS8]
LOC5575074	734.573	0.686865	0.198428	3.46153	0.000537113	0.00942111	AAEL011639	WAP four-disulfide core domain protein 2 precursor, putative [Source:VB Community Annotation]			GO:0005576,GO:0010466,GO:0030414	extracellular region,negative regulation of peptidase activity,peptidase inhibitor activity
LOC5565702	3923.85	0.386506	0.111669	3.46118	0.000537812	0.00942112	AAEL014943
LOC5578774	287.675	0.920058	0.265938	3.45967	0.000540833	0.00946178	AAEL003656
LOC5573073	1952.49	-0.643603	0.186091	-3.45854	0.000543109	0.00948931	AAEL010264
LOC5572959	9.15921	-5.6519	1.63452	-3.45783	0.000544545	0.0095021	AAEL010186
LOC5565367	652.821	-1.04068	0.301036	-3.45698	0.000546256	0.00951954	AAEL004778	acyl-coa dehydrogenase [Source:VB Community Annotation]			GO:0003995,GO:0016491,GO:0016627,GO:0050660,GO:0055114	acyl-CoA dehydrogenase activity,oxidoreductase activity,oxidoreductase activity, acting on the CH-CH group of donors,flavin adenine dinucleotide binding,oxidation-reduction process
LOC5569822	602.94	-0.568995	0.164609	-3.45664	0.000546954	0.00951954	AAEL001312	Cytochrome P450 monooxygenase CYP9M6v2 [Source:UniProtKB/TrEMBL;Acc:X5HYQ8]	CYP9M6		GO:0004497,GO:0005506,GO:0016020,GO:0016021,GO:0016491,GO:0016705,GO:0020037,GO:0046872,GO:0055114	monooxygenase activity,iron ion binding,membrane,integral component of membrane,oxidoreductase activity,oxidoreductase activity, acting on paired donors, with incorporation or reduction of molecular oxygen,heme binding,metal ion binding,oxidation-reduction process
LOC5565876	509.435	-0.482161	0.139561	-3.45484	0.000550613	0.00957089	AAEL015014				GO:0016020,GO:0016021	membrane,integral component of membrane
LOC5565478	136.46	-0.660819	0.191305	-3.45427	0.000551775	0.00957876	AAEL020941				GO:0004181,GO:0006508,GO:0008270	metallocarboxypeptidase activity,proteolysis,zinc ion binding
LOC5575325	288.699	0.797838	0.231016	3.45361	0.000553138	0.0095901	AAEL002580				GO:0004252,GO:0006508,GO:0008233	serine-type endopeptidase activity,proteolysis,peptidase activity
LOC110678443	215.324	-0.771227	0.223349	-3.45302	0.000554357	0.00959891	AAEL027700
LOC5574713	956.991	-0.358923	0.104015	-3.45069	0.000559159	0.00966966	AAEL011355	carnitine o-acetyltransferase [Source:VB Community Annotation]			GO:0016740,GO:0016746	transferase activity,transferase activity, transferring acyl groups
LOC5568558	17261.8	0.570426	0.165406	3.44865	0.000563399	0.00973052	AAEL001134	Probable methylmalonate-semialdehyde dehydrogenase [acylating], mitochondrial Precursor (Malonate-semialdehyde dehydrogenase [acylating])(MMSDH)(EC 1.2.1.27)(EC 1.2.1.18) [Source:VB Community Annotation]			GO:0004491,GO:0005739,GO:0006573,GO:0016491,GO:0016620,GO:0018478,GO:0019859,GO:0055114	methylmalonate-semialdehyde dehydrogenase (acylating) activity,mitochondrion,valine metabolic process,oxidoreductase activity,oxidoreductase activity, acting on the aldehyde or oxo group of donors, NAD or NADP as acceptor,malonate-semialdehyde dehydrogenase (acetylating) activity,thymine metabolic process,oxidation-reduction process
LOC5569517	130.344	0.866014	0.251292	3.44624	0.000568445	0.00979812	AAEL007697				GO:0005730,GO:0006364,GO:0032040,GO:0042254	nucleolus,rRNA processing,small-subunit processome,ribosome biogenesis
LOC5565277	150.835	0.959202	0.278345	3.44609	0.000568764	0.00979812	AAEL019489				GO:0000981,GO:0003677,GO:0005634,GO:0006355,GO:0006357,GO:0043565,GO:0046872	DNA-binding transcription factor activity, RNA polymerase II-specific,DNA binding,nucleus,regulation of transcription, DNA-templated,regulation of transcription by RNA polymerase II,sequence-specific DNA binding,metal ion binding
LOC5569161	1484.46	0.645231	0.187305	3.44481	0.000571461	0.00983205	AAEL020689				GO:0005515	protein binding
LOC5571153	3339.24	0.897699	0.26079	3.44223	0.000576948	0.00991382	AAEL008849	selenophosphate synthase [Source:VB Community Annotation]			GO:0004756,GO:0005524,GO:0016260,GO:0016301,GO:0016310,GO:0016740	selenide, water dikinase activity,ATP binding,selenocysteine biosynthetic process,kinase activity,phosphorylation,transferase activity
LOC23687430	427.862	0.433635	0.126001	3.44153	0.000578443	0.00992687	AAEL017010	DNA-directed RNA polymerase subunit beta [Source:UniProtKB/TrEMBL;Acc:J9E9J9]			GO:0003677,GO:0003899,GO:0005634,GO:0006351,GO:0016740,GO:0016779,GO:0032549	DNA binding,DNA-directed 5'-3' RNA polymerase activity,nucleus,transcription, DNA-templated,transferase activity,nucleotidyltransferase activity,ribonucleoside binding
LOC5576420	1375.93	0.403475	0.117263	3.44076	0.000580079	0.00993429	AAEL012507	prefoldin, subunit, putative [Source:VB Community Annotation]			GO:0006457,GO:0016272,GO:0051082	protein folding,prefoldin complex,unfolded protein binding
LOC5565024	328.696	0.481972	0.140082	3.44064	0.000580346	0.00993429	AAEL014704	U3 small nucleolar RNA (U3 snoRNA) associated protein [Source:VB Community Annotation]			GO:0005515,GO:0005730,GO:0016567	protein binding,nucleolus,protein ubiquitination
LOC5573633	4.64545	-5.66857	1.64802	-3.43963	0.000582517	0.00995883	AAEL010624	Osiris, putative [Source:VB Community Annotation]			GO:0016020,GO:0016021	membrane,integral component of membrane
LOC5572221	276.692	0.62545	0.181917	3.43811	0.000585794	0.00999541	AAEL009662
LOC5576014	321.393	0.517759	0.150601	3.43795	0.000586137	0.00999541	AAEL012235	Ribosome biogenesis protein NOP53 [Source:UniProtKB/TrEMBL;Acc:A0A1S4FVP6]			GO:0000027,GO:0005634,GO:0005654,GO:0005730,GO:0042254	ribosomal large subunit assembly,nucleus,nucleoplasm,nucleolus,ribosome biogenesis
LOC5564969	349.275	-0.552019	0.160631	-3.43657	0.000589127	0.0100337	AAEL020151
LOC5571747	827.668	0.622573	0.181212	3.43561	0.000591217	0.0100566	AAEL009273	inosine-5-monophosphate dehydrogenase [Source:VB Community Annotation]			GO:0000166,GO:0003824,GO:0003938,GO:0005737,GO:0006164,GO:0006177,GO:0016491,GO:0046872,GO:0055114	nucleotide binding,catalytic activity,IMP dehydrogenase activity,cytoplasm,purine nucleotide biosynthetic process,GMP biosynthetic process,oxidoreductase activity,metal ion binding,oxidation-reduction process
LOC5578621	780.502	-0.480792	0.140015	-3.43386	0.000595059	0.0101093	AAEL003599	Sulfiredoxin [Source:UniProtKB/TrEMBL;Acc:Q17F23]			GO:0000166,GO:0005524,GO:0016209,GO:0016491,GO:0032542,GO:0055114,GO:0098869	nucleotide binding,ATP binding,antioxidant activity,oxidoreductase activity,sulfiredoxin activity,oxidation-reduction process,cellular oxidant detoxification
LOC5572557	270.747	0.793901	0.231234	3.43333	0.000596212	0.0101161	AAEL009880	serine/threonine protein kinase [Source:VB Community Annotation]			GO:0000166,GO:0004672,GO:0004674,GO:0005524,GO:0006468,GO:0016301,GO:0016310,GO:0016740	nucleotide binding,protein kinase activity,protein serine/threonine kinase activity,ATP binding,protein phosphorylation,kinase activity,phosphorylation,transferase activity
LOC110673981	685.123	-0.534161	0.155662	-3.43154	0.00060016	0.0101615	AAEL010650	sodium/solute symporter [Source:VB Community Annotation]			GO:0016020,GO:0016021,GO:0022857,GO:0055085	membrane,integral component of membrane,transmembrane transporter activity,transmembrane transport
LOC110674350	3.32948	5.18765	1.5118	3.43144	0.000600388	0.0101615	AAEL023010
LOC5565405	6207.62	0.5188	0.151283	3.42933	0.000605074	0.0102279	AAEL014843	heat shock protein [Source:VB Community Annotation]			GO:0000166,GO:0005524,GO:0006457,GO:0051082	nucleotide binding,ATP binding,protein folding,unfolded protein binding
LOC5569338	3017.36	-0.339587	0.0990631	-3.42799	0.000608066	0.0102637	AAEL007546	actin-related protein 2/3 complex subunit 1A [Source:VB Community Annotation]			GO:0003779,GO:0005515,GO:0005737,GO:0005856,GO:0005885,GO:0015629,GO:0030833,GO:0034314	actin binding,protein binding,cytoplasm,cytoskeleton,Arp2/3 protein complex,actin cytoskeleton,regulation of actin filament polymerization,Arp2/3 complex-mediated actin nucleation
LOC5574695	2384.97	-0.758265	0.221217	-3.4277	0.000608709	0.0102637	AAEL011333				GO:0005576,GO:0006030,GO:0008061	extracellular region,chitin metabolic process,chitin binding
LOC5568146	157.434	-1.28635	0.375368	-3.4269	0.00061052	0.0102814	AAEL006581	juvenile hormone-inducible protein, putative [Source:VB Community Annotation]
LOC5569249	2809.08	-0.440946	0.128744	-3.42498	0.000614853	0.0103415	AAEL020508
LOC5578996	1103.8	-0.533966	0.156012	-3.42261	0.000620234	0.010419	AAEL003777				GO:0006914,GO:0034045	autophagy,phagophore assembly site membrane
LOC5570118	419.76	0.700239	0.204618	3.42217	0.000621226	0.0104227	AAEL008096	mitochondrial ornithine transporter [Source:VB Community Annotation]			GO:0016020,GO:0016021,GO:0022857	membrane,integral component of membrane,transmembrane transporter activity
LOC5564816	800.686	-0.471966	0.137956	-3.42113	0.000623622	0.0104299	AAEL014636	rhoGTPase [Source:VB Community Annotation]			GO:0003924,GO:0005515,GO:0005525,GO:0007264	GTPase activity,protein binding,GTP binding,small GTPase mediated signal transduction
LOC5569166	301.288	0.766132	0.223945	3.42107	0.00062375	0.0104299	AAEL007431				GO:0001522,GO:0006364,GO:0030515,GO:0042254	pseudouridine synthesis,rRNA processing,snoRNA binding,ribosome biogenesis
LOC5565447	259.341	0.622897	0.182082	3.42098	0.00062397	0.0104299	AAEL000677	DNA-directed RNA polymerase subunit rpb8 [Source:VB Community Annotation]			GO:0005634,GO:0005665,GO:0005666,GO:0005736,GO:0006351,GO:0006366,GO:0006383	nucleus,RNA polymerase II, core complex,RNA polymerase III complex,RNA polymerase I complex,transcription, DNA-templated,transcription by RNA polymerase II,transcription by RNA polymerase III
LOC110680778	663.626	0.4744	0.138705	3.42021	0.000625736	0.0104465	AAEL005877
LOC110674723	3.32306	5.18547	1.51667	3.41899	0.000628551	0.0104805	AAEL027070
LOC5565856	69.576	0.872144	0.255601	3.41212	0.000644591	0.0107347	AAEL005040	E3 ubiquitin-protein ligase [Source:UniProtKB/TrEMBL;Acc:Q17BB8]			GO:0005515,GO:0005634,GO:0005737,GO:0006511,GO:0007275,GO:0008270,GO:0016567,GO:0016740,GO:0042025,GO:0046872	protein binding,nucleus,cytoplasm,ubiquitin-dependent protein catabolic process,multicellular organism development,zinc ion binding,protein ubiquitination,transferase activity,host cell nucleus,metal ion binding
LOC110677928	44.64	1.08841	0.319059	3.41131	0.000646514	0.0107535	AAEL020293
LOC5566977	305.565	-0.616663	0.180853	-3.40976	0.000650205	0.0108016	AAEL005739				GO:0005515,GO:0016020,GO:0016021	protein binding,membrane,integral component of membrane
LOC5575820	398.237	-0.45272	0.132852	-3.40769	0.00065516	0.0108651	AAEL012093	leucine-rich transmembrane protein [Source:VB Community Annotation]			GO:0005515,GO:0016020,GO:0016021	protein binding,membrane,integral component of membrane
LOC5577341	97.106	0.876065	0.2571	3.40749	0.000655642	0.0108651	AAEL000408
LOC5572666	773.769	0.433156	0.127138	3.40697	0.000656892	0.010869	AAEL001845	short-chain dehydrogenase [Source:VB Community Annotation]			GO:0004757,GO:0006729,GO:0016491,GO:0055114	sepiapterin reductase activity,tetrahydrobiopterin biosynthetic process,oxidoreductase activity,oxidation-reduction process
LOC5576494	98.6504	-2.17356	0.63802	-3.40672	0.000657481	0.010869	AAEL002909	lysosomal acid lipase, putative [Source:VB Community Annotation]			GO:0006629,GO:0016042,GO:0016787,GO:0016788	lipid metabolic process,lipid catabolic process,hydrolase activity,hydrolase activity, acting on ester bonds
LOC5574253	475.865	-0.673547	0.197773	-3.40566	0.00066004	0.0108979	AAEL018208				GO:0004180,GO:0004181,GO:0006508,GO:0008270	carboxypeptidase activity,metallocarboxypeptidase activity,proteolysis,zinc ion binding
LOC5567592	603.41	0.54048	0.158745	3.4047	0.00066237	0.010923	AAEL006177	histone acetyltransferase type b catalytic subunit [Source:VB Community Annotation]			GO:0000781,GO:0004402,GO:0005634,GO:0006325,GO:0006348,GO:0016573,GO:0016740,GO:0016746,GO:0042393	chromosome, telomeric region,histone acetyltransferase activity,nucleus,chromatin organization,chromatin silencing at telomere,histone acetylation,transferase activity,transferase activity, transferring acyl groups,histone binding
LOC5574799	1207.71	-0.398601	0.117091	-3.40421	0.000663559	0.0109293	AAEL002487	P53 regulated pa26 nuclear protein sestrin [Source:VB Community Annotation]			GO:0005634,GO:0005737,GO:1901031	nucleus,cytoplasm,regulation of response to reactive oxygen species
LOC5565247	9.38722	-4.13771	1.21658	-3.40109	0.000671175	0.0110413	AAEL014770				GO:0042302	structural constituent of cuticle
LOC5572681	16636.4	0.433006	0.127334	3.40054	0.000672529	0.0110501	AAEL009955				GO:0005319,GO:0006869	lipid transporter activity,lipid transport
LOC5567287	880.769	0.732421	0.21543	3.39981	0.000674337	0.0110663	AAEL005951	lipid storage droplets surface binding protein [Source:VB Community Annotation]
LOC5566459	1466.08	-1.59774	0.470035	-3.3992	0.00067583	0.0110774	AAEL019639				GO:0004601,GO:0006979,GO:0020037,GO:0055114,GO:0098869	peroxidase activity,response to oxidative stress,heme binding,oxidation-reduction process,cellular oxidant detoxification
LOC5573604	204.622	0.660948	0.194629	3.39593	0.000683952	0.0111854	AAEL002108	nucleolar essential protein 1 (nep1) [Source:VB Community Annotation]			GO:0003723,GO:0008168,GO:0019843,GO:0042254	RNA binding,methyltransferase activity,rRNA binding,ribosome biogenesis
LOC110674699	5.19054	4.81631	1.41828	3.39588	0.000684076	0.0111854	AAEL026656
LOC5577200	124.557	-0.648307	0.190981	-3.39462	0.000687238	0.0112112	AAEL013083				GO:0016020,GO:0016021	membrane,integral component of membrane
LOC110680797	816.545	-0.376112	0.110798	-3.39459	0.000687317	0.0112112	AAEL024731
LOC5573116	1577.05	-0.392138	0.115596	-3.39232	0.000693044	0.011291	AAEL002031	cytochrome P450 [Source:VB Community Annotation]	CYP12F7		GO:0004497,GO:0005506,GO:0005789,GO:0016020,GO:0016491,GO:0016705,GO:0020037,GO:0031090,GO:0046872,GO:0055114	monooxygenase activity,iron ion binding,endoplasmic reticulum membrane,membrane,oxidoreductase activity,oxidoreductase activity, acting on paired donors, with incorporation or reduction of molecular oxygen,heme binding,organelle membrane,metal ion binding,oxidation-reduction process
LOC5578331	229.584	0.640729	0.188907	3.39178	0.00069441	0.0112996	AAEL003542				GO:0005634	nucleus
LOC23687717	233.062	-0.738077	0.217708	-3.39022	0.000698376	0.0113348	AAEL017297	cytochrome P450 [Source:VB Community Annotation]	CYP6M9		GO:0004497,GO:0005506,GO:0016491,GO:0016705,GO:0020037,GO:0046872,GO:0055114	monooxygenase activity,iron ion binding,oxidoreductase activity,oxidoreductase activity, acting on paired donors, with incorporation or reduction of molecular oxygen,heme binding,metal ion binding,oxidation-reduction process
LOC5575488	184.096	0.737319	0.217495	3.39005	0.000698809	0.0113348	AAEL011857	serine/threonine-protein kinase rio1 (rio kinase 1) [Source:VB Community Annotation]			GO:0000166,GO:0004674,GO:0005524,GO:0005737,GO:0006468,GO:0016301,GO:0016310,GO:0016740,GO:0016787,GO:0042254	nucleotide binding,protein serine/threonine kinase activity,ATP binding,cytoplasm,protein phosphorylation,kinase activity,phosphorylation,transferase activity,hydrolase activity,ribosome biogenesis
LOC5564179	2798.39	0.31598	0.0932111	3.38994	0.000699088	0.0113348	AAEL004141	phosphatidylinositol transfer protein/retinal degeneration b protein [Source:VB Community Annotation]			GO:0005548,GO:0015914	phospholipid transporter activity,phospholipid transport
LOC5565845	388.275	0.64192	0.189417	3.38892	0.000701673	0.0113631	AAEL005041	Ribosome biogenesis protein WDR12 homolog [Source:UniProtKB/Swiss-Prot;Acc:Q17BB0]			GO:0000463,GO:0000466,GO:0005515,GO:0005634,GO:0005654,GO:0005730,GO:0006364,GO:0030687,GO:0042254,GO:0042273,GO:0043021,GO:0070545	maturation of LSU-rRNA from tricistronic rRNA transcript (SSU-rRNA, 5.8S rRNA, LSU-rRNA),maturation of 5.8S rRNA from tricistronic rRNA transcript (SSU-rRNA, 5.8S rRNA, LSU-rRNA),protein binding,nucleus,nucleoplasm,nucleolus,rRNA processing,preribosome, large subunit precursor,ribosome biogenesis,ribosomal large subunit biogenesis,ribonucleoprotein complex binding,PeBoW complex
LOC5569441	401.424	0.446307	0.131733	3.38796	0.000704153	0.0113862	AAEL001238	bap28 [Source:VB Community Annotation]			GO:0005634,GO:0005730,GO:0006364,GO:0042254	nucleus,nucleolus,rRNA processing,ribosome biogenesis
LOC5576614	604.082	1.21994	0.360109	3.38771	0.000704786	0.0113862	AAEL012639
LOC5574921	359.028	-0.522203	0.154327	-3.38374	0.000715059	0.0115383	AAEL019927				GO:0004888,GO:0004930,GO:0007166,GO:0007186,GO:0016020,GO:0016021	transmembrane signaling receptor activity,G protein-coupled receptor activity,cell surface receptor signaling pathway,G protein-coupled receptor signaling pathway,membrane,integral component of membrane
LOC5573583	808.007	0.5514	0.163052	3.38175	0.00072026	0.0116084	AAEL002130	ecdysone inducible protein L2, putative [Source:VB Community Annotation]			GO:0005515,GO:0005886,GO:0007155,GO:0007411	protein binding,plasma membrane,cell adhesion,axon guidance
LOC5573623	1799.49	0.596796	0.176537	3.38058	0.000723328	0.0116439	AAEL010602	starch branching enzyme ii [Source:VB Community Annotation]			GO:0003824,GO:0003844,GO:0004553,GO:0005975,GO:0005978,GO:0008152,GO:0016740,GO:0016798,GO:0043169,GO:0102752	catalytic activity,1,4-alpha-glucan branching enzyme activity,hydrolase activity, hydrolyzing O-glycosyl compounds,carbohydrate metabolic process,glycogen biosynthetic process,metabolic process,transferase activity,hydrolase activity, acting on glycosyl bonds,cation binding,1,4-alpha-glucan branching enzyme activity (using a glucosylated glycogenin as primer for glycogen synthesis)
LOC5577984	1027.19	0.5941	0.175821	3.37901	0.000727485	0.0116969	AAEL013458	glutamine synthetase 1, 2 (glutamate-amonia ligase) (gs) [Source:VB Community Annotation]			GO:0000166,GO:0003824,GO:0004356,GO:0005524,GO:0006542,GO:0006807,GO:0016874	nucleotide binding,catalytic activity,glutamate-ammonia ligase activity,ATP binding,glutamine biosynthetic process,nitrogen compound metabolic process,ligase activity
LOC110676173	301.645	0.597576	0.176922	3.37763	0.000731125	0.0117415	AAEL019526
LOC5577721	1272.41	-0.382489	0.113263	-3.37701	0.000732797	0.0117542	AAEL013356				GO:0016020,GO:0016021	membrane,integral component of membrane
LOC23687918	64.0702	-0.941533	0.278844	-3.37656	0.000733973	0.0117542	AAEL017498	caspase [Source:VB Community Annotation]	CASPS21		GO:0004197,GO:0006508,GO:0006915,GO:0008234	cysteine-type endopeptidase activity,proteolysis,apoptotic process,cysteine-type peptidase activity
LOC5572456	2259.92	1.67214	0.495252	3.37635	0.000734532	0.0117542	AAEL001826	odorant binding protein OBP8 [Source:VB Community Annotation]	OBP8		GO:0005549	odorant binding
LOC5570317	725.52	0.639113	0.189437	3.37375	0.00074153	0.0118522	AAEL008247	DNA polymerase alpha catalytic subunit [Source:VB Community Annotation]			GO:0000166,GO:0001882,GO:0003676,GO:0003677,GO:0003887,GO:0005634,GO:0006260,GO:0016740,GO:0016779,GO:0046872,GO:0051536,GO:0051539,GO:0071897	nucleotide binding,nucleoside binding,nucleic acid binding,DNA binding,DNA-directed DNA polymerase activity,nucleus,DNA replication,transferase activity,nucleotidyltransferase activity,metal ion binding,iron-sulfur cluster binding,4 iron, 4 sulfur cluster binding,DNA biosynthetic process
LOC110675290	4.05484	-5.47114	1.6244	-3.36809	0.000756908	0.0120837	AAEL020356
LOC5570855	464.735	0.723934	0.21498	3.36745	0.000758656	0.0120873	AAEL008621	cdk1 [Source:VB Community Annotation]	cdc2		GO:0000166,GO:0004672,GO:0004674,GO:0005524,GO:0006468	nucleotide binding,protein kinase activity,protein serine/threonine kinase activity,ATP binding,protein phosphorylation
LOC23687671	2295.71	-0.42001	0.12473	-3.36736	0.000758926	0.0120873	AAEL017251		AGO2		GO:0003676,GO:0005515,GO:0031047	nucleic acid binding,protein binding,gene silencing by RNA
LOC5570807	232.282	0.587724	0.174593	3.36624	0.000762	0.012122	AAEL026522				GO:0003676,GO:0003723	nucleic acid binding,RNA binding
LOC5573324	279.66	0.67291	0.200122	3.3625	0.000772408	0.0122731	AAEL010422	replication-associated histone mRNA stem loop-binding protein, putative [Source:VB Community Annotation]			GO:0003723,GO:0003729	RNA binding,mRNA binding
LOC5569968	10506.6	-0.383157	0.113973	-3.36181	0.000774336	0.0122893	AAEL020092				GO:0005737,GO:0009968	cytoplasm,negative regulation of signal transduction
LOC5569838	71.6045	1.7261	0.513651	3.36045	0.000778142	0.0123352	AAEL007938	serine-type enodpeptidase, [Source:VB Community Annotation]			GO:0004252,GO:0006508	serine-type endopeptidase activity,proteolysis
LOC23687765	1449.99	0.857765	0.255313	3.35966	0.000780376	0.0123519	AAEL017345
LOC110675306	577.065	-0.903089	0.268822	-3.35943	0.000781024	0.0123519	AAEL023643				GO:0004252,GO:0006508	serine-type endopeptidase activity,proteolysis
LOC5579836	248.678	-0.687177	0.204629	-3.35817	0.000784612	0.0123941	AAEL005868				GO:0016020,GO:0016021	membrane,integral component of membrane
LOC5567637	2145.46	-0.684455	0.203847	-3.3577	0.000785944	0.0124007	AAEL006224	short-chain dehydrogenase [Source:VB Community Annotation]			GO:0016491,GO:0055114	oxidoreductase activity,oxidation-reduction process
LOC5572345	575.334	0.465285	0.138607	3.35685	0.000788354	0.0124242	AAEL023151				GO:0042254	ribosome biogenesis
LOC5568905	4.36518	-5.57743	1.66238	-3.35509	0.000793378	0.0124888	AAEL007198	Osiris, putative [Source:VB Community Annotation]			GO:0016020,GO:0016021	membrane,integral component of membrane
LOC5567398	17.1852	-1.57783	0.4705	-3.35353	0.000797886	0.0125451	AAEL006044	cytochrome P450 [Source:VB Community Annotation]	CYP325Q1		GO:0004497,GO:0005506,GO:0016491,GO:0016705,GO:0020037,GO:0046872,GO:0055114	monooxygenase activity,iron ion binding,oxidoreductase activity,oxidoreductase activity, acting on paired donors, with incorporation or reduction of molecular oxygen,heme binding,metal ion binding,oxidation-reduction process
LOC5567327	77.0655	-1.08846	0.324983	-3.34928	0.000810212	0.0127241	AAEL005992	adam (a disintegrin and metalloprotease) [Source:VB Community Annotation]			GO:0004222,GO:0006508,GO:0008237,GO:0016020,GO:0016021	metalloendopeptidase activity,proteolysis,metallopeptidase activity,membrane,integral component of membrane
LOC5574395	350.17	0.741158	0.221529	3.34565	0.000820903	0.0128756	AAEL011124	PHD finger protein [Source:VB Community Annotation]			GO:0046872	metal ion binding
LOC5567607	50.2847	-1.23815	0.370111	-3.34536	0.000821764	0.0128756	AAEL020644
LOC5574358	841.216	-0.439782	0.13149	-3.3446	0.000824013	0.0128958	AAEL002358				GO:0005515	protein binding
LOC5575285	2977.03	0.519234	0.155268	3.3441	0.000825485	0.0128992	AAEL011756	aldehyde dehydrogenase [Source:VB Community Annotation]			GO:0016491,GO:0016620,GO:0055114	oxidoreductase activity,oxidoreductase activity, acting on the aldehyde or oxo group of donors, NAD or NADP as acceptor,oxidation-reduction process
LOC5569051	27.8337	-2.50716	0.749774	-3.34389	0.000826136	0.0128992	AAEL019744				GO:0005216,GO:0006811,GO:0016020,GO:0016021,GO:0034220,GO:0055085	ion channel activity,ion transport,membrane,integral component of membrane,ion transmembrane transport,transmembrane transport
LOC5574870	5533.88	0.392105	0.117273	3.34353	0.0008272	0.0129009	AAEL011478	cytoplasmic dynein light chain [Source:VB Community Annotation]			GO:0003774,GO:0005737,GO:0005856,GO:0005874,GO:0005875,GO:0007017,GO:0030286	motor activity,cytoplasm,cytoskeleton,microtubule,microtubule associated complex,microtubule-based process,dynein complex
LOC110675613	1073.17	0.373079	0.11176	3.33821	0.000843215	0.0131355	AAEL021473				GO:0003677,GO:0005829	DNA binding,cytosol
LOC5575218	293.706	0.526757	0.157884	3.33634	0.000848883	0.0132085	AAEL011696				GO:0005515,GO:0005730,GO:0042273	protein binding,nucleolus,ribosomal large subunit biogenesis
LOC5576737	2007.64	-0.773548	0.23191	-3.33556	0.000851292	0.0132308	AAEL002978	leucyl aminopeptidase, putative [Source:VB Community Annotation]			GO:0004177,GO:0005737,GO:0006508,GO:0008233,GO:0008235,GO:0016787,GO:0019538,GO:0030145,GO:0070006	aminopeptidase activity,cytoplasm,proteolysis,peptidase activity,metalloexopeptidase activity,hydrolase activity,protein metabolic process,manganese ion binding,metalloaminopeptidase activity
LOC5566689	966.441	0.449158	0.134716	3.3341	0.000855754	0.0132848	AAEL005579	developmentally regulated GTP-binding protein 1 (drg 1) [Source:VB Community Annotation]			GO:0000166,GO:0005525	nucleotide binding,GTP binding
LOC5577045	167.21	0.614603	0.184599	3.3294	0.000870337	0.0134957	AAEL012962	DEAD box ATP-dependent RNA helicase [Source:VB Community Annotation]			GO:0000166,GO:0003676,GO:0003724,GO:0004386,GO:0005524,GO:0016787	nucleotide binding,nucleic acid binding,RNA helicase activity,helicase activity,ATP binding,hydrolase activity
LOC5573705	1058.09	0.604134	0.181635	3.32609	0.000880741	0.0136414	AAEL010691	ribonucleoside-diphosphate reductase small chain [Source:VB Community Annotation]			GO:0009263,GO:0016491,GO:0055114	deoxyribonucleotide biosynthetic process,oxidoreductase activity,oxidation-reduction process
LOC5570971	14.2926	-3.70592	1.11522	-3.32305	0.000890385	0.013775	AAEL008713
LOC5567211	241.421	0.56578	0.17031	3.32206	0.000893544	0.0137998	AAEL020101				GO:0003743,GO:0004672,GO:0005524,GO:0006413,GO:0006468	translation initiation factor activity,protein kinase activity,ATP binding,translational initiation,protein phosphorylation
LOC5579160	736.807	-0.387318	0.116595	-3.32191	0.000894035	0.0137998	AAEL003883				GO:0007165	signal transduction
LOC110679824	65.0744	1.23409	0.371643	3.32063	0.000898136	0.0138473	AAEL021929
LOC5574939	149.344	-1.06865	0.321888	-3.31995	0.000900345	0.0138655	AAEL011532
LOC5578010	588.567	-0.558857	0.16844	-3.31784	0.000907149	0.0139544	AAEL003365	fumarylacetoacetate hydrolase [Source:VB Community Annotation]			GO:0003824	catalytic activity
LOC110678498	1477.78	-0.841161	0.253584	-3.31709	0.000909618	0.0139737	AAEL022214	Putative gamma-interferon inducible lysosomal thiol reductase [Source:UniProtKB/TrEMBL;Acc:A0A0P6IX56]
LOC5575180	3.1764	5.11858	1.54322	3.31682	0.000910474	0.0139737	AAEL000335	lamin [Source:VB Community Annotation]			GO:0005198,GO:0005882	structural molecule activity,intermediate filament
LOC110680904	2170.16	-4.30181	1.29716	-3.31633	0.000912078	0.0139824	AAEL024580				GO:0016020,GO:0016021	membrane,integral component of membrane
LOC110678315	239.311	-2.06374	0.622374	-3.31591	0.000913445	0.0139875	AAEL025631
LOC110678276	56.5345	-1.11834	0.337317	-3.31541	0.000915104	0.0139971	AAEL022445				GO:0005198,GO:0016010,GO:0050808	structural molecule activity,dystrophin-associated glycoprotein complex,synapse organization
LOC5579205	413.148	-0.479267	0.144596	-3.31452	0.000917997	0.0140254	AAEL014045	allantoicase [Source:VB Community Annotation]			GO:0000256,GO:0004037,GO:0016787	allantoin catabolic process,allantoicase activity,hydrolase activity
LOC5576082	4576.58	0.545772	0.164681	3.31411	0.000919359	0.0140304	AAEL012312	proliferation-associated 2g4 (pa2g4/ebp1) [Source:VB Community Annotation]
LOC5576738	2170.33	-4.29944	1.29765	-3.31324	0.000922216	0.0140581	AAEL002962				GO:0016020,GO:0016021	membrane,integral component of membrane
LOC5580252	1028.12	0.689481	0.208134	3.31269	0.000924047	0.0140701	AAEL012546	DNA replication licensing factor MCM6 [Source:VB Community Annotation]			GO:0000166,GO:0003677,GO:0003678,GO:0004386,GO:0005524,GO:0005634,GO:0006260,GO:0006270,GO:0016787,GO:0032508,GO:0042555	nucleotide binding,DNA binding,DNA helicase activity,helicase activity,ATP binding,nucleus,DNA replication,DNA replication initiation,hydrolase activity,DNA duplex unwinding,MCM complex
LOC5574929	2740.65	0.416602	0.125786	3.312	0.000926309	0.0140837	AAEL011527	eukaryotic translation initiation factor [Source:VB Community Annotation]			GO:0003743,GO:0006412,GO:0006413	translation initiation factor activity,translation,translational initiation
LOC5572744	415.046	-0.935898	0.282596	-3.31179	0.000927027	0.0140837	AAEL021667				GO:0005509,GO:0005886,GO:0007155,GO:0007156,GO:0016020	calcium ion binding,plasma membrane,cell adhesion,homophilic cell adhesion via plasma membrane adhesion molecules,membrane
LOC5567131	715.466	0.473348	0.142977	3.31066	0.000930774	0.0141248	AAEL023516				GO:0001671,GO:0051087,GO:0051879	ATPase activator activity,chaperone binding,Hsp90 protein binding
LOC5569143	245.546	-0.80322	0.242655	-3.31013	0.000932512	0.0141353	AAEL007403				GO:0003779	actin binding
LOC5566371	428.3	-0.40595	0.122744	-3.3073	0.000941999	0.014263	AAEL005364	adaptin, alpha/gamma/epsilon [Source:VB Community Annotation]			GO:0005794,GO:0006886,GO:0015031,GO:0016020,GO:0016192,GO:0030117,GO:0030121,GO:0031410	Golgi apparatus,intracellular protein transport,protein transport,membrane,vesicle-mediated transport,membrane coat,AP-1 adaptor complex,cytoplasmic vesicle
LOC5568958	154.526	0.645159	0.195096	3.30688	0.000943405	0.0142683	AAEL019817
LOC5575315	85.9321	-1.30422	0.394552	-3.30558	0.000947791	0.0143186	AAEL024510
LOC5564891	203.402	0.594662	0.179989	3.30388	0.000953576	0.0143899	AAEL004482				GO:0006364	rRNA processing
LOC110674389	40.7122	-0.993341	0.300766	-3.30271	0.000957562	0.0144179	AAEL024518
LOC110681193	40.7122	-0.993341	0.300766	-3.30271	0.000957562	0.0144179	AAEL025359
LOC5575053	189.359	0.650667	0.197101	3.30119	0.000962769	0.014475	AAEL026265
LOC5578387	1172.72	0.364162	0.11032	3.30097	0.000963502	0.014475	AAEL011728				GO:0003824,GO:0004571,GO:0005509,GO:0005975,GO:0008152,GO:0016020,GO:0016021,GO:0016787,GO:0016798	catalytic activity,mannosyl-oligosaccharide 1,2-alpha-mannosidase activity,calcium ion binding,carbohydrate metabolic process,metabolic process,membrane,integral component of membrane,hydrolase activity,hydrolase activity, acting on glycosyl bonds
LOC110681201	179.314	0.62413	0.189384	3.29557	0.000982213	0.0147397	AAEL020314				GO:0032367	intracellular cholesterol transport
LOC5579213	157.933	0.593888	0.180534	3.28962	0.00100323	0.0150385	AAEL014051	nop14 [Source:VB Community Annotation]			GO:0005634,GO:0005730,GO:0032040,GO:0042254	nucleus,nucleolus,small-subunit processome,ribosome biogenesis
LOC5575632	655.367	0.454404	0.138224	3.28745	0.00101101	0.0151382	AAEL011960				GO:0005634	nucleus
LOC5579987	408.756	-0.733228	0.223077	-3.28688	0.00101303	0.0151516	AAEL001740	candidate tumor suppressor protein [Source:VB Community Annotation]			GO:0008299,GO:0016740	isoprenoid biosynthetic process,transferase activity
LOC5568353	707.993	-0.599838	0.182524	-3.28636	0.00101492	0.0151632	AAEL001071	glutathione S-transferase (GSTD5) [Source:VB Community Annotation]	GSTD5		GO:0005515	protein binding
LOC5577671	481.639	0.657034	0.19999	3.28533	0.00101863	0.0152017	AAEL013305	bifunctional dihydrofolate reductase-thymidylate synthase [Source:VB Community Annotation]			GO:0004799,GO:0006231,GO:0008168,GO:0009165,GO:0016740,GO:0032259	thymidylate synthase activity,dTMP biosynthetic process,methyltransferase activity,nucleotide biosynthetic process,transferase activity,methylation
LOC5575507	786.182	0.770929	0.234732	3.28429	0.00102241	0.0152413	AAEL020097
LOC5569978	2276.05	-0.628835	0.191528	-3.28326	0.00102615	0.0152803	AAEL008069	notch [Source:VB Community Annotation]			GO:0005509,GO:0005515,GO:0006508,GO:0008236,GO:0016020,GO:0016021	calcium ion binding,protein binding,proteolysis,serine-type peptidase activity,membrane,integral component of membrane
LOC5573190	655.304	-0.423866	0.129122	-3.28268	0.00102824	0.0152945	AAEL001959
LOC5566859	578.948	-0.991354	0.302045	-3.28214	0.00103021	0.015307	AAEL000822	kinesin-like protein KLP68D [Source:VB Community Annotation]			GO:0000166,GO:0003774,GO:0003777,GO:0005524,GO:0005874,GO:0007018,GO:0008017	nucleotide binding,motor activity,microtubule motor activity,ATP binding,microtubule,microtubule-based movement,microtubule binding
LOC5580222	780.764	-0.640526	0.19518	-3.28173	0.00103174	0.0153128	AAEL011920	serine-type enodpeptidase, [Source:VB Community Annotation]			GO:0004252,GO:0006508	serine-type endopeptidase activity,proteolysis
LOC5565111	3522.54	0.74401	0.226796	3.28052	0.00103617	0.0153617	AAEL004588				GO:0042302	structural constituent of cuticle
LOC5564157	680.433	0.457134	0.139379	3.2798	0.00103882	0.0153788	AAEL004142	Phagocyte signaling-impaired protein (N-terminal acetyltransferase B complex subunit NAA25 homolog)(N-terminal acetyltransferase B complex subunit MDM20 homolog) [Source:VB Community Annotation]	psidin		GO:0002376,GO:0003674,GO:0005515,GO:0005764,GO:0006911,GO:0006955,GO:0045087	immune system process,molecular_function,protein binding,lysosome,phagocytosis, engulfment,immune response,innate immune response
LOC5566454	144.845	-0.790028	0.240908	-3.27937	0.00104038	0.0153788	AAEL014176	cornichon [Source:VB Community Annotation]
LOC5564486	901.9	-3.61255	1.10163	-3.27928	0.00104074	0.0153788	AAEL004280	Osiris, putative [Source:VB Community Annotation]			GO:0016020,GO:0016021	membrane,integral component of membrane
LOC5564185	332.285	-0.4914	0.149866	-3.27893	0.00104203	0.015381	AAEL014335				GO:0007165	signal transduction
LOC5573276	432.181	0.54408	0.165962	3.27835	0.00104417	0.0153815	AAEL010377				GO:0005634,GO:0031144,GO:0071630	nucleus,proteasome localization,nuclear protein quality control by the ubiquitin-proteasome system
LOC5568744	334.561	0.617821	0.188458	3.2783	0.00104434	0.0153815	AAEL007090	4-nitrophenylphosphatase [Source:UniProtKB/TrEMBL;Acc:Q0IF21]			GO:0016787	hydrolase activity
LOC110677974	50921.3	-0.36938	0.112709	-3.27728	0.00104811	0.0154202	AAEL023525				GO:0005576,GO:0008061	extracellular region,chitin binding
LOC5576995	8.36109	-2.87803	0.87853	-3.27596	0.00105304	0.015476	AAEL003066	brain chitinase and chia [Source:VB Community Annotation]			GO:0004553,GO:0005576,GO:0005975,GO:0006030,GO:0008061,GO:0008152,GO:0016787,GO:0016798	hydrolase activity, hydrolyzing O-glycosyl compounds,extracellular region,carbohydrate metabolic process,chitin metabolic process,chitin binding,metabolic process,hydrolase activity,hydrolase activity, acting on glycosyl bonds
LOC110678337	31.0519	-1.65178	0.504285	-3.27549	0.00105478	0.0154846	AAEL021079
LOC5567635	547.594	0.540957	0.16522	3.27416	0.00105977	0.015541	AAEL006211				GO:0005515	protein binding
LOC5574133	117.174	0.669923	0.204632	3.2738	0.00106113	0.015544	AAEL010951	glutamate decarboxylase [Source:VB Community Annotation]			GO:0003824,GO:0016829,GO:0016831,GO:0019752,GO:0030170	catalytic activity,lyase activity,carboxy-lyase activity,carboxylic acid metabolic process,pyridoxal phosphate binding
LOC5567850	1072.02	0.639876	0.195527	3.27258	0.00106572	0.0155924	AAEL000999	DNA replication licensing factor MCM7 [Source:VB Community Annotation]			GO:0000166,GO:0003677,GO:0003678,GO:0004386,GO:0005524,GO:0005634,GO:0006260,GO:0006270,GO:0007049,GO:0016787,GO:0032508,GO:0042555	nucleotide binding,DNA binding,DNA helicase activity,helicase activity,ATP binding,nucleus,DNA replication,DNA replication initiation,cell cycle,hydrolase activity,DNA duplex unwinding,MCM complex
LOC110677652	143.537	-0.756545	0.231196	-3.27231	0.00106674	0.0155924	AAEL024341
LOC5574076	717.749	-0.38851	0.118761	-3.27137	0.00107028	0.0156273	AAEL018205				GO:0004725,GO:0005515,GO:0006470,GO:0035335	protein tyrosine phosphatase activity,protein binding,protein dephosphorylation,peptidyl-tyrosine dephosphorylation
LOC5570507	478.076	-0.477823	0.146178	-3.26878	0.00108013	0.015754	AAEL001397	ribonuclease [Source:VB Community Annotation]			GO:0000175,GO:0000291,GO:0000932,GO:0003723,GO:0004518,GO:0004527,GO:0004540,GO:0005737,GO:0016787,GO:0034427,GO:0046872,GO:0090305,GO:0090501,GO:0090503,GO:1990074	3'-5'-exoribonuclease activity,nuclear-transcribed mRNA catabolic process, exonucleolytic,P-body,RNA binding,nuclease activity,exonuclease activity,ribonuclease activity,cytoplasm,hydrolase activity,nuclear-transcribed mRNA catabolic process, exonucleolytic, 3'-5',metal ion binding,nucleic acid phosphodiester bond hydrolysis,RNA phosphodiester bond hydrolysis,RNA phosphodiester bond hydrolysis, e…
LOC110676190	9654.02	1.15605	0.353714	3.26833	0.00108184	0.0157619	AAEL025037
LOC5568634	92.1136	0.729218	0.223204	3.26704	0.00108678	0.0158004	AAEL006998				GO:0003677	DNA binding
LOC5571588	4790.85	-0.460233	0.140872	-3.26703	0.00108682	0.0158004	AAEL009178	Gram-Negative Binding Protein (GNBP) or Beta-1 3-Glucan Binding Protein (BGBP). [Source:VB Community Annotation]	GNBPB4		GO:0004553,GO:0005975	hydrolase activity, hydrolyzing O-glycosyl compounds,carbohydrate metabolic process
LOC5576675	1600.08	-1.37068	0.419618	-3.26648	0.00108892	0.015814	AAEL012703
LOC5569537	8367.88	-0.656078	0.200878	-3.26606	0.00109056	0.0158207	AAEL024821
LOC110678029	71.5366	1.00951	0.309248	3.2644	0.00109695	0.0158964	AAEL021557	poor Imd response upon knock-in [Source:VB Community Annotation]	pirk
LOC5567887	702.429	-0.70202	0.215074	-3.26408	0.00109821	0.0158976	AAEL006327	sulfotransferase (sult) [Source:VB Community Annotation]			GO:0008146	sulfotransferase activity
LOC5566856	22.5714	1.50058	0.459886	3.26294	0.00110263	0.0159445	AAEL000797	dimethylaniline monooxygenase [Source:VB Community Annotation]			GO:0004497,GO:0004499,GO:0016491,GO:0050660,GO:0050661,GO:0055114	monooxygenase activity,N,N-dimethylaniline monooxygenase activity,oxidoreductase activity,flavin adenine dinucleotide binding,NADP binding,oxidation-reduction process
LOC5572387	558.714	0.493937	0.151395	3.26258	0.00110403	0.0159477	AAEL009773	geminin, putative [Source:VB Community Annotation]			GO:0005634,GO:0006275	nucleus,regulation of DNA replication
LOC5564561	24.0048	-8.03359	2.46265	-3.26217	0.00110563	0.0159536	AAEL004323	Carboxy/choline esterase [Source:VB Community Annotation]	CCEJHE2O		GO:0016787,GO:0052689	hydrolase activity,carboxylic ester hydrolase activity
LOC5575113	233.784	0.521734	0.160022	3.26039	0.00111258	0.0160284	AAEL011651	L-caldesmon, putative [Source:UniProtKB/TrEMBL;Acc:A0A1S4FTY8]			GO:0003676,GO:0003723	nucleic acid binding,RNA binding
LOC5569455	167.971	-0.544611	0.167046	-3.26024	0.00111318	0.0160284	AAEL007644	GPCR Orphan/Putative Class A Family [Source:VB Community Annotation]	GPRNNA6		GO:0004930,GO:0007165,GO:0007186,GO:0016020,GO:0016021	G protein-coupled receptor activity,signal transduction,G protein-coupled receptor signaling pathway,membrane,integral component of membrane
LOC5572636	130.313	0.904181	0.277389	3.25961	0.00111566	0.0160375	AAEL020195				GO:0004180,GO:0004181,GO:0006508,GO:0008233,GO:0008237,GO:0008270,GO:0016787,GO:0046872	carboxypeptidase activity,metallocarboxypeptidase activity,proteolysis,peptidase activity,metallopeptidase activity,zinc ion binding,hydrolase activity,metal ion binding
LOC5574145	102.846	0.782812	0.240165	3.25947	0.00111619	0.0160375	AAEL010959	serine collagenase 1 precursor, putative [Source:VB Community Annotation]			GO:0004252,GO:0006508	serine-type endopeptidase activity,proteolysis
LOC110674251	29.3565	-1.41314	0.433638	-3.2588	0.00111886	0.0160588	AAEL025792
LOC5576572	1404.32	-0.472787	0.145128	-3.25772	0.00112312	0.0160973	AAEL025570				GO:0000166,GO:0003774,GO:0003779,GO:0005515,GO:0005524,GO:0016459	nucleotide binding,motor activity,actin binding,protein binding,ATP binding,myosin complex
LOC5566225	5505.31	-0.466923	0.143337	-3.25751	0.00112393	0.0160973	AAEL005259
LOC5567921	28.5965	-2.02069	0.620454	-3.25679	0.00112681	0.0161215	AAEL006382	trypsin-eta, putative [Source:VB Community Annotation]			GO:0004252,GO:0006508	serine-type endopeptidase activity,proteolysis
LOC5574328	1677.42	-0.357196	0.109692	-3.25636	0.0011285	0.0161286	AAEL019424				GO:0005515	protein binding
LOC5576528	574.367	-0.421244	0.12939	-3.25562	0.00113146	0.0161539	AAEL012583	tuberin [Source:VB Community Annotation]			GO:0005096,GO:0005634,GO:0043547,GO:0051056	GTPase activator activity,nucleus,positive regulation of GTPase activity,regulation of small GTPase mediated signal transduction
LOC5577591	525.224	-0.470688	0.144668	-3.25358	0.0011396	0.0162372	AAEL020476				GO:0005768,GO:0005770,GO:0016020,GO:0016021	endosome,late endosome,membrane,integral component of membrane
LOC5573038	4584.52	0.606386	0.186376	3.25356	0.0011397	0.0162372	AAEL025993				GO:0000166,GO:0003824,GO:0005737,GO:0016491,GO:0016627,GO:0017113,GO:0019483,GO:0046872,GO:0051536,GO:0051539,GO:0055114	nucleotide binding,catalytic activity,cytoplasm,oxidoreductase activity,oxidoreductase activity, acting on the CH-CH group of donors,dihydropyrimidine dehydrogenase (NADP+) activity,beta-alanine biosynthetic process,metal ion binding,iron-sulfur cluster binding,4 iron, 4 sulfur cluster binding,oxidation-reduction process
LOC110677635	2062.27	-0.755072	0.23216	-3.25238	0.00114442	0.0162848	AAEL023743
LOC5578130	26716.2	0.858944	0.264118	3.25212	0.00114546	0.0162848	AAEL013512	pupal cuticle protein, putative [Source:VB Community Annotation]			GO:0042302	structural constituent of cuticle
LOC5574026	614.627	0.84668	0.260409	3.25134	0.00114861	0.0163124	AAEL010867	serine protease [Source:VB Community Annotation]			GO:0004252,GO:0006508,GO:0008233,GO:0008236,GO:0016787	serine-type endopeptidase activity,proteolysis,peptidase activity,serine-type peptidase activity,hydrolase activity
LOC5575174	1093.9	0.584835	0.179905	3.2508	0.00115081	0.0163265	AAEL000311
LOC110681458	91.7887	0.71978	0.221461	3.25015	0.00115345	0.0163295	AAEL021420				GO:0003677	DNA binding
LOC5565854	1963.27	0.34002	0.104628	3.24979	0.0011549	0.0163295	AAEL005037	seryl-tRNA synthetase [Source:VB Community Annotation]			GO:0000166,GO:0004812,GO:0004828,GO:0005524,GO:0006412,GO:0006418,GO:0006434,GO:0016874	nucleotide binding,aminoacyl-tRNA ligase activity,serine-tRNA ligase activity,ATP binding,translation,tRNA aminoacylation for protein translation,seryl-tRNA aminoacylation,ligase activity
LOC5567781	1088.26	-0.585937	0.180306	-3.24968	0.00115534	0.0163295	AAEL000119	AMP dependent coa ligase [Source:VB Community Annotation]			GO:0003824	catalytic activity
LOC5564038	167.61	0.597007	0.18372	3.24956	0.00115585	0.0163295	AAEL004055				GO:0005515	protein binding
LOC5563577	338.493	-1.1818	0.364023	-3.24649	0.00116837	0.0164891	AAEL000044	ornithine decarboxylase [Source:VB Community Annotation]			GO:0003824,GO:0006596	catalytic activity,polyamine biosynthetic process
LOC5575309	716.183	-1.10911	0.34213	-3.24178	0.00118785	0.0167464	AAEL002619				GO:0005576,GO:0006030,GO:0008061	extracellular region,chitin metabolic process,chitin binding
LOC5569585	1809.3	0.374458	0.115717	3.23598	0.00121226	0.0170727	AAEL001281				GO:0005452,GO:0006811,GO:0006820,GO:0008509,GO:0015698,GO:0016020,GO:0016021,GO:0098656	inorganic anion exchanger activity,ion transport,anion transport,anion transmembrane transporter activity,inorganic anion transport,membrane,integral component of membrane,anion transmembrane transport
LOC5570978	1398.63	-0.528709	0.163457	-3.23455	0.00121835	0.0171406	AAEL008705
LOC5570636	253.336	0.529026	0.163588	3.23389	0.00122115	0.0171622	AAEL008443
LOC5580218	1076.2	-0.93842	0.290313	-3.23244	0.00122737	0.0172317	AAEL024686				GO:0004252,GO:0006508,GO:0008233,GO:0008236,GO:0016787	serine-type endopeptidase activity,proteolysis,peptidase activity,serine-type peptidase activity,hydrolase activity
LOC5564080	340.262	-1.25928	0.389669	-3.23165	0.00123077	0.0172556	AAEL019601				GO:0005515,GO:0016301,GO:0016310	protein binding,kinase activity,phosphorylation
LOC5576642	13577.6	-0.293424	0.0908025	-3.23145	0.00123163	0.0172556	AAEL012671				GO:0003700,GO:0006355	DNA-binding transcription factor activity,regulation of transcription, DNA-templated
LOC5566986	883.289	-0.473683	0.146644	-3.23016	0.00123719	0.0173155	AAEL005734	leucine-rich transmembrane protein [Source:VB Community Annotation]			GO:0005515,GO:0016020,GO:0016021	protein binding,membrane,integral component of membrane
LOC5576908	78.2111	0.927726	0.287239	3.22981	0.00123874	0.0173192	AAEL012853				GO:0016020,GO:0016021	membrane,integral component of membrane
LOC5564782	1040.24	0.389618	0.120696	3.22809	0.00124621	0.0174057	AAEL004427	Prefoldin subunit 3 [Source:UniProtKB/TrEMBL;Acc:Q17CV4]			GO:0006457,GO:0016272	protein folding,prefoldin complex
LOC5577962	28.4418	1.56734	0.485976	3.22513	0.00125913	0.017568	AAEL013442
LOC5568799	1298.39	-0.453288	0.140576	-3.2245	0.00126191	0.0175886	AAEL001159	ribonuclease t2 [Source:VB Community Annotation]			GO:0003723,GO:0033897,GO:0090502	RNA binding,ribonuclease T2 activity,RNA phosphodiester bond hydrolysis, endonucleolytic
LOC5578623	370.037	0.537364	0.166704	3.22347	0.00126649	0.0176343	AAEL003581	amidophosphoribosyltransferase [Source:VB Community Annotation]			GO:0004044,GO:0006164,GO:0006189,GO:0009113,GO:0009116,GO:0016740,GO:0016757,GO:0046872,GO:0051536	amidophosphoribosyltransferase activity,purine nucleotide biosynthetic process,'de novo' IMP biosynthetic process,purine nucleobase biosynthetic process,nucleoside metabolic process,transferase activity,transferase activity, transferring glycosyl groups,metal ion binding,iron-sulfur cluster binding
LOC5572723	366.163	-0.805893	0.250039	-3.22307	0.00126825	0.0176406	AAEL009991	myosin iii [Source:VB Community Annotation]			GO:0000166,GO:0003774,GO:0003779,GO:0004672,GO:0005515,GO:0005524,GO:0005856,GO:0006468,GO:0007601,GO:0016459,GO:0050896	nucleotide binding,motor activity,actin binding,protein kinase activity,protein binding,ATP binding,cytoskeleton,protein phosphorylation,visual perception,myosin complex,response to stimulus
LOC110678457	55.454	0.983333	0.30515	3.22246	0.00127095	0.0176599	AAEL019842				GO:0016788	hydrolase activity, acting on ester bonds
LOC5570689	973.993	-0.852305	0.264829	-3.21832	0.00128942	0.0178981	AAEL008502				GO:0003824,GO:0005975,GO:0008152,GO:0016020,GO:0016021,GO:0016798	catalytic activity,carbohydrate metabolic process,metabolic process,membrane,integral component of membrane,hydrolase activity, acting on glycosyl bonds
LOC5569240	424.735	-0.793687	0.24677	-3.2163	0.00129855	0.0179996	AAEL024535				GO:0005509,GO:0005886,GO:0007155,GO:0007156,GO:0016020,GO:0016021,GO:0098609	calcium ion binding,plasma membrane,cell adhesion,homophilic cell adhesion via plasma membrane adhesion molecules,membrane,integral component of membrane,cell-cell adhesion
LOC23687533	645.903	0.622107	0.193447	3.2159	0.00130036	0.0179996	AAEL017113	H/ACA ribonucleoprotein complex subunit [Source:UniProtKB/TrEMBL;Acc:A0A1S4G5R5]			GO:0001522,GO:0003723,GO:0005634,GO:0005730,GO:0006364,GO:0031429,GO:0042254	pseudouridine synthesis,RNA binding,nucleus,nucleolus,rRNA processing,box H/ACA snoRNP complex,ribosome biogenesis
LOC5578739	586.256	-2.82452	0.87832	-3.21582	0.00130072	0.0179996	AAEL003653	Serine Protease Inhibitor (serpin) homologue - unlikely to be inhibitory. [Source:VB Community Annotation]	SRPN12		GO:0004867,GO:0005615,GO:0010466,GO:0010951,GO:0030414	serine-type endopeptidase inhibitor activity,extracellular space,negative regulation of peptidase activity,negative regulation of endopeptidase activity,peptidase inhibitor activity
LOC5566733	615.333	-0.794935	0.247286	-3.21463	0.00130612	0.0180444	AAEL005604	trypsin-epsilon, putative [Source:VB Community Annotation]			GO:0004252,GO:0006508	serine-type endopeptidase activity,proteolysis
LOC5577555	117.592	-0.784476	0.244041	-3.21452	0.00130664	0.0180444	AAEL013267				GO:0016020,GO:0016021,GO:0016740,GO:0016757	membrane,integral component of membrane,transferase activity,transferase activity, transferring glycosyl groups
LOC110677186	1477.64	-0.462397	0.143864	-3.21413	0.00130839	0.0180502	AAEL022548				GO:0003824,GO:0004553,GO:0005975,GO:0030246	catalytic activity,hydrolase activity, hydrolyzing O-glycosyl compounds,carbohydrate metabolic process,carbohydrate binding
LOC5570947	386.743	-0.541966	0.168762	-3.21142	0.00132079	0.0182026	AAEL008679	Alpha-tubulin N-acetyltransferase [Source:UniProtKB/TrEMBL;Acc:A0A2K7P6B5]			GO:0005874,GO:0016740,GO:0016746,GO:0019799,GO:0048666,GO:0070507,GO:0071929	microtubule,transferase activity,transferase activity, transferring acyl groups,tubulin N-acetyltransferase activity,neuron development,regulation of microtubule cytoskeleton organization,alpha-tubulin acetylation
LOC5577771	1891.61	-0.529014	0.164754	-3.21093	0.00132306	0.0182153	AAEL003318	oligopeptide transporter [Source:VB Community Annotation]			GO:0006857,GO:0016020,GO:0016021,GO:0022857,GO:0055085	oligopeptide transport,membrane,integral component of membrane,transmembrane transporter activity,transmembrane transport
LOC5564422	14.6219	2.04625	0.63775	3.20855	0.00133406	0.018348	AAEL014432	fibrinogen and fibronectin [Source:VB Community Annotation]
LOC5574945	567.969	-1.63732	0.510666	-3.20624	0.00134481	0.0184597	AAEL011547	metalloproteinase, putative [Source:VB Community Annotation]			GO:0004222,GO:0006508,GO:0008233,GO:0008237,GO:0008270,GO:0016787,GO:0046872	metalloendopeptidase activity,proteolysis,peptidase activity,metallopeptidase activity,zinc ion binding,hydrolase activity,metal ion binding
LOC5565021	150.901	0.894677	0.279044	3.20622	0.00134491	0.0184597	AAEL014700	sugar transporter [Source:VB Community Annotation]			GO:0016020,GO:0016021,GO:0022857,GO:0055085	membrane,integral component of membrane,transmembrane transporter activity,transmembrane transport
LOC5569542	32.6394	1.12848	0.352019	3.20574	0.00134714	0.0184715	AAEL007716				GO:0005886,GO:0016020,GO:0016021,GO:0046983	plasma membrane,membrane,integral component of membrane,protein dimerization activity
LOC5572014	64.8324	-2.3784	0.742075	-3.20507	0.00135029	0.018496	AAEL000238	Clip-Domain Serine Protease family D. [Source:VB Community Annotation]	CLIPD9		GO:0004252,GO:0006508,GO:0008233,GO:0008236,GO:0016787	serine-type endopeptidase activity,proteolysis,peptidase activity,serine-type peptidase activity,hydrolase activity
LOC23687462	327.078	-0.600385	0.187351	-3.20459	0.00135254	0.0185081	AAEL017042
LOC5571852	588.784	0.710791	0.221853	3.20388	0.00135591	0.0185262	AAEL009339	activin receptor type I, putative [Source:VB Community Annotation]			GO:0000166,GO:0004672,GO:0004675,GO:0005524,GO:0006468,GO:0007178,GO:0016020,GO:0016021,GO:0016301,GO:0016310,GO:0016740	nucleotide binding,protein kinase activity,transmembrane receptor protein serine/threonine kinase activity,ATP binding,protein phosphorylation,transmembrane receptor protein serine/threonine kinase signaling pathway,membrane,integral component of membrane,kinase activity,phosphorylation,transferase activity
LOC5570359	139.708	0.851173	0.265682	3.20373	0.00135661	0.0185262	AAEL008279
LOC5576475	564.396	1.03221	0.322659	3.19906	0.00137875	0.0188095	AAEL002917
LOC110676518	21.5723	1.43564	0.448999	3.19743	0.0013866	0.0188975	AAEL027097
LOC5567922	272.599	-0.904233	0.283118	-3.19384	0.00140395	0.0191012	AAEL006376	trypsin, putative [Source:VB Community Annotation]			GO:0004252,GO:0006508	serine-type endopeptidase activity,proteolysis
LOC5566529	475.452	0.558252	0.174795	3.19375	0.00140438	0.0191012	AAEL015199	WD-repeat protein [Source:VB Community Annotation]			GO:0000398,GO:0000974,GO:0004842,GO:0005515,GO:0005654,GO:0005681,GO:0006281,GO:0006397,GO:0006974,GO:0008380,GO:0016567,GO:0016740,GO:0061630	mRNA splicing, via spliceosome,Prp19 complex,ubiquitin-protein transferase activity,protein binding,nucleoplasm,spliceosomal complex,DNA repair,mRNA processing,cellular response to DNA damage stimulus,RNA splicing,protein ubiquitination,transferase activity,ubiquitin protein ligase activity
LOC110674235	3.19632	5.12644	1.60557	3.19291	0.00140847	0.019129	AAEL021803
LOC5574217	179.709	0.595709	0.186582	3.19275	0.00140925	0.019129	AAEL010993	queuine tRNA-ribosyltransferase [Source:VB Community Annotation]			GO:0005737,GO:0006400,GO:0008033,GO:0008479,GO:0016740,GO:0016757,GO:0016763,GO:0046872,GO:0101030	cytoplasm,tRNA modification,tRNA processing,queuine tRNA-ribosyltransferase activity,transferase activity,transferase activity, transferring glycosyl groups,transferase activity, transferring pentosyl groups,metal ion binding,tRNA-guanine transglycosylation
LOC110676681	106.424	0.705545	0.221094	3.19116	0.00141703	0.0192152	AAEL025687
LOC110681498	2328	0.393421	0.123341	3.1897	0.00142422	0.0192934	AAEL023347				GO:0001732,GO:0002183,GO:0002191,GO:0003723,GO:0003743,GO:0005737,GO:0005852,GO:0006412,GO:0006413,GO:0016282,GO:0033290,GO:0098808	formation of cytoplasmic translation initiation complex,cytoplasmic translational initiation,cap-dependent translational initiation,RNA binding,translation initiation factor activity,cytoplasm,eukaryotic translation initiation factor 3 complex,translation,translational initiation,eukaryotic 43S preinitiation complex,eukaryotic 48S preinitiation complex,mRNA cap binding
LOC5569414	7059.11	-0.621358	0.194842	-3.18904	0.00142747	0.019318	AAEL019520				GO:0006030,GO:0008061	chitin metabolic process,chitin binding
LOC23687649	151.16	0.696397	0.218426	3.18825	0.00143137	0.0193473	AAEL017229				GO:0003676,GO:0006355	nucleic acid binding,regulation of transcription, DNA-templated
LOC5573766	147.861	-0.75036	0.235373	-3.18796	0.00143278	0.0193473	AAEL026994				GO:0000166,GO:0000288,GO:0000289,GO:0000932,GO:0003723,GO:0004672,GO:0005524,GO:0005737,GO:0006397,GO:0006468,GO:0010606,GO:0031251	nucleotide binding,nuclear-transcribed mRNA catabolic process, deadenylation-dependent decay,nuclear-transcribed mRNA poly(A) tail shortening,P-body,RNA binding,protein kinase activity,ATP binding,cytoplasm,mRNA processing,protein phosphorylation,positive regulation of cytoplasmic mRNA processing body assembly,PAN complex
LOC5576111	317.268	0.466168	0.146238	3.18773	0.00143393	0.0193473	AAEL002784	zinc finger protein [Source:VB Community Annotation]			GO:0008270,GO:0046872	zinc ion binding,metal ion binding
LOC5572249	5498.01	-0.54353	0.170555	-3.18683	0.00143842	0.0193858	AAEL009682	serine collagenase 1 precursor, putative [Source:VB Community Annotation]			GO:0004252,GO:0006508	serine-type endopeptidase activity,proteolysis
LOC110678608	407.761	0.515737	0.161847	3.18658	0.00143966	0.0193858	AAEL020116
LOC5563695	893.445	0.591041	0.185577	3.18488	0.00144815	0.0194808	AAEL000549	fibulin 1 and [Source:VB Community Annotation]			GO:0005509,GO:0005515,GO:0016504,GO:0030198,GO:0062023	calcium ion binding,protein binding,peptidase activator activity,extracellular matrix organization,collagen-containing extracellular matrix
LOC5579516	29.4022	1.20441	0.378291	3.18382	0.00145346	0.0194992	AAEL023329
LOC5579831	216.49	-0.542425	0.17037	-3.18381	0.00145351	0.0194992	AAEL005863				GO:0051726	regulation of cell cycle
LOC5569816	388.279	-1.10689	0.347694	-3.18352	0.00145494	0.0194992	AAEL001307	SEC14, putative [Source:VB Community Annotation]
LOC5575603	1723.06	-1.06155	0.333468	-3.18336	0.00145575	0.0194992	AAEL011936
LOC5576850	167.363	0.603806	0.189687	3.18317	0.00145674	0.0194992	AAEL021694				GO:0005765,GO:0016020,GO:0016021,GO:0016491,GO:0031902,GO:0046872	lysosomal membrane,membrane,integral component of membrane,oxidoreductase activity,late endosome membrane,metal ion binding
LOC5565589	8602.93	-0.344739	0.108336	-3.18212	0.00146204	0.0195508	AAEL004865	cyclin g [Source:VB Community Annotation]			GO:0051726	regulation of cell cycle
LOC5576765	3925.76	0.358453	0.112715	3.18017	0.00147191	0.0196633	AAEL012746	chaperonin [Source:VB Community Annotation]			GO:0000166,GO:0005524,GO:0005737,GO:0006457,GO:0051082	nucleotide binding,ATP binding,cytoplasm,protein folding,unfolded protein binding
LOC5576652	638.315	-0.681993	0.214575	-3.17835	0.00148117	0.0197675	AAEL012683
LOC5567813	715.253	0.396628	0.12483	3.17734	0.00148632	0.0198166	AAEL000984				GO:0005085,GO:0005096,GO:0005634,GO:0005737,GO:0043547,GO:2000431	guanyl-nucleotide exchange factor activity,GTPase activator activity,nucleus,cytoplasm,positive regulation of GTPase activity,regulation of cytokinesis, actomyosin contractile ring assembly
LOC5571978	220.71	0.639575	0.201546	3.17335	0.00150692	0.0200578	AAEL009465	replication factor c / DNA polymerase iii gamma-tau subunit [Source:VB Community Annotation]			GO:0000166,GO:0003677,GO:0005524,GO:0006260,GO:0016887	nucleotide binding,DNA binding,ATP binding,DNA replication,ATPase activity
LOC5570563	114.893	-0.612502	0.193029	-3.17311	0.00150817	0.0200578	AAEL008376				GO:0005515	protein binding
LOC5572494	118.281	-1.26083	0.397364	-3.17297	0.00150886	0.0200578	AAEL024717				GO:0004735,GO:0006561,GO:0008652,GO:0016491,GO:0055114,GO:0055129	pyrroline-5-carboxylate reductase activity,proline biosynthetic process,cellular amino acid biosynthetic process,oxidoreductase activity,oxidation-reduction process,L-proline biosynthetic process
LOC5574263	1680.59	0.786494	0.248002	3.17132	0.00151749	0.0201526	AAEL025248				GO:0042302	structural constituent of cuticle
LOC23687878	137.611	-1.00095	0.315749	-3.17009	0.00152392	0.0202181	AAEL017458				GO:0016020,GO:0016021,GO:0035461,GO:0051180,GO:0090482	membrane,integral component of membrane,vitamin transmembrane transport,vitamin transport,vitamin transmembrane transporter activity
LOC5571143	565.777	-0.651761	0.205651	-3.16925	0.00152832	0.0202567	AAEL008853	choline/ethanolamine kinase [Source:VB Community Annotation]
LOC5578105	222.945	-0.659857	0.208289	-3.16798	0.001535	0.0203252	AAEL003405				GO:0005515	protein binding
LOC5574609	1029.7	-0.395195	0.124798	-3.16668	0.00154192	0.0203969	AAEL008686				GO:0016301,GO:0016310,GO:0023052	kinase activity,phosphorylation,signaling
LOC5573715	234.83	0.670058	0.211753	3.16433	0.0015544	0.0205418	AAEL010694	5-formyltetrahydrofolate cyclo-ligase [Source:UniProtKB/TrEMBL;Acc:Q16S54]			GO:0000166,GO:0005524,GO:0030272,GO:0046872	nucleotide binding,ATP binding,5-formyltetrahydrofolate cyclo-ligase activity,metal ion binding
LOC110679200	50.668	1.09625	0.347212	3.15729	0.00159245	0.0210241	AAEL023353
LOC5572000	425.401	-0.43776	0.138798	-3.15394	0.00161082	0.0212389	AAEL009486	ectonucleotide pyrophosphatase/phosphodiesterase [Source:VB Community Annotation]			GO:0003824,GO:0016020,GO:0016021	catalytic activity,membrane,integral component of membrane
LOC5572308	3432.04	-0.445125	0.141142	-3.15375	0.00161187	0.0212389	AAEL009700	beta lactamase domain [Source:VB Community Annotation]
LOC5577920	318.119	-0.819405	0.259866	-3.15318	0.00161501	0.0212596	AAEL003331				GO:0005515	protein binding
LOC5578096	835.743	0.668886	0.212182	3.15241	0.00161926	0.0212948	AAEL003424	zinc carboxypeptidase [Source:VB Community Annotation]			GO:0004180,GO:0004181,GO:0006508,GO:0008233,GO:0008237,GO:0008270,GO:0016787,GO:0046872	carboxypeptidase activity,metallocarboxypeptidase activity,proteolysis,peptidase activity,metallopeptidase activity,zinc ion binding,hydrolase activity,metal ion binding
LOC5573065	4275.9	-0.49412	0.156814	-3.151	0.00162714	0.0213776	AAEL014511				GO:0003677,GO:0008270,GO:0046872	DNA binding,zinc ion binding,metal ion binding
LOC5572854	200.417	0.639774	0.2031	3.15004	0.00163248	0.0214269	AAEL010077	xpa-binding protein 1 (mbdin) [Source:VB Community Annotation]			GO:0000166,GO:0003924,GO:0005525,GO:0005634,GO:0005737,GO:0016787	nucleotide binding,GTPase activity,GTP binding,nucleus,cytoplasm,hydrolase activity
LOC5579509	5339.95	-1.08324	0.343961	-3.14931	0.00163657	0.0214597	AAEL015137	Niemann-Pick Type C-2, putative [Source:VB Community Annotation]
LOC5579192	590.594	0.494121	0.157054	3.14619	0.00165413	0.0216499	AAEL003889	Gram-Negative Binding Protein (GNBP) or Beta-1 3-Glucan Binding Protein (BGBP). [Source:VB Community Annotation]	GNBPB1		GO:0004553,GO:0005975	hydrolase activity, hydrolyzing O-glycosyl compounds,carbohydrate metabolic process
LOC5563791	208.385	0.894128	0.284196	3.14616	0.00165428	0.0216499	AAEL003944				GO:0005634	nucleus
LOC5574705	339.183	0.473114	0.150552	3.14253	0.00167497	0.0218698	AAEL011349	serine protease [Source:VB Community Annotation]			GO:0004252,GO:0006508	serine-type endopeptidase activity,proteolysis
LOC5574724	826.721	-0.425059	0.135277	-3.14214	0.00167716	0.0218698	AAEL011356	alcohol dehydrogenase [Source:VB Community Annotation]			GO:0005737,GO:0006693,GO:0016491,GO:0032440,GO:0036132,GO:0047522,GO:0055114	cytoplasm,prostaglandin metabolic process,oxidoreductase activity,2-alkenal reductase [NAD(P)+] activity,13-prostaglandin reductase activity,15-oxoprostaglandin 13-oxidase activity,oxidation-reduction process
LOC5566235	160.747	0.60754	0.193355	3.1421	0.00167741	0.0218698	AAEL005263	U3 small nucleolar ribonucleoprotein protein IMP3 (U3 snoRNP protein IMP3), putative [Source:VB Community Annotation]			GO:0003723,GO:0019843	RNA binding,rRNA binding
LOC5568239	1307.7	0.611743	0.194694	3.14207	0.00167756	0.0218698	AAEL006684	Putative oxidoreductase GLYR1 homolog (EC 1.-.-.-)(Glyoxylate reductase 1 homolog)(Nuclear protein NP60 homolog) [Source:VB Community Annotation]			GO:0016491,GO:0050661,GO:0051287,GO:0055114	oxidoreductase activity,NADP binding,NAD binding,oxidation-reduction process
LOC5576417	98.7101	-1.07888	0.343529	-3.14059	0.00168605	0.0219594	AAEL018241				GO:0000166,GO:0005515,GO:0005524,GO:0006605,GO:0006886,GO:0015031,GO:0016020,GO:0017038	nucleotide binding,protein binding,ATP binding,protein targeting,intracellular protein transport,protein transport,membrane,protein import
LOC5566500	68.4898	-0.950154	0.302928	-3.13657	0.00170939	0.0222418	AAEL026161
LOC5569924	414.063	-0.749827	0.23921	-3.13459	0.00172093	0.0223704	AAEL008024				GO:0016020,GO:0016021	membrane,integral component of membrane
LOC5575840	795.74	-0.434302	0.138564	-3.1343	0.00172265	0.0223712	AAEL012125	activin receptor type I, putative [Source:VB Community Annotation]			GO:0000166,GO:0004672,GO:0004675,GO:0005524,GO:0006468,GO:0007178,GO:0016020,GO:0016301,GO:0016310,GO:0016740	nucleotide binding,protein kinase activity,transmembrane receptor protein serine/threonine kinase activity,ATP binding,protein phosphorylation,transmembrane receptor protein serine/threonine kinase signaling pathway,membrane,kinase activity,phosphorylation,transferase activity
LOC5578135	24262	0.882793	0.281794	3.13276	0.00173169	0.0224671
LOC5570158	407.062	-0.71729	0.229056	-3.13151	0.00173912	0.0225356	AAEL008133	GTP-binding protein hflx [Source:VB Community Annotation]			GO:0000166,GO:0005525,GO:0046872	nucleotide binding,GTP binding,metal ion binding
LOC5565121	499.966	-0.482861	0.154219	-3.13101	0.00174209	0.0225356	AAEL014732				GO:0005515,GO:0006986,GO:0016020,GO:0016021	protein binding,response to unfolded protein,membrane,integral component of membrane
LOC110675318	8547.64	-0.45793	0.146258	-3.13096	0.00174234	0.0225356	AAEL021342	V-type proton ATPase subunit [Source:UniProtKB/TrEMBL;Acc:Q1HQS1]
LOC5566735	5211.01	-0.666369	0.212847	-3.13074	0.00174364	0.0225356	AAEL005594				GO:0004252,GO:0006508,GO:0008233,GO:0008236,GO:0016787	serine-type endopeptidase activity,proteolysis,peptidase activity,serine-type peptidase activity,hydrolase activity
LOC5563838	134.523	0.734481	0.234668	3.12987	0.00174881	0.0225807	AAEL014169	small nuclear ribonucleoprotein, core, putative [Source:VB Community Annotation]			GO:0003723,GO:0005634,GO:0005681,GO:0006397,GO:0008380	RNA binding,nucleus,spliceosomal complex,mRNA processing,RNA splicing
LOC5573751	763.412	-0.752059	0.240309	-3.12954	0.00175077	0.0225845	AAEL000294				GO:0016020,GO:0016021	membrane,integral component of membrane
LOC5576604	460.555	-0.97862	0.312746	-3.12912	0.00175332	0.0225957	AAEL002929	AMP dependent ligase [Source:VB Community Annotation]			GO:0003824	catalytic activity
LOC5563763	1294.8	-0.409373	0.130849	-3.12858	0.00175652	0.0226155	AAEL014252	sulfite reductase [Source:VB Community Annotation]			GO:0006790,GO:0008482,GO:0016491,GO:0030151,GO:0046872,GO:0055114	sulfur compound metabolic process,sulfite oxidase activity,oxidoreductase activity,molybdenum ion binding,metal ion binding,oxidation-reduction process
LOC5572876	1103.31	0.713723	0.228274	3.12661	0.00176835	0.022746	AAEL010094	cyclin b [Source:VB Community Annotation]			GO:0005634,GO:0042025	nucleus,host cell nucleus
LOC5578182	222.326	-1.14882	0.367481	-3.12619	0.00177086	0.0227567	AAEL013556	cytochrome P450 [Source:VB Community Annotation]	CYP4J15		GO:0004497,GO:0005506,GO:0005789,GO:0016020,GO:0016021,GO:0016491,GO:0016705,GO:0020037,GO:0031090,GO:0046872,GO:0055114	monooxygenase activity,iron ion binding,endoplasmic reticulum membrane,membrane,integral component of membrane,oxidoreductase activity,oxidoreductase activity, acting on paired donors, with incorporation or reduction of molecular oxygen,heme binding,organelle membrane,metal ion binding,oxidation-reduction process
LOC110675739	9.67275	2.68434	0.858746	3.12588	0.00177271	0.0227588	AAEL027775
LOC5566373	185.876	-0.559491	0.179003	-3.12559	0.00177446	0.0227596	AAEL005353	Sugar transporter SWEET [Source:UniProtKB/TrEMBL;Acc:Q17A97]			GO:0000139,GO:0005886,GO:0008643,GO:0016020,GO:0016021	Golgi membrane,plasma membrane,carbohydrate transport,membrane,integral component of membrane
LOC5576645	12.105	2.67357	0.855539	3.12501	0.00177796	0.0227827	AAEL012664	prolylcarboxypeptidase, putative [Source:VB Community Annotation]			GO:0006508,GO:0008236,GO:0016787	proteolysis,serine-type peptidase activity,hydrolase activity
LOC5571276	947.225	-0.443144	0.141823	-3.12463	0.00178031	0.0227827	AAEL001561				GO:0016020,GO:0016021	membrane,integral component of membrane
LOC5573570	1541	-0.604431	0.193451	-3.12446	0.00178132	0.0227827	AAEL002133	juvenile hormone-inducible protein, putative [Source:VB Community Annotation]
LOC5564242	721.857	0.440238	0.14093	3.12381	0.00178525	0.0228113	AAEL004188
LOC5574834	386.567	0.607264	0.194497	3.12223	0.00179485	0.0229124	AAEL011433	small nuclear ribonucleoprotein sm d3 [Source:VB Community Annotation]			GO:0000387,GO:0005634,GO:0005681,GO:0005685,GO:0005687,GO:0006396,GO:0006397,GO:0008380,GO:0034715,GO:0034719	spliceosomal snRNP assembly,nucleus,spliceosomal complex,U1 snRNP,U4 snRNP,RNA processing,mRNA processing,RNA splicing,pICln-Sm protein complex,SMN-Sm protein complex
LOC5579114	320.359	-0.696071	0.223	-3.12139	0.00179998	0.0229561	AAEL003831	fatty acid hydroxylase [Source:VB Community Annotation]			GO:0005506,GO:0005783,GO:0005789,GO:0006629,GO:0006631,GO:0006633,GO:0008610,GO:0016020,GO:0016021,GO:0016491,GO:0046872,GO:0055114,GO:0080132	iron ion binding,endoplasmic reticulum,endoplasmic reticulum membrane,lipid metabolic process,fatty acid metabolic process,fatty acid biosynthetic process,lipid biosynthetic process,membrane,integral component of membrane,oxidoreductase activity,metal ion binding,oxidation-reduction process,fatty acid alpha-hydroxylase activity
LOC5569076	2971.08	0.501943	0.160975	3.11815	0.00181991	0.0231884	AAEL001216	DEAD box ATP-dependent RNA helicase [Source:VB Community Annotation]			GO:0000166,GO:0003676,GO:0003724,GO:0004386,GO:0005524,GO:0016787	nucleotide binding,nucleic acid binding,RNA helicase activity,helicase activity,ATP binding,hydrolase activity
LOC5564107	460.399	-1.52936	0.490516	-3.11786	0.00182172	0.0231896	AAEL004092	deoxyribonuclease I, putative [Source:VB Community Annotation]			GO:0003676,GO:0016787,GO:0046872	nucleic acid binding,hydrolase activity,metal ion binding
LOC5575348	22.1555	-2.0498	0.658005	-3.11517	0.00183842	0.0233801	AAEL002598	odorant binding protein OBP15 [Source:VB Community Annotation]	OBP15		GO:0005549	odorant binding
LOC110679174	198.496	0.59608	0.191392	3.11444	0.00184295	0.0234157	AAEL025704				GO:0000469	cleavage involved in rRNA processing
LOC5573497	10745.7	-0.694566	0.223037	-3.11413	0.00184487	0.0234181	AAEL010532	alpha-amylase [Source:VB Community Annotation]			GO:0003824,GO:0005975,GO:0008152,GO:0016798	catalytic activity,carbohydrate metabolic process,metabolic process,hydrolase activity, acting on glycosyl bonds
LOC110677132	378.3	-1.86435	0.59877	-3.11364	0.00184796	0.0234353	AAEL026796
LOC5571922	439.82	-0.712991	0.22902	-3.11322	0.00185057	0.0234463	AAEL009406	n(4)-(beta-n-acetylglucosaminyl)-l-asparaginase [Source:VB Community Annotation]			GO:0016787	hydrolase activity
LOC5575395	899.662	-0.508654	0.163455	-3.11188	0.00185897	0.0235307	AAEL011803	prohibitin, putative [Source:VB Community Annotation]			GO:0005886,GO:0016020,GO:0016021	plasma membrane,membrane,integral component of membrane
LOC5566320	13.9635	-1.87043	0.601221	-3.11106	0.00186419	0.0235542	AAEL023443
LOC5576028	1536.64	0.55746	0.179188	3.11104	0.00186432	0.0235542	AAEL012266	cytochrome P450 [Source:VB Community Annotation]	CYP4C38		GO:0004497,GO:0005506,GO:0016020,GO:0016021,GO:0016491,GO:0016705,GO:0020037,GO:0046872,GO:0055114	monooxygenase activity,iron ion binding,membrane,integral component of membrane,oxidoreductase activity,oxidoreductase activity, acting on paired donors, with incorporation or reduction of molecular oxygen,heme binding,metal ion binding,oxidation-reduction process
LOC5572942	108.071	-0.845469	0.271809	-3.11052	0.00186758	0.0235733	AAEL010154	cytochrome P450 [Source:VB Community Annotation]	CYP4AR2		GO:0004497,GO:0005506,GO:0016491,GO:0016705,GO:0020037,GO:0046872,GO:0055114	monooxygenase activity,iron ion binding,oxidoreductase activity,oxidoreductase activity, acting on paired donors, with incorporation or reduction of molecular oxygen,heme binding,metal ion binding,oxidation-reduction process
LOC5575889	37.8196	-3.32325	1.06891	-3.109	0.00187723	0.0236731	AAEL002057				GO:0003676,GO:0005634,GO:0008270,GO:0046872	nucleic acid binding,nucleus,zinc ion binding,metal ion binding
LOC5573150	4146.91	0.562739	0.181068	3.1079	0.00188424	0.0237393	AAEL002029	protein serine/threonine kinase, putative [Source:VB Community Annotation]
LOC5563725	2251.75	0.483001	0.155468	3.10676	0.00189148	0.0238083	AAEL014078	serine protease inhibitor, serpin [Source:VB Community Annotation]			GO:0004867,GO:0005615,GO:0010466,GO:0010951,GO:0030414	serine-type endopeptidase inhibitor activity,extracellular space,negative regulation of peptidase activity,negative regulation of endopeptidase activity,peptidase inhibitor activity
LOC5580025	619.219	-0.359904	0.115919	-3.10478	0.00190424	0.0239466	AAEL026253				GO:0006914	autophagy
LOC5572631	6955.53	-0.438361	0.141222	-3.10406	0.00190884	0.0239821	AAEL001840	zinc carboxypeptidase [Source:VB Community Annotation]			GO:0004180,GO:0004181,GO:0006508,GO:0008233,GO:0008237,GO:0008270,GO:0016787,GO:0046872	carboxypeptidase activity,metallocarboxypeptidase activity,proteolysis,peptidase activity,metallopeptidase activity,zinc ion binding,hydrolase activity,metal ion binding
LOC5564410	651.061	-0.79481	0.256103	-3.10347	0.00191264	0.0239924	AAEL019686
LOC110674174	95.2614	-1.00242	0.323008	-3.10338	0.00191321	0.0239924	AAEL024982
LOC110675599	79.4969	-1.16296	0.374818	-3.10274	0.00191739	0.0240225	AAEL024870				GO:0016747	transferase activity, transferring acyl groups other than amino-acyl groups
LOC5571208	990.342	-0.451298	0.145584	-3.09991	0.00193577	0.0242303	AAEL008893	xaa-pro dipeptidase pepd/pepq(e.coli) [Source:VB Community Annotation]			GO:0004177,GO:0006508,GO:0016787,GO:0030145,GO:0046872,GO:0070006	aminopeptidase activity,proteolysis,hydrolase activity,manganese ion binding,metal ion binding,metalloaminopeptidase activity
LOC5574140	222.918	0.636479	0.205519	3.09693	0.00195535	0.0244441	AAEL010949				GO:0005634,GO:0005737,GO:0008168,GO:0016435,GO:0070476	nucleus,cytoplasm,methyltransferase activity,rRNA (guanine) methyltransferase activity,rRNA (guanine-N7)-methylation
LOC110677094	119.381	0.701517	0.226532	3.09676	0.00195647	0.0244441	AAEL023057				GO:0003676,GO:0005634,GO:0008270,GO:0046872	nucleic acid binding,nucleus,zinc ion binding,metal ion binding
LOC5580057	600.065	-0.389778	0.125927	-3.09526	0.00196638	0.0245352	AAEL002170	phosphatidylinositol-phosphatidylcholine transfer protein, putative [Source:VB Community Annotation]
LOC5578230	990.902	0.386271	0.1248	3.09511	0.00196739	0.0245352	AAEL018267				GO:0000166,GO:0005524,GO:0016020,GO:0016021,GO:0016887,GO:0042626,GO:0055085	nucleotide binding,ATP binding,membrane,integral component of membrane,ATPase activity,ATPase-coupled transmembrane transporter activity,transmembrane transport
LOC5573660	208.729	0.548475	0.177276	3.09391	0.00197539	0.0246122	AAEL019892				GO:0003677	DNA binding
LOC5565260	233.774	-0.845906	0.273518	-3.09269	0.00198351	0.0246728	AAEL025650				GO:0005886,GO:0006811,GO:0016020,GO:0016021	plasma membrane,ion transport,membrane,integral component of membrane
LOC5572651	3131.84	-0.797885	0.257996	-3.09263	0.00198391	0.0246728	AAEL001864	eukaryotic translation initiation factor 4E binding protein (4EBP) [Source:VB Community Annotation]			GO:0003743,GO:0006413,GO:0006417,GO:0008190,GO:0017148,GO:0045947	translation initiation factor activity,translational initiation,regulation of translation,eukaryotic initiation factor 4E binding,negative regulation of translation,negative regulation of translational initiation
LOC5571520	1605.21	-1.34953	0.436465	-3.09195	0.00198845	0.0247065	AAEL009108	protease m1 zinc metalloprotease [Source:VB Community Annotation]			GO:0004177,GO:0006508,GO:0008233,GO:0008237,GO:0008270,GO:0016787,GO:0046872	aminopeptidase activity,proteolysis,peptidase activity,metallopeptidase activity,zinc ion binding,hydrolase activity,metal ion binding
LOC5564498	6.40975	-5.12635	1.65874	-3.09051	0.00199812	0.0248039	AAEL004275	Osiris, putative [Source:UniProtKB/TrEMBL;Acc:A0A1S4F763]			GO:0016020,GO:0016021	membrane,integral component of membrane
LOC5565479	110.656	0.792767	0.256579	3.08976	0.0020032	0.0248213	AAEL026975
LOC5569108	110.656	0.792767	0.256579	3.08976	0.0020032	0.0248213	AAEL007381
LOC5573165	309.228	0.725761	0.234983	3.08857	0.00201124	0.0248981	AAEL002007	protein serine/threonine kinase, putative [Source:VB Community Annotation]
LOC5569614	134.101	1.92997	0.624994	3.08799	0.00201518	0.0249169	AAEL001263
LOC110676818	74.877	-0.816886	0.264553	-3.0878	0.00201645	0.0249169	AAEL010289	beta nu integrin subunit [Source:VB Community Annotation]
LOC110675453	149.373	-1.10937	0.359416	-3.0866	0.0020246	0.0249948	AAEL026690
LOC5575293	324.765	0.472205	0.152999	3.08632	0.00202649	0.0249952	AAEL022938	Membrane trafficking protein emp24/gp25/p24 family member [Source:UniProtKB/TrEMBL;Acc:Q1HQL7]			GO:0007275,GO:0016020,GO:0016021	multicellular organism development,membrane,integral component of membrane
LOC110675094	6.31902	3.11634	1.0099	3.08578	0.00203022	0.0250159	AAEL027725
LOC5574197	3170.78	-0.389477	0.126227	-3.08553	0.00203187	0.0250159	AAEL002296	trifunctional enzyme beta subunit (tp-beta) [Source:VB Community Annotation]			GO:0003824,GO:0016740,GO:0016746,GO:0016747	catalytic activity,transferase activity,transferase activity, transferring acyl groups,transferase activity, transferring acyl groups other than amino-acyl groups
LOC5571141	2484.52	-0.541952	0.175682	-3.08484	0.00203662	0.0250315	AAEL019603				GO:0004497,GO:0005506,GO:0016491,GO:0016705,GO:0020037,GO:0046872,GO:0055114	monooxygenase activity,iron ion binding,oxidoreductase activity,oxidoreductase activity, acting on paired donors, with incorporation or reduction of molecular oxygen,heme binding,metal ion binding,oxidation-reduction process
LOC5576219	147.893	0.606608	0.196644	3.08481	0.00203684	0.0250315	AAEL002843				GO:0000493,GO:0001522,GO:0003723,GO:0005634,GO:0005732,GO:0006364,GO:0042254	box H/ACA snoRNP assembly,pseudouridine synthesis,RNA binding,nucleus,small nucleolar ribonucleoprotein complex,rRNA processing,ribosome biogenesis
LOC110679821	10.8279	1.99876	0.648038	3.08433	0.00204008	0.0250485	AAEL025531
LOC5574709	475.47	-0.536107	0.173838	-3.08395	0.00204269	0.0250577	AAEL011348				GO:0009166,GO:0016787	nucleotide catabolic process,hydrolase activity
LOC5569556	448.41	0.567027	0.1841	3.08	0.00207002	0.02537	AAEL007760	mct-1 protein [Source:VB Community Annotation]			GO:0003723,GO:0005737	RNA binding,cytoplasm
LOC5565484	69.4952	-1.29688	0.421131	-3.07951	0.0020734	0.0253883	AAEL004814	potassium-dependent sodium-calcium exchanger, putative [Source:VB Community Annotation]			GO:0006816,GO:0015297,GO:0016020,GO:0016021,GO:0055085	calcium ion transport,antiporter activity,membrane,integral component of membrane,transmembrane transport
LOC5575034	21.3942	2.18744	0.710447	3.07897	0.0020772	0.0253974	AAEL011582				GO:0003723,GO:0005737,GO:0006417,GO:0008270,GO:0046872	RNA binding,cytoplasm,regulation of translation,zinc ion binding,metal ion binding
LOC5568201	79.9049	0.815402	0.264911	3.07803	0.00208377	0.0253974	AAEL006637	Ribosomal RNA-processing protein 8 [Source:UniProtKB/TrEMBL;Acc:A0A1S4FE94]			GO:0005634,GO:0005730,GO:0006364,GO:0008168,GO:0016740,GO:0032259	nucleus,nucleolus,rRNA processing,methyltransferase activity,transferase activity,methylation
LOC5576406	295.823	0.696751	0.226365	3.078	0.00208398	0.0253974	AAEL012499	Histone H2A [Source:UniProtKB/TrEMBL;Acc:Q16LW9]			GO:0000786,GO:0003677,GO:0005634,GO:0005694,GO:0046982	nucleosome,DNA binding,nucleus,chromosome,protein heterodimerization activity
LOC5571894	124.538	0.583238	0.189489	3.07795	0.00208427	0.0253974	AAEL009382	lysine-specific demethylase NO66 (EC 1.14.11.27)(Nucleolar protein 66) [Source:VB Community Annotation]			GO:0005506,GO:0005634,GO:0006325,GO:0016491,GO:0016706,GO:0032453,GO:0034720,GO:0045892,GO:0046872,GO:0051213,GO:0051864,GO:0055114,GO:0070544	iron ion binding,nucleus,chromatin organization,oxidoreductase activity,2-oxoglutarate-dependent dioxygenase activity,histone demethylase activity (H3-K4 specific),histone H3-K4 demethylation,negative regulation of transcription, DNA-templated,metal ion binding,dioxygenase activity,histone demethylase activity (H3-K36 specific),oxidation-reduction process,histone H3-K36 demethylation
LOC5572413	86.9553	-1.56507	0.508494	-3.07785	0.002085	0.0253974	AAEL009803	phaF protein, putative [Source:VB Community Annotation]			GO:0042302	structural constituent of cuticle
LOC5563609	194.273	0.974648	0.316671	3.07779	0.00208542	0.0253974	AAEL000087	macroglobulin/complement [Source:VB Community Annotation]			GO:0004866,GO:0005576,GO:0005615,GO:0010951	endopeptidase inhibitor activity,extracellular region,extracellular space,negative regulation of endopeptidase activity
LOC5570658	88.9296	0.757824	0.246258	3.07735	0.00208849	0.0254118	AAEL008463	DEAD box ATP-dependent RNA helicase [Source:VB Community Annotation]			GO:0000166,GO:0003676,GO:0003723,GO:0003724,GO:0004386,GO:0005524,GO:0016787	nucleotide binding,nucleic acid binding,RNA binding,RNA helicase activity,helicase activity,ATP binding,hydrolase activity
LOC110676223	233.29	0.540661	0.175744	3.07641	0.0020951	0.0254693	AAEL027472				GO:0000166,GO:0003676,GO:0003724,GO:0004386,GO:0005524,GO:0016787	nucleotide binding,nucleic acid binding,RNA helicase activity,helicase activity,ATP binding,hydrolase activity
LOC5578356	378.091	-0.428173	0.139194	-3.0761	0.00209729	0.025473	AAEL003519				GO:0003700,GO:0005634,GO:0005789,GO:0006355,GO:0030968,GO:0035497,GO:0045944	DNA-binding transcription factor activity,nucleus,endoplasmic reticulum membrane,regulation of transcription, DNA-templated,endoplasmic reticulum unfolded protein response,cAMP response element binding,positive regulation of transcription by RNA polymerase II
LOC5575343	2169.07	0.746679	0.24278	3.07553	0.00210128	0.0254906	AAEL002617	odorant binding protein OBP12 [Source:VB Community Annotation]	OBP12		GO:0005549	odorant binding
LOC5566044	111.382	-1.05821	0.344105	-3.07525	0.00210326	0.0254906	AAEL005130	zinc finger protein [Source:VB Community Annotation]			GO:0003676	nucleic acid binding
LOC5564542	8825.1	-0.368452	0.119821	-3.07501	0.00210495	0.0254906	AAEL004313	fk506-binding protein [Source:VB Community Annotation]			GO:0000413,GO:0003755,GO:0005509,GO:0016853	protein peptidyl-prolyl isomerization,peptidyl-prolyl cis-trans isomerase activity,calcium ion binding,isomerase activity
LOC5565537	492.193	-0.481292	0.156527	-3.07482	0.00210629	0.0254906	AAEL004853	glycerol kinase [Source:VB Community Annotation]			GO:0000166,GO:0004370,GO:0005524,GO:0005975,GO:0006071,GO:0006072,GO:0016301,GO:0016310,GO:0016740,GO:0016773,GO:0019563	nucleotide binding,glycerol kinase activity,ATP binding,carbohydrate metabolic process,glycerol metabolic process,glycerol-3-phosphate metabolic process,kinase activity,phosphorylation,transferase activity,phosphotransferase activity, alcohol group as acceptor,glycerol catabolic process
LOC5571791	187.351	0.526842	0.171384	3.07404	0.00211182	0.0255223	AAEL009308	WD-repeat protein [Source:VB Community Annotation]			GO:0005515,GO:0006364,GO:0032040	protein binding,rRNA processing,small-subunit processome
LOC5572201	219.143	0.57508	0.187091	3.0738	0.00211353	0.0255223	AAEL009603				GO:0005634,GO:0005737,GO:0005739,GO:0005759,GO:0008033,GO:0008168,GO:0009019,GO:0016740,GO:0030488,GO:0032259,GO:0052906	nucleus,cytoplasm,mitochondrion,mitochondrial matrix,tRNA processing,methyltransferase activity,tRNA (guanine-N1-)-methyltransferase activity,transferase activity,tRNA methylation,methylation,tRNA (guanine(37)-N(1))-methyltransferase activity
LOC5572378	1976.66	0.464996	0.151285	3.07365	0.00211458	0.0255223	AAEL009766	lipoamide acyltransferase component of branched-chain alpha-keto acid dehydrogenase [Source:VB Community Annotation]			GO:0016740,GO:0016746	transferase activity,transferase activity, transferring acyl groups
LOC5564744	831.703	-0.426048	0.138668	-3.07244	0.00212317	0.0256031	AAEL024186				GO:0003779,GO:0005543,GO:0005737,GO:0006897,GO:0030276	actin binding,phospholipid binding,cytoplasm,endocytosis,clathrin binding
LOC110676135	164.445	-1.93121	0.629079	-3.0699	0.00214128	0.0257985	AAEL023723				GO:0004252,GO:0006508	serine-type endopeptidase activity,proteolysis
LOC110679003	9.976	2.71334	0.884305	3.06834	0.00215254	0.0259111	AAEL002458	pupal cuticle protein, putative [Source:VB Community Annotation]			GO:0042302	structural constituent of cuticle
LOC5575780	178.597	0.864911	0.281987	3.0672	0.00216076	0.0259869	AAEL002713	fibrinogen and fibronectin [Source:VB Community Annotation]
LOC5571085	28.5392	-2.40381	0.783814	-3.06681	0.00216359	0.0259978	AAEL008820
LOC5575405	379.064	0.618081	0.201776	3.06321	0.00218979	0.0262495	AAEL011810				GO:0042754,GO:0045892	negative regulation of circadian rhythm,negative regulation of transcription, DNA-templated
LOC5568119	176.197	0.583395	0.190453	3.0632	0.00218982	0.0262495	AAEL006549				GO:0005515	protein binding
LOC5572060	16.4435	-1.63901	0.535079	-3.06313	0.00219037	0.0262495	AAEL001728				GO:0016020,GO:0016021	membrane,integral component of membrane
LOC5565366	1230.44	-0.521281	0.170228	-3.06226	0.00219671	0.0263021	AAEL004739	acyl-coa dehydrogenase [Source:VB Community Annotation]			GO:0003995,GO:0016491,GO:0016627,GO:0050660,GO:0055114	acyl-CoA dehydrogenase activity,oxidoreductase activity,oxidoreductase activity, acting on the CH-CH group of donors,flavin adenine dinucleotide binding,oxidation-reduction process
LOC5564195	1408.99	0.331705	0.108359	3.06117	0.00220478	0.0263753	AAEL014345				GO:0016020,GO:0016021,GO:0030867	membrane,integral component of membrane,rough endoplasmic reticulum membrane
LOC5571542	486.869	-0.952869	0.311553	-3.05845	0.00222484	0.0265778	AAEL009130	cytochrome P450 [Source:VB Community Annotation]	CYP6Z7		GO:0004497,GO:0005506,GO:0016491,GO:0016705,GO:0020037,GO:0046872,GO:0055114	monooxygenase activity,iron ion binding,oxidoreductase activity,oxidoreductase activity, acting on paired donors, with incorporation or reduction of molecular oxygen,heme binding,metal ion binding,oxidation-reduction process
LOC5564201	124.907	0.786354	0.257118	3.05834	0.00222564	0.0265778	AAEL014349	Clip-Domain Serine Protease family B. [Source:VB Community Annotation]	CLIPB15		GO:0004252,GO:0005576,GO:0006508,GO:0008233,GO:0008236,GO:0016787	serine-type endopeptidase activity,extracellular region,proteolysis,peptidase activity,serine-type peptidase activity,hydrolase activity
LOC5574619	400.444	-0.818952	0.26785	-3.0575	0.0022319	0.0266026	AAEL008693	Cation efflux protein/ zinc transporter [Source:UniProtKB/TrEMBL;Acc:A0A1S4FKH5]			GO:0006812,GO:0006829,GO:0008324,GO:0016020,GO:0016021,GO:0055085,GO:0098655	cation transport,zinc ion transport,cation transmembrane transporter activity,membrane,integral component of membrane,transmembrane transport,cation transmembrane transport
LOC5572581	506.478	0.610453	0.199669	3.05733	0.00223321	0.0266026	AAEL009914	small nuclear ribonucleoprotein sm d2 [Source:VB Community Annotation]			GO:0000387,GO:0005634,GO:0005685,GO:0006397,GO:0008380,GO:0030532	spliceosomal snRNP assembly,nucleus,U1 snRNP,mRNA processing,RNA splicing,small nuclear ribonucleoprotein complex
LOC5565203	207.016	-0.845945	0.276699	-3.05727	0.00223363	0.0266026	AAEL004665				GO:0007155,GO:0016020,GO:0016021,GO:0042246	cell adhesion,membrane,integral component of membrane,tissue regeneration
LOC5572364	111.101	-0.682248	0.223184	-3.05689	0.00223644	0.0266127	AAEL009749	Sodium-dependent phosphate transporter [Source:UniProtKB/TrEMBL;Acc:A0A1S4FN96]			GO:0016020,GO:0016021,GO:0022857,GO:0055085	membrane,integral component of membrane,transmembrane transporter activity,transmembrane transport
LOC5566110	1903.16	0.575228	0.18821	3.05631	0.00224081	0.0266412	AAEL005179
LOC5573015	3961.83	0.272008	0.0890212	3.05554	0.00224654	0.0266858	AAEL001916	eukaryotic translation initiation factor 4e [Source:VB Community Annotation]			GO:0003723,GO:0003743,GO:0005737,GO:0006412,GO:0006413	RNA binding,translation initiation factor activity,cytoplasm,translation,translational initiation
LOC5580010	1823.08	-0.441902	0.144969	-3.04824	0.00230184	0.0273187	AAEL009637	cathepsin b [Source:VB Community Annotation]			GO:0004197,GO:0006508,GO:0008233,GO:0008234,GO:0016787,GO:0050790	cysteine-type endopeptidase activity,proteolysis,peptidase activity,cysteine-type peptidase activity,hydrolase activity,regulation of catalytic activity
LOC5570457	295.432	-0.536	0.17598	-3.0458	0.00232066	0.0275178	AAEL022137				GO:0016747	transferase activity, transferring acyl groups other than amino-acyl groups
LOC5576726	444.003	-3.11285	1.02227	-3.04503	0.00232659	0.0275639	AAEL002972	brain chitinase and chia [Source:VB Community Annotation]			GO:0004553,GO:0005576,GO:0005975,GO:0006030,GO:0008061,GO:0008152,GO:0016787,GO:0016798	hydrolase activity, hydrolyzing O-glycosyl compounds,extracellular region,carbohydrate metabolic process,chitin metabolic process,chitin binding,metabolic process,hydrolase activity,hydrolase activity, acting on glycosyl bonds
LOC5571127	517.459	0.418557	0.137599	3.04187	0.00235115	0.0278305	AAEL019751				GO:0004623,GO:0005576,GO:0006629,GO:0006644,GO:0016042,GO:0016787,GO:0046872,GO:0050482,GO:0102567,GO:0102568	phospholipase A2 activity,extracellular region,lipid metabolic process,phospholipid metabolic process,lipid catabolic process,hydrolase activity,metal ion binding,arachidonic acid secretion,phospholipase A2 activity (consuming 1,2-dipalmitoylphosphatidylcholine),phospholipase A2 activity consuming 1,2-dioleoylphosphatidylethanolamine)
LOC5572414	61.2151	-2.18362	0.718121	-3.04075	0.00235993	0.02791	AAEL009788	cuticle protein, putative [Source:VB Community Annotation]			GO:0042302	structural constituent of cuticle
LOC5569391	313.667	0.499769	0.164435	3.03931	0.00237123	0.0279988	AAEL007573				GO:0005515	protein binding
LOC5576627	245.411	-1.33745	0.440059	-3.03926	0.00237158	0.0279988	AAEL012649				GO:0005576,GO:0006030,GO:0008061	extracellular region,chitin metabolic process,chitin binding
LOC110680910	88.4707	0.703556	0.231568	3.03822	0.00237979	0.0280712	AAEL028089				GO:0003677	DNA binding
LOC5571298	1306.02	-0.658408	0.216772	-3.03733	0.00238682	0.0281174	AAEL001548	glucosyl/glucuronosyl transferases [Source:VB Community Annotation]			GO:0008194,GO:0016020,GO:0016021,GO:0016740,GO:0016757,GO:0016758	UDP-glycosyltransferase activity,membrane,integral component of membrane,transferase activity,transferase activity, transferring glycosyl groups,transferase activity, transferring hexosyl groups
LOC5568615	23.1471	-2.25489	0.742423	-3.0372	0.00238787	0.0281174	AAEL006980	lipase [Source:VB Community Annotation]			GO:0004806,GO:0005576,GO:0052689	triglyceride lipase activity,extracellular region,carboxylic ester hydrolase activity
LOC5567972	1474.33	0.307966	0.101421	3.03651	0.00239332	0.0281569	AAEL006415	leucyl-tRNA synthetase [Source:VB Community Annotation]			GO:0000166,GO:0002161,GO:0004812,GO:0004823,GO:0005524,GO:0006412,GO:0006418,GO:0006429,GO:0016874,GO:0106074	nucleotide binding,aminoacyl-tRNA editing activity,aminoacyl-tRNA ligase activity,leucine-tRNA ligase activity,ATP binding,translation,tRNA aminoacylation for protein translation,leucyl-tRNA aminoacylation,ligase activity,aminoacyl-tRNA metabolism involved in translational fidelity
LOC5572011	1157.39	-0.357936	0.117933	-3.03507	0.0024048	0.0282674	AAEL021276				GO:0016020,GO:0016021	membrane,integral component of membrane
LOC5572603	148.541	0.714562	0.235502	3.03421	0.00241168	0.0283236	AAEL009927
LOC5574210	122.987	-0.655745	0.216305	-3.03157	0.00243283	0.0285472	AAEL002317	Insulin-like receptor Precursor (MIR)(EC 2.7.10.1) [Source:VB Community Annotation]	InR		GO:0000166,GO:0004672,GO:0004713,GO:0004714,GO:0005009,GO:0005515,GO:0005524,GO:0005887,GO:0006468,GO:0007169,GO:0008286,GO:0016020,GO:0016021,GO:0016301,GO:0016310,GO:0016740,GO:0018108,GO:0043548,GO:0043559,GO:0043560,GO:0046777,GO:0046872,GO:0071469	nucleotide binding,protein kinase activity,protein tyrosine kinase activity,transmembrane receptor protein tyrosine kinase activity,insulin-activated receptor activity,protein binding,ATP binding,integral component of plasma membrane,protein phosphorylation,transmembrane receptor protein tyrosine kinase signaling pathway,insulin receptor signaling pathway,membrane,integral component of membrane,k…
LOC5569383	79.7277	0.701303	0.231369	3.0311	0.00243661	0.0285667	AAEL021474	Protein arginine N-methyltransferase [Source:UniProtKB/TrEMBL;Acc:Q171P3]			GO:0006479,GO:0008168,GO:0016274,GO:0016740,GO:0018216,GO:0032259,GO:0035246	protein methylation,methyltransferase activity,protein-arginine N-methyltransferase activity,transferase activity,peptidyl-arginine methylation,methylation,peptidyl-arginine N-methylation
LOC5574574	267.679	0.566196	0.186863	3.03001	0.00244549	0.0286459	AAEL002413	sphingomyelin phosphodiesterase [Source:VB Community Annotation]			GO:0004767,GO:0005576,GO:0006685,GO:0008152,GO:0016787,GO:0016798,GO:0046872	sphingomyelin phosphodiesterase activity,extracellular region,sphingomyelin catabolic process,metabolic process,hydrolase activity,hydrolase activity, acting on glycosyl bonds,metal ion binding
LOC5567405	91.5594	0.678994	0.224188	3.02868	0.00245621	0.0287467	AAEL006063	U3 small nucleolar ribonucleoprotein protein imp4 [Source:VB Community Annotation]
LOC5569705	488.622	0.581574	0.192136	3.02689	0.00247081	0.0288844	AAEL007858	ran GTPase-activating protein [Source:VB Community Annotation]			GO:0005096,GO:0005515,GO:0007165,GO:0043547	GTPase activator activity,protein binding,signal transduction,positive regulation of GTPase activity
LOC5580230	688.853	-0.684358	0.226106	-3.02672	0.00247226	0.0288844	AAEL012206	microtubule-associated protein tau [Source:VB Community Annotation]			GO:0005737,GO:0005856,GO:0005874,GO:0008017,GO:0015631	cytoplasm,cytoskeleton,microtubule,microtubule binding,tubulin binding
LOC5567421	1555.88	0.298696	0.0987808	3.02383	0.00249601	0.0291289	AAEL006087				GO:0005515	protein binding
LOC5574116	882.102	0.742491	0.245562	3.02364	0.0024975	0.0291289	AAEL010917	organic anion transporter [Source:VB Community Annotation]			GO:0005215,GO:0005515,GO:0005886,GO:0006811,GO:0016020,GO:0016021,GO:0055085	transporter activity,protein binding,plasma membrane,ion transport,membrane,integral component of membrane,transmembrane transport
LOC110675558	57.1534	1.19281	0.394749	3.0217	0.00251361	0.0292915	AAEL028195
LOC5575715	8216.04	0.267415	0.0885293	3.02064	0.00252245	0.0293692	AAEL012026	translation initiation factor 5C [Source:VB Community Annotation]			GO:0003743,GO:0005515,GO:0006413	translation initiation factor activity,protein binding,translational initiation
LOC5577674	293.588	-0.539189	0.178582	-3.01929	0.0025337	0.0294747	AAEL018259				GO:0003677,GO:0003684,GO:0005634,GO:0006281,GO:0006289,GO:0006974	DNA binding,damaged DNA binding,nucleus,DNA repair,nucleotide-excision repair,cellular response to DNA damage stimulus
LOC5571602	44.7805	-1.82977	0.606206	-3.0184	0.00254114	0.0295338	AAEL009186				GO:0016020,GO:0016021	membrane,integral component of membrane
LOC5576677	2305.36	-1.14899	0.380692	-3.01816	0.00254315	0.0295338	AAEL025252
LOC5576511	526.583	0.758182	0.251294	3.01711	0.00255197	0.0296108	AAEL012563	lumbrokinase-3(1) precursor, putative [Source:VB Community Annotation]			GO:0004252,GO:0006508	serine-type endopeptidase activity,proteolysis
LOC5577423	2304.03	-0.389191	0.129158	-3.01329	0.00258434	0.0299606	AAEL003160
LOC110677067	6405.96	0.805307	0.267407	3.01155	0.00259922	0.0301072	AAEL024249
LOC5567126	1533.2	-0.378071	0.125602	-3.01007	0.00261187	0.0302278	AAEL005879	vinculin [Source:VB Community Annotation]			GO:0003779,GO:0005198,GO:0005737,GO:0005886,GO:0005912,GO:0007155,GO:0015629,GO:0016020,GO:0030054,GO:0051015	actin binding,structural molecule activity,cytoplasm,plasma membrane,adherens junction,cell adhesion,actin cytoskeleton,membrane,cell junction,actin filament binding
LOC23687936	45316.5	-0.275611	0.0915756	-3.00966	0.00261543	0.0302432	AAEL017516				GO:0003723,GO:0003735,GO:0005840,GO:0006412,GO:0019843	RNA binding,structural constituent of ribosome,ribosome,translation,rRNA binding
LOC5572380	202.911	-3.20515	1.06542	-3.00835	0.00262674	0.0303479	AAEL009762	cytochrome P450 [Source:VB Community Annotation]	CYP307A1		GO:0004497,GO:0005506,GO:0016491,GO:0016705,GO:0020037,GO:0046872,GO:0055114	monooxygenase activity,iron ion binding,oxidoreductase activity,oxidoreductase activity, acting on paired donors, with incorporation or reduction of molecular oxygen,heme binding,metal ion binding,oxidation-reduction process
LOC5572624	103.482	0.686084	0.228176	3.00682	0.00263996	0.0304746	AAEL009944				GO:0005730,GO:0006364,GO:0032040,GO:0042254	nucleolus,rRNA processing,small-subunit processome,ribosome biogenesis
LOC5567762	860.588	-0.792603	0.263657	-3.00619	0.00264542	0.0305115	AAEL000137				GO:0006812,GO:0015299,GO:0016020,GO:0016021,GO:0055085,GO:1902600	cation transport,solute:proton antiporter activity,membrane,integral component of membrane,transmembrane transport,proton transmembrane transport
LOC110677024	29.8409	-1.06729	0.355151	-3.00517	0.00265432	0.0305688	AAEL022837
LOC5578728	915.725	-0.503196	0.167451	-3.00503	0.00265554	0.0305688	AAEL013840				GO:0007165,GO:0008083,GO:0016020	signal transduction,growth factor activity,membrane
LOC5572794	547.743	-0.900281	0.29961	-3.00484	0.00265717	0.0305688	AAEL001902	glutamate decarboxylase [Source:VB Community Annotation]			GO:0003824,GO:0016829,GO:0016831,GO:0019752,GO:0030170	catalytic activity,lyase activity,carboxy-lyase activity,carboxylic acid metabolic process,pyridoxal phosphate binding
LOC5567586	1117.84	-0.495237	0.164833	-3.00447	0.00266043	0.0305803	AAEL006180	sodium-coupled cation-chloride cotransporter [Source:VB Community Annotation]	CCC1		GO:0006811,GO:0015293,GO:0015377,GO:0016020,GO:0016021,GO:0022857,GO:0055085,GO:1902476	ion transport,symporter activity,cation:chloride symporter activity,membrane,integral component of membrane,transmembrane transporter activity,transmembrane transport,chloride transmembrane transport
LOC5564541	1578.11	-0.606973	0.202082	-3.0036	0.00266809	0.0306422	AAEL004307	n-myc downstream regulated [Source:VB Community Annotation]
LOC5571137	735.066	0.395173	0.131607	3.00267	0.00267625	0.0307098	AAEL020307				GO:0000055,GO:0005634,GO:0005730,GO:0015031,GO:0030036,GO:0042254,GO:0042273	ribosomal large subunit export from nucleus,nucleus,nucleolus,protein transport,actin cytoskeleton organization,ribosome biogenesis,ribosomal large subunit biogenesis
LOC5564074	229.983	0.494066	0.164639	3.00091	0.00269175	0.0308614	AAEL004075	RNA binding motif protein [Source:VB Community Annotation]			GO:0003676,GO:0003723	nucleic acid binding,RNA binding
LOC5572192	328.432	0.457743	0.152576	3.0001	0.00269887	0.0309168	AAEL009608	28S ribosomal protein S16, mitochondrial [Source:VB Community Annotation]	mRpS16		GO:0003735,GO:0005840,GO:0006412	structural constituent of ribosome,ribosome,translation
LOC5564622	40.54	1.18297	0.394397	2.99944	0.00270479	0.0309584	AAEL014544	prophenoloxidase [Source:VB Community Annotation]	PPO6		GO:0004497,GO:0016491,GO:0046872,GO:0055114	monooxygenase activity,oxidoreductase activity,metal ion binding,oxidation-reduction process
LOC5566581	160.686	-0.648529	0.216276	-2.99861	0.0027121	0.0310028	AAEL019834				GO:0005515	protein binding
LOC5574637	978.492	-0.320535	0.106899	-2.99848	0.00271326	0.0310028	AAEL011271	programmed cell death 6-interacting protein [Source:VB Community Annotation]			GO:0005515	protein binding
LOC5565597	10.5047	-3.90884	1.30399	-2.9976	0.00272117	0.0310669	AAEL004885	oviductin [Source:VB Community Annotation]			GO:0004252,GO:0006508,GO:0008233,GO:0008236,GO:0016787	serine-type endopeptidase activity,proteolysis,peptidase activity,serine-type peptidase activity,hydrolase activity
LOC5574626	932.776	-0.483701	0.161459	-2.99581	0.00273715	0.0312229	AAEL011264	phosphatidylethanolamine-binding protein [Source:VB Community Annotation]
LOC5571786	112.792	-1.04277	0.348176	-2.99495	0.00274492	0.0312824	AAEL009314	adenylate cyclase [Source:VB Community Annotation]			GO:0016020,GO:0016021,GO:0022857,GO:0055085	membrane,integral component of membrane,transmembrane transporter activity,transmembrane transport
LOC5574144	207.301	0.680125	0.227108	2.99472	0.002747	0.0312824	AAEL010957	serine collagenase 1 precursor, putative [Source:VB Community Annotation]			GO:0004252,GO:0006508	serine-type endopeptidase activity,proteolysis
LOC5568184	363.111	-0.464531	0.155222	-2.9927	0.00276524	0.0314636	AAEL020303				GO:0000166,GO:0005524,GO:0016020,GO:0016021,GO:0016887,GO:0042626,GO:0055085	nucleotide binding,ATP binding,membrane,integral component of membrane,ATPase activity,ATPase-coupled transmembrane transporter activity,transmembrane transport
LOC5568346	952.156	-1.13995	0.38107	-2.99144	0.00277663	0.0315666	AAEL001054	glutathione S-transferase (GSTD4) [Source:VB Community Annotation]	GSTD4		GO:0005515,GO:0016740	protein binding,transferase activity
LOC5574385	1378.5	0.491016	0.164225	2.98989	0.00279075	0.0317004	AAEL011090	complement component [Source:VB Community Annotation]			GO:0005759	mitochondrial matrix
LOC110675865	9.6488	2.11955	0.709069	2.9892	0.0027971	0.0317459	AAEL027649
LOC5572195	2533.22	0.279478	0.0935377	2.98787	0.00280931	0.0318377	AAEL014715	Eukaryotic translation initiation factor 3 subunit L (eIF3l) [Source:VB Community Annotation]			GO:0001732,GO:0002183,GO:0003743,GO:0005515,GO:0005737,GO:0005852,GO:0006412,GO:0006413,GO:0016282,GO:0033290	formation of cytoplasmic translation initiation complex,cytoplasmic translational initiation,translation initiation factor activity,protein binding,cytoplasm,eukaryotic translation initiation factor 3 complex,translation,translational initiation,eukaryotic 43S preinitiation complex,eukaryotic 48S preinitiation complex
LOC5565795	802.461	0.667039	0.223259	2.98774	0.00281047	0.0318377	AAEL020823				GO:0004867,GO:0005615,GO:0010466,GO:0010951,GO:0030414	serine-type endopeptidase inhibitor activity,extracellular space,negative regulation of peptidase activity,negative regulation of endopeptidase activity,peptidase inhibitor activity
LOC5565716	303.413	-0.577248	0.193218	-2.98755	0.00281226	0.0318377	AAEL014958	galactokinase [Source:VB Community Annotation]			GO:0000166,GO:0004335,GO:0005524,GO:0005534,GO:0005737,GO:0006012,GO:0016301,GO:0016310,GO:0016740,GO:0016773,GO:0046835	nucleotide binding,galactokinase activity,ATP binding,galactose binding,cytoplasm,galactose metabolic process,kinase activity,phosphorylation,transferase activity,phosphotransferase activity, alcohol group as acceptor,carbohydrate phosphorylation
LOC5578200	52.5005	1.13764	0.381068	2.98539	0.00283213	0.0320264	AAEL003485	adhesion regulating molecule 1 (110 kda cell membrane glycoprotein) [Source:VB Community Annotation]			GO:0005634,GO:0005737	nucleus,cytoplasm
LOC110678327	18.5434	1.67814	0.562148	2.98523	0.00283367	0.0320264	AAEL025015
LOC5573295	2034.22	-1.27452	0.427188	-2.9835	0.00284973	0.032181	AAEL010382	aldehyde oxidase [Source:VB Community Annotation]			GO:0005506,GO:0005777,GO:0009055,GO:0016491,GO:0022900,GO:0046872,GO:0050660,GO:0051536,GO:0051537,GO:0055114,GO:0071949	iron ion binding,peroxisome,electron transfer activity,oxidoreductase activity,electron transport chain,metal ion binding,flavin adenine dinucleotide binding,iron-sulfur cluster binding,2 iron, 2 sulfur cluster binding,oxidation-reduction process,FAD binding
LOC5579999	395.514	0.558263	0.187185	2.98242	0.00285981	0.0322643	AAEL001737	Fatty acyl-CoA reductase [Source:UniProtKB/TrEMBL;Acc:A0A1S4EZM7]			GO:0006629,GO:0016020,GO:0016021,GO:0016491,GO:0055114,GO:0080019,GO:0102965	lipid metabolic process,membrane,integral component of membrane,oxidoreductase activity,oxidation-reduction process,fatty-acyl-CoA reductase (alcohol-forming) activity,alcohol-forming fatty acyl-CoA reductase activity
LOC5568345	148.559	0.5797	0.194387	2.9822	0.00286189	0.0322643	AAEL024207
LOC110676707	15.9745	1.78048	0.597313	2.98082	0.00287482	0.0323823	AAEL020691
LOC5574792	234.457	0.545071	0.182875	2.98057	0.00287715	0.0323823	AAEL002493	short-chain dehydrogenase [Source:VB Community Annotation]			GO:0055114	oxidation-reduction process
LOC5568166	1874.33	0.487006	0.16344	2.97972	0.00288511	0.0324449	AAEL006609	zinc finger protein [Source:VB Community Annotation]			GO:0003676	nucleic acid binding
LOC5572845	1171.4	0.335126	0.112488	2.97922	0.00288979	0.0324704	AAEL010057				GO:0005737,GO:0019901	cytoplasm,protein kinase binding
LOC5577906	197.803	0.710348	0.238496	2.97845	0.00289714	0.032526	AAEL003332				GO:0005634,GO:0005737	nucleus,cytoplasm
LOC5571484	2967.15	0.388905	0.130594	2.97796	0.00290171	0.0325502	AAEL001605	microtubule binding protein, putative [Source:VB Community Annotation]			GO:0005515	protein binding
LOC5579028	360.457	-0.520819	0.174989	-2.97629	0.00291758	0.0327011	AAEL013963	tumor necrosis factor induced protein [Source:VB Community Annotation]			GO:0042981	regulation of apoptotic process
LOC5566366	1023.3	0.493457	0.165846	2.97538	0.00292622	0.0327707	AAEL020311				GO:0003676,GO:0003723	nucleic acid binding,RNA binding
LOC5575868	651.629	-0.632139	0.212641	-2.9728	0.00295096	0.0330204	AAEL019874				GO:0005576	extracellular region
LOC110676200	51.6671	-1.21207	0.407852	-2.97183	0.00296034	0.033098	AAEL024240
LOC5573730	245.182	0.53941	0.181594	2.97043	0.00297388	0.0332218	AAEL019598				GO:0005515,GO:0005634,GO:0005730	protein binding,nucleus,nucleolus
LOC5580184	699.975	-0.410691	0.138279	-2.97002	0.00297778	0.033238	AAEL002550	polyA-binding protein interacting protein, putative [Source:VB Community Annotation]			GO:0000900,GO:0045947	translation repressor activity, mRNA regulatory element binding,negative regulation of translational initiation
LOC5570606	240.405	0.491122	0.165391	2.96945	0.0029833	0.0332721	AAEL008418	Pyrroline-5-carboxylate reductase [Source:UniProtKB/TrEMBL;Acc:Q1HRH9]			GO:0004735,GO:0006561,GO:0008652,GO:0016491,GO:0055114,GO:0055129	pyrroline-5-carboxylate reductase activity,proline biosynthetic process,cellular amino acid biosynthetic process,oxidoreductase activity,oxidation-reduction process,L-proline biosynthetic process
LOC5564602	169.001	0.509634	0.171745	2.96738	0.00300347	0.0334694	AAEL014522
LOC5577415	250.575	-0.651574	0.219604	-2.96704	0.0030068	0.0334786	AAEL003162	formin 1,2/cappuccino [Source:VB Community Annotation]			GO:0005884,GO:0008017,GO:0045010	actin filament,microtubule binding,actin nucleation
LOC5573001	1210.84	-0.412618	0.139079	-2.96679	0.00300925	0.0334786	AAEL001935	CTL-like protein 1 [Source:UniProtKB/Swiss-Prot;Acc:Q17JQ7]			GO:0016020,GO:0016021	membrane,integral component of membrane
LOC5576797	217.708	-0.923454	0.311345	-2.96602	0.00301683	0.0335352	AAEL012782				GO:0004252,GO:0006508	serine-type endopeptidase activity,proteolysis
LOC5572784	24.1396	1.25592	0.423541	2.96528	0.00302407	0.0335881	AAEL001899	juvenile hormone-inducible protein, putative [Source:VB Community Annotation]
LOC5569768	249.938	-1.66178	0.560475	-2.96495	0.00302734	0.0335967	AAEL007897	spaetzle-like cytokine [Source:VB Community Annotation]	SPZ4		GO:0016020,GO:0016021	membrane,integral component of membrane
LOC5566301	2472.25	-0.464094	0.156554	-2.96443	0.00303246	0.033626	AAEL005293	Galectin [Source:UniProtKB/TrEMBL;Acc:Q16ND5]	GALE8A		GO:0030246	carbohydrate binding
LOC5574342	467.169	0.485532	0.163906	2.96226	0.0030539	0.0338359	AAEL012793				GO:0005634	nucleus
LOC5572004	64.6506	-0.842335	0.284404	-2.96175	0.00305892	0.0338638	AAEL009477
LOC5580092	8.78044	2.51987	0.851035	2.96095	0.00306695	0.0339248	AAEL002177	serine-type enodpeptidase, [Source:VB Community Annotation]			GO:0004252,GO:0006508	serine-type endopeptidase activity,proteolysis
LOC110677817	35.1368	1.24974	0.422148	2.96043	0.00307207	0.0339537	AAEL025334				GO:0004866,GO:0005576,GO:0005615	endopeptidase inhibitor activity,extracellular region,extracellular space
LOC5575242	8561.24	0.292405	0.0988238	2.95885	0.00308786	0.0341003	AAEL011711	nascent polypeptide associated complex alpha subunit (nac alpha) [Source:VB Community Annotation]			GO:0005854	nascent polypeptide-associated complex
LOC5577422	196.314	0.581085	0.196474	2.95757	0.00310072	0.0342143	AAEL003174	translation initiation factor 1A, putative [Source:VB Community Annotation]			GO:0003723,GO:0003743,GO:0006412,GO:0006413	RNA binding,translation initiation factor activity,translation,translational initiation
LOC5578139	342.376	-0.774591	0.262171	-2.95453	0.00313148	0.0345256	AAEL013525	Timp-3, putative [Source:VB Community Annotation]			GO:0004857,GO:0005515,GO:0005576,GO:0008191,GO:0010466,GO:0010951,GO:0030414	enzyme inhibitor activity,protein binding,extracellular region,metalloendopeptidase inhibitor activity,negative regulation of peptidase activity,negative regulation of endopeptidase activity,peptidase inhibitor activity
LOC5568906	225.83	-3.91173	1.32453	-2.9533	0.00314393	0.0346345	AAEL007217				GO:0016020,GO:0016021	membrane,integral component of membrane
LOC5572423	73.0592	-0.78947	0.267367	-2.95275	0.00314953	0.0346621	AAEL027040				GO:0007155,GO:0007229,GO:0016020,GO:0016021	cell adhesion,integrin-mediated signaling pathway,membrane,integral component of membrane
LOC5570313	3810.46	-0.316841	0.107311	-2.95255	0.00315157	0.0346621	AAEL008248	Eukaryotic translation initiation factor 2A [Source:UniProtKB/TrEMBL;Acc:A0A1S4FJ71]			GO:0003743,GO:0005515,GO:0006412,GO:0006413,GO:0006417	translation initiation factor activity,protein binding,translation,translational initiation,regulation of translation
LOC5568763	175.052	0.662536	0.224488	2.95132	0.00316416	0.0347562	AAEL007121	tartan [Source:VB Community Annotation]			GO:0005515,GO:0016020,GO:0016021	protein binding,membrane,integral component of membrane
LOC5564098	236.577	0.740791	0.251012	2.95121	0.00316527	0.0347562	AAEL014314	DNA primase [Source:UniProtKB/TrEMBL;Acc:Q16GN9]			GO:0003896,GO:0003899,GO:0006260,GO:0006269,GO:0016740,GO:0016779,GO:0046872	DNA primase activity,DNA-directed 5'-3' RNA polymerase activity,DNA replication,DNA replication, synthesis of RNA primer,transferase activity,nucleotidyltransferase activity,metal ion binding
LOC110675576	45.3245	1.23646	0.419257	2.94916	0.00318642	0.03496	AAEL022079
LOC5572002	106.483	-1.09867	0.372646	-2.94829	0.00319534	0.0350012	AAEL027371				GO:0004252,GO:0005515,GO:0006508,GO:0016020,GO:0016021	serine-type endopeptidase activity,protein binding,proteolysis,membrane,integral component of membrane
LOC5564072	1383.55	-0.579552	0.196572	-2.94829	0.00319535	0.0350012	AAEL004067	mitochondrial benzodiazepine receptor, putative [Source:VB Community Annotation]			GO:0016020,GO:0016021	membrane,integral component of membrane
LOC5580056	1589.37	0.412068	0.139827	2.94698	0.00320889	0.035121	AAEL002174	dolichyl-diphosphooligosaccharide protein glycosyltransferase [Source:VB Community Annotation]			GO:0005783,GO:0005789,GO:0006486,GO:0016020,GO:0016021,GO:0016740,GO:0018279	endoplasmic reticulum,endoplasmic reticulum membrane,protein glycosylation,membrane,integral component of membrane,transferase activity,protein N-linked glycosylation via asparagine
LOC110676925	336.574	0.730682	0.24806	2.94558	0.00322346	0.0352165	AAEL023378				GO:0005549	odorant binding
LOC5576312	1012.78	0.600278	0.203789	2.94558	0.00322348	0.0352165	AAEL028013				GO:0003824,GO:0008483,GO:0030170	catalytic activity,transaminase activity,pyridoxal phosphate binding
LOC5573885	2872.34	0.42508	0.14433	2.9452	0.00322743	0.0352165	AAEL010798	ubiquitin-conjugating enzyme E2 g [Source:VB Community Annotation]			GO:0000166,GO:0005524,GO:0016740	nucleotide binding,ATP binding,transferase activity
LOC5564698	147.382	-3.75283	1.27425	-2.94514	0.00322805	0.0352165	AAEL014571	oviductin [Source:VB Community Annotation]			GO:0004252,GO:0006508	serine-type endopeptidase activity,proteolysis
LOC5573269	584.873	-0.482466	0.16384	-2.94474	0.0032323	0.0352285	AAEL019544				GO:0003824	catalytic activity
LOC23687820	582.302	0.510383	0.173332	2.94454	0.00323436	0.0352285	AAEL017400				GO:0000398,GO:0005634,GO:0005681,GO:0006397,GO:0008380,GO:0071011	mRNA splicing, via spliceosome,nucleus,spliceosomal complex,mRNA processing,RNA splicing,precatalytic spliceosome
LOC5578851	949.956	0.399392	0.135689	2.94344	0.00324592	0.0353259	AAEL022689				GO:0004843,GO:0006511,GO:0016579,GO:0036459	thiol-dependent ubiquitin-specific protease activity,ubiquitin-dependent protein catabolic process,protein deubiquitination,thiol-dependent ubiquitinyl hydrolase activity
LOC5569608	1415.65	0.518669	0.176276	2.94238	0.00325703	0.0354183	AAEL001271
LOC110677879	86.4352	-0.981481	0.333825	-2.9401	0.00328104	0.0356506	AAEL019899				GO:0005576,GO:0008061	extracellular region,chitin binding
LOC5574946	369.019	-0.862327	0.293388	-2.9392	0.00329061	0.0357259	AAEL011553	trypsin [Source:VB Community Annotation]			GO:0004252,GO:0006508,GO:0008233,GO:0008236,GO:0016787	serine-type endopeptidase activity,proteolysis,peptidase activity,serine-type peptidase activity,hydrolase activity
LOC5571079	398.344	0.438407	0.149214	2.93811	0.00330221	0.0357994	AAEL008800	mitochondrial ribosomal protein, S26, putative [Source:VB Community Annotation]	mRpS26		GO:0005739,GO:0005763,GO:0005840	mitochondrion,mitochondrial small ribosomal subunit,ribosome
LOC110680896	166.978	0.605926	0.206233	2.93806	0.00330268	0.0357994	AAEL025874
LOC110679082	106.535	1.12265	0.382485	2.93516	0.00333379	0.0361076	AAEL026999
LOC5567088	62.8253	0.989942	0.337366	2.93433	0.00334271	0.0361752	AAEL025983				GO:0005634,GO:0005737,GO:0005813,GO:0005856,GO:0030030,GO:0042995,GO:0060271	nucleus,cytoplasm,centrosome,cytoskeleton,cell projection organization,cell projection,cilium assembly
LOC5565281	206.06	0.646453	0.220401	2.93308	0.00335617	0.0362918	AAEL013640	lung carbonyl reductase [Source:VB Community Annotation]			GO:0016491,GO:0055114	oxidoreductase activity,oxidation-reduction process
LOC5571427	422.981	0.430767	0.146924	2.93191	0.00336879	0.0363991	AAEL009067	helicase [Source:VB Community Annotation]			GO:0000166,GO:0003676,GO:0003723,GO:0003724,GO:0005524,GO:0006401,GO:0016787	nucleotide binding,nucleic acid binding,RNA binding,RNA helicase activity,ATP binding,RNA catabolic process,hydrolase activity
LOC5574592	9505.94	-0.375011	0.127926	-2.93148	0.00337356	0.0364215	AAEL002411				GO:0005783,GO:0005789,GO:0005886,GO:0016020,GO:0016021,GO:0038023	endoplasmic reticulum,endoplasmic reticulum membrane,plasma membrane,membrane,integral component of membrane,signaling receptor activity
LOC5576378	87.7984	0.643789	0.219662	2.93082	0.00338074	0.0364698	AAEL012474				GO:0000981,GO:0003677,GO:0005634,GO:0006355,GO:0006357,GO:0021520,GO:0043565	DNA-binding transcription factor activity, RNA polymerase II-specific,DNA binding,nucleus,regulation of transcription, DNA-templated,regulation of transcription by RNA polymerase II,spinal cord motor neuron cell fate specification,sequence-specific DNA binding
LOC5566322	6433.23	0.775651	0.264816	2.92901	0.00340041	0.0366528	AAEL005289	ornithine aminotransferase [Source:VB Community Annotation]			GO:0003824,GO:0004587,GO:0008483,GO:0030170,GO:0050155,GO:0055129	catalytic activity,ornithine-oxo-acid transaminase activity,transaminase activity,pyridoxal phosphate binding,ornithine(lysine) transaminase activity,L-proline biosynthetic process
LOC5573315	102.113	-0.597763	0.20411	-2.92863	0.00340461	0.0366688	AAEL010427	autophagy related gene [Source:VB Community Annotation]	APG6		GO:0006897,GO:0006914,GO:0032465	endocytosis,autophagy,regulation of cytokinesis
LOC5571582	1275.63	-0.546123	0.186552	-2.92746	0.00341742	0.0367511	AAEL009171				GO:0003700,GO:0006355,GO:0006986	DNA-binding transcription factor activity,regulation of transcription, DNA-templated,response to unfolded protein
LOC5570890	142.008	-0.96567	0.329892	-2.92723	0.00341991	0.0367511	AAEL008663	aldo-keto reductase [Source:VB Community Annotation]
LOC5570259	6524.1	-0.921503	0.314808	-2.92719	0.00342041	0.0367511	AAEL008208	serine protease [Source:VB Community Annotation]			GO:0004252,GO:0006508,GO:0008233,GO:0008236,GO:0016787	serine-type endopeptidase activity,proteolysis,peptidase activity,serine-type peptidase activity,hydrolase activity
LOC5567627	11.0449	-1.9144	0.654445	-2.92522	0.00344214	0.0369551	AAEL027960				GO:0005515	protein binding
LOC5566477	425.277	-0.37546	0.128367	-2.9249	0.00344564	0.0369633	AAEL005410	erythroblast macrophage protein emp [Source:VB Community Annotation]			GO:0004842,GO:0005515,GO:0005737,GO:0016363,GO:0043249,GO:0045721,GO:0046872	ubiquitin-protein transferase activity,protein binding,cytoplasm,nuclear matrix,erythrocyte maturation,negative regulation of gluconeogenesis,metal ion binding
LOC5577429	303.43	0.470571	0.160947	2.92377	0.00345821	0.0370687	AAEL013176				GO:0005634	nucleus
LOC110677038	27.2355	-1.20254	0.411898	-2.91952	0.00350572	0.0375256	AAEL024275
LOC5564117	3704.2	0.440178	0.150774	2.91946	0.00350639	0.0375256	AAEL019408	2-Cys thioredoxin peroxidase [Source:UniProtKB/TrEMBL;Acc:Q8WSF6]			GO:0004601,GO:0005623,GO:0016209,GO:0016491,GO:0045454,GO:0051920,GO:0055114,GO:0098869	peroxidase activity,obsolete cell,antioxidant activity,oxidoreductase activity,cell redox homeostasis,peroxiredoxin activity,oxidation-reduction process,cellular oxidant detoxification
LOC110678076	222.689	0.894695	0.306616	2.91797	0.0035232	0.0376756	AAEL023164
LOC5565337	191.542	0.591612	0.202819	2.91694	0.00353484	0.0377702	AAEL014831	RNA polymerase II subunit Rpb10, putative [Source:VB Community Annotation]			GO:0003677,GO:0003899,GO:0006351,GO:0008270,GO:0046872	DNA binding,DNA-directed 5'-3' RNA polymerase activity,transcription, DNA-templated,zinc ion binding,metal ion binding
LOC5570111	674.431	-0.469766	0.161138	-2.91531	0.00355334	0.0379379	AAEL008097	trypsin-eta, putative [Source:VB Community Annotation]			GO:0004252,GO:0006508,GO:0008233,GO:0008236,GO:0016787	serine-type endopeptidase activity,proteolysis,peptidase activity,serine-type peptidase activity,hydrolase activity
LOC5575270	653.266	0.701132	0.240575	2.91439	0.00356381	0.0380196	AAEL011740				GO:0005515	protein binding
LOC5568224	193.68	0.509136	0.174747	2.91357	0.00357325	0.0380902	AAEL006654				GO:0005515	protein binding
LOC5568525	620.274	-0.491038	0.168558	-2.91317	0.00357781	0.0381088	AAEL024980				GO:0005515,GO:0007040	protein binding,lysosome organization
LOC5566918	24.2948	-1.30375	0.447576	-2.91291	0.00358073	0.0381098	AAEL024932
LOC110680820	82.8628	0.666355	0.228837	2.91192	0.00359211	0.0381793	AAEL021474	Protein arginine N-methyltransferase [Source:UniProtKB/TrEMBL;Acc:Q171P3]
LOC5570461	1251.7	-0.303169	0.104116	-2.91185	0.00359291	0.0381793	AAEL008356				GO:0016020,GO:0016021,GO:0022857,GO:0055085	membrane,integral component of membrane,transmembrane transporter activity,transmembrane transport
LOC5568457	325.118	0.408585	0.140583	2.90637	0.00365646	0.038824	AAEL006854	Niemann-Pick Type C-2, putative [Source:VB Community Annotation]			GO:0005576,GO:0005623,GO:0032367	extracellular region,obsolete cell,intracellular cholesterol transport
LOC5565159	1544.89	0.291287	0.10024	2.9059	0.00366203	0.0388526	AAEL004613	phenylalanyl-tRNA synthetase beta chain [Source:VB Community Annotation]			GO:0000166,GO:0000287,GO:0003723,GO:0004812,GO:0004826,GO:0005524,GO:0005737,GO:0006412,GO:0006432,GO:0016874	nucleotide binding,magnesium ion binding,RNA binding,aminoacyl-tRNA ligase activity,phenylalanine-tRNA ligase activity,ATP binding,cytoplasm,translation,phenylalanyl-tRNA aminoacylation,ligase activity
LOC5568128	572.503	-0.385834	0.132816	-2.90503	0.00367214	0.0389293	AAEL015411	glutamine-dependent NAD(+) synthetase [Source:VB Community Annotation]			GO:0000166,GO:0003952,GO:0004359,GO:0005524,GO:0005737,GO:0006807,GO:0009435,GO:0016874	nucleotide binding,NAD+ synthase (glutamine-hydrolyzing) activity,glutaminase activity,ATP binding,cytoplasm,nitrogen compound metabolic process,NAD biosynthetic process,ligase activity
LOC5574108	163.976	0.707727	0.243661	2.90456	0.00367769	0.0389575	AAEL002254				GO:0004252,GO:0006508	serine-type endopeptidase activity,proteolysis
LOC110678724	6.22177	-3.07417	1.05866	-2.90383	0.00368623	0.0390174	AAEL027291
LOC5578795	79.7624	0.763558	0.262978	2.9035	0.00369012	0.039028	AAEL003648				GO:0000076,GO:0005634,GO:0006974,GO:0007049,GO:0048478	DNA replication checkpoint,nucleus,cellular response to DNA damage stimulus,cell cycle,replication fork protection
LOC5564686	300.746	-0.44992	0.15498	-2.90309	0.00369502	0.0390492	AAEL004397				GO:0005216,GO:0005515,GO:0006811,GO:0016020,GO:0016021,GO:0034220,GO:0050896,GO:0055085	ion channel activity,protein binding,ion transport,membrane,integral component of membrane,ion transmembrane transport,response to stimulus,transmembrane transport
LOC5573687	13.2552	1.59353	0.548956	2.90283	0.00369805	0.0390507	AAEL013348	lethal(2)essential for life protein, l2efl [Source:VB Community Annotation]			GO:0046872	metal ion binding
LOC5577966	291.145	-0.751124	0.258823	-2.90208	0.00370697	0.0391143	AAEL013441	Toll-like receptor [Source:VB Community Annotation]	TOLL9A		GO:0002224,GO:0004888,GO:0005515,GO:0006955,GO:0007165,GO:0016020,GO:0016021	toll-like receptor signaling pathway,transmembrane signaling receptor activity,protein binding,immune response,signal transduction,membrane,integral component of membrane
LOC5570537	257.96	-0.429388	0.147986	-2.90155	0.00371322	0.0391497	AAEL001410	snf2 histone linker phd ring helicase [Source:VB Community Annotation]			GO:0000166,GO:0005524,GO:0005634,GO:0046872	nucleotide binding,ATP binding,nucleus,metal ion binding
LOC110675864	3.67171	4.30232	1.48324	2.90062	0.0037243	0.0392359	AAEL020278
LOC5575814	603.235	0.871436	0.300485	2.9001	0.00373045	0.03927	AAEL012086	leucine-rich immune protein (Long) [Source:VB Community Annotation]	LRIM1		GO:0005515	protein binding
LOC110680553	10627.3	-0.483393	0.166712	-2.89958	0.00373666	0.0393048	AAEL022056				GO:0005524,GO:0033180,GO:0046034,GO:1902600	ATP binding,proton-transporting V-type ATPase, V1 domain,ATP metabolic process,proton transmembrane transport
LOC5576491	95.7317	0.766199	0.264321	2.89875	0.00374658	0.0393537	AAEL002902				GO:0005634,GO:0046983	nucleus,protein dimerization activity
LOC5579841	53.1	-0.853865	0.294568	-2.8987	0.00374714	0.0393537	AAEL024941				GO:0016020,GO:0016021	membrane,integral component of membrane
LOC110674435	26.575	-1.09695	0.378524	-2.89798	0.00375572	0.0394132	AAEL024631				GO:0005634,GO:0008270	nucleus,zinc ion binding
LOC5570471	387.34	-0.670884	0.231619	-2.8965	0.00377355	0.0395696	AAEL007189	nocturnin [Source:VB Community Annotation]			GO:0004535,GO:0007623,GO:0090503	poly(A)-specific ribonuclease activity,circadian rhythm,RNA phosphodiester bond hydrolysis, exonucleolytic
LOC5578993	318.138	0.399516	0.137944	2.89623	0.00377677	0.0395726	AAEL003794	homeobox protein nk-2 [Source:VB Community Annotation]			GO:0000981,GO:0003677,GO:0005634,GO:0006355,GO:0006357,GO:0043565	DNA-binding transcription factor activity, RNA polymerase II-specific,DNA binding,nucleus,regulation of transcription, DNA-templated,regulation of transcription by RNA polymerase II,sequence-specific DNA binding
LOC110675821	46.1143	-0.89491	0.309019	-2.89597	0.00377989	0.0395746	AAEL020942				GO:0005524	ATP binding
LOC5571924	129.719	0.541896	0.187467	2.89061	0.00384491	0.0402241	AAEL009399				GO:0005515,GO:0031080	protein binding,nuclear pore outer ring
LOC110675806	14.9549	1.74424	0.603597	2.88974	0.00385565	0.0403053	AAEL026361				GO:0016788	hydrolase activity, acting on ester bonds
LOC5565099	10.5897	-2.25942	0.782095	-2.88893	0.00386554	0.0403774	AAEL004590
LOC5569234	275.331	-0.737982	0.25549	-2.8885	0.00387085	0.0403857	AAEL024337				GO:0016020,GO:0016021,GO:0022857,GO:0055085	membrane,integral component of membrane,transmembrane transporter activity,transmembrane transport
LOC110677841	7.02808	2.91472	1.00919	2.88817	0.00387489	0.0403857	AAEL023400				GO:0004623,GO:0006644,GO:0050482	phospholipase A2 activity,phospholipid metabolic process,arachidonic acid secretion
LOC5579926	274.988	-0.61967	0.214557	-2.88814	0.00387531	0.0403857	AAEL006795	cytochrome P450 [Source:VB Community Annotation]	CYP9J15		GO:0004497,GO:0005506,GO:0016491,GO:0016705,GO:0020037,GO:0046872,GO:0055114	monooxygenase activity,iron ion binding,oxidoreductase activity,oxidoreductase activity, acting on paired donors, with incorporation or reduction of molecular oxygen,heme binding,metal ion binding,oxidation-reduction process
LOC5571572	343.547	-0.526962	0.182492	-2.88758	0.00388214	0.0404043	AAEL022328				GO:0005515	protein binding
LOC5574636	439.253	-0.400027	0.138537	-2.88751	0.00388307	0.0404043	AAEL011273	uridine cytidine kinase i [Source:VB Community Annotation]	ucdk1		GO:0000166,GO:0004849,GO:0005524,GO:0009116,GO:0016301,GO:0016310,GO:0016740,GO:0044206,GO:0044211	nucleotide binding,uridine kinase activity,ATP binding,nucleoside metabolic process,kinase activity,phosphorylation,transferase activity,UMP salvage,CTP salvage
LOC5571283	133.392	0.84816	0.294011	2.88479	0.00391676	0.0406686	AAEL001575	Monocarboxylate transporter [Source:UniProtKB/TrEMBL;Acc:A0A1S4EZ55]			GO:0016020,GO:0016021,GO:0022857,GO:0055085	membrane,integral component of membrane,transmembrane transporter activity,transmembrane transport
LOC110676547	162.798	-0.584846	0.202743	-2.88466	0.00391834	0.0406686	AAEL026564	Galectin [Source:UniProtKB/TrEMBL;Acc:Q0IG26]
LOC5572250	93.3797	0.991047	0.34356	2.88464	0.00391857	0.0406686	AAEL009679	secretory Phospholipase A2, putative [Source:VB Community Annotation]			GO:0004623,GO:0005576,GO:0006629,GO:0006644,GO:0016042,GO:0016787,GO:0046872,GO:0050482,GO:0102567,GO:0102568	phospholipase A2 activity,extracellular region,lipid metabolic process,phospholipid metabolic process,lipid catabolic process,hydrolase activity,metal ion binding,arachidonic acid secretion,phospholipase A2 activity (consuming 1,2-dipalmitoylphosphatidylcholine),phospholipase A2 activity consuming 1,2-dioleoylphosphatidylethanolamine)
LOC5576661	107.117	-0.7796	0.270273	-2.88449	0.00392051	0.0406686	AAEL012687	juvenile hormone-inducible protein, putative [Source:VB Community Annotation]
LOC5573936	986.704	-0.588777	0.204196	-2.88338	0.0039343	0.0407802	AAEL002235				GO:0016020,GO:0016021	membrane,integral component of membrane
LOC5572105	297.768	0.437046	0.151633	2.88225	0.0039484	0.040895	AAEL019522				GO:0005634	nucleus
LOC5580223	150.957	-1.08327	0.375967	-2.88129	0.00396051	0.040989	AAEL011922	serine-type enodpeptidase, [Source:VB Community Annotation]			GO:0004252,GO:0006508	serine-type endopeptidase activity,proteolysis
LOC5567389	39.5728	0.915075	0.317693	2.88038	0.00397201	0.0410765	AAEL006052				GO:0003676,GO:0003677	nucleic acid binding,DNA binding
LOC5575777	709.285	0.456002	0.158329	2.88008	0.00397569	0.0410832	AAEL002701	mannosyltransferase [Source:VB Community Annotation]			GO:0016020	membrane
LOC5578801	1440.57	-0.30873	0.107213	-2.87959	0.00398196	0.0411143	AAEL003646				GO:0003700,GO:0006355	DNA-binding transcription factor activity,regulation of transcription, DNA-templated
LOC5577114	635.732	-0.320108	0.111173	-2.87936	0.00398479	0.0411143	AAEL021798				GO:0005086,GO:0015031,GO:0032012	ARF guanyl-nucleotide exchange factor activity,protein transport,regulation of ARF protein signal transduction
LOC23687980	706.384	-0.354474	0.123145	-2.8785	0.00399565	0.0411948	AAEL017560				GO:0005515	protein binding
LOC5571495	427.747	-0.3887	0.1351	-2.87714	0.004013	0.0413421	AAEL001607	galactose-1-phosphate uridylyltransferase [Source:VB Community Annotation]			GO:0005975,GO:0006012,GO:0008108,GO:0008270,GO:0016740,GO:0016779,GO:0033499,GO:0046872	carbohydrate metabolic process,galactose metabolic process,UDP-glucose:hexose-1-phosphate uridylyltransferase activity,zinc ion binding,transferase activity,nucleotidyltransferase activity,galactose catabolic process via UDP-galactose,metal ion binding
LOC5575279	182.342	-0.618776	0.21516	-2.87589	0.00402885	0.0414739	AAEL014896				GO:0002224,GO:0004888,GO:0005515,GO:0006955,GO:0007165,GO:0016020,GO:0016021	toll-like receptor signaling pathway,transmembrane signaling receptor activity,protein binding,immune response,signal transduction,membrane,integral component of membrane
LOC5571312	867.205	-0.401243	0.139608	-2.87406	0.00405233	0.0416838	AAEL019533				GO:0000166,GO:0000827,GO:0000829,GO:0000832,GO:0005524,GO:0005737,GO:0005829,GO:0016301,GO:0016310,GO:0016740,GO:0033857,GO:0052723,GO:0052724,GO:0102092	nucleotide binding,inositol-1,3,4,5,6-pentakisphosphate kinase activity,inositol heptakisphosphate kinase activity,inositol hexakisphosphate 5-kinase activity,ATP binding,cytoplasm,cytosol,kinase activity,phosphorylation,transferase activity,diphosphoinositol-pentakisphosphate kinase activity,inositol hexakisphosphate 1-kinase activity,inositol hexakisphosphate 3-kinase activity,5-diphosphoinosit…
LOC5572664	822.733	0.363811	0.126613	2.87342	0.00406059	0.041737	AAEL026104				GO:0005515,GO:0005634,GO:0005643,GO:0006913,GO:0017056	protein binding,nucleus,nuclear pore,nucleocytoplasmic transport,structural constituent of nuclear pore
LOC5570074	185.209	0.480349	0.167257	2.87192	0.00407985	0.041903	AAEL001344	pair-rule protein odd-paired [Source:VB Community Annotation]			GO:0003676,GO:0003677,GO:0005634,GO:0046872	nucleic acid binding,DNA binding,nucleus,metal ion binding
LOC5576735	27.5976	-1.70203	0.593067	-2.86988	0.0041063	0.0421426	AAEL018289				GO:0016020,GO:0016021	membrane,integral component of membrane
LOC110681515	82.952	-0.788853	0.274924	-2.86935	0.00411318	0.0421812	AAEL025040
LOC5567155	127.091	0.63862	0.222632	2.8685	0.00412418	0.0422546	AAEL005909	splicing factor SC35, putative [Source:VB Community Annotation]			GO:0003676,GO:0003723,GO:0005634,GO:0006397	nucleic acid binding,RNA binding,nucleus,mRNA processing
LOC5564022	117.872	0.667002	0.232549	2.86822	0.00412789	0.0422546	AAEL014287				GO:0003824,GO:0004132,GO:0006220,GO:0008270,GO:0016787,GO:0046872	catalytic activity,dCMP deaminase activity,pyrimidine nucleotide metabolic process,zinc ion binding,hydrolase activity,metal ion binding
LOC5569133	200.849	-0.761992	0.26568	-2.86808	0.00412972	0.0422546	AAEL019707				GO:0016020,GO:0016021	membrane,integral component of membrane
LOC23687587	93.6328	0.685531	0.239065	2.86755	0.00413668	0.0422937	AAEL017167	GPCR HE6-like Family [Source:VB Community Annotation]	GPRHE6		GO:0004888,GO:0004930,GO:0007166,GO:0007186,GO:0016020,GO:0016021	transmembrane signaling receptor activity,G protein-coupled receptor activity,cell surface receptor signaling pathway,G protein-coupled receptor signaling pathway,membrane,integral component of membrane
LOC5572530	75.3435	0.809894	0.28273	2.86455	0.00417605	0.042645	AAEL020112				GO:0016020,GO:0016021,GO:0022857,GO:0055085	membrane,integral component of membrane,transmembrane transporter activity,transmembrane transport
LOC5572169	81.1849	0.639996	0.223427	2.86445	0.00417735	0.042645	AAEL009579	NBP2b protein, putative [Source:VB Community Annotation]			GO:0005634,GO:0005730,GO:0006364,GO:0032040	nucleus,nucleolus,rRNA processing,small-subunit processome
LOC5568678	549.882	-0.599769	0.209465	-2.86334	0.00419199	0.0427621	AAEL007030	ceramidase [Source:VB Community Annotation]			GO:0006629,GO:0006665,GO:0016787,GO:0017040,GO:0046514,GO:0102121	lipid metabolic process,sphingolipid metabolic process,hydrolase activity,N-acylsphingosine amidohydrolase activity,ceramide catabolic process,ceramidase activity
LOC5576571	621.489	0.603071	0.210648	2.86293	0.00419743	0.0427852	AAEL012629	deoxyuridine 5'-triphosphate nucleotidohydrolase [Source:VB Community Annotation]			GO:0000287,GO:0004170,GO:0006226,GO:0009117,GO:0016787,GO:0046080,GO:0046081,GO:0046872	magnesium ion binding,dUTP diphosphatase activity,dUMP biosynthetic process,nucleotide metabolic process,hydrolase activity,dUTP metabolic process,dUTP catabolic process,metal ion binding
LOC5578684	1481.98	-0.516895	0.180715	-2.86028	0.00423264	0.0431116	AAEL003645	stearoyl-coa desaturase [Source:VB Community Annotation]			GO:0006629,GO:0006633,GO:0016020,GO:0016021,GO:0016491,GO:0016717,GO:0055114	lipid metabolic process,fatty acid biosynthetic process,membrane,integral component of membrane,oxidoreductase activity,oxidoreductase activity, acting on paired donors, with oxidation of a pair of donors resulting in the reduction of molecular oxygen to two molecules of water,oxidation-reduction process
LOC5572568	1329.94	1.35151	0.472623	2.85959	0.00424184	0.0431728	AAEL009886	sodium-coupled cation-chloride cotransporter [Source:VB Community Annotation]	CCC3		GO:0006811,GO:0015293,GO:0015377,GO:0016020,GO:0016021,GO:0022857,GO:0055085,GO:1902476	ion transport,symporter activity,cation:chloride symporter activity,membrane,integral component of membrane,transmembrane transporter activity,transmembrane transport,chloride transmembrane transport
LOC5571567	1328.5	-0.443386	0.155102	-2.85867	0.00425421	0.0432661	AAEL009154	glutathione synthetase [Source:VB Community Annotation]			GO:0000166,GO:0000287,GO:0004363,GO:0005524,GO:0006750,GO:0016874,GO:0042803,GO:0043295,GO:0046872	nucleotide binding,magnesium ion binding,glutathione synthase activity,ATP binding,glutathione biosynthetic process,ligase activity,protein homodimerization activity,glutathione binding,metal ion binding
LOC5577816	1028.72	0.545656	0.19091	2.85819	0.00426069	0.0432773	AAEL013390	serine/threonine protein kinase [Source:VB Community Annotation]			GO:0000166,GO:0004672,GO:0004674,GO:0005515,GO:0005524,GO:0005737,GO:0005814,GO:0005856,GO:0006468,GO:0007099,GO:0016301,GO:0016310,GO:0016740	nucleotide binding,protein kinase activity,protein serine/threonine kinase activity,protein binding,ATP binding,cytoplasm,centriole,cytoskeleton,protein phosphorylation,centriole replication,kinase activity,phosphorylation,transferase activity
LOC5573590	476.98	-0.395252	0.138291	-2.85811	0.00426172	0.0432773	AAEL019577				GO:0005515,GO:0016301,GO:0016310	protein binding,kinase activity,phosphorylation
LOC110681469	65.5899	-1.12904	0.395122	-2.85744	0.00427072	0.0433035	AAEL027797				GO:0000786,GO:0003677,GO:0005634,GO:0005694,GO:0006334,GO:0042025	nucleosome,DNA binding,nucleus,chromosome,nucleosome assembly,host cell nucleus
LOC5575530	65.5899	-1.12904	0.395122	-2.85744	0.00427072	0.0433035	AAEL011906	histone H1, putative [Source:VB Community Annotation]			GO:0000786,GO:0003677,GO:0005634,GO:0005694,GO:0006334,GO:0042025	nucleosome,DNA binding,nucleus,chromosome,nucleosome assembly,host cell nucleus
LOC110674163	1102.88	0.37836	0.132519	2.85515	0.00430171	0.043585	AAEL022901	Huntingtin-interacting protein HYPK (Fragment) [Source:UniProtKB/TrEMBL;Acc:Q1HRA7]
LOC5565074	832.312	-0.57345	0.200941	-2.85383	0.00431961	0.0437337	AAEL017128				GO:0003824,GO:0005975,GO:0008152,GO:0016798	catalytic activity,carbohydrate metabolic process,metabolic process,hydrolase activity, acting on glycosyl bonds
LOC5572334	71.2791	0.862825	0.302658	2.85082	0.00436063	0.04409	AAEL020362				GO:0004252,GO:0006508	serine-type endopeptidase activity,proteolysis
LOC110677048	13.1712	-1.57339	0.551917	-2.85077	0.00436134	0.04409	AAEL020768				GO:0003676	nucleic acid binding
LOC5566931	9406.72	0.628813	0.220619	2.85022	0.00436891	0.0440981	AAEL005687	protein serine/threonine kinase, putative [Source:VB Community Annotation]
LOC5569028	449.048	-0.381964	0.134013	-2.8502	0.00436916	0.0440981	AAEL007316				GO:0046872	metal ion binding
LOC5570646	22406.6	-1.33626	0.468863	-2.85	0.00437193	0.0440981	AAEL008451	alpha-amylase [Source:VB Community Annotation]			GO:0003824,GO:0004556,GO:0005975,GO:0008152,GO:0016787,GO:0016798,GO:0043169,GO:0046872,GO:0103025	catalytic activity,alpha-amylase activity,carbohydrate metabolic process,metabolic process,hydrolase activity,hydrolase activity, acting on glycosyl bonds,cation binding,metal ion binding,alpha-amylase activity (releasing maltohexaose)
LOC5569388	298.689	-1.72096	0.604119	-2.84871	0.00438963	0.0442436	AAEL007579				GO:0016020,GO:0016021	membrane,integral component of membrane
LOC5564063	819.802	0.467103	0.164028	2.8477	0.00440369	0.0443522	AAEL004068
LOC5573046	250.856	-0.666753	0.234197	-2.84697	0.00441371	0.0444199	AAEL010224	transcription factor GATA-4 (GATA binding factor-4) [Source:VB Community Annotation]			GO:0003700,GO:0005634,GO:0006355,GO:0006357,GO:0008270,GO:0043565,GO:0046872	DNA-binding transcription factor activity,nucleus,regulation of transcription, DNA-templated,regulation of transcription by RNA polymerase II,zinc ion binding,sequence-specific DNA binding,metal ion binding
LOC5577775	201.462	0.898808	0.315826	2.84589	0.00442869	0.0444989	AAEL003299
LOC23687711	87.4737	-1.38907	0.48813	-2.8457	0.00443141	0.0444989	AAEL023132				GO:0003676,GO:0004806,GO:0005576,GO:0006629,GO:0008270,GO:0008970,GO:0052689	nucleic acid binding,triglyceride lipase activity,extracellular region,lipid metabolic process,zinc ion binding,phospholipase A1 activity,carboxylic ester hydrolase activity
LOC5566939	173.996	-1.01478	0.356601	-2.8457	0.00443144	0.0444989	AAEL005700	cytochrome P450 [Source:VB Community Annotation]	CYP325X4		GO:0004497,GO:0005506,GO:0016020,GO:0016021,GO:0016491,GO:0016705,GO:0020037,GO:0046872,GO:0055114	monooxygenase activity,iron ion binding,membrane,integral component of membrane,oxidoreductase activity,oxidoreductase activity, acting on paired donors, with incorporation or reduction of molecular oxygen,heme binding,metal ion binding,oxidation-reduction process
LOC5576019	513.669	0.379214	0.133302	2.84478	0.00444417	0.0445936	AAEL012250	developmentally regulated GTP-binding protein 2 (drg 2) [Source:VB Community Annotation]			GO:0000166,GO:0005525	nucleotide binding,GTP binding
LOC110674718	939.013	-0.520251	0.182912	-2.84426	0.00445144	0.0446334	AAEL020230
LOC5564423	343.98	-2.58154	0.907747	-2.8439	0.00445654	0.0446514	AAEL014433				GO:0016020,GO:0016021	membrane,integral component of membrane
LOC110675735	28.0943	-1.01707	0.35779	-2.84264	0.00447415	0.0447614	AAEL023924
LOC110676701	28.0943	-1.01707	0.35779	-2.84264	0.00447415	0.0447614	AAEL025169
LOC5577605	5651.7	-1.00351	0.353308	-2.84034	0.00450657	0.0450174	AAEL003274				GO:0042302	structural constituent of cuticle
LOC110675403	99.5269	-0.702613	0.247397	-2.84003	0.00451096	0.0450174	AAEL026415				GO:0017121,GO:0017128	plasma membrane phospholipid scrambling,phospholipid scramblase activity
LOC5578114	934.169	1.02801	0.361977	2.83998	0.00451161	0.0450174	AAEL003443	threonine dehydrogenase [Source:VB Community Annotation]			GO:0003824,GO:0050662	catalytic activity,obsolete coenzyme binding
LOC5573216	237.981	0.451337	0.158928	2.83988	0.00451307	0.0450174	AAEL010321	porphobilinogen deaminase [Source:VB Community Annotation]			GO:0004418,GO:0006779,GO:0006782,GO:0016740,GO:0018160,GO:0033014	hydroxymethylbilane synthase activity,porphyrin-containing compound biosynthetic process,protoporphyrinogen IX biosynthetic process,transferase activity,peptidyl-pyrromethane cofactor linkage,tetrapyrrole biosynthetic process
LOC5571677	1899.47	-0.740305	0.260749	-2.83915	0.00452342	0.0450873	AAEL001656	sodium-dependent phosphate transporter [Source:VB Community Annotation]			GO:0016020,GO:0016021,GO:0022857,GO:0055085	membrane,integral component of membrane,transmembrane transporter activity,transmembrane transport
LOC5577643	6482.66	0.930123	0.327661	2.83867	0.00453015	0.0451211	AAEL003239	pupal cuticle protein, putative [Source:VB Community Annotation]			GO:0042302	structural constituent of cuticle
LOC5579056	113.651	-0.708688	0.249719	-2.83794	0.00454052	0.0451911	AAEL013996				GO:0003676,GO:0005634,GO:0008270,GO:0046872	nucleic acid binding,nucleus,zinc ion binding,metal ion binding
LOC5569706	497.544	-0.408103	0.143928	-2.83547	0.0045759	0.0455097	AAEL007848
LOC5565215	3111.9	-1.00194	0.353423	-2.83495	0.00458322	0.0455423	AAEL004661	Beta-hexosaminidase [Source:UniProtKB/TrEMBL;Acc:Q17C82]			GO:0004553,GO:0004563,GO:0005975,GO:0008152,GO:0016020,GO:0016021,GO:0016787,GO:0016798,GO:0102148	hydrolase activity, hydrolyzing O-glycosyl compounds,beta-N-acetylhexosaminidase activity,carbohydrate metabolic process,metabolic process,membrane,integral component of membrane,hydrolase activity,hydrolase activity, acting on glycosyl bonds,N-acetyl-beta-D-galactosaminidase activity
LOC5573252	298.227	0.489371	0.172632	2.83477	0.00458593	0.0455423	AAEL010339				GO:0003747,GO:0006415	translation release factor activity,translational termination
LOC5565107	54.788	0.74654	0.263394	2.83431	0.00459253	0.0455744	AAEL023691
LOC110676549	4.96602	3.18287	1.1231	2.83401	0.00459685	0.0455837	AAEL026715
LOC5576701	41.2932	0.970576	0.342551	2.83337	0.00460597	0.0456407	AAEL012720
LOC110679054	404.504	-0.779824	0.275298	-2.83266	0.00461625	0.0456755	AAEL023637
LOC5570374	404.504	-0.779824	0.275298	-2.83266	0.00461625	0.0456755	AAEL008283
LOC5574597	292.875	0.506648	0.178924	2.83163	0.00463107	0.0457447	AAEL002418	mitochondrial ribosomal protein, L27, putative [Source:VB Community Annotation]	mRpL27		GO:0003735,GO:0005840,GO:0006412	structural constituent of ribosome,ribosome,translation
LOC5576975	1094.26	0.301066	0.106327	2.83152	0.00463277	0.0457447	AAEL003071	tRNA pseudouridine synthase D [Source:VB Community Annotation]			GO:0001522,GO:0003723,GO:0009451,GO:0009982,GO:0016853	pseudouridine synthesis,RNA binding,RNA modification,pseudouridine synthase activity,isomerase activity
LOC5563863	125.417	1.00461	0.354799	2.83147	0.0046334	0.0457447	AAEL003983	adenylate cyclase [Source:VB Community Annotation]			GO:0016020,GO:0016021,GO:0022857,GO:0055085	membrane,integral component of membrane,transmembrane transporter activity,transmembrane transport
LOC110677777	10.4036	-2.23614	0.790012	-2.83051	0.00464742	0.0458496	AAEL018102				GO:0005549	odorant binding
LOC5563960	2322.12	0.350659	0.123915	2.82984	0.00465711	0.0459116	AAEL004010	splicing factor, putative [Source:VB Community Annotation]			GO:0003676,GO:0003723	nucleic acid binding,RNA binding
LOC5579978	454.509	-0.373612	0.132037	-2.8296	0.0046606	0.0459126	AAEL007731	Pep12p, putative [Source:VB Community Annotation]			GO:0016020,GO:0016021,GO:0016192	membrane,integral component of membrane,vesicle-mediated transport
LOC5570267	3255.93	-1.15446	0.408808	-2.82398	0.00474317	0.0466918	AAEL008199	serine collagenase 1 precursor, putative [Source:VB Community Annotation]			GO:0004252,GO:0006508	serine-type endopeptidase activity,proteolysis
LOC110680483	115.551	0.593887	0.210583	2.8202	0.00479931	0.0472101	AAEL023240	U3 small nucleolar ribonucleoprotein component [Source:UniProtKB/TrEMBL;Acc:Q1HQS9]
LOC5566344	234.445	0.553145	0.196185	2.8195	0.00480979	0.0472787	AAEL020936				GO:0004089,GO:0008270	carbonate dehydratase activity,zinc ion binding
LOC5564582	112.091	0.546288	0.193826	2.81845	0.00482561	0.0473998	AAEL004333	pax neighbour protein [Source:VB Community Annotation]			GO:0002098,GO:0005634,GO:0005737,GO:0008033,GO:0033588	tRNA wobble uridine modification,nucleus,cytoplasm,tRNA processing,Elongator holoenzyme complex
LOC5580067	276.271	-0.588389	0.20881	-2.81782	0.00483502	0.0474577	AAEL002176	inosine-uridine preferring nucleoside hydrolase [Source:VB Community Annotation]
LOC5572298	49.1914	0.887744	0.315106	2.81729	0.00484308	0.0475022	AAEL001781	origin recognition complex subunit [Source:VB Community Annotation]			GO:0000808,GO:0003677,GO:0005634,GO:0006260	origin recognition complex,DNA binding,nucleus,DNA replication
LOC5565136	47.8924	0.969477	0.344147	2.81704	0.00484684	0.0475046	AAEL004648				GO:0046983	protein dimerization activity
LOC5578856	170.085	-0.538733	0.191468	-2.8137	0.00489743	0.0479657	AAEL003713	leucine-rich transmembrane protein [Source:VB Community Annotation]			GO:0005515,GO:0016020,GO:0016021	protein binding,membrane,integral component of membrane
LOC5577573	455.03	-0.536726	0.190789	-2.81318	0.00490537	0.0480086	AAEL019862				GO:0005085,GO:0005515	guanyl-nucleotide exchange factor activity,protein binding
LOC5577568	5779.85	-0.323797	0.115121	-2.81267	0.00491327	0.0480262	AAEL013279	peptidyl-prolyl cis-trans isomerase (cyclophilin) [Source:VB Community Annotation]			GO:0000413,GO:0003755,GO:0006457,GO:0016853	protein peptidyl-prolyl isomerization,peptidyl-prolyl cis-trans isomerase activity,protein folding,isomerase activity
LOC5578854	256.547	0.480125	0.170709	2.81253	0.00491534	0.0480262	AAEL003730	mitochondrial ribosomal protein, S28, putative [Source:VB Community Annotation]	mRpS28
LOC5568216	179.837	0.526201	0.187102	2.81237	0.00491783	0.0480262	AAEL006640	DEAD box ATP-dependent RNA helicase [Source:VB Community Annotation]			GO:0000166,GO:0003676,GO:0003723,GO:0003724,GO:0004386,GO:0005524,GO:0016787	nucleotide binding,nucleic acid binding,RNA binding,RNA helicase activity,helicase activity,ATP binding,hydrolase activity
LOC5576251	1321.63	-0.329855	0.117333	-2.81127	0.00493464	0.0481555	AAEL012409	pantothenate kinase [Source:VB Community Annotation]			GO:0000166,GO:0004594,GO:0005524,GO:0015937,GO:0016310	nucleotide binding,pantothenate kinase activity,ATP binding,coenzyme A biosynthetic process,phosphorylation
LOC110676562	65.1085	-0.853029	0.303774	-2.8081	0.00498345	0.0485688	AAEL022126	Putaive glycoprotein hormone-alpha2 [Source:UniProtKB/TrEMBL;Acc:C6SUP2]			GO:0005576	extracellular region
LOC5577380	1140.76	-0.734959	0.261732	-2.80805	0.00498418	0.0485688	AAEL000415	AMP dependent coa ligase [Source:VB Community Annotation]			GO:0003824	catalytic activity
LOC5564812	432.731	-0.399968	0.142459	-2.8076	0.00499117	0.0486018	AAEL021353				GO:0000166,GO:0004672,GO:0004713,GO:0004715,GO:0005515,GO:0005524,GO:0005737,GO:0006468,GO:0016301,GO:0016310,GO:0016740,GO:0018108	nucleotide binding,protein kinase activity,protein tyrosine kinase activity,non-membrane spanning protein tyrosine kinase activity,protein binding,ATP binding,cytoplasm,protein phosphorylation,kinase activity,phosphorylation,transferase activity,peptidyl-tyrosine phosphorylation
LOC5564321	674.344	-0.607292	0.216582	-2.80398	0.00504753	0.0491153	AAEL000575	apyrase, putative [Source:VB Community Annotation]			GO:0000166,GO:0009166,GO:0016787	nucleotide binding,nucleotide catabolic process,hydrolase activity
LOC5570666	271.889	-0.442278	0.157763	-2.80343	0.00505625	0.0491646	AAEL008491				GO:0010506,GO:0035658	regulation of autophagy,Mon1-Ccz1 complex
LOC5565510	82.7793	-0.641999	0.229093	-2.80235	0.00507324	0.0492944	AAEL004820	zinc finger protein [Source:VB Community Annotation]			GO:0003676,GO:0005634,GO:0008270	nucleic acid binding,nucleus,zinc ion binding
LOC5579952	237.884	0.534837	0.191	2.8002	0.00510711	0.0495878	AAEL006788	replication factor C, 37-kDa subunit, putative [Source:VB Community Annotation]			GO:0000166,GO:0003677,GO:0005524,GO:0006260,GO:0016887	nucleotide binding,DNA binding,ATP binding,DNA replication,ATPase activity
LOC5576349	978.262	0.418777	0.149592	2.79946	0.00511887	0.0496663	AAEL002867	phenylalanyl-tRNA synthetase alpha chain [Source:VB Community Annotation]			GO:0000049,GO:0000166,GO:0004812,GO:0004826,GO:0005524,GO:0005737,GO:0006412,GO:0006432,GO:0016874,GO:0043039	tRNA binding,nucleotide binding,aminoacyl-tRNA ligase activity,phenylalanine-tRNA ligase activity,ATP binding,cytoplasm,translation,phenylalanyl-tRNA aminoacylation,ligase activity,tRNA aminoacylation
LOC110681378	164.638	0.535381	0.191295	2.79873	0.00513045	0.0497429	AAEL027396				GO:0005634,GO:0005730,GO:0032040,GO:0042254	nucleus,nucleolus,small-subunit processome,ribosome biogenesis
LOC5575852	1772.61	-0.643417	0.229918	-2.79846	0.00513463	0.0497477	AAEL012120	fad oxidoreductase [Source:VB Community Annotation]			GO:0016491,GO:0055114	oxidoreductase activity,oxidation-reduction process
LOC5578973	125.287	-0.593541	0.212123	-2.7981	0.00514044	0.0497683	AAEL023678				GO:0003779,GO:0005515	actin binding,protein binding
LOC110681241	187.887	0.994562	0.355607	2.7968	0.00516115	0.0499331	AAEL027458				GO:0005762	mitochondrial large ribosomal subunit
LOC5569011	369.671	0.641157	0.229279	2.7964	0.00516753	0.0499589	AAEL007291	replication factor A, 14kD-subunit, putative [Source:VB Community Annotation]			GO:0003677,GO:0005634,GO:0006260,GO:0006281,GO:0006310	DNA binding,nucleus,DNA replication,DNA repair,DNA recombination
LOC5565389	38.1017	-1.58864	0.568192	-2.79596	0.00517459	0.0499915	AAEL004777	Glycoprotein Hormone Family [Source:VB Community Annotation]	GPRGRK		GO:0004930,GO:0005515,GO:0005886,GO:0007186,GO:0016020,GO:0016021,GO:0016500	G protein-coupled receptor activity,protein binding,plasma membrane,G protein-coupled receptor signaling pathway,membrane,integral component of membrane,protein-hormone receptor activity
LOC5577777	4404.5	-0.376283	0.134604	-2.79549	0.00518208	0.050028	AAEL003285	translocation associated membrane protein [Source:VB Community Annotation]	TRAM		GO:0005623,GO:0006616,GO:0015031,GO:0016020,GO:0016021	obsolete cell,SRP-dependent cotranslational protein targeting to membrane, translocation,protein transport,membrane,integral component of membrane
LOC5567903	7.73565	-2.0717	0.74144	-2.79416	0.00520355	0.0501994	AAEL006328				GO:0005576,GO:0008061	extracellular region,chitin binding
LOC5579058	794.155	-0.353817	0.126688	-2.79282	0.00522514	0.0503717	AAEL013995	autophagy related gene [Source:VB Community Annotation]	APG18B		GO:0000045,GO:0000407,GO:0005515,GO:0006914,GO:0016020,GO:0032266,GO:0034045,GO:0080025	autophagosome assembly,phagophore assembly site,protein binding,autophagy,membrane,phosphatidylinositol-3-phosphate binding,phagophore assembly site membrane,phosphatidylinositol-3,5-bisphosphate binding
LOC5564513	444.461	0.495207	0.177369	2.79195	0.00523912	0.0504704	AAEL018319				GO:0005515	protein binding
LOC23687988	43.4883	-0.8564	0.307053	-2.78909	0.00528559	0.0508818	AAEL021711				GO:0005524,GO:0016887	ATP binding,ATPase activity
LOC5575548	52.4418	0.879161	0.31547	2.78683	0.00532259	0.0512015	AAEL002655	matrix metalloproteinase [Source:VB Community Annotation]			GO:0004222,GO:0006508,GO:0008233,GO:0008237,GO:0008270,GO:0016787,GO:0031012,GO:0046872	metalloendopeptidase activity,proteolysis,peptidase activity,metallopeptidase activity,zinc ion binding,hydrolase activity,extracellular matrix,metal ion binding
LOC5573266	1909.84	0.279992	0.100533	2.78509	0.00535128	0.0514408	AAEL019802	Protein RER1 [Source:UniProtKB/TrEMBL;Acc:Q16T78]			GO:0016020,GO:0016021	membrane,integral component of membrane
LOC5568466	125.334	-1.01428	0.364424	-2.78323	0.0053821	0.0517003	AAEL006881	multiple C2 domain and transmembrane region protein, putative [Source:VB Community Annotation]			GO:0016020,GO:0016021	membrane,integral component of membrane
LOC5567863	298.349	-1.55988	0.560574	-2.78265	0.00539171	0.0517378	AAEL006319
LOC110680585	183.432	-0.485401	0.174446	-2.78253	0.00539366	0.0517378	AAEL024815				GO:0005779,GO:0016559	integral component of peroxisomal membrane,peroxisome fission
LOC5575837	1048.51	0.344852	0.124007	2.78091	0.00542073	0.0519605	AAEL012094	casein kinase ii, alpha chain (cmgc group iv) [Source:VB Community Annotation]			GO:0000166,GO:0004672,GO:0004674,GO:0005524,GO:0006468	nucleotide binding,protein kinase activity,protein serine/threonine kinase activity,ATP binding,protein phosphorylation
LOC110677244	12.041	1.81455	0.65262	2.78042	0.00542894	0.0520023	AAEL020317
LOC110681031	230.336	0.436791	0.157212	2.77835	0.00546362	0.0522974	AAEL025146				GO:0003824,GO:0004372,GO:0019264,GO:0030170,GO:0035999	catalytic activity,glycine hydroxymethyltransferase activity,glycine biosynthetic process from serine,pyridoxal phosphate binding,tetrahydrofolate interconversion
LOC5565834	917.582	-0.492594	0.177337	-2.77773	0.00547396	0.0523593	AAEL005032
LOC5574555	285.429	0.704275	0.253636	2.77672	0.00549109	0.0524859	AAEL011233	SM protein G, putative [Source:VB Community Annotation]			GO:0000387,GO:0000398,GO:0003723,GO:0005634,GO:0005681,GO:0005682,GO:0005685,GO:0005686,GO:0005687,GO:0006397,GO:0008380,GO:0046540	spliceosomal snRNP assembly,mRNA splicing, via spliceosome,RNA binding,nucleus,spliceosomal complex,U5 snRNP,U1 snRNP,U2 snRNP,U4 snRNP,mRNA processing,RNA splicing,U4/U6 x U5 tri-snRNP complex
LOC5563842	294.86	-0.78444	0.282829	-2.77355	0.0055448	0.0529619	AAEL014170
LOC5578888	101.682	-0.661975	0.238743	-2.77275	0.00555846	0.0530548	AAEL019465				GO:0003779,GO:0005856,GO:0007015,GO:2000601	actin binding,cytoskeleton,actin filament organization,positive regulation of Arp2/3 complex-mediated actin nucleation
LOC5571011	844.016	0.402313	0.145149	2.77173	0.00557599	0.0531845	AAEL008736	p31A, putative [Source:VB Community Annotation]			GO:0003677,GO:0005634,GO:0006355	DNA binding,nucleus,regulation of transcription, DNA-templated
LOC5573312	298.849	-0.593003	0.213976	-2.77136	0.00558232	0.0532026	AAEL010416				GO:0016020,GO:0016021	membrane,integral component of membrane
LOC5575232	456.909	0.494291	0.17837	2.77116	0.00558576	0.0532026	AAEL025547				GO:0005634,GO:0005643,GO:0006913,GO:0015031,GO:0016020,GO:0017056,GO:0051028	nucleus,nuclear pore,nucleocytoplasmic transport,protein transport,membrane,structural constituent of nuclear pore,mRNA transport
LOC5574835	1101.11	-0.380486	0.137454	-2.7681	0.00563839	0.053666	AAEL011436	myosin xv [Source:VB Community Annotation]			GO:0000166,GO:0003774,GO:0003779,GO:0005515,GO:0005524,GO:0005737,GO:0005856,GO:0007605,GO:0016459	nucleotide binding,motor activity,actin binding,protein binding,ATP binding,cytoplasm,cytoskeleton,sensory perception of sound,myosin complex
LOC5572242	195.321	0.533247	0.192718	2.76698	0.00565775	0.0538124	AAEL009671	snrnp sm protein [Source:VB Community Annotation]			GO:0000398,GO:0000932,GO:0000956,GO:0003723,GO:0005634,GO:0005681,GO:0005688,GO:0006397,GO:0008380,GO:0033962,GO:0046540,GO:0071013,GO:1990726	mRNA splicing, via spliceosome,P-body,nuclear-transcribed mRNA catabolic process,RNA binding,nucleus,spliceosomal complex,U6 snRNP,mRNA processing,RNA splicing,cytoplasmic mRNA processing body assembly,U4/U6 x U5 tri-snRNP complex,catalytic step 2 spliceosome,Lsm1-7-Pat1 complex
LOC110680930	13.9749	-1.60154	0.578891	-2.76656	0.00566516	0.053845	AAEL024051
LOC5566102	2211.86	1.11643	0.403733	2.76527	0.00568763	0.0540205	AAEL015070	alkaline phosphatase [Source:VB Community Annotation]	mALP		GO:0003824,GO:0004035,GO:0016311,GO:0016791,GO:0031225	catalytic activity,alkaline phosphatase activity,dephosphorylation,phosphatase activity,anchored component of membrane
LOC5568116	112.724	0.551668	0.199573	2.76424	0.00570554	0.0541525	AAEL006542	retinoid-inducible serine carboxypeptidase (serine carboxypeptidase [Source:VB Community Annotation]			GO:0004185,GO:0006508	serine-type carboxypeptidase activity,proteolysis
LOC5575771	1117.25	0.390838	0.141407	2.76393	0.00571094	0.0541657	AAEL019965				GO:0003676,GO:0006397,GO:0008270,GO:0016567,GO:0046872,GO:0061630	nucleic acid binding,mRNA processing,zinc ion binding,protein ubiquitination,metal ion binding,ubiquitin protein ligase activity
LOC5573908	1886.79	0.899431	0.325458	2.76359	0.005717	0.0541852	AAEL002229	cuticle protein, putative [Source:VB Community Annotation]
LOC5568059	138.541	0.523228	0.189364	2.76308	0.00572588	0.0542312	AAEL006502				GO:0006364	rRNA processing
LOC5570794	1104.68	-0.630135	0.228121	-2.76228	0.00573989	0.0543258	AAEL008569
LOC5575078	349.826	0.571421	0.206912	2.76166	0.00575091	0.054352	AAEL011632	fk506 binding protein [Source:VB Community Annotation]			GO:0000413,GO:0003755,GO:0005515,GO:0005737,GO:0016853,GO:0031047,GO:0034587,GO:0051321	protein peptidyl-prolyl isomerization,peptidyl-prolyl cis-trans isomerase activity,protein binding,cytoplasm,isomerase activity,gene silencing by RNA,piRNA metabolic process,meiotic cell cycle
LOC5564571	90.8003	-0.799475	0.289498	-2.76159	0.0057521	0.054352	AAEL014518
LOC5568352	8.81171	-2.11188	0.764774	-2.76144	0.00575473	0.054352	AAEL001074	cadherin [Source:VB Community Annotation]			GO:0005509,GO:0005886,GO:0007155,GO:0007156,GO:0016020	calcium ion binding,plasma membrane,cell adhesion,homophilic cell adhesion via plasma membrane adhesion molecules,membrane
LOC5571114	110.331	-0.598652	0.217031	-2.75837	0.00580905	0.0548267	AAEL001519				GO:0005085	guanyl-nucleotide exchange factor activity
LOC5564250	493.835	0.448346	0.162569	2.75788	0.00581768	0.0548699	AAEL004183				GO:0005515,GO:0046872	protein binding,metal ion binding
LOC5567867	1450.2	0.33235	0.120527	2.75747	0.00582501	0.0549007	AAEL006320	protein tyrosine phosphatase 69d, drome [Source:VB Community Annotation]			GO:0004721,GO:0004725,GO:0005515,GO:0006470,GO:0016020,GO:0016021,GO:0016311,GO:0016787,GO:0016791,GO:0035335	phosphoprotein phosphatase activity,protein tyrosine phosphatase activity,protein binding,protein dephosphorylation,membrane,integral component of membrane,dephosphorylation,hydrolase activity,phosphatase activity,peptidyl-tyrosine dephosphorylation
LOC5572871	118.37	0.800472	0.290384	2.7566	0.00584053	0.0549983	AAEL010085	DNA polymerase epsilon subunit, putative [Source:VB Community Annotation]			GO:0005634,GO:0046982	nucleus,protein heterodimerization activity
LOC5564849	305.937	-0.42708	0.154944	-2.75635	0.00584506	0.0549983	AAEL000629	adenylate kinase 3, [Source:VB Community Annotation]			GO:0000166,GO:0004017,GO:0005524,GO:0005525,GO:0005739,GO:0005759,GO:0006139,GO:0006172,GO:0016301,GO:0016310,GO:0016740,GO:0016776,GO:0019205,GO:0046033,GO:0046039,GO:0046041,GO:0046899,GO:0046940	nucleotide binding,adenylate kinase activity,ATP binding,GTP binding,mitochondrion,mitochondrial matrix,nucleobase-containing compound metabolic process,ADP biosynthetic process,kinase activity,phosphorylation,transferase activity,phosphotransferase activity, phosphate group as acceptor,nucleobase-containing compound kinase activity,AMP metabolic process,GTP metabolic process,ITP metabolic proces…
LOC5567206	295.342	1.09016	0.395529	2.75621	0.00584759	0.0549983	AAEL021128				GO:0016787,GO:0052689	hydrolase activity,carboxylic ester hydrolase activity
LOC5566566	1577.47	-0.30912	0.112175	-2.7557	0.00585668	0.0550454	AAEL005481	alpha-glucosidase [Source:VB Community Annotation]			GO:0004553,GO:0005975,GO:0008152,GO:0016020,GO:0016021,GO:0016787,GO:0016798	hydrolase activity, hydrolyzing O-glycosyl compounds,carbohydrate metabolic process,metabolic process,membrane,integral component of membrane,hydrolase activity,hydrolase activity, acting on glycosyl bonds
LOC110676030	651.712	0.382331	0.138797	2.75461	0.00587627	0.0551912	AAEL024500				GO:0000139,GO:0005198,GO:0005515,GO:0005737,GO:0005794,GO:0006890,GO:0015031,GO:0016020,GO:0016192,GO:0031410	Golgi membrane,structural molecule activity,protein binding,cytoplasm,Golgi apparatus,retrograde vesicle-mediated transport, Golgi to endoplasmic reticulum,protein transport,membrane,vesicle-mediated transport,cytoplasmic vesicle
LOC5570336	665.58	0.559335	0.203091	2.75411	0.00588518	0.0552364	AAEL001382	small nuclear ribonucleoprotein sm d1 [Source:VB Community Annotation]			GO:0000387,GO:0005634,GO:0006396,GO:0006397,GO:0008380	spliceosomal snRNP assembly,nucleus,RNA processing,mRNA processing,RNA splicing
LOC5575816	294.238	-0.487616	0.17714	-2.75271	0.00591038	0.0554344	AAEL027091				GO:0016021,GO:0035461,GO:0051180,GO:0090482	integral component of membrane,vitamin transmembrane transport,vitamin transport,vitamin transmembrane transporter activity
LOC5576073	210.107	-0.517775	0.188156	-2.75183	0.00592625	0.055488	AAEL019545
LOC23687495	7065.52	0.264734	0.0962093	2.75165	0.0059296	0.055488	AAEL017075				GO:0005730,GO:0046872	nucleolus,metal ion binding
LOC110680784	181.235	-0.682661	0.248105	-2.75151	0.0059322	0.055488	AAEL022092				GO:0022857,GO:0055085	transmembrane transporter activity,transmembrane transport
LOC5580187	281.5	0.933188	0.339157	2.75149	0.00593253	0.055488	AAEL002554	anosmin, putative [Source:VB Community Annotation]			GO:0005515,GO:0005576,GO:0010466,GO:0030414	protein binding,extracellular region,negative regulation of peptidase activity,peptidase inhibitor activity
LOC5576894	3586.66	-0.397533	0.144505	-2.75101	0.00594127	0.0555314	AAEL003046	saposin [Source:VB Community Annotation]			GO:0005576,GO:0005764,GO:0006629,GO:0006665	extracellular region,lysosome,lipid metabolic process,sphingolipid metabolic process
LOC5570377	1530.67	0.883045	0.321157	2.74957	0.00596728	0.0557358	AAEL022408
LOC110680473	281.327	-0.470604	0.171233	-2.74832	0.00599008	0.0558707	AAEL020891
LOC5576631	7663.16	-0.534716	0.194571	-2.74819	0.0059926	0.0558707	AAEL019597				GO:0008643,GO:0016020,GO:0016021,GO:0022857,GO:0055085	carbohydrate transport,membrane,integral component of membrane,transmembrane transporter activity,transmembrane transport
LOC5576484	296.814	0.671431	0.244325	2.7481	0.00599412	0.0558707	AAEL002891				GO:0005634,GO:0005737,GO:0008080,GO:0010485,GO:0016740,GO:0016746,GO:0043967,GO:0043968,GO:0043998	nucleus,cytoplasm,N-acetyltransferase activity,H4 histone acetyltransferase activity,transferase activity,transferase activity, transferring acyl groups,histone H4 acetylation,histone H2A acetylation,H2A histone acetyltransferase activity
LOC5567870	105.412	0.706309	0.257124	2.74696	0.00601504	0.056027	AAEL006312				GO:0016020,GO:0016021	membrane,integral component of membrane
LOC5574435	839.738	-0.448573	0.163353	-2.74604	0.00603196	0.0561321	AAEL011161				GO:0003677,GO:0005634	DNA binding,nucleus
LOC5568600	1202.45	0.52268	0.19035	2.74589	0.00603463	0.0561321	AAEL001102	adenosine kinase [Source:VB Community Annotation]			GO:0004001,GO:0006166,GO:0016301,GO:0016310,GO:0016740,GO:0016773,GO:0044209	adenosine kinase activity,purine ribonucleoside salvage,kinase activity,phosphorylation,transferase activity,phosphotransferase activity, alcohol group as acceptor,AMP salvage
LOC23687839	15359.4	0.235532	0.0857866	2.74555	0.00604092	0.0561519	AAEL017419				GO:0003676,GO:0008270	nucleic acid binding,zinc ion binding
LOC110678991	109.647	-0.626136	0.228151	-2.74439	0.00606237	0.0563125	AAEL027217
LOC5570421	244.61	0.419368	0.152829	2.74404	0.00606887	0.0563342	AAEL008320				GO:0005524,GO:0016887	ATP binding,ATPase activity
LOC5567450	161.899	-3.2874	1.19826	-2.74348	0.00607915	0.0563908	AAEL006094				GO:0005549	odorant binding
LOC5575265	251.25	-0.517326	0.188595	-2.74305	0.00608717	0.0564087	AAEL022615				GO:0003824,GO:0006777,GO:0008265,GO:0016740,GO:0016829,GO:0030151,GO:0030170,GO:0043545,GO:0102867	catalytic activity,Mo-molybdopterin cofactor biosynthetic process,Mo-molybdopterin cofactor sulfurase activity,transferase activity,lyase activity,molybdenum ion binding,pyridoxal phosphate binding,molybdopterin cofactor metabolic process,molybdenum cofactor sulfurtransferase activity
LOC110678614	108.41	-3.04446	1.10993	-2.74293	0.00608944	0.0564087	AAEL022779
LOC23687418	86.4619	-2.07615	0.757027	-2.7425	0.00609732	0.056443	AAEL016998				GO:0004190,GO:0004222,GO:0006508,GO:0008233,GO:0008237	aspartic-type endopeptidase activity,metalloendopeptidase activity,proteolysis,peptidase activity,metallopeptidase activity
LOC5574548	160.058	0.559167	0.203908	2.74226	0.00610187	0.0564465	AAEL011222	Class B Scavenger Receptor (CD36 domain). [Source:VB Community Annotation]	SCRB5		GO:0005886,GO:0016020,GO:0016021	plasma membrane,membrane,integral component of membrane
LOC23687601	6.94697	2.58544	0.943091	2.74145	0.0061169	0.0565467	AAEL017181	GPCR Muscarinic Acetylcholine Family [Source:VB Community Annotation]	GPRMAC1		GO:0004930,GO:0005886,GO:0005887,GO:0007165,GO:0007186,GO:0007213,GO:0016020,GO:0016021,GO:0016907,GO:0045202	G protein-coupled receptor activity,plasma membrane,integral component of plasma membrane,signal transduction,G protein-coupled receptor signaling pathway,G protein-coupled acetylcholine receptor signaling pathway,membrane,integral component of membrane,G protein-coupled acetylcholine receptor activity,synapse
LOC5575041	90.4322	-0.875978	0.31967	-2.74026	0.00613915	0.0567137	AAEL011588				GO:0016020,GO:0016021	membrane,integral component of membrane
LOC5576419	618.077	-0.557578	0.203502	-2.73992	0.00614547	0.0567332	AAEL012513	calcium-binding protein E63-1 [Source:VB Community Annotation]			GO:0005509	calcium ion binding
LOC5575022	103.142	-1.71909	0.627542	-2.73941	0.00615499	0.0567823	AAEL011586				GO:0005576,GO:0008061	extracellular region,chitin binding
LOC5571452	249.023	0.410199	0.149788	2.73853	0.00617136	0.0568945	AAEL009084	slender lobes, putative [Source:VB Community Annotation]
LOC5580214	413.905	-0.555599	0.20292	-2.73802	0.00618109	0.0569453	AAEL011918				GO:0006629,GO:0016042,GO:0016787	lipid metabolic process,lipid catabolic process,hydrolase activity
LOC5574185	6.46174	2.45879	0.898859	2.73546	0.0062293	0.0573205	AAEL022107
LOC5571855	78.8724	0.88498	0.323528	2.73541	0.0062303	0.0573205	AAEL026761
LOC5576651	163.931	-0.594974	0.217529	-2.73515	0.00623522	0.0573267	AAEL012688
LOC110675551	14.2137	1.727	0.631518	2.73467	0.00624424	0.0573706	AAEL027144
LOC5568555	991.335	0.398074	0.145665	2.7328	0.00627982	0.0576582	AAEL001129				GO:0019888,GO:0030289,GO:0043666	protein phosphatase regulator activity,protein phosphatase 4 complex,regulation of phosphoprotein phosphatase activity
LOC5578831	4939.09	-0.370294	0.135512	-2.73256	0.0062844	0.0576611	AAEL013875	tetraspanin, putative [Source:VB Community Annotation]			GO:0016020,GO:0016021	membrane,integral component of membrane
LOC5569333	12613.6	0.456022	0.166921	2.73197	0.00629572	0.0577032	AAEL007555	acyl-coa dehydrogenase [Source:VB Community Annotation]			GO:0003995,GO:0016491,GO:0016627,GO:0050660,GO:0055114	acyl-CoA dehydrogenase activity,oxidoreductase activity,oxidoreductase activity, acting on the CH-CH group of donors,flavin adenine dinucleotide binding,oxidation-reduction process
LOC5577896	720.355	-0.405168	0.148311	-2.73187	0.00629754	0.0577032	AAEL019427
LOC5572040	494.064	0.461329	0.168921	2.73104	0.00631358	0.0578109	AAEL000226
LOC5568194	800.09	0.409365	0.15	2.7291	0.00635077	0.0581121	AAEL006611	ER membrane protein complex subunit 3 [Source:UniProtKB/TrEMBL;Acc:A0A1S4FE22]			GO:0016020,GO:0016021	membrane,integral component of membrane
LOC5571544	274.271	-0.598674	0.219419	-2.72846	0.00636312	0.0581857	AAEL009129	cytochrome P450 [Source:VB Community Annotation]	CYP6Z9		GO:0004497,GO:0005506,GO:0016491,GO:0016705,GO:0020037,GO:0046872,GO:0055114	monooxygenase activity,iron ion binding,oxidoreductase activity,oxidoreductase activity, acting on paired donors, with incorporation or reduction of molecular oxygen,heme binding,metal ion binding,oxidation-reduction process
LOC23687476	14335.2	-0.936003	0.343241	-2.72696	0.00639217	0.0584118	AAEL017056	Peptidoglycan Recognition Protein (Short) [Source:VB Community Annotation]	PGRPS4	PGRPS5
LOC5569448	334.78	-0.432145	0.158506	-2.72637	0.00640349	0.0584757	AAEL001244				GO:0005085	guanyl-nucleotide exchange factor activity
LOC5575907	422.568	-0.476975	0.174979	-2.72591	0.00641251	0.0585184	AAEL012153				GO:0016020,GO:0016021	membrane,integral component of membrane
LOC110675665	30.5481	0.987742	0.362649	2.72368	0.00645585	0.0588742	AAEL028005				GO:0035556	intracellular signal transduction
LOC110677108	139.703	-1.76588	0.648626	-2.7225	0.00647905	0.0590235	AAEL021463
LOC5577604	11202.9	0.789124	0.289863	2.7224	0.00648096	0.0590235	AAEL003225				GO:0042302	structural constituent of cuticle
LOC110677861	16892.1	-0.644578	0.236912	-2.72075	0.00651349	0.0592798	AAEL000585				GO:0005576,GO:0008061	extracellular region,chitin binding
LOC5566250	405.558	-2.3077	0.848491	-2.71977	0.00653265	0.0594141	AAEL015109	Clip-Domain Serine Protease family D. [Source:VB Community Annotation]	CLIPD10		GO:0004252,GO:0006508	serine-type endopeptidase activity,proteolysis
LOC5578686	1074.89	0.411721	0.151497	2.71769	0.00657393	0.0597493	AAEL003634	Hsp70-interacting protein, putative [Source:VB Community Annotation]			GO:0005515	protein binding
LOC5575364	230.507	0.572237	0.210666	2.71632	0.00660114	0.0599563	AAEL029016
LOC5570553	1083.54	-0.317557	0.116918	-2.71608	0.00660602	0.0599603	AAEL008374	E3 ubiquitin-protein ligase nedd-4 [Source:VB Community Annotation]			GO:0004842,GO:0005515,GO:0006511,GO:0016567,GO:0061630	ubiquitin-protein transferase activity,protein binding,ubiquitin-dependent protein catabolic process,protein ubiquitination,ubiquitin protein ligase activity
LOC5571823	5.15132	-3.2069	1.18147	-2.71433	0.00664104	0.0602377	AAEL001686
LOC5577983	163.1	0.530013	0.195348	2.71318	0.00666414	0.0603674	AAEL013463	nucleolar protein 10 [Source:VB Community Annotation]			GO:0005515,GO:0005634,GO:0005730	protein binding,nucleus,nucleolus
LOC5567856	188.408	0.484748	0.178665	2.71317	0.00666428	0.0603674	AAEL006311	nucleoporin, putative [Source:VB Community Annotation]			GO:0005198,GO:0005515,GO:0005764,GO:0015031,GO:1904263	structural molecule activity,protein binding,lysosome,protein transport,positive regulation of TORC1 signaling
LOC5569534	1157.8	0.368271	0.135817	2.71153	0.00669739	0.0606125	AAEL007725	reticulocalbin [Source:VB Community Annotation]			GO:0005509,GO:0005576,GO:0005783,GO:0005789,GO:0005794,GO:0016020,GO:0016529,GO:0033018,GO:0042470	calcium ion binding,extracellular region,endoplasmic reticulum,endoplasmic reticulum membrane,Golgi apparatus,membrane,sarcoplasmic reticulum,sarcoplasmic reticulum lumen,melanosome
LOC5577572	96.1276	-1.096	0.404242	-2.71125	0.00670304	0.0606125	AAEL013281	serine-type enodpeptidase [Source:VB Community Annotation]			GO:0004252,GO:0006508,GO:0008233,GO:0008236,GO:0016787	serine-type endopeptidase activity,proteolysis,peptidase activity,serine-type peptidase activity,hydrolase activity
LOC5573490	3605.14	-0.40905	0.150876	-2.71116	0.0067048	0.0606125	AAEL010540	alpha-amylase [Source:VB Community Annotation]			GO:0003824,GO:0005975,GO:0008152,GO:0016798	catalytic activity,carbohydrate metabolic process,metabolic process,hydrolase activity, acting on glycosyl bonds
LOC5565208	733.373	-0.40562	0.149624	-2.71094	0.00670936	0.0606132	AAEL019898
LOC5566033	504.824	-0.381314	0.140687	-2.71038	0.00672067	0.0606747	AAEL019679
LOC23687777	2288.85	-0.322953	0.119168	-2.71006	0.00672701	0.0606914	AAEL017357				GO:0004842,GO:0005634,GO:0005654,GO:0006281,GO:0006974,GO:0008270,GO:0016567	ubiquitin-protein transferase activity,nucleus,nucleoplasm,DNA repair,cellular response to DNA damage stimulus,zinc ion binding,protein ubiquitination
LOC5578976	1141.83	-0.40661	0.15012	-2.70857	0.00675739	0.0609247	AAEL027879
LOC5575019	657.5	-0.467139	0.172513	-2.70785	0.00677198	0.0610156	AAEL011575				GO:0005515,GO:0005634,GO:0005737,GO:0006511,GO:0007275,GO:0042025,GO:0046872	protein binding,nucleus,cytoplasm,ubiquitin-dependent protein catabolic process,multicellular organism development,host cell nucleus,metal ion binding
LOC5577241	478.605	-0.480774	0.177587	-2.70726	0.00678421	0.061085	AAEL003145	bestrophin 2,3,4 [Source:VB Community Annotation]			GO:0005254,GO:0005886,GO:0006811,GO:0006821,GO:0016020,GO:0016021,GO:0034707,GO:1902476	chloride channel activity,plasma membrane,ion transport,chloride transport,membrane,integral component of membrane,chloride channel complex,chloride transmembrane transport
LOC5570048	811.733	-0.423827	0.156599	-2.70646	0.00680056	0.0611701	AAEL000191				GO:0016020,GO:0016021	membrane,integral component of membrane
LOC110680923	25.6662	1.20449	0.44506	2.70635	0.00680272	0.0611701	AAEL024162
LOC5578016	565.552	0.366097	0.135308	2.70565	0.00681709	0.0612585	AAEL003367	nucleolar complex protein [Source:VB Community Annotation]			GO:0042254	ribosome biogenesis
LOC5566737	2225.4	-0.950475	0.351397	-2.70485	0.0068336	0.0613661	AAEL005609	trypsin [Source:VB Community Annotation]			GO:0004252,GO:0006508,GO:0008233,GO:0008236,GO:0016787	serine-type endopeptidase activity,proteolysis,peptidase activity,serine-type peptidase activity,hydrolase activity
LOC23687643	549.271	0.401669	0.148516	2.70455	0.00683972	0.0613802	AAEL028052
LOC5571009	108.819	0.590225	0.218299	2.70374	0.00685637	0.0614888	AAEL008724				GO:0006260,GO:0007064,GO:0031390	DNA replication,mitotic sister chromatid cohesion,Ctf18 RFC-like complex
LOC110678050	365.134	0.366658	0.135649	2.703	0.0068717	0.0615854	AAEL019823
LOC5570554	526.874	0.416345	0.154144	2.70102	0.0069128	0.0619127	AAEL008367	fk506-binding protein [Source:VB Community Annotation]			GO:0000413,GO:0003755,GO:0016853	protein peptidyl-prolyl isomerization,peptidyl-prolyl cis-trans isomerase activity,isomerase activity
LOC5563630	324.334	0.44467	0.164688	2.70008	0.00693236	0.0620101	AAEL000016	Esterase AAEL000016 [Source:UniProtKB/Swiss-Prot;Acc:Q0C7C4]			GO:0016787	hydrolase activity
LOC110676976	331.182	-0.581609	0.215407	-2.70005	0.00693287	0.0620101	AAEL026140
LOC5574023	19.1466	-1.49864	0.55536	-2.6985	0.00696536	0.0622595	AAEL010868	sugar transporter [Source:VB Community Annotation]			GO:0016020,GO:0016021,GO:0022857,GO:0055085	membrane,integral component of membrane,transmembrane transporter activity,transmembrane transport
LOC5567353	444.531	0.354026	0.131222	2.69792	0.00697734	0.0623254	AAEL014908				GO:0003924,GO:0005525	GTPase activity,GTP binding
LOC110674190	39.8941	-0.952201	0.353038	-2.69716	0.00699338	0.0624273	AAEL005073
LOC5568347	99.971	-0.64426	0.238905	-2.69673	0.0070025	0.0624675	AAEL001059	glutathione S-transferase (GSTD3) [Source:VB Community Annotation]	GSTD3		GO:0005515	protein binding
LOC5571531	421.612	-0.733353	0.272004	-2.69612	0.00701533	0.0625407	AAEL009120	cytochrome P450 [Source:VB Community Annotation]	CYP6S3		GO:0004497,GO:0005506,GO:0005789,GO:0016020,GO:0016491,GO:0016705,GO:0020037,GO:0031090,GO:0046872,GO:0055114	monooxygenase activity,iron ion binding,endoplasmic reticulum membrane,membrane,oxidoreductase activity,oxidoreductase activity, acting on paired donors, with incorporation or reduction of molecular oxygen,heme binding,organelle membrane,metal ion binding,oxidation-reduction process
LOC5568602	968.074	0.348245	0.129256	2.69422	0.00705531	0.0628556	AAEL001103	prefoldin, subunit, putative [Source:VB Community Annotation]			GO:0006457,GO:0016272,GO:0051082	protein folding,prefoldin complex,unfolded protein binding
LOC5577718	346.563	-0.941191	0.34957	-2.69242	0.00709349	0.0630999	AAEL019528				GO:0004114,GO:0006198,GO:0006355,GO:0007165,GO:0008081,GO:0016787,GO:0046872	3',5'-cyclic-nucleotide phosphodiesterase activity,cAMP catabolic process,regulation of transcription, DNA-templated,signal transduction,phosphoric diester hydrolase activity,hydrolase activity,metal ion binding
LOC5578519	100.573	0.549034	0.203929	2.69228	0.00709655	0.0630999	AAEL013722	partner of burs, putative [Source:VB Community Annotation]			GO:0001664,GO:0005184,GO:0007165,GO:0031395	G protein-coupled receptor binding,neuropeptide hormone activity,signal transduction,bursicon neuropeptide hormone complex
LOC110679459	87.3504	0.588099	0.218452	2.69211	0.00710006	0.0630999	AAEL019816
LOC110674521	14.88	1.87242	0.695582	2.69187	0.0071052	0.0630999	AAEL022894
LOC5568807	529.028	0.556686	0.206806	2.69183	0.00710609	0.0630999	AAEL001177	signal recognition particle, 14kD, putative [Source:VB Community Annotation]			GO:0005737,GO:0005786,GO:0006614,GO:0008312,GO:0030942,GO:0048500	cytoplasm,signal recognition particle, endoplasmic reticulum targeting,SRP-dependent cotranslational protein targeting to membrane,7S RNA binding,endoplasmic reticulum signal peptide binding,signal recognition particle
LOC5568246	1869.35	-0.285372	0.106062	-2.69063	0.00713172	0.0632858	AAEL006685	G-protein, gamma-subunit, putative [Source:VB Community Annotation]			GO:0003924,GO:0005834,GO:0005886,GO:0007165,GO:0007186,GO:0007200,GO:0016020,GO:0031681,GO:0050909	GTPase activity,heterotrimeric G-protein complex,plasma membrane,signal transduction,G protein-coupled receptor signaling pathway,phospholipase C-activating G protein-coupled receptor signaling pathway,membrane,G-protein beta-subunit binding,sensory perception of taste
LOC5575890	76.6154	0.673866	0.250604	2.68897	0.00716727	0.0635299	AAEL002753	zinc finger protein [Source:VB Community Annotation]			GO:0003676,GO:0005634,GO:0008270,GO:0046872	nucleic acid binding,nucleus,zinc ion binding,metal ion binding
LOC5565274	446.921	0.842707	0.313401	2.68891	0.00716863	0.0635299	AAEL004701	Argininosuccinate synthase (EC 6.3.4.5)(Citrulline--aspartate ligase) [Source:VB Community Annotation]			GO:0000050,GO:0000166,GO:0004055,GO:0005524,GO:0006526,GO:0008652,GO:0016874	urea cycle,nucleotide binding,argininosuccinate synthase activity,ATP binding,arginine biosynthetic process,cellular amino acid biosynthetic process,ligase activity
LOC5565765	1351.81	-0.281004	0.104535	-2.68814	0.00718502	0.0635928	AAEL004973	golgi phosphoprotein 3 (coat-protein GPP34) [Source:VB Community Annotation]			GO:0016020,GO:0070273	membrane,phosphatidylinositol-4-phosphate binding
LOC5580219	15161.7	-0.957726	0.356278	-2.68814	0.00718515	0.0635928	AAEL011929	serine-type enodpeptidase, [Source:VB Community Annotation]			GO:0004252,GO:0006508,GO:0008233,GO:0008236,GO:0016787	serine-type endopeptidase activity,proteolysis,peptidase activity,serine-type peptidase activity,hydrolase activity
LOC5566925	3994.08	0.652071	0.242635	2.68746	0.00719984	0.0636811	AAEL005694				GO:0003824,GO:0006596	catalytic activity,polyamine biosynthetic process
LOC5564975	145.929	0.55941	0.208216	2.68668	0.00721665	0.0637782	AAEL004511				GO:0016020,GO:0016021	membrane,integral component of membrane
LOC5575349	649.4	0.892312	0.332145	2.68651	0.00722026	0.0637782	AAEL002624	serine protease [Source:VB Community Annotation]			GO:0004252,GO:0006508	serine-type endopeptidase activity,proteolysis
LOC5573051	133.932	0.784382	0.292083	2.68548	0.00724264	0.063934	AAEL010220
LOC5564950	221.991	-0.870808	0.324352	-2.68476	0.0072581	0.063989	AAEL014662	AMP dependent coa ligase [Source:VB Community Annotation]			GO:0003824	catalytic activity
LOC5579826	67.1481	-0.743092	0.2768	-2.68458	0.00726202	0.063989	AAEL005525				GO:0000184,GO:0005515	nuclear-transcribed mRNA catabolic process, nonsense-mediated decay,protein binding
LOC110675600	12.4874	-1.5506	0.577605	-2.68454	0.00726307	0.063989	AAEL021818
LOC5569533	121.159	0.611771	0.227959	2.68369	0.00728147	0.0641092	AAEL007726				GO:0000724,GO:0005634,GO:0006281,GO:0006974,GO:0031297	double-strand break repair via homologous recombination,nucleus,DNA repair,cellular response to DNA damage stimulus,replication fork processing
LOC5575308	3946.12	-0.829726	0.309574	-2.68022	0.0073574	0.0647355	AAEL002613				GO:0005576,GO:0008061	extracellular region,chitin binding
LOC5572267	225.232	0.592817	0.221201	2.68	0.00736224	0.064736	AAEL001764	histone-fold protein CHRAC subunit, putative [Source:VB Community Annotation]			GO:0005634,GO:0046982	nucleus,protein heterodimerization activity
LOC5572645	74.6215	0.717608	0.267858	2.67907	0.00738276	0.0648741	AAEL001857				GO:0005515	protein binding
LOC5573941	145.9	0.522516	0.195083	2.67844	0.00739667	0.0649327	AAEL002232				GO:0003824,GO:0004526,GO:0004540,GO:0008033,GO:0090501,GO:0090502	catalytic activity,ribonuclease P activity,ribonuclease activity,tRNA processing,RNA phosphodiester bond hydrolysis,RNA phosphodiester bond hydrolysis, endonucleolytic
LOC5565445	425.079	-1.13595	0.424124	-2.67833	0.00739904	0.0649327	AAEL000670	methionine sulfoxide reductase [Source:VB Community Annotation]			GO:0008113,GO:0016491,GO:0055114	peptide-methionine (S)-S-oxide reductase activity,oxidoreductase activity,oxidation-reduction process
LOC110677878	84.051	-0.765271	0.285768	-2.67794	0.00740758	0.0649654	AAEL022459				GO:0005515	protein binding
LOC110676987	55.6364	0.758964	0.283752	2.67474	0.00747862	0.0655459	AAEL024597
LOC5565724	55.6124	-2.43341	0.90989	-2.6744	0.00748627	0.0655465	AAEL004953	elongase, putative [Source:VB Community Annotation]			GO:0006629,GO:0006631,GO:0006633,GO:0016020,GO:0016021,GO:0016740,GO:0102336,GO:0102337,GO:0102338,GO:0102756	lipid metabolic process,fatty acid metabolic process,fatty acid biosynthetic process,membrane,integral component of membrane,transferase activity,3-oxo-arachidoyl-CoA synthase activity,3-oxo-cerotoyl-CoA synthase activity,3-oxo-lignoceronyl-CoA synthase activity,very-long-chain 3-ketoacyl-CoA synthase activity
LOC5569002	8.91721	-2.51535	0.940563	-2.67431	0.00748839	0.0655465	AAEL007281	stretchin-mlck [Source:VB Community Annotation]
LOC5580145	21.4787	1.16469	0.435563	2.67398	0.00749574	0.0655683	AAEL002447
LOC5567367	467.91	-0.345396	0.129199	-2.67336	0.00750963	0.0656473	AAEL006025				GO:0005515,GO:0016020,GO:0016021	protein binding,membrane,integral component of membrane
LOC5564907	319.342	0.641773	0.240181	2.67204	0.00753921	0.0658632	AAEL014649				GO:0003676,GO:0003723	nucleic acid binding,RNA binding
LOC5569812	320.516	0.422819	0.158259	2.6717	0.00754688	0.0658876	AAEL001309
LOC5573200	2369.55	-0.459844	0.172139	-2.67135	0.00755468	0.0659131	AAEL001998				GO:0016020,GO:0016021	membrane,integral component of membrane
LOC110676628	36.5362	0.874946	0.327723	2.66978	0.00759018	0.0661801	AAEL022339
LOC5565720	26.9416	-1.16428	0.436244	-2.66887	0.00761066	0.0663159	AAEL004949	elongase, putative [Source:VB Community Annotation]			GO:0006629,GO:0006631,GO:0006633,GO:0016020,GO:0016021,GO:0016740,GO:0102336,GO:0102337,GO:0102338,GO:0102756	lipid metabolic process,fatty acid metabolic process,fatty acid biosynthetic process,membrane,integral component of membrane,transferase activity,3-oxo-arachidoyl-CoA synthase activity,3-oxo-cerotoyl-CoA synthase activity,3-oxo-lignoceronyl-CoA synthase activity,very-long-chain 3-ketoacyl-CoA synthase activity
LOC5571084	2911.94	0.881793	0.33096	2.66435	0.00771382	0.0671714	AAEL008789	apolipophorin-III, putative [Source:VB Community Annotation]			GO:0005576,GO:0006869,GO:0008289	extracellular region,lipid transport,lipid binding
LOC5578921	33.0783	-0.889791	0.334082	-2.66339	0.00773578	0.0673003	AAEL003766				GO:0016020,GO:0016798	membrane,hydrolase activity, acting on glycosyl bonds
LOC110675514	9.99587	-1.71327	0.6433	-2.66326	0.0077388	0.0673003	AAEL021546
LOC5571500	2024.7	0.322894	0.121258	2.66286	0.00774789	0.0673003	AAEL001623	proteasome activator subunit REG [Source:VB Community Annotation]	REG		GO:0000502,GO:0008537	proteasome complex,proteasome activator complex
LOC5563593	254.6	0.505416	0.189804	2.66283	0.00774856	0.0673003	AAEL000029	dopachrome-conversion enzyme (DCE), putative [Source:VB Community Annotation]
LOC5572453	355.092	0.682754	0.256433	2.6625	0.00775622	0.0673236	AAEL001813	sodium/solute symporter [Source:VB Community Annotation]			GO:0016020,GO:0016021,GO:0022857,GO:0055085	membrane,integral component of membrane,transmembrane transporter activity,transmembrane transport
LOC5567284	945.586	-0.310939	0.116804	-2.66206	0.00776651	0.0673696	AAEL021583
LOC5565156	5382.09	-0.418651	0.157352	-2.6606	0.00780012	0.0676177	AAEL004616	actin [Source:VB Community Annotation]			GO:0005524,GO:0005737,GO:0005856	ATP binding,cytoplasm,cytoskeleton
LOC5566842	11.6731	-2.94797	1.10828	-2.65995	0.00781516	0.0677047	AAEL000826				GO:0003676	nucleic acid binding
LOC5567370	403.04	-0.416914	0.156755	-2.65965	0.00782222	0.0677224	AAEL006020				GO:0003924,GO:0005525,GO:0046872	GTPase activity,GTP binding,metal ion binding
LOC5573316	525.162	0.380777	0.143223	2.65864	0.00784577	0.0678185	AAEL010414	set domain protein [Source:VB Community Annotation]			GO:0005515,GO:0005634,GO:0008168,GO:0016740,GO:0018024,GO:0032259,GO:0034968,GO:0046872	protein binding,nucleus,methyltransferase activity,transferase activity,histone-lysine N-methyltransferase activity,methylation,histone lysine methylation,metal ion binding
LOC5569180	1216.02	-0.730401	0.274729	-2.65862	0.00784611	0.0678185	AAEL007444				GO:0003677,GO:0003700,GO:0005634,GO:0006355	DNA binding,DNA-binding transcription factor activity,nucleus,regulation of transcription, DNA-templated
LOC5572150	2853.79	-0.823295	0.309681	-2.65852	0.00784839	0.0678185	AAEL009559	apolipoprotein D, putative [Source:VB Community Annotation]			GO:0031409	pigment binding
LOC5576315	651.937	0.477043	0.179469	2.65808	0.00785875	0.0678646	AAEL000387				GO:0005515	protein binding
LOC5566397	478.264	0.370458	0.139417	2.6572	0.00787924	0.0679642	AAEL005368				GO:0006352,GO:0006355,GO:0017025,GO:0046872,GO:0070897	DNA-templated transcription, initiation,regulation of transcription, DNA-templated,TBP-class protein binding,metal ion binding,transcription preinitiation complex assembly
LOC5568072	3149.48	0.395397	0.148805	2.65715	0.00788035	0.0679642	AAEL006514	sodium-dependent phosphate transporter [Source:VB Community Annotation]			GO:0016020,GO:0016021,GO:0022857,GO:0055085	membrane,integral component of membrane,transmembrane transporter activity,transmembrane transport
LOC5568981	1264.92	-0.308691	0.116229	-2.65589	0.00790989	0.0681755	AAEL007271	basic helix-loop-helix zip transcription factor [Source:VB Community Annotation]			GO:0000981,GO:0006355,GO:0006357,GO:0046983	DNA-binding transcription factor activity, RNA polymerase II-specific,regulation of transcription, DNA-templated,regulation of transcription by RNA polymerase II,protein dimerization activity
LOC110675194	41.2771	-1.05957	0.399034	-2.65534	0.00792274	0.0682426	AAEL027107				GO:0003723,GO:0005737,GO:0030430	RNA binding,cytoplasm,host cell cytoplasm
LOC110680597	294.906	-0.379651	0.143114	-2.65278	0.00798318	0.0687151	AAEL025587				GO:0005515,GO:0045721	protein binding,negative regulation of gluconeogenesis
LOC5569514	4289.75	0.265473	0.100081	2.65259	0.00798776	0.0687151	AAEL007702	chaperonin [Source:VB Community Annotation]			GO:0000166,GO:0005524,GO:0005737,GO:0006457,GO:0051082	nucleotide binding,ATP binding,cytoplasm,protein folding,unfolded protein binding
LOC5566429	111.433	0.643725	0.242821	2.65103	0.00802473	0.0689798	AAEL019600				GO:0003676,GO:0003723,GO:0005634,GO:0006355	nucleic acid binding,RNA binding,nucleus,regulation of transcription, DNA-templated
LOC5566736	448.123	-0.86247	0.325372	-2.65072	0.00803204	0.0689798	AAEL019920				GO:0004252,GO:0006508	serine-type endopeptidase activity,proteolysis
LOC5575858	307.978	-0.373401	0.140872	-2.65064	0.00803386	0.0689798	AAEL019972				GO:0005789,GO:0006672,GO:0016020,GO:0016021,GO:0090156	endoplasmic reticulum membrane,ceramide metabolic process,membrane,integral component of membrane,cellular sphingolipid homeostasis
LOC5564181	432.542	-0.4287	0.161902	-2.6479	0.00809925	0.0694972	AAEL004131	gh regulated tbc protein-1 [Source:VB Community Annotation]
LOC110676455	27.0444	-2.23926	0.84606	-2.64669	0.00812836	0.0697026	AAEL021424
LOC5573692	602.379	-0.702523	0.265517	-2.64587	0.0081481	0.0698276	AAEL010653	alpha-l-fucosidase [Source:VB Community Annotation]			GO:0004560,GO:0005975,GO:0006004,GO:0008152,GO:0016787,GO:0016798	alpha-L-fucosidase activity,carbohydrate metabolic process,fucose metabolic process,metabolic process,hydrolase activity,hydrolase activity, acting on glycosyl bonds
LOC110675789	15.8217	1.42944	0.540545	2.64445	0.00818247	0.0700777	AAEL022385	pickpocket 201 [Source:VB Community Annotation]	ppk201		GO:0005272,GO:0006814,GO:0016020	sodium channel activity,sodium ion transport,membrane
LOC5566849	28.416	-1.00615	0.380608	-2.64354	0.00820444	0.0702042	AAEL024981				GO:0004806,GO:0005576,GO:0052689	triglyceride lipase activity,extracellular region,carboxylic ester hydrolase activity
LOC5576202	275.509	-0.451646	0.170869	-2.64323	0.008212	0.0702042	AAEL012393				GO:0016020,GO:0016021	membrane,integral component of membrane
LOC5567068	22178.2	-0.403519	0.152664	-2.64319	0.00821284	0.0702042	AAEL005798	ATP synthase subunit beta vacuolar [Source:VB Community Annotation]			GO:0005524,GO:0006811,GO:0015991,GO:0033180,GO:0046034,GO:1902600	ATP binding,ion transport,GO_0015991,proton-transporting V-type ATPase, V1 domain,ATP metabolic process,proton transmembrane transport
LOC5565699	319.973	0.544779	0.206193	2.64209	0.00823968	0.070389	AAEL004931	beta-hexosaminidase b [Source:VB Community Annotation]			GO:0004553,GO:0004563,GO:0005975,GO:0008152,GO:0016787,GO:0016798,GO:0102148	hydrolase activity, hydrolyzing O-glycosyl compounds,beta-N-acetylhexosaminidase activity,carbohydrate metabolic process,metabolic process,hydrolase activity,hydrolase activity, acting on glycosyl bonds,N-acetyl-beta-D-galactosaminidase activity
LOC5576268	830.677	0.354497	0.134219	2.64118	0.00826177	0.0705332	AAEL012427				GO:0016491,GO:0016620,GO:0055114	oxidoreductase activity,oxidoreductase activity, acting on the aldehyde or oxo group of donors, NAD or NADP as acceptor,oxidation-reduction process
LOC5567587	1406.42	-0.30608	0.115947	-2.63983	0.00829476	0.0707449	AAEL006186				GO:0005515	protein binding
LOC5572258	161.682	0.72753	0.275607	2.63974	0.00829705	0.0707449	AAEL009685	oxidoreductase [Source:VB Community Annotation]			GO:0055114	oxidation-reduction process
LOC110675343	304.128	-0.399139	0.151233	-2.63923	0.00830945	0.0707667	AAEL024690				GO:0004222,GO:0006508,GO:0008233,GO:0008237,GO:0016787,GO:0046872	metalloendopeptidase activity,proteolysis,peptidase activity,metallopeptidase activity,hydrolase activity,metal ion binding
LOC5566114	4.23203	-3.55928	1.34862	-2.6392	0.00831008	0.0707667	AAEL020054
LOC5566592	198.265	0.578325	0.219306	2.63707	0.00836252	0.0711684	AAEL000782				GO:0005643,GO:0006913,GO:0015031,GO:0017056	nuclear pore,nucleocytoplasmic transport,protein transport,structural constituent of nuclear pore
LOC23687606	125.392	0.735654	0.279085	2.63595	0.0083902	0.0713589	AAEL017186	ATP-dependent DNA helicase PIF1 [Source:UniProtKB/TrEMBL;Acc:J9HF21]			GO:0000002,GO:0000166,GO:0000723,GO:0003677,GO:0003678,GO:0004386,GO:0005524,GO:0005634,GO:0005739,GO:0006281,GO:0006310,GO:0006974,GO:0016787,GO:0032508,GO:0043139,GO:0043141	mitochondrial genome maintenance,nucleotide binding,telomere maintenance,DNA binding,DNA helicase activity,helicase activity,ATP binding,nucleus,mitochondrion,DNA repair,DNA recombination,cellular response to DNA damage stimulus,hydrolase activity,DNA duplex unwinding,5'-3' DNA helicase activity,GO_0043141
LOC110679386	204.119	0.524604	0.199052	2.63551	0.00840116	0.0714072	AAEL025237				GO:0000178,GO:0005634,GO:0005737,GO:0006396	exosome (RNase complex),nucleus,cytoplasm,RNA processing
LOC110681168	348.703	-0.488095	0.185245	-2.63487	0.00841702	0.0714971	AAEL022327
LOC5572044	770.215	-0.798897	0.303335	-2.63371	0.0084457	0.0716956	AAEL000256	Class B Scavenger Receptor (CD36 domain). [Source:VB Community Annotation]	SCRB9		GO:0005886,GO:0016020,GO:0016021	plasma membrane,membrane,integral component of membrane
LOC5568677	13539.8	-0.985307	0.37415	-2.63346	0.00845206	0.0717045	AAEL007039	peptidoglycan recognition protein (short) [Source:VB Community Annotation]			GO:0002376,GO:0008270,GO:0008745,GO:0009253,GO:0042834,GO:0045087	immune system process,zinc ion binding,N-acetylmuramoyl-L-alanine amidase activity,peptidoglycan catabolic process,peptidoglycan binding,innate immune response
LOC5572361	394.871	-0.678304	0.257625	-2.63291	0.00846573	0.0717753	AAEL009753	sodium-dependent phosphate transporter [Source:VB Community Annotation]			GO:0016020,GO:0016021,GO:0022857,GO:0042302,GO:0055085	membrane,integral component of membrane,transmembrane transporter activity,structural constituent of cuticle,transmembrane transport
LOC5564156	194.578	-0.852164	0.323753	-2.63215	0.00848476	0.0718916	AAEL004127	acyl-coa dehydrogenase [Source:VB Community Annotation]			GO:0003995,GO:0016491,GO:0016627,GO:0050660,GO:0055114	acyl-CoA dehydrogenase activity,oxidoreductase activity,oxidoreductase activity, acting on the CH-CH group of donors,flavin adenine dinucleotide binding,oxidation-reduction process
LOC5571248	417.499	-0.379236	0.144102	-2.63172	0.00849551	0.0719109	AAEL001557	mucolipin [Source:VB Community Annotation]			GO:0005261,GO:0005886,GO:0016020,GO:0016021,GO:0034220,GO:0098655	cation channel activity,plasma membrane,membrane,integral component of membrane,ion transmembrane transport,cation transmembrane transport
LOC5580293	350.93	-0.433662	0.164789	-2.63163	0.00849769	0.0719109	AAEL020634				GO:0000166,GO:0003774,GO:0003777,GO:0005515,GO:0005524,GO:0007018,GO:0008017,GO:0035091	nucleotide binding,motor activity,microtubule motor activity,protein binding,ATP binding,microtubule-based movement,microtubule binding,phosphatidylinositol binding
LOC5566976	853.567	0.324405	0.123311	2.63079	0.00851869	0.0720435	AAEL005744	DEAD box ATP-dependent RNA helicase [Source:VB Community Annotation]			GO:0000166,GO:0003676,GO:0003723,GO:0003724,GO:0004386,GO:0005524,GO:0016787	nucleotide binding,nucleic acid binding,RNA binding,RNA helicase activity,helicase activity,ATP binding,hydrolase activity
LOC5570225	229.537	0.468903	0.178252	2.63057	0.00852427	0.0720456	AAEL008175	mitochondrial ribosomal protein, L44, putative [Source:VB Community Annotation]	mRpL44		GO:0004525,GO:0006396,GO:0090501,GO:0090502	ribonuclease III activity,RNA processing,RNA phosphodiester bond hydrolysis,RNA phosphodiester bond hydrolysis, endonucleolytic
LOC5573818	350.424	-0.615806	0.23422	-2.62918	0.00855919	0.0722681	AAEL010738	sodium bicarbonate cotransporter [Source:VB Community Annotation]			GO:0005452,GO:0006811,GO:0006820,GO:0008509,GO:0015698,GO:0016020,GO:0016021,GO:0098656	inorganic anion exchanger activity,ion transport,anion transport,anion transmembrane transporter activity,inorganic anion transport,membrane,integral component of membrane,anion transmembrane transport
LOC5563955	1758.96	0.35243	0.13405	2.62909	0.0085613	0.0722681	AAEL004040	protein phsophatase-2a [Source:VB Community Annotation]			GO:0004721,GO:0006470,GO:0016787	phosphoprotein phosphatase activity,protein dephosphorylation,hydrolase activity
LOC5574087	51.4879	-0.897858	0.341549	-2.62878	0.00856919	0.0722733	AAEL002257
LOC5569661	462.593	-1.12775	0.429055	-2.62845	0.00857753	0.0722733	AAEL007816	cytochrome P450 [Source:VB Community Annotation]	CYP4D23		GO:0004497,GO:0005506,GO:0016491,GO:0016705,GO:0020037,GO:0046872,GO:0055114	monooxygenase activity,iron ion binding,oxidoreductase activity,oxidoreductase activity, acting on paired donors, with incorporation or reduction of molecular oxygen,heme binding,metal ion binding,oxidation-reduction process
LOC23687652	5864.52	0.745369	0.283579	2.62843	0.00857797	0.0722733	AAEL017232
LOC110676462	433.128	0.495414	0.188508	2.62808	0.00858673	0.072302	AAEL019778
LOC5570029	937.61	-0.34645	0.131837	-2.62787	0.00859213	0.0723024	AAEL000194	phosphatidylinositol 4-kinase [Source:VB Community Annotation]			GO:0016301,GO:0016310,GO:0016740,GO:0046854,GO:0048015	kinase activity,phosphorylation,transferase activity,phosphatidylinositol phosphorylation,phosphatidylinositol-mediated signaling
LOC5569031	362.213	-0.677383	0.257884	-2.6267	0.00862183	0.0725071	AAEL019714				GO:0016020,GO:0016021	membrane,integral component of membrane
LOC5564591	151.185	0.652476	0.248462	2.62606	0.00863795	0.0725975	AAEL004328	origin recognition complex subunit [Source:VB Community Annotation]			GO:0003677,GO:0005634,GO:0005664,GO:0006260	DNA binding,nucleus,nuclear origin of replication recognition complex,DNA replication
LOC5579047	122.472	0.872156	0.332432	2.62357	0.00870148	0.0730854	AAEL013990	hexamerin 2 beta [Source:VB Community Annotation]
LOC110674845	5.40326	-2.47155	0.942132	-2.62336	0.00870682	0.0730854	AAEL028024
LOC5579808	167.133	-0.686231	0.261727	-2.62194	0.00874317	0.0733335	AAEL003971
LOC5574458	2650.09	-0.393888	0.150237	-2.62178	0.00874724	0.0733335	AAEL011180
LOC5564638	118.103	-0.649254	0.247792	-2.62016	0.00878882	0.0736364	AAEL004384
LOC5577357	1612.51	0.442633	0.169103	2.61754	0.00885656	0.0741579	AAEL000471	Monocarboxylate transporter [Source:UniProtKB/TrEMBL;Acc:A0A1S4EVY2]			GO:0016020,GO:0016021,GO:0022857,GO:0055085	membrane,integral component of membrane,transmembrane transporter activity,transmembrane transport
LOC5577062	1125.07	-0.792385	0.302853	-2.6164	0.00888615	0.0743048	AAEL026027				GO:0004857,GO:0004867,GO:0005576,GO:0010466,GO:0010951,GO:0030414,GO:0043086	enzyme inhibitor activity,serine-type endopeptidase inhibitor activity,extracellular region,negative regulation of peptidase activity,negative regulation of endopeptidase activity,peptidase inhibitor activity,negative regulation of catalytic activity
LOC5564707	408.786	0.446177	0.170536	2.61633	0.00888808	0.0743048	AAEL014576				GO:0005739,GO:0050684	mitochondrion,regulation of mRNA processing
LOC5578692	1336.28	0.597	0.228198	2.61616	0.0088926	0.0743048	AAEL022578	Clip-domain serine protease [Source:UniProtKB/TrEMBL;Acc:Q1HQI3]			GO:0004252,GO:0005576,GO:0006508,GO:0008233,GO:0008236,GO:0016787	serine-type endopeptidase activity,extracellular region,proteolysis,peptidase activity,serine-type peptidase activity,hydrolase activity
LOC5568173	1503.07	0.768582	0.293798	2.61602	0.00889611	0.0743048	AAEL006607	juvenile hormone-inducible protein, putative [Source:VB Community Annotation]
LOC5578291	531.5	-0.452192	0.17295	-2.61459	0.00893351	0.074571	AAEL013608	sugar transporter [Source:VB Community Annotation]			GO:0000139,GO:0008643,GO:0015165,GO:0016020,GO:0016021,GO:0090481	Golgi membrane,carbohydrate transport,pyrimidine nucleotide-sugar transmembrane transporter activity,membrane,integral component of membrane,pyrimidine nucleotide-sugar transmembrane transport
LOC110677913	215.011	-0.517442	0.197973	-2.6137	0.00895665	0.074718	AAEL024264				GO:0016020,GO:0016021,GO:0022857,GO:0055085	membrane,integral component of membrane,transmembrane transporter activity,transmembrane transport
LOC5577434	765.209	-0.970853	0.371552	-2.61297	0.00897603	0.0748335	AAEL013184				GO:0005267,GO:0006811,GO:0016020,GO:0016021,GO:0071805	potassium channel activity,ion transport,membrane,integral component of membrane,potassium ion transmembrane transport
LOC5571035	342.152	0.491657	0.188179	2.61271	0.0089828	0.0748437	AAEL008755	DNA-directed RNA polymerase II subunit [Source:VB Community Annotation]			GO:0003899,GO:0006351,GO:0046983	DNA-directed 5'-3' RNA polymerase activity,transcription, DNA-templated,protein dimerization activity
LOC5575578	278.235	-0.56316	0.215618	-2.61184	0.00900551	0.0749867	AAEL002668	AMP dependent ligase [Source:VB Community Annotation]			GO:0003824	catalytic activity
LOC5566041	28.6993	1.03786	0.397476	2.61113	0.00902429	0.0750779	AAEL021444
LOC110680783	431.142	-0.405103	0.15517	-2.6107	0.00903561	0.0750779	AAEL025590	Metalloendopeptidase [Source:UniProtKB/TrEMBL;Acc:Q17LV9]
LOC5569253	431.142	-0.405103	0.15517	-2.6107	0.00903561	0.0750779	AAEL001229	metalloproteinase, putative [Source:VB Community Annotation]			GO:0004222,GO:0006508,GO:0008233,GO:0008237,GO:0008270,GO:0016787,GO:0046872	metalloendopeptidase activity,proteolysis,peptidase activity,metallopeptidase activity,zinc ion binding,hydrolase activity,metal ion binding
LOC110674038	563.949	-0.402466	0.154167	-2.61059	0.0090387	0.0750779	AAEL023845				GO:0005509,GO:0005886,GO:0007155,GO:0007156,GO:0016020	calcium ion binding,plasma membrane,cell adhesion,homophilic cell adhesion via plasma membrane adhesion molecules,membrane
LOC5564334	675.274	-0.66062	0.253241	-2.60866	0.00908974	0.0754555	AAEL022076				GO:0005515,GO:0016020,GO:0016021	protein binding,membrane,integral component of membrane
LOC5577561	1071.39	0.432278	0.165743	2.60812	0.00910409	0.0755281	AAEL013275	importin beta-1 [Source:VB Community Annotation]			GO:0005623,GO:0005737,GO:0006606,GO:0006886,GO:0008536,GO:0015031	obsolete cell,cytoplasm,protein import into nucleus,intracellular protein transport,Ran GTPase binding,protein transport
LOC5573007	2232.72	0.37203	0.142698	2.60711	0.00913093	0.0756728	AAEL001925				GO:0003677,GO:0005634,GO:0005737,GO:0006211,GO:0008270,GO:0016491,GO:0046872,GO:0051213,GO:0055114,GO:0070579,GO:0080111	DNA binding,nucleus,cytoplasm,5-methylcytosine catabolic process,zinc ion binding,oxidoreductase activity,metal ion binding,dioxygenase activity,oxidation-reduction process,methylcytosine dioxygenase activity,DNA demethylation
LOC5576310	667.832	-0.590137	0.226362	-2.60705	0.00913273	0.0756728	AAEL012457	alcohol dehydrogenase [Source:VB Community Annotation]			GO:0005737,GO:0006693,GO:0016491,GO:0032440,GO:0036132,GO:0047522,GO:0055114	cytoplasm,prostaglandin metabolic process,oxidoreductase activity,2-alkenal reductase [NAD(P)+] activity,13-prostaglandin reductase activity,15-oxoprostaglandin 13-oxidase activity,oxidation-reduction process
LOC5580204	363.195	0.497587	0.190907	2.60643	0.00914908	0.0757364	AAEL002563	nuclear matrix protein [Source:VB Community Annotation]			GO:0005515,GO:0007165	protein binding,signal transduction
LOC5572840	3845.41	0.278503	0.106856	2.60634	0.00915162	0.0757364	AAEL010063	chaperonin [Source:VB Community Annotation]			GO:0000166,GO:0005524,GO:0005737,GO:0006457,GO:0051082	nucleotide binding,ATP binding,cytoplasm,protein folding,unfolded protein binding
LOC5569654	315.385	-0.958687	0.368064	-2.60467	0.00919617	0.0760585	AAEL026602				GO:0005507,GO:0016491,GO:0046872,GO:0055114	copper ion binding,oxidoreductase activity,metal ion binding,oxidation-reduction process
LOC5573219	353.282	0.455595	0.174947	2.60419	0.00920911	0.0761188	AAEL010317	DEAD box ATP-dependent RNA helicase [Source:VB Community Annotation]			GO:0000166,GO:0003676,GO:0003724,GO:0004386,GO:0005524,GO:0016787	nucleotide binding,nucleic acid binding,RNA helicase activity,helicase activity,ATP binding,hydrolase activity
LOC5570983	256.07	0.427313	0.164144	2.60329	0.00923349	0.0762737	AAEL008706	smooth muscle caldesmon, putative [Source:VB Community Annotation]			GO:0005634,GO:0005730,GO:0006364,GO:0032040	nucleus,nucleolus,rRNA processing,small-subunit processome
LOC110676485	12.8406	-1.52375	0.585464	-2.60263	0.00925114	0.0763311	AAEL020136
LOC5572006	45.0609	-0.961569	0.36947	-2.60256	0.00925303	0.0763311	AAEL009481				GO:0016020,GO:0016021	membrane,integral component of membrane
LOC5575606	302.077	-0.605909	0.232827	-2.6024	0.00925739	0.0763311	AAEL011937	glucosyl/glucuronosyl transferases [Source:VB Community Annotation]			GO:0008194,GO:0016020,GO:0016021,GO:0016740,GO:0016757,GO:0016758	UDP-glycosyltransferase activity,membrane,integral component of membrane,transferase activity,transferase activity, transferring glycosyl groups,transferase activity, transferring hexosyl groups
LOC5578924	54.2412	0.814834	0.313209	2.60157	0.00927983	0.0764695	AAEL019607	PBAN receptor [Source:UniProtKB/TrEMBL;Acc:V9P4J1]			GO:0001607,GO:0004930,GO:0005886,GO:0007165,GO:0007186,GO:0007218,GO:0016020,GO:0016021	neuromedin U receptor activity,G protein-coupled receptor activity,plasma membrane,signal transduction,G protein-coupled receptor signaling pathway,neuropeptide signaling pathway,membrane,integral component of membrane
LOC5571447	1573.93	-0.37102	0.142743	-2.59921	0.00934377	0.0769265	AAEL009088	liquid facets [Source:VB Community Annotation]			GO:0006897,GO:0008289,GO:0030128	endocytosis,lipid binding,clathrin coat of endocytic vesicle
LOC5575266	286.397	0.57153	0.219895	2.59911	0.00934669	0.0769265	AAEL011719				GO:0005515,GO:0031080	protein binding,nuclear pore outer ring
LOC5577134	315.46	0.974296	0.375056	2.59774	0.00938402	0.0771867	AAEL013031				GO:0042302	structural constituent of cuticle
LOC5568099	1315.63	-0.297924	0.114773	-2.59577	0.00943799	0.0775597	AAEL006552	WD-repeat protein [Source:VB Community Annotation]			GO:0005515	protein binding
LOC5566469	253.456	0.81379	0.313519	2.59566	0.00944085	0.0775597	AAEL005412	annexin x [Source:VB Community Annotation]			GO:0005509,GO:0005544	calcium ion binding,calcium-dependent phospholipid binding
LOC5578927	11814.3	0.34302	0.132224	2.59424	0.00947995	0.0778335	AAEL003750				GO:0005634	nucleus
LOC5572265	2372.55	-0.311071	0.119957	-2.59319	0.00950907	0.0780252	AAEL001769	DEAD box ATP-dependent RNA helicase [Source:VB Community Annotation]			GO:0000166,GO:0003676,GO:0003724,GO:0004386,GO:0005524,GO:0016787	nucleotide binding,nucleic acid binding,RNA helicase activity,helicase activity,ATP binding,hydrolase activity
LOC5572144	117.269	0.52108	0.201047	2.59183	0.00954661	0.0782666	AAEL009554				GO:0004252,GO:0006508	serine-type endopeptidase activity,proteolysis
LOC5570007	4440.96	0.224162	0.086492	2.59171	0.00955008	0.0782666	AAEL000175	Eukaryotic translation initiation factor 3 subunit C [Source:UniProtKB/Swiss-Prot;Acc:Q17Q06]	eIF3-S8		GO:0001732,GO:0002183,GO:0003723,GO:0003743,GO:0005737,GO:0005852,GO:0006412,GO:0006413,GO:0016282,GO:0031369,GO:0033290	formation of cytoplasmic translation initiation complex,cytoplasmic translational initiation,RNA binding,translation initiation factor activity,cytoplasm,eukaryotic translation initiation factor 3 complex,translation,translational initiation,eukaryotic 43S preinitiation complex,translation initiation factor binding,eukaryotic 48S preinitiation complex
LOC5577048	1209.3	0.796944	0.3077	2.59	0.00959759	0.0786082	AAEL012960	importin alpha [Source:VB Community Annotation]			GO:0005515,GO:0005634,GO:0005737,GO:0006606,GO:0008565,GO:0015031,GO:0042025,GO:0061608	protein binding,nucleus,cytoplasm,protein import into nucleus,obsolete protein transporter activity,protein transport,host cell nucleus,nuclear import signal receptor activity
LOC23687901	25251.5	0.276393	0.106733	2.58958	0.00960945	0.0786577	AAEL017481				GO:0003676,GO:0003723	nucleic acid binding,RNA binding
LOC110678437	15.2728	-1.42179	0.549207	-2.5888	0.00963108	0.078787	AAEL022345
LOC5565828	649.915	-0.332536	0.128536	-2.58709	0.00967892	0.0791304	AAEL014999				GO:0003676,GO:0003723,GO:1990904	nucleic acid binding,RNA binding,ribonucleoprotein complex
LOC5573911	211.941	1.52432	0.589411	2.58618	0.00970472	0.0792934	AAEL002223
LOC5575031	109.791	0.764597	0.295823	2.58464	0.009748	0.0795988	AAEL026676				GO:0005737,GO:0006457,GO:0016272,GO:0051082	cytoplasm,protein folding,prefoldin complex,unfolded protein binding
LOC5576401	453.226	0.39821	0.154097	2.58415	0.00976186	0.0796638	AAEL012489				GO:0005515,GO:0005623,GO:0005634,GO:0005643,GO:0006913,GO:0017056	protein binding,obsolete cell,nucleus,nuclear pore,nucleocytoplasmic transport,structural constituent of nuclear pore
LOC5574171	105.114	0.860407	0.333049	2.58343	0.00978246	0.0797838	AAEL002288	serine protease [Source:VB Community Annotation]			GO:0004252,GO:0006508	serine-type endopeptidase activity,proteolysis
LOC110677835	437.145	-0.461817	0.178789	-2.58303	0.0097937	0.0798272	AAEL022913
LOC5570895	916.843	0.428399	0.165877	2.58263	0.00980497	0.0798709	AAEL001496	Transcription elongation factor s-ii [Source:UniProtKB/TrEMBL;Acc:A0A1S4EYX3]			GO:0003676,GO:0005634,GO:0006351,GO:0006355,GO:0008270,GO:0046872	nucleic acid binding,nucleus,transcription, DNA-templated,regulation of transcription, DNA-templated,zinc ion binding,metal ion binding
LOC5569519	409.959	0.51742	0.200391	2.58206	0.00982133	0.079956	AAEL007701				GO:0008270,GO:0016567,GO:0046872,GO:0061630	zinc ion binding,protein ubiquitination,metal ion binding,ubiquitin protein ligase activity
LOC5575133	2387.4	-0.512524	0.198594	-2.58076	0.0098582	0.0801475	AAEL000314	malate dehydrogenase [Source:VB Community Annotation]			GO:0016491,GO:0055114	oxidoreductase activity,oxidation-reduction process
LOC5577036	1556.15	-0.507384	0.196609	-2.58068	0.00986057	0.0801475	AAEL025455				GO:0000123,GO:0005515,GO:0005634,GO:0016301,GO:0016310,GO:0016573,GO:0016740	histone acetyltransferase complex,protein binding,nucleus,kinase activity,phosphorylation,histone acetylation,transferase activity
LOC5568219	363.946	0.376292	0.145815	2.58061	0.00986267	0.0801475	AAEL006661	histone acetyltransferase, putative [Source:VB Community Annotation]			GO:0000166,GO:0003824,GO:0003899,GO:0005634,GO:0006352,GO:0030880,GO:0044237	nucleotide binding,catalytic activity,DNA-directed 5'-3' RNA polymerase activity,nucleus,DNA-templated transcription, initiation,RNA polymerase complex,cellular metabolic process
LOC5578261	535.56	-0.545135	0.211311	-2.57977	0.00988653	0.0802113	AAEL003494	goodpasture antigen-binding protein [Source:VB Community Annotation]			GO:0008289	lipid binding
LOC5569774	188.459	-0.426244	0.165233	-2.57966	0.00988982	0.0802113	AAEL018148				GO:0000166,GO:0000309,GO:0003824,GO:0004515,GO:0005524,GO:0009058,GO:0009435,GO:0016740,GO:0016779,GO:0019363	nucleotide binding,nicotinamide-nucleotide adenylyltransferase activity,catalytic activity,nicotinate-nucleotide adenylyltransferase activity,ATP binding,biosynthetic process,NAD biosynthetic process,transferase activity,nucleotidyltransferase activity,pyridine nucleotide biosynthetic process
LOC110674607	3.03026	4.00231	1.55155	2.57956	0.00989264	0.0802113	AAEL021007
LOC5567084	1203.5	0.334426	0.129648	2.5795	0.00989427	0.0802113	AAEL005821	alanyl aminopeptidase [Source:VB Community Annotation]			GO:0004177,GO:0006508,GO:0008233,GO:0008237,GO:0008270,GO:0016787,GO:0046872	aminopeptidase activity,proteolysis,peptidase activity,metallopeptidase activity,zinc ion binding,hydrolase activity,metal ion binding
LOC110681191	95.7756	-0.939393	0.364237	-2.57907	0.00990666	0.0802636	AAEL024256
LOC5577186	279.741	-0.433765	0.168406	-2.57571	0.0100035	0.0809972	AAEL013065	thiamin pyrophosphokinase [Source:VB Community Annotation]			GO:0016787	hydrolase activity
LOC110681310	183.672	-0.483947	0.187903	-2.57551	0.0100092	0.0809972	AAEL023742				GO:0016021,GO:0051180,GO:0090482	integral component of membrane,vitamin transport,vitamin transmembrane transporter activity
LOC5566582	169.448	0.732434	0.284575	2.57378	0.0100595	0.0813553	AAEL000786
LOC5576756	6.03932	-2.35053	0.913363	-2.57349	0.0100678	0.0813741	AAEL012737				GO:0016020,GO:0016021,GO:0016747	membrane,integral component of membrane,transferase activity, transferring acyl groups other than amino-acyl groups
LOC110680790	2.83124	3.90164	1.5166	2.57262	0.0100932	0.08153	AAEL025205
LOC5569893	351.153	-0.394825	0.153485	-2.5724	0.0100996	0.0815331	AAEL007996	centaurin alpha [Source:VB Community Annotation]			GO:0005096,GO:0043547,GO:0046872,GO:1902936	GTPase activator activity,positive regulation of GTPase activity,metal ion binding,phosphatidylinositol bisphosphate binding
LOC110676418	21.0383	1.21558	0.472727	2.57142	0.0101281	0.0817147	AAEL027172
LOC5571080	38227.7	-0.407899	0.158708	-2.57012	0.0101663	0.0819405	AAEL008787	V-type proton ATPase catalytic subunit A (V-ATPase subunit A)(EC 3.6.3.14)(Vacuolar proton pump subunit alpha)(V-ATPase 69 kDa subunit) [Source:VB Community Annotation]	VhaA		GO:0000166,GO:0005524,GO:0006811,GO:0015986,GO:0015991,GO:0033180,GO:0046034,GO:0046933,GO:0046961,GO:1902600	nucleotide binding,ATP binding,ion transport,ATP synthesis coupled proton transport,GO_0015991,proton-transporting V-type ATPase, V1 domain,ATP metabolic process,proton-transporting ATP synthase activity, rotational mechanism,proton-transporting ATPase activity, rotational mechanism,proton transmembrane transport
LOC5568712	362.37	-0.43376	0.168783	-2.56992	0.0101722	0.0819405	AAEL007062				GO:0016020,GO:0016021	membrane,integral component of membrane
LOC5578399	141.913	0.498536	0.193994	2.56985	0.0101743	0.0819405	AAEL026487				GO:0005524,GO:0006298,GO:0006974,GO:0016887,GO:0030983,GO:0032300	ATP binding,mismatch repair,cellular response to DNA damage stimulus,ATPase activity,mismatched DNA binding,mismatch repair complex
LOC5570822	224.017	-0.624368	0.243019	-2.56922	0.0101927	0.08204	AAEL008610	myosin vii [Source:VB Community Annotation]			GO:0000166,GO:0003774,GO:0003779,GO:0005515,GO:0005524,GO:0005737,GO:0005856,GO:0016459,GO:0051015	nucleotide binding,motor activity,actin binding,protein binding,ATP binding,cytoplasm,cytoskeleton,myosin complex,actin filament binding
LOC5577304	180.902	0.562841	0.219123	2.56861	0.0102109	0.082097	AAEL013151	orf protein [Source:VB Community Annotation]
LOC5578132	2095.68	0.319668	0.124454	2.56857	0.010212	0.082097	AAEL013517	pupal cuticle protein 78E, putative [Source:VB Community Annotation]			GO:0042302	structural constituent of cuticle
LOC5574062	950.905	0.404204	0.15738	2.56833	0.010219	0.0821049	AAEL010905				GO:0016020,GO:0016021,GO:0030001,GO:0046873,GO:0055085	membrane,integral component of membrane,metal ion transport,metal ion transmembrane transporter activity,transmembrane transport
LOC5572333	471.407	0.660632	0.257309	2.56746	0.0102445	0.0822607	AAEL009722	clip-domain serine protease, putative [Source:VB Community Annotation]			GO:0004252,GO:0006508	serine-type endopeptidase activity,proteolysis
LOC5572053	291.668	0.540478	0.210548	2.567	0.0102582	0.0823214	AAEL001706	p15-2a protein, putative [Source:VB Community Annotation]
LOC5571703	776.419	0.332124	0.129419	2.56627	0.0102798	0.0824462	AAEL009217	mitochondrial ribosomal protein, S35, putative [Source:VB Community Annotation]	mRpS35		GO:0003735,GO:0005739,GO:0032543	structural constituent of ribosome,mitochondrion,mitochondrial translation
LOC5569083	376.93	-0.416558	0.162371	-2.56547	0.0103036	0.0825881	AAEL001209	sodium-dependent phosphate transporter [Source:VB Community Annotation]			GO:0016020,GO:0016021,GO:0022857,GO:0055085	membrane,integral component of membrane,transmembrane transporter activity,transmembrane transport
LOC5565604	472.511	-0.361546	0.140958	-2.56493	0.0103198	0.0826342	AAEL004884	hemomucin [Source:VB Community Annotation]			GO:0009058,GO:0016844	biosynthetic process,strictosidine synthase activity
LOC5567808	538.804	-0.460588	0.179576	-2.56486	0.0103216	0.0826342	AAEL000985				GO:0007034,GO:0016020,GO:0016021,GO:0030001	vacuolar transport,membrane,integral component of membrane,metal ion transport
LOC5564170	76.7322	0.628046	0.245067	2.56276	0.0103845	0.0830715	AAEL004136				GO:0005515	protein binding
LOC110679707	1694.66	0.356803	0.139234	2.56262	0.0103885	0.0830715	AAEL019767				GO:0004252,GO:0006508	serine-type endopeptidase activity,proteolysis
LOC5575847	108.609	-0.583096	0.227616	-2.56176	0.0104143	0.0831847	AAEL012126	F-box/lrr protein, drome [Source:VB Community Annotation]
LOC110676240	155.868	-0.8582	0.335007	-2.56174	0.010415	0.0831847	AAEL025610				GO:0005515	protein binding
LOC5575114	68.3181	0.704362	0.275121	2.56019	0.0104616	0.0835072	AAEL011653	thyroid hormone receptor interactor [Source:VB Community Annotation]			GO:0000166,GO:0005524,GO:0016887,GO:0051321	nucleotide binding,ATP binding,ATPase activity,meiotic cell cycle
LOC5577251	193.212	-0.837671	0.327269	-2.55958	0.0104798	0.0836035	AAEL013109	glutamate transporter [Source:VB Community Annotation]			GO:0015293,GO:0016020,GO:0016021,GO:0055085	symporter activity,membrane,integral component of membrane,transmembrane transport
LOC5578812	92.8679	0.720336	0.281453	2.55934	0.010487	0.0836111	AAEL013852
LOC5570085	96.7556	-0.573052	0.223933	-2.55904	0.0104962	0.0836352	AAEL001358				GO:0016020,GO:0016021	membrane,integral component of membrane
LOC5568878	234.303	0.643991	0.251773	2.55783	0.0105328	0.0838311	AAEL022590				GO:0000166,GO:0003774,GO:0003777,GO:0005524,GO:0005874,GO:0007018,GO:0008017	nucleotide binding,motor activity,microtubule motor activity,ATP binding,microtubule,microtubule-based movement,microtubule binding
LOC5569091	377.091	0.368381	0.144022	2.55782	0.0105332	0.0838311	AAEL007355	mitochondrial ribosomal protein, S18A, putative [Source:VB Community Annotation]	mRpS18A		GO:0003735,GO:0005840,GO:0006412	structural constituent of ribosome,ribosome,translation
LOC5563717	1028.77	-0.320522	0.125328	-2.55747	0.0105438	0.0838658	AAEL003903	acid phosphatase-1 [Source:VB Community Annotation]			GO:0003993,GO:0016020,GO:0016021,GO:0016311	acid phosphatase activity,membrane,integral component of membrane,dephosphorylation
LOC5572132	606.221	-0.40876	0.159876	-2.55673	0.0105661	0.0839937	AAEL009547	NAD dehydrogenase [Source:UniProtKB/TrEMBL;Acc:A0A1S4FMS9]			GO:0005515,GO:0016491,GO:0055114	protein binding,oxidoreductase activity,oxidation-reduction process
LOC5578389	275.191	0.401187	0.156949	2.55617	0.0105831	0.0840798	AAEL013679	coilin-interacting nulcear ATPase protein, putative [Source:VB Community Annotation]			GO:0000166,GO:0004017,GO:0005524,GO:0005634,GO:0016301,GO:0016310,GO:0016740,GO:0016887,GO:0046940	nucleotide binding,adenylate kinase activity,ATP binding,nucleus,kinase activity,phosphorylation,transferase activity,ATPase activity,nucleoside monophosphate phosphorylation
LOC5575876	13.7381	1.37929	0.5397	2.55567	0.0105985	0.0841338	AAEL002742				GO:0016020,GO:0016021,GO:0022857,GO:0055085	membrane,integral component of membrane,transmembrane transporter activity,transmembrane transport
LOC5568611	4339.99	-0.261454	0.102323	-2.55519	0.0106129	0.0841338	AAEL006976				GO:0005634,GO:0016480	nucleus,negative regulation of transcription by RNA polymerase III
LOC5574652	312.833	-0.775152	0.30338	-2.55505	0.0106171	0.0841338	AAEL011292	protease m1 zinc metalloprotease [Source:VB Community Annotation]			GO:0004177,GO:0006508,GO:0008233,GO:0008237,GO:0008270,GO:0016787,GO:0046872	aminopeptidase activity,proteolysis,peptidase activity,metallopeptidase activity,zinc ion binding,hydrolase activity,metal ion binding
LOC5567338	8.19192	-2.85654	1.11803	-2.55499	0.0106192	0.0841338	AAEL019718				GO:0004129,GO:0005739,GO:0005743,GO:0005746,GO:0009055,GO:0016020,GO:0016021,GO:0022900,GO:1902600	cytochrome-c oxidase activity,mitochondrion,mitochondrial inner membrane,mitochondrial respirasome,electron transfer activity,membrane,integral component of membrane,electron transport chain,proton transmembrane transport
LOC5576247	159.373	0.607201	0.237659	2.55493	0.0106211	0.0841338	AAEL012404	transcription factor sp8,sp9 [Source:VB Community Annotation]			GO:0003676	nucleic acid binding
LOC5577017	427.094	-0.395547	0.154867	-2.5541	0.0106462	0.0842834	AAEL012941				GO:0008270,GO:0016020,GO:0016021	zinc ion binding,membrane,integral component of membrane
LOC110678561	14.5065	-1.46887	0.575177	-2.55376	0.0106565	0.084316	AAEL020025
LOC5575256	412.738	-2.37057	0.928502	-2.55312	0.0106763	0.084423	AAEL015559	zinc carboxypeptidase [Source:VB Community Annotation]			GO:0004180,GO:0004181,GO:0006508,GO:0008233,GO:0008237,GO:0008270,GO:0016787,GO:0046872	carboxypeptidase activity,metallocarboxypeptidase activity,proteolysis,peptidase activity,metallopeptidase activity,zinc ion binding,hydrolase activity,metal ion binding
LOC5578479	33.704	-2.15126	0.842737	-2.5527	0.0106891	0.084452	AAEL000484
LOC23687538	223.365	-0.434174	0.170092	-2.55258	0.0106927	0.084452	AAEL018186				GO:0016301,GO:0016303,GO:0016310,GO:0016740,GO:0046854,GO:0048015	kinase activity,1-phosphatidylinositol-3-kinase activity,phosphorylation,transferase activity,phosphatidylinositol phosphorylation,phosphatidylinositol-mediated signaling
LOC5573159	137.065	0.73553	0.288173	2.55239	0.0106988	0.084452	AAEL001988	protein serine/threonine kinase, putative [Source:VB Community Annotation]
LOC5572386	2043.49	0.399689	0.15664	2.55164	0.0107218	0.084583	AAEL027903				GO:0000166,GO:0005524,GO:0016740,GO:0019789	nucleotide binding,ATP binding,transferase activity,SUMO transferase activity
LOC5575286	716.44	0.392801	0.153953	2.55144	0.0107279	0.084583	AAEL023265				GO:0006355	regulation of transcription, DNA-templated
LOC5578974	1907.66	-0.384137	0.150646	-2.54993	0.0107743	0.0848996	AAEL019746
LOC5568060	10.7029	-2.8394	1.11441	-2.5479	0.0108373	0.0853464	AAEL006498	long wavelength sensitive opsin [Source:VB Community Annotation]	GPROP1		GO:0004930,GO:0007165,GO:0007186,GO:0007601,GO:0007602,GO:0009881,GO:0016020,GO:0016021,GO:0018298,GO:0050896	G protein-coupled receptor activity,signal transduction,G protein-coupled receptor signaling pathway,visual perception,phototransduction,photoreceptor activity,membrane,integral component of membrane,protein-chromophore linkage,response to stimulus
LOC5572301	1098.74	0.29552	0.11601	2.54737	0.0108537	0.0854258	AAEL001766	leucine-rich transmembrane proteins [Source:VB Community Annotation]			GO:0005515	protein binding
LOC5569016	941.576	0.365268	0.143446	2.54638	0.0108847	0.0855795	AAEL007286	arginine-rich protein, putative [Source:VB Community Annotation]	Manf		GO:0005509,GO:0005576,GO:0007275	calcium ion binding,extracellular region,multicellular organism development
LOC110681126	132.754	-0.721236	0.283244	-2.54634	0.0108859	0.0855795	AAEL026956
LOC5568821	247.83	-0.395443	0.15532	-2.54599	0.010897	0.0856164	AAEL001191				GO:0016020,GO:0016021,GO:0016787	membrane,integral component of membrane,hydrolase activity
LOC5574454	250.256	0.480854	0.188893	2.54564	0.0109077	0.0856512	AAEL011171	low-Mr GTP-binding protein Rab31, putative [Source:VB Community Annotation]			GO:0003924,GO:0005525	GTPase activity,GTP binding
LOC5575403	282.312	-0.874791	0.343804	-2.54444	0.0109452	0.0858873	AAEL027830				GO:0016614,GO:0050660,GO:0055114	oxidoreductase activity, acting on CH-OH group of donors,flavin adenine dinucleotide binding,oxidation-reduction process
LOC5568514	338.546	0.861312	0.33853	2.54427	0.0109505	0.0858873	AAEL006932	transcription factor ap-2 [Source:VB Community Annotation]			GO:0003700,GO:0005634,GO:0006355	DNA-binding transcription factor activity,nucleus,regulation of transcription, DNA-templated
LOC5570732	284.009	0.468248	0.184118	2.54319	0.0109845	0.0861039	AAEL020636				GO:0007049	cell cycle
LOC110680425	29.7439	-1.34805	0.530358	-2.54178	0.011029	0.0864021	AAEL020981				GO:0016021,GO:0055085	integral component of membrane,transmembrane transport
LOC110677906	10.7571	-1.61027	0.634061	-2.53961	0.0110976	0.0868898	AAEL021107
[truncated: 17,535 more rows]
