# Supplementary material for: Engineered Antiviral Sensor Targets Infected Mosquitoes
Source: bioRxiv preprint, doi:10.1101/2023.01.27.525922, version 1 (2023-01-27)
Supplement: Table S16 [file 525922_file18.xlsx]

## Sheet: Sheet1
NCBI_ID	baseMean	log2FoldChange	lfcSE	stat	pvalue	padj	AAEL_ID	gene_description	gene_name	gene_synomym	GO_ID	GO_name
LOC5567288	733.629	-4.11918	0.178354	-23.0955	5.13838e-118	7.30009e-114	AAEL020376				GO:0005247,GO:0006811,GO:0006821,GO:0016020,GO:0016021,GO:0055085,GO:1902476	voltage-gated chloride channel activity,ion transport,chloride transport,membrane,integral component of membrane,transmembrane transport,chloride transmembrane transport
LOC5571116	646.499	-2.54445	0.166264	-15.3036	7.22916e-53	5.13523e-49	AAEL001514				GO:0005576,GO:0006030,GO:0008061	extracellular region,chitin metabolic process,chitin binding
LOC5568182	12238.7	-1.69458	0.111886	-15.1457	8.09416e-52	3.83313e-48	AAEL006627	serine-type enodpeptidase, [Source:VB Community Annotation]			GO:0004252,GO:0006508,GO:0008233,GO:0008236,GO:0016787	serine-type endopeptidase activity,proteolysis,peptidase activity,serine-type peptidase activity,hydrolase activity
LOC110681120	1717.14	-2.538	0.172753	-14.6915	7.30492e-49	2.07562e-45	AAEL028198	Carboxylic ester hydrolase (Fragment) [Source:UniProtKB/TrEMBL;Acc:Q17G40]
LOC5577515	1717.14	-2.538	0.172753	-14.6915	7.30492e-49	2.07562e-45	AAEL028198	Carboxylic ester hydrolase (Fragment) [Source:UniProtKB/TrEMBL;Acc:Q17G40]			GO:0016787,GO:0052689	hydrolase activity,carboxylic ester hydrolase activity
LOC110674150	218.694	3.07703	0.218661	14.0722	5.63205e-45	1.33357e-41	AAEL017975	heat shock protein HSP70 [Source:VB Community Annotation]	HSP70Ba
LOC5576506	3671.9	-1.83541	0.130679	-14.0452	8.24371e-45	1.67312e-41	AAEL012558	serine collagenase 1 precursor, putative [Source:VB Community Annotation]			GO:0004252,GO:0006508	serine-type endopeptidase activity,proteolysis
LOC5577716	333.13	2.40828	0.180047	13.3758	8.37448e-41	1.4872e-37	AAEL013347	lethal(2)essential for life protein, l2efl [Source:VB Community Annotation]			GO:0046872	metal ion binding
LOC5570262	5128.32	-1.3543	0.101415	-13.354	1.12265e-40	1.77217e-37	AAEL008221	serine protease [Source:VB Community Annotation]			GO:0004252,GO:0006508,GO:0008233,GO:0008236,GO:0016787	serine-type endopeptidase activity,proteolysis,peptidase activity,serine-type peptidase activity,hydrolase activity
LOC110676766	668.946	3.38759	0.254293	13.3216	1.7334e-40	2.46265e-37	AAEL021154
LOC110674148	193.069	2.55592	0.194135	13.1656	1.38345e-39	1.78679e-36	AAEL027610				GO:0000166,GO:0005524	nucleotide binding,ATP binding
LOC5578364	254.557	2.48738	0.189578	13.1206	2.50798e-39	2.96924e-36	AAEL003522	protein arginine n-methyltransferase [Source:VB Community Annotation]			GO:0006479,GO:0008168,GO:0016274,GO:0016740,GO:0018216,GO:0032259,GO:0035246	protein methylation,methyltransferase activity,protein-arginine N-methyltransferase activity,transferase activity,peptidyl-arginine methylation,methylation,peptidyl-arginine N-methylation
LOC5573924	569.904	2.3222	0.180445	12.8693	6.69906e-38	7.32104e-35	AAEL002231	cuticle protein, putative [Source:VB Community Annotation]
LOC5577775	157.539	2.72012	0.219363	12.4001	2.61073e-35	2.64933e-32	AAEL003299
LOC5569610	6820.74	1.84541	0.149751	12.3232	6.7949e-35	6.43568e-32	AAEL001256
LOC5580220	1300.6	-1.96385	0.161673	-12.147	5.94949e-34	5.28278e-31	AAEL011916	serine-type enodpeptidase, [Source:VB Community Annotation]			GO:0004252,GO:0006508,GO:0008233,GO:0008236,GO:0016787	serine-type endopeptidase activity,proteolysis,peptidase activity,serine-type peptidase activity,hydrolase activity
LOC5565448	188.935	3.94541	0.325244	12.1306	7.27026e-34	6.0758e-31	AAEL000668				GO:0005515	protein binding
LOC5579509	8825.98	-1.97874	0.163624	-12.0932	1.1471e-33	9.05378e-31	AAEL015137	Niemann-Pick Type C-2, putative [Source:VB Community Annotation]
LOC5565636	634.45	-2.07852	0.172389	-12.0571	1.7786e-33	1.32992e-30	AAEL014916	lipase 1 precursor [Source:VB Community Annotation]			GO:0016042,GO:0016787,GO:0016788	lipid catabolic process,hydrolase activity,hydrolase activity, acting on ester bonds
LOC5569114	5585.17	-2.50624	0.208873	-11.9988	3.60276e-33	2.55922e-30	AAEL007377	ammonium transporter [Source:VB Community Annotation]			GO:0008519,GO:0015696,GO:0016020,GO:0016021,GO:0072488	ammonium transmembrane transporter activity,ammonium transport,membrane,integral component of membrane,ammonium transmembrane transport
LOC5574477	470.452	-3.86757	0.325118	-11.8959	1.24325e-32	8.41088e-30	AAEL002404	receptor protein tyrosine kinase [Source:VB Community Annotation]			GO:0004672,GO:0004713,GO:0005515,GO:0005524,GO:0006468,GO:0016020,GO:0016021,GO:0018108	protein kinase activity,protein tyrosine kinase activity,protein binding,ATP binding,protein phosphorylation,membrane,integral component of membrane,peptidyl-tyrosine phosphorylation
LOC110681121	353.132	-2.17779	0.184387	-11.811	3.4247e-32	2.15513e-29	AAEL022449
LOC5569609	5429.8	1.64096	0.138976	11.8075	3.57101e-32	2.15513e-29	AAEL001248
LOC5577513	346.853	-2.13977	0.181246	-11.8059	3.64068e-32	2.15513e-29	AAEL003181	Carboxy/choline esterase Alpha Esterase [Source:VB Community Annotation]	CCEAE3C		GO:0016787,GO:0052689	hydrolase activity,carboxylic ester hydrolase activity
LOC5574378	2884.94	-2.26953	0.193986	-11.6995	1.28243e-31	7.28779e-29	AAEL011109				GO:0006812,GO:0015299,GO:0016020,GO:0016021,GO:0055085,GO:1902600	cation transport,solute:proton antiporter activity,membrane,integral component of membrane,transmembrane transport,proton transmembrane transport
LOC5576507	3221.36	-2.05256	0.178409	-11.5048	1.24738e-30	6.81595e-28	AAEL012560	serine collagenase 1 precursor, putative [Source:VB Community Annotation]			GO:0004252,GO:0006508	serine-type endopeptidase activity,proteolysis
LOC5580217	1195.87	-1.47771	0.129703	-11.393	4.53143e-30	2.38437e-27	AAEL024686
LOC5580219	22964.3	-1.71114	0.152789	-11.1994	4.1064e-29	2.08356e-26	AAEL011929	serine-type enodpeptidase, [Source:VB Community Annotation]			GO:0004252,GO:0006508,GO:0008233,GO:0008236,GO:0016787	serine-type endopeptidase activity,proteolysis,peptidase activity,serine-type peptidase activity,hydrolase activity
LOC5570272	1077.47	-1.8172	0.163054	-11.1448	7.59568e-29	3.7211e-26	AAEL008201	serine collagenase 1 precursor, putative [Source:VB Community Annotation]			GO:0004252,GO:0006508	serine-type endopeptidase activity,proteolysis
LOC5576508	255.681	-2.98248	0.267793	-11.1373	8.26158e-29	3.91241e-26	AAEL012557	serine collagenase 1 precursor, putative [Source:VB Community Annotation]			GO:0004252,GO:0006508	serine-type endopeptidase activity,proteolysis
LOC110678076	187.616	2.04404	0.184266	11.0928	1.35914e-28	6.22882e-26	AAEL023164
LOC5566738	14185.8	-1.79533	0.163149	-11.0042	3.64774e-28	1.61948e-25	AAEL019919				GO:0004252,GO:0006508,GO:0008233,GO:0008236,GO:0016787	serine-type endopeptidase activity,proteolysis,peptidase activity,serine-type peptidase activity,hydrolase activity
LOC5567220	187.256	2.66464	0.243672	10.9354	7.80803e-28	3.36148e-25	AAEL000898				GO:0016787,GO:0052689	hydrolase activity,carboxylic ester hydrolase activity
LOC5568699	531.704	-2.20148	0.202445	-10.8745	1.52475e-27	6.37122e-25	AAEL007051	lipase [Source:VB Community Annotation]			GO:0004806,GO:0005576,GO:0006629,GO:0052689	triglyceride lipase activity,extracellular region,lipid metabolic process,carboxylic ester hydrolase activity
LOC5578181	378.15	-1.56617	0.144775	-10.818	2.82982e-27	1.14866e-24	AAEL013554	cytochrome P450 [Source:VB Community Annotation]	CYP4J14		GO:0004497,GO:0005506,GO:0005789,GO:0016020,GO:0016021,GO:0016491,GO:0016705,GO:0020037,GO:0031090,GO:0046872,GO:0055114	monooxygenase activity,iron ion binding,endoplasmic reticulum membrane,membrane,integral component of membrane,oxidoreductase activity,oxidoreductase activity, acting on paired donors, with incorporation or reduction of molecular oxygen,heme binding,organelle membrane,metal ion binding,oxidation-reduction process
LOC5566736	685.288	-1.64705	0.152971	-10.7671	4.92125e-27	1.94212e-24	AAEL019920				GO:0004252,GO:0006508	serine-type endopeptidase activity,proteolysis
LOC5580218	1500.1	-1.53396	0.143272	-10.7066	9.47619e-27	3.6386e-24	AAEL024686				GO:0004252,GO:0006508,GO:0008233,GO:0008236,GO:0016787	serine-type endopeptidase activity,proteolysis,peptidase activity,serine-type peptidase activity,hydrolase activity
LOC5570823	1091.82	-2.13631	0.204041	-10.47	1.18616e-25	4.43467e-23	AAEL008604	zinc carboxypeptidase [Source:VB Community Annotation]			GO:0004180,GO:0004181,GO:0006508,GO:0008233,GO:0008237,GO:0008270,GO:0016787,GO:0046872	carboxypeptidase activity,metallocarboxypeptidase activity,proteolysis,peptidase activity,metallopeptidase activity,zinc ion binding,hydrolase activity,metal ion binding
LOC5566631	37827.5	2.4762	0.236586	10.4664	1.23273e-25	4.49063e-23	AAEL021888
LOC5568704	15128.7	-1.98386	0.192793	-10.2901	7.80945e-25	2.77372e-22	AAEL007044	Lipase [Source:UniProtKB/TrEMBL;Acc:A0A1S4FFB7]			GO:0004806,GO:0005576,GO:0006629,GO:0008970,GO:0052689	triglyceride lipase activity,extracellular region,lipid metabolic process,phospholipase A1 activity,carboxylic ester hydrolase activity
LOC5573388	344.924	-1.74246	0.169803	-10.2617	1.04862e-24	3.6336e-22	AAEL002085	cytochrome P450 [Source:VB Community Annotation]	CYP4H31		GO:0004497,GO:0005506,GO:0016491,GO:0016705,GO:0020037,GO:0046872,GO:0055114	monooxygenase activity,iron ion binding,oxidoreductase activity,oxidoreductase activity, acting on paired donors, with incorporation or reduction of molecular oxygen,heme binding,metal ion binding,oxidation-reduction process
LOC5570263	4960.4	-1.41561	0.138747	-10.2028	1.92584e-24	6.51437e-22	AAEL008218	serine-type enodpeptidase, [Source:VB Community Annotation]			GO:0004252,GO:0006508,GO:0008233,GO:0008236,GO:0016787	serine-type endopeptidase activity,proteolysis,peptidase activity,serine-type peptidase activity,hydrolase activity
LOC110674151	174.838	3.10673	0.309216	10.0471	9.45987e-24	3.1255e-21	AAEL017976	heat shock protein HSP70 [Source:VB Community Annotation]	HSP70Bb
LOC5568487	5374.6	-2.33493	0.23282	-10.0289	1.13753e-23	3.67293e-21	AAEL006902	serine-type enodpeptidase, [Source:VB Community Annotation]			GO:0004252,GO:0006508,GO:0008233,GO:0008236,GO:0016787	serine-type endopeptidase activity,proteolysis,peptidase activity,serine-type peptidase activity,hydrolase activity
LOC5566737	3726.72	-1.88908	0.188512	-10.021	1.23284e-23	3.89223e-21	AAEL005609	trypsin [Source:VB Community Annotation]			GO:0004252,GO:0006508,GO:0008233,GO:0008236,GO:0016787	serine-type endopeptidase activity,proteolysis,peptidase activity,serine-type peptidase activity,hydrolase activity
LOC5571549	632.131	-1.63344	0.163128	-10.0133	1.333e-23	4.11693e-21	AAEL009121	cytochrome P450 [Source:VB Community Annotation]	CYP6N9		GO:0004497,GO:0005506,GO:0016491,GO:0016705,GO:0020037,GO:0043231,GO:0046872,GO:0055114	monooxygenase activity,iron ion binding,oxidoreductase activity,oxidoreductase activity, acting on paired donors, with incorporation or reduction of molecular oxygen,heme binding,intracellular membrane-bounded organelle,metal ion binding,oxidation-reduction process
LOC5566739	5171.53	-1.52122	0.15225	-9.99162	1.65854e-23	5.01337e-21	AAEL005607	trypsin [Source:VB Community Annotation]			GO:0004252,GO:0006508,GO:0008233,GO:0008236,GO:0016787	serine-type endopeptidase activity,proteolysis,peptidase activity,serine-type peptidase activity,hydrolase activity
LOC5564954	254.541	-3.04377	0.30502	-9.97892	1.88514e-23	5.57963e-21	AAEL014668	ankyrin 2,3/unc44 [Source:VB Community Annotation]			GO:0005515	protein binding
LOC5568700	4281.89	-1.713	0.172075	-9.95496	2.3993e-23	6.9565e-21	AAEL007070	lipase [Source:VB Community Annotation]			GO:0004806,GO:0005576,GO:0006629,GO:0052689	triglyceride lipase activity,extracellular region,lipid metabolic process,carboxylic ester hydrolase activity
LOC5567885	1404.34	-1.28303	0.130699	-9.81672	9.53948e-23	2.71055e-20	AAEL006359	sulfotransferase (sult) [Source:VB Community Annotation]			GO:0008146,GO:0016740	sulfotransferase activity,transferase activity
LOC5570259	10720.2	-1.83079	0.187114	-9.78433	1.31458e-22	3.662e-20	AAEL008208	serine protease [Source:VB Community Annotation]			GO:0004252,GO:0006508,GO:0008233,GO:0008236,GO:0016787	serine-type endopeptidase activity,proteolysis,peptidase activity,serine-type peptidase activity,hydrolase activity
LOC5578379	2386.99	1.152	0.119419	9.6467	5.0765e-22	1.38696e-19	AAEL013662	anterior fat body protein [Source:VB Community Annotation]
LOC5567883	2209.74	-1.63083	0.170322	-9.57499	1.01868e-21	2.73064e-19	AAEL006353	sulfotransferase (sult) [Source:VB Community Annotation]			GO:0008146	sulfotransferase activity
LOC5563570	289.767	1.71168	0.179038	9.5604	1.17298e-21	3.08602e-19	AAEL000024	dopachrome-conversion enzyme (DCE), putative [Source:VB Community Annotation]
LOC5574589	1248.31	-0.979934	0.103743	-9.4458	3.52705e-21	9.11068e-19	AAEL002432				GO:0016020,GO:0016021	membrane,integral component of membrane
LOC5567606	936.009	-1.34498	0.145694	-9.23155	2.66734e-20	6.76695e-18	AAEL006207
LOC5571612	254.133	2.19547	0.237963	9.22611	2.80646e-20	6.89371e-18	AAEL009206	organic cation transporter [Source:VB Community Annotation]			GO:0005215,GO:0016020,GO:0016021,GO:0022857,GO:0055085	transporter activity,membrane,integral component of membrane,transmembrane transporter activity,transmembrane transport
LOC5568677	18448.8	-1.53143	0.165995	-9.22581	2.81435e-20	6.89371e-18	AAEL007039	peptidoglycan recognition protein (short) [Source:VB Community Annotation]			GO:0002376,GO:0008270,GO:0008745,GO:0009253,GO:0042834,GO:0045087	immune system process,zinc ion binding,N-acetylmuramoyl-L-alanine amidase activity,peptidoglycan catabolic process,peptidoglycan binding,innate immune response
LOC5564166	415.79	-1.30083	0.142006	-9.16039	5.17104e-20	1.24517e-17	AAEL004126	sterol desaturase [Source:VB Community Annotation]			GO:0005506,GO:0008610,GO:0016020,GO:0016021,GO:0016491,GO:0055114	iron ion binding,lipid biosynthetic process,membrane,integral component of membrane,oxidoreductase activity,oxidation-reduction process
LOC110675609	491.857	1.35484	0.150009	9.0317	1.69024e-19	4.00221e-17	AAEL021795
LOC5569661	689.428	-1.829	0.20422	-8.95601	3.36637e-19	7.84033e-17	AAEL007816	cytochrome P450 [Source:VB Community Annotation]	CYP4D23		GO:0004497,GO:0005506,GO:0016491,GO:0016705,GO:0020037,GO:0046872,GO:0055114	monooxygenase activity,iron ion binding,oxidoreductase activity,oxidoreductase activity, acting on paired donors, with incorporation or reduction of molecular oxygen,heme binding,metal ion binding,oxidation-reduction process
LOC5571109	567.134	-1.73678	0.193987	-8.95305	3.45791e-19	7.92364e-17	AAEL001533	glucosyl/glucuronosyl transferases [Source:VB Community Annotation]			GO:0008194,GO:0015020,GO:0016020,GO:0016021,GO:0016740,GO:0016757,GO:0016758	UDP-glycosyltransferase activity,glucuronosyltransferase activity,membrane,integral component of membrane,transferase activity,transferase activity, transferring glycosyl groups,transferase activity, transferring hexosyl groups
LOC5570939	121.747	-2.58124	0.288632	-8.943	3.78737e-19	8.54081e-17	AAEL008664				GO:0003824	catalytic activity
LOC5572679	3887.64	-2.02103	0.228993	-8.82573	1.0875e-18	2.41408e-16	AAEL026174				GO:0005576,GO:0032367	extracellular region,intracellular cholesterol transport
LOC5579094	102.567	3.57026	0.406793	8.77659	1.68509e-18	3.68309e-16	AAEL003832	defensin anti-microbial peptide [Source:VB Community Annotation]	DEFC		GO:0002376,GO:0005576,GO:0006952,GO:0042742,GO:0045087	immune system process,extracellular region,defense response,defense response to bacterium,innate immune response
LOC5580223	226.65	-1.8029	0.205497	-8.77336	1.73419e-18	3.73298e-16	AAEL011922	serine-type enodpeptidase, [Source:VB Community Annotation]			GO:0004252,GO:0006508	serine-type endopeptidase activity,proteolysis
LOC5574949	250.686	-1.73802	0.199007	-8.73349	2.46934e-18	5.2361e-16	AAEL011555	metalloproteinase, putative [Source:VB Community Annotation]			GO:0004222,GO:0006508,GO:0008233,GO:0008237,GO:0008270,GO:0016787,GO:0046872	metalloendopeptidase activity,proteolysis,peptidase activity,metallopeptidase activity,zinc ion binding,hydrolase activity,metal ion binding
LOC5570267	5512.28	-2.08301	0.240653	-8.65565	4.90099e-18	1.02395e-15	AAEL008199	serine collagenase 1 precursor, putative [Source:VB Community Annotation]			GO:0004252,GO:0006508	serine-type endopeptidase activity,proteolysis
LOC5572468	396.391	-1.61867	0.187401	-8.6375	5.74582e-18	1.18306e-15	AAEL001833	juvenile hormone-inducible protein, putative [Source:VB Community Annotation]
LOC5570646	34013.7	-2.04436	0.238584	-8.56873	1.04635e-17	2.12364e-15	AAEL008451	alpha-amylase [Source:VB Community Annotation]			GO:0003824,GO:0004556,GO:0005975,GO:0008152,GO:0016787,GO:0016798,GO:0043169,GO:0046872,GO:0103025	catalytic activity,alpha-amylase activity,carbohydrate metabolic process,metabolic process,hydrolase activity,hydrolase activity, acting on glycosyl bonds,cation binding,metal ion binding,alpha-amylase activity (releasing maltohexaose)
LOC23687476	19331.6	-1.46688	0.171868	-8.53494	1.40222e-17	2.80583e-15	AAEL017056	Peptidoglycan Recognition Protein (Short) [Source:VB Community Annotation]	PGRPS4	PGRPS5
LOC5567015	13524.1	-1.21184	0.143268	-8.45861	2.70592e-17	5.33931e-15	AAEL005749	lysosomal alpha-mannosidase (mannosidase alpha class 2b member 1) [Source:VB Community Annotation]			GO:0003824,GO:0004559,GO:0005975,GO:0006013,GO:0008152,GO:0016787,GO:0016798,GO:0030246,GO:0046872	catalytic activity,alpha-mannosidase activity,carbohydrate metabolic process,mannose metabolic process,metabolic process,hydrolase activity,hydrolase activity, acting on glycosyl bonds,carbohydrate binding,metal ion binding
LOC5571589	1704.46	-2.09765	0.250201	-8.38388	5.12108e-17	9.96647e-15	AAEL009176	Gram-Negative Binding Protein (GNBP) or Beta-1 3-Glucan Binding Protein (BGBP). [Source:VB Community Annotation]	GNBPB3		GO:0004553,GO:0005975	hydrolase activity, hydrolyzing O-glycosyl compounds,carbohydrate metabolic process
LOC110675990	812.551	2.56901	0.307316	8.35952	6.2972e-17	1.20898e-14	AAEL020833
LOC23687711	211.213	-2.88131	0.344778	-8.35702	6.4325e-17	1.21849e-14	AAEL023132				GO:0003676,GO:0004806,GO:0005576,GO:0006629,GO:0008270,GO:0008970,GO:0052689	nucleic acid binding,triglyceride lipase activity,extracellular region,lipid metabolic process,zinc ion binding,phospholipase A1 activity,carboxylic ester hydrolase activity
LOC5569553	2906.47	0.930584	0.112698	8.25729	1.49013e-16	2.78556e-14	AAEL007758				GO:0016020,GO:0016021	membrane,integral component of membrane
LOC5578692	1243.3	1.05351	0.127984	8.23158	1.84763e-16	3.409e-14	AAEL022578	Clip-domain serine protease [Source:UniProtKB/TrEMBL;Acc:Q1HQI3]			GO:0004252,GO:0005576,GO:0006508,GO:0008233,GO:0008236,GO:0016787	serine-type endopeptidase activity,extracellular region,proteolysis,peptidase activity,serine-type peptidase activity,hydrolase activity
LOC5570261	580.106	-1.34045	0.163465	-8.20024	2.39911e-16	4.36977e-14	AAEL023597				GO:0004252,GO:0006508	serine-type endopeptidase activity,proteolysis
LOC5569806	2934.28	1.4036	0.171278	8.19489	2.50826e-16	4.51074e-14	AAEL001294
LOC5568623	324.669	2.08283	0.255619	8.14818	3.69455e-16	6.56105e-14	AAEL006971				GO:0030246	carbohydrate binding
LOC5577707	70.6249	3.34357	0.410783	8.13952	3.9686e-16	6.96072e-14	AAEL013350	heat shock protein 26kD, putative [Source:VB Community Annotation]			GO:0046872	metal ion binding
LOC5570858	1325.71	-0.890435	0.110164	-8.0828	6.32972e-16	1.09666e-13	AAEL008635	ABC transporter [Source:VB Community Annotation]			GO:0000166,GO:0005524,GO:0016020,GO:0016021,GO:0016887,GO:0042626	nucleotide binding,ATP binding,membrane,integral component of membrane,ATPase activity,ATPase-coupled transmembrane transporter activity
LOC5569492	1466.83	-1.60462	0.198891	-8.06783	7.15568e-16	1.22483e-13	AAEL026011				GO:0003824,GO:0004556,GO:0005975,GO:0008152,GO:0016787,GO:0016798,GO:0043169,GO:0046872,GO:0103025	catalytic activity,alpha-amylase activity,carbohydrate metabolic process,metabolic process,hydrolase activity,hydrolase activity, acting on glycosyl bonds,cation binding,metal ion binding,alpha-amylase activity (releasing maltohexaose)
LOC5568362	1979.91	1.02231	0.127032	8.04765	8.43972e-16	1.42742e-13	AAEL001098	clip-domain serine protease, putative [Source:VB Community Annotation]			GO:0004252,GO:0006508	serine-type endopeptidase activity,proteolysis
LOC5579417	4859.96	1.72454	0.214421	8.04274	8.78527e-16	1.46838e-13	AAEL015458	transferrin [Source:VB Community Annotation]	Tf1		GO:0005576,GO:0005615,GO:0006811,GO:0046872,GO:0055072	extracellular region,extracellular space,ion transport,metal ion binding,iron ion homeostasis
LOC5573150	3869.13	0.999169	0.124447	8.02886	9.83794e-16	1.6252e-13	AAEL002029	protein serine/threonine kinase, putative [Source:VB Community Annotation]
LOC110675453	50.3913	5.71661	0.712793	8.02002	1.0573e-15	1.72657e-13	AAEL026690
LOC5570402	41.6629	-4.68945	0.584901	-8.0175	1.07917e-15	1.74225e-13	AAEL021032
LOC5577161	137.025	-2.09823	0.263247	-7.97059	1.57913e-15	2.52075e-13	AAEL019602				GO:0016020,GO:0016021	membrane,integral component of membrane
LOC5576220	3257.59	0.872463	0.109492	7.96832	1.60849e-15	2.5391e-13	AAEL002834	myo-inositol-1 phosphate synthase [Source:VB Community Annotation]			GO:0004512,GO:0006021,GO:0008654,GO:0016853	inositol-3-phosphate synthase activity,inositol biosynthetic process,phospholipid biosynthetic process,isomerase activity
LOC5576310	886.87	-1.13107	0.142155	-7.95663	1.7679e-15	2.76006e-13	AAEL012457	alcohol dehydrogenase [Source:VB Community Annotation]			GO:0005737,GO:0006693,GO:0016491,GO:0032440,GO:0036132,GO:0047522,GO:0055114	cytoplasm,prostaglandin metabolic process,oxidoreductase activity,2-alkenal reductase [NAD(P)+] activity,13-prostaglandin reductase activity,15-oxoprostaglandin 13-oxidase activity,oxidation-reduction process
LOC110679082	298.621	-1.54647	0.195866	-7.89556	2.89021e-15	4.46318e-13	AAEL026999
LOC5576141	210.508	-1.59885	0.203156	-7.87005	3.54485e-15	5.41524e-13	AAEL023423				GO:0000166,GO:0004672,GO:0004674,GO:0005524,GO:0006468	nucleotide binding,protein kinase activity,protein serine/threonine kinase activity,ATP binding,protein phosphorylation
LOC5579192	548.918	0.932924	0.118655	7.86248	3.76609e-15	5.692e-13	AAEL003889	Gram-Negative Binding Protein (GNBP) or Beta-1 3-Glucan Binding Protein (BGBP). [Source:VB Community Annotation]	GNBPB1		GO:0004553,GO:0005975	hydrolase activity, hydrolyzing O-glycosyl compounds,carbohydrate metabolic process
LOC110677067	5207.21	2.14534	0.273207	7.85244	4.08026e-15	6.10192e-13	AAEL024249
LOC5563616	2270.65	0.873294	0.112143	7.78735	6.84272e-15	1.01265e-12	AAEL000028	Clip-Domain Serine Protease family B. [Source:VB Community Annotation]	CLIPB34		GO:0004252,GO:0005576,GO:0006508,GO:0008233,GO:0008236,GO:0016787	serine-type endopeptidase activity,extracellular region,proteolysis,peptidase activity,serine-type peptidase activity,hydrolase activity
LOC5573301	320.691	1.51519	0.194749	7.78024	7.23889e-15	1.06024e-12	AAEL010397
LOC5573923	356.355	2.46741	0.317405	7.77369	7.62318e-15	1.10513e-12	AAEL002246	cuticle protein, putative [Source:VB Community Annotation]
LOC110678498	2081.11	-1.46872	0.189074	-7.76798	7.97458e-15	1.14439e-12	AAEL022214	Putative gamma-interferon inducible lysosomal thiol reductase [Source:UniProtKB/TrEMBL;Acc:A0A0P6IX56]
LOC5569637	569.695	1.01716	0.131068	7.7606	8.45273e-15	1.20088e-12	AAEL007778	leucine-rich transmembrane protein [Source:VB Community Annotation]			GO:0005515,GO:0016020,GO:0016021	protein binding,membrane,integral component of membrane
LOC5569611	3443.08	1.59331	0.205528	7.75231	9.02328e-15	1.26924e-12	AAEL001278
LOC110678811	127.409	1.7387	0.224499	7.74478	9.57502e-15	1.33365e-12	AAEL026802
LOC23687487	1881.49	-1.93568	0.250494	-7.72744	1.09735e-14	1.51359e-12	AAEL017067				GO:0004190,GO:0005576,GO:0006508,GO:0008061,GO:0016787	aspartic-type endopeptidase activity,extracellular region,proteolysis,chitin binding,hydrolase activity
LOC5575509	9881.05	-1.70303	0.220813	-7.71251	1.23366e-14	1.68525e-12	AAEL011889	serine-type enodpeptidase, [Source:VB Community Annotation]			GO:0004252,GO:0006508,GO:0008233,GO:0008236,GO:0016787	serine-type endopeptidase activity,proteolysis,peptidase activity,serine-type peptidase activity,hydrolase activity
LOC5565795	755.101	1.09047	0.142024	7.67802	1.61567e-14	2.18608e-12	AAEL020823				GO:0004867,GO:0005615,GO:0010466,GO:0010951,GO:0030414	serine-type endopeptidase inhibitor activity,extracellular space,negative regulation of peptidase activity,negative regulation of endopeptidase activity,peptidase inhibitor activity
LOC5570810	6246.42	-0.991047	0.130353	-7.60279	2.89817e-14	3.88437e-12	AAEL008574	acyl-CoA oxidase [Source:VB Community Annotation]			GO:0003997,GO:0005777,GO:0006629,GO:0006631,GO:0006635,GO:0016491,GO:0016627,GO:0050660,GO:0055114,GO:0071949	acyl-CoA oxidase activity,peroxisome,lipid metabolic process,fatty acid metabolic process,fatty acid beta-oxidation,oxidoreductase activity,oxidoreductase activity, acting on the CH-CH group of donors,flavin adenine dinucleotide binding,oxidation-reduction process,FAD binding
LOC5566850	4658.3	1.13986	0.150752	7.56121	3.99327e-14	5.30209e-12	AAEL000801	metalloproteinase, putative [Source:VB Community Annotation]			GO:0004222,GO:0006508,GO:0008233,GO:0008237,GO:0008270,GO:0016787,GO:0046872	metalloendopeptidase activity,proteolysis,peptidase activity,metallopeptidase activity,zinc ion binding,hydrolase activity,metal ion binding
LOC23687564	381.269	2.38541	0.317045	7.52387	5.3177e-14	6.99524e-12	AAEL017144
LOC110678441	1367.34	-1.55056	0.206265	-7.5173	5.59193e-14	7.28849e-12	AAEL022566
LOC5576791	73.4931	-2.12603	0.283154	-7.5084	5.98536e-14	7.73037e-12	AAEL022651
LOC5575510	952.658	-1.39607	0.186175	-7.49869	6.44572e-14	8.24994e-12	AAEL011891	serine-type enodpeptidase, [Source:VB Community Annotation]			GO:0004252,GO:0006508,GO:0008233,GO:0008236,GO:0016787	serine-type endopeptidase activity,proteolysis,peptidase activity,serine-type peptidase activity,hydrolase activity
LOC5579508	1084.17	-1.60314	0.214425	-7.47646	7.63517e-14	9.68508e-12	AAEL015139	Niemann-Pick Type C-2, putative [Source:VB Community Annotation]
LOC5578646	1365.21	-1.41477	0.189726	-7.45694	8.8556e-14	1.11338e-11	AAEL013798	cytochrome P450 [Source:VB Community Annotation]	CYP4H33		GO:0004497,GO:0005506,GO:0016491,GO:0016705,GO:0020037,GO:0046872,GO:0055114	monooxygenase activity,iron ion binding,oxidoreductase activity,oxidoreductase activity, acting on paired donors, with incorporation or reduction of molecular oxygen,heme binding,metal ion binding,oxidation-reduction process
LOC5572143	1565.53	-1.58741	0.212934	-7.45496	8.98919e-14	1.12026e-11	AAEL009556	Niemann-Pick Type C-2, putative [Source:VB Community Annotation]			GO:0005576,GO:0005623,GO:0032367	extracellular region,obsolete cell,intracellular cholesterol transport
LOC5573917	1186.59	2.61688	0.351609	7.44257	9.87429e-14	1.21986e-11	AAEL002241	cuticle protein, putative [Source:VB Community Annotation]
LOC5576614	555.717	1.9394	0.261326	7.4214	1.1589e-13	1.41936e-11	AAEL012639
LOC5575668	5803.9	-0.842236	0.113848	-7.39789	1.38367e-13	1.68015e-11	AAEL002687	sterol carrier protein-2, putative [Source:VB Community Annotation]			GO:0003824,GO:0005737,GO:0005739,GO:0005777,GO:0006869,GO:0008289,GO:0016740,GO:0016746,GO:0016747,GO:0033814,GO:0050632	catalytic activity,cytoplasm,mitochondrion,peroxisome,lipid transport,lipid binding,transferase activity,transferase activity, transferring acyl groups,transferase activity, transferring acyl groups other than amino-acyl groups,propanoyl-CoA C-acyltransferase activity,propionyl-CoA C2-trimethyltridecanoyltransferase activity
LOC5563725	2209.9	0.702376	0.0954777	7.35644	1.88886e-13	2.27416e-11	AAEL014078	serine protease inhibitor, serpin [Source:VB Community Annotation]			GO:0004867,GO:0005615,GO:0010466,GO:0010951,GO:0030414	serine-type endopeptidase inhibitor activity,extracellular space,negative regulation of peptidase activity,negative regulation of endopeptidase activity,peptidase inhibitor activity
LOC110680238	752.978	-1.89618	0.258131	-7.34581	2.04512e-13	2.44159e-11	AAEL022879				GO:0004553,GO:0005975	hydrolase activity, hydrolyzing O-glycosyl compounds,carbohydrate metabolic process
LOC5579954	63475.9	-1.29324	0.176919	-7.3098	2.67546e-13	3.16752e-11	AAEL007591
LOC23687652	4569.69	2.37156	0.325634	7.28292	3.26676e-13	3.83561e-11	AAEL017232
LOC5579955	26695.6	-1.53971	0.211563	-7.27782	3.39267e-13	3.95079e-11	AAEL007592
LOC5576737	2250.21	-0.934789	0.12901	-7.24588	4.29634e-13	4.96245e-11	AAEL002978	leucyl aminopeptidase, putative [Source:VB Community Annotation]			GO:0004177,GO:0005737,GO:0006508,GO:0008233,GO:0008235,GO:0016787,GO:0019538,GO:0030145,GO:0070006	aminopeptidase activity,cytoplasm,proteolysis,peptidase activity,metalloexopeptidase activity,hydrolase activity,protein metabolic process,manganese ion binding,metalloaminopeptidase activity
LOC110677976	34.3213	-5.00472	0.694621	-7.20496	5.80592e-13	6.60331e-11	AAEL020275
LOC5574467	46.6612	-2.65814	0.368936	-7.20487	5.80991e-13	6.60331e-11	AAEL002373	juvenile hormone-inducible protein, putative [Source:VB Community Annotation]
LOC110675607	46391.3	-1.48682	0.207381	-7.16951	7.52649e-13	8.48641e-11	AAEL020585
LOC110679707	1579.9	0.757392	0.105874	7.15371	8.44664e-13	9.44893e-11	AAEL019767				GO:0004252,GO:0006508	serine-type endopeptidase activity,proteolysis
LOC110675466	3214.09	1.81187	0.253469	7.14829	8.7864e-13	9.75222e-11	AAEL025945				GO:0042302	structural constituent of cuticle
LOC5568498	2515.02	-0.734656	0.102891	-7.14013	9.32456e-13	1.02693e-10	AAEL006912	acetyl-coa acetyltransferase 2, [Source:VB Community Annotation]			GO:0003824,GO:0016740,GO:0016746,GO:0016747	catalytic activity,transferase activity,transferase activity, transferring acyl groups,transferase activity, transferring acyl groups other than amino-acyl groups
LOC5573912	715.343	2.90424	0.408189	7.11495	1.11956e-12	1.2235e-10	AAEL025678
LOC5573277	908.418	0.845664	0.119132	7.09855	1.26071e-12	1.36724e-10	AAEL010379	ATP-binding cassette transporter [Source:VB Community Annotation]			GO:0000166,GO:0005524,GO:0016020,GO:0016021,GO:0016887,GO:0042626,GO:0055085	nucleotide binding,ATP binding,membrane,integral component of membrane,ATPase activity,ATPase-coupled transmembrane transporter activity,transmembrane transport
LOC5575270	599.211	1.2521	0.176444	7.09629	1.28148e-12	1.37924e-10	AAEL011740				GO:0005515	protein binding
LOC5576509	7543.07	-1.5066	0.212621	-7.08584	1.38199e-12	1.47624e-10	AAEL012564	lumbrokinase-3(1) precursor, putative [Source:VB Community Annotation]			GO:0004252,GO:0006508	serine-type endopeptidase activity,proteolysis
LOC110677065	7257.18	1.70655	0.24089	7.08433	1.39721e-12	1.48135e-10	AAEL025172
LOC5567661	46.8957	2.84543	0.402161	7.07534	1.49079e-12	1.56886e-10	AAEL023949				GO:0004497,GO:0005506,GO:0016491,GO:0016705,GO:0020037,GO:0046872,GO:0055114	monooxygenase activity,iron ion binding,oxidoreductase activity,oxidoreductase activity, acting on paired donors, with incorporation or reduction of molecular oxygen,heme binding,metal ion binding,oxidation-reduction process
LOC5580222	1011.79	-1.12555	0.159419	-7.06032	1.66118e-12	1.73038e-10	AAEL011920	serine-type enodpeptidase, [Source:VB Community Annotation]			GO:0004252,GO:0006508	serine-type endopeptidase activity,proteolysis
LOC5576510	1317.51	-1.44293	0.20439	-7.0597	1.66863e-12	1.73038e-10	AAEL012559	serine collagenase 1 precursor, putative [Source:VB Community Annotation]			GO:0004252,GO:0006508	serine-type endopeptidase activity,proteolysis
LOC5574170	254.719	1.34308	0.191208	7.02419	2.15319e-12	2.2167e-10	AAEL002301	serine protease [Source:VB Community Annotation]			GO:0004252,GO:0006508	serine-type endopeptidase activity,proteolysis
LOC5563566	1017.94	1.08293	0.154477	7.0103	2.37811e-12	2.43064e-10	AAEL000074	Clip-Domain Serine Protease family B. [Source:VB Community Annotation]	CLIPB1		GO:0004252,GO:0005576,GO:0006508,GO:0008233,GO:0008236,GO:0016787	serine-type endopeptidase activity,extracellular region,proteolysis,peptidase activity,serine-type peptidase activity,hydrolase activity
LOC110680964	33.6715	5.38354	0.768414	7.00605	2.45147e-12	2.48771e-10	AAEL020853
LOC110676874	100.364	-4.03838	0.579854	-6.96448	3.29616e-12	3.32117e-10	AAEL027210
EGFP	5986.41	-1.30576	0.187839	-6.95149	3.61452e-12	3.61631e-10
LOC110680953	693.881	-1.47397	0.212091	-6.94968	3.66116e-12	3.62738e-10	AAEL026687
LOC5575343	1794.6	1.90945	0.274778	6.94908	3.67666e-12	3.62738e-10	AAEL002617	odorant binding protein OBP12 [Source:VB Community Annotation]	OBP12		GO:0005549	odorant binding
LOC5570266	212.35	-1.61435	0.233892	-6.9021	5.12394e-12	5.0204e-10	AAEL008206	serine-type enodpeptidase, [Source:VB Community Annotation]			GO:0004252,GO:0006508,GO:0008233,GO:0008236,GO:0016787	serine-type endopeptidase activity,proteolysis,peptidase activity,serine-type peptidase activity,hydrolase activity
LOC5567637	2454.53	-0.894851	0.130177	-6.87408	6.23892e-12	6.07098e-10	AAEL006224	short-chain dehydrogenase [Source:VB Community Annotation]			GO:0016491,GO:0055114	oxidoreductase activity,oxidation-reduction process
LOC5570260	3862.94	-1.36299	0.198311	-6.87299	6.28713e-12	6.07627e-10	AAEL008207	serine protease [Source:VB Community Annotation]			GO:0004252,GO:0006508,GO:0008233,GO:0008236,GO:0016787	serine-type endopeptidase activity,proteolysis,peptidase activity,serine-type peptidase activity,hydrolase activity
LOC5569031	207.24	1.23457	0.180369	6.84472	7.66232e-12	7.35531e-10	AAEL019714				GO:0016020,GO:0016021	membrane,integral component of membrane
LOC5567081	600.76	-1.154	0.168754	-6.83834	8.01171e-12	7.63909e-10	AAEL005808	alanyl aminopeptidase [Source:VB Community Annotation]			GO:0004177,GO:0006508,GO:0008233,GO:0008237,GO:0008270,GO:0016020,GO:0016021,GO:0016787,GO:0046872	aminopeptidase activity,proteolysis,peptidase activity,metallopeptidase activity,zinc ion binding,membrane,integral component of membrane,hydrolase activity,metal ion binding
LOC110678614	132.101	-3.2953	0.484946	-6.7952	1.08163e-11	1.02039e-09	AAEL022779
LOC5578897	437.177	-1.54074	0.226752	-6.79481	1.08453e-11	1.02039e-09	AAEL026458				GO:0006508,GO:0008233,GO:0008237,GO:0008270,GO:0016787,GO:0046872	proteolysis,peptidase activity,metallopeptidase activity,zinc ion binding,hydrolase activity,metal ion binding
LOC110674341	52313.6	1.2508	0.184348	6.78499	1.16092e-11	1.08095e-09	AAEL025723
LOC5569818	413.683	-1.65771	0.244335	-6.7846	1.16411e-11	1.08095e-09	AAEL025053
LOC110679824	56.3911	2.44599	0.360707	6.78111	1.19253e-11	1.10015e-09	AAEL021929
LOC110679654	43.2822	-4.74118	0.70232	-6.75074	1.47095e-11	1.34824e-09	AAEL021163
LOC5578132	1862.02	0.90239	0.134032	6.73263	1.66623e-11	1.51745e-09	AAEL013517	pupal cuticle protein 78E, putative [Source:VB Community Annotation]			GO:0042302	structural constituent of cuticle
LOC5569816	460.639	-1.37202	0.203953	-6.72715	1.7302e-11	1.56567e-09	AAEL001307	SEC14, putative [Source:VB Community Annotation]
LOC5573677	178.228	-1.80347	0.268127	-6.72616	1.74203e-11	1.56639e-09	AAEL010656	leucine-rich immune protein (Short) [Source:VB Community Annotation]	LRIM12		GO:0005515	protein binding
LOC5575814	551.496	1.49201	0.222394	6.70885	1.96169e-11	1.75281e-09	AAEL012086	leucine-rich immune protein (Long) [Source:VB Community Annotation]	LRIM1		GO:0005515	protein binding
LOC5565630	758.219	0.938997	0.140118	6.70149	2.06307e-11	1.83188e-09	AAEL014909
LOC110676984	256.205	-1.08613	0.1623	-6.69209	2.20009e-11	1.94141e-09	AAEL010348	sugar transporter [Source:VB Community Annotation]			GO:0016020,GO:0016021,GO:0022857,GO:0055085	membrane,integral component of membrane,transmembrane transporter activity,transmembrane transport
LOC5577890	207.573	1.29389	0.193998	6.66962	2.56472e-11	2.2492e-09	AAEL013406	venom allergen [Source:VB Community Annotation]			GO:0005576	extracellular region
LOC5568186	79.4219	-5.82724	0.875297	-6.65744	2.78631e-11	2.42854e-09	AAEL006623				GO:0005576,GO:0008061	extracellular region,chitin binding
LOC5576648	1083.5	-1.17376	0.176371	-6.65503	2.83237e-11	2.45363e-09	AAEL012674	d-amino acid oxidase [Source:VB Community Annotation]			GO:0003884,GO:0016491,GO:0046416,GO:0055114,GO:0071949	D-amino-acid oxidase activity,oxidoreductase activity,D-amino acid metabolic process,oxidation-reduction process,FAD binding
LOC110674291	26.8208	5.38248	0.814032	6.61212	3.78859e-11	3.26209e-09	AAEL022820
LOC5566735	6526.3	-1.07418	0.162764	-6.59962	4.12202e-11	3.52781e-09	AAEL005594				GO:0004252,GO:0006508,GO:0008233,GO:0008236,GO:0016787	serine-type endopeptidase activity,proteolysis,peptidase activity,serine-type peptidase activity,hydrolase activity
LOC5577596	888.488	1.03498	0.1569	6.59646	4.211e-11	3.58238e-09	AAEL003266				GO:0042302	structural constituent of cuticle
LOC110681162	226.96	1.40934	0.213938	6.58763	4.4691e-11	3.75696e-09	AAEL026805
LOC5575634	226.96	1.40934	0.213938	6.58763	4.4691e-11	3.75696e-09	AAEL026805
LOC5563939	3955.28	1.59596	0.242455	6.58249	4.62638e-11	3.85848e-09	AAEL014241
LOC5566734	4432.45	-1.18264	0.179681	-6.58192	4.64419e-11	3.85848e-09	AAEL005611	trypsin [Source:VB Community Annotation]			GO:0004252,GO:0006508,GO:0008233,GO:0008236,GO:0016787	serine-type endopeptidase activity,proteolysis,peptidase activity,serine-type peptidase activity,hydrolase activity
LOC5575907	593.358	-1.14948	0.175373	-6.55447	5.58404e-11	4.61235e-09	AAEL012153				GO:0016020,GO:0016021	membrane,integral component of membrane
LOC5574534	1074.42	-1.38693	0.212272	-6.53376	6.41402e-11	5.26728e-09	AAEL011210				GO:0016020,GO:0016021	membrane,integral component of membrane
LOC5571939	2989.52	-1.22814	0.188896	-6.50167	7.94345e-11	6.4543e-09	AAEL009420	Class B Scavenger Receptor (CD36 domain). [Source:VB Community Annotation]	SCRBQ1		GO:0005886,GO:0016020,GO:0016021	plasma membrane,membrane,integral component of membrane
LOC5563863	107.589	2.09697	0.322535	6.50154	7.95032e-11	6.4543e-09	AAEL003983	adenylate cyclase [Source:VB Community Annotation]			GO:0016020,GO:0016021,GO:0022857,GO:0055085	membrane,integral component of membrane,transmembrane transporter activity,transmembrane transport
LOC110676965	35.6181	3.03986	0.467664	6.50009	8.02709e-11	6.45527e-09	AAEL026917				GO:0003677,GO:0046983	DNA binding,protein dimerization activity
LOC5570922	936.116	-1.18706	0.18263	-6.49981	8.04239e-11	6.45527e-09	AAEL001503	sodium/hydrogen exchanger 3 (nhe3) [Source:VB Community Annotation]			GO:0006811,GO:0006812,GO:0006814,GO:0006885,GO:0015297,GO:0015299,GO:0015385,GO:0016020,GO:0016021,GO:0035725,GO:0055085,GO:1902600	ion transport,cation transport,sodium ion transport,regulation of pH,antiporter activity,solute:proton antiporter activity,sodium:proton antiporter activity,membrane,integral component of membrane,sodium ion transmembrane transport,transmembrane transport,proton transmembrane transport
LOC5578130	24147.9	1.53512	0.236694	6.48567	8.83405e-11	7.05086e-09	AAEL013512	pupal cuticle protein, putative [Source:VB Community Annotation]			GO:0042302	structural constituent of cuticle
LOC5569826	3671.47	-1.48872	0.230016	-6.47223	9.65649e-11	7.66423e-09	AAEL001301
LOC5568583	18018.9	-0.962142	0.148839	-6.46431	1.01761e-10	8.03174e-09	AAEL001113	inorganic phosphate cotransporter, putative [Source:VB Community Annotation]			GO:0016020,GO:0016021,GO:0022857,GO:0055085	membrane,integral component of membrane,transmembrane transporter activity,transmembrane transport
LOC110681124	88.5737	-2.11888	0.328319	-6.45373	1.09129e-10	8.56573e-09	AAEL021498	Carboxylic ester hydrolase (Fragment) [Source:UniProtKB/TrEMBL;Acc:Q17G43]			GO:0016787,GO:0052689	hydrolase activity,carboxylic ester hydrolase activity
LOC5566122	178.823	-1.34327	0.208215	-6.45136	1.10849e-10	8.65289e-09	AAEL005177	adenylate cyclase [Source:VB Community Annotation]			GO:0000166,GO:0004016,GO:0005524,GO:0005886,GO:0006171,GO:0009190,GO:0016020,GO:0016829,GO:0016849,GO:0035556,GO:0046872	nucleotide binding,adenylate cyclase activity,ATP binding,plasma membrane,cAMP biosynthetic process,cyclic nucleotide biosynthetic process,membrane,lyase activity,phosphorus-oxygen lyase activity,intracellular signal transduction,metal ion binding
LOC5568450	1503.27	0.777867	0.120799	6.43936	1.19981e-10	9.31456e-09	AAEL006863				GO:0016020,GO:0016021	membrane,integral component of membrane
LOC5571788	3336.05	-1.18017	0.183423	-6.43413	1.24184e-10	9.58852e-09	AAEL027166				GO:0006508,GO:0008237,GO:0008241,GO:0016020	proteolysis,metallopeptidase activity,peptidyl-dipeptidase activity,membrane
LOC5570898	382.068	-1.21059	0.188684	-6.41595	1.39951e-10	1.07475e-08	AAEL001478	bile acid beta-glucosidase, putative [Source:VB Community Annotation]			GO:0003824,GO:0004348,GO:0004553,GO:0005975,GO:0006680,GO:0016020	catalytic activity,glucosylceramidase activity,hydrolase activity, hydrolyzing O-glycosyl compounds,carbohydrate metabolic process,glucosylceramide catabolic process,membrane
LOC5564917	170.298	-1.37847	0.215254	-6.40391	1.51445e-10	1.15676e-08	AAEL026744				GO:0004197,GO:0006508,GO:0006915,GO:0008233,GO:0008234,GO:0016787	cysteine-type endopeptidase activity,proteolysis,apoptotic process,peptidase activity,cysteine-type peptidase activity,hydrolase activity
LOC110680480	88.4012	-2.13391	0.335363	-6.36298	1.97875e-10	1.50332e-08	AAEL020734	Carboxylic ester hydrolase (Fragment) [Source:UniProtKB/TrEMBL;Acc:Q17G43]
LOC5576618	9870.32	1.53383	0.241319	6.35605	2.0701e-10	1.56435e-08	AAEL012652				GO:0005576,GO:0006030,GO:0008061	extracellular region,chitin metabolic process,chitin binding
LOC5576988	1826.73	0.830391	0.13076	6.3505	2.14619e-10	1.61328e-08	AAEL003067
LOC23687956	10478.7	1.29561	0.204203	6.34472	2.22825e-10	1.65879e-08	AAEL017536	holotricin glycine rich repeat protein (GRRP) anti-microbial peptide [Source:VB Community Annotation]	GRRP
LOC5569665	1236.54	-0.838334	0.132134	-6.3446	2.23008e-10	1.65879e-08	AAEL007815	cytochrome P450 [Source:VB Community Annotation]	CYP4D24		GO:0004497,GO:0005506,GO:0016491,GO:0016705,GO:0020037,GO:0046872,GO:0055114	monooxygenase activity,iron ion binding,oxidoreductase activity,oxidoreductase activity, acting on paired donors, with incorporation or reduction of molecular oxygen,heme binding,metal ion binding,oxidation-reduction process
LOC5573776	3632.94	-1.00819	0.159054	-6.33865	2.31792e-10	1.71514e-08	AAEL000271	gamma-glutamyl hydrolase [Source:VB Community Annotation]			GO:0005576,GO:0005615,GO:0006508,GO:0008242,GO:0016787,GO:0034722	extracellular region,extracellular space,proteolysis,omega peptidase activity,hydrolase activity,gamma-glutamyl-peptidase activity
LOC5568166	1746.78	0.915412	0.144599	6.3307	2.44056e-10	1.79653e-08	AAEL006609	zinc finger protein [Source:VB Community Annotation]			GO:0003676	nucleic acid binding
LOC110678544	46.534	-2.39205	0.378176	-6.32525	2.52825e-10	1.85149e-08	AAEL026924
LOC5575654	2124.21	0.863512	0.136839	6.31043	2.78256e-10	2.02727e-08	AAEL011973	fumarylacetoacetate hydrolase [Source:VB Community Annotation]			GO:0003824,GO:0004334,GO:0005829,GO:0006559,GO:0006572,GO:0009072,GO:0016787,GO:0046872,GO:1902000	catalytic activity,fumarylacetoacetase activity,cytosol,L-phenylalanine catabolic process,tyrosine catabolic process,aromatic amino acid family metabolic process,hydrolase activity,metal ion binding,homogentisate catabolic process
LOC5567358	1370.72	-1.3188	0.20999	-6.28032	3.37873e-10	2.44906e-08	AAEL006023	Vanin-like protein 1 precursor, putative [Source:VB Community Annotation]			GO:0006807,GO:0016020,GO:0016021,GO:0016787,GO:0016811	nitrogen compound metabolic process,membrane,integral component of membrane,hydrolase activity,hydrolase activity, acting on carbon-nitrogen (but not peptide) bonds, in linear amides
LOC5570135	3028.85	0.891178	0.142197	6.26721	3.67585e-10	2.65091e-08	AAEL008106
LOC5573149	1931.25	0.901141	0.143997	6.25806	3.89785e-10	2.79681e-08	AAEL001995	protein serine/threonine kinase, putative [Source:VB Community Annotation]
LOC5568622	587.627	1.95251	0.312571	6.24663	4.19401e-10	2.99419e-08	AAEL006968				GO:0030246	carbohydrate binding
LOC5567546	234.046	1.36531	0.218861	6.23826	4.42468e-10	3.14307e-08	AAEL006131
LOC5568044	139.476	-1.97086	0.316224	-6.23248	4.59117e-10	3.24511e-08	AAEL006485	inosine-uridine preferring nucleoside hydrolase [Source:VB Community Annotation]			GO:0016787	hydrolase activity
LOC5577665	473.158	1.23417	0.198232	6.22591	4.78775e-10	3.3673e-08	AAEL019590				GO:0004252,GO:0006508	serine-type endopeptidase activity,proteolysis
LOC5573070	44.8104	-3.16798	0.509208	-6.22139	4.92783e-10	3.44875e-08	AAEL022986				GO:0005515	protein binding
LOC5563609	188.463	1.3143	0.212012	6.19917	5.67624e-10	3.95305e-08	AAEL000087	macroglobulin/complement [Source:VB Community Annotation]			GO:0004866,GO:0005576,GO:0005615,GO:0010951	endopeptidase inhibitor activity,extracellular region,extracellular space,negative regulation of endopeptidase activity
LOC5568346	1125.3	-1.39378	0.225438	-6.18256	6.30707e-10	4.37095e-08	AAEL001054	glutathione S-transferase (GSTD4) [Source:VB Community Annotation]	GSTD4		GO:0005515,GO:0016740	protein binding,transferase activity
LOC110677072	416.984	2.62555	0.425565	6.16956	6.84793e-10	4.72275e-08	AAEL020818
LOC5569755	719.5	-0.813851	0.131988	-6.16612	6.99867e-10	4.80339e-08	AAEL007892	xaa-pro aminopeptidase [Source:VB Community Annotation]			GO:0006508,GO:0016787,GO:0046872,GO:0070006	proteolysis,hydrolase activity,metal ion binding,metalloaminopeptidase activity
LOC5567252	184.567	-6.87104	1.11713	-6.15063	7.71757e-10	5.27133e-08	AAEL026421
LOC5563695	900.652	0.7158	0.116707	6.13329	8.60776e-10	5.85122e-08	AAEL000549	fibulin 1 and [Source:VB Community Annotation]			GO:0005509,GO:0005515,GO:0016504,GO:0030198,GO:0062023	calcium ion binding,protein binding,peptidase activator activity,extracellular matrix organization,collagen-containing extracellular matrix
LOC23687789	32.1839	-4.29033	0.700341	-6.12607	9.00789e-10	6.09405e-08	AAEL023387
LOC5571543	1947.54	-1.1277	0.184604	-6.10878	1.00396e-09	6.75983e-08	AAEL009131	cytochrome P450 [Source:VB Community Annotation]	CYP6Z8		GO:0004497,GO:0005506,GO:0016491,GO:0016705,GO:0020037,GO:0046872,GO:0055114	monooxygenase activity,iron ion binding,oxidoreductase activity,oxidoreductase activity, acting on paired donors, with incorporation or reduction of molecular oxygen,heme binding,metal ion binding,oxidation-reduction process
LOC5563663	210.386	1.79503	0.293918	6.10724	1.01369e-09	6.79317e-08	AAEL000037	Clip-Domain Serine Protease family B. [Source:VB Community Annotation]	CLIPB35		GO:0004252,GO:0005576,GO:0006508,GO:0008233,GO:0008236,GO:0016787	serine-type endopeptidase activity,extracellular region,proteolysis,peptidase activity,serine-type peptidase activity,hydrolase activity
LOC110676887	501.021	-1.99444	0.326794	-6.10305	1.04064e-09	6.94099e-08	AAEL020366
LOC5577763	5440.49	-3.4045	0.558731	-6.09327	1.10629e-09	7.34443e-08	AAEL003317	alkaline phosphatase [Source:VB Community Annotation]			GO:0003824,GO:0004035,GO:0016311,GO:0016787,GO:0016791,GO:0031225	catalytic activity,alkaline phosphatase activity,dephosphorylation,hydrolase activity,phosphatase activity,anchored component of membrane
LOC110676958	20.2009	-7.72469	1.27074	-6.07892	1.20998e-09	7.99546e-08	AAEL023367
LOC5577712	30.7509	3.8083	0.627405	6.06992	1.27971e-09	8.39604e-08	AAEL013345	alphaA-crystallin, putative [Source:VB Community Annotation]			GO:0046872	metal ion binding
LOC5576604	560.272	-1.2992	0.214051	-6.06958	1.28242e-09	8.39604e-08	AAEL002929	AMP dependent ligase [Source:VB Community Annotation]			GO:0003824	catalytic activity
LOC5565546	140.509	-1.17757	0.194134	-6.06578	1.31314e-09	8.5577e-08	AAEL004847				GO:0008080	N-acetyltransferase activity
LOC5577668	356.817	-1.45181	0.239445	-6.06324	1.33406e-09	8.65433e-08	AAEL020609				GO:0004177,GO:0006508,GO:0008237,GO:0008270	aminopeptidase activity,proteolysis,metallopeptidase activity,zinc ion binding
LOC5567341	824.847	-1.2159	0.20056	-6.06251	1.34017e-09	8.65448e-08	AAEL006011				GO:0005515,GO:0016020,GO:0016021	protein binding,membrane,integral component of membrane
LOC5574026	601.673	1.1183	0.184499	6.06131	1.35019e-09	8.67969e-08	AAEL010867	serine protease [Source:VB Community Annotation]			GO:0004252,GO:0006508,GO:0008233,GO:0008236,GO:0016787	serine-type endopeptidase activity,proteolysis,peptidase activity,serine-type peptidase activity,hydrolase activity
LOC5566333	3033.63	0.791978	0.130775	6.05602	1.39532e-09	8.92941e-08	AAEL025187
LOC5573078	100.02	1.40117	0.231474	6.05324	1.41965e-09	9.04439e-08	AAEL010270				GO:0004252,GO:0006508,GO:0008233,GO:0008236,GO:0016787	serine-type endopeptidase activity,proteolysis,peptidase activity,serine-type peptidase activity,hydrolase activity
LOC23687871	670.426	0.970783	0.160546	6.04677	1.47778e-09	9.37268e-08	AAEL017451	Angiotensin-converting enzyme [Source:UniProtKB/TrEMBL;Acc:J9HF68]			GO:0004180,GO:0006508,GO:0008233,GO:0008237,GO:0008241,GO:0016020,GO:0016787,GO:0046872	carboxypeptidase activity,proteolysis,peptidase activity,metallopeptidase activity,peptidyl-dipeptidase activity,membrane,hydrolase activity,metal ion binding
LOC5578940	126.446	-2.84439	0.470851	-6.04096	1.53197e-09	9.67321e-08	AAEL003772
LOC5578738	1002.18	0.895935	0.148417	6.03659	1.57403e-09	9.89479e-08	AAEL003697	Serine Protease Inhibitor (serpin) homologue - unlikely to be inhibitory. [Source:VB Community Annotation]	SRPN17		GO:0004867,GO:0005615,GO:0010466,GO:0010951,GO:0030414	serine-type endopeptidase inhibitor activity,extracellular space,negative regulation of peptidase activity,negative regulation of endopeptidase activity,peptidase inhibitor activity
LOC5579929	500.171	-1.73009	0.286687	-6.03476	1.59201e-09	9.95353e-08	AAEL006805	cytochrome P450 [Source:VB Community Annotation]	CYP9J2		GO:0004497,GO:0005506,GO:0016020,GO:0016021,GO:0016491,GO:0016705,GO:0020037,GO:0046872,GO:0055114	monooxygenase activity,iron ion binding,membrane,integral component of membrane,oxidoreductase activity,oxidoreductase activity, acting on paired donors, with incorporation or reduction of molecular oxygen,heme binding,metal ion binding,oxidation-reduction process
LOC5565841	1200.11	-0.889884	0.147473	-6.03421	1.59739e-09	9.95353e-08	AAEL005043	ATP-dependent bile acid permease [Source:VB Community Annotation]			GO:0000166,GO:0005524,GO:0016020,GO:0016021,GO:0016887,GO:0022857,GO:0042626,GO:0055085	nucleotide binding,ATP binding,membrane,integral component of membrane,ATPase activity,transmembrane transporter activity,ATPase-coupled transmembrane transporter activity,transmembrane transport
LOC5563937	50.6872	2.07289	0.344488	6.0173	1.77349e-09	1.10026e-07	AAEL014246	glucosyl/glucuronosyl transferases [Source:VB Community Annotation]			GO:0008194,GO:0016020,GO:0016021,GO:0016740,GO:0016757,GO:0016758	UDP-glycosyltransferase activity,membrane,integral component of membrane,transferase activity,transferase activity, transferring glycosyl groups,transferase activity, transferring hexosyl groups
LOC5574186	72.7802	-3.32354	0.552744	-6.0128	1.82343e-09	1.12633e-07	AAEL002291				GO:0005509,GO:0007154,GO:0016020	calcium ion binding,cell communication,membrane
LOC110677066	5259.9	2.19361	0.364868	6.01206	1.8318e-09	1.1266e-07	AAEL027929
LOC5567414	868.424	0.716546	0.119209	6.01082	1.8459e-09	1.13037e-07	AAEL025199				GO:0000166,GO:0003824,GO:0004329,GO:0004486,GO:0004488,GO:0005524,GO:0006730,GO:0016874,GO:0035999,GO:0055114	nucleotide binding,catalytic activity,formate-tetrahydrofolate ligase activity,methylenetetrahydrofolate dehydrogenase [NAD(P)+] activity,methylenetetrahydrofolate dehydrogenase (NADP+) activity,ATP binding,one-carbon metabolic process,ligase activity,tetrahydrofolate interconversion,oxidation-reduction process
LOC23687758	272.333	-1.02431	0.171061	-5.98799	2.12446e-09	1.29538e-07	AAEL017338				GO:0000165,GO:0000166,GO:0000185,GO:0004672,GO:0004674,GO:0005524,GO:0006468,GO:0008349,GO:0016301,GO:0016310,GO:0016740	MAPK cascade,nucleotide binding,activation of MAPKKK activity,protein kinase activity,protein serine/threonine kinase activity,ATP binding,protein phosphorylation,MAP kinase kinase kinase kinase activity,kinase activity,phosphorylation,transferase activity
LOC5570980	5510.74	-1.35348	0.226469	-5.97644	2.2806e-09	1.38464e-07	AAEL008698	prolylcarboxypeptidase, putative [Source:VB Community Annotation]			GO:0006508,GO:0008236,GO:0016787	proteolysis,serine-type peptidase activity,hydrolase activity
LOC110677076	212.607	-1.00616	0.16849	-5.97159	2.34948e-09	1.41472e-07	AAEL023112
LOC5565507	379.909	1.27536	0.213573	5.97155	2.35006e-09	1.41472e-07	AAEL004809
LOC5578553	3755.06	-1.40097	0.234762	-5.96761	2.40755e-09	1.44321e-07	AAEL003570				GO:0008289	lipid binding
LOC110674152	49.8461	2.15614	0.362227	5.95247	2.64126e-09	1.57665e-07	AAEL020330				GO:0000166,GO:0005524	nucleotide binding,ATP binding
LOC110676139	2545.56	1.0725	0.180253	5.94996	2.68205e-09	1.5943e-07	AAEL026446
LOC5579933	609.639	-1.05794	0.177976	-5.9443	2.77642e-09	1.64353e-07	AAEL028635				GO:0004497,GO:0005506,GO:0016021,GO:0016491,GO:0016705,GO:0020037,GO:0046872,GO:0055114	monooxygenase activity,iron ion binding,integral component of membrane,oxidoreductase activity,oxidoreductase activity, acting on paired donors, with incorporation or reduction of molecular oxygen,heme binding,metal ion binding,oxidation-reduction process
LOC110679721	41.4256	-2.64993	0.446948	-5.92895	3.04883e-09	1.79729e-07	AAEL025141				GO:0003676	nucleic acid binding
LOC110678174	9312.63	0.766264	0.129461	5.91888	3.24149e-09	1.90297e-07	AAEL027171				GO:0005576,GO:0008061	extracellular region,chitin binding
LOC5566868	1109.55	-0.761037	0.12905	-5.89724	3.69632e-09	2.16105e-07	AAEL000800	microsomal dipeptidase [Source:VB Community Annotation]			GO:0006508,GO:0008233,GO:0008235,GO:0008237,GO:0008239,GO:0016020,GO:0016787,GO:0016805,GO:0031225,GO:0046872,GO:0070573	proteolysis,peptidase activity,metalloexopeptidase activity,metallopeptidase activity,dipeptidyl-peptidase activity,membrane,hydrolase activity,dipeptidase activity,anchored component of membrane,metal ion binding,metallodipeptidase activity
LOC5567994	28.1206	-2.67754	0.454832	-5.88687	3.9359e-09	2.29169e-07	AAEL006432	sugar transporter [Source:VB Community Annotation]			GO:0008643,GO:0016020,GO:0016021,GO:0022857,GO:0055085	carbohydrate transport,membrane,integral component of membrane,transmembrane transporter activity,transmembrane transport
LOC5568701	1386.7	-0.997322	0.169519	-5.88323	4.02342e-09	2.33309e-07	AAEL007063	lipase [Source:VB Community Annotation]			GO:0004806,GO:0005576,GO:0006629,GO:0008970,GO:0052689	triglyceride lipase activity,extracellular region,lipid metabolic process,phospholipase A1 activity,carboxylic ester hydrolase activity
LOC5576784	1698.07	1.41787	0.241442	5.8725	4.29276e-09	2.47916e-07	AAEL012764				GO:0008168,GO:0016740,GO:0017174,GO:0032259	methyltransferase activity,transferase activity,glycine N-methyltransferase activity,methylation
LOC5572674	1316.41	-1.11476	0.190005	-5.86702	4.43709e-09	2.55213e-07	AAEL009951	dimeric dihydrodiol dehydrogenase [Source:VB Community Annotation]			GO:0016491,GO:0055114	oxidoreductase activity,oxidation-reduction process
LOC5563806	44.6534	2.34874	0.400625	5.86267	4.55479e-09	2.60927e-07	AAEL014137	Clip-Domain Serine Protease family B. [Source:VB Community Annotation]	CLIPB25		GO:0004252,GO:0006508	serine-type endopeptidase activity,proteolysis
LOC5575548	44.0341	2.04341	0.348751	5.85923	4.65016e-09	2.6532e-07	AAEL002655	matrix metalloproteinase [Source:VB Community Annotation]			GO:0004222,GO:0006508,GO:0008233,GO:0008237,GO:0008270,GO:0016787,GO:0031012,GO:0046872	metalloendopeptidase activity,proteolysis,peptidase activity,metallopeptidase activity,zinc ion binding,hydrolase activity,extracellular matrix,metal ion binding
LOC5577512	93.2792	-2.11487	0.361249	-5.85431	4.78989e-09	2.722e-07	AAEL020734	Carboxylic ester hydrolase (Fragment) [Source:UniProtKB/TrEMBL;Acc:Q17G43]			GO:0016787,GO:0052689	hydrolase activity,carboxylic ester hydrolase activity
LOC5576799	3179.61	-1.31496	0.224781	-5.84996	4.91703e-09	2.78311e-07	AAEL012776	protease m1 zinc metalloprotease [Source:VB Community Annotation]			GO:0004177,GO:0006508,GO:0008233,GO:0008237,GO:0008270,GO:0016787,GO:0046872	aminopeptidase activity,proteolysis,peptidase activity,metallopeptidase activity,zinc ion binding,hydrolase activity,metal ion binding
LOC110676765	30.6424	-4.84078	0.827677	-5.84864	4.95618e-09	2.79415e-07	AAEL019894	Tubulin beta chain [Source:UniProtKB/TrEMBL;Acc:Q0PHP3]			GO:0000166,GO:0003924,GO:0005200,GO:0005525,GO:0005737,GO:0005856,GO:0005874,GO:0007010,GO:0007017	nucleotide binding,GTPase activity,structural constituent of cytoskeleton,GTP binding,cytoplasm,cytoskeleton,microtubule,cytoskeleton organization,microtubule-based process
LOC5569955	85.7561	1.81052	0.309731	5.84548	5.05119e-09	2.83645e-07	AAEL008050				GO:0017148,GO:0030598	negative regulation of translation,rRNA N-glycosylase activity
LOC110678032	20.4072	-3.98988	0.683214	-5.83986	5.22443e-09	2.92218e-07	AAEL021563
LOC5574696	81.4189	-2.70264	0.46297	-5.83763	5.29495e-09	2.95001e-07	AAEL011337				GO:0005576,GO:0006030,GO:0008061	extracellular region,chitin metabolic process,chitin binding
LOC5575143	1286.2	0.963763	0.165635	5.81861	5.93394e-09	3.2931e-07	AAEL012974	Glycine cleavage system H protein [Source:UniProtKB/TrEMBL;Acc:Q0IE94]			GO:0005739,GO:0005960,GO:0019464	mitochondrion,glycine cleavage complex,glycine decarboxylation via glycine cleavage system
LOC110677186	1674.05	-0.662938	0.114095	-5.8104	6.23219e-09	3.44517e-07	AAEL022548				GO:0003824,GO:0004553,GO:0005975,GO:0030246	catalytic activity,hydrolase activity, hydrolyzing O-glycosyl compounds,carbohydrate metabolic process,carbohydrate binding
LOC110674048	16.032	-7.39269	1.27537	-5.79651	6.7708e-09	3.7284e-07	AAEL023189
LOC5571588	5398.5	-0.648188	0.111965	-5.7892	7.07235e-09	3.87941e-07	AAEL009178	Gram-Negative Binding Protein (GNBP) or Beta-1 3-Glucan Binding Protein (BGBP). [Source:VB Community Annotation]	GNBPB4		GO:0004553,GO:0005975	hydrolase activity, hydrolyzing O-glycosyl compounds,carbohydrate metabolic process
LOC5574540	764.539	-0.873055	0.150833	-5.78822	7.11352e-09	3.88699e-07	AAEL011213				GO:0016020,GO:0016021	membrane,integral component of membrane
LOC5570981	9062.98	-1.45705	0.25226	-5.77598	7.6505e-09	4.16439e-07	AAEL008708	lysosomal pro-X carboxypeptidase, putative [Source:VB Community Annotation]			GO:0006508,GO:0008236,GO:0016787	proteolysis,serine-type peptidase activity,hydrolase activity
LOC5572794	614.544	-1.06023	0.183654	-5.77298	7.78802e-09	4.22307e-07	AAEL001902	glutamate decarboxylase [Source:VB Community Annotation]			GO:0003824,GO:0016829,GO:0016831,GO:0019752,GO:0030170	catalytic activity,lyase activity,carboxy-lyase activity,carboxylic acid metabolic process,pyridoxal phosphate binding
LOC110675781	427.823	-1.25137	0.217442	-5.75494	8.66739e-09	4.68204e-07	AAEL009968				GO:0000166,GO:0009166,GO:0016787,GO:0016788,GO:0046872	nucleotide binding,nucleotide catabolic process,hydrolase activity,hydrolase activity, acting on ester bonds,metal ion binding
LOC5564064	6163.32	0.524725	0.0915989	5.72851	1.01319e-08	5.4524e-07	AAEL004054	cytochrome P450 [Source:VB Community Annotation]	CYP4G36		GO:0004497,GO:0005506,GO:0016020,GO:0016021,GO:0016491,GO:0016705,GO:0020037,GO:0046872,GO:0055114	monooxygenase activity,iron ion binding,membrane,integral component of membrane,oxidoreductase activity,oxidoreductase activity, acting on paired donors, with incorporation or reduction of molecular oxygen,heme binding,metal ion binding,oxidation-reduction process
LOC110678298	201.509	1.7055	0.297797	5.72706	1.02186e-08	5.47834e-07	AAEL026698
LOC110680885	832.983	-1.22945	0.214796	-5.7238	1.04167e-08	5.55863e-07	AAEL022733				GO:0006508,GO:0008237,GO:0008270	proteolysis,metallopeptidase activity,zinc ion binding
LOC5571261	94.5567	1.39177	0.243175	5.72331	1.04466e-08	5.55863e-07	AAEL001545				GO:0003676	nucleic acid binding
LOC5569910	51.9568	1.96042	0.342641	5.72149	1.05592e-08	5.59758e-07	AAEL021528
LOC110674389	14.2056	7.34222	1.28377	5.71928	1.06976e-08	5.62894e-07	AAEL024518
LOC110681193	14.2056	7.34222	1.28377	5.71928	1.06976e-08	5.62894e-07	AAEL025359
LOC5571542	584.332	-1.24731	0.218146	-5.71777	1.0793e-08	5.65816e-07	AAEL009130	cytochrome P450 [Source:VB Community Annotation]	CYP6Z7		GO:0004497,GO:0005506,GO:0016491,GO:0016705,GO:0020037,GO:0046872,GO:0055114	monooxygenase activity,iron ion binding,oxidoreductase activity,oxidoreductase activity, acting on paired donors, with incorporation or reduction of molecular oxygen,heme binding,metal ion binding,oxidation-reduction process
LOC5579507	1740.88	-1.00725	0.176294	-5.71343	1.10718e-08	5.77369e-07	AAEL009956				GO:0005576,GO:0005623,GO:0032367	extracellular region,obsolete cell,intracellular cholesterol transport
LOC5565995	286.624	-1.28963	0.225732	-5.71308	1.10947e-08	5.77369e-07	AAEL014842	multiple inositol polyphosphate phosphatase [Source:VB Community Annotation]			GO:0004446,GO:0016311,GO:0016791,GO:0034417,GO:0052826	inositol-hexakisphosphate phosphatase activity,dephosphorylation,phosphatase activity,bisphosphoglycerate 3-phosphatase activity,inositol hexakisphosphate 2-phosphatase activity
LOC5576397	377.234	-0.854149	0.149782	-5.70263	1.17973e-08	6.11696e-07	AAEL012482				GO:0004842,GO:0016020,GO:0016021,GO:0016567,GO:0046872	ubiquitin-protein transferase activity,membrane,integral component of membrane,protein ubiquitination,metal ion binding
LOC5563985	105.817	-2.90868	0.510258	-5.7004	1.19525e-08	6.17489e-07	AAEL004021	Glucose dehydrogenase [Source:UniProtKB/TrEMBL;Acc:A0A1S4F6C5]			GO:0016614,GO:0050660,GO:0055114	oxidoreductase activity, acting on CH-OH group of donors,flavin adenine dinucleotide binding,oxidation-reduction process
LOC5571678	385.089	-0.883801	0.155474	-5.68454	1.31164e-08	6.75164e-07	AAEL001647				GO:0005515	protein binding
LOC5576294	148.323	1.31701	0.231947	5.67806	1.3623e-08	6.98706e-07	AAEL012437				GO:0003676,GO:0046872	nucleic acid binding,metal ion binding
LOC5578361	318.929	-1.05189	0.185664	-5.66553	1.46571e-08	7.49043e-07	AAEL003550	aquaporin [Source:VB Community Annotation]			GO:0015267,GO:0016020,GO:0016021,GO:0055085	channel activity,membrane,integral component of membrane,transmembrane transport
LOC5569420	316.377	0.964929	0.170693	5.65302	1.57656e-08	8.02804e-07	AAEL007626	Gram-Negative Binding Protein (GNBP) or Beta-1 3-Glucan Binding Protein (BGBP). [Source:VB Community Annotation]	GNBPA1		GO:0002376,GO:0004553,GO:0005975,GO:0030246,GO:0045087	immune system process,hydrolase activity, hydrolyzing O-glycosyl compounds,carbohydrate metabolic process,carbohydrate binding,innate immune response
LOC5565277	297.264	-0.896676	0.158651	-5.65187	1.58708e-08	8.05272e-07	AAEL019489				GO:0000981,GO:0003677,GO:0005634,GO:0006355,GO:0006357,GO:0043565,GO:0046872	DNA-binding transcription factor activity, RNA polymerase II-specific,DNA binding,nucleus,regulation of transcription, DNA-templated,regulation of transcription by RNA polymerase II,sequence-specific DNA binding,metal ion binding
LOC5564750	703.786	-0.902258	0.159665	-5.65095	1.59568e-08	8.06753e-07	AAEL014614	cytochrome P450 [Source:VB Community Annotation]			GO:0004497,GO:0005506,GO:0016020,GO:0016021,GO:0016491,GO:0016705,GO:0020037,GO:0046872,GO:0055114	monooxygenase activity,iron ion binding,membrane,integral component of membrane,oxidoreductase activity,oxidoreductase activity, acting on paired donors, with incorporation or reduction of molecular oxygen,heme binding,metal ion binding,oxidation-reduction process
LOC5565155	20243.1	0.659659	0.116757	5.64986	1.60578e-08	8.08982e-07	AAEL004631	actin [Source:VB Community Annotation]			GO:0005524,GO:0005737,GO:0005856	ATP binding,cytoplasm,cytoskeleton
LOC5577233	721.718	0.873844	0.154889	5.64174	1.68345e-08	8.45113e-07	AAEL003139	short-chain dehydrogenase [Source:VB Community Annotation]			GO:0016020,GO:0016021,GO:0055114	membrane,integral component of membrane,oxidation-reduction process
LOC5568900	1697.46	1.1119	0.197136	5.64028	1.69778e-08	8.49311e-07	AAEL007206
LOC5572144	99.9387	1.37842	0.244654	5.63416	1.75918e-08	8.76938e-07	AAEL009554				GO:0004252,GO:0006508	serine-type endopeptidase activity,proteolysis
LOC5565804	4627.51	0.698137	0.123966	5.6317	1.78446e-08	8.86425e-07	AAEL005008	aquaporin [Source:VB Community Annotation]			GO:0015267,GO:0016020,GO:0016021,GO:0055085	channel activity,membrane,integral component of membrane,transmembrane transport
LOC5576621	9610.06	0.747175	0.13276	5.62801	1.82296e-08	9.02399e-07	AAEL012645				GO:0005576,GO:0006030,GO:0008061	extracellular region,chitin metabolic process,chitin binding
LOC5565207	173.517	-1.28036	0.227611	-5.62519	1.85301e-08	9.1281e-07	AAEL004684				GO:0005737,GO:0120009,GO:0120013	cytoplasm,intermembrane lipid transfer,lipid transfer activity
LOC110680759	98.2633	2.52577	0.449086	5.62424	1.86327e-08	9.1281e-07	AAEL027792	defensin anti-microbial peptide [Source:VB Community Annotation]	DEFA		GO:0006952	defense response
LOC5579099	98.2633	2.52577	0.449086	5.62424	1.86327e-08	9.1281e-07	AAEL003841	defensin anti-microbial peptide [Source:VB Community Annotation]	DEFA		GO:0002376,GO:0005576,GO:0006952,GO:0042742,GO:0045087,GO:0050829,GO:0050830	immune system process,extracellular region,defense response,defense response to bacterium,innate immune response,defense response to Gram-negative bacterium,defense response to Gram-positive bacterium
LOC5568363	2666.05	0.843354	0.150159	5.61642	1.94955e-08	9.51793e-07	AAEL001077	Clip-Domain Serine Protease family B. Protease homologue. [Source:VB Community Annotation]	CLIPB45		GO:0004252,GO:0006508	serine-type endopeptidase activity,proteolysis
LOC5577284	4047.77	-0.576255	0.10284	-5.6034	2.10187e-08	1.02265e-06	AAEL013138				GO:0005515	protein binding
LOC5564672	190.685	1.16865	0.208658	5.60079	2.13378e-08	1.03463e-06	AAEL014556				GO:0006144,GO:0016829,GO:0016831,GO:0019428,GO:0019628	purine nucleobase metabolic process,lyase activity,carboxy-lyase activity,allantoin biosynthetic process,urate catabolic process
LOC5574945	703.239	-1.95199	0.349176	-5.59028	2.26707e-08	1.09552e-06	AAEL011547	metalloproteinase, putative [Source:VB Community Annotation]			GO:0004222,GO:0006508,GO:0008233,GO:0008237,GO:0008270,GO:0016787,GO:0046872	metalloendopeptidase activity,proteolysis,peptidase activity,metallopeptidase activity,zinc ion binding,hydrolase activity,metal ion binding
LOC110675194	13.9271	7.31527	1.30999	5.58423	2.34733e-08	1.13046e-06	AAEL027107				GO:0003723,GO:0005737,GO:0030430	RNA binding,cytoplasm,host cell cytoplasm
LOC5568749	194.322	-1.11685	0.200061	-5.58254	2.37026e-08	1.13764e-06	AAEL007097	4-nitrophenylphosphatase [Source:UniProtKB/TrEMBL;Acc:Q0IF18]			GO:0016787	hydrolase activity
LOC5568175	260.577	1.80482	0.323473	5.57951	2.4119e-08	1.15373e-06	AAEL006617				GO:0004672,GO:0005524,GO:0006468	protein kinase activity,ATP binding,protein phosphorylation
LOC5575852	1169.54	0.687308	0.123411	5.56924	2.5585e-08	1.21975e-06	AAEL012120	fad oxidoreductase [Source:VB Community Annotation]			GO:0016491,GO:0055114	oxidoreductase activity,oxidation-reduction process
LOC5572635	4458.81	-1.13368	0.203915	-5.55958	2.70419e-08	1.2849e-06	AAEL001839	zinc carboxypeptidase [Source:VB Community Annotation]			GO:0004180,GO:0004181,GO:0006508,GO:0008233,GO:0008237,GO:0008270,GO:0016787,GO:0046872	carboxypeptidase activity,metallocarboxypeptidase activity,proteolysis,peptidase activity,metallopeptidase activity,zinc ion binding,hydrolase activity,metal ion binding
LOC5565074	991.196	-0.879349	0.158462	-5.54927	2.86869e-08	1.35851e-06	AAEL017128				GO:0003824,GO:0005975,GO:0008152,GO:0016798	catalytic activity,carbohydrate metabolic process,metabolic process,hydrolase activity, acting on glycosyl bonds
LOC5578922	871.821	-0.877625	0.158196	-5.5477	2.89457e-08	1.36622e-06	AAEL003764				GO:0016020,GO:0016021	membrane,integral component of membrane
LOC110675912	102.825	-1.21626	0.2193	-5.54613	2.92057e-08	1.37393e-06	AAEL022575
LOC5567092	330.432	1.44455	0.260497	5.54538	2.93324e-08	1.37533e-06	AAEL012311	vitellogenin, putative [Source:VB Community Annotation]			GO:0004806,GO:0005576,GO:0052689	triglyceride lipase activity,extracellular region,carboxylic ester hydrolase activity
LOC5575495	2820.69	-0.63332	0.114269	-5.54237	2.98401e-08	1.39453e-06	AAEL011870	rap55 [Source:VB Community Annotation]			GO:0006397	mRNA processing
LOC5567287	906.706	0.780617	0.141737	5.50751	3.63941e-08	1.69525e-06	AAEL005951	lipid storage droplets surface binding protein [Source:VB Community Annotation]
LOC5574096	460.603	0.728967	0.132596	5.49767	3.84837e-08	1.78672e-06	AAEL002269	purine nucleoside phosphorylase [Source:VB Community Annotation]			GO:0003824,GO:0004731,GO:0005634,GO:0006139,GO:0009116,GO:0016740,GO:0016757	catalytic activity,purine-nucleoside phosphorylase activity,nucleus,nucleobase-containing compound metabolic process,nucleoside metabolic process,transferase activity,transferase activity, transferring glycosyl groups
LOC5579190	335.944	-1.14429	0.20859	-5.48582	4.11566e-08	1.9046e-06	AAEL003899	sugar transporter [Source:VB Community Annotation]			GO:0016020,GO:0016021,GO:0022857,GO:0055085	membrane,integral component of membrane,transmembrane transporter activity,transmembrane transport
LOC5567003	279.43	1.11903	0.204353	5.47596	4.35142e-08	2.00716e-06	AAEL005753	serine protease [Source:VB Community Annotation]			GO:0004252,GO:0006508,GO:0008233,GO:0008236,GO:0016787	serine-type endopeptidase activity,proteolysis,peptidase activity,serine-type peptidase activity,hydrolase activity
LOC5571787	2260.7	-1.47493	0.269432	-5.47422	4.39452e-08	2.02048e-06	AAEL023559				GO:0004180,GO:0006508,GO:0008233,GO:0008237,GO:0008241,GO:0016020,GO:0016021,GO:0016787,GO:0046872	carboxypeptidase activity,proteolysis,peptidase activity,metallopeptidase activity,peptidyl-dipeptidase activity,membrane,integral component of membrane,hydrolase activity,metal ion binding
LOC110676280	1272.08	1.17301	0.214663	5.46444	4.6436e-08	2.12812e-06	AAEL027117
LOC5578135	22042.6	1.53979	0.282028	5.45969	4.76975e-08	2.1789e-06
LOC5564118	2113.88	-0.738021	0.135762	-5.43615	5.4444e-08	2.47912e-06	AAEL004118	aldo-keto reductase [Source:VB Community Annotation]			GO:0016491,GO:0055114	oxidoreductase activity,oxidation-reduction process
LOC5578593	307.931	-0.800043	0.147474	-5.42496	5.79677e-08	2.63114e-06	AAEL013776
LOC5577944	5687.45	-1.0307	0.19039	-5.41363	6.176e-08	2.79435e-06	AAEL013421	Alpha-amylase [Source:UniProtKB/TrEMBL;Acc:Q16J70]			GO:0003824,GO:0004556,GO:0005975,GO:0008152,GO:0016787,GO:0016798,GO:0043169,GO:0046872,GO:0103025	catalytic activity,alpha-amylase activity,carbohydrate metabolic process,metabolic process,hydrolase activity,hydrolase activity, acting on glycosyl bonds,cation binding,metal ion binding,alpha-amylase activity (releasing maltohexaose)
LOC5568897	316.672	0.975434	0.180204	5.41293	6.20012e-08	2.79635e-06	AAEL026878				GO:0006629,GO:0006633,GO:0016020,GO:0016021,GO:0016491,GO:0016717,GO:0055114	lipid metabolic process,fatty acid biosynthetic process,membrane,integral component of membrane,oxidoreductase activity,oxidoreductase activity, acting on paired donors, with oxidation of a pair of donors resulting in the reduction of molecular oxygen to two molecules of water,oxidation-reduction process
LOC5574293	560.52	-0.857365	0.158409	-5.41234	6.22074e-08	2.79677e-06	AAEL021092				GO:0003712,GO:0005634,GO:0006357,GO:0030274	transcription coregulator activity,nucleus,regulation of transcription by RNA polymerase II,LIM domain binding
LOC5577951	347.47	1.4741	0.272445	5.41061	6.281e-08	2.81496e-06	AAEL019445				GO:0004930,GO:0007186,GO:0016020,GO:0016021	G protein-coupled receptor activity,G protein-coupled receptor signaling pathway,membrane,integral component of membrane
LOC5566438	2552.33	0.967531	0.178849	5.40976	6.31095e-08	2.81949e-06	AAEL018340				GO:0016020,GO:0016021	membrane,integral component of membrane
LOC5566281	1784.7	-0.582021	0.107637	-5.40723	6.40053e-08	2.85054e-06	AAEL000735	acyl-CoA oxidase [Source:VB Community Annotation]			GO:0003997,GO:0005777,GO:0006629,GO:0006631,GO:0006635,GO:0016491,GO:0016627,GO:0050660,GO:0055114,GO:0071949	acyl-CoA oxidase activity,peroxisome,lipid metabolic process,fatty acid metabolic process,fatty acid beta-oxidation,oxidoreductase activity,oxidoreductase activity, acting on the CH-CH group of donors,flavin adenine dinucleotide binding,oxidation-reduction process,FAD binding
LOC5573294	413.552	-0.741436	0.137134	-5.40665	6.42144e-08	2.85092e-06	AAEL010384	aldehyde oxidase [Source:VB Community Annotation]			GO:0005506,GO:0005777,GO:0009055,GO:0016491,GO:0022900,GO:0046872,GO:0050660,GO:0051536,GO:0051537,GO:0055114,GO:0071949	iron ion binding,peroxisome,electron transfer activity,oxidoreductase activity,electron transport chain,metal ion binding,flavin adenine dinucleotide binding,iron-sulfur cluster binding,2 iron, 2 sulfur cluster binding,oxidation-reduction process,FAD binding
LOC5573080	1087.17	-0.898724	0.166269	-5.40523	6.47266e-08	2.86471e-06	AAEL010266
LOC5580113	590.925	-0.704961	0.13058	-5.39869	6.713e-08	2.96185e-06	AAEL020441				GO:0004067,GO:0006508,GO:0008798,GO:0016787	asparaginase activity,proteolysis,beta-aspartyl-peptidase activity,hydrolase activity
LOC5563628	17.8758	-3.78665	0.70153	-5.39771	6.74983e-08	2.96888e-06	AAEL000017
LOC110678336	19.5718	-3.35706	0.622007	-5.39715	6.77078e-08	2.9689e-06	AAEL021661
LOC5568692	98.6346	-1.33909	0.248252	-5.39407	6.88783e-08	3.01094e-06	AAEL007052	lipase [Source:VB Community Annotation]			GO:0004806,GO:0005576,GO:0006629,GO:0052689	triglyceride lipase activity,extracellular region,lipid metabolic process,carboxylic ester hydrolase activity
LOC5579873	261.807	0.922549	0.171965	5.36474	8.10643e-08	3.53276e-06	AAEL026163				GO:0005509	calcium ion binding
LOC5579022	1966.66	0.981284	0.184137	5.32909	9.87042e-08	4.28835e-06	AAEL013961
LOC5564984	422.553	0.666665	0.125144	5.32718	9.97481e-08	4.32049e-06	AAEL019853				GO:0004252,GO:0006508	serine-type endopeptidase activity,proteolysis
LOC110681024	139.134	-1.17461	0.220611	-5.32436	1.0131e-07	4.37481e-06	AAEL027184
LOC5568359	646.503	1.03758	0.195323	5.31211	1.0836e-07	4.66508e-06	AAEL001084	Clip-Domain Serine Protease family B. Protease homologue. [Source:VB Community Annotation]	CLIPB21		GO:0004252,GO:0006508	serine-type endopeptidase activity,proteolysis
LOC5575040	17.4003	-4.26301	0.803526	-5.30538	1.12437e-07	4.8125e-06	AAEL011591
LOC5567088	151.572	-1.31043	0.247002	-5.30534	1.12462e-07	4.8125e-06	AAEL025983				GO:0005634,GO:0005737,GO:0005813,GO:0005856,GO:0030030,GO:0042995,GO:0060271	nucleus,cytoplasm,centrosome,cytoskeleton,cell projection organization,cell projection,cilium assembly
LOC23687462	381.25	-0.858197	0.161881	-5.30141	1.14912e-07	4.90256e-06	AAEL017042
LOC5569242	518.971	0.948957	0.179035	5.3004	1.15551e-07	4.91506e-06	AAEL021555				GO:0016020,GO:0016021,GO:0022857,GO:0055085	membrane,integral component of membrane,transmembrane transporter activity,transmembrane transport
LOC5564757	625.252	-1.29413	0.244273	-5.29787	1.17159e-07	4.96861e-06	AAEL014604	cytochrome P450 [Source:VB Community Annotation]			GO:0004497,GO:0005506,GO:0016020,GO:0016021,GO:0016491,GO:0016705,GO:0020037,GO:0046872,GO:0055114	monooxygenase activity,iron ion binding,membrane,integral component of membrane,oxidoreductase activity,oxidoreductase activity, acting on paired donors, with incorporation or reduction of molecular oxygen,heme binding,metal ion binding,oxidation-reduction process
LOC110676966	119.729	1.39102	0.262738	5.29431	1.19467e-07	5.03638e-06	AAEL026610				GO:0003810,GO:0018149	protein-glutamine gamma-glutamyltransferase activity,peptide cross-linking
LOC110681051	119.729	1.39102	0.262738	5.29431	1.19467e-07	5.03638e-06	AAEL022582				GO:0003810,GO:0018149	protein-glutamine gamma-glutamyltransferase activity,peptide cross-linking
LOC5564443	1827.35	0.859458	0.162482	5.28956	1.22611e-07	5.15364e-06	AAEL004249
LOC5569909	40.6204	2.08263	0.394731	5.27608	1.31979e-07	5.53105e-06	AAEL021528
LOC5573084	831.043	0.960189	0.182248	5.2686	1.37469e-07	5.74419e-06	AAEL010276	aminomethyltransferase [Source:VB Community Annotation]			GO:0004047,GO:0005515,GO:0005739,GO:0006546,GO:0008483,GO:0016740	aminomethyltransferase activity,protein binding,mitochondrion,glycine catabolic process,transaminase activity,transferase activity
LOC5569107	162.033	1.28978	0.245405	5.25573	1.47439e-07	6.14271e-06	AAEL007371
LOC5574953	2179.14	-0.625647	0.119572	-5.23238	1.67344e-07	6.95161e-06	AAEL011551				GO:0016020,GO:0016021	membrane,integral component of membrane
LOC23687880	22932.6	-0.56618	0.108428	-5.22174	1.77251e-07	7.34172e-06	AAEL017460	Angiotensin-converting enzyme [Source:UniProtKB/TrEMBL;Acc:A0A1S4G6D0]			GO:0004180,GO:0006508,GO:0008233,GO:0008237,GO:0008241,GO:0016020,GO:0016787,GO:0046872	carboxypeptidase activity,proteolysis,peptidase activity,metallopeptidase activity,peptidyl-dipeptidase activity,membrane,hydrolase activity,metal ion binding
LOC110676294	124.379	-1.94969	0.373477	-5.22036	1.78576e-07	7.37507e-06	AAEL003712	C-Type Lysozyme (Lys-E). [Source:VB Community Annotation]	LYSC10		GO:0003796	lysozyme activity
LOC5563591	4495.93	-0.915102	0.175328	-5.21937	1.79533e-07	7.39313e-06	AAEL000006	phosphoenolpyruvate carboxykinase [Source:VB Community Annotation]			GO:0000166,GO:0004611,GO:0004613,GO:0005525,GO:0006094,GO:0016829,GO:0016831,GO:0017076,GO:0046872	nucleotide binding,phosphoenolpyruvate carboxykinase activity,phosphoenolpyruvate carboxykinase (GTP) activity,GTP binding,gluconeogenesis,lyase activity,carboxy-lyase activity,purine nucleotide binding,metal ion binding
LOC5570852	261.281	-1.21693	0.23336	-5.21484	1.83975e-07	7.55414e-06	AAEL008632	ABC transporter [Source:VB Community Annotation]			GO:0000166,GO:0005524,GO:0016020,GO:0016021,GO:0016887,GO:0042626	nucleotide binding,ATP binding,membrane,integral component of membrane,ATPase activity,ATPase-coupled transmembrane transporter activity
LOC110680884	2212.69	-1.18662	0.227637	-5.21276	1.86051e-07	7.61737e-06	AAEL025617
LOC5575138	67.4452	-4.14257	0.795653	-5.20651	1.92425e-07	7.85569e-06	AAEL000327	Ecdysone-induced protein 78C Nuclear receptor [Source:VB Community Annotation]	E78		GO:0003677,GO:0003700,GO:0003707,GO:0004879,GO:0005634,GO:0006355,GO:0008270,GO:0030522,GO:0042025,GO:0043565,GO:0046872	DNA binding,DNA-binding transcription factor activity,steroid hormone receptor activity,nuclear receptor activity,nucleus,regulation of transcription, DNA-templated,zinc ion binding,intracellular receptor signaling pathway,host cell nucleus,sequence-specific DNA binding,metal ion binding
LOC5566869	330.378	-1.09449	0.210508	-5.19926	2.00085e-07	8.145e-06	AAEL000842	microsomal dipeptidase [Source:VB Community Annotation]			GO:0006508,GO:0008233,GO:0008235,GO:0008237,GO:0008239,GO:0016020,GO:0016787,GO:0016805,GO:0031225,GO:0046872,GO:0070573	proteolysis,peptidase activity,metalloexopeptidase activity,metallopeptidase activity,dipeptidyl-peptidase activity,membrane,hydrolase activity,dipeptidase activity,anchored component of membrane,metal ion binding,metallodipeptidase activity
LOC5567423	10359.5	0.587751	0.113142	5.19482	2.04915e-07	8.31778e-06	AAEL006070	Phosphoglycerate mutase [Source:UniProtKB/TrEMBL;Acc:Q177P3]			GO:0003824,GO:0004082,GO:0004619,GO:0006096,GO:0016853,GO:0016868	catalytic activity,bisphosphoglycerate mutase activity,phosphoglycerate mutase activity,glycolytic process,isomerase activity,intramolecular transferase activity, phosphotransferases
LOC5566237	621.85	-0.645954	0.124604	-5.18405	2.1712e-07	8.77786e-06	AAEL005276	target of myb1 (tom1) [Source:VB Community Annotation]			GO:0005623,GO:0006886,GO:0015031	obsolete cell,intracellular protein transport,protein transport
LOC110678367	16.774	-3.47153	0.669697	-5.18374	2.17485e-07	8.77786e-06	AAEL025622
LOC5569163	2275.05	-0.973216	0.187923	-5.17881	2.23309e-07	8.98741e-06	AAEL026357				GO:0005506,GO:0016491,GO:0016702,GO:0017172,GO:0042412,GO:0046872,GO:0051213,GO:0055114	iron ion binding,oxidoreductase activity,oxidoreductase activity, acting on single donors with incorporation of molecular oxygen, incorporation of two atoms of oxygen,cysteine dioxygenase activity,taurine biosynthetic process,metal ion binding,dioxygenase activity,oxidation-reduction process
LOC5566832	544.472	0.622829	0.120301	5.17724	2.2519e-07	9.0375e-06	AAEL005665	Serine Protease Inhibitor (serpin) likely cleavage at T/I. [Source:VB Community Annotation]	SRPN3		GO:0004867,GO:0005615,GO:0010466,GO:0010951,GO:0030414	serine-type endopeptidase inhibitor activity,extracellular space,negative regulation of peptidase activity,negative regulation of endopeptidase activity,peptidase inhibitor activity
LOC5565843	995.243	-0.959886	0.185492	-5.17481	2.28147e-07	9.13036e-06	AAEL005045	ATP-dependent bile acid permease [Source:VB Community Annotation]			GO:0000166,GO:0005524,GO:0016020,GO:0016021,GO:0016887,GO:0022857,GO:0042626,GO:0055085	nucleotide binding,ATP binding,membrane,integral component of membrane,ATPase activity,transmembrane transporter activity,ATPase-coupled transmembrane transporter activity,transmembrane transport
LOC23687443	220.008	1.28502	0.248455	5.17202	2.31575e-07	9.24154e-06	AAEL017023				GO:0004866,GO:0005576,GO:0005615,GO:0010951	endopeptidase inhibitor activity,extracellular region,extracellular space,negative regulation of endopeptidase activity
LOC5570975	19.5062	-4.78014	0.925558	-5.1646	2.40951e-07	9.58877e-06	AAEL008711
LOC5577516	162.637	-1.1412	0.221163	-5.16001	2.46943e-07	9.79977e-06	AAEL003198	Carboxy/choline esterase Alpha Esterase [Source:VB Community Annotation]	CCEAE6C
LOC5574223	2954.56	-0.63533	0.123278	-5.15362	2.55504e-07	1.01113e-05	AAEL012382				GO:0000166,GO:0009166,GO:0016787,GO:0016788,GO:0046872	nucleotide binding,nucleotide catabolic process,hydrolase activity,hydrolase activity, acting on ester bonds,metal ion binding
LOC5564751	509.129	-0.675785	0.131401	-5.14294	2.70479e-07	1.06741e-05	AAEL014617	cytochrome P450 [Source:VB Community Annotation]	CYP9J28		GO:0004497,GO:0005506,GO:0016020,GO:0016021,GO:0016491,GO:0016705,GO:0020037,GO:0046872,GO:0055114	monooxygenase activity,iron ion binding,membrane,integral component of membrane,oxidoreductase activity,oxidoreductase activity, acting on paired donors, with incorporation or reduction of molecular oxygen,heme binding,metal ion binding,oxidation-reduction process
LOC110674747	15.3436	4.99323	0.971229	5.14115	2.73062e-07	1.07463e-05	AAEL028085
LOC5564201	116.64	1.27797	0.248911	5.13422	2.83317e-07	1.1119e-05	AAEL014349	Clip-Domain Serine Protease family B. [Source:VB Community Annotation]	CLIPB15		GO:0004252,GO:0005576,GO:0006508,GO:0008233,GO:0008236,GO:0016787	serine-type endopeptidase activity,extracellular region,proteolysis,peptidase activity,serine-type peptidase activity,hydrolase activity
LOC5565274	423.258	1.27824	0.249051	5.13247	2.85971e-07	1.11923e-05	AAEL004701	Argininosuccinate synthase (EC 6.3.4.5)(Citrulline--aspartate ligase) [Source:VB Community Annotation]			GO:0000050,GO:0000166,GO:0004055,GO:0005524,GO:0006526,GO:0008652,GO:0016874	urea cycle,nucleotide binding,argininosuccinate synthase activity,ATP binding,arginine biosynthetic process,cellular amino acid biosynthetic process,ligase activity
LOC5572453	357.303	0.821332	0.160183	5.12747	2.93668e-07	1.14619e-05	AAEL001813	sodium/solute symporter [Source:VB Community Annotation]			GO:0016020,GO:0016021,GO:0022857,GO:0055085	membrane,integral component of membrane,transmembrane transporter activity,transmembrane transport
LOC5565066	7198.29	-0.617372	0.120485	-5.12408	2.98994e-07	1.16378e-05	AAEL004580	beta-galactosidase [Source:VB Community Annotation]			GO:0004553,GO:0004565,GO:0005975,GO:0008152,GO:0016020,GO:0016021,GO:0016787,GO:0016798	hydrolase activity, hydrolyzing O-glycosyl compounds,beta-galactosidase activity,carbohydrate metabolic process,metabolic process,membrane,integral component of membrane,hydrolase activity,hydrolase activity, acting on glycosyl bonds
LOC5566240	1157.16	1.15086	0.224659	5.1227	3.01196e-07	1.16915e-05	AAEL024128
LOC110679236	16.0785	-3.62134	0.707613	-5.11769	3.09304e-07	1.19735e-05	AAEL026510
LOC5577961	29.2142	2.13206	0.417193	5.1105	3.21314e-07	1.24047e-05	AAEL013444
LOC5572218	1290.66	-1.02229	0.200297	-5.10387	3.32779e-07	1.28124e-05	AAEL009625	short-chain dehydrogenase [Source:VB Community Annotation]			GO:0055114	oxidation-reduction process
LOC5571113	501.388	-0.716229	0.140366	-5.10257	3.35072e-07	1.28659e-05	AAEL001509				GO:0005085,GO:0005089,GO:0035023	guanyl-nucleotide exchange factor activity,Rho guanyl-nucleotide exchange factor activity,regulation of Rho protein signal transduction
LOC110681126	166.46	-1.12697	0.221003	-5.09932	3.40873e-07	1.30533e-05	AAEL026956
LOC5568457	302.576	0.82699	0.162256	5.09684	3.45374e-07	1.31901e-05	AAEL006854	Niemann-Pick Type C-2, putative [Source:VB Community Annotation]			GO:0005576,GO:0005623,GO:0032367	extracellular region,obsolete cell,intracellular cholesterol transport
LOC5570211	6703.29	-1.07039	0.210224	-5.09164	3.54985e-07	1.35208e-05	AAEL019828				GO:0006508,GO:0008233,GO:0008237,GO:0008270,GO:0016787,GO:0046872	proteolysis,peptidase activity,metallopeptidase activity,zinc ion binding,hydrolase activity,metal ion binding
LOC5563930	53.2744	-2.95422	0.580424	-5.08976	3.58525e-07	1.36192e-05	AAEL014231				GO:0005520,GO:0005576	insulin-like growth factor binding,extracellular region
LOC5580175	763.587	-1.74815	0.343514	-5.08903	3.59905e-07	1.36351e-05	AAEL002555	sodium/solute symporter [Source:VB Community Annotation]			GO:0016020,GO:0016021,GO:0022857,GO:0055085	membrane,integral component of membrane,transmembrane transporter activity,transmembrane transport
LOC5574403	4001.54	-0.828689	0.162876	-5.08785	3.6215e-07	1.36837e-05	AAEL011129	alcohol dehydrogenase [Source:VB Community Annotation]			GO:0008270,GO:0016491,GO:0046872,GO:0055114	zinc ion binding,oxidoreductase activity,metal ion binding,oxidation-reduction process
LOC5564957	453.464	0.701935	0.138112	5.08237	3.72748e-07	1.40468e-05	AAEL021728				GO:0006508,GO:0008233,GO:0008236	proteolysis,peptidase activity,serine-type peptidase activity
LOC5572844	36.1047	-2.29863	0.452646	-5.0782	3.81019e-07	1.43205e-05	AAEL010064				GO:0005576,GO:0008061	extracellular region,chitin binding
LOC5572782	1332.19	-0.631361	0.124348	-5.07737	3.82697e-07	1.43456e-05	AAEL010047				GO:0000038,GO:0000166,GO:0005524,GO:0005777,GO:0006635,GO:0016020,GO:0016021,GO:0016887,GO:0042626,GO:0055085	very long-chain fatty acid metabolic process,nucleotide binding,ATP binding,peroxisome,fatty acid beta-oxidation,membrane,integral component of membrane,ATPase activity,ATPase-coupled transmembrane transporter activity,transmembrane transport
LOC5576287	1096.54	-0.625826	0.12336	-5.07317	3.9125e-07	1.46276e-05	AAEL012439	enoyl-CoA hydratase (enoyl hydrase) (unsaturated acyl-CoA hydratase), putative [Source:VB Community Annotation]			GO:0003824	catalytic activity
LOC5572754	130.743	-1.0107	0.199436	-5.06781	4.02421e-07	1.50058e-05	AAEL010021	serine/threonine-protein kinase 38 (ndr2 protein kinase) [Source:VB Community Annotation]			GO:0000166,GO:0004672,GO:0004674,GO:0005524,GO:0006468,GO:0016301,GO:0016310,GO:0016740	nucleotide binding,protein kinase activity,protein serine/threonine kinase activity,ATP binding,protein phosphorylation,kinase activity,phosphorylation,transferase activity
LOC5564200	831.097	-0.708455	0.140041	-5.05889	4.21694e-07	1.56833e-05	AAEL018273				GO:0005737,GO:0006629,GO:0008081,GO:0030246,GO:0046475,GO:0047389,GO:2001070	cytoplasm,lipid metabolic process,phosphoric diester hydrolase activity,carbohydrate binding,glycerophospholipid catabolic process,glycerophosphocholine phosphodiesterase activity,starch binding
LOC5567861	758.739	-0.890559	0.176091	-5.05738	4.25065e-07	1.57674e-05	AAEL006317	short-chain dehydrogenase [Source:VB Community Annotation]			GO:0004454,GO:0006000,GO:0016020,GO:0016021,GO:0046835,GO:0055114	ketohexokinase activity,fructose metabolic process,membrane,integral component of membrane,carbohydrate phosphorylation,oxidation-reduction process
LOC5577984	981.108	0.938538	0.185692	5.05428	4.32008e-07	1.59832e-05	AAEL013458	glutamine synthetase 1, 2 (glutamate-amonia ligase) (gs) [Source:VB Community Annotation]			GO:0000166,GO:0003824,GO:0004356,GO:0005524,GO:0006542,GO:0006807,GO:0016874	nucleotide binding,catalytic activity,glutamate-ammonia ligase activity,ATP binding,glutamine biosynthetic process,nitrogen compound metabolic process,ligase activity
LOC5571710	1056.99	-1.13895	0.22552	-5.05034	4.41029e-07	1.62746e-05	AAEL015573	glycoside hydrolases [Source:VB Community Annotation]			GO:0004553,GO:0005975	hydrolase activity, hydrolyzing O-glycosyl compounds,carbohydrate metabolic process
LOC5575552	536.318	1.03664	0.205422	5.04639	4.50235e-07	1.65712e-05	AAEL002675	Arginase [Source:UniProtKB/TrEMBL;Acc:Q17HI3]			GO:0000050,GO:0004053,GO:0006525,GO:0016787,GO:0046872	urea cycle,arginase activity,arginine metabolic process,hydrolase activity,metal ion binding
LOC23687754	1007.83	0.952999	0.189207	5.03681	4.73351e-07	1.7361e-05	AAEL017334				GO:0005576,GO:0006030,GO:0008061	extracellular region,chitin metabolic process,chitin binding
LOC110679624	2634	1.44161	0.286232	5.03649	4.74138e-07	1.7361e-05	AAEL020038
LOC5569608	1387.75	0.747411	0.14928	5.00677	5.53502e-07	2.01698e-05	AAEL001271
LOC110679374	2225.22	0.632309	0.126292	5.00671	5.53687e-07	2.01698e-05	AAEL026843
LOC5577062	1129.19	-0.703306	0.140643	-5.00065	5.71385e-07	2.07613e-05	AAEL026027				GO:0004857,GO:0004867,GO:0005576,GO:0010466,GO:0010951,GO:0030414,GO:0043086	enzyme inhibitor activity,serine-type endopeptidase inhibitor activity,extracellular region,negative regulation of peptidase activity,negative regulation of endopeptidase activity,peptidase inhibitor activity,negative regulation of catalytic activity
LOC5575327	210.692	0.882449	0.176591	4.99713	5.81884e-07	2.10889e-05	AAEL020706				GO:0004252,GO:0006508	serine-type endopeptidase activity,proteolysis
LOC5580324	111.167	-1.25344	0.25133	-4.98724	6.12478e-07	2.21412e-05	AAEL012903	sugar transporter [Source:VB Community Annotation]			GO:0016020,GO:0016021,GO:0022857,GO:0055085	membrane,integral component of membrane,transmembrane transporter activity,transmembrane transport
LOC5564288	98.2447	1.44565	0.289933	4.98616	6.15902e-07	2.22084e-05	AAEL014382	C-Type Lectin (CTL) - mannose binding. [Source:VB Community Annotation]	CTLMA14		GO:0030246	carbohydrate binding
LOC5571039	1218.11	-1.63175	0.327331	-4.985	6.19603e-07	2.22853e-05	AAEL008784	serine-type enodpeptidase, [Source:VB Community Annotation]			GO:0004252,GO:0006508,GO:0008233,GO:0008236,GO:0016787	serine-type endopeptidase activity,proteolysis,peptidase activity,serine-type peptidase activity,hydrolase activity
LOC5569339	1186.66	-0.663646	0.133171	-4.98341	6.24722e-07	2.24127e-05	AAEL007536	carnitine o-acyltransferase [Source:VB Community Annotation]			GO:0016740,GO:0016746	transferase activity,transferase activity, transferring acyl groups
LOC5575056	207.983	0.87317	0.175687	4.97004	6.69394e-07	2.39548e-05	AAEL011621	C-Type Lectin (CTL) - mannose binding. [Source:VB Community Annotation]	CTLMA13		GO:0004252,GO:0006508,GO:0030246	serine-type endopeptidase activity,proteolysis,carbohydrate binding
LOC5566925	3546.46	1.34639	0.271006	4.96812	6.7606e-07	2.41326e-05	AAEL005694				GO:0003824,GO:0006596	catalytic activity,polyamine biosynthetic process
LOC5571084	2864.37	1.13524	0.22874	4.96305	6.93963e-07	2.47096e-05	AAEL008789	apolipophorin-III, putative [Source:VB Community Annotation]			GO:0005576,GO:0006869,GO:0008289	extracellular region,lipid transport,lipid binding
LOC110674784	14.3328	-4.30428	0.86759	-4.96119	7.00612e-07	2.4884e-05	AAEL023705
LOC5580268	406.57	-0.999976	0.201737	-4.95682	7.16563e-07	2.53871e-05	AAEL027783
LOC5574205	140.735	-1.26005	0.254382	-4.95339	7.29322e-07	2.57748e-05	AAEL002307	leucine-rich transmembrane protein [Source:VB Community Annotation]			GO:0005515,GO:0016020,GO:0016021	protein binding,membrane,integral component of membrane
LOC5564828	83.8213	2.84123	0.575134	4.94012	7.80762e-07	2.75243e-05	AAEL025975
LOC5571998	174.096	0.98944	0.20049	4.9351	8.01102e-07	2.81714e-05	AAEL009474	Peptidoglycan Recognition Protein (Short) [Source:VB Community Annotation]	PGRPS1		GO:0002376,GO:0008270,GO:0008745,GO:0009253,GO:0042834,GO:0045087	immune system process,zinc ion binding,N-acetylmuramoyl-L-alanine amidase activity,peptidoglycan catabolic process,peptidoglycan binding,innate immune response
LOC5570918	158.413	-2.71138	0.550823	-4.92242	8.54806e-07	2.99857e-05	AAEL001498
LOC110676128	174.634	0.965862	0.19627	4.92109	8.60636e-07	3.01159e-05	AAEL026712
LOC110681328	2558.08	0.507126	0.103354	4.9067	9.26231e-07	3.23316e-05	AAEL023294				GO:0004869,GO:0006508,GO:0008234,GO:0010951	cysteine-type endopeptidase inhibitor activity,proteolysis,cysteine-type peptidase activity,negative regulation of endopeptidase activity
LOC110676552	16.2465	-5.52416	1.12657	-4.90353	9.41281e-07	3.27764e-05	AAEL024360
LOC5577184	1161.71	-0.544203	0.111122	-4.89733	9.71465e-07	3.37448e-05	AAEL013063	autophagy related gene [Source:VB Community Annotation]	APG18A		GO:0005515	protein binding
LOC5577126	429.489	0.660579	0.134921	4.89605	9.77816e-07	3.38825e-05	AAEL020720
LOC5577153	131.626	0.998992	0.204575	4.88326	1.04345e-06	3.60687e-05	AAEL013032				GO:0004252,GO:0006508,GO:0008233,GO:0008236,GO:0016787	serine-type endopeptidase activity,proteolysis,peptidase activity,serine-type peptidase activity,hydrolase activity
LOC5574204	1872.71	-0.560058	0.114786	-4.87913	1.06553e-06	3.66604e-05	AAEL002295	leucine-rich transmembrane protein [Source:VB Community Annotation]			GO:0005515,GO:0016020,GO:0016021	protein binding,membrane,integral component of membrane
LOC110676777	9.00143	-6.56063	1.34464	-4.8791	1.06572e-06	3.66604e-05	AAEL023937
LOC5569640	60.6248	2.12948	0.43722	4.87051	1.1131e-06	3.81975e-05	AAEL007793	alkyldihydroxyacetonephosphate synthase [Source:VB Community Annotation]			GO:0003824,GO:0005777,GO:0006629,GO:0008609,GO:0008610,GO:0008611,GO:0016491,GO:0016740,GO:0050660,GO:0055114,GO:0071949	catalytic activity,peroxisome,lipid metabolic process,alkylglycerone-phosphate synthase activity,lipid biosynthetic process,ether lipid biosynthetic process,oxidoreductase activity,transferase activity,flavin adenine dinucleotide binding,oxidation-reduction process,FAD binding
LOC110677878	108.443	-1.22664	0.251879	-4.86996	1.11622e-06	3.82125e-05	AAEL022459				GO:0005515	protein binding
LOC5565367	706.933	-1.12266	0.230644	-4.86752	1.1301e-06	3.85946e-05	AAEL004778	acyl-coa dehydrogenase [Source:VB Community Annotation]			GO:0003995,GO:0016491,GO:0016627,GO:0050660,GO:0055114	acyl-CoA dehydrogenase activity,oxidoreductase activity,oxidoreductase activity, acting on the CH-CH group of donors,flavin adenine dinucleotide binding,oxidation-reduction process
LOC5565942	1152.31	-0.601361	0.123559	-4.86698	1.13316e-06	3.86061e-05	AAEL019563				GO:0003677,GO:0003700,GO:0005634,GO:0006355	DNA binding,DNA-binding transcription factor activity,nucleus,regulation of transcription, DNA-templated
LOC5578094	1735.04	0.683002	0.140361	4.86603	1.13863e-06	3.86997e-05	AAEL003426	Sodium-dependent phosphate transporter [Source:UniProtKB/TrEMBL;Acc:A0A1S4F4Y8]			GO:0016020,GO:0016021,GO:0022857,GO:0055085	membrane,integral component of membrane,transmembrane transporter activity,transmembrane transport
LOC5567540	258.572	0.984678	0.202729	4.85711	1.19109e-06	4.03862e-05	AAEL006143				GO:0005515,GO:0016020,GO:0016021	protein binding,membrane,integral component of membrane
LOC5577359	829.881	-0.627436	0.129191	-4.85664	1.19393e-06	4.03862e-05	AAEL026240				GO:0016020,GO:0016021,GO:0016746	membrane,integral component of membrane,transferase activity, transferring acyl groups
LOC5566268	866.053	-0.611314	0.125992	-4.85203	1.22206e-06	4.12396e-05	AAEL019582
LOC110678537	197.287	1.0384	0.214211	4.84758	1.2498e-06	4.2068e-05	AAEL027776
LOC5575787	66.6099	-1.56419	0.322704	-4.84714	1.25254e-06	4.2068e-05	AAEL019844				GO:0003676,GO:0003723,GO:0003730,GO:0006417,GO:0045182	nucleic acid binding,RNA binding,mRNA 3'-UTR binding,regulation of translation,translation regulator activity
LOC5566613	508.873	-0.712854	0.147131	-4.84505	1.26581e-06	4.24135e-05	AAEL000757	anterior fat body protein [Source:VB Community Annotation]
LOC5569949	408.432	0.928587	0.191816	4.84103	1.29165e-06	4.31776e-05	AAEL008815				GO:0006629,GO:0016020,GO:0016021,GO:0016491,GO:0055114,GO:0080019,GO:0102965	lipid metabolic process,membrane,integral component of membrane,oxidoreductase activity,oxidation-reduction process,fatty-acyl-CoA reductase (alcohol-forming) activity,alcohol-forming fatty acyl-CoA reductase activity
LOC110675991	81.0103	1.35176	0.279818	4.83087	1.35935e-06	4.53339e-05	AAEL025683
LOC5565978	162.25	-1.21909	0.25244	-4.82922	1.37067e-06	4.56043e-05	AAEL027400				GO:0016020,GO:0016740,GO:0016757	membrane,transferase activity,transferase activity, transferring glycosyl groups
LOC5566724	1811.87	-0.776988	0.161605	-4.80796	1.52479e-06	5.06136e-05	AAEL005605	adenylsulphate kinase [Source:VB Community Annotation]	paps		GO:0000103,GO:0000166,GO:0004020,GO:0004781,GO:0005524,GO:0016310,GO:0016740,GO:0016779	sulfate assimilation,nucleotide binding,adenylylsulfate kinase activity,sulfate adenylyltransferase (ATP) activity,ATP binding,phosphorylation,transferase activity,nucleotidyltransferase activity
LOC5566204	2200.12	0.691217	0.143903	4.80337	1.56018e-06	5.16679e-05	AAEL027520				GO:0004888,GO:0004890,GO:0005216,GO:0005230,GO:0006811,GO:0016020,GO:0016021,GO:0034220	transmembrane signaling receptor activity,GABA-A receptor activity,ion channel activity,extracellular ligand-gated ion channel activity,ion transport,membrane,integral component of membrane,ion transmembrane transport
LOC5574853	56567.4	1.20788	0.251598	4.80081	1.58029e-06	5.2212e-05	AAEL011444	pupal cuticle protein, putative [Source:VB Community Annotation]			GO:0042302	structural constituent of cuticle
LOC5580221	15464.8	-1.07669	0.224388	-4.79835	1.59978e-06	5.27332e-05	AAEL011917	serine-type enodpeptidase, [Source:VB Community Annotation]			GO:0004252,GO:0006508	serine-type endopeptidase activity,proteolysis
LOC5570040	484.017	0.799897	0.166766	4.79654	1.61431e-06	5.30892e-05	AAEL000200				GO:0005576	extracellular region
LOC5565579	125.429	-1.75989	0.367007	-4.79526	1.62468e-06	5.33067e-05	AAEL014890	cytochrome P450 [Source:VB Community Annotation]	CYP6CC1		GO:0004497,GO:0005506,GO:0005789,GO:0016020,GO:0016021,GO:0016491,GO:0016705,GO:0020037,GO:0031090,GO:0046872,GO:0055114	monooxygenase activity,iron ion binding,endoplasmic reticulum membrane,membrane,integral component of membrane,oxidoreductase activity,oxidoreductase activity, acting on paired donors, with incorporation or reduction of molecular oxygen,heme binding,organelle membrane,metal ion binding,oxidation-reduction process
LOC5577717	2014.45	0.954637	0.199201	4.79234	1.64847e-06	5.39628e-05	AAEL013341	lethal(2)essential for life protein, l2efl [Source:VB Community Annotation]			GO:0005212,GO:0046872	structural constituent of eye lens,metal ion binding
LOC5571197	327.954	0.895326	0.186905	4.79028	1.66547e-06	5.42806e-05	AAEL008886				GO:0003677,GO:0005634,GO:0046872	DNA binding,nucleus,metal ion binding
LOC5565073	139.398	1.06447	0.222228	4.79	1.66785e-06	5.42806e-05	AAEL004582	beta-galactosidase [Source:VB Community Annotation]			GO:0004553,GO:0004565,GO:0005975,GO:0008152,GO:0016787,GO:0016798	hydrolase activity, hydrolyzing O-glycosyl compounds,beta-galactosidase activity,carbohydrate metabolic process,metabolic process,hydrolase activity,hydrolase activity, acting on glycosyl bonds
LOC23687458	136.258	-2.24981	0.46971	-4.78978	1.66964e-06	5.42806e-05	AAEL017038				GO:0016020,GO:0016021	membrane,integral component of membrane
LOC5568600	1146.79	0.863272	0.180297	4.78806	1.68399e-06	5.45341e-05	AAEL001102	adenosine kinase [Source:VB Community Annotation]			GO:0004001,GO:0006166,GO:0016301,GO:0016310,GO:0016740,GO:0016773,GO:0044209	adenosine kinase activity,purine ribonucleoside salvage,kinase activity,phosphorylation,transferase activity,phosphotransferase activity, alcohol group as acceptor,AMP salvage
LOC110675480	13.2591	-4.18261	0.873574	-4.78793	1.68512e-06	5.45341e-05	AAEL024718
LOC5572108	499.372	0.785991	0.164184	4.78726	1.6907e-06	5.45903e-05	AAEL024406				GO:0005515	protein binding
LOC110681201	314.102	-0.822267	0.171869	-4.78427	1.71614e-06	5.5286e-05	AAEL020314				GO:0032367	intracellular cholesterol transport
LOC5578104	1078.68	-0.726081	0.151797	-4.78323	1.72502e-06	5.54467e-05	AAEL003428				GO:0005515	protein binding
LOC5571531	490.315	-0.976831	0.204686	-4.77233	1.82107e-06	5.84016e-05	AAEL009120	cytochrome P450 [Source:VB Community Annotation]	CYP6S3		GO:0004497,GO:0005506,GO:0005789,GO:0016020,GO:0016491,GO:0016705,GO:0020037,GO:0031090,GO:0046872,GO:0055114	monooxygenase activity,iron ion binding,endoplasmic reticulum membrane,membrane,oxidoreductase activity,oxidoreductase activity, acting on paired donors, with incorporation or reduction of molecular oxygen,heme binding,organelle membrane,metal ion binding,oxidation-reduction process
LOC5571144	2552.49	-1.03528	0.217641	-4.75684	1.96642e-06	6.29211e-05	AAEL008841	acyl-CoA oxidase [Source:VB Community Annotation]			GO:0003997,GO:0005777,GO:0006631,GO:0006635,GO:0016491,GO:0016627,GO:0055114,GO:0071949	acyl-CoA oxidase activity,peroxisome,fatty acid metabolic process,fatty acid beta-oxidation,oxidoreductase activity,oxidoreductase activity, acting on the CH-CH group of donors,oxidation-reduction process,FAD binding
LOC110676813	103.18	-1.83796	0.386661	-4.75342	2.00001e-06	6.38521e-05	AAEL026592
LOC5579053	465.194	0.642054	0.135174	4.74982	2.03597e-06	6.48287e-05	AAEL013994				GO:0004843,GO:0005515,GO:0016579,GO:0030433,GO:0046872,GO:0101005,GO:1904265	thiol-dependent ubiquitin-specific protease activity,protein binding,protein deubiquitination,ubiquitin-dependent ERAD pathway,metal ion binding,ubiquitinyl hydrolase activity,GO_1904265
LOC5579906	728.325	0.613624	0.129199	4.74945	2.03973e-06	6.48287e-05	AAEL001037	ribosomal RNA methyltransferase [Source:VB Community Annotation]			GO:0000453,GO:0001510,GO:0005634,GO:0005730,GO:0006364,GO:0008168,GO:0008649,GO:0016740,GO:0031167,GO:0032259,GO:0042254	enzyme-directed rRNA 2'-O-methylation,RNA methylation,nucleus,nucleolus,rRNA processing,methyltransferase activity,rRNA methyltransferase activity,transferase activity,rRNA methylation,methylation,ribosome biogenesis
LOC5567105	144.308	-0.985463	0.207593	-4.7471	2.06355e-06	6.52058e-05	AAEL005827	katanin P80 subunit [Source:VB Community Annotation]			GO:0005515,GO:0005737,GO:0005856,GO:0008017,GO:0008352,GO:0051013	protein binding,cytoplasm,cytoskeleton,microtubule binding,katanin complex,microtubule severing
LOC110676778	87.0263	1.09855	0.231433	4.74674	2.06719e-06	6.52058e-05	AAEL020078
LOC5566511	3586.24	0.427748	0.0901147	4.74671	2.06751e-06	6.52058e-05	AAEL012522	Sodium-dependent phosphate transporter [Source:UniProtKB/TrEMBL;Acc:A0A1S4FWV3]			GO:0016020,GO:0016021,GO:0022857,GO:0055085	membrane,integral component of membrane,transmembrane transporter activity,transmembrane transport
LOC5580164	1760.22	0.578728	0.121928	4.74647	2.06995e-06	6.52058e-05	AAEL002557	cationic amino acid transporter [Source:VB Community Annotation]			GO:0016020,GO:0016021,GO:0022857,GO:0055085	membrane,integral component of membrane,transmembrane transporter activity,transmembrane transport
LOC5571310	17.3084	-3.01386	0.635895	-4.73956	2.14181e-06	6.732e-05	AAEL008943	chromatin assembly factor 1, p180-subunit, putative [Source:VB Community Annotation]
LOC5564549	143.064	0.980427	0.207049	4.73525	2.18788e-06	6.86164e-05	AAEL004317
LOC5578859	26.8582	-2.81615	0.594912	-4.73373	2.20426e-06	6.88564e-05	AAEL003724				GO:0016020,GO:0016021	membrane,integral component of membrane
LOC110681031	219.075	0.77061	0.162794	4.73365	2.20523e-06	6.88564e-05	AAEL025146				GO:0003824,GO:0004372,GO:0019264,GO:0030170,GO:0035999	catalytic activity,glycine hydroxymethyltransferase activity,glycine biosynthetic process from serine,pyridoxal phosphate binding,tetrahydrofolate interconversion
LOC5575197	82.7009	1.32237	0.279451	4.73203	2.22289e-06	6.92558e-05	AAEL024059
LOC5574040	16.6867	-6.47152	1.36837	-4.72935	2.25236e-06	7.00204e-05	AAEL010882
LOC5568625	27.3697	-3.72733	0.788957	-4.72438	2.30822e-06	7.16001e-05	AAEL006975	leucine aminopeptidase [Source:VB Community Annotation]			GO:0004177,GO:0005737,GO:0006508,GO:0008233,GO:0008235,GO:0016787,GO:0019538,GO:0030145,GO:0070006	aminopeptidase activity,cytoplasm,proteolysis,peptidase activity,metalloexopeptidase activity,hydrolase activity,protein metabolic process,manganese ion binding,metalloaminopeptidase activity
LOC5577690	85.5437	-2.79009	0.591151	-4.71976	2.36128e-06	7.30866e-05	AAEL013323
LOC5577620	400.985	0.813336	0.17248	4.71554	2.41066e-06	7.44527e-05	AAEL003245	IMD pathway signalling I-Kappa-B Kinase 1 (IKK1 IKK-beta). (ird5 orthologue immune response deficient 5) [Source:VB Community Annotation]	IKK1		GO:0004672,GO:0005524,GO:0006468	protein kinase activity,ATP binding,protein phosphorylation
LOC110675558	56.9443	1.42435	0.302355	4.71086	2.4667e-06	7.60181e-05	AAEL028195
LOC5576673	14973.6	-1.1275	0.239623	-4.7053	2.5349e-06	7.7951e-05	AAEL026023
LOC5570707	292.737	-0.693987	0.147558	-4.70315	2.56182e-06	7.86087e-05	AAEL001446	testis-specific protein pbs13 (t-complex 11 ) [Source:VB Community Annotation]
LOC5573715	224.212	1.03229	0.219533	4.7022	2.57368e-06	7.88023e-05	AAEL010694	5-formyltetrahydrofolate cyclo-ligase [Source:UniProtKB/TrEMBL;Acc:Q16S54]			GO:0000166,GO:0005524,GO:0030272,GO:0046872	nucleotide binding,ATP binding,5-formyltetrahydrofolate cyclo-ligase activity,metal ion binding
LOC5565248	24.4388	-4.45717	0.948107	-4.70113	2.5873e-06	7.90489e-05	AAEL014769	adult cuticle protein, putative [Source:VB Community Annotation]			GO:0042302	structural constituent of cuticle
LOC5569579	686.483	0.652241	0.138847	4.69755	2.63299e-06	8.02722e-05	AAEL007764	dipeptidyl-peptidase [Source:VB Community Annotation]			GO:0006508,GO:0008236	proteolysis,serine-type peptidase activity
LOC5570822	262.228	-0.889292	0.189338	-4.69684	2.64211e-06	8.03737e-05	AAEL008610	myosin vii [Source:VB Community Annotation]			GO:0000166,GO:0003774,GO:0003779,GO:0005515,GO:0005524,GO:0005737,GO:0005856,GO:0016459,GO:0051015	nucleotide binding,motor activity,actin binding,protein binding,ATP binding,cytoplasm,cytoskeleton,myosin complex,actin filament binding
LOC5566484	932.279	-0.706531	0.15044	-4.69642	2.64763e-06	8.03737e-05	AAEL005401				GO:0016020,GO:0016021,GO:0048037	membrane,integral component of membrane,obsolete cofactor binding
LOC5575325	301.461	0.795028	0.16932	4.69543	2.66049e-06	8.05919e-05	AAEL002580				GO:0004252,GO:0006508,GO:0008233	serine-type endopeptidase activity,proteolysis,peptidase activity
LOC5576221	4354.38	-0.578919	0.123307	-4.69495	2.66677e-06	8.06102e-05	AAEL002833	cathepsin l [Source:VB Community Annotation]			GO:0006508,GO:0008233,GO:0008234,GO:0016787	proteolysis,peptidase activity,cysteine-type peptidase activity,hydrolase activity
LOC5575053	172.83	1.21411	0.259027	4.6872	2.76968e-06	8.35433e-05	AAEL026265
LOC5568572	313.317	0.699712	0.149316	4.68613	2.78423e-06	8.3804e-05	AAEL001114	amino acid transporter [Source:VB Community Annotation]			GO:0016020,GO:0016021	membrane,integral component of membrane
LOC5569782	967.974	-0.617461	0.131963	-4.67905	2.88207e-06	8.65656e-05	AAEL007920
LOC5566931	8348.31	1.31551	0.281194	4.67831	2.89249e-06	8.66955e-05	AAEL005687	protein serine/threonine kinase, putative [Source:VB Community Annotation]
LOC5578955	2177.13	0.691733	0.14793	4.67607	2.92425e-06	8.74627e-05	AAEL013936	Serine Protease Inhibitor (serpin) likely cleavage at I/S. Transcript A. [Source:VB Community Annotation]	SRPN4		GO:0004867,GO:0005615,GO:0010466,GO:0010951,GO:0030414	serine-type endopeptidase inhibitor activity,extracellular space,negative regulation of peptidase activity,negative regulation of endopeptidase activity,peptidase inhibitor activity
LOC5576503	274.967	0.669497	0.143419	4.66813	3.03957e-06	9.07209e-05	AAEL012556	Ofd1 protein, putative [Source:VB Community Annotation]
LOC110678164	169.477	-4.64481	0.995536	-4.66564	3.07665e-06	9.1635e-05	AAEL027398
LOC5579163	88.1711	-1.15547	0.248467	-4.6504	3.31286e-06	9.8464e-05	AAEL003869
LOC5570268	5838.05	-0.97045	0.208713	-4.64968	3.32455e-06	9.86052e-05	AAEL008202	serine-type enodpeptidase, [Source:VB Community Annotation]			GO:0004252,GO:0006508	serine-type endopeptidase activity,proteolysis
LOC5577962	26.9473	2.2245	0.47889	4.64511	3.39896e-06	0.000100602	AAEL013442
LOC110680305	65.835	1.21226	0.26106	4.64359	3.42402e-06	0.000101133	AAEL023702
LOC110678413	1204.77	-5.43906	1.17173	-4.64189	3.45244e-06	0.000101761	AAEL027506
LOC110676788	21.7072	-5.34247	1.1517	-4.63877	3.50484e-06	0.000103092	AAEL023987				GO:0004177,GO:0005737,GO:0006508,GO:0008235,GO:0019538,GO:0030145	aminopeptidase activity,cytoplasm,proteolysis,metalloexopeptidase activity,protein metabolic process,manganese ion binding
LOC5571381	1293.23	-0.592667	0.127974	-4.63117	3.63601e-06	0.000106729	AAEL025929				GO:0004364,GO:0005515,GO:0005737	glutathione transferase activity,protein binding,cytoplasm
LOC5575504	1105.6	0.527134	0.113893	4.62832	3.68636e-06	0.000107984	AAEL011890
LOC5573156	2649.08	1.13839	0.246175	4.62431	3.75849e-06	0.00010987	AAEL001991	protein serine/threonine kinase, putative [Source:VB Community Annotation]
LOC5568916	6357.41	-0.541992	0.117302	-4.6205	3.82821e-06	0.000111678	AAEL019536				GO:0004177,GO:0006508,GO:0008233,GO:0008237,GO:0008270,GO:0016787,GO:0046872	aminopeptidase activity,proteolysis,peptidase activity,metallopeptidase activity,zinc ion binding,hydrolase activity,metal ion binding
LOC5579108	889.278	-0.646574	0.140028	-4.61747	3.88442e-06	0.000113086	AAEL003844	galectin [Source:VB Community Annotation]	GALE5		GO:0030246	carbohydrate binding
LOC5569079	7571.53	-0.952486	0.206372	-4.61538	3.92376e-06	0.000113998	AAEL001195	juvenile hormone-inducible protein, putative [Source:VB Community Annotation]
LOC5573297	1182.5	0.551008	0.119397	4.61494	3.93216e-06	0.000114009	AAEL026787				GO:0005506,GO:0005777,GO:0009055,GO:0016491,GO:0022900,GO:0046872,GO:0050660,GO:0051536,GO:0051537,GO:0055114,GO:0071949	iron ion binding,peroxisome,electron transfer activity,oxidoreductase activity,electron transport chain,metal ion binding,flavin adenine dinucleotide binding,iron-sulfur cluster binding,2 iron, 2 sulfur cluster binding,oxidation-reduction process,FAD binding
LOC5579962	270.307	0.892754	0.193801	4.60654	4.09422e-06	0.000118465	AAEL007597	Clip-Domain Serine Protease family C [Source:VB Community Annotation]	CLIPC3		GO:0004252,GO:0006508,GO:0008233,GO:0008236,GO:0016787	serine-type endopeptidase activity,proteolysis,peptidase activity,serine-type peptidase activity,hydrolase activity
LOC5570271	118.677	-1.05507	0.229572	-4.5958	4.31092e-06	0.00012433	AAEL008214	trypsin, putative [Source:VB Community Annotation]			GO:0004252,GO:0006508	serine-type endopeptidase activity,proteolysis
LOC5572002	127.343	-1.3811	0.300525	-4.59563	4.31441e-06	0.00012433	AAEL027371				GO:0004252,GO:0005515,GO:0006508,GO:0016020,GO:0016021	serine-type endopeptidase activity,protein binding,proteolysis,membrane,integral component of membrane
LOC110679201	43.0181	2.00995	0.437637	4.59275	4.37452e-06	0.000125807	AAEL025657
LOC110674097	708.505	-10.0125	2.18067	-4.59148	4.40115e-06	0.000126201	AAEL027763				GO:0004462,GO:0016829,GO:0046872	lactoylglutathione lyase activity,lyase activity,metal ion binding
LOC110676744	8.38689	-6.45456	1.40584	-4.59125	4.40597e-06	0.000126201	AAEL028104
LOC110675306	570.719	-0.782248	0.17081	-4.57964	4.65779e-06	0.000133145	AAEL023643				GO:0004252,GO:0006508	serine-type endopeptidase activity,proteolysis
LOC5576572	1574.88	-0.647408	0.141474	-4.57615	4.73605e-06	0.00013511	AAEL025570				GO:0000166,GO:0003774,GO:0003779,GO:0005515,GO:0005524,GO:0016459	nucleotide binding,motor activity,actin binding,protein binding,ATP binding,myosin complex
LOC5575311	9664.72	-0.845856	0.184862	-4.57562	4.74822e-06	0.000135186	AAEL002588				GO:0005576,GO:0006030,GO:0008061	extracellular region,chitin metabolic process,chitin binding
LOC5576563	130.094	0.991733	0.217272	4.56448	5.00726e-06	0.000142276	AAEL023505				GO:0004252,GO:0006508	serine-type endopeptidase activity,proteolysis
LOC110676297	5516.9	0.501455	0.109891	4.56319	5.03824e-06	0.000142871	AAEL027453				GO:0004550,GO:0006165,GO:0006183,GO:0006228,GO:0006241	nucleoside diphosphate kinase activity,nucleoside diphosphate phosphorylation,GTP biosynthetic process,UTP biosynthetic process,CTP biosynthetic process
LOC5564486	3897.04	-5.7455	1.25922	-4.56274	5.04912e-06	0.000142894	AAEL004280	Osiris, putative [Source:VB Community Annotation]			GO:0016020,GO:0016021	membrane,integral component of membrane
LOC5572566	898.529	1.43824	0.315323	4.56118	5.08662e-06	0.000143458	AAEL009888	sodium-coupled cation-chloride cotransporter [Source:VB Community Annotation]	CCC2		GO:0006811,GO:0015293,GO:0015377,GO:0016020,GO:0016021,GO:0022857,GO:0055085,GO:1902476	ion transport,symporter activity,cation:chloride symporter activity,membrane,integral component of membrane,transmembrane transporter activity,transmembrane transport,chloride transmembrane transport
LOC110679250	12.1081	-4.48477	0.983269	-4.56107	5.08924e-06	0.000143458	AAEL021408
LOC5565831	46.9361	-3.44348	0.755166	-4.55989	5.11793e-06	0.000143981	AAEL005024
LOC5576908	73.5366	1.42217	0.311961	4.55881	5.14431e-06	0.000144437	AAEL012853				GO:0016020,GO:0016021	membrane,integral component of membrane
LOC5571028	45.3114	-2.51832	0.552631	-4.55696	5.18998e-06	0.000145432	AAEL008752
LOC5571108	80.4246	-1.19919	0.263182	-4.55652	5.20079e-06	0.000145448	AAEL001524	rab23 [Source:VB Community Annotation]			GO:0003924,GO:0005525	GTPase activity,GTP binding
LOC5573908	1451.83	2.90575	0.637908	4.55512	5.23555e-06	0.000146132	AAEL002229	cuticle protein, putative [Source:VB Community Annotation]
LOC5573190	722.442	-0.560079	0.123012	-4.55306	5.28724e-06	0.000147286	AAEL001959
LOC5573295	1798.78	-0.92313	0.202912	-4.54942	5.37937e-06	0.000149559	AAEL010382	aldehyde oxidase [Source:VB Community Annotation]			GO:0005506,GO:0005777,GO:0009055,GO:0016491,GO:0022900,GO:0046872,GO:0050660,GO:0051536,GO:0051537,GO:0055114,GO:0071949	iron ion binding,peroxisome,electron transfer activity,oxidoreductase activity,electron transport chain,metal ion binding,flavin adenine dinucleotide binding,iron-sulfur cluster binding,2 iron, 2 sulfur cluster binding,oxidation-reduction process,FAD binding
LOC5565107	48.7303	1.48521	0.326719	4.54583	5.47193e-06	0.000151835	AAEL023691
LOC5577916	172.452	-0.962117	0.211742	-4.54381	5.5247e-06	0.000153001	AAEL003343				GO:0005515,GO:0046872	protein binding,metal ion binding
LOC5571189	2160.64	-0.743241	0.163945	-4.53349	5.8018e-06	0.000160362	AAEL008878	diacylglycerol o-acyltransferase [Source:VB Community Annotation]			GO:0005783,GO:0005789,GO:0016020,GO:0016021,GO:0016740,GO:0016746,GO:0016747	endoplasmic reticulum,endoplasmic reticulum membrane,membrane,integral component of membrane,transferase activity,transferase activity, transferring acyl groups,transferase activity, transferring acyl groups other than amino-acyl groups
LOC5570891	1682.09	0.60735	0.133991	4.53278	5.82129e-06	0.000160589	AAEL019935				GO:0005515	protein binding
LOC5574263	1504.69	1.49172	0.329415	4.52839	5.94352e-06	0.000163643	AAEL025248				GO:0042302	structural constituent of cuticle
LOC5566999	54.7234	1.73321	0.38339	4.52076	6.1617e-06	0.000169322	AAEL005748	elastase, putative [Source:VB Community Annotation]			GO:0004252,GO:0005576,GO:0006030,GO:0006508,GO:0008061	serine-type endopeptidase activity,extracellular region,chitin metabolic process,proteolysis,chitin binding
LOC5580214	509.745	-0.937145	0.207354	-4.51954	6.19752e-06	0.000169818	AAEL011918				GO:0006629,GO:0016042,GO:0016787	lipid metabolic process,lipid catabolic process,hydrolase activity
LOC5570664	1236.85	0.861663	0.190662	4.51933	6.20369e-06	0.000169818	AAEL008485
LOC5563938	2875.64	1.15381	0.255349	4.51857	6.22584e-06	0.000170097	AAEL014245
LOC5568468	479.393	0.658112	0.145738	4.51572	6.31013e-06	0.000172069	AAEL006887	mRNA turnover protein 4 mrt4 [Source:VB Community Annotation]			GO:0000027,GO:0005634,GO:0005730,GO:0005737,GO:0042254	ribosomal large subunit assembly,nucleus,nucleolus,cytoplasm,ribosome biogenesis
LOC23687710	2305.14	0.523135	0.115888	4.51412	6.35797e-06	0.000173041	AAEL017290	Coiled-coil domain-containing protein 72 homolog [Source:VB Community Annotation]
LOC110680817	126.867	-0.869752	0.192738	-4.51262	6.40316e-06	0.000173938	AAEL028163	Kinesin-like protein [Source:UniProtKB/TrEMBL;Acc:Q16RI3]
LOC5575673	351.441	2.01379	0.4464	4.51119	6.44642e-06	0.000174779	AAEL002696				GO:0004177,GO:0005634,GO:0006508,GO:0008233,GO:0008237,GO:0008270,GO:0016787,GO:0046872	aminopeptidase activity,nucleus,proteolysis,peptidase activity,metallopeptidase activity,zinc ion binding,hydrolase activity,metal ion binding
LOC5572744	453.63	-1.03555	0.229677	-4.50873	6.52169e-06	0.000176483	AAEL021667				GO:0005509,GO:0005886,GO:0007155,GO:0007156,GO:0016020	calcium ion binding,plasma membrane,cell adhesion,homophilic cell adhesion via plasma membrane adhesion molecules,membrane
LOC5573425	558.542	-1.70078	0.37752	-4.50513	6.6332e-06	0.000179159	AAEL019863				GO:0003677,GO:0003700,GO:0003707,GO:0004879,GO:0005634,GO:0006355,GO:0008270,GO:0030522,GO:0042025,GO:0043565,GO:0046872	DNA binding,DNA-binding transcription factor activity,steroid hormone receptor activity,nuclear receptor activity,nucleus,regulation of transcription, DNA-templated,zinc ion binding,intracellular receptor signaling pathway,host cell nucleus,sequence-specific DNA binding,metal ion binding
LOC110678697	12.6426	-3.78173	0.83993	-4.50244	6.71793e-06	0.000181104	AAEL026339
LOC110681488	46952	-0.942389	0.209459	-4.49916	6.8222e-06	0.000183566	AAEL026044	Sterol carrier protein 2 [Source:UniProtKB/TrEMBL;Acc:Q86PR3]
LOC5576402	381.309	-0.957563	0.212926	-4.49717	6.88654e-06	0.000184947	AAEL012496				GO:0000786,GO:0003677,GO:0005515,GO:0005634,GO:0046982	nucleosome,DNA binding,protein binding,nucleus,protein heterodimerization activity
LOC110675358	7.35544	6.39048	1.42331	4.48988	7.12618e-06	0.000191022	AAEL025157
LOC5566542	958.821	-0.678376	0.151775	-4.46961	7.83621e-06	0.000209659	AAEL005477	amidase [Source:VB Community Annotation]			GO:0005739	mitochondrion
LOC5570094	540.972	0.69272	0.155084	4.46673	7.94236e-06	0.0002121	AAEL001351
LOC110674263	4384.12	0.704985	0.158022	4.46132	8.14575e-06	0.000217123	AAEL023991
LOC5567927	519.065	0.854989	0.191672	4.46069	8.16947e-06	0.000217348	AAEL006372	sulphate transporter [Source:VB Community Annotation]			GO:0008271,GO:0008272,GO:0015116,GO:0016020,GO:0016021,GO:0055085,GO:1902358	secondary active sulfate transmembrane transporter activity,sulfate transport,sulfate transmembrane transporter activity,membrane,integral component of membrane,transmembrane transport,sulfate transmembrane transport
LOC5569780	7758.41	-0.611162	0.1371	-4.45777	8.2817e-06	0.000219878	AAEL007926	retinoid-inducible serine carboxypeptidase (serine carboxypeptidase [Source:VB Community Annotation]			GO:0004180,GO:0004185,GO:0006508,GO:0008233,GO:0016787	carboxypeptidase activity,serine-type carboxypeptidase activity,proteolysis,peptidase activity,hydrolase activity
LOC110675752	7.54355	-6.29907	1.41317	-4.45741	8.29555e-06	0.000219878	AAEL024959
LOC23687878	166.393	-1.30986	0.294043	-4.45465	8.40294e-06	0.00022231	AAEL017458				GO:0016020,GO:0016021,GO:0035461,GO:0051180,GO:0090482	membrane,integral component of membrane,vitamin transmembrane transport,vitamin transport,vitamin transmembrane transporter activity
LOC5564683	11.1759	6.01472	1.35072	4.45297	8.46901e-06	0.000223642	AAEL004388	heme peroxidase [Source:VB Community Annotation]	HPX8A		GO:0004601,GO:0006979,GO:0020037,GO:0048477,GO:0055114,GO:0098869	peroxidase activity,response to oxidative stress,heme binding,oogenesis,oxidation-reduction process,cellular oxidant detoxification
LOC5566825	1324.54	-1.51097	0.339366	-4.45234	8.49386e-06	0.000223882	AAEL021339
LOC5564398	19056	-1.10485	0.248338	-4.44899	8.62764e-06	0.000226987	AAEL004239
LOC110680199	902.243	-0.682461	0.153574	-4.44385	8.83641e-06	0.000231868	AAEL024807
LOC5567209	253.625	1.02375	0.230386	4.44362	8.84581e-06	0.000231868	AAEL000897				GO:0005515	protein binding
LOC5567814	945.153	-0.70768	0.159351	-4.44102	8.95329e-06	0.000234253	AAEL018150				GO:0016020,GO:0016021,GO:0022857,GO:0055085	membrane,integral component of membrane,transmembrane transporter activity,transmembrane transport
LOC5578300	669.319	1.28159	0.288656	4.43986	9.00188e-06	0.000235091	AAEL013612
LOC5565181	457.165	-1.06186	0.239325	-4.43691	9.12609e-06	0.000237898	AAEL004646	actin [Source:VB Community Annotation]
LOC5569668	383.392	-0.633786	0.142946	-4.43376	9.2604e-06	0.000240957	AAEL007811	short-chain dehydrogenase [Source:VB Community Annotation]			GO:0005515,GO:0006915,GO:0016055,GO:0055114	protein binding,apoptotic process,Wnt signaling pathway,oxidation-reduction process
LOC5563971	1220.16	-0.539789	0.121883	-4.42876	9.47767e-06	0.000246159	AAEL004023	juvenile hormone-inducible protein, putative [Source:VB Community Annotation]
LOC5574419	191.868	-0.965165	0.218001	-4.42734	9.54025e-06	0.000247333	AAEL018212	Ubiquitinyl hydrolase 1 [Source:UniProtKB/TrEMBL;Acc:A0A1S4G7V5]			GO:0004843,GO:0006511,GO:0008270,GO:0016579,GO:0036459,GO:0046872	thiol-dependent ubiquitin-specific protease activity,ubiquitin-dependent protein catabolic process,zinc ion binding,protein deubiquitination,thiol-dependent ubiquitinyl hydrolase activity,metal ion binding
LOC5570930	2519.95	-0.4024	0.0910163	-4.42119	9.81607e-06	0.00025402	AAEL008672	ABC transporter [Source:VB Community Annotation]			GO:0000166,GO:0005524,GO:0016020,GO:0016021,GO:0016887	nucleotide binding,ATP binding,membrane,integral component of membrane,ATPase activity
LOC5573148	1185.46	0.897031	0.203219	4.41411	1.01426e-05	0.000261993	AAEL002024	protein serine/threonine kinase, putative [Source:VB Community Annotation]
LOC5571175	1278.99	-1.13637	0.257588	-4.4116	1.02611e-05	0.000264573	AAEL008858	deoxyribonuclease I, putative [Source:VB Community Annotation]			GO:0003676,GO:0016787,GO:0046872	nucleic acid binding,hydrolase activity,metal ion binding
LOC110675610	1934.55	1.13237	0.256828	4.40907	1.03818e-05	0.000267199	AAEL026008
LOC110679840	172.082	-1.0183	0.231257	-4.4033	1.06619e-05	0.000273912	AAEL027183
LOC5570270	38.0615	-1.75139	0.397912	-4.40146	1.07527e-05	0.000275746	AAEL008212	serine collagenase 1 precursor, putative [Source:VB Community Annotation]			GO:0004252,GO:0006508,GO:0008233,GO:0008236,GO:0016787	serine-type endopeptidase activity,proteolysis,peptidase activity,serine-type peptidase activity,hydrolase activity
LOC5571859	343.646	0.739703	0.168139	4.39936	1.08571e-05	0.000277721	AAEL009338	C-Type Lectin (CTL). [Source:VB Community Annotation]	CTL10
LOC110673988	78.2629	1.38051	0.313816	4.39913	1.08688e-05	0.000277721	AAEL022454
LOC5577078	801.04	-0.742316	0.168871	-4.39575	1.10392e-05	0.000281569	AAEL012975				GO:0016020,GO:0016021	membrane,integral component of membrane
LOC110680721	185.638	-0.963363	0.21932	-4.3925	1.12055e-05	0.000284867	AAEL027351
LOC5574604	25932.3	0.525651	0.119686	4.39192	1.12352e-05	0.000284867	AAEL002417	troponin t, invertebrate [Source:VB Community Annotation]			GO:0005861,GO:0006937	troponin complex,regulation of muscle contraction
LOC5571211	325.607	-0.640618	0.145869	-4.39174	1.12447e-05	0.000284867	AAEL008894				GO:0016020,GO:0016021,GO:0016301,GO:0016310	membrane,integral component of membrane,kinase activity,phosphorylation
LOC5564748	260.515	-0.961374	0.218909	-4.39166	1.12487e-05	0.000284867	AAEL014619	cytochrome P450 [Source:VB Community Annotation]	CYP9J22		GO:0004497,GO:0005506,GO:0005789,GO:0016020,GO:0016021,GO:0016491,GO:0016705,GO:0020037,GO:0031090,GO:0046872,GO:0055114	monooxygenase activity,iron ion binding,endoplasmic reticulum membrane,membrane,integral component of membrane,oxidoreductase activity,oxidoreductase activity, acting on paired donors, with incorporation or reduction of molecular oxygen,heme binding,organelle membrane,metal ion binding,oxidation-reduction process
LOC110677757	83.8264	-1.01764	0.231935	-4.38759	1.14613e-05	0.000289734	AAEL027918				GO:0007186,GO:0016020,GO:0016021,GO:0019236	G protein-coupled receptor signaling pathway,membrane,integral component of membrane,response to pheromone
LOC23687629	93.5406	-1.803	0.410977	-4.38711	1.14868e-05	0.000289864	AAEL017209				GO:0000166,GO:0005524,GO:0016020,GO:0016021,GO:0016887,GO:0042626,GO:0055085	nucleotide binding,ATP binding,membrane,integral component of membrane,ATPase activity,ATPase-coupled transmembrane transporter activity,transmembrane transport
LOC5568456	601.79	0.487742	0.111199	4.38622	1.15337e-05	0.000290532	AAEL006867				GO:0000932,GO:0006402,GO:0030014	P-body,mRNA catabolic process,CCR4-NOT complex
LOC5575279	202.255	-0.76403	0.174225	-4.3853	1.15825e-05	0.000291243	AAEL014896				GO:0002224,GO:0004888,GO:0005515,GO:0006955,GO:0007165,GO:0016020,GO:0016021	toll-like receptor signaling pathway,transmembrane signaling receptor activity,protein binding,immune response,signal transduction,membrane,integral component of membrane
LOC5577714	14.591	4.07521	0.931181	4.37639	1.20662e-05	0.000302871	AAEL013338	lethal(2)essential for life protein, l2efl [Source:VB Community Annotation]			GO:0046872	metal ion binding
LOC5569805	314.333	2.00027	0.457196	4.37508	1.21389e-05	0.000304157	AAEL001323
LOC5566469	257.547	0.923896	0.211221	4.37406	1.21955e-05	0.000305039	AAEL005412	annexin x [Source:VB Community Annotation]			GO:0005509,GO:0005544	calcium ion binding,calcium-dependent phospholipid binding
LOC5576427	143.892	-0.862976	0.19735	-4.37283	1.22646e-05	0.000306226	AAEL012519	actin binding protein, putative [Source:VB Community Annotation]			GO:0003779,GO:0005737,GO:0005856,GO:0030036	actin binding,cytoplasm,cytoskeleton,actin cytoskeleton organization
LOC110680330	1616.17	0.480884	0.110124	4.36675	1.26109e-05	0.000314322	AAEL026634				GO:0003676	nucleic acid binding
LOC5572636	127.47	1.19143	0.272925	4.36543	1.26875e-05	0.000315676	AAEL020195				GO:0004180,GO:0004181,GO:0006508,GO:0008233,GO:0008237,GO:0008270,GO:0016787,GO:0046872	carboxypeptidase activity,metallocarboxypeptidase activity,proteolysis,peptidase activity,metallopeptidase activity,zinc ion binding,hydrolase activity,metal ion binding
LOC5571242	144.848	0.831946	0.191013	4.35544	1.32802e-05	0.000329846	AAEL008936
LOC5568347	118.099	-0.929697	0.213526	-4.35403	1.33655e-05	0.000331386	AAEL001059	glutathione S-transferase (GSTD3) [Source:VB Community Annotation]	GSTD3		GO:0005515	protein binding
LOC110675612	6762.64	-0.48018	0.110314	-4.35283	1.34394e-05	0.000332636	AAEL022334
LOC5576523	356.342	0.784878	0.18034	4.35222	1.34766e-05	0.000332977	AAEL012577
LOC5578865	197.476	-0.884849	0.203418	-4.34991	1.3619e-05	0.000335913	AAEL003722	ribonuclease UK114, putative [Source:VB Community Annotation]
LOC5568558	17873.5	0.595315	0.13688	4.34918	1.36645e-05	0.00033645	AAEL001134	Probable methylmalonate-semialdehyde dehydrogenase [acylating], mitochondrial Precursor (Malonate-semialdehyde dehydrogenase [acylating])(MMSDH)(EC 1.2.1.27)(EC 1.2.1.18) [Source:VB Community Annotation]			GO:0004491,GO:0005739,GO:0006573,GO:0016491,GO:0016620,GO:0018478,GO:0019859,GO:0055114	methylmalonate-semialdehyde dehydrogenase (acylating) activity,mitochondrion,valine metabolic process,oxidoreductase activity,oxidoreductase activity, acting on the aldehyde or oxo group of donors, NAD or NADP as acceptor,malonate-semialdehyde dehydrogenase (acetylating) activity,thymine metabolic process,oxidation-reduction process
LOC5579495	868.484	1.72127	0.395807	4.34876	1.3691e-05	0.00033652	AAEL015253				GO:0005576,GO:0006030,GO:0008061	extracellular region,chitin metabolic process,chitin binding
LOC110676144	179.01	2.07901	0.478221	4.34738	1.37773e-05	0.000338056	AAEL025773
LOC5576095	386.567	-0.60401	0.13911	-4.34197	1.41212e-05	0.000345897	AAEL002815				GO:0005794	Golgi apparatus
LOC5565247	59.2008	-6.78001	1.56223	-4.33997	1.42504e-05	0.000348459	AAEL014770				GO:0042302	structural constituent of cuticle
LOC5576440	1700.57	-0.633831	0.1461	-4.33832	1.43576e-05	0.000349784	AAEL005536	tetraspanin 29fb [Source:VB Community Annotation]			GO:0016020,GO:0016021	membrane,integral component of membrane
LOC5576735	73.0141	-3.29343	0.759185	-4.33812	1.43709e-05	0.000349784	AAEL018289				GO:0016020,GO:0016021	membrane,integral component of membrane
LOC5564943	241.637	-0.785669	0.181113	-4.338	1.43784e-05	0.000349784	AAEL004486	valacyclovir hydrolase [Source:VB Community Annotation]			GO:0016020,GO:0016021	membrane,integral component of membrane
LOC5571163	142.777	-1.13298	0.261277	-4.33632	1.44891e-05	0.000351874	AAEL008861	deoxyribonuclease I, putative [Source:VB Community Annotation]			GO:0003676,GO:0016787,GO:0046872	nucleic acid binding,hydrolase activity,metal ion binding
LOC5576203	373.897	-0.699656	0.161413	-4.33456	1.46053e-05	0.00035409	AAEL012398
LOC23687792	1847.19	1.23121	0.284146	4.33303	1.4707e-05	0.00035595	AAEL017372
LOC5573570	1771.72	-0.829863	0.191549	-4.33239	1.47501e-05	0.000356384	AAEL002133	juvenile hormone-inducible protein, putative [Source:VB Community Annotation]
LOC110679115	434.234	-0.803459	0.185499	-4.33133	1.48212e-05	0.000357496	AAEL024567
LOC110677716	40.6339	-1.74891	0.403853	-4.33057	1.48723e-05	0.000358119	AAEL027229
LOC5575349	648.952	1.07639	0.248599	4.32982	1.49233e-05	0.000358739	AAEL002624	serine protease [Source:VB Community Annotation]			GO:0004252,GO:0006508	serine-type endopeptidase activity,proteolysis
LOC5577626	983.412	-0.503183	0.116225	-4.32941	1.49513e-05	0.000358805	AAEL003210	tetraspanin 29fa [Source:VB Community Annotation]			GO:0016020,GO:0016021	membrane,integral component of membrane
LOC5568331	7360.22	0.56081	0.129583	4.32779	1.50615e-05	0.00036084	AAEL001094				GO:0046872	metal ion binding
LOC5566459	1392.43	-1.41127	0.326233	-4.32595	1.51879e-05	0.000363256	AAEL019639				GO:0004601,GO:0006979,GO:0020037,GO:0055114,GO:0098869	peroxidase activity,response to oxidative stress,heme binding,oxidation-reduction process,cellular oxidant detoxification
LOC5564942	819.15	-0.694354	0.160658	-4.32194	1.54662e-05	0.000369291	AAEL004507	valacyclovir hydrolase [Source:VB Community Annotation]
LOC5577138	275.812	1.03731	0.240038	4.32142	1.55027e-05	0.000369543	AAEL003111	tartan [Source:VB Community Annotation]			GO:0005515,GO:0016020,GO:0016021	protein binding,membrane,integral component of membrane
LOC5576801	8040.14	-0.876536	0.202902	-4.31999	1.56034e-05	0.000371318	AAEL012778	protease m1 zinc metalloprotease [Source:VB Community Annotation]	APN1		GO:0004177,GO:0006508,GO:0008233,GO:0008237,GO:0008270,GO:0016020,GO:0016021,GO:0016787,GO:0046872	aminopeptidase activity,proteolysis,peptidase activity,metallopeptidase activity,zinc ion binding,membrane,integral component of membrane,hydrolase activity,metal ion binding
LOC5576108	774.277	0.468184	0.108407	4.31875	1.56915e-05	0.000372792	AAEL002800	DNA polymerase epsilon, catalytic subunit [Source:VB Community Annotation]			GO:0000166,GO:0003676,GO:0003677,GO:0003887,GO:0005634,GO:0006260,GO:0006281,GO:0008270,GO:0008622,GO:0016740,GO:0016779,GO:0046872,GO:0051536,GO:0051539,GO:0071897	nucleotide binding,nucleic acid binding,DNA binding,DNA-directed DNA polymerase activity,nucleus,DNA replication,DNA repair,zinc ion binding,epsilon DNA polymerase complex,transferase activity,nucleotidyltransferase activity,metal ion binding,iron-sulfur cluster binding,4 iron, 4 sulfur cluster binding,DNA biosynthetic process
LOC5568441	8917.26	0.657531	0.152276	4.31803	1.57429e-05	0.000373389	AAEL006872	calponin/transgelin [Source:VB Community Annotation]			GO:0005515	protein binding
LOC5578688	194.142	1.04398	0.241872	4.31626	1.58694e-05	0.000375761	AAEL003628	Clip-Domain Serine Protease family B. [Source:VB Community Annotation]	CLIPB38		GO:0004252,GO:0006508,GO:0008233,GO:0008236,GO:0016787	serine-type endopeptidase activity,proteolysis,peptidase activity,serine-type peptidase activity,hydrolase activity
LOC5571393	130.455	-1.42665	0.33072	-4.31376	1.60498e-05	0.00037881	AAEL009036				GO:0016020,GO:0016021	membrane,integral component of membrane
LOC110678078	15.6059	2.81589	0.652771	4.31374	1.60515e-05	0.00037881	AAEL025126
LOC110678598	70.4238	-1.39736	0.324076	-4.31183	1.61908e-05	0.000381452	AAEL023190
LOC5566371	473.937	-0.553213	0.128312	-4.31146	1.62182e-05	0.000381452	AAEL005364	adaptin, alpha/gamma/epsilon [Source:VB Community Annotation]			GO:0005794,GO:0006886,GO:0015031,GO:0016020,GO:0016192,GO:0030117,GO:0030121,GO:0031410	Golgi apparatus,intracellular protein transport,protein transport,membrane,vesicle-mediated transport,membrane coat,AP-1 adaptor complex,cytoplasmic vesicle
LOC5576629	719.426	-0.711975	0.165149	-4.31111	1.6244e-05	0.000381452	AAEL012658	rgs-gaip interacting protein gipc [Source:VB Community Annotation]			GO:0005515	protein binding
LOC5569086	1128.57	-0.768594	0.178327	-4.31002	1.63241e-05	0.000382701	AAEL001220	myosin-VIIa (Protein crinkled) [Source:VB Community Annotation]	ck		GO:0000166,GO:0003774,GO:0003779,GO:0005515,GO:0005524,GO:0005737,GO:0005856,GO:0007605,GO:0008407,GO:0016459,GO:0030048,GO:0030898,GO:0032027,GO:0035317,GO:0048800,GO:0051015	nucleotide binding,motor activity,actin binding,protein binding,ATP binding,cytoplasm,cytoskeleton,sensory perception of sound,chaeta morphogenesis,myosin complex,actin filament-based movement,actin-dependent ATPase activity,myosin light chain binding,imaginal disc-derived wing hair organization,antennal morphogenesis,actin filament binding
LOC5575599	6198.43	-1.17409	0.272541	-4.30793	1.64787e-05	0.00038569	AAEL011935
LOC5568075	593.315	0.704488	0.16362	4.30563	1.66509e-05	0.000388839	AAEL006526	neurotransmitter gated ion channel [Source:VB Community Annotation]			GO:0004888,GO:0005216,GO:0005230,GO:0006811,GO:0016020,GO:0016021,GO:0034220	transmembrane signaling receptor activity,ion channel activity,extracellular ligand-gated ion channel activity,ion transport,membrane,integral component of membrane,ion transmembrane transport
LOC5576615	17.8753	2.39564	0.556425	4.3054	1.66681e-05	0.000388839	AAEL012650				GO:0005576,GO:0006030,GO:0008061	extracellular region,chitin metabolic process,chitin binding
LOC110676737	16.7846	-2.45427	0.570784	-4.29983	1.70929e-05	0.000398097	AAEL024439
LOC5565714	52.6671	-1.72239	0.400612	-4.29939	1.71269e-05	0.000398235	AAEL027202				GO:0005515	protein binding
LOC5573637	96.6246	-2.90465	0.676049	-4.29651	1.73505e-05	0.000402774	AAEL010627				GO:0016020,GO:0016021	membrane,integral component of membrane
LOC5566251	3744.96	-0.650144	0.151695	-4.28586	1.8203e-05	0.000421875	AAEL015110	dipeptidyl-peptidase [Source:VB Community Annotation]			GO:0006508,GO:0008236	proteolysis,serine-type peptidase activity
LOC5564448	130.262	-1.03074	0.240577	-4.28443	1.83209e-05	0.000423918	AAEL022427				GO:0016020,GO:0016021,GO:0022857,GO:0055085	membrane,integral component of membrane,transmembrane transporter activity,transmembrane transport
LOC5578119	532.705	-0.527564	0.1232	-4.28217	1.85081e-05	0.000427553	AAEL003412	nuclear lim interactor-interacting factor (nli-interacting factor) (nli-if) [Source:VB Community Annotation]			GO:0004721,GO:0006470,GO:0008420,GO:0016311,GO:0016787,GO:0016791	phosphoprotein phosphatase activity,protein dephosphorylation,RNA polymerase II CTD heptapeptide repeat phosphatase activity,dephosphorylation,hydrolase activity,phosphatase activity
LOC110678719	12.4166	-3.21573	0.75189	-4.27686	1.89545e-05	0.000437155	AAEL020672
LOC5573538	1758.09	-0.730645	0.170973	-4.27346	1.92466e-05	0.000442977	AAEL010582	glutathione transferase [Source:VB Community Annotation]	GSTD11		GO:0005515,GO:0016740	protein binding,transferase activity
LOC5570364	1249.77	-0.829407	0.194095	-4.27319	1.92693e-05	0.000442977	AAEL008271	SEC14, putative [Source:VB Community Annotation]
LOC5568403	7142.24	-0.685722	0.160667	-4.26797	1.97256e-05	0.000452733	AAEL006820	lipid storage droplets surface binding protein 2 (lsd2) [Source:VB Community Annotation]
LOC5570789	820.149	-0.922462	0.216236	-4.266	1.99011e-05	0.000456024	AAEL008560	glucosyl/glucuronosyl transferases [Source:VB Community Annotation]			GO:0008194,GO:0015020,GO:0016020,GO:0016021,GO:0016740,GO:0016757,GO:0016758	UDP-glycosyltransferase activity,glucuronosyltransferase activity,membrane,integral component of membrane,transferase activity,transferase activity, transferring glycosyl groups,transferase activity, transferring hexosyl groups
LOC5573151	970.899	0.931096	0.218475	4.26179	2.02793e-05	0.000463942	AAEL002041	protein serine/threonine kinase, putative [Source:VB Community Annotation]
LOC5575605	8022.56	-0.925116	0.217116	-4.26092	2.03583e-05	0.000465002	AAEL011930
LOC5570039	234.312	1.1199	0.262856	4.2605	2.03971e-05	0.000465139	AAEL000165				GO:0005576	extracellular region
LOC5574756	639.216	1.40668	0.330436	4.25705	2.07145e-05	0.000471619	AAEL022809
LOC5569240	455.247	-0.854313	0.200791	-4.25474	2.09288e-05	0.000475736	AAEL024535				GO:0005509,GO:0005886,GO:0007155,GO:0007156,GO:0016020,GO:0016021,GO:0098609	calcium ion binding,plasma membrane,cell adhesion,homophilic cell adhesion via plasma membrane adhesion molecules,membrane,integral component of membrane,cell-cell adhesion
LOC5568633	7210.68	-0.704359	0.165655	-4.25196	2.11911e-05	0.00048093	AAEL007023	estradiol 17 beta-dehydrogenase [Source:VB Community Annotation]			GO:0005777,GO:0006635,GO:0016491,GO:0055114	peroxisome,fatty acid beta-oxidation,oxidoreductase activity,oxidation-reduction process
LOC5568392	119.054	-0.955144	0.224678	-4.25117	2.1266e-05	0.00048186	AAEL006772				GO:0000070,GO:0005634,GO:0007049,GO:0007062,GO:0016407,GO:0016740,GO:0016746,GO:0045132,GO:0046872	mitotic sister chromatid segregation,nucleus,cell cycle,sister chromatid cohesion,acetyltransferase activity,transferase activity,transferase activity, transferring acyl groups,meiotic chromosome segregation,metal ion binding
LOC5579988	51.4956	-1.69625	0.399284	-4.24822	2.15478e-05	0.000487466	AAEL001732	candidate tumor suppressor protein [Source:VB Community Annotation]			GO:0008299,GO:0016740	isoprenoid biosynthetic process,transferase activity
LOC5574952	3236.62	0.692256	0.163112	4.24406	2.19513e-05	0.000495398	AAEL011557	metalloproteinase, putative [Source:VB Community Annotation]			GO:0004222,GO:0006508,GO:0008233,GO:0008237,GO:0008270,GO:0016787,GO:0046872	metalloendopeptidase activity,proteolysis,peptidase activity,metallopeptidase activity,zinc ion binding,hydrolase activity,metal ion binding
LOC5569925	4448.06	-0.580785	0.136852	-4.24389	2.19681e-05	0.000495398	AAEL027654				GO:0016020,GO:0016021,GO:0016491,GO:0055114	membrane,integral component of membrane,oxidoreductase activity,oxidation-reduction process
LOC5578348	926.065	0.651046	0.153532	4.24045	2.23068e-05	0.000501789	AAEL003548	sulphate transporter [Source:VB Community Annotation]			GO:0008271,GO:0008272,GO:0015116,GO:0016020,GO:0016021,GO:0055085,GO:1902358	secondary active sulfate transmembrane transporter activity,sulfate transport,sulfate transmembrane transporter activity,membrane,integral component of membrane,transmembrane transport,sulfate transmembrane transport
LOC5567077	770.138	1.04657	0.246827	4.24008	2.23436e-05	0.000501789	AAEL005792	Clip-Domain Serine Protease family E. Protease homologue. [Source:VB Community Annotation]	CLIPE8		GO:0004252,GO:0006508,GO:0008233	serine-type endopeptidase activity,proteolysis,peptidase activity
LOC5572878	23.7454	-2.10958	0.497549	-4.23994	2.23575e-05	0.000501789	AAEL020040
LOC5571410	48.2832	-1.28786	0.303922	-4.23746	2.26066e-05	0.000506581	AAEL009050	amine oxidase [Source:VB Community Annotation]			GO:0016491,GO:0055114	oxidoreductase activity,oxidation-reduction process
LOC5566977	316.973	-0.602561	0.142241	-4.2362	2.27332e-05	0.000508245	AAEL005739				GO:0005515,GO:0016020,GO:0016021	protein binding,membrane,integral component of membrane
LOC5569131	1376.07	0.518846	0.122485	4.23601	2.27524e-05	0.000508245	AAEL028220				GO:0003712,GO:0005634,GO:0006357,GO:0016592	transcription coregulator activity,nucleus,regulation of transcription by RNA polymerase II,mediator complex
LOC5570890	153.599	-1.04717	0.247373	-4.23315	2.30442e-05	0.000513953	AAEL008663	aldo-keto reductase [Source:VB Community Annotation]
LOC110675413	6.07058	-5.99167	1.41813	-4.22504	2.38895e-05	0.000531972	AAEL025767
LOC5571544	296.195	-0.681848	0.161414	-4.22421	2.39779e-05	0.000533105	AAEL009129	cytochrome P450 [Source:VB Community Annotation]	CYP6Z9		GO:0004497,GO:0005506,GO:0016491,GO:0016705,GO:0020037,GO:0046872,GO:0055114	monooxygenase activity,iron ion binding,oxidoreductase activity,oxidoreductase activity, acting on paired donors, with incorporation or reduction of molecular oxygen,heme binding,metal ion binding,oxidation-reduction process
LOC5565721	665.753	0.661289	0.156653	4.22137	2.42824e-05	0.000539031	AAEL004957				GO:0016020,GO:0016021	membrane,integral component of membrane
LOC5580098	129.624	-0.828865	0.196609	-4.2158	2.489e-05	0.000551656	AAEL002142
LOC5573491	72.5646	-1.12448	0.266781	-4.21501	2.49771e-05	0.000552726	AAEL010536	alpha-amylase [Source:VB Community Annotation]			GO:0003824,GO:0005975,GO:0008152,GO:0016798	catalytic activity,carbohydrate metabolic process,metabolic process,hydrolase activity, acting on glycosyl bonds
LOC5574554	3633.02	-1.52614	0.362155	-4.21405	2.50832e-05	0.000554211	AAEL011230	chymotrypsin, putative [Source:VB Community Annotation]			GO:0004252,GO:0006508	serine-type endopeptidase activity,proteolysis
LOC110674601	5.94153	-5.9597	1.4151	-4.21151	2.53669e-05	0.000559607	AAEL027966
LOC110679821	9.49701	4.25057	1.00952	4.21049	2.54814e-05	0.000560788	AAEL025531
LOC5568941	802.078	0.438754	0.10421	4.21027	2.55062e-05	0.000560788	AAEL007235	mitochondrial uncoupling protein [Source:VB Community Annotation]			GO:0006839,GO:0016020,GO:0016021,GO:0022857,GO:0031966	mitochondrial transport,membrane,integral component of membrane,transmembrane transporter activity,mitochondrial membrane
LOC5570819	2823.56	0.563132	0.133761	4.20998	2.55388e-05	0.000560788	AAEL008607	tep3 [Source:VB Community Annotation]			GO:0004866,GO:0005576,GO:0005615,GO:0010951	endopeptidase inhibitor activity,extracellular region,extracellular space,negative regulation of endopeptidase activity
LOC5574154	97.447	-2.28078	0.541907	-4.20879	2.56737e-05	0.000562879	AAEL019615
LOC5564273	940.465	-0.965422	0.2299	-4.19931	2.67725e-05	0.000586066	AAEL014371	glucosyl/glucuronosyl transferases [Source:VB Community Annotation]			GO:0008194,GO:0015020,GO:0016020,GO:0016021,GO:0016740,GO:0016757,GO:0016758	UDP-glycosyltransferase activity,glucuronosyltransferase activity,membrane,integral component of membrane,transferase activity,transferase activity, transferring glycosyl groups,transferase activity, transferring hexosyl groups
LOC5572723	387.195	-0.837511	0.199526	-4.1975	2.69883e-05	0.000589881	AAEL009991	myosin iii [Source:VB Community Annotation]			GO:0000166,GO:0003774,GO:0003779,GO:0004672,GO:0005515,GO:0005524,GO:0005856,GO:0006468,GO:0007601,GO:0016459,GO:0050896	nucleotide binding,motor activity,actin binding,protein kinase activity,protein binding,ATP binding,cytoskeleton,protein phosphorylation,visual perception,myosin complex,response to stimulus
LOC5580231	60322	0.601236	0.143429	4.19188	2.76658e-05	0.00060376	AAEL012207	myosin light chain 1, [Source:VB Community Annotation]			GO:0005509	calcium ion binding
LOC5566582	153.104	1.3604	0.324839	4.18793	2.81512e-05	0.000613411	AAEL000786
LOC110676890	12.3341	-3.21364	0.767568	-4.18678	2.82941e-05	0.000615582	AAEL025424
LOC5574852	183.116	1.08846	0.260003	4.18632	2.83511e-05	0.000615877	AAEL026338				GO:0042302	structural constituent of cuticle
LOC5565550	161.096	-0.90525	0.216333	-4.18453	2.85762e-05	0.000619819	AAEL004854				GO:0005634,GO:0005737	nucleus,cytoplasm
LOC5575865	1250.27	-0.722785	0.172784	-4.18316	2.87481e-05	0.000622598	AAEL012135	Galectin [Source:UniProtKB/TrEMBL;Acc:Q16MZ7]	GALE2		GO:0030246	carbohydrate binding
LOC5565997	522.013	-4.00916	0.95852	-4.18266	2.88116e-05	0.000623023	AAEL009588	expressed protein (HR3) [Source:VB Community Annotation]			GO:0003677,GO:0003700,GO:0003707,GO:0004879,GO:0005634,GO:0006355,GO:0008270,GO:0030522,GO:0042025,GO:0043565,GO:0046872	DNA binding,DNA-binding transcription factor activity,steroid hormone receptor activity,nuclear receptor activity,nucleus,regulation of transcription, DNA-templated,zinc ion binding,intracellular receptor signaling pathway,host cell nucleus,sequence-specific DNA binding,metal ion binding
LOC5566521	2032.42	-0.736205	0.176152	-4.17936	2.92326e-05	0.000631167	AAEL005458	protein withered, carnitine O-palmitoyltransferase [Source:VB Community Annotation]	whd		GO:0004095,GO:0005739,GO:0005741,GO:0006629,GO:0006631,GO:0006635,GO:0016020,GO:0016021,GO:0016740,GO:0016746	carnitine O-palmitoyltransferase activity,mitochondrion,mitochondrial outer membrane,lipid metabolic process,fatty acid metabolic process,fatty acid beta-oxidation,membrane,integral component of membrane,transferase activity,transferase activity, transferring acyl groups
LOC5565756	401.459	0.635863	0.152337	4.17405	2.99237e-05	0.00064441	AAEL004997	U3 small nucleolar ribonucleoprotein protein imp4 [Source:VB Community Annotation]
LOC5566926	127.681	1.51302	0.362491	4.17395	2.99367e-05	0.00064441	AAEL005710	protein serine/threonine kinase, putative [Source:VB Community Annotation]
LOC5565021	318.657	-1.08191	0.259288	-4.1726	3.01137e-05	0.000647239	AAEL014700	sugar transporter [Source:VB Community Annotation]			GO:0016020,GO:0016021,GO:0022857,GO:0055085	membrane,integral component of membrane,transmembrane transporter activity,transmembrane transport
LOC5566454	153.759	-0.83301	0.199823	-4.16874	3.06291e-05	0.000657323	AAEL014176	cornichon [Source:VB Community Annotation]
LOC5566132	471.359	0.599849	0.143973	4.1664	3.09451e-05	0.000663102	AAEL018333				GO:0016020,GO:0016021	membrane,integral component of membrane
LOC110678457	47.4135	2.10471	0.50537	4.1647	3.11766e-05	0.000667057	AAEL019842				GO:0016788	hydrolase activity, acting on ester bonds
LOC5564510	555.178	-0.8471	0.203494	-4.16277	3.14408e-05	0.000671699	AAEL004278				GO:0006629,GO:0016020,GO:0016021,GO:0016491,GO:0020037,GO:0046872	lipid metabolic process,membrane,integral component of membrane,oxidoreductase activity,heme binding,metal ion binding
LOC5572681	16931.7	0.516113	0.124127	4.15794	3.21125e-05	0.000684905	AAEL009955				GO:0005319,GO:0006869	lipid transporter activity,lipid transport
LOC5567119	400.449	0.566418	0.136245	4.15735	3.21955e-05	0.000684905	AAEL022263				GO:0005044,GO:0005507,GO:0005576,GO:0006897,GO:0016020,GO:0016641,GO:0055114	scavenger receptor activity,copper ion binding,extracellular region,endocytosis,membrane,oxidoreductase activity, acting on the CH-NH2 group of donors, oxygen as acceptor,oxidation-reduction process
LOC110674132	15.056	-2.79133	0.67143	-4.1573	3.22036e-05	0.000684905	AAEL024749				GO:0005515	protein binding
LOC5567534	591.103	-3.31255	0.796987	-4.15634	3.23383e-05	0.000686742	AAEL006122
LOC5567473	260.974	-1.20628	0.290295	-4.15537	3.2476e-05	0.000688637	AAEL000931	Alkaline phosphatase [Source:UniProtKB/TrEMBL;Acc:Q1HQK7]			GO:0003824,GO:0004035,GO:0016311,GO:0016787,GO:0016791,GO:0031225	catalytic activity,alkaline phosphatase activity,dephosphorylation,hydrolase activity,phosphatase activity,anchored component of membrane
LOC5574951	2651.4	0.707655	0.170368	4.15368	3.27175e-05	0.000692723	AAEL011543	metalloproteinase, putative [Source:VB Community Annotation]			GO:0004222,GO:0006508,GO:0008233,GO:0008237,GO:0008270,GO:0016787,GO:0046872	metalloendopeptidase activity,proteolysis,peptidase activity,metallopeptidase activity,zinc ion binding,hydrolase activity,metal ion binding
LOC5575085	4867.78	-0.59758	0.143916	-4.15229	3.29171e-05	0.000695912	AAEL011641	transferrin [Source:VB Community Annotation]			GO:0005615,GO:0016020,GO:0016021	extracellular space,membrane,integral component of membrane
LOC5564469	3588.1	-0.558724	0.134754	-4.14626	3.37949e-05	0.000713409	AAEL014452	acyl-coa dehydrogenase [Source:VB Community Annotation]			GO:0003995,GO:0016491,GO:0016627,GO:0050660,GO:0055114	acyl-CoA dehydrogenase activity,oxidoreductase activity,oxidoreductase activity, acting on the CH-CH group of donors,flavin adenine dinucleotide binding,oxidation-reduction process
LOC110675616	309.278	-0.703473	0.169766	-4.14377	3.41644e-05	0.000719185	AAEL023898
LOC5565345	2943.83	2.37861	0.574026	4.14373	3.41698e-05	0.000719185	AAEL014835
LOC110680390	184.052	-0.963482	0.232838	-4.138	3.50354e-05	0.000736313	AAEL027762				GO:0015267,GO:0016020,GO:0055085	channel activity,membrane,transmembrane transport
LOC5571857	179.643	0.737563	0.178355	4.13536	3.54399e-05	0.000743714	AAEL009334				GO:0000166,GO:0005524,GO:0006139,GO:0016301,GO:0016310,GO:0016740,GO:0019205	nucleotide binding,ATP binding,nucleobase-containing compound metabolic process,kinase activity,phosphorylation,transferase activity,nucleobase-containing compound kinase activity
LOC5568910	359.674	-0.68252	0.165066	-4.13482	3.5523e-05	0.000744359	AAEL007202	Hormone receptor-like in 96 nuclear receptor [Source:VB Community Annotation]	HR96		GO:0003677,GO:0003700,GO:0005634,GO:0006355,GO:0008270,GO:0042025,GO:0043565,GO:0046872	DNA binding,DNA-binding transcription factor activity,nucleus,regulation of transcription, DNA-templated,zinc ion binding,host cell nucleus,sequence-specific DNA binding,metal ion binding
LOC23687722	41.458	2.06337	0.499296	4.13255	3.58756e-05	0.000749754	AAEL017302	Farnesol dehydrogenase [Source:UniProtKB/TrEMBL;Acc:A0A2K7P6E4]			GO:0006718,GO:0016491,GO:0047886,GO:0055114	juvenile hormone biosynthetic process,oxidoreductase activity,farnesol dehydrogenase activity,oxidation-reduction process
LOC5569872	73.2474	-2.44903	0.59263	-4.13249	3.5886e-05	0.000749754	AAEL025229				GO:0031409	pigment binding
LOC5569568	238.846	0.925599	0.224153	4.12932	3.63834e-05	0.000759028	AAEL007762	mitochondrial ribosomal protein, L40, putative [Source:VB Community Annotation]	mRpL40		GO:0005739,GO:0005762,GO:0005840	mitochondrion,mitochondrial large ribosomal subunit,ribosome
LOC5565301	2049.55	-0.648367	0.157092	-4.12732	3.67017e-05	0.000764547	AAEL004715	b-cell translocation protein [Source:VB Community Annotation]
LOC110681396	26.0513	1.87658	0.455043	4.12396	3.72411e-05	0.000774647	AAEL027220
LOC110678865	27.0337	1.84545	0.447588	4.1231	3.73814e-05	0.000775837	AAEL028193
LOC5576843	156.261	-0.798853	0.193758	-4.12294	3.74075e-05	0.000775837	AAEL012823	n-acetylgalactosaminyltransferase [Source:VB Community Annotation]			GO:0000139,GO:0005794,GO:0006486,GO:0016020,GO:0016021,GO:0016740,GO:0016757,GO:0030246	Golgi membrane,Golgi apparatus,protein glycosylation,membrane,integral component of membrane,transferase activity,transferase activity, transferring glycosyl groups,carbohydrate binding
LOC110679222	47.4293	1.50441	0.365497	4.11607	3.85384e-05	0.000798127	AAEL024864
LOC5577765	3524.1	-0.796063	0.193434	-4.11541	3.86485e-05	0.000799242
LOC5577773	1730.75	1.5662	0.380839	4.11249	3.91422e-05	0.000808275	AAEL027086
LOC5564135	1852.6	0.51416	0.125103	4.10991	3.95819e-05	0.000815047	AAEL004098	neuromusculin [Source:VB Community Annotation]
LOC5570365	93.9792	-1.34185	0.326494	-4.10989	3.95849e-05	0.000815047	AAEL008281
LOC5567008	595.012	-0.582515	0.141857	-4.10636	4.0194e-05	0.000825475	AAEL005754	cgmp-dependent protein kinase [Source:VB Community Annotation]			GO:0000166,GO:0004672,GO:0004674,GO:0004692,GO:0005524,GO:0006468,GO:0016301,GO:0016310,GO:0016740,GO:0030553	nucleotide binding,protein kinase activity,protein serine/threonine kinase activity,cGMP-dependent protein kinase activity,ATP binding,protein phosphorylation,kinase activity,phosphorylation,transferase activity,cGMP binding
LOC5575218	296.733	0.644542	0.156965	4.10628	4.02076e-05	0.000825475	AAEL011696				GO:0005515,GO:0005730,GO:0042273	protein binding,nucleolus,ribosomal large subunit biogenesis
LOC5567352	498.116	-0.922934	0.224834	-4.10496	4.04377e-05	0.000829002	AAEL006034	Vanin-like protein 1 precursor, putative [Source:VB Community Annotation]			GO:0006807,GO:0016787,GO:0016811	nitrogen compound metabolic process,hydrolase activity,hydrolase activity, acting on carbon-nitrogen (but not peptide) bonds, in linear amides
LOC110676888	374.976	0.566097	0.137928	4.10428	4.05572e-05	0.000830255	AAEL025416				GO:0030431,GO:0032222,GO:1903818	sleep,regulation of synaptic transmission, cholinergic,positive regulation of voltage-gated potassium channel activity
LOC5564121	164.955	0.744813	0.181642	4.10045	4.1234e-05	0.000842895	AAEL004090				GO:0016020,GO:0016021	membrane,integral component of membrane
LOC5568444	28559.8	0.500868	0.12218	4.09943	4.14175e-05	0.000845357	AAEL019799	Muscle lim protein [Source:UniProtKB/TrEMBL;Acc:A0A1S4FES9]			GO:0046872	metal ion binding
LOC5565221	817.766	-0.834024	0.203464	-4.09911	4.14735e-05	0.000845357	AAEL004682				GO:0005737,GO:0120009,GO:0120013	cytoplasm,intermembrane lipid transfer,lipid transfer activity
LOC5572570	62.5471	1.51039	0.36853	4.09842	4.15986e-05	0.000846321	AAEL025471				GO:0005179,GO:0005576	hormone activity,extracellular region
LOC5570086	170.026	0.911708	0.222466	4.09819	4.16399e-05	0.000846321	AAEL001328				GO:0016020,GO:0016021	membrane,integral component of membrane
LOC5567446	829.734	0.980648	0.239484	4.09484	4.22457e-05	0.000857407	AAEL006102	gelsolin precursor [Source:VB Community Annotation]			GO:0051015	actin filament binding
LOC5565513	3462.82	0.546971	0.133601	4.09406	4.23891e-05	0.000859091	AAEL014863	glycogenin [Source:VB Community Annotation]			GO:0016757	transferase activity, transferring glycosyl groups
LOC5575471	1627.58	-0.49099	0.11999	-4.09191	4.27835e-05	0.000865847	AAEL011848				GO:0016020,GO:0016021	membrane,integral component of membrane
LOC5575994	243.902	0.62794	0.153516	4.0904	4.30634e-05	0.000870273	AAEL023229				GO:0004252,GO:0005515,GO:0006508	serine-type endopeptidase activity,protein binding,proteolysis
LOC5568477	356.483	1.3806	0.337733	4.08784	4.35411e-05	0.000878676	AAEL006883				GO:0005634,GO:0051726	nucleus,regulation of cell cycle
LOC5577431	70.5043	-1.14804	0.281302	-4.08117	4.48105e-05	0.000902556	AAEL013174
LOC5580182	539.414	-0.875298	0.214484	-4.08095	4.48514e-05	0.000902556	AAEL002560
LOC5565111	3468.19	0.974683	0.239022	4.0778	4.54645e-05	0.000913599	AAEL004588				GO:0042302	structural constituent of cuticle
LOC5573631	9.1856	-6.58621	1.61547	-4.07695	4.56296e-05	0.000915622	AAEL010631				GO:0016020,GO:0016021	membrane,integral component of membrane
LOC5574694	163.247	-1.04191	0.255621	-4.07601	4.58142e-05	0.000918028	AAEL011335				GO:0005576,GO:0006030,GO:0008061	extracellular region,chitin metabolic process,chitin binding
LOC5571718	139.358	-0.775379	0.190266	-4.07523	4.59692e-05	0.000919837	AAEL009235				GO:0003676	nucleic acid binding
LOC5566986	939.067	-0.521052	0.127875	-4.07471	4.6072e-05	0.000920597	AAEL005734	leucine-rich transmembrane protein [Source:VB Community Annotation]			GO:0005515,GO:0016020,GO:0016021	protein binding,membrane,integral component of membrane
LOC5573913	1304.56	2.80643	0.688933	4.07358	4.62957e-05	0.000923769	AAEL002191	cuticle protein, putative [Source:VB Community Annotation]
LOC5565497	612.553	0.612678	0.150482	4.07144	4.67226e-05	0.000930979	AAEL004818				GO:0005634	nucleus
LOC23687491	987.064	-0.433319	0.106477	-4.0696	4.70933e-05	0.000936756	AAEL017071	Carboxylic ester hydrolase [Source:UniProtKB/TrEMBL;Acc:A0A1S4G5Q9]			GO:0016787,GO:0052689	hydrolase activity,carboxylic ester hydrolase activity
LOC5567374	19.5451	-2.58345	0.634855	-4.06935	4.71444e-05	0.000936756	AAEL006042	arginine or creatine kinase [Source:VB Community Annotation]			GO:0000166,GO:0003824,GO:0004054,GO:0004111,GO:0005524,GO:0016301,GO:0016310,GO:0016740,GO:0016772,GO:0046314	nucleotide binding,catalytic activity,arginine kinase activity,creatine kinase activity,ATP binding,kinase activity,phosphorylation,transferase activity,transferase activity, transferring phosphorus-containing groups,phosphocreatine biosynthetic process
LOC110676870	12.2834	-2.98323	0.733413	-4.06759	4.7501e-05	0.000942523	AAEL025462
LOC110678573	113.645	1.0906	0.26835	4.06411	4.82156e-05	0.00095503	AAEL025686
LOC5569138	22.4428	-2.47023	0.607852	-4.06387	4.82657e-05	0.00095503	AAEL007393				GO:0007186,GO:0016020,GO:0016021,GO:0019236	G protein-coupled receptor signaling pathway,membrane,integral component of membrane,response to pheromone
LOC5576289	158.116	-1.02944	0.253681	-4.05803	4.94892e-05	0.000976814	AAEL012443	sugar transporter [Source:VB Community Annotation]			GO:0016020,GO:0016021,GO:0022857,GO:0055085	membrane,integral component of membrane,transmembrane transporter activity,transmembrane transport
LOC5572254	5060.95	0.685267	0.16887	4.05794	4.95066e-05	0.000976814	AAEL009691	carboxylase:pyruvate/acetyl-coa/propionyl-coa [Source:VB Community Annotation]			GO:0000166,GO:0003824,GO:0004736,GO:0005524,GO:0006090,GO:0006094,GO:0009374,GO:0016874,GO:0046872	nucleotide binding,catalytic activity,pyruvate carboxylase activity,ATP binding,pyruvate metabolic process,gluconeogenesis,biotin binding,ligase activity,metal ion binding
LOC5575383	1442.24	0.534036	0.131618	4.05747	4.96071e-05	0.000976814	AAEL011787
LOC5568364	25980	0.506212	0.124766	4.05731	4.96417e-05	0.000976814	AAEL001082
LOC110681577	12.0482	-3.14989	0.776843	-4.05473	5.01925e-05	0.000986286	AAEL023041
LOC5573535	531.121	0.58958	0.145422	4.05429	5.02877e-05	0.000986792	AAEL010592	esterase, putative [Source:VB Community Annotation]
LOC5571085	29.2314	-2.37045	0.584761	-4.0537	5.04133e-05	0.000987892	AAEL008820
LOC5564756	2702.19	-0.557634	0.137613	-4.05219	5.07411e-05	0.000992128	AAEL014605	cytochrome P450 [Source:VB Community Annotation]	CYP9J9		GO:0004497,GO:0005506,GO:0016020,GO:0016021,GO:0016491,GO:0016705,GO:0020037,GO:0046872,GO:0055114	monooxygenase activity,iron ion binding,membrane,integral component of membrane,oxidoreductase activity,oxidoreductase activity, acting on paired donors, with incorporation or reduction of molecular oxygen,heme binding,metal ion binding,oxidation-reduction process
LOC5579496	33.8076	-4.54474	1.12159	-4.05206	5.07691e-05	0.000992128	AAEL015254				GO:0005576,GO:0006030,GO:0008061	extracellular region,chitin metabolic process,chitin binding
LOC5570084	65.7883	-3.15958	0.780045	-4.05052	5.11047e-05	0.000996641	AAEL001346				GO:0016020,GO:0016021	membrane,integral component of membrane
LOC5571428	1171.61	-0.420913	0.10392	-4.05035	5.11404e-05	0.000996641	AAEL009061	rrm/rnp domain [Source:VB Community Annotation]			GO:0003676,GO:0003723,GO:0006397,GO:0046872	nucleic acid binding,RNA binding,mRNA processing,metal ion binding
LOC5576360	2680.9	0.64641	0.159625	4.04954	5.13181e-05	0.000998734	AAEL002860	Mitochondrial pyruvate carrier [Source:UniProtKB/TrEMBL;Acc:Q17GV8]			GO:0005739,GO:0005743,GO:0006850,GO:0016020,GO:0016021	mitochondrion,mitochondrial inner membrane,mitochondrial pyruvate transmembrane transport,membrane,integral component of membrane
LOC5575913	915.74	-0.979483	0.241907	-4.04901	5.14358e-05	0.000999246	AAEL012157				GO:0016020,GO:0016021	membrane,integral component of membrane
LOC5566493	3939.44	-0.450872	0.11136	-4.04878	5.14851e-05	0.000999246	AAEL005432				GO:0007160,GO:0016020,GO:0016021	cell-matrix adhesion,membrane,integral component of membrane
LOC5568577	206.125	-0.654477	0.161762	-4.04593	5.21161e-05	0.00101011	AAEL022849
LOC5573501	1407.12	-0.799654	0.197773	-4.04329	5.27055e-05	0.00102015	AAEL022033
LOC110679021	5.2126	5.89514	1.45873	4.04129	5.31583e-05	0.00102751	AAEL020738
LOC5566298	8121.24	0.445652	0.110287	4.04082	5.3264e-05	0.00102815	AAEL000746	NADP-specific isocitrate dehydrogenase [Source:VB Community Annotation]			GO:0000287,GO:0004450,GO:0006097,GO:0006099,GO:0006102,GO:0016491,GO:0016616,GO:0046872,GO:0051287,GO:0055114	magnesium ion binding,isocitrate dehydrogenase (NADP+) activity,glyoxylate cycle,tricarboxylic acid cycle,isocitrate metabolic process,oxidoreductase activity,oxidoreductase activity, acting on the CH-OH group of donors, NAD or NADP as acceptor,metal ion binding,NAD binding,oxidation-reduction process
LOC5564698	92.3495	-2.94707	0.729659	-4.03896	5.36878e-05	0.00103493	AAEL014571	oviductin [Source:VB Community Annotation]			GO:0004252,GO:0006508	serine-type endopeptidase activity,proteolysis
LOC5567076	937.041	0.616613	0.152835	4.0345	5.47198e-05	0.00105204	AAEL005819	l-allo-threonine aldolase [Source:VB Community Annotation]			GO:0003824,GO:0006520,GO:0016829	catalytic activity,cellular amino acid metabolic process,lyase activity
LOC5573113	24.8729	-2.29457	0.56874	-4.03448	5.47238e-05	0.00105204	AAEL002005	cytochrome P450 [Source:VB Community Annotation]	CYP12F6		GO:0004497,GO:0005506,GO:0016705,GO:0020037,GO:0055114	monooxygenase activity,iron ion binding,oxidoreductase activity, acting on paired donors, with incorporation or reduction of molecular oxygen,heme binding,oxidation-reduction process
LOC5573303	150.024	2.34169	0.581333	4.02814	5.62209e-05	0.0010787	AAEL010393	ferritin subunit, putative [Source:VB Community Annotation]			GO:0004322,GO:0005623,GO:0006826,GO:0006879,GO:0008199,GO:0016491,GO:0046872,GO:0055114	ferroxidase activity,obsolete cell,iron ion transport,cellular iron ion homeostasis,ferric iron binding,oxidoreductase activity,metal ion binding,oxidation-reduction process
LOC5564156	205.785	-0.886079	0.219982	-4.02796	5.62621e-05	0.0010787	AAEL004127	acyl-coa dehydrogenase [Source:VB Community Annotation]			GO:0003995,GO:0016491,GO:0016627,GO:0050660,GO:0055114	acyl-CoA dehydrogenase activity,oxidoreductase activity,oxidoreductase activity, acting on the CH-CH group of donors,flavin adenine dinucleotide binding,oxidation-reduction process
LOC5574161	30095.2	0.558963	0.138788	4.02746	5.63833e-05	0.00107956	AAEL010975	paramyosin, long form [Source:VB Community Annotation]			GO:0003774,GO:0016459	motor activity,myosin complex
LOC5577532	184.59	0.979495	0.243334	4.0253	5.69019e-05	0.00108803	AAEL013245	Clip-Domain Serine Protease family B. [Source:VB Community Annotation]	CLIPB28		GO:0004252,GO:0005576,GO:0006508,GO:0008233,GO:0008236,GO:0016787	serine-type endopeptidase activity,extracellular region,proteolysis,peptidase activity,serine-type peptidase activity,hydrolase activity
LOC5564177	786.436	-0.439035	0.109286	-4.0173	5.88692e-05	0.00112413	AAEL003534				GO:0005096,GO:0043547	GTPase activator activity,positive regulation of GTPase activity
LOC5565989	608.018	0.644001	0.160356	4.01608	5.91738e-05	0.00112787	AAEL026142				GO:0005737,GO:0006693,GO:0016491,GO:0032440,GO:0036132,GO:0047522,GO:0055114	cytoplasm,prostaglandin metabolic process,oxidoreductase activity,2-alkenal reductase [NAD(P)+] activity,13-prostaglandin reductase activity,15-oxoprostaglandin 13-oxidase activity,oxidation-reduction process
LOC23687938	269.726	-0.629764	0.156823	-4.01577	5.92521e-05	0.00112787	AAEL013633	ubiquitin-conjugating enzyme h [Source:VB Community Annotation]			GO:0000166,GO:0005524,GO:0016740	nucleotide binding,ATP binding,transferase activity
LOC5565421	342.038	0.578943	0.144175	4.01557	5.93029e-05	0.00112787	AAEL000674	RNA m5u methyltransferase [Source:VB Community Annotation]			GO:0001510,GO:0003676,GO:0006396,GO:0008168,GO:0008173,GO:0016740,GO:0032259	RNA methylation,nucleic acid binding,RNA processing,methyltransferase activity,RNA methyltransferase activity,transferase activity,methylation
LOC110678596	81.3323	-1.25084	0.311845	-4.01111	6.0434e-05	0.00114784	AAEL024558
LOC5571801	258.347	-0.859082	0.214238	-4.00993	6.07363e-05	0.00115204	AAEL009328	hydroxyacyl dehydrogenase [Source:VB Community Annotation]			GO:0016491,GO:0055114	oxidoreductase activity,oxidation-reduction process
LOC5572916	295.72	0.793661	0.198245	4.00343	6.2431e-05	0.00118261	AAEL010125	leucine-rich immune protein (Coil-less) [Source:VB Community Annotation]	LRIM17		GO:0005515	protein binding
LOC5578900	11903	0.617016	0.154177	4.002	6.28084e-05	0.00118684	AAEL013904	3-hydroxyisobutyrate dehydrogenase [Source:UniProtKB/TrEMBL;Acc:Q16HU0]			GO:0006574,GO:0008442,GO:0009083,GO:0016491,GO:0050661,GO:0051287,GO:0055114	valine catabolic process,3-hydroxyisobutyrate dehydrogenase activity,branched-chain amino acid catabolic process,oxidoreductase activity,NADP binding,NAD binding,oxidation-reduction process
LOC5572374	1858.15	-0.564426	0.141038	-4.00195	6.28216e-05	0.00118684	AAEL009764	xaa-pro aminopeptidase [Source:VB Community Annotation]			GO:0006508,GO:0016787,GO:0046872,GO:0070006	proteolysis,hydrolase activity,metal ion binding,metalloaminopeptidase activity
LOC5564989	861.751	0.760869	0.190263	3.99905	6.35975e-05	0.00119991	AAEL004521				GO:0005886,GO:0016020,GO:0030431,GO:0031225,GO:0032222,GO:0048511,GO:1903818	plasma membrane,membrane,sleep,anchored component of membrane,regulation of synaptic transmission, cholinergic,rhythmic process,positive regulation of voltage-gated potassium channel activity
LOC110675261	5.04006	5.8465	1.46361	3.99459	6.48073e-05	0.00121882	AAEL022684
LOC5575117	474.7	0.696991	0.174486	3.99453	6.48233e-05	0.00121882	AAEL000342	peroxidasin [Source:VB Community Annotation]			GO:0004601,GO:0005515,GO:0005576,GO:0006979,GO:0016491,GO:0020037,GO:0042744,GO:0055114,GO:0098869	peroxidase activity,protein binding,extracellular region,response to oxidative stress,oxidoreductase activity,heme binding,hydrogen peroxide catabolic process,oxidation-reduction process,cellular oxidant detoxification
LOC5574133	117.329	0.828884	0.207519	3.99425	6.48982e-05	0.00121882	AAEL010951	glutamate decarboxylase [Source:VB Community Annotation]			GO:0003824,GO:0016829,GO:0016831,GO:0019752,GO:0030170	catalytic activity,lyase activity,carboxy-lyase activity,carboxylic acid metabolic process,pyridoxal phosphate binding
LOC5572949	276.784	-0.692233	0.173314	-3.99409	6.49431e-05	0.00121882	AAEL010171	peptidoglycan recognition protein (Long) [Source:VB Community Annotation]	PGRPLB		GO:0002376,GO:0008270,GO:0008745,GO:0009253,GO:0042834,GO:0045087	immune system process,zinc ion binding,N-acetylmuramoyl-L-alanine amidase activity,peptidoglycan catabolic process,peptidoglycan binding,innate immune response
LOC5566116	2250.89	-0.428637	0.107419	-3.99033	6.59821e-05	0.00123669	AAEL005174
LOC110679479	30.2717	-4.03851	1.01298	-3.98675	6.69851e-05	0.00125383	AAEL022746
LOC110674852	17.3339	-2.40569	0.603719	-3.98478	6.75437e-05	0.00126124	AAEL021467				GO:0005515	protein binding
LOC5577760	198.951	-5.09173	1.27781	-3.98472	6.75585e-05	0.00126124	AAEL003297	alkaline phosphatase [Source:VB Community Annotation]			GO:0003824,GO:0004035,GO:0016311,GO:0016787,GO:0016791,GO:0031225	catalytic activity,alkaline phosphatase activity,dephosphorylation,hydrolase activity,phosphatase activity,anchored component of membrane
LOC5569388	332.071	-1.84135	0.462681	-3.97975	6.89885e-05	0.00128625	AAEL007579				GO:0016020,GO:0016021	membrane,integral component of membrane
LOC5574626	1014.13	-0.584505	0.147014	-3.97583	7.01331e-05	0.00130587	AAEL011264	phosphatidylethanolamine-binding protein [Source:VB Community Annotation]
LOC110675739	9.24903	4.20652	1.05812	3.97548	7.02367e-05	0.00130609	AAEL027775
LOC5575705	262.446	-3.99155	1.00459	-3.97331	7.08798e-05	0.00131633	AAEL012013				GO:0005576,GO:0008061	extracellular region,chitin binding
LOC5571321	53.0025	1.44522	0.363827	3.97227	7.11904e-05	0.00132037	AAEL008948				GO:0016020,GO:0016021	membrane,integral component of membrane
LOC5566650	228.824	-0.743954	0.187312	-3.97173	7.13524e-05	0.00132165	AAEL015644				GO:0000166,GO:0005524,GO:0008559,GO:0016020,GO:0016021,GO:0016887,GO:0042626,GO:0042908,GO:0055085	nucleotide binding,ATP binding,ATPase-coupled xenobiotic transmembrane transporter activity,membrane,integral component of membrane,ATPase activity,ATPase-coupled transmembrane transporter activity,xenobiotic transport,transmembrane transport
LOC110676129	30.3746	1.63987	0.413142	3.96928	7.20906e-05	0.00133358	AAEL024753
LOC110674190	48.0911	-1.26101	0.317861	-3.96718	7.27285e-05	0.00134363	AAEL005073
LOC23687495	6872.61	0.496707	0.125254	3.9656	7.3211e-05	0.00134875	AAEL017075				GO:0005730,GO:0046872	nucleolus,metal ion binding
LOC5568215	176.075	-0.70549	0.177927	-3.96505	7.33806e-05	0.00134875	AAEL006655	chromatin regulatory protein sir2 [Source:VB Community Annotation]			GO:0016740,GO:0070403	transferase activity,NAD+ binding
LOC5574456	903.826	0.424949	0.107174	3.96505	7.33809e-05	0.00134875	AAEL011177				GO:0005634,GO:0008270,GO:0046872	nucleus,zinc ion binding,metal ion binding
LOC5570421	240.689	0.625923	0.157861	3.96504	7.3385e-05	0.00134875	AAEL008320				GO:0005524,GO:0016887	ATP binding,ATPase activity
LOC5572422	1052.25	-1.49934	0.378339	-3.96296	7.40267e-05	0.00135878	AAEL001809
LOC5575933	1022.54	-0.696177	0.175774	-3.96063	7.47526e-05	0.00136885	AAEL012162	aldehyde dehydrogenase [Source:VB Community Annotation]			GO:0006081,GO:0016020,GO:0016021,GO:0016491,GO:0016620,GO:0055114	cellular aldehyde metabolic process,membrane,integral component of membrane,oxidoreductase activity,oxidoreductase activity, acting on the aldehyde or oxo group of donors, NAD or NADP as acceptor,oxidation-reduction process
LOC5575306	1557.77	-0.585316	0.147786	-3.96058	7.47681e-05	0.00136885	AAEL002631				GO:0005576,GO:0006030,GO:0008061	extracellular region,chitin metabolic process,chitin binding
LOC110678280	599.864	-0.458383	0.115762	-3.95972	7.50385e-05	0.00137204	AAEL027737				GO:0003676	nucleic acid binding
LOC5572333	451.276	1.00611	0.254122	3.95917	7.52092e-05	0.00137339	AAEL009722	clip-domain serine protease, putative [Source:VB Community Annotation]			GO:0004252,GO:0006508	serine-type endopeptidase activity,proteolysis
LOC5577296	169.396	-1.5751	0.398097	-3.95658	7.60302e-05	0.0013857	AAEL013148
LOC110676244	435.543	-0.501693	0.126806	-3.95637	7.60964e-05	0.0013857	AAEL027354				GO:0005975,GO:0016773	carbohydrate metabolic process,phosphotransferase activity, alcohol group as acceptor
LOC5564745	5227.44	1.18245	0.298903	3.95595	7.62311e-05	0.0013857	AAEL014600	4-hydroxyphenylpyruvate dioxygenase [Source:VB Community Annotation]			GO:0003868,GO:0009072,GO:0016701,GO:0046872,GO:0055114	4-hydroxyphenylpyruvate dioxygenase activity,aromatic amino acid family metabolic process,oxidoreductase activity, acting on single donors with incorporation of molecular oxygen,metal ion binding,oxidation-reduction process
LOC5570936	86.0485	-0.992259	0.250835	-3.95582	7.62735e-05	0.0013857	AAEL008673	ras-related protein Rab-9, putative [Source:VB Community Annotation]			GO:0003924,GO:0005525	GTPase activity,GTP binding
LOC5570772	927.657	0.453953	0.114841	3.95288	7.72156e-05	0.00140102	AAEL019441				GO:0003779,GO:0035025	actin binding,positive regulation of Rho protein signal transduction
LOC5577323	9.38365	-5.62857	1.42411	-3.95233	7.73928e-05	0.00140245	AAEL000432	nucleosome assembly protein [Source:VB Community Annotation]			GO:0005634,GO:0006334	nucleus,nucleosome assembly
LOC110676934	5.0598	-5.72544	1.44955	-3.94979	7.82191e-05	0.00141382	AAEL021478
LOC110677998	5.0598	-5.72544	1.44955	-3.94979	7.82191e-05	0.00141382	AAEL027587
LOC5576202	308.893	-0.628447	0.159145	-3.94891	7.85088e-05	0.00141725	AAEL012393				GO:0016020,GO:0016021	membrane,integral component of membrane
LOC5576327	152.286	-0.78854	0.199837	-3.94592	7.94935e-05	0.0014332	AAEL000406
LOC5576555	17114.4	0.810735	0.205738	3.94061	8.12735e-05	0.00146344	AAEL012616	NADP transhydrogenase [Source:VB Community Annotation]			GO:0008746,GO:0016020,GO:0016021,GO:0016491,GO:0055114,GO:1902600	NAD(P)+ transhydrogenase activity,membrane,integral component of membrane,oxidoreductase activity,oxidation-reduction process,proton transmembrane transport
LOC5571188	1532.3	-0.912539	0.231824	-3.93635	8.27297e-05	0.00148777	AAEL008879	Kynurenine 3-monooxygenase (EC 1.14.13.9)(Kynurenine 3-hydroxylase) [Source:VB Community Annotation]			GO:0004497,GO:0004502,GO:0005739,GO:0005741,GO:0006569,GO:0009435,GO:0016020,GO:0016021,GO:0016491,GO:0019363,GO:0019674,GO:0019805,GO:0031966,GO:0034354,GO:0043420,GO:0050660,GO:0055114,GO:0071949	monooxygenase activity,kynurenine 3-monooxygenase activity,mitochondrion,mitochondrial outer membrane,tryptophan catabolic process,NAD biosynthetic process,membrane,integral component of membrane,oxidoreductase activity,pyridine nucleotide biosynthetic process,NAD metabolic process,quinolinate biosynthetic process,mitochondrial membrane,'de novo' NAD biosynthetic process from tryptophan,anthranil…
LOC5573155	8899.32	1.00981	0.256783	3.93255	8.40481e-05	0.00150957	AAEL001993	protein serine/threonine kinase, putative [Source:VB Community Annotation]
LOC110675456	159.256	1.13769	0.289432	3.93075	8.46806e-05	0.00151901	AAEL021669
LOC5569000	503.415	-0.918919	0.234021	-3.92666	8.61341e-05	0.00154314	AAEL007283	acetyl-coa synthetase [Source:VB Community Annotation]			GO:0003824	catalytic activity
LOC5577761	4775.05	-0.776183	0.197688	-3.92631	8.626e-05	0.00154345	AAEL003298	alkaline phosphatase [Source:VB Community Annotation]			GO:0003824,GO:0004035,GO:0016311,GO:0016787,GO:0016791,GO:0031225	catalytic activity,alkaline phosphatase activity,dephosphorylation,hydrolase activity,phosphatase activity,anchored component of membrane
LOC5566670	198.273	-0.903919	0.230332	-3.92442	8.69392e-05	0.00155364	AAEL005548	tetraspanin, putative [Source:VB Community Annotation]			GO:0016020,GO:0016021	membrane,integral component of membrane
LOC5577563	321.602	-0.689048	0.175647	-3.9229	8.7488e-05	0.00156149	AAEL019605				GO:0000139,GO:0005794,GO:0006486,GO:0016020,GO:0016021,GO:0016740,GO:0016757,GO:0030246	Golgi membrane,Golgi apparatus,protein glycosylation,membrane,integral component of membrane,transferase activity,transferase activity, transferring glycosyl groups,carbohydrate binding
LOC5570902	12.4387	-2.63307	0.671546	-3.92091	8.82169e-05	0.00157252	AAEL001491				GO:0005737,GO:0005815,GO:0005856,GO:0005868,GO:0005929,GO:0035721,GO:0035735	cytoplasm,microtubule organizing center,cytoskeleton,cytoplasmic dynein complex,cilium,intraciliary retrograde transport,intraciliary transport involved in cilium assembly
LOC110675324	30.04	1.63814	0.418056	3.91848	8.91096e-05	0.00158571	AAEL022120
LOC5579856	10176.7	0.594046	0.151608	3.91829	8.91803e-05	0.00158571	AAEL005849	synaptic vesicle protein [Source:VB Community Annotation]			GO:0016020,GO:0016021,GO:0022857,GO:0055085	membrane,integral component of membrane,transmembrane transporter activity,transmembrane transport
LOC5563949	12.4615	-3.76457	0.960943	-3.91758	8.94417e-05	0.00158837	AAEL004020
LOC5564668	183.577	0.943417	0.241064	3.91355	9.09488e-05	0.00161312	AAEL014551	triacylglycerol lipase, pancreatic [Source:VB Community Annotation]			GO:0004806,GO:0005576,GO:0006629,GO:0046872,GO:0052689	triglyceride lipase activity,extracellular region,lipid metabolic process,metal ion binding,carboxylic ester hydrolase activity
LOC5569924	478.326	-0.976519	0.249664	-3.91133	9.17891e-05	0.0016242	AAEL008024				GO:0016020,GO:0016021	membrane,integral component of membrane
LOC5567869	101.924	-1.02353	0.261685	-3.9113	9.18019e-05	0.0016242	AAEL006314	upstream transcription factor [Source:VB Community Annotation]			GO:0006355,GO:0046983	regulation of transcription, DNA-templated,protein dimerization activity
LOC5571572	373.751	-0.628389	0.160854	-3.90657	9.36169e-05	0.00165425	AAEL022328				GO:0005515	protein binding
LOC5570416	10050.6	0.496926	0.127231	3.90569	9.39552e-05	0.00165816	AAEL008303	calponin/transgelin [Source:VB Community Annotation]			GO:0003779,GO:0005515,GO:0005516,GO:0031032	actin binding,protein binding,calmodulin binding,actomyosin structure organization
LOC23687423	138.816	1.58414	0.405883	3.90294	9.50314e-05	0.00167508	AAEL017003	Clip-domain serine protease, family B [Source:VB Community Annotation]			GO:0004252,GO:0005576,GO:0006508,GO:0008233,GO:0008236,GO:0016787	serine-type endopeptidase activity,extracellular region,proteolysis,peptidase activity,serine-type peptidase activity,hydrolase activity
LOC110681180	59.9061	-1.84864	0.473939	-3.90059	9.59579e-05	0.00168931	AAEL022078				GO:0000049,GO:0003824	tRNA binding,catalytic activity
LOC5573283	72.6004	1.57947	0.405509	3.89504	9.81833e-05	0.00172624	AAEL010369	phospholipase b, plb1 [Source:VB Community Annotation]			GO:0004620	phospholipase activity
LOC110681185	60.2586	-1.03797	0.266505	-3.89475	9.82985e-05	0.00172624	AAEL023412				GO:0005669,GO:0046982	transcription factor TFIID complex,protein heterodimerization activity
LOC5578684	1683.55	-0.719907	0.184876	-3.89399	9.86082e-05	0.00172954	AAEL003645	stearoyl-coa desaturase [Source:VB Community Annotation]			GO:0006629,GO:0006633,GO:0016020,GO:0016021,GO:0016491,GO:0016717,GO:0055114	lipid metabolic process,fatty acid biosynthetic process,membrane,integral component of membrane,oxidoreductase activity,oxidoreductase activity, acting on paired donors, with oxidation of a pair of donors resulting in the reduction of molecular oxygen to two molecules of water,oxidation-reduction process
LOC5568127	711.377	-0.44891	0.115319	-3.89278	9.91025e-05	0.00173474	AAEL006550	rnf5 [Source:VB Community Annotation]			GO:0016020,GO:0016021,GO:0046872	membrane,integral component of membrane,metal ion binding
LOC5564423	2382.68	-5.50174	1.41336	-3.89267	9.91489e-05	0.00173474	AAEL014433				GO:0016020,GO:0016021	membrane,integral component of membrane
LOC5573692	404.104	0.535165	0.137654	3.88777	0.00010117	0.00176793	AAEL010653	alpha-l-fucosidase [Source:VB Community Annotation]			GO:0004560,GO:0005975,GO:0006004,GO:0008152,GO:0016787,GO:0016798	alpha-L-fucosidase activity,carbohydrate metabolic process,fucose metabolic process,metabolic process,hydrolase activity,hydrolase activity, acting on glycosyl bonds
LOC5570899	212.437	-2.01744	0.519028	-3.88697	0.000101504	0.00177158	AAEL001494
LOC5575519	946.836	-0.79273	0.20401	-3.88574	0.000102018	0.00177836	AAEL024295				GO:0003841,GO:0006629,GO:0008654,GO:0016020,GO:0016740,GO:0016746	1-acylglycerol-3-phosphate O-acyltransferase activity,lipid metabolic process,phospholipid biosynthetic process,membrane,transferase activity,transferase activity, transferring acyl groups
LOC5567515	1518.06	-0.897158	0.230916	-3.88522	0.000102238	0.00178001	AAEL006139	Sodium/solute symporter [Source:UniProtKB/TrEMBL;Acc:A0A1S4FCK0]			GO:0016020,GO:0016021,GO:0022857,GO:0055085	membrane,integral component of membrane,transmembrane transporter activity,transmembrane transport
LOC5579241	882.818	0.462587	0.119086	3.8845	0.000102542	0.00178313	AAEL020646				GO:0005777,GO:0005778,GO:0016020,GO:0016021,GO:0031410	peroxisome,peroxisomal membrane,membrane,integral component of membrane,cytoplasmic vesicle
LOC110680555	4.68594	5.74173	1.47832	3.88394	0.000102775	0.001785	AAEL020871
LOC5568586	1349.01	0.392711	0.101145	3.88264	0.000103328	0.0017924	AAEL001101	ATP-dependent transporter [Source:VB Community Annotation]			GO:0000166,GO:0005524,GO:0016887	nucleotide binding,ATP binding,ATPase activity
LOC5565904	2410.01	-0.6054	0.155972	-3.88146	0.000103832	0.00179895	AAEL018117
LOC5571283	245.983	-0.809524	0.208677	-3.87931	0.000104754	0.00181272	AAEL001575	Monocarboxylate transporter [Source:UniProtKB/TrEMBL;Acc:A0A1S4EZ55]			GO:0016020,GO:0016021,GO:0022857,GO:0055085	membrane,integral component of membrane,transmembrane transporter activity,transmembrane transport
LOC5563950	22.0094	-5.3577	1.38148	-3.87824	0.000105215	0.00181847	AAEL004018
LOC110675454	4103.78	1.05989	0.273319	3.87785	0.000105382	0.00181915	AAEL023083
LOC110676558	33.0173	-2.95269	0.76184	-3.87573	0.000106304	0.00183284	AAEL023929
LOC5575162	4087.94	-0.372448	0.0961364	-3.87416	0.000106993	0.00184248	AAEL000328				GO:0016491,GO:0055114	oxidoreductase activity,oxidation-reduction process
LOC5577433	701.367	-0.532595	0.137644	-3.86935	0.000109126	0.00187695	AAEL019845				GO:0016301,GO:0016310,GO:0016740,GO:0032958	kinase activity,phosphorylation,transferase activity,inositol phosphate biosynthetic process
LOC5573623	1881.01	0.58889	0.152215	3.8688	0.000109373	0.00187704	AAEL010602	starch branching enzyme ii [Source:VB Community Annotation]			GO:0003824,GO:0003844,GO:0004553,GO:0005975,GO:0005978,GO:0008152,GO:0016740,GO:0016798,GO:0043169,GO:0102752	catalytic activity,1,4-alpha-glucan branching enzyme activity,hydrolase activity, hydrolyzing O-glycosyl compounds,carbohydrate metabolic process,glycogen biosynthetic process,metabolic process,transferase activity,hydrolase activity, acting on glycosyl bonds,cation binding,1,4-alpha-glucan branching enzyme activity (using a glucosylated glycogenin as primer for glycogen synthesis)
LOC5574015	32142.1	0.469007	0.12123	3.86872	0.000109406	0.00187704	AAEL010850	troponin i [Source:VB Community Annotation]			GO:0005861	troponin complex
LOC5572642	53.833	-1.14334	0.295554	-3.86845	0.000109528	0.00187704	AAEL001877	Fucosyltransferase 11 (fut11) [Source:UniProtKB/TrEMBL;Acc:A0A1S4F010]			GO:0005794,GO:0006486,GO:0008417,GO:0016020,GO:0016021,GO:0016740,GO:0016757,GO:0032580,GO:0036065	Golgi apparatus,protein glycosylation,fucosyltransferase activity,membrane,integral component of membrane,transferase activity,transferase activity, transferring glycosyl groups,Golgi cisterna membrane,fucosylation
LOC5578108	11.3079	3.18925	0.82544	3.86369	0.000111685	0.0019117	AAEL003404
LOC5564541	1525.49	-0.419961	0.108822	-3.85916	0.000113776	0.00194515	AAEL004307	n-myc downstream regulated [Source:VB Community Annotation]
LOC110677167	4.69269	5.74349	1.48875	3.85794	0.000114349	0.00195258	AAEL021220
LOC5573071	827.266	-0.683366	0.177556	-3.84874	0.000118728	0.00202493	AAEL010265
LOC5574420	3304.35	0.6816	0.177284	3.84468	0.000120708	0.00205536	AAEL019780				GO:0005739,GO:0008260,GO:0008410,GO:0016740,GO:0046952	mitochondrion,3-oxoacid CoA-transferase activity,CoA-transferase activity,transferase activity,ketone body catabolic process
LOC110677068	910.643	1.36799	0.355832	3.84449	0.000120801	0.00205536	AAEL021730
LOC5564011	2687.01	-0.476193	0.123928	-3.84249	0.000121794	0.00206976	AAEL014272	molybdopterin cofactor sulfurase (mosc) [Source:VB Community Annotation]			GO:0003824,GO:0016020,GO:0016021,GO:0030151,GO:0030170	catalytic activity,membrane,integral component of membrane,molybdenum ion binding,pyridoxal phosphate binding
LOC5575348	32.4497	-2.64127	0.688047	-3.8388	0.000123637	0.00209859	AAEL002598	odorant binding protein OBP15 [Source:VB Community Annotation]	OBP15		GO:0005549	odorant binding
LOC5565360	349.453	-0.882485	0.229979	-3.83725	0.00012442	0.00210935	AAEL004784	3-2trans-enoyl-CoA isomerase, putative [Source:VB Community Annotation]			GO:0003824	catalytic activity
LOC110675933	39.898	2.26166	0.58971	3.83521	0.000125455	0.00212214	AAEL023669
LOC5576745	5008.72	0.695104	0.181244	3.83518	0.000125473	0.00212214	AAEL012731	Adenylate kinase 2, mitochondrial (AK 2)(EC 2.7.4.3)(ATP-AMP transphosphorylase 2) [Source:VB Community Annotation]	Adk2		GO:0000166,GO:0004017,GO:0005524,GO:0005737,GO:0005739,GO:0005758,GO:0005829,GO:0006139,GO:0006172,GO:0016301,GO:0016310,GO:0016740,GO:0016776,GO:0019205,GO:0046033,GO:0046034,GO:0046940	nucleotide binding,adenylate kinase activity,ATP binding,cytoplasm,mitochondrion,mitochondrial intermembrane space,cytosol,nucleobase-containing compound metabolic process,ADP biosynthetic process,kinase activity,phosphorylation,transferase activity,phosphotransferase activity, phosphate group as acceptor,nucleobase-containing compound kinase activity,AMP metabolic process,ATP metabolic process,n…
LOC5566701	4755.04	0.639799	0.166846	3.83468	0.000125729	0.00212293	AAEL005593
LOC5573081	143.012	-4.44891	1.16023	-3.8345	0.000125819	0.00212293	AAEL025309				GO:0004252,GO:0006508,GO:0008233,GO:0008236,GO:0016020,GO:0016021,GO:0016787	serine-type endopeptidase activity,proteolysis,peptidase activity,serine-type peptidase activity,membrane,integral component of membrane,hydrolase activity
LOC5580169	162.655	-1.51851	0.396042	-3.83421	0.000125968	0.00212293	AAEL002567				GO:0005737,GO:0005741,GO:0016020,GO:0035694	cytoplasm,mitochondrial outer membrane,membrane,mitochondrial protein catabolic process
LOC5573618	6937.17	-0.670834	0.174987	-3.83363	0.000126265	0.00212541	AAEL010609				GO:0006030,GO:0008061,GO:0016020,GO:0016021	chitin metabolic process,chitin binding,membrane,integral component of membrane
LOC5575006	42.3911	-2.15447	0.562623	-3.82933	0.000128494	0.00215797	AAEL026448				GO:0080019	fatty-acyl-CoA reductase (alcohol-forming) activity
LOC23687990	14579.8	-0.804073	0.209979	-3.82931	0.000128503	0.00215797	AAEL017570
LOC5570979	4289.4	-0.868187	0.22682	-3.82764	0.000129377	0.00216967	AAEL008702	prolylcarboxypeptidase, putative [Source:VB Community Annotation]			GO:0006508,GO:0008236,GO:0016787	proteolysis,serine-type peptidase activity,hydrolase activity
LOC5565389	36.4213	-1.42237	0.371649	-3.8272	0.000129608	0.00216967	AAEL004777	Glycoprotein Hormone Family [Source:VB Community Annotation]	GPRGRK		GO:0004930,GO:0005515,GO:0005886,GO:0007186,GO:0016020,GO:0016021,GO:0016500	G protein-coupled receptor activity,protein binding,plasma membrane,G protein-coupled receptor signaling pathway,membrane,integral component of membrane,protein-hormone receptor activity
LOC5571922	451.2	-0.674541	0.176253	-3.82711	0.000129658	0.00216967	AAEL009406	n(4)-(beta-n-acetylglucosaminyl)-l-asparaginase [Source:VB Community Annotation]			GO:0016787	hydrolase activity
LOC5566279	150.569	-0.756864	0.197808	-3.82626	0.000130107	0.00217462	AAEL000747
LOC5571107	809.191	-0.538988	0.140889	-3.82563	0.000130436	0.00217756	AAEL001526	zinc finger protein [Source:VB Community Annotation]			GO:0003676	nucleic acid binding
LOC110679058	4.5134	5.68754	1.48686	3.82519	0.000130673	0.00217896	AAEL021178
LOC5572897	2536.71	1.0331	0.270221	3.82318	0.000131743	0.00219423	AAEL010104
LOC5567544	395.229	0.650014	0.17004	3.82271	0.000131991	0.00219578	AAEL006136	serine protease, putative [Source:VB Community Annotation]			GO:0004252,GO:0006508	serine-type endopeptidase activity,proteolysis
LOC5571093	2893.92	-0.568745	0.148902	-3.81959	0.000133673	0.00222116	AAEL008801
LOC5565259	159.901	-3.56618	0.933858	-3.81876	0.000134126	0.00222608	AAEL004703
LOC5566525	1087.65	0.485827	0.127548	3.80897	0.000139545	0.00231333	AAEL005455	CTP synthase [Source:UniProtKB/TrEMBL;Acc:Q17A05]	CTPsyn		GO:0000166,GO:0003883,GO:0005524,GO:0006221,GO:0006241,GO:0006541,GO:0016874,GO:0044210	nucleotide binding,CTP synthase activity,ATP binding,pyrimidine nucleotide biosynthetic process,CTP biosynthetic process,glutamine metabolic process,ligase activity,'de novo' CTP biosynthetic process
LOC110679138	14.9233	2.39875	0.629855	3.80841	0.000139862	0.00231587	AAEL018047				GO:0046872	metal ion binding
LOC5579844	39.6118	1.99019	0.523063	3.80489	0.00014187	0.00234639	AAEL005854	amino acid transporter [Source:VB Community Annotation]			GO:0016020,GO:0016021	membrane,integral component of membrane
LOC5569487	633.801	0.482667	0.126896	3.80364	0.000142588	0.00235552	AAEL027189
LOC5566830	23.7868	-2.46178	0.64746	-3.80222	0.000143408	0.00236632	AAEL005668
LOC5567477	227.23	-0.589793	0.155248	-3.79904	0.000145258	0.00239407	AAEL000933				GO:0016020,GO:0016021	membrane,integral component of membrane
LOC110680413	172.621	-1.34494	0.354178	-3.79735	0.00014625	0.00240762	AAEL023099
LOC5564993	30.2413	1.62583	0.428466	3.79453	0.000147921	0.00243231	AAEL004522	gambicin anti-microbial peptide [Source:VB Community Annotation]	GAM1
LOC5570797	286.419	-0.653167	0.172172	-3.7937	0.000148421	0.00243268	AAEL008588	Innexin [Source:UniProtKB/TrEMBL;Acc:Q16YE3]	inx7		GO:0005886,GO:0005921,GO:0006811,GO:0016020,GO:0016021,GO:0030054	plasma membrane,gap junction,ion transport,membrane,integral component of membrane,cell junction
LOC5573200	2592.3	-0.576864	0.152059	-3.79368	0.00014843	0.00243268	AAEL001998				GO:0016020,GO:0016021	membrane,integral component of membrane
LOC5571086	6288.21	0.840295	0.221501	3.79364	0.000148457	0.00243268	AAEL026403
LOC5567219	1292.18	-0.491794	0.12975	-3.79034	0.000150444	0.00246239	AAEL000904	Carboxylic ester hydrolase [Source:UniProtKB/TrEMBL;Acc:A0A1S4EX74]			GO:0016787,GO:0052689	hydrolase activity,carboxylic ester hydrolase activity
LOC5563977	798.076	0.479053	0.126425	3.78924	0.00015111	0.00247045	AAEL004017	DNA polymerase v [Source:VB Community Annotation]			GO:0003677,GO:0005634,GO:0005730,GO:0006355,GO:0008134	DNA binding,nucleus,nucleolus,regulation of transcription, DNA-templated,transcription factor binding
LOC5570455	3328.22	0.60789	0.160687	3.78308	0.000154901	0.00252846	AAEL008341	Adenosylhomocysteinase [Source:UniProtKB/TrEMBL;Acc:Q1HQR0]			GO:0004013,GO:0006730,GO:0016787,GO:0019510,GO:0051287	adenosylhomocysteinase activity,one-carbon metabolic process,hydrolase activity,S-adenosylhomocysteine catabolic process,NAD binding
LOC5567474	115.22	-1.79996	0.475816	-3.7829	0.000155014	0.00252846	AAEL027732
LOC5570298	97.491	1.03564	0.273792	3.78256	0.000155223	0.00252896	AAEL022132				GO:0004806,GO:0005576,GO:0006629,GO:0052689	triglyceride lipase activity,extracellular region,lipid metabolic process,carboxylic ester hydrolase activity
LOC5568272	165.463	0.752513	0.199016	3.78116	0.000156099	0.0025375	AAEL006705				GO:0005515	protein binding
LOC5569249	2876.83	-0.394882	0.104434	-3.78115	0.000156105	0.0025375	AAEL020508
LOC5566047	473.918	0.728115	0.1927	3.7785	0.000157778	0.00256178	AAEL005147				GO:0003677,GO:0003700,GO:0005634,GO:0006355,GO:0042025,GO:0043565	DNA binding,DNA-binding transcription factor activity,nucleus,regulation of transcription, DNA-templated,host cell nucleus,sequence-specific DNA binding
LOC110675611	860.318	0.884643	0.234243	3.77661	0.000158977	0.00257829	AAEL026833
LOC5570648	939.655	0.495348	0.13125	3.77408	0.0001606	0.00260165	AAEL008468	cysteine synthase [Source:VB Community Annotation]			GO:0004122,GO:0005737,GO:0006535,GO:0008652,GO:0016829,GO:0019343,GO:0019344	cystathionine beta-synthase activity,cytoplasm,cysteine biosynthetic process from serine,cellular amino acid biosynthetic process,lyase activity,cysteine biosynthetic process via cystathionine,cysteine biosynthetic process
LOC5577300	26.0098	-4.13316	1.09524	-3.77376	0.000160805	0.00260201	AAEL013152				GO:0016020,GO:0016021	membrane,integral component of membrane
LOC5574978	2356.55	0.467269	0.123905	3.7712	0.000162463	0.00262584	AAEL002510	serine hydroxymethyltransferase [Source:VB Community Annotation]			GO:0003824,GO:0004372,GO:0006730,GO:0016740,GO:0019264,GO:0030170,GO:0035999	catalytic activity,glycine hydroxymethyltransferase activity,one-carbon metabolic process,transferase activity,glycine biosynthetic process from serine,pyridoxal phosphate binding,tetrahydrofolate interconversion
LOC5576864	520.035	0.516173	0.136983	3.76816	0.000164452	0.00265497	AAEL012845	Mitochondrial import inner membrane translocase subunit TIM44 [Source:UniProtKB/TrEMBL;Acc:Q16KX3]			GO:0005739,GO:0005743,GO:0015031,GO:0016020,GO:0030150,GO:0051087	mitochondrion,mitochondrial inner membrane,protein transport,membrane,protein import into mitochondrial matrix,chaperone binding
LOC5571137	712.991	0.650345	0.17262	3.7675	0.00016489	0.00265901	AAEL020307				GO:0000055,GO:0005634,GO:0005730,GO:0015031,GO:0030036,GO:0042254,GO:0042273	ribosomal large subunit export from nucleus,nucleus,nucleolus,protein transport,actin cytoskeleton organization,ribosome biogenesis,ribosomal large subunit biogenesis
LOC5564054	3937.51	1.00364	0.266645	3.76395	0.000167251	0.00269402	AAEL004048	UNC93A protein, putative [Source:VB Community Annotation]			GO:0016020,GO:0016021	membrane,integral component of membrane
LOC110679169	100.793	0.863937	0.229664	3.76174	0.000168733	0.00271482	AAEL027231
LOC5579366	120.462	0.774371	0.205925	3.76044	0.000169612	0.00272588	AAEL015527				GO:0004252,GO:0006508	serine-type endopeptidase activity,proteolysis
LOC5565780	115.41	1.02213	0.271849	3.75993	0.000169962	0.00272842	AAEL004970				GO:0000166,GO:0004371,GO:0005524,GO:0006071,GO:0016301,GO:0016310,GO:0016740,GO:0034012	nucleotide binding,glycerone kinase activity,ATP binding,glycerol metabolic process,kinase activity,phosphorylation,transferase activity,FAD-AMP lyase (cyclizing) activity
LOC110674096	51.7393	-2.62668	0.698749	-3.75911	0.000170519	0.00273427	AAEL022804
LOC23687863	91.3087	-1.22628	0.326258	-3.75863	0.000170843	0.00273638	AAEL017443				GO:0003824,GO:0016020,GO:0016021	catalytic activity,membrane,integral component of membrane
LOC5567808	568.276	-0.488326	0.130059	-3.75465	0.000173585	0.00277717	AAEL000985				GO:0007034,GO:0016020,GO:0016021,GO:0030001	vacuolar transport,membrane,integral component of membrane,metal ion transport
LOC5577949	15.4571	2.28938	0.609812	3.75425	0.000173865	0.00277851	AAEL013432	serine protease, putative [Source:VB Community Annotation]			GO:0004252,GO:0006508	serine-type endopeptidase activity,proteolysis
LOC5572450	903.604	0.697559	0.186055	3.7492	0.0001774	0.00283181	AAEL001835	sodium/solute symporter [Source:VB Community Annotation]			GO:0016020,GO:0016021,GO:0022857,GO:0055085	membrane,integral component of membrane,transmembrane transporter activity,transmembrane transport
LOC5575145	254.644	-0.824831	0.220019	-3.74892	0.0001776	0.00283184	AAEL012978				GO:0016020,GO:0016021	membrane,integral component of membrane
LOC110675876	4.84282	5.79	1.54557	3.74619	0.00017954	0.00285955	AAEL020740
LOC5572902	142.291	-0.743295	0.1985	-3.74455	0.000180715	0.00287506	AAEL019711				GO:0004435,GO:0005509,GO:0006629,GO:0007165,GO:0008081,GO:0016042,GO:0016787,GO:0035556	phosphatidylinositol phospholipase C activity,calcium ion binding,lipid metabolic process,signal transduction,phosphoric diester hydrolase activity,lipid catabolic process,hydrolase activity,intracellular signal transduction
LOC5570022	89.4778	-0.862561	0.230492	-3.74226	0.00018237	0.00289814	AAEL000206	ninjurin A, putative [Source:VB Community Annotation]			GO:0007155,GO:0016020,GO:0016021,GO:0042246	cell adhesion,membrane,integral component of membrane,tissue regeneration
LOC5574939	132.234	-0.705321	0.188667	-3.73845	0.000185159	0.00293917	AAEL011532
LOC5564321	762.605	-0.796291	0.21306	-3.7374	0.000185935	0.00294819	AAEL000575	apyrase, putative [Source:VB Community Annotation]			GO:0000166,GO:0009166,GO:0016787	nucleotide binding,nucleotide catabolic process,hydrolase activity
LOC5568275	291.84	1.03962	0.278337	3.7351	0.000187639	0.0029719	AAEL026387				GO:0016747	transferase activity, transferring acyl groups other than amino-acyl groups
LOC5567112	288.938	-0.715315	0.191578	-3.73381	0.000188602	0.00298381	AAEL005826	E3 ubiquitin-protein ligase [Source:UniProtKB/TrEMBL;Acc:A0A1S4FBP6]			GO:0005515,GO:0005634,GO:0005737,GO:0006511,GO:0007275,GO:0008270,GO:0016567,GO:0016740,GO:0042025,GO:0046872	protein binding,nucleus,cytoplasm,ubiquitin-dependent protein catabolic process,multicellular organism development,zinc ion binding,protein ubiquitination,transferase activity,host cell nucleus,metal ion binding
LOC23687432	20760.2	0.750889	0.201129	3.73337	0.000188935	0.00298487	AAEL017012
LOC23687751	148.507	0.989133	0.264958	3.73316	0.000189089	0.00298487	AAEL017331				GO:0006508,GO:0006751,GO:0036374	proteolysis,glutathione catabolic process,glutathione hydrolase activity
LOC5571232	160.384	0.931729	0.249614	3.73267	0.000189459	0.00298622	AAEL024784				GO:0004252,GO:0006508	serine-type endopeptidase activity,proteolysis
LOC5578096	1541.67	-0.909115	0.243568	-3.73249	0.000189594	0.00298622	AAEL003424	zinc carboxypeptidase [Source:VB Community Annotation]			GO:0004180,GO:0004181,GO:0006508,GO:0008233,GO:0008237,GO:0008270,GO:0016787,GO:0046872	carboxypeptidase activity,metallocarboxypeptidase activity,proteolysis,peptidase activity,metallopeptidase activity,zinc ion binding,hydrolase activity,metal ion binding
LOC5568602	985.038	0.430759	0.11547	3.73048	0.000191113	0.0030068	AAEL001103	prefoldin, subunit, putative [Source:VB Community Annotation]			GO:0006457,GO:0016272,GO:0051082	protein folding,prefoldin complex,unfolded protein binding
LOC5580184	768.65	-0.537807	0.144186	-3.72995	0.000191518	0.00300984	AAEL002550	polyA-binding protein interacting protein, putative [Source:VB Community Annotation]			GO:0000900,GO:0045947	translation repressor activity, mRNA regulatory element binding,negative regulation of translational initiation
LOC5571611	404.104	0.542412	0.145437	3.72954	0.000191828	0.00301138	AAEL009195				GO:0016020,GO:0016021,GO:0022857,GO:0055085	membrane,integral component of membrane,transmembrane transporter activity,transmembrane transport
LOC110678414	4.44691	-5.53818	1.48549	-3.72819	0.000192857	0.0030242	AAEL026759
LOC5578912	651.648	-0.497807	0.133578	-3.7267	0.000194002	0.0030388	AAEL013915	monocarboxylate transporter [Source:VB Community Annotation]			GO:0016020,GO:0016021,GO:0022857,GO:0055085	membrane,integral component of membrane,transmembrane transporter activity,transmembrane transport
LOC5574355	30.4647	-1.67249	0.448874	-3.72597	0.000194564	0.00304424	AAEL002353				GO:0005515	protein binding
LOC5574643	744.147	0.542717	0.145724	3.72427	0.000195878	0.00306095	AAEL011282	ribosomal RNA small subunit methyltransferase b (sun) [Source:VB Community Annotation]			GO:0001510,GO:0003723,GO:0005730,GO:0006364,GO:0006396,GO:0008168,GO:0008757,GO:0016740,GO:0032259,GO:0042254	RNA methylation,RNA binding,nucleolus,rRNA processing,RNA processing,methyltransferase activity,S-adenosylmethionine-dependent methyltransferase activity,transferase activity,methylation,ribosome biogenesis
LOC23687616	761.02	-0.983621	0.264128	-3.72404	0.000196063	0.00306095	AAEL020614				GO:0004222,GO:0006508,GO:0008237	metalloendopeptidase activity,proteolysis,metallopeptidase activity
LOC5566855	110.771	1.2066	0.324204	3.72173	0.00019786	0.00308225	AAEL000820	dimethylaniline monooxygenase [Source:VB Community Annotation]			GO:0004497,GO:0004499,GO:0016491,GO:0050660,GO:0050661,GO:0055114	monooxygenase activity,N,N-dimethylaniline monooxygenase activity,oxidoreductase activity,flavin adenine dinucleotide binding,NADP binding,oxidation-reduction process
LOC5571327	160.253	-0.945329	0.254003	-3.72173	0.000197861	0.00308225	AAEL008939				GO:0016747	transferase activity, transferring acyl groups other than amino-acyl groups
LOC5569811	868.124	1.45011	0.389794	3.7202	0.000199062	0.0030956	AAEL001295
LOC110676299	154.411	-0.740641	0.199092	-3.72009	0.000199154	0.0030956	AAEL024398				GO:0023041,GO:0030867	neuronal signal transduction,rough endoplasmic reticulum membrane
LOC5575579	157.226	-0.651319	0.175104	-3.71961	0.000199528	0.00309803	AAEL002671				GO:0005525	GTP binding
LOC110678740	7.67972	3.96214	1.06586	3.71733	0.000201336	0.00312268	AAEL021613
LOC110679173	4.40852	-5.52761	1.48713	-3.71696	0.000201637	0.00312394	AAEL021115
LOC5565905	123.102	-1.21893	0.328003	-3.71621	0.000202231	0.00312973	AAEL000683				GO:0016020,GO:0016021	membrane,integral component of membrane
LOC110677861	20002.8	-0.930515	0.250536	-3.71409	0.000203935	0.00315267	AAEL000585				GO:0005576,GO:0008061	extracellular region,chitin binding
LOC5570134	1016.37	0.422451	0.113775	3.71303	0.000204789	0.00316244	AAEL008099	Procollagen-lysine,2-oxoglutarate 5-dioxygenase [Source:UniProtKB/TrEMBL;Acc:A0A1S4FIM3]			GO:0005506,GO:0008475,GO:0016491,GO:0016705,GO:0031418,GO:0046872,GO:0051213,GO:0055114	iron ion binding,procollagen-lysine 5-dioxygenase activity,oxidoreductase activity,oxidoreductase activity, acting on paired donors, with incorporation or reduction of molecular oxygen,L-ascorbic acid binding,metal ion binding,dioxygenase activity,oxidation-reduction process
LOC5572369	553.884	-0.655896	0.176666	-3.71263	0.000205116	0.00316405	AAEL009748	2-hydroxyphytanoyl-coa lyase [Source:UniProtKB/TrEMBL;Acc:Q16UY3]			GO:0000287,GO:0003824,GO:0030976	magnesium ion binding,catalytic activity,thiamine pyrophosphate binding
LOC5573119	226.996	0.771009	0.20779	3.71052	0.00020683	0.00318703	AAEL001997				GO:0003676,GO:0003723	nucleic acid binding,RNA binding
LOC110680893	178.347	0.732323	0.19742	3.70948	0.000207689	0.00319679	AAEL026495				GO:0016020,GO:0030001,GO:0046873,GO:0055085	membrane,metal ion transport,metal ion transmembrane transporter activity,transmembrane transport
LOC5579956	461.552	0.668584	0.180377	3.70659	0.000210069	0.00322992	AAEL007593	Clip-Domain Serine Protease family C. [Source:VB Community Annotation]	CLIPC2		GO:0004252,GO:0006508,GO:0008233,GO:0008236,GO:0016787	serine-type endopeptidase activity,proteolysis,peptidase activity,serine-type peptidase activity,hydrolase activity
LOC5569908	88.1419	1.2423	0.335662	3.70104	0.000214721	0.00329788	AAEL007999
LOC5569029	69.4649	-0.970708	0.262369	-3.69979	0.000215781	0.00331059	AAEL007321				GO:0016020,GO:0016021	membrane,integral component of membrane
LOC5577547	219.559	-0.610726	0.165127	-3.69852	0.000216861	0.00332356	AAEL013260	alpha methylacyl-coa racemase [Source:VB Community Annotation]			GO:0003824,GO:0008410	catalytic activity,CoA-transferase activity
LOC110675398	382.98	-6.34498	1.71575	-3.69808	0.000217237	0.00332574	AAEL026396
LOC5572503	235.242	-0.572707	0.154965	-3.6957	0.000219279	0.00335338	AAEL022990				GO:0000145,GO:0006887,GO:0015031	exocyst,exocytosis,protein transport
LOC5565589	9097.14	-0.379724	0.102779	-3.69455	0.000220275	0.003365	AAEL004865	cyclin g [Source:VB Community Annotation]			GO:0051726	regulation of cell cycle
LOC5573383	442.141	0.467805	0.126675	3.69297	0.000221654	0.00338243	AAEL010474
LOC5577759	257.234	-4.38983	1.18946	-3.6906	0.000223725	0.00341036	AAEL003289	alkaline phosphatase [Source:VB Community Annotation]			GO:0003824,GO:0004035,GO:0016311,GO:0016787,GO:0016791,GO:0031225	catalytic activity,alkaline phosphatase activity,dephosphorylation,hydrolase activity,phosphatase activity,anchored component of membrane
LOC5572896	408.743	0.62541	0.169533	3.68901	0.000225129	0.00342808	AAEL010102	tetraspanin, putative [Source:VB Community Annotation]			GO:0016020,GO:0016021	membrane,integral component of membrane
LOC5577910	2330.26	0.53834	0.145963	3.68818	0.000225862	0.00343557	AAEL003352	60S ribosomal protein l7ae [Source:VB Community Annotation]	RpL7ae		GO:0003723,GO:0005634,GO:0005730,GO:0005840,GO:0042254,GO:1990904	RNA binding,nucleus,nucleolus,ribosome,ribosome biogenesis,ribonucleoprotein complex
LOC5577517	417.725	-0.561473	0.152564	-3.68023	0.000233019	0.00354064	AAEL021106				GO:0003824,GO:0016831,GO:0019752,GO:0030170	catalytic activity,carboxy-lyase activity,carboxylic acid metabolic process,pyridoxal phosphate binding
LOC110675806	14.5488	2.26345	0.615157	3.67947	0.000233722	0.00354752	AAEL026361				GO:0016788	hydrolase activity, acting on ester bonds
LOC5563808	424.122	0.846609	0.230192	3.67784	0.000235215	0.00356638	AAEL014138	Serine Protease Inhibitor (serpin) likely cleavage at S/L. [Source:VB Community Annotation]	SRPN16		GO:0004867,GO:0005615,GO:0010466,GO:0010951,GO:0030414	serine-type endopeptidase inhibitor activity,extracellular space,negative regulation of peptidase activity,negative regulation of endopeptidase activity,peptidase inhibitor activity
LOC5578266	2613.51	0.512759	0.139515	3.6753	0.000237573	0.00359829	AAEL003505	jun [Source:VB Community Annotation]			GO:0003677,GO:0003700,GO:0005634,GO:0006355,GO:0006357	DNA binding,DNA-binding transcription factor activity,nucleus,regulation of transcription, DNA-templated,regulation of transcription by RNA polymerase II
LOC110673984	426.92	-0.59847	0.162965	-3.67239	0.000240296	0.00363566	AAEL003188	sphingosine phosphate lyase [Source:VB Community Annotation]			GO:0003824,GO:0016829,GO:0016831,GO:0019752,GO:0030170	catalytic activity,lyase activity,carboxy-lyase activity,carboxylic acid metabolic process,pyridoxal phosphate binding
LOC110681030	27.0852	-2.26226	0.616358	-3.67036	0.000242204	0.00366064	AAEL021335				GO:0006629,GO:0016491,GO:0055114,GO:0080019,GO:0102965	lipid metabolic process,oxidoreductase activity,oxidation-reduction process,fatty-acyl-CoA reductase (alcohol-forming) activity,alcohol-forming fatty acyl-CoA reductase activity
LOC5578011	422.509	0.723417	0.197182	3.66878	0.000243709	0.00367946	AAEL003363	phosphatidic acid phosphatase [Source:VB Community Annotation]			GO:0000810,GO:0006629,GO:0006644,GO:0008195,GO:0016020,GO:0016021,GO:0046839	diacylglycerol diphosphate phosphatase activity,lipid metabolic process,phospholipid metabolic process,phosphatidate phosphatase activity,membrane,integral component of membrane,phospholipid dephosphorylation
LOC5576511	976.962	-0.871784	0.237737	-3.667	0.000245408	0.00370119	AAEL012563	lumbrokinase-3(1) precursor, putative [Source:VB Community Annotation]			GO:0004252,GO:0006508	serine-type endopeptidase activity,proteolysis
LOC5574607	495.19	-0.707141	0.192873	-3.66635	0.000246036	0.00370671	AAEL002412	monocarboxylate transporter [Source:VB Community Annotation]			GO:0016020,GO:0016021,GO:0022857,GO:0055085	membrane,integral component of membrane,transmembrane transporter activity,transmembrane transport
LOC5570058	306.387	-0.658617	0.179939	-3.66023	0.000251987	0.00379236	AAEL000217	serine/threonine protein kinase [Source:VB Community Annotation]			GO:0004672,GO:0005524,GO:0006468	protein kinase activity,ATP binding,protein phosphorylation
LOC110679400	10.9156	-3.26415	0.892317	-3.65806	0.000254133	0.0038206	AAEL021710
LOC5572209	2392.13	-1.29613	0.354559	-3.65562	0.000256566	0.00384942	AAEL009601	pyridoxine kinase [Source:VB Community Annotation]			GO:0008478,GO:0009443,GO:0016310	pyridoxal kinase activity,pyridoxal 5'-phosphate salvage,phosphorylation
LOC23687941	379.333	-0.816402	0.22333	-3.65559	0.000256592	0.00384942	AAEL019787	CCAP receptor [Source:UniProtKB/TrEMBL;Acc:A0A411JKD0]			GO:0003676,GO:0005634,GO:0046872	nucleic acid binding,nucleus,metal ion binding
LOC110677071	1086.03	2.65994	0.727814	3.6547	0.000257485	0.00385874	AAEL025678
LOC5576316	8323.67	0.473997	0.129721	3.65398	0.000258204	0.00386544	AAEL019584				GO:0004553,GO:0005576,GO:0005975,GO:0008061,GO:0008152,GO:0016787,GO:0016798,GO:0030246	hydrolase activity, hydrolyzing O-glycosyl compounds,extracellular region,carbohydrate metabolic process,chitin binding,metabolic process,hydrolase activity,hydrolase activity, acting on glycosyl bonds,carbohydrate binding
LOC5575535	3268.43	-0.59747	0.163679	-3.65025	0.000261986	0.00391793	AAEL011905	myosin i [Source:VB Community Annotation]			GO:0000166,GO:0003774,GO:0003779,GO:0005524,GO:0016459	nucleotide binding,motor activity,actin binding,ATP binding,myosin complex
LOC5579864	238.891	-0.920449	0.252348	-3.64754	0.000264766	0.00395535	AAEL005972
LOC5571386	1635.38	-0.491034	0.134719	-3.64488	0.000267513	0.00399218	AAEL009017	glutathione transferase [Source:VB Community Annotation]	GSTT1		GO:0004364,GO:0005515,GO:0016740	glutathione transferase activity,protein binding,transferase activity
LOC5565534	612.688	-0.53362	0.146545	-3.64135	0.000271214	0.00404317	AAEL019740				GO:0005634,GO:0046872	nucleus,metal ion binding
LOC110674346	33397.9	1.24191	0.34121	3.63972	0.000272932	0.00406451	AAEL025120
LOC110680965	1476.87	0.475403	0.130668	3.63826	0.000274485	0.00408336	AAEL022406				GO:0003779,GO:0005198,GO:0005856	actin binding,structural molecule activity,cytoskeleton
LOC110676873	403.144	0.559597	0.153829	3.63778	0.000275003	0.00408679	AAEL022726				GO:0004725,GO:0006470,GO:0016311,GO:0016791,GO:0035335	protein tyrosine phosphatase activity,protein dephosphorylation,dephosphorylation,phosphatase activity,peptidyl-tyrosine dephosphorylation
LOC5569739	7274.98	-0.498669	0.137136	-3.63631	0.000276567	0.00410573	AAEL007881				GO:0006464,GO:0009249	cellular protein modification process,protein lipoylation
LOC5568474	322.987	0.623664	0.171533	3.63582	0.000277102	0.00410938	AAEL006890
LOC5565959	1179.42	0.596914	0.164201	3.63526	0.000277705	0.00411403	AAEL005064	Clip-Domain Serine Protease family B. [Source:VB Community Annotation]	CLIPB5		GO:0004252,GO:0005576,GO:0006508,GO:0008233,GO:0008236,GO:0016787	serine-type endopeptidase activity,extracellular region,proteolysis,peptidase activity,serine-type peptidase activity,hydrolase activity
LOC5567824	397.556	0.529388	0.145669	3.63419	0.000278853	0.00412673	AAEL000996
LOC5566871	423.701	-0.640894	0.176389	-3.63341	0.000279699	0.00413454	AAEL000845	Protein-tyrosine phosphatase [Source:UniProtKB/TrEMBL;Acc:A0A1S4EX19]			GO:0004721,GO:0004725,GO:0005515,GO:0006470,GO:0016020,GO:0016021,GO:0016311,GO:0016787,GO:0016791,GO:0035335	phosphoprotein phosphatase activity,protein tyrosine phosphatase activity,protein binding,protein dephosphorylation,membrane,integral component of membrane,dephosphorylation,hydrolase activity,phosphatase activity,peptidyl-tyrosine dephosphorylation
LOC5572345	607.239	0.425868	0.117217	3.63317	0.000279963	0.00413454	AAEL023151				GO:0042254	ribosome biogenesis
LOC110674569	256.385	-0.635406	0.174911	-3.63275	0.000280418	0.00413687	AAEL020789
LOC5573046	261.291	-0.662296	0.182332	-3.63236	0.000280841	0.00413687	AAEL010224	transcription factor GATA-4 (GATA binding factor-4) [Source:VB Community Annotation]			GO:0003700,GO:0005634,GO:0006355,GO:0006357,GO:0008270,GO:0043565,GO:0046872	DNA-binding transcription factor activity,nucleus,regulation of transcription, DNA-templated,regulation of transcription by RNA polymerase II,zinc ion binding,sequence-specific DNA binding,metal ion binding
LOC5579119	10.3559	-2.70225	0.743966	-3.63222	0.000280994	0.00413687	AAEL003840	galectin [Source:VB Community Annotation]	GALE11		GO:0016020,GO:0016021,GO:0030246	membrane,integral component of membrane,carbohydrate binding
LOC5567903	11.1783	-2.64163	0.727704	-3.63009	0.000283326	0.00416688	AAEL006328				GO:0005576,GO:0008061	extracellular region,chitin binding
LOC5566025	209.895	-0.724782	0.199694	-3.62945	0.000284021	0.00417278	AAEL020071				GO:0046872	metal ion binding
LOC5568620	754.107	1.54317	0.425264	3.62874	0.000284809	0.00418004	AAEL006964				GO:0030246	carbohydrate binding
LOC5572103	54.1326	-1.12096	0.309144	-3.62601	0.000287832	0.00422005	AAEL009513	adenylate cyclase [Source:VB Community Annotation]			GO:0016020,GO:0016021,GO:0022857,GO:0055085	membrane,integral component of membrane,transmembrane transporter activity,transmembrane transport
LOC5575071	22.6218	2.33549	0.644461	3.62394	0.000290146	0.00424959	AAEL011624	granzyme A precursor, putative [Source:VB Community Annotation]			GO:0004252,GO:0006508,GO:0008233,GO:0008236,GO:0016787	serine-type endopeptidase activity,proteolysis,peptidase activity,serine-type peptidase activity,hydrolase activity
LOC5574145	98.9341	1.13663	0.313716	3.62311	0.00029108	0.00425813	AAEL010959	serine collagenase 1 precursor, putative [Source:VB Community Annotation]			GO:0004252,GO:0006508	serine-type endopeptidase activity,proteolysis
LOC5575799	32.7194	-1.64751	0.454749	-3.62289	0.000291328	0.00425813	AAEL012073				GO:0003824,GO:0005975	catalytic activity,carbohydrate metabolic process
LOC5565510	92.8927	-0.809295	0.223467	-3.62154	0.000292857	0.00427607	AAEL004820	zinc finger protein [Source:VB Community Annotation]			GO:0003676,GO:0005634,GO:0008270	nucleic acid binding,nucleus,zinc ion binding
LOC5566341	762.569	-0.518474	0.143239	-3.61965	0.000295001	0.00430296	AAEL005329
LOC110680634	187.195	-0.804547	0.222372	-3.61802	0.000296868	0.00432179	AAEL025133				GO:0000289,GO:0003723,GO:0006397,GO:0031251	nuclear-transcribed mRNA poly(A) tail shortening,RNA binding,mRNA processing,PAN complex
LOC5574153	19.7415	-5.21773	1.44216	-3.61799	0.000296901	0.00432179	AAEL010969
LOC5569918	24.8317	-1.68469	0.465822	-3.61659	0.000298507	0.00434073	AAEL008022	homeobox protein [Source:VB Community Annotation]			GO:0000981,GO:0003677,GO:0005634,GO:0006355,GO:0006357,GO:0007275,GO:0043565	DNA-binding transcription factor activity, RNA polymerase II-specific,DNA binding,nucleus,regulation of transcription, DNA-templated,regulation of transcription by RNA polymerase II,multicellular organism development,sequence-specific DNA binding
LOC5578855	872.338	-0.554633	0.153369	-3.61633	0.000298812	0.00434073	AAEL003709	crotonobetainyl-CoA-hydratase, putative [Source:VB Community Annotation]			GO:0003824,GO:0016020,GO:0016021	catalytic activity,membrane,integral component of membrane
LOC5571110	255.09	-0.740603	0.204894	-3.61457	0.000300851	0.00436587	AAEL001532	FAD NAD binding oxidoreductases [Source:VB Community Annotation]			GO:0046872	metal ion binding
LOC5568132	13364.3	0.371691	0.102912	3.61173	0.000304166	0.00440947	AAEL006572	troponin C [Source:VB Community Annotation]			GO:0005509	calcium ion binding
LOC5566108	6613.23	0.470598	0.130326	3.61092	0.000305112	0.00441867	AAEL027175				GO:0004597,GO:0005515,GO:0016020,GO:0016021,GO:0018193,GO:0042264,GO:0055114	peptide-aspartate beta-dioxygenase activity,protein binding,membrane,integral component of membrane,peptidyl-amino acid modification,peptidyl-aspartic acid hydroxylation,oxidation-reduction process
LOC5572044	913.567	-1.07875	0.298971	-3.60822	0.0003083	0.00446031	AAEL000256	Class B Scavenger Receptor (CD36 domain). [Source:VB Community Annotation]	SCRB9		GO:0005886,GO:0016020,GO:0016021	plasma membrane,membrane,integral component of membrane
LOC5563997	281.421	0.615894	0.170756	3.60686	0.000309924	0.00447923	AAEL014255	aquaporin, putative [Source:VB Community Annotation]			GO:0016020,GO:0016021	membrane,integral component of membrane
LOC5575526	241.851	-0.640336	0.177631	-3.60486	0.000312319	0.00450927	AAEL011900	N-acetyllactosaminide beta-1,3-N-acetylglucosaminyltransferase, putative [Source:VB Community Annotation]			GO:0016020,GO:0016021,GO:0016740	membrane,integral component of membrane,transferase activity
LOC110680734	24.6148	-4.24187	1.1773	-3.60304	0.000314518	0.00453641	AAEL027334
LOC5573885	3078.75	0.333596	0.0926805	3.59942	0.000318933	0.00459541	AAEL010798	ubiquitin-conjugating enzyme E2 g [Source:VB Community Annotation]			GO:0000166,GO:0005524,GO:0016740	nucleotide binding,ATP binding,transferase activity
LOC5568780	966.207	0.578213	0.160672	3.59872	0.000319789	0.00459951	AAEL007136	sugar transporter [Source:VB Community Annotation]			GO:0016020,GO:0016021,GO:0022857,GO:0055085	membrane,integral component of membrane,transmembrane transporter activity,transmembrane transport
LOC5574269	316.904	-4.77539	1.32699	-3.59866	0.000319865	0.00459951	AAEL013377				GO:0042302	structural constituent of cuticle
LOC5576438	339.703	-1.47072	0.408904	-3.59675	0.000322222	0.00462873	AAEL012526
LOC5566859	489.906	-0.510209	0.141916	-3.59515	0.000324204	0.00465249	AAEL000822	kinesin-like protein KLP68D [Source:VB Community Annotation]			GO:0000166,GO:0003774,GO:0003777,GO:0005524,GO:0005874,GO:0007018,GO:0008017	nucleotide binding,motor activity,microtubule motor activity,ATP binding,microtubule,microtubule-based movement,microtubule binding
LOC5575041	98.4798	-0.965321	0.268594	-3.59397	0.000325674	0.00466887	AAEL011588				GO:0016020,GO:0016021	membrane,integral component of membrane
LOC5572184	295.159	-0.708082	0.197066	-3.59312	0.000326745	0.00467951	AAEL019431	ecdysone receptor [Source:VB Community Annotation]	EcR		GO:0003677,GO:0003700,GO:0003707,GO:0004879,GO:0005634,GO:0006355,GO:0008270,GO:0035076,GO:0035100,GO:0042025,GO:0043565,GO:0046872	DNA binding,DNA-binding transcription factor activity,steroid hormone receptor activity,nuclear receptor activity,nucleus,regulation of transcription, DNA-templated,zinc ion binding,ecdysone receptor-mediated signaling pathway,ecdysone binding,host cell nucleus,sequence-specific DNA binding,metal ion binding
LOC5578693	57.8812	1.02118	0.284274	3.59222	0.000327876	0.00469097	AAEL019768				GO:0004252,GO:0006508	serine-type endopeptidase activity,proteolysis
LOC110678199	1376.4	-0.670522	0.186781	-3.58987	0.000330838	0.00472859	AAEL023555
LOC5571022	248.237	-0.549864	0.153237	-3.58831	0.000332822	0.00475216	AAEL008749	udp-glucuronosyltransferase [Source:VB Community Annotation]			GO:0008194,GO:0016020,GO:0016021,GO:0016740,GO:0016757,GO:0016758	UDP-glycosyltransferase activity,membrane,integral component of membrane,transferase activity,transferase activity, transferring glycosyl groups,transferase activity, transferring hexosyl groups
LOC5568159	30.6989	1.40793	0.39248	3.58726	0.000334177	0.00476672	AAEL006597	nk homeobox protein [Source:VB Community Annotation]			GO:0000981,GO:0003677,GO:0005634,GO:0006355,GO:0006357,GO:0043565	DNA-binding transcription factor activity, RNA polymerase II-specific,DNA binding,nucleus,regulation of transcription, DNA-templated,regulation of transcription by RNA polymerase II,sequence-specific DNA binding
LOC5578623	391.707	0.486541	0.135715	3.58502	0.000337055	0.00480144	AAEL003581	amidophosphoribosyltransferase [Source:VB Community Annotation]			GO:0004044,GO:0006164,GO:0006189,GO:0009113,GO:0009116,GO:0016740,GO:0016757,GO:0046872,GO:0051536	amidophosphoribosyltransferase activity,purine nucleotide biosynthetic process,'de novo' IMP biosynthetic process,purine nucleobase biosynthetic process,nucleoside metabolic process,transferase activity,transferase activity, transferring glycosyl groups,metal ion binding,iron-sulfur cluster binding
LOC5565208	795.229	-0.502588	0.140198	-3.58484	0.000337287	0.00480144	AAEL019898
LOC5571034	49.8647	1.14675	0.320037	3.58319	0.000339428	0.00482347	AAEL008757	Carboxylic ester hydrolase [Source:UniProtKB/TrEMBL;Acc:A0A1S4FKP8]			GO:0016787,GO:0052689	hydrolase activity,carboxylic ester hydrolase activity
LOC110676911	190.53	-0.645071	0.180043	-3.58287	0.000339842	0.00482347	AAEL027832
LOC5569003	556.206	-2.93628	0.819535	-3.58286	0.000339853	0.00482347	AAEL007305				GO:0016020,GO:0016021	membrane,integral component of membrane
LOC5568268	1521.15	0.462573	0.129133	3.58214	0.000340792	0.00483196	AAEL006700	trypsin, putative [Source:VB Community Annotation]			GO:0004252,GO:0006508	serine-type endopeptidase activity,proteolysis
LOC23687873	265.417	-1.06245	0.296633	-3.58171	0.000341357	0.00483515	AAEL017453				GO:0016491,GO:0016627,GO:0050660,GO:0055114	oxidoreductase activity,oxidoreductase activity, acting on the CH-CH group of donors,flavin adenine dinucleotide binding,oxidation-reduction process
LOC5566044	127.969	-1.26295	0.352652	-3.5813	0.000341889	0.00483787	AAEL005130	zinc finger protein [Source:VB Community Annotation]			GO:0003676	nucleic acid binding
LOC5568472	7359.97	0.366049	0.102245	3.58011	0.000343451	0.00485513	AAEL006895	phosphofructokinase [Source:VB Community Annotation]			GO:0000166,GO:0003824,GO:0003872,GO:0005524,GO:0005737,GO:0006002,GO:0006096,GO:0008152,GO:0016301,GO:0016310,GO:0016740,GO:0046872,GO:0061615	nucleotide binding,catalytic activity,6-phosphofructokinase activity,ATP binding,cytoplasm,fructose 6-phosphate metabolic process,glycolytic process,metabolic process,kinase activity,phosphorylation,transferase activity,metal ion binding,glycolytic process through fructose-6-phosphate
LOC5575889	34.956	-3.13535	0.876	-3.57917	0.000344689	0.00486779	AAEL002057				GO:0003676,GO:0005634,GO:0008270,GO:0046872	nucleic acid binding,nucleus,zinc ion binding,metal ion binding
LOC5565951	3338.53	-0.564126	0.157626	-3.57889	0.000345053	0.00486809	AAEL024837				GO:0003824	catalytic activity
LOC5568379	140.3	0.783695	0.219033	3.57798	0.000346257	0.00488023	AAEL024260				GO:0000070,GO:0007062,GO:0016407,GO:0045132	mitotic sister chromatid segregation,sister chromatid cohesion,acetyltransferase activity,meiotic chromosome segregation
LOC5573269	429.645	0.537038	0.150361	3.57166	0.000354719	0.00499454	AAEL019544				GO:0003824	catalytic activity
LOC5577186	308.902	-0.573817	0.160732	-3.57003	0.000356936	0.00502079	AAEL013065	thiamin pyrophosphokinase [Source:VB Community Annotation]			GO:0016787	hydrolase activity
LOC5567836	183.739	-0.719982	0.201707	-3.56945	0.000357725	0.00502691	AAEL001009	dab2-interacting protein [Source:VB Community Annotation]			GO:0005515,GO:0016301,GO:0016310	protein binding,kinase activity,phosphorylation
LOC23687765	1438.95	1.07151	0.300526	3.56547	0.000363209	0.00509572	AAEL017345
LOC5574611	31024.3	-0.700403	0.196446	-3.56537	0.000363339	0.00509572	AAEL029015
LOC5579909	113.58	-3.34908	0.939487	-3.5648	0.000364141	0.00509983	AAEL024627
LOC110676190	10233	1.07989	0.302945	3.56464	0.000364351	0.00509983	AAEL025037
LOC5580173	68832.6	0.457643	0.128402	3.56413	0.000365067	0.00510483	AAEL002572	myosin regulatory light chain 2 (mlc-2) [Source:VB Community Annotation]			GO:0005509	calcium ion binding
LOC5574272	433.298	0.611912	0.171722	3.56338	0.000366104	0.00510721	AAEL005392	dihydropyridine-sensitive l-type calcium channel [Source:VB Community Annotation]			GO:0005244,GO:0005262,GO:0006811,GO:0006816,GO:0016020,GO:0016021,GO:0034765,GO:0070588	voltage-gated ion channel activity,calcium channel activity,ion transport,calcium ion transport,membrane,integral component of membrane,regulation of ion transmembrane transport,calcium ion transmembrane transport
LOC5569514	4312.7	0.38443	0.107888	3.56324	0.000366303	0.00510721	AAEL007702	chaperonin [Source:VB Community Annotation]			GO:0000166,GO:0005524,GO:0005737,GO:0006457,GO:0051082	nucleotide binding,ATP binding,cytoplasm,protein folding,unfolded protein binding
LOC5575902	423.157	-3.29485	0.92468	-3.56323	0.000366316	0.00510721	AAEL012148
LOC5577767	726.241	-0.953751	0.267703	-3.56273	0.000367024	0.00511207	AAEL003284				GO:0005576,GO:0006030,GO:0008061	extracellular region,chitin metabolic process,chitin binding
LOC110674233	42.9651	-1.23175	0.345846	-3.56155	0.000368671	0.00512998	AAEL020626
LOC5570605	154.378	-0.721899	0.202735	-3.56079	0.000369738	0.0051398	AAEL027597				GO:0004672,GO:0005524,GO:0006468	protein kinase activity,ATP binding,protein phosphorylation
LOC5564914	173.98	-1.34157	0.3768	-3.56043	0.000370242	0.00514177	AAEL014655
LOC5566250	279.692	-1.54961	0.435301	-3.55985	0.000371069	0.00514821	AAEL015109	Clip-Domain Serine Protease family D. [Source:VB Community Annotation]	CLIPD10		GO:0004252,GO:0006508	serine-type endopeptidase activity,proteolysis
LOC5578694	110.763	0.780536	0.219566	3.55491	0.000378112	0.00524082	AAEL015637	serine carboxypeptidase, putative [Source:VB Community Annotation]			GO:0004252,GO:0005576,GO:0006508,GO:0008233,GO:0008236,GO:0016787	serine-type endopeptidase activity,extracellular region,proteolysis,peptidase activity,serine-type peptidase activity,hydrolase activity
LOC5574400	615.179	-0.648538	0.182542	-3.55282	0.000381121	0.00527737	AAEL011112	alcohol dehydrogenase [Source:VB Community Annotation]			GO:0008270,GO:0016491,GO:0046872,GO:0055114	zinc ion binding,oxidoreductase activity,metal ion binding,oxidation-reduction process
LOC5567194	5226.46	-0.845747	0.238142	-3.55143	0.000383138	0.00530014	AAEL000859
LOC5579115	674.783	0.747286	0.210458	3.55077	0.000384106	0.00530835	AAEL003864
LOC5575821	460.86	-0.64949	0.18297	-3.5497	0.000385671	0.00532481	AAEL012091				GO:0003677,GO:0005634,GO:0006338	DNA binding,nucleus,chromatin remodeling
LOC110678029	67.5188	1.50949	0.425442	3.54804	0.000388103	0.00535319	AAEL021557	poor Imd response upon knock-in [Source:VB Community Annotation]	pirk
LOC5577552	104.241	-0.835116	0.235515	-3.54592	0.000391244	0.00539127	AAEL013262				GO:0004568,GO:0006032,GO:0016998	chitinase activity,chitin catabolic process,cell wall macromolecule catabolic process
LOC110673997	615.659	-0.648656	0.183046	-3.54368	0.000394577	0.00543194	AAEL024696
LOC5567579	517.51	-0.475142	0.134095	-3.54334	0.000395094	0.00543379	AAEL006178
LOC5580010	1895.17	-0.434046	0.122506	-3.54305	0.000395533	0.00543456	AAEL009637	cathepsin b [Source:VB Community Annotation]			GO:0004197,GO:0006508,GO:0008233,GO:0008234,GO:0016787,GO:0050790	cysteine-type endopeptidase activity,proteolysis,peptidase activity,cysteine-type peptidase activity,hydrolase activity,regulation of catalytic activity
LOC5573116	1610.03	-0.337129	0.095189	-3.54168	0.00039759	0.00545754	AAEL002031	cytochrome P450 [Source:VB Community Annotation]	CYP12F7		GO:0004497,GO:0005506,GO:0005789,GO:0016020,GO:0016491,GO:0016705,GO:0020037,GO:0031090,GO:0046872,GO:0055114	monooxygenase activity,iron ion binding,endoplasmic reticulum membrane,membrane,oxidoreductase activity,oxidoreductase activity, acting on paired donors, with incorporation or reduction of molecular oxygen,heme binding,organelle membrane,metal ion binding,oxidation-reduction process
LOC5567206	287.941	1.42174	0.401757	3.53879	0.000401962	0.00551057	AAEL021128				GO:0016787,GO:0052689	hydrolase activity,carboxylic ester hydrolase activity
LOC5573154	6368.27	0.939391	0.265468	3.53862	0.000402229	0.00551057	AAEL002035	protein serine/threonine kinase, putative [Source:VB Community Annotation]
LOC5568656	821.171	0.375508	0.106162	3.53712	0.000404519	0.00553661	AAEL021861				GO:0004497,GO:0005506,GO:0005789,GO:0016020,GO:0016491,GO:0016705,GO:0020037,GO:0031090,GO:0046872,GO:0055114	monooxygenase activity,iron ion binding,endoplasmic reticulum membrane,membrane,oxidoreductase activity,oxidoreductase activity, acting on paired donors, with incorporation or reduction of molecular oxygen,heme binding,organelle membrane,metal ion binding,oxidation-reduction process
LOC5568650	144.912	0.71208	0.20135	3.53653	0.000405415	0.00554216	AAEL007016	sodium/solute symporter [Source:VB Community Annotation]			GO:0016020,GO:0016021,GO:0022857,GO:0055085	membrane,integral component of membrane,transmembrane transporter activity,transmembrane transport
LOC5572323	1946.09	-0.341981	0.0967047	-3.53635	0.000405704	0.00554216	AAEL009706	ns1 binding protein [Source:VB Community Annotation]			GO:0003779,GO:0005515	actin binding,protein binding
LOC5563763	1349.13	-0.407032	0.11525	-3.53174	0.000412842	0.00563425	AAEL014252	sulfite reductase [Source:VB Community Annotation]			GO:0006790,GO:0008482,GO:0016491,GO:0030151,GO:0046872,GO:0055114	sulfur compound metabolic process,sulfite oxidase activity,oxidoreductase activity,molybdenum ion binding,metal ion binding,oxidation-reduction process
LOC5566161	654.456	0.445482	0.126152	3.53131	0.000413514	0.00563799	AAEL005224				GO:0016020,GO:0016021	membrane,integral component of membrane
LOC5564528	1666	-0.511963	0.145	-3.53077	0.000414355	0.00564081	AAEL014493	aldehyde oxidase [Source:VB Community Annotation]			GO:0004854,GO:0004855,GO:0005506,GO:0005777,GO:0009055,GO:0016491,GO:0022900,GO:0043546,GO:0046872,GO:0050660,GO:0051536,GO:0051537,GO:0055114,GO:0071949	xanthine dehydrogenase activity,xanthine oxidase activity,iron ion binding,peroxisome,electron transfer activity,oxidoreductase activity,electron transport chain,molybdopterin cofactor binding,metal ion binding,flavin adenine dinucleotide binding,iron-sulfur cluster binding,2 iron, 2 sulfur cluster binding,oxidation-reduction process,FAD binding
LOC5567804	4.1842	-5.44791	1.5432	-3.53026	0.00041515	0.00564081	AAEL000108	leucine aminopeptidase [Source:VB Community Annotation]			GO:0004177,GO:0005737,GO:0006508,GO:0008233,GO:0008235,GO:0016787,GO:0019538,GO:0030145,GO:0070006	aminopeptidase activity,cytoplasm,proteolysis,peptidase activity,metalloexopeptidase activity,hydrolase activity,protein metabolic process,manganese ion binding,metalloaminopeptidase activity
LOC5575170	73.543	0.995283	0.281931	3.53024	0.000415189	0.00564081	AAEL000312
LOC5576131	642.811	0.758637	0.214902	3.53016	0.000415308	0.00564081	AAEL002796	l-asparaginase i [Source:VB Community Annotation]			GO:0004067,GO:0005515,GO:0006520	asparaginase activity,protein binding,cellular amino acid metabolic process
LOC5579888	777.255	-0.721813	0.204501	-3.52963	0.000416149	0.00564281	AAEL001046	phosphatase fragment [Source:VB Community Annotation]			GO:0004725,GO:0006470,GO:0016311,GO:0016791,GO:0035335	protein tyrosine phosphatase activity,protein dephosphorylation,dephosphorylation,phosphatase activity,peptidyl-tyrosine dephosphorylation
LOC5577299	32.1256	-2.0471	0.579987	-3.52956	0.00041625	0.00564281	AAEL013156				GO:0016020,GO:0016021	membrane,integral component of membrane
LOC5568103	3990.99	-0.46278	0.131219	-3.52677	0.00042066	0.00569559	AAEL006538	peroxisomal membrane protein 2, pxmp2 [Source:VB Community Annotation]			GO:0016020,GO:0016021	membrane,integral component of membrane
LOC5576268	859.266	0.382539	0.10848	3.52636	0.000421312	0.00569559	AAEL012427				GO:0016491,GO:0016620,GO:0055114	oxidoreductase activity,oxidoreductase activity, acting on the aldehyde or oxo group of donors, NAD or NADP as acceptor,oxidation-reduction process
LOC5571304	2857.3	0.665106	0.188611	3.52634	0.000421346	0.00569559	AAEL008953				GO:0003677,GO:0003700,GO:0006355,GO:0006357	DNA binding,DNA-binding transcription factor activity,regulation of transcription, DNA-templated,regulation of transcription by RNA polymerase II
LOC5563559	8.61329	-6.50142	1.84385	-3.526	0.00042189	0.00569752	AAEL026496
LOC110678888	161.284	0.74969	0.21264	3.52564	0.000422464	0.00569986	AAEL027364
LOC110676707	16.0014	2.09721	0.595155	3.5238	0.000425404	0.00573408	AAEL020691
LOC5580194	2866.95	-0.374371	0.106323	-3.52108	0.000429792	0.00578773	AAEL002539	fimbrin/plastin [Source:VB Community Annotation]			GO:0003779,GO:0005509,GO:0005515,GO:0051015,GO:0051017	actin binding,calcium ion binding,protein binding,actin filament binding,actin filament bundle assembly
LOC5578329	986.719	0.672415	0.191254	3.51581	0.000438409	0.00589818	AAEL013649	elongase, putative [Source:VB Community Annotation]			GO:0006629,GO:0006631,GO:0006633,GO:0016020,GO:0016021,GO:0016740,GO:0102336,GO:0102337,GO:0102338,GO:0102756	lipid metabolic process,fatty acid metabolic process,fatty acid biosynthetic process,membrane,integral component of membrane,transferase activity,3-oxo-arachidoyl-CoA synthase activity,3-oxo-cerotoyl-CoA synthase activity,3-oxo-lignoceronyl-CoA synthase activity,very-long-chain 3-ketoacyl-CoA synthase activity
LOC5566824	14054.3	0.548087	0.15606	3.51201	0.000444723	0.00597746	AAEL022609				GO:0001952,GO:0005515,GO:0015629,GO:0051371	regulation of cell-matrix adhesion,protein binding,actin cytoskeleton,muscle alpha-actinin binding
LOC5570618	1006.15	-0.676481	0.192913	-3.50667	0.000453749	0.00609301	AAEL008426	broad-complex core-protein [Source:VB Community Annotation]			GO:0003676,GO:0005515	nucleic acid binding,protein binding
LOC110677813	307.428	-0.58126	0.165843	-3.50488	0.000456819	0.00612844	AAEL024098				GO:0005634	nucleus
LOC5580129	5291.05	0.396195	0.113079	3.50369	0.000458858	0.00615	AAEL002436				GO:0005261,GO:0006811,GO:0015672,GO:0016020,GO:0016021,GO:0034220,GO:0098655	cation channel activity,ion transport,monovalent inorganic cation transport,membrane,integral component of membrane,ion transmembrane transport,cation transmembrane transport
LOC5571397	4402.24	-0.382639	0.109234	-3.50293	0.000460179	0.00616161	AAEL009029	aldehyde dehydrogenase [Source:VB Community Annotation]	ALDH9029	ALDH	GO:0016491,GO:0016620,GO:0055114	oxidoreductase activity,oxidoreductase activity, acting on the aldehyde or oxo group of donors, NAD or NADP as acceptor,oxidation-reduction process
LOC5573422	127.367	0.753153	0.215021	3.50269	0.000460592	0.00616161	AAEL002043	cytochrome P450 [Source:VB Community Annotation]	CYP305A5		GO:0004497,GO:0005506,GO:0016491,GO:0016705,GO:0020037,GO:0046872,GO:0055114	monooxygenase activity,iron ion binding,oxidoreductase activity,oxidoreductase activity, acting on paired donors, with incorporation or reduction of molecular oxygen,heme binding,metal ion binding,oxidation-reduction process
LOC5575995	47645.6	0.387609	0.110713	3.50102	0.000463486	0.00618873	AAEL002761	tropomyosin invertebrate [Source:VB Community Annotation]
LOC5571664	20182.4	0.31465	0.0898739	3.50101	0.000463491	0.00618873	AAEL024228				GO:0000015,GO:0000287,GO:0004634,GO:0006096,GO:0016829	phosphopyruvate hydratase complex,magnesium ion binding,phosphopyruvate hydratase activity,glycolytic process,lyase activity
LOC110674731	491.811	1.22435	0.349915	3.499	0.000467002	0.00622977
LOC110678026	26.2636	1.54209	0.440767	3.49867	0.000467593	0.00623131	AAEL023080
LOC110675576	48.1165	1.15487	0.330109	3.49844	0.000467995	0.00623131	AAEL022079
LOC5571268	771.652	-0.674201	0.192749	-3.49782	0.000469084	0.00623995	AAEL001584				GO:0005509,GO:0016020,GO:0016021	calcium ion binding,membrane,integral component of membrane
LOC5564618	2854.65	-0.734265	0.209986	-3.49673	0.000471002	0.00625961	AAEL014541	maltose phosphorylase [Source:VB Community Annotation]			GO:0003824,GO:0005975	catalytic activity,carbohydrate metabolic process
LOC23687777	2456.5	-0.39682	0.113515	-3.49574	0.00047274	0.0062754	AAEL017357				GO:0004842,GO:0005634,GO:0005654,GO:0006281,GO:0006974,GO:0008270,GO:0016567	ubiquitin-protein transferase activity,nucleus,nucleoplasm,DNA repair,cellular response to DNA damage stimulus,zinc ion binding,protein ubiquitination
LOC110679519	1461.78	-0.593823	0.169879	-3.49556	0.000473073	0.0062754	AAEL023611				GO:0003824	catalytic activity
LOC5576661	111.128	-0.762837	0.218726	-3.48764	0.000487304	0.00645814	AAEL012687	juvenile hormone-inducible protein, putative [Source:VB Community Annotation]
LOC5571832	197305	0.410565	0.117736	3.48718	0.00048815	0.00646332	AAEL001673	actin [Source:VB Community Annotation]			GO:0005524,GO:0005737,GO:0005856	ATP binding,cytoplasm,cytoskeleton
LOC110677173	289.28	-3.81716	1.09509	-3.48571	0.000490837	0.00649285	AAEL025558
LOC110676625	9.46599	-4.69867	1.34833	-3.4848	0.000492513	0.00650896	AAEL024839
LOC5570258	529.32	0.583927	0.167776	3.4804	0.000500656	0.00661043	AAEL008220
casRx	3.77355	5.43217	1.56131	3.47925	0.000502826	0.00662869
LOC5572750	4394.11	0.425597	0.122327	3.47917	0.000502972	0.00662869	AAEL010037	phosphoglucomutase [Source:VB Community Annotation]			GO:0000287,GO:0005975,GO:0006006,GO:0016853,GO:0016868,GO:0046872,GO:0071704	magnesium ion binding,carbohydrate metabolic process,glucose metabolic process,isomerase activity,intramolecular transferase activity, phosphotransferases,metal ion binding,organic substance metabolic process
LOC5577696	304.254	0.591152	0.169997	3.47744	0.000506232	0.00666546	AAEL023423				GO:0000166,GO:0004672,GO:0004674,GO:0005524,GO:0006468	nucleotide binding,protein kinase activity,protein serine/threonine kinase activity,ATP binding,protein phosphorylation
LOC5567569	110.873	-0.770688	0.221705	-3.47618	0.000508604	0.00669049	AAEL006159				GO:0005576,GO:0006030,GO:0008061	extracellular region,chitin metabolic process,chitin binding
LOC5575305	2045.04	-0.581773	0.167387	-3.47563	0.000509659	0.00669583	AAEL002578				GO:0016020,GO:0016021,GO:0019991	membrane,integral component of membrane,septate junction assembly
LOC5575303	9.82652	-2.84752	0.819319	-3.47547	0.000509952	0.00669583	AAEL027796
LOC110680584	26777.8	0.456641	0.131405	3.47506	0.000510741	0.0067	AAEL026967				GO:0005861,GO:0006937	troponin complex,regulation of muscle contraction
LOC5574236	726.108	-1.06509	0.306672	-3.47304	0.000514591	0.00674428	AAEL011004
LOC5567826	396.873	0.521775	0.150283	3.47196	0.000516671	0.00676529	AAEL000978				GO:0005634,GO:0005730,GO:0006364	nucleus,nucleolus,rRNA processing
LOC23687800	10.2085	2.97047	0.855842	3.47081	0.000518887	0.00678806	AAEL017380
LOC5565025	2286.62	0.406386	0.117123	3.46975	0.000520936	0.00680859	AAEL014702	lysyl-tRNA synthetase [Source:VB Community Annotation]			GO:0000166,GO:0003676,GO:0004812,GO:0004824,GO:0005524,GO:0005737,GO:0006418,GO:0006430	nucleotide binding,nucleic acid binding,aminoacyl-tRNA ligase activity,lysine-tRNA ligase activity,ATP binding,cytoplasm,tRNA aminoacylation for protein translation,lysyl-tRNA aminoacylation
LOC110680788	310.22	0.598104	0.172525	3.46676	0.000526778	0.00687229	AAEL026876				GO:0004252,GO:0006508	serine-type endopeptidase activity,proteolysis
LOC5576684	310.22	0.598104	0.172525	3.46676	0.000526778	0.00687229	AAEL012713	Clip-Domain Serine Protease family C. [Source:VB Community Annotation]	CLIPC16		GO:0004252,GO:0006508	serine-type endopeptidase activity,proteolysis
LOC5577720	155.222	0.892343	0.257481	3.46567	0.00052891	0.00689378	AAEL013355				GO:0005515	protein binding
LOC110677018	3.84943	-5.33683	1.54041	-3.46455	0.000531127	0.00691634	AAEL026372
LOC110676499	14.9193	2.07421	0.598815	3.46386	0.000532492	0.00691845	AAEL025722
LOC5578743	3495.35	0.37414	0.108018	3.46367	0.000532856	0.00691845	AAEL003658	laminin beta-2 chain [Source:VB Community Annotation]			GO:0005604,GO:0016020	basement membrane,membrane
LOC5576308	82.9286	0.952534	0.275009	3.46365	0.000532905	0.00691845	AAEL021904				GO:0005509,GO:0005576	calcium ion binding,extracellular region
LOC110680290	75.7951	-1.01947	0.294351	-3.46346	0.00053328	0.00691845	AAEL022167				GO:0003676	nucleic acid binding
LOC5567778	580.688	-0.552941	0.15966	-3.46323	0.000533724	0.00691845	AAEL000127	AMP dependent coa ligase [Source:VB Community Annotation]			GO:0003824	catalytic activity
LOC5570083	55.8573	1.2121	0.350051	3.46264	0.000534904	0.00692742	AAEL001325				GO:0016020,GO:0016021	membrane,integral component of membrane
LOC5569892	148.97	0.76825	0.221912	3.46195	0.000536275	0.00693885	AAEL007992	trypsin, putative [Source:VB Community Annotation]			GO:0004252,GO:0006508,GO:0008233,GO:0008236,GO:0016787	serine-type endopeptidase activity,proteolysis,peptidase activity,serine-type peptidase activity,hydrolase activity
LOC110679587	3790.56	0.386442	0.111728	3.45877	0.000542654	0.007015	AAEL022005
LOC110679554	1041.79	0.346371	0.100242	3.45535	0.000549576	0.00709802	AAEL021861
LOC5571019	503.845	-0.604357	0.174919	-3.45506	0.000550169	0.00709923	AAEL008751	glucosyl/glucuronosyl transferases [Source:VB Community Annotation]			GO:0008194,GO:0016020,GO:0016021,GO:0016740,GO:0016757,GO:0016758	UDP-glycosyltransferase activity,membrane,integral component of membrane,transferase activity,transferase activity, transferring glycosyl groups,transferase activity, transferring hexosyl groups
LOC110678733	101.956	-3.37997	0.978426	-3.4545	0.000551312	0.00710752	AAEL002126	Clip-Domain Serine Protease family A. Protease homologue. [Source:VB Community Annotation]	CLIPA15		GO:0004252,GO:0006508	serine-type endopeptidase activity,proteolysis
LOC5566033	561.577	-0.541457	0.15679	-3.4534	0.000553561	0.00712978	AAEL019679
LOC5574108	168.187	0.777774	0.225246	3.45299	0.000554411	0.00712978	AAEL002254				GO:0004252,GO:0006508	serine-type endopeptidase activity,proteolysis
LOC110675277	31.2723	-1.34051	0.388224	-3.45292	0.000554544	0.00712978	AAEL022884
LOC5575927	172.995	-4.08341	1.18369	-3.44973	0.000561155	0.00720826	AAEL012164	spaetzle-like cytokine [Source:VB Community Annotation]	SPZ6
LOC110677746	3.7557	-5.29778	1.53588	-3.44935	0.000561946	0.0072119	AAEL021740
LOC5574177	414.832	0.608394	0.176431	3.44833	0.000564056	0.00723244	AAEL019955				GO:0008271,GO:0008272,GO:0015116,GO:0016020,GO:0016021,GO:0055085,GO:1902358	secondary active sulfate transmembrane transporter activity,sulfate transport,sulfate transmembrane transporter activity,membrane,integral component of membrane,transmembrane transport,sulfate transmembrane transport
LOC5575513	4173.06	-0.661078	0.19173	-3.44796	0.000564829	0.00723582	AAEL011888	serine-type enodpeptidase, [Source:VB Community Annotation]			GO:0004252,GO:0006508	serine-type endopeptidase activity,proteolysis
LOC5568906	157.187	-3.27376	0.949773	-3.44689	0.000567082	0.00725813	AAEL007217				GO:0016020,GO:0016021	membrane,integral component of membrane
LOC5577039	205.747	0.556193	0.161639	3.44095	0.000579677	0.00741267	AAEL012955	phosphatidylethanolamine-binding protein [Source:VB Community Annotation]
LOC5568986	16449.2	0.473861	0.137758	3.4398	0.000582144	0.00743751	AAEL007306	alpha-actinin [Source:VB Community Annotation]			GO:0003779,GO:0005509,GO:0005515	actin binding,calcium ion binding,protein binding
LOC5577937	139.814	-1.05228	0.306053	-3.43824	0.000585516	0.00747388	AAEL013417	fibrinogen and fibronectin [Source:VB Community Annotation]
LOC5580145	19.383	1.96813	0.57253	3.4376	0.000586903	0.00747605	AAEL002447
LOC110676455	24.8999	-2.01994	0.587631	-3.43744	0.000587243	0.00747605	AAEL021424
LOC5564249	6045.95	-0.450057	0.130929	-3.43743	0.000587265	0.00747605	AAEL004195	membrane associated progesterone receptor [Source:VB Community Annotation]			GO:0016020,GO:0016021	membrane,integral component of membrane
LOC5568615	33.5309	-2.81078	0.817856	-3.43677	0.000588693	0.00748371	AAEL006980	lipase [Source:VB Community Annotation]			GO:0004806,GO:0005576,GO:0052689	triglyceride lipase activity,extracellular region,carboxylic ester hydrolase activity
LOC5571298	1216.17	-0.381029	0.110882	-3.43634	0.000589622	0.00748371	AAEL001548	glucosyl/glucuronosyl transferases [Source:VB Community Annotation]			GO:0008194,GO:0016020,GO:0016021,GO:0016740,GO:0016757,GO:0016758	UDP-glycosyltransferase activity,membrane,integral component of membrane,transferase activity,transferase activity, transferring glycosyl groups,transferase activity, transferring hexosyl groups
LOC23687815	3464.77	0.544707	0.158519	3.43623	0.000589874	0.00748371	AAEL017395				GO:0016020,GO:0016021,GO:0022857	membrane,integral component of membrane,transmembrane transporter activity
LOC110675782	190.004	-0.679646	0.197791	-3.43618	0.000589974	0.00748371	AAEL025123
LOC110679163	1824.76	-0.446287	0.129901	-3.43561	0.000591232	0.00749299	AAEL000427				GO:0016020,GO:0016021,GO:0016746	membrane,integral component of membrane,transferase activity, transferring acyl groups
LOC5573604	217.191	0.597316	0.17392	3.43444	0.00059378	0.00751857	AAEL002108	nucleolar essential protein 1 (nep1) [Source:VB Community Annotation]			GO:0003723,GO:0008168,GO:0019843,GO:0042254	RNA binding,methyltransferase activity,rRNA binding,ribosome biogenesis
LOC5573260	1631.19	0.385963	0.112472	3.43165	0.000599932	0.0075897	AAEL010359	ATP-dependent transporter [Source:VB Community Annotation]			GO:0000166,GO:0005524,GO:0016887	nucleotide binding,ATP binding,ATPase activity
LOC5576304	886.103	-0.432556	0.126135	-3.42931	0.000605129	0.00764287	AAEL012463				GO:0008270	zinc ion binding
LOC5572933	3.64167	5.37816	1.56831	3.42927	0.000605211	0.00764287	AAEL010137	ketoreductase, putative [Source:VB Community Annotation]			GO:0016491,GO:0055114	oxidoreductase activity,oxidation-reduction process
LOC5565520	276.682	0.706781	0.206135	3.42874	0.000606399	0.00765108	AAEL014871	methylenetetrahydrofolate dehydrogenase [Source:VB Community Annotation]			GO:0003824,GO:0004477,GO:0004488,GO:0006730,GO:0016491,GO:0016787,GO:0055114	catalytic activity,methenyltetrahydrofolate cyclohydrolase activity,methylenetetrahydrofolate dehydrogenase (NADP+) activity,one-carbon metabolic process,oxidoreductase activity,hydrolase activity,oxidation-reduction process
LOC5578888	110.617	-0.761064	0.222006	-3.42813	0.000607756	0.00766138	AAEL019465				GO:0003779,GO:0005856,GO:0007015,GO:2000601	actin binding,cytoskeleton,actin filament organization,positive regulation of Arp2/3 complex-mediated actin nucleation
LOC110678975	25.7369	1.50277	0.438395	3.42789	0.000608294	0.00766138	AAEL023226
LOC5578624	390.561	-0.46627	0.136161	-3.4244	0.000616169	0.00775369	AAEL003597	leucine-rich transmembrane protein [Source:VB Community Annotation]			GO:0005515,GO:0016020,GO:0016021	protein binding,membrane,integral component of membrane
LOC5576251	1431.77	-0.42749	0.12489	-3.42293	0.000619496	0.00778865	AAEL012409	pantothenate kinase [Source:VB Community Annotation]			GO:0000166,GO:0004594,GO:0005524,GO:0015937,GO:0016310	nucleotide binding,pantothenate kinase activity,ATP binding,coenzyme A biosynthetic process,phosphorylation
LOC5572751	2039.95	-0.417113	0.121867	-3.42268	0.000620076	0.00778906	AAEL010027	CRAL/TRIO domain-containing protein [Source:VB Community Annotation]
LOC5575759	3554.47	0.339755	0.0992851	3.42201	0.000621593	0.00780121	AAEL019529				GO:0003676,GO:0005515,GO:0005634	nucleic acid binding,protein binding,nucleus
LOC5569113	75.8094	-1.05691	0.308968	-3.42078	0.000624416	0.00782972	AAEL007378				GO:0016020,GO:0016021,GO:0022857,GO:0055085	membrane,integral component of membrane,transmembrane transporter activity,transmembrane transport
LOC5566572	238.701	0.684246	0.200071	3.42002	0.000626171	0.00784481	AAEL005496	Zinc/iron transporter [Source:UniProtKB/TrEMBL;Acc:A0A1S4FAQ0]			GO:0016020,GO:0016021,GO:0030001,GO:0046873,GO:0055085	membrane,integral component of membrane,metal ion transport,metal ion transmembrane transporter activity,transmembrane transport
LOC5569397	261.926	-0.808146	0.236347	-3.41931	0.000627796	0.00785823	AAEL007603	odorant binding protein (OBP10) [Source:VB Community Annotation]	OBP10		GO:0005549	odorant binding
LOC5574348	1282.9	0.466797	0.136551	3.41847	0.000629738	0.0078756	AAEL002350				GO:0016020,GO:0016021	membrane,integral component of membrane
LOC5573153	1964.95	0.982425	0.288212	3.40868	0.000652773	0.0081565	AAEL002021	protein serine/threonine kinase, putative [Source:VB Community Annotation]
LOC110676656	5.39763	-4.81108	1.4117	-3.40801	0.000654374	0.00816739	AAEL021458
LOC5574590	2097.24	-0.628686	0.184482	-3.40784	0.000654794	0.00816739	AAEL002416	short-chain dehydrogenase [Source:VB Community Annotation]			GO:0005777,GO:0055114	peroxisome,oxidation-reduction process
LOC5569051	27.2768	-2.39861	0.704304	-3.40565	0.000660072	0.008226	AAEL019744				GO:0005216,GO:0006811,GO:0016020,GO:0016021,GO:0034220,GO:0055085	ion channel activity,ion transport,membrane,integral component of membrane,ion transmembrane transport,transmembrane transport
LOC5576554	277.352	0.866844	0.254585	3.40493	0.000661819	0.00823894	AAEL027356				GO:0005515	protein binding
LOC5569260	162.567	-1.12058	0.329124	-3.40474	0.00066227	0.00823894	AAEL026347				GO:0004252,GO:0006508,GO:0008233,GO:0008236,GO:0016787	serine-type endopeptidase activity,proteolysis,peptidase activity,serine-type peptidase activity,hydrolase activity
LOC110679266	3.75264	-5.29673	1.55673	-3.40247	0.000667809	0.00830011	AAEL024072
LOC110681143	213.302	-0.62297	0.183106	-3.40224	0.000668355	0.00830011	AAEL023181				GO:0016020,GO:0016021	membrane,integral component of membrane
LOC5575111	264.238	0.609136	0.179381	3.39578	0.000684343	0.00849123	AAEL011658	plasma glutamate carboxypeptidase [Source:VB Community Annotation]			GO:0005764,GO:0005783,GO:0005794,GO:0006508,GO:0016020,GO:0016021,GO:0070573	lysosome,endoplasmic reticulum,Golgi apparatus,proteolysis,membrane,integral component of membrane,metallodipeptidase activity
LOC5568073	349.684	0.74899	0.220695	3.39378	0.000689359	0.00854601	AAEL006535				GO:0004888,GO:0005216,GO:0005230,GO:0005886,GO:0006811,GO:0016020,GO:0016021,GO:0022848,GO:0030054,GO:0034220,GO:0045202,GO:0045211,GO:0060078,GO:0060079	transmembrane signaling receptor activity,ion channel activity,extracellular ligand-gated ion channel activity,plasma membrane,ion transport,membrane,integral component of membrane,acetylcholine-gated cation-selective channel activity,cell junction,ion transmembrane transport,synapse,postsynaptic membrane,regulation of postsynaptic membrane potential,excitatory postsynaptic potential
LOC5573886	59.6168	-1.02383	0.30184	-3.39196	0.000693933	0.00859521	AAEL010804	calcium/calmodulin-dependent protein kinase kinase [Source:VB Community Annotation]			GO:0000166,GO:0004672,GO:0005524,GO:0006468	nucleotide binding,protein kinase activity,ATP binding,protein phosphorylation
LOC5572935	213.474	-0.620005	0.18285	-3.39078	0.000696934	0.00862487	AAEL010157	microsomal glutathione s-transferase [Source:VB Community Annotation]			GO:0016020,GO:0016021	membrane,integral component of membrane
LOC5578272	4.74942	-5.62999	1.6633	-3.38483	0.000712233	0.00880652	AAEL003501
LOC5569442	332.532	0.537933	0.158944	3.38443	0.000713272	0.0088117	AAEL022844				GO:0006812,GO:0006829,GO:0008324,GO:0016020,GO:0016021,GO:0055085,GO:0098655	cation transport,zinc ion transport,cation transmembrane transporter activity,membrane,integral component of membrane,transmembrane transport,cation transmembrane transport
LOC5573476	153.245	-7.72617	2.28306	-3.38412	0.000714056	0.00881372	AAEL010531
LOC5567210	114.967	-1.53906	0.454895	-3.38333	0.000716133	0.00882613	AAEL000869	zinc finger protein [Source:VB Community Annotation]			GO:0003676,GO:0006355	nucleic acid binding,regulation of transcription, DNA-templated
LOC5565121	533.484	-0.538904	0.159285	-3.38326	0.000716304	0.00882613	AAEL014732				GO:0005515,GO:0006986,GO:0016020,GO:0016021	protein binding,response to unfolded protein,membrane,integral component of membrane
LOC5577643	6475.51	1.11339	0.329128	3.38285	0.000717378	0.00883171	AAEL003239	pupal cuticle protein, putative [Source:VB Community Annotation]			GO:0042302	structural constituent of cuticle
LOC110674013	921.849	0.447696	0.132396	3.3815	0.000720905	0.00886745	AAEL021035				GO:0005789,GO:0016020,GO:0030314	endoplasmic reticulum membrane,membrane,junctional membrane complex
LOC110676689	3.46683	5.30729	1.56972	3.38104	0.000722132	0.00887485	AAEL026209
LOC5579023	974.23	0.471324	0.13942	3.38061	0.000723241	0.0088808	AAEL013968				GO:0000049,GO:0001510,GO:0003723,GO:0005634,GO:0008033,GO:0008168,GO:0016428,GO:0016740,GO:0030488,GO:0032259	tRNA binding,RNA methylation,RNA binding,nucleus,tRNA processing,methyltransferase activity,tRNA (cytosine-5-)-methyltransferase activity,transferase activity,tRNA methylation,methylation
LOC5568089	2228.19	0.327481	0.0969541	3.37769	0.000730982	0.00896102	AAEL006519				GO:0016020,GO:0016021	membrane,integral component of membrane
LOC5578281	1362.85	0.505002	0.149512	3.37767	0.000731035	0.00896102	AAEL013600	integrin alpha-ps [Source:VB Community Annotation]			GO:0007155,GO:0007229,GO:0008305,GO:0016020,GO:0016021	cell adhesion,integrin-mediated signaling pathway,integrin complex,membrane,integral component of membrane
LOC5579101	476.397	-0.848131	0.251143	-3.37709	0.000732581	0.00897222
LOC5565774	5625.56	0.387331	0.114708	3.37668	0.000733656	0.00897535	AAEL004988	Phosphoglycerate kinase [Source:UniProtKB/TrEMBL;Acc:Q8WQL0]	Pgk		GO:0000166,GO:0004618,GO:0005524,GO:0006096,GO:0016301,GO:0016310,GO:0016740	nucleotide binding,phosphoglycerate kinase activity,ATP binding,glycolytic process,kinase activity,phosphorylation,transferase activity
LOC5571325	1031.9	0.464881	0.137681	3.37652	0.0007341	0.00897535	AAEL008963	tyrosine aminotransferase [Source:VB Community Annotation]			GO:0003824,GO:0004838,GO:0006520,GO:0006559,GO:0006572,GO:0008483,GO:0009058,GO:0009072,GO:0030170	catalytic activity,L-tyrosine:2-oxoglutarate aminotransferase activity,cellular amino acid metabolic process,L-phenylalanine catabolic process,tyrosine catabolic process,transaminase activity,biosynthetic process,aromatic amino acid family metabolic process,pyridoxal phosphate binding
LOC5579901	5011.81	0.500727	0.148371	3.37483	0.000738624	0.00901777	AAEL001052	heat shock protein, putative [Source:VB Community Annotation]			GO:0005524,GO:0005737,GO:0006457	ATP binding,cytoplasm,protein folding
LOC5578768	131.584	-0.715608	0.212048	-3.37475	0.000738839	0.00901777	AAEL020484
LOC5576977	51.2313	1.18089	0.350035	3.37365	0.000741798	0.00903334	AAEL003069
LOC110676375	13.3257	-2.5928	0.768555	-3.37361	0.000741898	0.00903334	AAEL019869
LOC5570661	1586.94	-0.482738	0.143094	-3.37356	0.000742022	0.00903334	AAEL008478
LOC110679049	2115.03	-0.415212	0.123425	-3.3641	0.000767943	0.00933291	AAEL024196
LOC5569724	2115.03	-0.415212	0.123425	-3.3641	0.000767943	0.00933291	AAEL007880	ornithine decarboxylase [Source:VB Community Annotation]			GO:0003824,GO:0006596	catalytic activity,polyamine biosynthetic process
LOC5573267	394.506	-0.43124	0.128256	-3.36233	0.00077289	0.009385
LOC5576626	140.61	0.983615	0.292732	3.36012	0.000779087	0.00945217	AAEL012641				GO:0005576,GO:0006030,GO:0008061	extracellular region,chitin metabolic process,chitin binding
LOC5578062	26.1368	-1.83151	0.545748	-3.35597	0.000790868	0.00958691	AAEL013493	prophenoloxidase [Source:VB Community Annotation]	PPO7		GO:0004497,GO:0016491,GO:0055114	monooxygenase activity,oxidoreductase activity,oxidation-reduction process
LOC5574639	620.194	0.55447	0.16524	3.35555	0.000792062	0.0095932	AAEL011280	voltage-dependent p/q type calcium channel [Source:VB Community Annotation]			GO:0005216,GO:0005244,GO:0005245,GO:0005262,GO:0005891,GO:0006811,GO:0006816,GO:0016020,GO:0016021,GO:0034765,GO:0046872,GO:0055085,GO:0070588	ion channel activity,voltage-gated ion channel activity,voltage-gated calcium channel activity,calcium channel activity,voltage-gated calcium channel complex,ion transport,calcium ion transport,membrane,integral component of membrane,regulation of ion transmembrane transport,metal ion binding,transmembrane transport,calcium ion transmembrane transport
LOC110674836	513.635	-0.520679	0.155211	-3.35466	0.000794634	0.00961615	AAEL020033				GO:0003676	nucleic acid binding
LOC5563966	5773.14	-0.475903	0.141899	-3.3538	0.000797095	0.00963102	AAEL004025	glucose dehydrogenase [Source:VB Community Annotation]			GO:0016614,GO:0050660,GO:0055114	oxidoreductase activity, acting on CH-OH group of donors,flavin adenine dinucleotide binding,oxidation-reduction process
LOC5578926	9603.27	0.429391	0.128033	3.35376	0.000797218	0.00963102	AAEL003746	4-Hydroxybutyrate CoA-transferase, putative [Source:UniProtKB/TrEMBL;Acc:Q0IG02]			GO:0003824,GO:0003986,GO:0006083,GO:0006084,GO:0008775,GO:0019679	catalytic activity,acetyl-CoA hydrolase activity,acetate metabolic process,acetyl-CoA metabolic process,acetate CoA-transferase activity,propionate metabolic process, methylcitrate cycle
LOC23687582	94.7453	0.988683	0.294849	3.35318	0.000798892	0.00964051	AAEL019804				GO:0004930,GO:0007186,GO:0016020,GO:0016021	G protein-coupled receptor activity,G protein-coupled receptor signaling pathway,membrane,integral component of membrane
LOC5576159	418.533	-1.14269	0.340806	-3.35292	0.000799653	0.00964051	AAEL012351	prolylcarboxypeptidase, putative [Source:VB Community Annotation]			GO:0006508,GO:0008236,GO:0016787	proteolysis,serine-type peptidase activity,hydrolase activity
LOC5567347	6.93317	-3.63529	1.08426	-3.35278	0.00080004	0.00964051	AAEL006017
LOC110676379	85.1956	-2.34149	0.698453	-3.35239	0.000801162	0.00964586	AAEL027145				GO:0005615	extracellular space
LOC5570972	12715.9	-0.955311	0.285011	-3.35184	0.000802764	0.00965695	AAEL008699	prolylcarboxypeptidase, putative [Source:VB Community Annotation]			GO:0006508,GO:0008236,GO:0016787	proteolysis,serine-type peptidase activity,hydrolase activity
LOC5566684	4593.05	0.424998	0.126837	3.35075	0.000805943	0.00968156	AAEL005567	nucleosome assembly protein [Source:VB Community Annotation]			GO:0005634,GO:0006334	nucleus,nucleosome assembly
LOC5564046	175.96	0.703489	0.209963	3.35054	0.000806555	0.00968156	AAEL004046				GO:0005267,GO:0006811,GO:0016020,GO:0016021,GO:0071805	potassium channel activity,ion transport,membrane,integral component of membrane,potassium ion transmembrane transport
LOC110676921	79.5435	-1.51409	0.451912	-3.3504	0.000806945	0.00968156	AAEL020875
LOC5575606	337.832	-0.766056	0.22866	-3.3502	0.000807535	0.00968156	AAEL011937	glucosyl/glucuronosyl transferases [Source:VB Community Annotation]			GO:0008194,GO:0016020,GO:0016021,GO:0016740,GO:0016757,GO:0016758	UDP-glycosyltransferase activity,membrane,integral component of membrane,transferase activity,transferase activity, transferring glycosyl groups,transferase activity, transferring hexosyl groups
LOC5569135	2108.07	-0.874172	0.261	-3.34931	0.000810117	0.00970433	AAEL007397	Ecdysone-induced protein 75B isoform A Nuclear receptor [Source:VB Community Annotation]	E75		GO:0003677,GO:0003700,GO:0003707,GO:0004879,GO:0005634,GO:0006355,GO:0008270,GO:0030522,GO:0042025,GO:0043565,GO:0046872	DNA binding,DNA-binding transcription factor activity,steroid hormone receptor activity,nuclear receptor activity,nucleus,regulation of transcription, DNA-templated,zinc ion binding,intracellular receptor signaling pathway,host cell nucleus,sequence-specific DNA binding,metal ion binding
LOC5564260	951.651	-0.39442	0.117795	-3.34834	0.000812958	0.00973016	AAEL019632				GO:0000902	cell morphogenesis
LOC110680489	355.562	-0.475699	0.142104	-3.34754	0.000815333	0.00975036	AAEL024722				GO:0003677,GO:0003700,GO:0005634,GO:0006355	DNA binding,DNA-binding transcription factor activity,nucleus,regulation of transcription, DNA-templated
LOC110678028	32.6602	1.54721	0.462259	3.34707	0.000816708	0.00975859	AAEL025264
LOC5577912	8.63676	-5.51708	1.64925	-3.34521	0.000822213	0.00981611	AAEL003351
LOC5569815	2477.62	0.564523	0.168793	3.34447	0.000824388	0.00983382	AAEL001293
LOC5564204	108.03	0.826702	0.24731	3.34277	0.000829456	0.00988597	AAEL014354	Clip-Domain Serine Protease family B. [Source:VB Community Annotation]	CLIPB43		GO:0004252,GO:0005576,GO:0006508,GO:0008233,GO:0008236,GO:0016787	serine-type endopeptidase activity,extracellular region,proteolysis,peptidase activity,serine-type peptidase activity,hydrolase activity
LOC5574009	1287.95	0.985265	0.294837	3.34173	0.000832587	0.00990667	AAEL010858	AMP dependent ligase [Source:VB Community Annotation]			GO:0003824	catalytic activity
LOC5565203	199.131	-0.661501	0.197952	-3.34173	0.000832587	0.00990667	AAEL004665				GO:0007155,GO:0016020,GO:0016021,GO:0042246	cell adhesion,membrane,integral component of membrane,tissue regeneration
LOC5575868	848.487	-1.12346	0.336372	-3.33992	0.000838013	0.00996288	AAEL019874				GO:0005576	extracellular region
LOC110678315	207.221	-1.72159	0.515789	-3.33777	0.000844525	0.0100319	AAEL025631
LOC5577548	105.352	-0.780742	0.233957	-3.33712	0.000846508	0.0100471	AAEL013258				GO:0005737	cytoplasm
LOC5565683	862.383	0.41518	0.124444	3.33628	0.000849088	0.0100693	AAEL004920				GO:0005515	protein binding
LOC5567708	207.353	0.739593	0.221709	3.33587	0.000850329	0.0100756	AAEL019849				GO:0005515,GO:0035556	protein binding,intracellular signal transduction
LOC110676818	82.8073	-0.945697	0.283544	-3.33527	0.000852157	0.0100888	AAEL010289	beta nu integrin subunit [Source:VB Community Annotation]
LOC5568594	626.814	0.58014	0.173954	3.33501	0.00085295	0.0100898	AAEL001116				GO:0006355	regulation of transcription, DNA-templated
LOC110678323	75.8394	1.14496	0.343429	3.33391	0.000856347	0.0101216	AAEL021462
LOC5565716	318.596	-0.593697	0.178153	-3.33252	0.000860635	0.0101628	AAEL014958	galactokinase [Source:VB Community Annotation]			GO:0000166,GO:0004335,GO:0005524,GO:0005534,GO:0005737,GO:0006012,GO:0016301,GO:0016310,GO:0016740,GO:0016773,GO:0046835	nucleotide binding,galactokinase activity,ATP binding,galactose binding,cytoplasm,galactose metabolic process,kinase activity,phosphorylation,transferase activity,phosphotransferase activity, alcohol group as acceptor,carbohydrate phosphorylation
LOC5576975	1089.97	0.454839	0.136493	3.33232	0.000861265	0.0101628	AAEL003071	tRNA pseudouridine synthase D [Source:VB Community Annotation]			GO:0001522,GO:0003723,GO:0009451,GO:0009982,GO:0016853	pseudouridine synthesis,RNA binding,RNA modification,pseudouridine synthase activity,isomerase activity
LOC5571677	1939.26	-0.689435	0.207008	-3.33047	0.000866981	0.0102217	AAEL001656	sodium-dependent phosphate transporter [Source:VB Community Annotation]			GO:0016020,GO:0016021,GO:0022857,GO:0055085	membrane,integral component of membrane,transmembrane transporter activity,transmembrane transport
LOC110677977	28.435	-1.32949	0.399244	-3.33003	0.000868366	0.0102279	AAEL025759
LOC5570373	158.495	0.739798	0.222177	3.32977	0.000869167	0.0102279	AAEL008259
LOC5578083	261.465	0.831295	0.249667	3.32962	0.000869661	0.0102279	AAEL003413	F-spondin [Source:VB Community Annotation]			GO:0004867,GO:0005576,GO:0007155,GO:0010466,GO:0010951,GO:0030414	serine-type endopeptidase inhibitor activity,extracellular region,cell adhesion,negative regulation of peptidase activity,negative regulation of endopeptidase activity,peptidase inhibitor activity
LOC5567539	433.984	-0.609235	0.183053	-3.3282	0.000874102	0.0102716	AAEL006154				GO:0016020,GO:0016021	membrane,integral component of membrane
LOC5563689	3508.41	0.928161	0.279018	3.32653	0.000879338	0.0103246	AAEL000551				GO:0004866,GO:0004867,GO:0005576,GO:0010466,GO:0010951,GO:0030414	endopeptidase inhibitor activity,serine-type endopeptidase inhibitor activity,extracellular region,negative regulation of peptidase activity,negative regulation of endopeptidase activity,peptidase inhibitor activity
LOC5569592	911.104	0.382593	0.115135	3.323	0.000890542	0.0104475	AAEL001250				GO:0016020,GO:0016021	membrane,integral component of membrane
LOC5570295	1847.92	-0.624206	0.187951	-3.32111	0.000896588	0.0105098	AAEL008232	sugar transporter [Source:VB Community Annotation]			GO:0016020,GO:0016021,GO:0022857,GO:0055085	membrane,integral component of membrane,transmembrane transporter activity,transmembrane transport
LOC110678443	216.269	-0.684658	0.206321	-3.3184	0.00090534	0.0106036	AAEL027700
LOC5573595	515.397	-0.658651	0.19851	-3.31798	0.000906722	0.0106059	AAEL002102				GO:0003756,GO:0005783,GO:0005789,GO:0016020,GO:0016021,GO:0016671,GO:0055114	protein disulfide isomerase activity,endoplasmic reticulum,endoplasmic reticulum membrane,membrane,integral component of membrane,oxidoreductase activity, acting on a sulfur group of donors, disulfide as acceptor,oxidation-reduction process
LOC5577147	1438.44	0.510753	0.15394	3.31788	0.000907026	0.0106059	AAEL022136
LOC110674506	6.34186	4.26939	1.28711	3.31704	0.000909756	0.010629	AAEL024705
LOC5569188	243.837	-0.647127	0.195135	-3.3163	0.000912165	0.0106484	AAEL019609				GO:0003676,GO:0003723,GO:0005515,GO:0035278	nucleic acid binding,RNA binding,protein binding,miRNA mediated inhibition of translation
LOC5572423	81.2857	-0.932897	0.28139	-3.31532	0.000915374	0.0106771	AAEL027040				GO:0007155,GO:0007229,GO:0016020,GO:0016021	cell adhesion,integrin-mediated signaling pathway,membrane,integral component of membrane
LOC5565483	329.256	-1.04794	0.316364	-3.31247	0.000924775	0.0107779	AAEL004821	potassium-dependent sodium-calcium exchanger, putative [Source:VB Community Annotation]			GO:0006816,GO:0015297,GO:0016020,GO:0016021,GO:0055085	calcium ion transport,antiporter activity,membrane,integral component of membrane,transmembrane transport
LOC110675150	3149.43	-0.301107	0.0909325	-3.31132	0.000928575	0.0108133	AAEL020753				GO:0008073	ornithine decarboxylase inhibitor activity
LOC5563953	14.8393	-5.37185	1.62343	-3.30895	0.000936479	0.0108964	AAEL004031				GO:0016020,GO:0016021	membrane,integral component of membrane
LOC5571180	13.0553	-2.55534	0.772767	-3.30675	0.000943861	0.0109734	AAEL008876	deoxyribonuclease I, putative [Source:VB Community Annotation]			GO:0003676,GO:0016787,GO:0046872	nucleic acid binding,hydrolase activity,metal ion binding
LOC5564066	439.324	-0.655436	0.198273	-3.30572	0.00094732	0.0110046	AAEL026169				GO:0046872	metal ion binding
LOC5576390	2570.28	0.508684	0.153904	3.3052	0.000949088	0.0110161	AAEL019513				GO:0005432,GO:0005516,GO:0005886,GO:0006811,GO:0006814,GO:0006816,GO:0007154,GO:0015297,GO:0016020,GO:0016021,GO:0035725,GO:0046872,GO:0055085	calcium:sodium antiporter activity,calmodulin binding,plasma membrane,ion transport,sodium ion transport,calcium ion transport,cell communication,antiporter activity,membrane,integral component of membrane,sodium ion transmembrane transport,metal ion binding,transmembrane transport
LOC5577089	210.567	0.574311	0.173824	3.30398	0.000953242	0.0110553	AAEL012993
LOC5576549	727.207	0.582671	0.176368	3.30373	0.000954092	0.0110561	AAEL019861
LOC5577619	125.24	0.732707	0.221828	3.30304	0.000956425	0.0110741	AAEL003270				GO:0016020,GO:0016021	membrane,integral component of membrane
LOC5575287	1110.72	-0.371146	0.112486	-3.29948	0.000968657	0.0112066	AAEL011750	actin [Source:VB Community Annotation]			GO:0000166,GO:0003779,GO:0005524,GO:0005737,GO:0005856,GO:0005885,GO:0007015,GO:0034314	nucleotide binding,actin binding,ATP binding,cytoplasm,cytoskeleton,Arp2/3 protein complex,actin filament organization,Arp2/3 complex-mediated actin nucleation
LOC5568333	1930.9	-0.35928	0.10891	-3.29887	0.000970761	0.0112166	AAEL021491				GO:0008270	zinc ion binding
LOC5576136	79.1319	-0.882151	0.267418	-3.29877	0.000971102	0.0112166	AAEL024236				GO:0003677,GO:0003700,GO:0006355	DNA binding,DNA-binding transcription factor activity,regulation of transcription, DNA-templated
LOC5579519	1048.96	-0.446034	0.135281	-3.2971	0.00097689	0.0112743	AAEL018280				GO:0016020,GO:0016192	membrane,vesicle-mediated transport
LOC5571601	20.7681	-2.5897	0.785792	-3.29566	0.000981902	0.0113024	AAEL009184				GO:0016020,GO:0016021	membrane,integral component of membrane
LOC5577023	4468.98	0.46881	0.142254	3.29558	0.0009822	0.0113024	AAEL012939	gamma-subunit,methylmalonyl-CoA decarboxylase, putative [Source:VB Community Annotation]
LOC110675179	3.30105	5.23602	1.58892	3.29533	0.000983048	0.0113024	AAEL021237				GO:0003676	nucleic acid binding
LOC110678136	3.28524	5.23032	1.58722	3.29526	0.000983304	0.0113024	AAEL022034				GO:0003676	nucleic acid binding
LOC110680248	3.28524	5.23032	1.58722	3.29526	0.000983304	0.0113024	AAEL024217				GO:0003676	nucleic acid binding
LOC5572713	986.461	-0.671355	0.203787	-3.2944	0.000986338	0.0113281	AAEL023488				GO:0005515	protein binding
LOC5572424	24.059	-2.48197	0.753528	-3.29379	0.000988451	0.0113432	AAEL001814				GO:0016020,GO:0016021,GO:0055114	membrane,integral component of membrane,oxidation-reduction process
LOC5572308	3550.38	-0.425036	0.129059	-3.29334	0.000990046	0.0113524	AAEL009700	beta lactamase domain [Source:VB Community Annotation]
LOC5572617	848.854	0.481097	0.146112	3.29267	0.000992426	0.0113645	AAEL019859				GO:0005515	protein binding
LOC5578200	99.9066	-0.72374	0.219809	-3.29259	0.000992702	0.0113645	AAEL003485	adhesion regulating molecule 1 (110 kda cell membrane glycoprotein) [Source:VB Community Annotation]			GO:0005634,GO:0005737	nucleus,cytoplasm
LOC5569884	301.669	0.466838	0.141828	3.29157	0.000996292	0.0113904	AAEL007969	serine protease [Source:VB Community Annotation]			GO:0004252,GO:0006508	serine-type endopeptidase activity,proteolysis
LOC5566404	604.261	0.627815	0.190739	3.29149	0.000996573	0.0113904	AAEL015151	acid phosphatase [Source:VB Community Annotation]
LOC5565479	111.656	0.935636	0.284323	3.29075	0.000999215	0.0114023	AAEL026975
LOC5569108	111.656	0.935636	0.284323	3.29075	0.000999215	0.0114023	AAEL007381
LOC5566301	2656.87	-0.538499	0.163696	-3.28964	0.00100316	0.0114382	AAEL005293	Galectin [Source:UniProtKB/TrEMBL;Acc:Q16ND5]	GALE8A		GO:0030246	carbohydrate binding
LOC5575017	122.808	0.945888	0.287563	3.28932	0.00100429	0.0114418	AAEL011566	cell adhesion molecule [Source:VB Community Annotation]			GO:0005509	calcium ion binding
LOC5569890	18.8083	1.8283	0.556272	3.2867	0.0010137	0.0115398	AAEL007993	Clip-Domain Serine Protease family B. [Source:VB Community Annotation]	CLIPB27		GO:0004252,GO:0005576,GO:0006508,GO:0008233,GO:0008236,GO:0016787	serine-type endopeptidase activity,extracellular region,proteolysis,peptidase activity,serine-type peptidase activity,hydrolase activity
LOC5577519	76.5872	-0.841227	0.256032	-3.28564	0.00101751	0.0115739	AAEL021813
LOC5567305	121.138	-0.692988	0.210968	-3.28481	0.00102052	0.0115988	AAEL005956	caspase (short) [Source:VB Community Annotation]	CASPS16		GO:0004197,GO:0006508,GO:0006915,GO:0008234	cysteine-type endopeptidase activity,proteolysis,apoptotic process,cysteine-type peptidase activity
LOC5577660	522.305	0.767873	0.233894	3.28299	0.00102711	0.0116644	AAEL003243	Clip-Domain Serine Protease family B. [Source:VB Community Annotation]	CLIPB13A		GO:0004252,GO:0005576,GO:0006508,GO:0008233,GO:0008236,GO:0016787	serine-type endopeptidase activity,extracellular region,proteolysis,peptidase activity,serine-type peptidase activity,hydrolase activity
LOC5564851	210.475	-0.62034	0.189074	-3.28093	0.00103465	0.0117406	AAEL000604
LOC5566102	4115.47	-0.684122	0.208597	-3.27964	0.00103941	0.0117852	AAEL015070	alkaline phosphatase [Source:VB Community Annotation]	mALP		GO:0003824,GO:0004035,GO:0016311,GO:0016791,GO:0031225	catalytic activity,alkaline phosphatase activity,dephosphorylation,phosphatase activity,anchored component of membrane
LOC5577632	642.3	0.48865	0.149069	3.278	0.00104545	0.0118442	AAEL019575				GO:0007165,GO:0008083	signal transduction,growth factor activity
LOC5572815	25.3734	1.52537	0.4654	3.27755	0.00104712	0.0118445	AAEL001897				GO:0030246	carbohydrate binding
LOC5568319	1102	0.369241	0.112658	3.27755	0.00104713	0.0118445	AAEL006727	multisynthetase complex, auxiliary protein, p38, putative [Source:VB Community Annotation]			GO:0005634,GO:0005829,GO:0017101	nucleus,cytosol,aminoacyl-tRNA synthetase multienzyme complex
LOC5573490	3997.33	-0.559091	0.170627	-3.27668	0.00105034	0.0118713	AAEL010540	alpha-amylase [Source:VB Community Annotation]			GO:0003824,GO:0005975,GO:0008152,GO:0016798	catalytic activity,carbohydrate metabolic process,metabolic process,hydrolase activity, acting on glycosyl bonds
LOC5566330	8757.52	0.57492	0.17558	3.27441	0.00105882	0.0119507	AAEL020452				GO:0005515	protein binding
LOC5578729	2423.76	0.324996	0.0992552	3.27435	0.00105905	0.0119507	AAEL013844	diazepam binding inhibitor, putative [Source:VB Community Annotation]			GO:0000062	fatty-acyl-CoA binding
LOC5571650	183.151	0.872753	0.266677	3.2727	0.00106524	0.0120023	AAEL001632	multicopper oxidase [Source:VB Community Annotation]			GO:0005507,GO:0016491,GO:0046872,GO:0055114	copper ion binding,oxidoreductase activity,metal ion binding,oxidation-reduction process
LOC5576263	689.588	-0.625845	0.191233	-3.27268	0.00106531	0.0120023	AAEL019444				GO:0003723	RNA binding
LOC5571172	1424.73	0.395511	0.120862	3.27241	0.00106635	0.0120044	AAEL008862				GO:0003824,GO:0006508,GO:0046872	catalytic activity,proteolysis,metal ion binding
LOC5567253	284.168	0.488691	0.149364	3.2718	0.00106864	0.0120208	AAEL005926	ER lumen protein retaining receptor [Source:VB Community Annotation]			GO:0005783,GO:0005789,GO:0006621,GO:0015031,GO:0016020,GO:0016021,GO:0046923	endoplasmic reticulum,endoplasmic reticulum membrane,protein retention in ER lumen,protein transport,membrane,integral component of membrane,ER retention sequence binding
LOC5577511	28.2145	-1.69843	0.519382	-3.27009	0.00107513	0.0120842	AAEL003195	Carboxy/choline esterase Alpha Esterase [Source:VB Community Annotation]	CCEAE1C		GO:0016787,GO:0052689	hydrolase activity,carboxylic ester hydrolase activity
LOC5569731	471.958	0.423601	0.129597	3.2686	0.00108079	0.0121382	AAEL007889	F-spondin [Source:VB Community Annotation]			GO:0004867,GO:0005576,GO:0007155,GO:0010466,GO:0010951,GO:0016020,GO:0016021,GO:0030414	serine-type endopeptidase inhibitor activity,extracellular region,cell adhesion,negative regulation of peptidase activity,negative regulation of endopeptidase activity,membrane,integral component of membrane,peptidase inhibitor activity
LOC5580003	69.4532	-0.893269	0.273381	-3.26749	0.00108507	0.0121766	AAEL009639	Ubiquitin-like protein [Source:UniProtKB/TrEMBL;Acc:A0A1S4FN23]			GO:0005515,GO:0005886,GO:0016020	protein binding,plasma membrane,membrane
LOC5576798	1643.97	-0.511365	0.156624	-3.26492	0.00109496	0.0122728	AAEL012774	protease m1 zinc metalloprotease [Source:VB Community Annotation]			GO:0004177,GO:0006508,GO:0008233,GO:0008237,GO:0008270,GO:0016787,GO:0046872	aminopeptidase activity,proteolysis,peptidase activity,metallopeptidase activity,zinc ion binding,hydrolase activity,metal ion binding
LOC110678671	5.26283	-4.76205	1.4586	-3.26481	0.00109537	0.0122728	AAEL020169
LOC5576703	31.0326	-1.45316	0.445334	-3.26309	0.00110204	0.0123379	AAEL011791
LOC110676281	499.888	1.18268	0.362819	3.2597	0.00111531	0.0124765	AAEL023370
LOC5576111	326.149	0.5176	0.158944	3.25649	0.00112801	0.0125968	AAEL002784	zinc finger protein [Source:VB Community Annotation]			GO:0008270,GO:0046872	zinc ion binding,metal ion binding
LOC5574864	1070.22	-0.455345	0.139834	-3.25632	0.00112866	0.0125968	AAEL011465				GO:0016020,GO:0016021	membrane,integral component of membrane
LOC5579816	212.705	-0.766401	0.235359	-3.25631	0.00112872	0.0125968	AAEL018059				GO:0000166,GO:0004672,GO:0004674,GO:0005524,GO:0005737,GO:0005886,GO:0006468,GO:0016020,GO:0016301,GO:0016310,GO:0016740,GO:0017048,GO:0035556	nucleotide binding,protein kinase activity,protein serine/threonine kinase activity,ATP binding,cytoplasm,plasma membrane,protein phosphorylation,membrane,kinase activity,phosphorylation,transferase activity,Rho GTPase binding,intracellular signal transduction
LOC23687409	54.591	-1.12421	0.345413	-3.25467	0.00113524	0.0126596	AAEL016989
LOC5577614	53.6949	-1.2251	0.376462	-3.25425	0.00113692	0.0126684	AAEL003269				GO:0042302	structural constituent of cuticle
LOC5574240	137.5	0.644064	0.197938	3.25387	0.00113845	0.0126755	AAEL011007	fibrinogen and fibronectin [Source:VB Community Annotation]
LOC5569259	81.2917	-1.72301	0.5296	-3.25342	0.00114024	0.0126855	AAEL007519	oviductin [Source:VB Community Annotation]			GO:0004252,GO:0006508,GO:0008233,GO:0008236,GO:0016787	serine-type endopeptidase activity,proteolysis,peptidase activity,serine-type peptidase activity,hydrolase activity
LOC5571602	139.499	-3.65626	1.12398	-3.25295	0.00114215	0.0126968	AAEL009186				GO:0016020,GO:0016021	membrane,integral component of membrane
LOC5563726	327.66	0.613438	0.188675	3.25129	0.00114881	0.0127608	AAEL014079	serine protease inhibitor, serpin [Source:VB Community Annotation]			GO:0004867,GO:0005615,GO:0010466,GO:0010951,GO:0030414	serine-type endopeptidase inhibitor activity,extracellular space,negative regulation of peptidase activity,negative regulation of endopeptidase activity,peptidase inhibitor activity
LOC110675094	6.54509	3.24451	0.998113	3.25064	0.00115145	0.0127802	AAEL027725
LOC110680282	34.4085	-1.32236	0.407	-3.24905	0.00115791	0.0128419	AAEL028017
LOC5568141	75163.1	0.345852	0.106469	3.24839	0.00116061	0.0128618	AAEL006582	calcium-transporting ATPase sarcoplasmic/endoplasmic reticulum type [Source:VB Community Annotation]			GO:0000166,GO:0005388,GO:0005524,GO:0005783,GO:0006811,GO:0006816,GO:0016020,GO:0016021,GO:0016529,GO:0033017,GO:0046872,GO:0070588	nucleotide binding,calcium transmembrane transporter activity, phosphorylative mechanism,ATP binding,endoplasmic reticulum,ion transport,calcium ion transport,membrane,integral component of membrane,sarcoplasmic reticulum,sarcoplasmic reticulum membrane,metal ion binding,calcium ion transmembrane transport
LOC110674098	1239.94	-4.30463	1.32633	-3.24551	0.00117242	0.0129779	AAEL023292
LOC5563810	622.58	-0.662729	0.204207	-3.24539	0.00117292	0.0129779	AAEL014144	rapsynoid [Source:VB Community Annotation]			GO:0005515	protein binding
LOC110679350	66.2791	-0.844229	0.260158	-3.24506	0.00117424	0.0129824	AAEL020180
LOC5575034	25.5534	1.33181	0.410474	3.24457	0.00117627	0.0129948	AAEL011582				GO:0003723,GO:0005737,GO:0006417,GO:0008270,GO:0046872	RNA binding,cytoplasm,regulation of translation,zinc ion binding,metal ion binding
LOC5575148	285.431	-0.710926	0.219418	-3.24006	0.00119506	0.0131921	AAEL000334	villin [Source:VB Community Annotation]			GO:0003779,GO:0007010,GO:0007015,GO:0007300,GO:0051015	actin binding,cytoskeleton organization,actin filament organization,ovarian nurse cell to oocyte transport,actin filament binding
LOC110675216	257.537	0.821452	0.25359	3.23929	0.00119828	0.0132174	AAEL024000				GO:0005549	odorant binding
LOC110675701	33.8832	-1.43182	0.442078	-3.23884	0.00120018	0.013228	AAEL023405
LOC5576642	13980	-0.259394	0.0801712	-3.2355	0.0012143	0.0133732	AAEL012671				GO:0003700,GO:0006355	DNA-binding transcription factor activity,regulation of transcription, DNA-templated
LOC110679681	163.235	-7.81649	2.41633	-3.23486	0.00121704	0.0133827	AAEL019655
LOC5567174	163.235	-7.81649	2.41633	-3.23486	0.00121704	0.0133827	AAEL022799
LOC5576430	111.768	0.701106	0.216821	3.23357	0.00122253	0.0134327	AAEL012520	Nop2p, putative [Source:VB Community Annotation]			GO:0001510,GO:0003723,GO:0008168,GO:0016740,GO:0032259	RNA methylation,RNA binding,methyltransferase activity,transferase activity,methylation
LOC5569333	13178.6	0.448529	0.138722	3.23329	0.00122373	0.0134355	AAEL007555	acyl-coa dehydrogenase [Source:VB Community Annotation]			GO:0003995,GO:0016491,GO:0016627,GO:0050660,GO:0055114	acyl-CoA dehydrogenase activity,oxidoreductase activity,oxidoreductase activity, acting on the CH-CH group of donors,flavin adenine dinucleotide binding,oxidation-reduction process
LOC5568754	128.689	0.671916	0.207902	3.23189	0.00122974	0.0134911	AAEL007104	voltage-gated potassium channel [Source:VB Community Annotation]			GO:0005216,GO:0005244,GO:0005249,GO:0005267,GO:0005515,GO:0006811,GO:0006813,GO:0008076,GO:0016020,GO:0016021,GO:0030425,GO:0034765,GO:0042995,GO:0051260,GO:0055085,GO:0071805	ion channel activity,voltage-gated ion channel activity,voltage-gated potassium channel activity,potassium channel activity,protein binding,ion transport,potassium ion transport,voltage-gated potassium channel complex,membrane,integral component of membrane,dendrite,regulation of ion transmembrane transport,cell projection,protein homooligomerization,transmembrane transport,potassium ion transmem…
LOC110675403	107.989	-0.794093	0.245752	-3.23127	0.0012324	0.0135098	AAEL026415				GO:0017121,GO:0017128	plasma membrane phospholipid scrambling,phospholipid scramblase activity
LOC5564930	3450.07	-0.728604	0.22559	-3.22977	0.00123888	0.0135704	AAEL004505	serine collagenase 1 precursor, putative [Source:VB Community Annotation]			GO:0004252,GO:0006508	serine-type endopeptidase activity,proteolysis
LOC5575706	15772.6	0.483528	0.149735	3.22923	0.00124125	0.0135859	AAEL012014	L-lactate dehydrogenase [Source:UniProtKB/TrEMBL;Acc:Q16ND1]			GO:0003824,GO:0004459,GO:0005737,GO:0005975,GO:0016491,GO:0016616,GO:0019752,GO:0055114	catalytic activity,L-lactate dehydrogenase activity,cytoplasm,carbohydrate metabolic process,oxidoreductase activity,oxidoreductase activity, acting on the CH-OH group of donors, NAD or NADP as acceptor,carboxylic acid metabolic process,oxidation-reduction process
LOC110680993	1512.51	0.430381	0.133303	3.2286	0.00124397	0.0136052	AAEL024747
LOC5565734	1946.16	0.658837	0.204245	3.22571	0.00125661	0.0137328	AAEL018040				GO:0000166,GO:0005524,GO:0016020,GO:0016021,GO:0016887,GO:0042626,GO:0055085	nucleotide binding,ATP binding,membrane,integral component of membrane,ATPase activity,ATPase-coupled transmembrane transporter activity,transmembrane transport
LOC5578763	402.935	0.514795	0.159694	3.22364	0.00126572	0.0138217	AAEL003704	39S ribosomal protein L13, mitochondrial [Source:UniProtKB/TrEMBL;Acc:Q17ET7]	mRpL13		GO:0003735,GO:0005840,GO:0006412	structural constituent of ribosome,ribosome,translation
LOC23687552	113.7	-0.788145	0.2446	-3.22218	0.0012722	0.0138819	AAEL017132	C-Type Lysozyme (Lys-C). [Source:VB Community Annotation]	LYSC4		GO:0003796	lysozyme activity
LOC5567129	2331.19	-0.359147	0.111477	-3.22171	0.00127427	0.0138937	AAEL005884
LOC110675600	3.33265	5.24771	1.62901	3.22141	0.00127563	0.0138979	AAEL021818
LOC5565537	525.005	-0.537549	0.166894	-3.2209	0.00127791	0.013902	AAEL004853	glycerol kinase [Source:VB Community Annotation]			GO:0000166,GO:0004370,GO:0005524,GO:0005975,GO:0006071,GO:0006072,GO:0016301,GO:0016310,GO:0016740,GO:0016773,GO:0019563	nucleotide binding,glycerol kinase activity,ATP binding,carbohydrate metabolic process,glycerol metabolic process,glycerol-3-phosphate metabolic process,kinase activity,phosphorylation,transferase activity,phosphotransferase activity, alcohol group as acceptor,glycerol catabolic process
LOC5573878	370.116	-0.720581	0.223722	-3.22088	0.00127796	0.013902	AAEL010799				GO:0007155,GO:0016020,GO:0016021,GO:0042246	cell adhesion,membrane,integral component of membrane,tissue regeneration
LOC110676357	379.398	0.803352	0.249463	3.22032	0.00128047	0.0139186	AAEL021823
LOC5569597	185.989	-1.07628	0.334272	-3.21977	0.00128293	0.0139347	AAEL001257	sugar transporter [Source:VB Community Annotation]			GO:0016020,GO:0016021,GO:0022857,GO:0055085	membrane,integral component of membrane,transmembrane transporter activity,transmembrane transport
LOC5575604	1400.69	0.407875	0.126706	3.21906	0.00128613	0.0139587	AAEL011934	glutathione transferase [Source:VB Community Annotation]	GSTZ1		GO:0003824,GO:0005515,GO:0005737,GO:0006559,GO:0006572,GO:0009072,GO:0016034,GO:0016853	catalytic activity,protein binding,cytoplasm,L-phenylalanine catabolic process,tyrosine catabolic process,aromatic amino acid family metabolic process,maleylacetoacetate isomerase activity,isomerase activity
LOC5572148	237.578	0.513774	0.159683	3.21747	0.00129327	0.0140202	AAEL009569	apolipoprotein D, putative [Source:VB Community Annotation]
LOC5568890	598.601	0.544185	0.169142	3.21732	0.00129395	0.0140202	AAEL007197	amino acid transporter [Source:VB Community Annotation]			GO:0016020,GO:0016021	membrane,integral component of membrane
LOC5567935	132.801	-0.803168	0.249653	-3.21714	0.00129475	0.0140202	AAEL019515				GO:0005515,GO:0008191,GO:1904684	protein binding,metalloendopeptidase inhibitor activity,negative regulation of metalloendopeptidase activity
LOC5578285	169.641	-4.56521	1.41941	-3.21628	0.00129862	0.0140514	AAEL013606
LOC5573380	271.622	-1.22546	0.381058	-3.21595	0.00130013	0.0140571	AAEL010469
LOC5570668	223.256	-0.526024	0.163624	-3.21484	0.00130516	0.0141006	AAEL008480
LOC110677717	840.412	-0.577724	0.179815	-3.21289	0.00131408	0.0141863	AAEL019829				GO:0006508,GO:0008233,GO:0008237,GO:0008270,GO:0016787,GO:0046872	proteolysis,peptidase activity,metallopeptidase activity,zinc ion binding,hydrolase activity,metal ion binding
LOC5569501	1163.5	-0.383331	0.119349	-3.21185	0.00131885	0.014227	AAEL007691	organic anion transporter [Source:VB Community Annotation]			GO:0005215,GO:0005515,GO:0005886,GO:0006811,GO:0016020,GO:0016021,GO:0055085	transporter activity,protein binding,plasma membrane,ion transport,membrane,integral component of membrane,transmembrane transport
LOC110676126	1045.96	-0.343011	0.106836	-3.21062	0.00132447	0.0142768	AAEL026075
LOC5568426	97.7071	1.47811	0.460612	3.20902	0.00133187	0.0143456	AAEL006834	glutamate semialdehyde dehydrogenase [Source:VB Community Annotation]			GO:0000166,GO:0003824,GO:0004349,GO:0004350,GO:0005524,GO:0005737,GO:0005739,GO:0006561,GO:0008152,GO:0008652,GO:0016301,GO:0016310,GO:0016491,GO:0016620,GO:0016740,GO:0050661,GO:0055114,GO:0055129	nucleotide binding,catalytic activity,glutamate 5-kinase activity,glutamate-5-semialdehyde dehydrogenase activity,ATP binding,cytoplasm,mitochondrion,proline biosynthetic process,metabolic process,cellular amino acid biosynthetic process,kinase activity,phosphorylation,oxidoreductase activity,oxidoreductase activity, acting on the aldehyde or oxo group of donors, NAD or NADP as acceptor,transfera…
LOC110675608	14.3404	-2.07936	0.648208	-3.20786	0.00133726	0.0143928	AAEL024460
LOC5569684	1103.34	-0.532053	0.165919	-3.2067	0.00134267	0.0144401	AAEL007830	cytochrome P450 [Source:VB Community Annotation]	CYP4H29		GO:0004497,GO:0005506,GO:0016491,GO:0016705,GO:0020037,GO:0046872,GO:0055114	monooxygenase activity,iron ion binding,oxidoreductase activity,oxidoreductase activity, acting on paired donors, with incorporation or reduction of molecular oxygen,heme binding,metal ion binding,oxidation-reduction process
LOC110680266	324.608	-0.79578	0.248211	-3.20606	0.00134567	0.0144614	AAEL023653
LOC5575767	33.8401	1.28918	0.402522	3.20276	0.00136117	0.0146169	AAEL002731	Serine Protease Inhibitor (serpin) homologue - unlikely to be inhibitory. [Source:VB Community Annotation]	SRPN14		GO:0004867,GO:0005615,GO:0010466,GO:0010951,GO:0030414	serine-type endopeptidase inhibitor activity,extracellular space,negative regulation of peptidase activity,negative regulation of endopeptidase activity,peptidase inhibitor activity
LOC5564181	467.115	-0.515395	0.16099	-3.20141	0.00136756	0.0146665	AAEL004131	gh regulated tbc protein-1 [Source:VB Community Annotation]
LOC5563631	140.413	-1.95183	0.609709	-3.20124	0.00136836	0.0146665	AAEL000098				GO:0016020,GO:0016021	membrane,integral component of membrane
LOC5573308	63.9105	1.59874	0.499429	3.20113	0.00136889	0.0146665	AAEL010396	secreted ferritin G subunit precursor, putative [Source:VB Community Annotation]			GO:0004322,GO:0005623,GO:0006826,GO:0006879,GO:0008199,GO:0016491,GO:0046872,GO:0055114	ferroxidase activity,obsolete cell,iron ion transport,cellular iron ion homeostasis,ferric iron binding,oxidoreductase activity,metal ion binding,oxidation-reduction process
LOC5572228	466.074	-0.417802	0.130589	-3.19938	0.00137724	0.0147448	AAEL025268				GO:0003676,GO:0003723,GO:0005634,GO:0006397	nucleic acid binding,RNA binding,nucleus,mRNA processing
LOC5578028	73.7224	2.0282	0.634104	3.19853	0.00138131	0.0147773	AAEL003389	attacin anti-microbial peptide [Source:VB Community Annotation]	ATT		GO:0005576,GO:0005615,GO:0019731,GO:0042742,GO:0045087	extracellular region,extracellular space,antibacterial humoral response,defense response to bacterium,innate immune response
LOC110679407	5.30146	-4.78089	1.49519	-3.19752	0.00138614	0.0148179	AAEL026477
LOC5567672	48.5504	1.22936	0.384594	3.19651	0.00139102	0.0148588	AAEL019564				GO:0004252,GO:0006508	serine-type endopeptidase activity,proteolysis
LOC5577913	39.9925	-5.49109	1.71798	-3.19625	0.00139226	0.0148609	AAEL003358
LOC5564206	314.813	-2.65334	0.830228	-3.19592	0.00139386	0.0148668	AAEL014357
LOC110675357	5.92966	-4.02346	1.25904	-3.19565	0.00139517	0.0148697	AAEL024970
LOC5579951	596.626	-0.383541	0.120045	-3.19497	0.00139845	0.0148934	AAEL006786	GTPase_rho [Source:VB Community Annotation]			GO:0003924,GO:0005525,GO:0007264	GTPase activity,GTP binding,small GTPase mediated signal transduction
LOC5563558	126.24	0.684702	0.214363	3.19413	0.00140254	0.0149258	AAEL022948				GO:0004016,GO:0005524,GO:0005886,GO:0006171,GO:0009190,GO:0016020,GO:0016829,GO:0016849,GO:0035556,GO:0046872	adenylate cyclase activity,ATP binding,plasma membrane,cAMP biosynthetic process,cyclic nucleotide biosynthetic process,membrane,lyase activity,phosphorus-oxygen lyase activity,intracellular signal transduction,metal ion binding
LOC5564563	383.23	-0.530552	0.166116	-3.19386	0.00140386	0.0149286	AAEL014510	Sprouty [Source:UniProtKB/TrEMBL;Acc:A0A1S4G215]			GO:0007275,GO:0009966,GO:0016020	multicellular organism development,regulation of signal transduction,membrane
LOC110676362	12.4918	-2.1672	0.679192	-3.19086	0.0014185	0.0150618	AAEL003079	glucosyl/glucuronosyl transferases [Source:VB Community Annotation]			GO:0016758	transferase activity, transferring hexosyl groups
LOC5576969	12.4918	-2.1672	0.679192	-3.19086	0.0014185	0.0150618	AAEL021590				GO:0008194,GO:0015020,GO:0016020,GO:0016021,GO:0016740,GO:0016757,GO:0016758	UDP-glycosyltransferase activity,glucuronosyltransferase activity,membrane,integral component of membrane,transferase activity,transferase activity, transferring glycosyl groups,transferase activity, transferring hexosyl groups
LOC5577385	349.501	0.491581	0.154082	3.19039	0.00142081	0.015075	AAEL000467	mitochondrial ribosomal protein, L49, putative [Source:VB Community Annotation]	mRpL49		GO:0003735,GO:0005739,GO:0005840,GO:0006412	structural constituent of ribosome,mitochondrion,ribosome,translation
LOC5563640	635.495	-3.77758	1.18545	-3.18661	0.0014395	0.0152619	AAEL000085	pupal cuticle protein, putative [Source:VB Community Annotation]
LOC23687786	2111.9	-0.486679	0.152772	-3.18566	0.00144425	0.0153009	AAEL017366				GO:0005506,GO:0016705,GO:0020037,GO:0055114	iron ion binding,oxidoreductase activity, acting on paired donors, with incorporation or reduction of molecular oxygen,heme binding,oxidation-reduction process
LOC5571600	34.5663	1.30444	0.409568	3.18491	0.00144799	0.015329	AAEL009181	Uncharacterized protein AEGI23 [Source:UniProtKB/TrEMBL;Acc:Q8STC4]
LOC110681514	1218.16	0.371249	0.11658	3.18451	0.00144999	0.0153388	AAEL026867				GO:0003677	DNA binding
LOC5571961	42.3365	-1.14803	0.361167	-3.17867	0.00147952	0.0156338	AAEL012369
LOC5576144	171.018	-1.23917	0.389851	-3.17856	0.00148008	0.0156338	AAEL012344	lipase 1 precursor [Source:VB Community Annotation]			GO:0016042,GO:0016787,GO:0016788	lipid catabolic process,hydrolase activity,hydrolase activity, acting on ester bonds
LOC5567663	205.96	0.81234	0.255649	3.17756	0.00148517	0.015676	AAEL006248	p37NB protein, putative [Source:VB Community Annotation]			GO:0005515	protein binding
LOC5578287	91.338	1.41477	0.445351	3.17674	0.00148938	0.0157087	AAEL013605				GO:0005515	protein binding
LOC5575941	492.081	0.487183	0.153377	3.17638	0.00149123	0.0157166	AAEL012185	ribosome biogenesis regulatory protein [Source:VB Community Annotation]			GO:0005634,GO:0042254	nucleus,ribosome biogenesis
LOC110678542	34.8545	1.17822	0.371102	3.17492	0.00149877	0.0157843	AAEL027558
LOC5568609	336.172	0.675893	0.212979	3.17353	0.001506	0.0158487	AAEL006978	protein-glutamine gamma-glutamyltransferase [Source:VB Community Annotation]			GO:0003810,GO:0018149,GO:0046872	protein-glutamine gamma-glutamyltransferase activity,peptide cross-linking,metal ion binding
LOC5563768	210.595	-0.529025	0.166779	-3.17201	0.00151389	0.0159199	AAEL019626				GO:0004672,GO:0005524,GO:0006468	protein kinase activity,ATP binding,protein phosphorylation
LOC5573624	179.932	-0.545438	0.172035	-3.1705	0.00152176	0.0159909	AAEL010607				GO:0001004,GO:0005515,GO:0006383	obsolete RNA polymerase III transcription regulator recruiting activity,protein binding,transcription by RNA polymerase III
LOC5579928	212.416	-0.786643	0.248283	-3.16833	0.00153318	0.016094	AAEL006784	cytochrome P450 [Source:VB Community Annotation]	CYP9J17		GO:0004497,GO:0005506,GO:0016020,GO:0016021,GO:0016491,GO:0016705,GO:0020037,GO:0046872,GO:0055114	monooxygenase activity,iron ion binding,membrane,integral component of membrane,oxidoreductase activity,oxidoreductase activity, acting on paired donors, with incorporation or reduction of molecular oxygen,heme binding,metal ion binding,oxidation-reduction process
LOC5578793	475.751	0.412388	0.130165	3.1682	0.00153384	0.016094	AAEL003676	myosin I homologue, putative [Source:VB Community Annotation]			GO:0003676	nucleic acid binding
LOC5568410	10.7032	-2.76743	0.873756	-3.16728	0.00153873	0.0161334	AAEL006818	glutathione S-transferase, putative [Source:VB Community Annotation]			GO:0016020,GO:0016021	membrane,integral component of membrane
LOC5578696	421.712	-0.428438	0.135301	-3.16656	0.00154252	0.0161612	AAEL025569
LOC110679588	25.6312	-1.48682	0.469988	-3.16352	0.00155872	0.0163188	AAEL011125
LOC5573073	1988.09	-0.588139	0.185961	-3.1627	0.00156311	0.0163528	AAEL010264
LOC5568636	183.494	-0.582076	0.184132	-3.16118	0.00157131	0.0164265	AAEL006990				GO:0006644,GO:0008195,GO:0016020,GO:0016021,GO:0016311	phospholipid metabolic process,phosphatidate phosphatase activity,membrane,integral component of membrane,dephosphorylation
LOC5566067	332.947	-0.781886	0.247413	-3.16024	0.00157639	0.0164675	AAEL023653				GO:0003824,GO:0008484,GO:0016020,GO:0016021,GO:0016787	catalytic activity,sulfuric ester hydrolase activity,membrane,integral component of membrane,hydrolase activity
LOC5576765	4110.71	0.345009	0.109201	3.15939	0.00158099	0.0165034	AAEL012746	chaperonin [Source:VB Community Annotation]			GO:0000166,GO:0005524,GO:0005737,GO:0006457,GO:0051082	nucleotide binding,ATP binding,cytoplasm,protein folding,unfolded protein binding
LOC5571819	79.2066	-1.1691	0.370255	-3.15756	0.00159097	0.0165954	AAEL001687	adenylate cyclase [Source:VB Community Annotation]			GO:0016020,GO:0016021,GO:0022857,GO:0055085	membrane,integral component of membrane,transmembrane transporter activity,transmembrane transport
LOC110681515	100.204	-1.11337	0.352698	-3.15672	0.00159556	0.016631	AAEL025040
LOC5564878	12159.8	0.588519	0.186475	3.15602	0.00159938	0.0166587	AAEL004457	cytochrome c [Source:VB Community Annotation]			GO:0005739,GO:0005758,GO:0009055,GO:0020037,GO:0022900,GO:0046872,GO:0055114,GO:0070469	mitochondrion,mitochondrial intermembrane space,electron transfer activity,heme binding,electron transport chain,metal ion binding,oxidation-reduction process,respirasome
LOC5577080	1284.19	0.422268	0.133809	3.15574	0.00160089	0.0166622	AAEL012980	Pescadillo homolog [Source:VB Community Annotation]			GO:0000463,GO:0000466,GO:0005634,GO:0005654,GO:0005730,GO:0006364,GO:0030687,GO:0042254,GO:0042273,GO:0043021	maturation of LSU-rRNA from tricistronic rRNA transcript (SSU-rRNA, 5.8S rRNA, LSU-rRNA),maturation of 5.8S rRNA from tricistronic rRNA transcript (SSU-rRNA, 5.8S rRNA, LSU-rRNA),nucleus,nucleoplasm,nucleolus,rRNA processing,preribosome, large subunit precursor,ribosome biogenesis,ribosomal large subunit biogenesis,ribonucleoprotein complex binding
LOC5576118	1883.19	-0.625174	0.198174	-3.15466	0.00160683	0.0167117	AAEL002817				GO:0005515	protein binding
LOC5572042	256.198	-0.739082	0.234318	-3.15418	0.00160951	0.0167189	AAEL000246	GPCR Frizzled/Smoothened Family [Source:VB Community Annotation]	GPRSTN		GO:0004888,GO:0004930,GO:0005509,GO:0005886,GO:0007155,GO:0007156,GO:0007166,GO:0007186,GO:0007275,GO:0016020,GO:0016021	transmembrane signaling receptor activity,G protein-coupled receptor activity,calcium ion binding,plasma membrane,cell adhesion,homophilic cell adhesion via plasma membrane adhesion molecules,cell surface receptor signaling pathway,G protein-coupled receptor signaling pathway,multicellular organism development,membrane,integral component of membrane
LOC5573064	197.558	0.580375	0.184006	3.15411	0.00160988	0.0167189	AAEL021114				GO:0004190,GO:0006508,GO:0016020,GO:0016021,GO:0022857,GO:0055085	aspartic-type endopeptidase activity,proteolysis,membrane,integral component of membrane,transmembrane transporter activity,transmembrane transport
LOC5568054	2569.69	0.498358	0.15808	3.15257	0.00161841	0.0167953	AAEL006480
LOC5580230	651.076	-0.447148	0.141928	-3.15053	0.00162976	0.0169007	AAEL012206	microtubule-associated protein tau [Source:VB Community Annotation]			GO:0005737,GO:0005856,GO:0005874,GO:0008017,GO:0015631	cytoplasm,cytoskeleton,microtubule,microtubule binding,tubulin binding
LOC5570092	8.29263	-3.09767	0.984123	-3.14764	0.00164593	0.0170559	AAEL001333	protein arginine n-methyltransferase 1, [Source:VB Community Annotation]			GO:0006479,GO:0008168,GO:0016274,GO:0016740,GO:0018216,GO:0032259,GO:0035246	protein methylation,methyltransferase activity,protein-arginine N-methyltransferase activity,transferase activity,peptidyl-arginine methylation,methylation,peptidyl-arginine N-methylation
LOC5570622	32.3825	1.80883	0.574794	3.14693	0.00164995	0.0170852	AAEL008428				GO:0005509	calcium ion binding
LOC5565521	2105.71	0.465743	0.148027	3.14633	0.00165333	0.0171077	AAEL025091				GO:0016020,GO:0016021,GO:0035556	membrane,integral component of membrane,intracellular signal transduction
LOC5578667	27.292	-1.36706	0.434576	-3.14574	0.00165669	0.01713	AAEL003641	sodium/chloride dependent amino acid transporter [Source:VB Community Annotation]			GO:0005328,GO:0015293,GO:0016020,GO:0016021,GO:0055085	,symporter activity,membrane,integral component of membrane,transmembrane transport
LOC110679833	28.7023	-1.63282	0.519096	-3.1455	0.00165801	0.0171312	AAEL023346				GO:0016787,GO:0052689	hydrolase activity,carboxylic ester hydrolase activity
LOC110676720	6.18522	-4.07671	1.29619	-3.14516	0.00165997	0.0171389	AAEL021363
LOC5568968	151.373	-0.665677	0.211774	-3.14334	0.00167031	0.0172332	AAEL007268				GO:0005515	protein binding
LOC5578739	478.47	-2.41234	0.767941	-3.1413	0.00168199	0.0173411	AAEL003653	Serine Protease Inhibitor (serpin) homologue - unlikely to be inhibitory. [Source:VB Community Annotation]	SRPN12		GO:0004867,GO:0005615,GO:0010466,GO:0010951,GO:0030414	serine-type endopeptidase inhibitor activity,extracellular space,negative regulation of peptidase activity,negative regulation of endopeptidase activity,peptidase inhibitor activity
LOC110679200	53.1122	1.07423	0.342149	3.13965	0.0016915	0.0174265	AAEL023353
LOC5567972	1542.32	0.298358	0.0950545	3.13881	0.00169636	0.0174639	AAEL006415	leucyl-tRNA synthetase [Source:VB Community Annotation]			GO:0000166,GO:0002161,GO:0004812,GO:0004823,GO:0005524,GO:0006412,GO:0006418,GO:0006429,GO:0016874,GO:0106074	nucleotide binding,aminoacyl-tRNA editing activity,aminoacyl-tRNA ligase activity,leucine-tRNA ligase activity,ATP binding,translation,tRNA aminoacylation for protein translation,leucyl-tRNA aminoacylation,ligase activity,aminoacyl-tRNA metabolism involved in translational fidelity
LOC5574784	336.5	0.424893	0.135381	3.13849	0.00169822	0.0174704	AAEL011421	multiple inositol polyphosphate phosphatase [Source:VB Community Annotation]			GO:0004446,GO:0016311,GO:0016791,GO:0034417,GO:0052826	inositol-hexakisphosphate phosphatase activity,dephosphorylation,phosphatase activity,bisphosphoglycerate 3-phosphatase activity,inositol hexakisphosphate 2-phosphatase activity
LOC5576623	73.2178	-6.36139	2.02788	-3.13696	0.00170709	0.0175489	AAEL012648				GO:0005576,GO:0006030,GO:0008061	extracellular region,chitin metabolic process,chitin binding
LOC5572585	867.131	0.34286	0.10933	3.13601	0.00171262	0.0175931	AAEL009906				GO:0005515	protein binding
LOC5566097	668.965	-0.420247	0.134134	-3.13303	0.00173011	0.0177599	AAEL005169	carnitine o-acyltransferase [Source:VB Community Annotation]			GO:0016740,GO:0016746	transferase activity,transferase activity, transferring acyl groups
LOC5579965	42.2556	-1.08214	0.345506	-3.13205	0.00173588	0.0178063	AAEL025755				GO:0003824	catalytic activity
LOC110677637	17.7465	1.62451	0.518846	3.13101	0.00174206	0.0178567	AAEL024621
LOC110673976	46.8077	1.01672	0.324767	3.1306	0.00174447	0.0178686	AAEL019902				GO:0030246	carbohydrate binding
LOC5575726	293.026	-0.499005	0.159448	-3.12959	0.00175052	0.0179176	AAEL012038				GO:0003676,GO:0003677,GO:0005634,GO:0008270,GO:0046872	nucleic acid binding,DNA binding,nucleus,zinc ion binding,metal ion binding
LOC5569474	1520.3	-0.522163	0.167101	-3.12483	0.00177909	0.0181944	AAEL007653	allantoinase [Source:VB Community Annotation]			GO:0000256,GO:0004038,GO:0006259,GO:0008270,GO:0016787,GO:0016810,GO:0016812,GO:0016888,GO:0046872,GO:0050897	allantoin catabolic process,allantoinase activity,DNA metabolic process,zinc ion binding,hydrolase activity,hydrolase activity, acting on carbon-nitrogen (but not peptide) bonds,hydrolase activity, acting on carbon-nitrogen (but not peptide) bonds, in cyclic amides,endodeoxyribonuclease activity, producing 5'-phosphomonoesters,metal ion binding,cobalt ion binding
LOC110676092	383.372	0.478373	0.153096	3.12466	0.00178012	0.0181944	AAEL025498				GO:0002376,GO:0005737,GO:0007165,GO:0016787,GO:0034128,GO:0035591,GO:0045087,GO:0048678,GO:0050135,GO:0061809	immune system process,cytoplasm,signal transduction,hydrolase activity,negative regulation of MyD88-independent toll-like receptor signaling pathway,signaling adaptor activity,innate immune response,response to axon injury,NAD(P)+ nucleosidase activity,NAD+ nucleotidase, cyclic ADP-ribose generating
LOC110679218	3.10288	-5.0242	1.60887	-3.1228	0.00179139	0.0182701	AAEL025639
LOC110679239	3.10288	-5.0242	1.60887	-3.1228	0.00179139	0.0182701	AAEL023111
LOC110679453	3.10288	-5.0242	1.60887	-3.1228	0.00179139	0.0182701	AAEL020971
LOC5565745	136.976	0.66339	0.212532	3.12137	0.00180012	0.018346	AAEL019832
LOC5579043	2307.02	-0.615769	0.1973	-3.12098	0.00180247	0.0183568	AAEL013987
LOC5572762	486.233	0.542178	0.173767	3.12015	0.00180757	0.0183955	AAEL027479				GO:0005515,GO:0005634	protein binding,nucleus
LOC5571158	142.949	-0.567445	0.181913	-3.11932	0.0018127	0.0184345	AAEL008842				GO:0005634,GO:0005737,GO:0008140,GO:0032793,GO:0051289	nucleus,cytoplasm,cAMP response element binding protein binding,positive regulation of CREB transcription factor activity,protein homotetramerization
LOC110676121	7.4625	-5.30226	1.7008	-3.1175	0.00182393	0.0185354	AAEL019614
LOC5579926	299.089	-0.715811	0.229671	-3.11668	0.00182897	0.0185734	AAEL006795	cytochrome P450 [Source:VB Community Annotation]	CYP9J15		GO:0004497,GO:0005506,GO:0016491,GO:0016705,GO:0020037,GO:0046872,GO:0055114	monooxygenase activity,iron ion binding,oxidoreductase activity,oxidoreductase activity, acting on paired donors, with incorporation or reduction of molecular oxygen,heme binding,metal ion binding,oxidation-reduction process
LOC5578898	512.114	0.554168	0.177949	3.11419	0.00184453	0.018718	AAEL013902	pcdc2/rp-8 (programmed cell death protein 2) [Source:VB Community Annotation]			GO:0005737	cytoplasm
LOC5574470	255.556	-0.472261	0.151758	-3.11194	0.00185865	0.0188478	AAEL002385	Carboxy/choline esterase Alpha Esterase [Source:VB Community Annotation]	CCEAE3B		GO:0016787,GO:0052689	hydrolase activity,carboxylic ester hydrolase activity
LOC5576074	151.803	-0.607357	0.195515	-3.10645	0.00189346	0.0191871	AAEL025658				GO:0005737,GO:0005829,GO:0008152,GO:0016787,GO:0016798,GO:0033925	cytoplasm,cytosol,metabolic process,hydrolase activity,hydrolase activity, acting on glycosyl bonds,mannosyl-glycoprotein endo-beta-N-acetylglucosaminidase activity
LOC5576312	1118.59	0.401144	0.129161	3.10576	0.0018979	0.0192185	AAEL028013				GO:0003824,GO:0008483,GO:0030170	catalytic activity,transaminase activity,pyridoxal phosphate binding
LOC5577495	7.34857	-4.32937	1.39457	-3.10445	0.00190633	0.0192863	AAEL003182	Serine Protease Inhibitor (serpin) homologue - unlikely to be inhibitory. [Source:VB Community Annotation]	SRPN26		GO:0004867,GO:0005615,GO:0010466,GO:0010951,GO:0030414	serine-type endopeptidase inhibitor activity,extracellular space,negative regulation of peptidase activity,negative regulation of endopeptidase activity,peptidase inhibitor activity
LOC5575613	754.359	-2.0764	0.668879	-3.1043	0.00190732	0.0192863	AAEL011944	carboxy/choline esterase Alpha Esterase [Source:VB Community Annotation]	CCEAE3O		GO:0016787,GO:0052689	hydrolase activity,carboxylic ester hydrolase activity
LOC5574896	25.1052	-2.28769	0.737165	-3.10336	0.00191335	0.0193336	AAEL011501				GO:0042302	structural constituent of cuticle
LOC5565319	189.438	0.51636	0.166443	3.10232	0.00192011	0.0193365	AAEL004724	Carboxylic ester hydrolase (Fragment) [Source:UniProtKB/TrEMBL;Acc:Q17C44]			GO:0016787,GO:0052689	hydrolase activity,carboxylic ester hydrolase activity
LOC5576084	1800.9	0.567131	0.18281	3.1023	0.00192025	0.0193365	AAEL012318	2-amino-3-ketobutyrate coenzyme a ligase [Source:VB Community Annotation]			GO:0003824,GO:0006567,GO:0008890,GO:0009058,GO:0016740,GO:0030170	catalytic activity,threonine catabolic process,glycine C-acetyltransferase activity,biosynthetic process,transferase activity,pyridoxal phosphate binding
LOC5569007	1154.52	0.462961	0.149232	3.10229	0.00192029	0.0193365	AAEL007296	Fatty acyl-CoA reductase [Source:UniProtKB/TrEMBL;Acc:Q172R4]			GO:0006629,GO:0016020,GO:0016021,GO:0016491,GO:0055114,GO:0080019,GO:0102965	lipid metabolic process,membrane,integral component of membrane,oxidoreductase activity,oxidation-reduction process,fatty-acyl-CoA reductase (alcohol-forming) activity,alcohol-forming fatty acyl-CoA reductase activity
LOC5575136	125.32	-0.623247	0.2009	-3.10227	0.00192044	0.0193365	AAEL000362				GO:0005515	protein binding
LOC5570127	4261.58	-0.306978	0.0989528	-3.10227	0.00192045	0.0193365	AAEL008107	F14p3.9 protein (auxin transport protein) [Source:UniProtKB/TrEMBL;Acc:A0A1S4FIN3]			GO:0005515,GO:0008270,GO:0046872	protein binding,zinc ion binding,metal ion binding
LOC5578484	130.623	-0.651159	0.21002	-3.10046	0.00193221	0.0194412	AAEL000515	juvenile hormone-inducible protein, putative [Source:VB Community Annotation]
LOC5571852	899.955	-0.445927	0.143869	-3.09953	0.00193826	0.0194882	AAEL009339	activin receptor type I, putative [Source:VB Community Annotation]			GO:0000166,GO:0004672,GO:0004675,GO:0005524,GO:0006468,GO:0007178,GO:0016020,GO:0016021,GO:0016301,GO:0016310,GO:0016740	nucleotide binding,protein kinase activity,transmembrane receptor protein serine/threonine kinase activity,ATP binding,protein phosphorylation,transmembrane receptor protein serine/threonine kinase signaling pathway,membrane,integral component of membrane,kinase activity,phosphorylation,transferase activity
LOC5579002	40.8106	1.00947	0.325959	3.09691	0.00195548	0.0196388	AAEL003782
LOC5567887	698.418	-0.589265	0.190289	-3.09668	0.00195701	0.0196388	AAEL006327	sulfotransferase (sult) [Source:VB Community Annotation]			GO:0008146	sulfotransferase activity
LOC5567870	206.18	-1.0177	0.328647	-3.09662	0.00195739	0.0196388	AAEL006312				GO:0016020,GO:0016021	membrane,integral component of membrane
LOC5577369	4204.02	0.407704	0.131698	3.09575	0.00196318	0.0196739	AAEL000454	isocitrate dehydrogenase [Source:VB Community Annotation]			GO:0000287,GO:0004449,GO:0005739,GO:0006099,GO:0016616,GO:0051287,GO:0055114	magnesium ion binding,isocitrate dehydrogenase (NAD+) activity,mitochondrion,tricarboxylic acid cycle,oxidoreductase activity, acting on the CH-OH group of donors, NAD or NADP as acceptor,NAD binding,oxidation-reduction process
LOC5575780	184.9	0.894545	0.288966	3.09568	0.00196365	0.0196739	AAEL002713	fibrinogen and fibronectin [Source:VB Community Annotation]
LOC5570921	110.176	0.700716	0.226371	3.09544	0.00196523	0.0196758	AAEL001495				GO:0016020,GO:0016021	membrane,integral component of membrane
LOC5573392	702.331	0.49768	0.16085	3.09406	0.0019744	0.0197537	AAEL002065	hydroxymethylglutaryl-coa lyase [Source:VB Community Annotation]			GO:0003824,GO:0004419,GO:0005829,GO:0016833	catalytic activity,hydroxymethylglutaryl-CoA lyase activity,cytosol,oxo-acid-lyase activity
LOC5573031	13655	0.346929	0.112136	3.09382	0.00197596	0.0197554	AAEL010205
LOC5570044	796.462	-0.370851	0.119897	-3.09308	0.00198088	0.0197824	AAEL019940				GO:0003676	nucleic acid binding
LOC5565156	6177.75	-0.650553	0.210338	-3.0929	0.00198214	0.0197824	AAEL004616	actin [Source:VB Community Annotation]			GO:0005524,GO:0005737,GO:0005856	ATP binding,cytoplasm,cytoskeleton
LOC5567650	193.616	-0.827314	0.267513	-3.09262	0.00198399	0.0197824	AAEL006238				GO:0016020,GO:0016021	membrane,integral component of membrane
LOC5570081	38.4035	-1.22706	0.396793	-3.09245	0.00198514	0.0197824	AAEL019483				GO:0003676	nucleic acid binding
LOC5575648	257.942	0.598151	0.193428	3.09237	0.00198562	0.0197824	AAEL014265
LOC5579841	56.7415	-0.908002	0.293687	-3.09173	0.00198991	0.0198112	AAEL024941				GO:0016020,GO:0016021	membrane,integral component of membrane
LOC110680245	204.378	0.562381	0.181955	3.09077	0.00199637	0.0198616	AAEL020994
LOC5580250	7.06897	-2.83253	0.916549	-3.09043	0.00199867	0.0198706	AAEL012543	myosin motor, putative [Source:VB Community Annotation]			GO:0005737,GO:0005815	cytoplasm,microtubule organizing center
LOC5571114	119.605	-0.689917	0.223272	-3.09003	0.00200135	0.0198834	AAEL001519				GO:0005085	guanyl-nucleotide exchange factor activity
LOC5577021	69.8198	-1.0118	0.327883	-3.08586	0.00202967	0.0201506	AAEL012940
LOC110680264	156.764	-0.700893	0.227232	-3.08448	0.00203909	0.02023	AAEL024827				GO:0046983	protein dimerization activity
LOC5577506	159.778	-0.610571	0.198072	-3.08257	0.00205222	0.0203461	AAEL003192	mfs transporter [Source:VB Community Annotation]			GO:0016020,GO:0016021,GO:0022857,GO:0055085	membrane,integral component of membrane,transmembrane transporter activity,transmembrane transport
LOC5564936	121.343	0.716564	0.232561	3.08118	0.00206179	0.0204267	AAEL004502				GO:0004252,GO:0006508,GO:0016020,GO:0016021	serine-type endopeptidase activity,proteolysis,membrane,integral component of membrane
LOC5565963	68.5078	0.835934	0.271368	3.08044	0.00206692	0.0204622	AAEL005049	heterogeneous nuclear ribonucleoprotein [Source:VB Community Annotation]			GO:0003676,GO:0003723,GO:0003729	nucleic acid binding,RNA binding,mRNA binding
LOC5569520	7378.86	0.457878	0.14865	3.08025	0.00206826	0.0204622	AAEL007707	malate dehydrogenase [Source:VB Community Annotation]			GO:0003824,GO:0005975,GO:0006099,GO:0006108,GO:0016491,GO:0016615,GO:0016616,GO:0019752,GO:0030060,GO:0055114	catalytic activity,carbohydrate metabolic process,tricarboxylic acid cycle,malate metabolic process,oxidoreductase activity,malate dehydrogenase activity,oxidoreductase activity, acting on the CH-OH group of donors, NAD or NADP as acceptor,carboxylic acid metabolic process,L-malate dehydrogenase activity,oxidation-reduction process
LOC5575478	560.026	-0.39155	0.127143	-3.07961	0.00207271	0.02049	AAEL011865				GO:0016740,GO:0017183	transferase activity,peptidyl-diphthamide biosynthetic process from peptidyl-histidine
LOC110681313	264.631	0.444357	0.144298	3.07943	0.00207396	0.02049	AAEL020938				GO:0005515	protein binding
LOC5574101	345.699	-0.45464	0.147779	-3.07648	0.00209457	0.0206793	AAEL002248				GO:0003676	nucleic acid binding
LOC5571956	122.094	-0.71815	0.233601	-3.07426	0.00211028	0.0208196	AAEL009442				GO:0003677,GO:0003700,GO:0006355,GO:0006357	DNA binding,DNA-binding transcription factor activity,regulation of transcription, DNA-templated,regulation of transcription by RNA polymerase II
LOC5568416	2323.66	-1.86031	0.605164	-3.07405	0.00211171	0.0208196	AAEL006824	Cytochrome P450 [Source:UniProtKB/TrEMBL;Acc:A0A1S4FEN8]			GO:0004497,GO:0005506,GO:0016020,GO:0016021,GO:0016491,GO:0016705,GO:0020037,GO:0046872,GO:0055114	monooxygenase activity,iron ion binding,membrane,integral component of membrane,oxidoreductase activity,oxidoreductase activity, acting on paired donors, with incorporation or reduction of molecular oxygen,heme binding,metal ion binding,oxidation-reduction process
LOC5574213	171.89	-0.624898	0.203384	-3.0725	0.00212272	0.0209136	AAEL021016				GO:0004888,GO:0004930,GO:0005886,GO:0007165,GO:0007166,GO:0007186,GO:0016020,GO:0016021	transmembrane signaling receptor activity,G protein-coupled receptor activity,plasma membrane,signal transduction,cell surface receptor signaling pathway,G protein-coupled receptor signaling pathway,membrane,integral component of membrane
LOC5565724	57.5556	-2.41425	0.785851	-3.07214	0.00212527	0.0209242	AAEL004953	elongase, putative [Source:VB Community Annotation]			GO:0006629,GO:0006631,GO:0006633,GO:0016020,GO:0016021,GO:0016740,GO:0102336,GO:0102337,GO:0102338,GO:0102756	lipid metabolic process,fatty acid metabolic process,fatty acid biosynthetic process,membrane,integral component of membrane,transferase activity,3-oxo-arachidoyl-CoA synthase activity,3-oxo-cerotoyl-CoA synthase activity,3-oxo-lignoceronyl-CoA synthase activity,very-long-chain 3-ketoacyl-CoA synthase activity
LOC5564060	235.791	0.619931	0.202077	3.0678	0.0021564	0.0212161	AAEL004063	WD-repeat protein [Source:VB Community Annotation]			GO:0005515	protein binding
LOC110680850	223.156	-0.674141	0.21977	-3.06749	0.00215864	0.0212234
LOC5576558	556.312	0.444725	0.145021	3.06663	0.0021649	0.0212495	AAEL012613
LOC5575747	16.3354	-1.63084	0.531814	-3.06656	0.00216535	0.0212495	AAEL025260
LOC5565699	310.278	0.820835	0.267678	3.0665	0.00216578	0.0212495	AAEL004931	beta-hexosaminidase b [Source:VB Community Annotation]			GO:0004553,GO:0004563,GO:0005975,GO:0008152,GO:0016787,GO:0016798,GO:0102148	hydrolase activity, hydrolyzing O-glycosyl compounds,beta-N-acetylhexosaminidase activity,carbohydrate metabolic process,metabolic process,hydrolase activity,hydrolase activity, acting on glycosyl bonds,N-acetyl-beta-D-galactosaminidase activity
LOC5573563	166.64	0.708104	0.230956	3.06597	0.00216962	0.0212597	AAEL002117
LOC5573590	498.633	-0.400153	0.130515	-3.06595	0.00216982	0.0212597	AAEL019577				GO:0005515,GO:0016301,GO:0016310	protein binding,kinase activity,phosphorylation
LOC5569455	191.643	-0.757736	0.247194	-3.06535	0.00217417	0.021275	AAEL007644	GPCR Orphan/Putative Class A Family [Source:VB Community Annotation]	GPRNNA6		GO:0004930,GO:0007165,GO:0007186,GO:0016020,GO:0016021	G protein-coupled receptor activity,signal transduction,G protein-coupled receptor signaling pathway,membrane,integral component of membrane
LOC110681103	524.083	-0.55268	0.180301	-3.06532	0.00217437	0.021275	AAEL021382				GO:0008374,GO:0016746,GO:0044255	O-acyltransferase activity,transferase activity, transferring acyl groups,cellular lipid metabolic process
LOC5567781	1065.43	-0.429188	0.140084	-3.06379	0.00218555	0.0213696	AAEL000119	AMP dependent coa ligase [Source:VB Community Annotation]			GO:0003824	catalytic activity
LOC5571537	856.18	-0.52869	0.172581	-3.06343	0.00218813	0.0213723	AAEL009128	cytochrome P450 [Source:VB Community Annotation]	CYP6M6		GO:0004497,GO:0005506,GO:0016491,GO:0016705,GO:0020037,GO:0046872,GO:0055114	monooxygenase activity,iron ion binding,oxidoreductase activity,oxidoreductase activity, acting on paired donors, with incorporation or reduction of molecular oxygen,heme binding,metal ion binding,oxidation-reduction process
LOC5572927	977.466	0.546975	0.178555	3.06334	0.00218883	0.0213723	AAEL010147				GO:0004842,GO:0016567,GO:0046872,GO:0071797	ubiquitin-protein transferase activity,protein ubiquitination,metal ion binding,LUBAC complex
LOC5569166	335.069	0.528795	0.172759	3.06089	0.00220682	0.0215331	AAEL007431				GO:0001522,GO:0006364,GO:0030515,GO:0042254	pseudouridine synthesis,rRNA processing,snoRNA binding,ribosome biogenesis
LOC110677638	17.3113	1.52657	0.498902	3.05985	0.00221445	0.0215924	AAEL021936
LOC5566117	47.837	0.914112	0.298763	3.05965	0.00221593	0.0215924	AAEL021180
LOC5578517	311.393	-0.512817	0.167672	-3.05845	0.00222482	0.0216641	AAEL013724				GO:0005794,GO:0016020,GO:0016192	Golgi apparatus,membrane,vesicle-mediated transport
LOC110677987	2.96923	-4.95908	1.62183	-3.05772	0.0022303	0.0216942	AAEL024137				GO:0000166,GO:0004672,GO:0004674,GO:0005524,GO:0006468	nucleotide binding,protein kinase activity,protein serine/threonine kinase activity,ATP binding,protein phosphorylation
LOC5572046	232.47	1.10611	0.361755	3.05763	0.00223095	0.0216942	AAEL000227	Class B Scavenger Receptor (CD36 domain). [Source:VB Community Annotation]	SCRB8		GO:0005886,GO:0016020,GO:0016021	plasma membrane,membrane,integral component of membrane
LOC110674875	6.55046	-3.53014	1.15522	-3.05582	0.00224445	0.0218105	AAEL026742
LOC5577555	119.483	-0.722352	0.236541	-3.05382	0.0022595	0.0219417	AAEL013267				GO:0016020,GO:0016021,GO:0016740,GO:0016757	membrane,integral component of membrane,transferase activity,transferase activity, transferring glycosyl groups
LOC5579922	57.792	-0.916888	0.300344	-3.05279	0.00226723	0.0220017	AAEL006801	Vang-like protein [Source:UniProtKB/TrEMBL;Acc:Q174T9]			GO:0005886,GO:0007275,GO:0016020,GO:0016021	plasma membrane,multicellular organism development,membrane,integral component of membrane
LOC5563844	4.77543	-4.62141	1.51398	-3.0525	0.00226947	0.0220084	AAEL014174
LOC5569139	76.2806	0.833266	0.27301	3.05214	0.00227213	0.0220192	AAEL019881	Sex peptide receptor [Source:UniProtKB/TrEMBL;Acc:B0F4E9]			GO:0004930,GO:0007186,GO:0008528,GO:0016020,GO:0016021	G protein-coupled receptor activity,G protein-coupled receptor signaling pathway,G protein-coupled peptide receptor activity,membrane,integral component of membrane
LOC110674234	6.63424	-3.56005	1.16664	-3.05155	0.0022766	0.0220475	AAEL025079
LOC5575841	12835.1	0.560774	0.183786	3.05123	0.00227902	0.0220559	AAEL012114	troponin C [Source:VB Community Annotation]			GO:0005509	calcium ion binding
LOC5566803	195.907	-0.649432	0.212948	-3.04972	0.00229053	0.0221454	AAEL005643	guanine nucleotide exchange factor [Source:VB Community Annotation]			GO:0005085,GO:0005096,GO:0005515,GO:0007165,GO:0007264,GO:0043547	guanyl-nucleotide exchange factor activity,GTPase activator activity,protein binding,signal transduction,small GTPase mediated signal transduction,positive regulation of GTPase activity
LOC5570566	35.6107	-1.24646	0.408729	-3.0496	0.0022915	0.0221454	AAEL008384	ATP-binding cassette sub-family A member 3, putative [Source:VB Community Annotation]			GO:0000166,GO:0005524,GO:0016020,GO:0016021,GO:0016887,GO:0042626,GO:0055085	nucleotide binding,ATP binding,membrane,integral component of membrane,ATPase activity,ATPase-coupled transmembrane transporter activity,transmembrane transport
LOC5578479	123.866	-4.18332	1.37185	-3.04941	0.00229294	0.0221454	AAEL000484
LOC5576127	10361.7	0.378557	0.124182	3.04841	0.00230054	0.0222036	AAEL019525
LOC5567461	415.811	-0.430668	0.141295	-3.048	0.00230371	0.0222191	AAEL000970				GO:0003676,GO:0005515	nucleic acid binding,protein binding
LOC5573298	129.77	-0.619177	0.203292	-3.04575	0.00232098	0.0223524	AAEL010390	glucosyl/glucuronosyl transferases [Source:VB Community Annotation]			GO:0008194,GO:0015020,GO:0016020,GO:0016021,GO:0016740,GO:0016757,GO:0016758	UDP-glycosyltransferase activity,glucuronosyltransferase activity,membrane,integral component of membrane,transferase activity,transferase activity, transferring glycosyl groups,transferase activity, transferring hexosyl groups
LOC5577377	237.894	0.518364	0.170199	3.04564	0.00232189	0.0223524	AAEL000428	tryptophan 2,3-dioxygenase (TDO)(EC 1.13.11.11) [Source:VB Community Annotation]	Tdo		GO:0004833,GO:0005575,GO:0006569,GO:0006727,GO:0016491,GO:0019441,GO:0020037,GO:0046872,GO:0051213,GO:0055114	tryptophan 2,3-dioxygenase activity,cellular_component,tryptophan catabolic process,ommochrome biosynthetic process,oxidoreductase activity,tryptophan catabolic process to kynurenine,heme binding,metal ion binding,dioxygenase activity,oxidation-reduction process
LOC5578315	7048.15	0.673573	0.221163	3.04559	0.00232225	0.0223524	AAEL013637	homogentisate 1,2-dioxygenase [Source:VB Community Annotation]			GO:0004411,GO:0006559,GO:0006570,GO:0046872,GO:0055114	homogentisate 1,2-dioxygenase activity,L-phenylalanine catabolic process,tyrosine metabolic process,metal ion binding,oxidation-reduction process
LOC110676718	4.58513	-4.5764	1.50474	-3.04133	0.00235538	0.022656	AAEL021981
LOC5579095	211.065	1.58815	0.522538	3.03929	0.00237135	0.0227942	AAEL003857	defensin anti-microbial peptide [Source:VB Community Annotation]	DEFD		GO:0002376,GO:0005576,GO:0006952,GO:0042742,GO:0045087	immune system process,extracellular region,defense response,defense response to bacterium,innate immune response
LOC5575574	56.6553	0.944862	0.310928	3.03885	0.00237485	0.0228124	AAEL002665	matrix metalloproteinase [Source:VB Community Annotation]			GO:0004222,GO:0006508,GO:0008233,GO:0008237,GO:0008270,GO:0016787,GO:0031012,GO:0046872	metalloendopeptidase activity,proteolysis,peptidase activity,metallopeptidase activity,zinc ion binding,hydrolase activity,extracellular matrix,metal ion binding
LOC5564950	223.879	-0.792587	0.260883	-3.03809	0.0023808	0.0228438	AAEL014662	AMP dependent coa ligase [Source:VB Community Annotation]			GO:0003824	catalytic activity
LOC5572840	3945.4	0.331324	0.109059	3.03803	0.00238134	0.0228438	AAEL010063	chaperonin [Source:VB Community Annotation]			GO:0000166,GO:0005524,GO:0005737,GO:0006457,GO:0051082	nucleotide binding,ATP binding,cytoplasm,protein folding,unfolded protein binding
LOC5572427	569.92	0.463302	0.152541	3.03722	0.00238769	0.0228892	AAEL001816	glucosyl/glucuronosyl transferases [Source:VB Community Annotation]			GO:0008194,GO:0015020,GO:0016020,GO:0016021,GO:0016740,GO:0016757,GO:0016758	UDP-glycosyltransferase activity,glucuronosyltransferase activity,membrane,integral component of membrane,transferase activity,transferase activity, transferring glycosyl groups,transferase activity, transferring hexosyl groups
LOC5579410	37.6646	1.14508	0.377108	3.03648	0.0023936	0.0229305	AAEL015465	clip-domain serine protease, putative [Source:VB Community Annotation]			GO:0004252,GO:0006508	serine-type endopeptidase activity,proteolysis
LOC5579998	561.941	0.351187	0.115675	3.03598	0.00239755	0.0229528	AAEL001747				GO:0006629,GO:0016020,GO:0016021,GO:0016491,GO:0055114,GO:0080019,GO:0102965	lipid metabolic process,membrane,integral component of membrane,oxidoreductase activity,oxidation-reduction process,fatty-acyl-CoA reductase (alcohol-forming) activity,alcohol-forming fatty acyl-CoA reductase activity
LOC5572378	2110.1	0.385863	0.127123	3.03536	0.00240249	0.0229847	AAEL009766	lipoamide acyltransferase component of branched-chain alpha-keto acid dehydrogenase [Source:VB Community Annotation]			GO:0016740,GO:0016746	transferase activity,transferase activity, transferring acyl groups
LOC5574197	3215.84	-0.317655	0.104659	-3.03515	0.0024042	0.0229855	AAEL002296	trifunctional enzyme beta subunit (tp-beta) [Source:VB Community Annotation]			GO:0003824,GO:0016740,GO:0016746,GO:0016747	catalytic activity,transferase activity,transferase activity, transferring acyl groups,transferase activity, transferring acyl groups other than amino-acyl groups
LOC5578519	101.606	0.66019	0.217808	3.03106	0.00243697	0.0232831	AAEL013722	partner of burs, putative [Source:VB Community Annotation]			GO:0001664,GO:0005184,GO:0007165,GO:0031395	G protein-coupled receptor binding,neuropeptide hormone activity,signal transduction,bursicon neuropeptide hormone complex
LOC5564607	298.02	0.572764	0.189254	3.02643	0.00247464	0.0236271	AAEL014527	potassium-dependent sodium-calcium exchanger, putative [Source:VB Community Annotation]			GO:0006816,GO:0015297,GO:0016020,GO:0016021,GO:0055085	calcium ion transport,antiporter activity,membrane,integral component of membrane,transmembrane transport
LOC5563550	293.9	0.761362	0.251612	3.02594	0.00247861	0.0236492	AAEL000099	Clip-Domain Serine Protease family B. [Source:VB Community Annotation]	CLIPB33		GO:0004252,GO:0005576,GO:0006508,GO:0008233,GO:0008236,GO:0016787	serine-type endopeptidase activity,extracellular region,proteolysis,peptidase activity,serine-type peptidase activity,hydrolase activity
LOC5565631	264.279	0.656533	0.217059	3.02467	0.00248904	0.0237328	AAEL014910	synaptic vesicle protein [Source:VB Community Annotation]			GO:0016020,GO:0016021,GO:0022857,GO:0055085	membrane,integral component of membrane,transmembrane transporter activity,transmembrane transport
LOC110674861	374.262	-3.42853	1.13372	-3.02415	0.00249336	0.0237421	AAEL022681
LOC110680502	374.262	-3.42853	1.13372	-3.02415	0.00249336	0.0237421	AAEL024797
LOC5575351	1401.8	0.958149	0.316981	3.02273	0.00250503	0.0238372	AAEL002610	serine protease [Source:VB Community Annotation]			GO:0004252,GO:0006508	serine-type endopeptidase activity,proteolysis
LOC5567182	255.138	1.13967	0.377106	3.02216	0.00250978	0.0238664	AAEL000910	Fatty acyl-CoA reductase [Source:UniProtKB/TrEMBL;Acc:Q17MZ2]			GO:0006629,GO:0016491,GO:0055114,GO:0080019,GO:0102965	lipid metabolic process,oxidoreductase activity,oxidation-reduction process,fatty-acyl-CoA reductase (alcohol-forming) activity,alcohol-forming fatty acyl-CoA reductase activity
LOC5565071	102.889	0.693697	0.229677	3.02032	0.00252509	0.0239959	AAEL004569				GO:0016020,GO:0016021	membrane,integral component of membrane
LOC5575873	304.98	-0.593816	0.196641	-3.01979	0.00252948	0.0240216	AAEL012143	caspase (short) [Source:VB Community Annotation]	CASPS7		GO:0004197,GO:0006508,GO:0006915,GO:0008233,GO:0008234,GO:0016787	cysteine-type endopeptidase activity,proteolysis,apoptotic process,peptidase activity,cysteine-type peptidase activity,hydrolase activity
LOC5577598	11294.7	1.6606	0.550036	3.01908	0.00253541	0.0240618	AAEL003232				GO:0042302	structural constituent of cuticle
LOC110680420	66.7624	-0.845761	0.280197	-3.01845	0.00254068	0.0240856	AAEL020701
LOC5577056	1608.61	-0.79535	0.263502	-3.01838	0.0025413	0.0240856	AAEL019695				GO:0005576,GO:0008061	extracellular region,chitin binding
LOC5566344	226.746	0.840922	0.278666	3.01767	0.00254729	0.0241152	AAEL020936				GO:0004089,GO:0008270	carbonate dehydratase activity,zinc ion binding
LOC5570013	212.89	0.754896	0.250164	3.0176	0.00254782	0.0241152	AAEL000173	chromatin assembly factor-I p150 subunit, putative [Source:VB Community Annotation]			GO:0005634	nucleus
LOC5569951	2112.29	0.476939	0.15807	3.01727	0.00255061	0.0241255	AAEL008046	rh antigen [Source:VB Community Annotation]			GO:0005887,GO:0008519,GO:0015696,GO:0016020,GO:0016021,GO:0072488	integral component of plasma membrane,ammonium transmembrane transporter activity,ammonium transport,membrane,integral component of membrane,ammonium transmembrane transport
LOC5574893	287.503	0.513058	0.170121	3.01585	0.00256263	0.0242231	AAEL011481	Odorant binding protein OBP43 [Source:UniProtKB/TrEMBL;Acc:A0A1S4FTT5]	OBP54		GO:0005549	odorant binding
LOC5571521	179.085	-1.24332	0.412952	-3.0108	0.00260556	0.0246125	AAEL009114				GO:0003677,GO:0003700,GO:0005634,GO:0006355,GO:0043565,GO:0046872	DNA binding,DNA-binding transcription factor activity,nucleus,regulation of transcription, DNA-templated,sequence-specific DNA binding,metal ion binding
LOC5571498	465.896	-0.730977	0.242869	-3.00975	0.00261462	0.0246817	AAEL001626	zinc/iron transporter [Source:VB Community Annotation]			GO:0016020,GO:0016021,GO:0030001,GO:0046873,GO:0055085	membrane,integral component of membrane,metal ion transport,metal ion transmembrane transporter activity,transmembrane transport
LOC5564353	3489.41	0.373116	0.12398	3.0095	0.00261678	0.0246857	AAEL004221	glycogen synthase [Source:VB Community Annotation]			GO:0004373,GO:0005978,GO:0016740,GO:0016757	glycogen (starch) synthase activity,glycogen biosynthetic process,transferase activity,transferase activity, transferring glycosyl groups
LOC110674701	2.93238	-4.94365	1.64378	-3.00748	0.00263425	0.0248339	AAEL020732
LOC110675520	46.8863	1.103	0.366967	3.00571	0.0026496	0.0249546	AAEL024417
LOC110675215	110.363	-1.02596	0.341369	-3.00542	0.0026521	0.0249546	AAEL024593
LOC23687671	2256.91	-0.267729	0.089085	-3.00532	0.00265304	0.0249546	AAEL017251		AGO2		GO:0003676,GO:0005515,GO:0031047	nucleic acid binding,protein binding,gene silencing by RNA
LOC5564141	299.389	0.612888	0.203942	3.0052	0.00265407	0.0249546	AAEL004120	Niemann-Pick Type C-2, putative [Source:VB Community Annotation]			GO:0005576,GO:0005623,GO:0032367	extracellular region,obsolete cell,intracellular cholesterol transport
LOC110674164	749.333	-0.3495	0.116355	-3.00373	0.0026669	0.0250587	AAEL011982	cortactin [Source:VB Community Annotation]			GO:0005515	protein binding
LOC5577738	1436.98	-0.581441	0.193631	-3.00283	0.00267484	0.0251166	AAEL003290	cell wall protein DAN4 precursor, putative [Source:VB Community Annotation]
LOC5575931	1037.91	-0.382579	0.127443	-3.00195	0.00268256	0.0251725	AAEL012161				GO:0006081,GO:0016020,GO:0016021,GO:0016491,GO:0016620,GO:0055114	cellular aldehyde metabolic process,membrane,integral component of membrane,oxidoreductase activity,oxidoreductase activity, acting on the aldehyde or oxo group of donors, NAD or NADP as acceptor,oxidation-reduction process
LOC5572116	282.882	-0.849629	0.283083	-3.00134	0.00268796	0.0251926	AAEL009531	niemann-pick C1 [Source:VB Community Annotation]			GO:0005319,GO:0006869,GO:0016020,GO:0016021	lipid transporter activity,lipid transport,membrane,integral component of membrane
LOC5565278	197.666	-0.622135	0.207299	-3.00115	0.00268959	0.0251926	AAEL023512
LOC110674479	5.61569	-3.94922	1.31592	-3.0011	0.00269002	0.0251926	AAEL024404
LOC5579960	627.502	-0.388574	0.129536	-2.99975	0.00270204	0.025282	AAEL023547				GO:0005085,GO:0005515,GO:0005737,GO:0007264	guanyl-nucleotide exchange factor activity,protein binding,cytoplasm,small GTPase mediated signal transduction
LOC5567173	421.572	-0.415499	0.138517	-2.99962	0.00270313	0.025282	AAEL019532				GO:0005515,GO:0005516,GO:0016020	protein binding,calmodulin binding,membrane
LOC5571585	668.009	0.328872	0.109652	2.99924	0.00270653	0.0252971	AAEL019995	Putative translocase of outer membrane 34 [Source:UniProtKB/TrEMBL;Acc:A0A0N8ERY3]			GO:0005515,GO:0005737,GO:0007275,GO:0007517,GO:0030154	protein binding,cytoplasm,multicellular organism development,muscle organ development,cell differentiation
LOC5568099	1379.97	-0.313201	0.104443	-2.99879	0.00271057	0.0253183	AAEL006552	WD-repeat protein [Source:VB Community Annotation]			GO:0005515	protein binding
LOC5577550	1293.96	-0.914006	0.304839	-2.99832	0.00271468	0.02533	AAEL013263	high affinity copper transporter, putative [Source:VB Community Annotation]			GO:0005375,GO:0006811,GO:0006825,GO:0006878,GO:0016020,GO:0016021,GO:0035434	copper ion transmembrane transporter activity,ion transport,copper ion transport,cellular copper ion homeostasis,membrane,integral component of membrane,copper ion transmembrane transport
LOC5572584	1120.97	-0.415514	0.138586	-2.99825	0.00271539	0.02533	AAEL009909	cln3/battenin [Source:VB Community Annotation]			GO:0005765,GO:0016020,GO:0016021	lysosomal membrane,membrane,integral component of membrane
LOC5572559	1805.91	-0.450235	0.150202	-2.99753	0.0027218	0.0253731	AAEL009895	neprilysin [Source:VB Community Annotation]			GO:0004222,GO:0005886,GO:0006508,GO:0008233,GO:0008237,GO:0016020,GO:0016021,GO:0016787,GO:0046872	metalloendopeptidase activity,plasma membrane,proteolysis,peptidase activity,metallopeptidase activity,membrane,integral component of membrane,hydrolase activity,metal ion binding
LOC5572334	75.8163	0.784461	0.261782	2.99661	0.00272995	0.0254324	AAEL020362				GO:0004252,GO:0006508	serine-type endopeptidase activity,proteolysis
LOC5570453	57.0747	-1.81929	0.607359	-2.99541	0.00274078	0.0255165	AAEL008346	achaete-scute complex protein T3, putative [Source:VB Community Annotation]			GO:0003677,GO:0003700,GO:0006357,GO:0046983	DNA binding,DNA-binding transcription factor activity,regulation of transcription by RNA polymerase II,protein dimerization activity
LOC5569122	7495.49	-0.561163	0.187491	-2.99301	0.00276244	0.0257014	AAEL007383	secreted ferritin G subunit precursor, putative [Source:VB Community Annotation]			GO:0004322,GO:0005623,GO:0006826,GO:0006879,GO:0008199,GO:0016491,GO:0046872,GO:0055114	ferroxidase activity,obsolete cell,iron ion transport,cellular iron ion homeostasis,ferric iron binding,oxidoreductase activity,metal ion binding,oxidation-reduction process
LOC5573258	103.946	0.709184	0.23714	2.99056	0.00278463	0.0258762	AAEL010362				GO:0001522,GO:0003723,GO:0008033,GO:0009451,GO:0009982,GO:0016853,GO:0106029	pseudouridine synthesis,RNA binding,tRNA processing,RNA modification,pseudouridine synthase activity,isomerase activity,tRNA pseudouridine synthase activity
LOC5569075	827.758	-0.364974	0.122043	-2.99054	0.00278488	0.0258762	AAEL001215				GO:0043066	negative regulation of apoptotic process
LOC110679182	20.5167	1.61339	0.539856	2.98856	0.002803	0.0260276	AAEL020361
LOC5566499	69.2187	-0.868895	0.290781	-2.98814	0.00280677	0.0260456	AAEL005440
LOC5571265	4734.95	-0.408443	0.136748	-2.98684	0.00281876	0.0261398	AAEL001588	glutamate carboxypeptidase [Source:VB Community Annotation]			GO:0004180,GO:0006508,GO:0008237,GO:0016787,GO:0016805,GO:0046872,GO:0070573	carboxypeptidase activity,proteolysis,metallopeptidase activity,hydrolase activity,dipeptidase activity,metal ion binding,metallodipeptidase activity
LOC23687408	3609.12	0.371044	0.124255	2.98615	0.00282515	0.0261819	AAEL019737				GO:0005515	protein binding
LOC110677165	16.0313	1.95769	0.655858	2.98493	0.0028364	0.0262322	AAEL026376
LOC5578744	6.00147	-3.40073	1.13933	-2.98485	0.00283717	0.0262322	AAEL020575
LOC5566024	653.382	0.728451	0.244053	2.98481	0.00283751	0.0262322	AAEL023844				GO:0016787,GO:0052689	hydrolase activity,carboxylic ester hydrolase activity
LOC5577776	3426.68	0.416245	0.139462	2.98465	0.00283905	0.0262322	AAEL003291
LOC5565828	695.042	-0.397947	0.133341	-2.98443	0.00284109	0.0262322	AAEL014999				GO:0003676,GO:0003723,GO:1990904	nucleic acid binding,RNA binding,ribonucleoprotein complex
LOC5566461	473.663	-0.420428	0.140877	-2.98437	0.00284166	0.0262322	AAEL005425				GO:0004672,GO:0005524,GO:0006468,GO:0016301,GO:0016310	protein kinase activity,ATP binding,protein phosphorylation,kinase activity,phosphorylation
LOC5572380	145.994	-2.59568	0.87018	-2.98292	0.00285513	0.0263225	AAEL009762	cytochrome P450 [Source:VB Community Annotation]	CYP307A1		GO:0004497,GO:0005506,GO:0016491,GO:0016705,GO:0020037,GO:0046872,GO:0055114	monooxygenase activity,iron ion binding,oxidoreductase activity,oxidoreductase activity, acting on paired donors, with incorporation or reduction of molecular oxygen,heme binding,metal ion binding,oxidation-reduction process
LOC5575022	121.33	-1.93336	0.648144	-2.98292	0.00285514	0.0263225	AAEL011586				GO:0005576,GO:0008061	extracellular region,chitin binding
LOC5566559	2.79018	4.99258	1.67392	2.98256	0.0028585	0.0263364	AAEL005487	cysteine-rich venom protein, putative [Source:VB Community Annotation]			GO:0005886,GO:0007165,GO:0016020,GO:0016021,GO:0050909	plasma membrane,signal transduction,membrane,integral component of membrane,sensory perception of taste
LOC5571654	441.767	0.372185	0.124798	2.98231	0.00286083	0.0263408	AAEL001646	inward-rectifying potassium channel [Source:VB Community Annotation]	Kir3	Irk3	GO:0005242,GO:0005244,GO:0006811,GO:0006813,GO:0016020,GO:0016021,GO:0034220,GO:0034765,GO:0071805	inward rectifier potassium channel activity,voltage-gated ion channel activity,ion transport,potassium ion transport,membrane,integral component of membrane,ion transmembrane transport,regulation of ion transmembrane transport,potassium ion transmembrane transport
LOC110678144	2.76304	4.98092	1.67138	2.98013	0.00288127	0.0265118	AAEL021345
LOC5568060	10.8894	-2.80751	0.942158	-2.97987	0.00288369	0.0265169	AAEL006498	long wavelength sensitive opsin [Source:VB Community Annotation]	GPROP1		GO:0004930,GO:0007165,GO:0007186,GO:0007601,GO:0007602,GO:0009881,GO:0016020,GO:0016021,GO:0018298,GO:0050896	G protein-coupled receptor activity,signal transduction,G protein-coupled receptor signaling pathway,visual perception,phototransduction,photoreceptor activity,membrane,integral component of membrane,protein-chromophore linkage,response to stimulus
LOC5571987	180.216	-0.603895	0.2028	-2.97778	0.0029034	0.0266809	AAEL009463				GO:0016020,GO:0016021,GO:0016192	membrane,integral component of membrane,vesicle-mediated transport
LOC5578167	5801.44	0.494762	0.166163	2.97757	0.00290542	0.0266821	AAEL025514				GO:0004672,GO:0005085,GO:0005515,GO:0005524,GO:0006468	protein kinase activity,guanyl-nucleotide exchange factor activity,protein binding,ATP binding,protein phosphorylation
LOC5568730	241.065	-0.541589	0.181974	-2.97619	0.00291854	0.0267853	AAEL007088	ribitol kinase [Source:VB Community Annotation]			GO:0005975,GO:0016773	carbohydrate metabolic process,phosphotransferase activity, alcohol group as acceptor
LOC5563936	1173.26	0.780687	0.262469	2.9744	0.00293562	0.0269247	AAEL014240
LOC5578514	24.328	-3.51838	1.1831	-2.97387	0.00294073	0.0269542	AAEL013718
LOC5566787	312.25	-0.459792	0.15468	-2.97253	0.00295354	0.0270541	AAEL019539				GO:0016020,GO:0016021,GO:0016409,GO:0016740,GO:0016746,GO:0019706	membrane,integral component of membrane,palmitoyltransferase activity,transferase activity,transferase activity, transferring acyl groups,protein-cysteine S-palmitoyltransferase activity
LOC5570841	231.384	-0.570036	0.191967	-2.96945	0.00298336	0.0273097	AAEL008617
LOC5580325	4990.08	0.256747	0.0864825	2.96877	0.00298993	0.0273522	AAEL013068	protein phsophatase-2a [Source:VB Community Annotation]			GO:0004721,GO:0006470,GO:0016787	phosphoprotein phosphatase activity,protein dephosphorylation,hydrolase activity
LOC5576682	258.248	-0.876996	0.295565	-2.96719	0.00300538	0.0274758	AAEL012709				GO:0003779,GO:0005515,GO:0016567	actin binding,protein binding,protein ubiquitination
LOC110675377	6.26431	-3.48115	1.17342	-2.96666	0.00301056	0.0274851	AAEL020046
LOC5573233	736.352	-0.478432	0.161278	-2.96651	0.00301202	0.0274851	AAEL010326	Phosphotriesterase-related protein (EC 3.1.-.-)(Parathion hydrolase-related protein) [Source:VB Community Annotation]			GO:0008270,GO:0009056,GO:0016787,GO:0016788,GO:0046872	zinc ion binding,catabolic process,hydrolase activity,hydrolase activity, acting on ester bonds,metal ion binding
LOC5577945	108.206	-0.650505	0.219287	-2.96645	0.00301255	0.0274851	AAEL019754				GO:0007165	signal transduction
LOC5564669	29.7517	2.45468	0.827526	2.96629	0.00301414	0.0274851	AAEL027829				GO:0004806,GO:0005515,GO:0005576,GO:0006629,GO:0052689	triglyceride lipase activity,protein binding,extracellular region,lipid metabolic process,carboxylic ester hydrolase activity
LOC5575435	367.052	0.44155	0.148881	2.96578	0.00301918	0.0275134	AAEL002644				GO:0016020,GO:0016021	membrane,integral component of membrane
LOC5575704	304.384	-0.416576	0.140487	-2.96523	0.00302457	0.0275449	AAEL012019				GO:0005515	protein binding
LOC5564603	986.103	0.407928	0.137683	2.9628	0.0030485	0.0277451	AAEL010086	DNA replication licensing factor MCM4 [Source:VB Community Annotation]			GO:0000166,GO:0003677,GO:0003678,GO:0004386,GO:0005524,GO:0005634,GO:0006260,GO:0006270,GO:0016787,GO:0032508,GO:0042555	nucleotide binding,DNA binding,DNA helicase activity,helicase activity,ATP binding,nucleus,DNA replication,DNA replication initiation,hydrolase activity,DNA duplex unwinding,MCM complex
LOC110675378	34.3903	-8.49179	2.86847	-2.96039	0.00307247	0.0279453	AAEL025434
LOC110675503	10.4865	-4.84697	1.63872	-2.95778	0.00309867	0.0281656	AAEL020037
LOC5576349	1033.83	0.374811	0.126735	2.95743	0.00310214	0.0281791	AAEL002867	phenylalanyl-tRNA synthetase alpha chain [Source:VB Community Annotation]			GO:0000049,GO:0000166,GO:0004812,GO:0004826,GO:0005524,GO:0005737,GO:0006412,GO:0006432,GO:0016874,GO:0043039	tRNA binding,nucleotide binding,aminoacyl-tRNA ligase activity,phenylalanine-tRNA ligase activity,ATP binding,cytoplasm,translation,phenylalanyl-tRNA aminoacylation,ligase activity,tRNA aminoacylation
LOC110680813	38.9261	-1.16801	0.395086	-2.95633	0.00311321	0.0282616	AAEL021312				GO:0005515,GO:0008191,GO:1904684	protein binding,metalloendopeptidase inhibitor activity,negative regulation of metalloendopeptidase activity
LOC5568213	415.074	-0.430242	0.145543	-2.95611	0.00311542	0.0282636	AAEL019739				GO:0003779,GO:0005515,GO:0005856,GO:0005886,GO:0008270,GO:0016020,GO:0042383,GO:0046872	actin binding,protein binding,cytoskeleton,plasma membrane,zinc ion binding,membrane,sarcolemma,metal ion binding
LOC110676917	87.0784	-0.744812	0.252042	-2.95511	0.00312559	0.0283266	AAEL027728
LOC5564855	678.688	-0.383491	0.129775	-2.95503	0.00312635	0.0283266	AAEL018348				GO:0000045,GO:0000422,GO:0006914	autophagosome assembly,autophagy of mitochondrion,autophagy
LOC5570849	198.706	0.579783	0.196225	2.95469	0.00312985	0.0283402	AAEL026976				GO:0000166,GO:0005524,GO:0016020,GO:0016887	nucleotide binding,ATP binding,membrane,ATPase activity
LOC110678552	9.64869	2.06385	0.69867	2.95398	0.00313707	0.0283875	AAEL021086
LOC5573415	167.899	-0.754232	0.255485	-2.95216	0.00315561	0.028528	AAEL019733				GO:0005515,GO:0007165	protein binding,signal transduction
LOC5566982	163.619	0.628303	0.212836	2.95205	0.0031567	0.028528	AAEL005731	forkhead box protein (AaegFOXL) [Source:VB Community Annotation]			GO:0003677,GO:0003700,GO:0005634,GO:0006355,GO:0007275,GO:0043565	DNA binding,DNA-binding transcription factor activity,nucleus,regulation of transcription, DNA-templated,multicellular organism development,sequence-specific DNA binding
LOC5575271	295.459	-0.532621	0.180436	-2.95186	0.00315862	0.028528	AAEL011736	cyclohex-1-ene-1-carboxyl-CoA hydratase, putative [Source:VB Community Annotation]			GO:0003824	catalytic activity
LOC5574244	4897.17	-0.579092	0.196305	-2.94997	0.00317809	0.0286539	AAEL021342	V-type proton ATPase subunit [Source:UniProtKB/TrEMBL;Acc:Q1HQS1]			GO:0006811,GO:0015078,GO:0015991,GO:0033179,GO:1902600	ion transport,proton transmembrane transporter activity,GO_0015991,proton-transporting V-type ATPase, V0 domain,proton transmembrane transport
LOC5565015	819.179	-0.408669	0.138538	-2.94987	0.00317903	0.0286539	AAEL014695	zinc finger protein [Source:VB Community Annotation]			GO:0003676	nucleic acid binding
LOC110676293	117.58	1.02207	0.346511	2.9496	0.00318186	0.0286539	AAEL003723	C-Type Lysozyme (Lys-A). [Source:VB Community Annotation]	LYSC11		GO:0003796	lysozyme activity
LOC5571029	577.895	-3.2843	1.11349	-2.94954	0.00318246	0.0286539	AAEL008759				GO:0042302	structural constituent of cuticle
LOC5575350	315.24	1.1749	0.398337	2.94952	0.00318264	0.0286539	AAEL002585	serine protease [Source:VB Community Annotation]			GO:0004252,GO:0006508	serine-type endopeptidase activity,proteolysis
LOC5576537	187.33	0.505399	0.171395	2.94873	0.00319079	0.028709	AAEL024887
LOC5569178	1613.25	0.456899	0.154966	2.94838	0.00319444	0.0287236	AAEL007452				GO:0003723,GO:0005515	RNA binding,protein binding
LOC23687601	6.61745	3.80562	1.29096	2.94791	0.00319931	0.0287493	AAEL017181	GPCR Muscarinic Acetylcholine Family [Source:VB Community Annotation]	GPRMAC1		GO:0004930,GO:0005886,GO:0005887,GO:0007165,GO:0007186,GO:0007213,GO:0016020,GO:0016021,GO:0016907,GO:0045202	G protein-coupled receptor activity,plasma membrane,integral component of plasma membrane,signal transduction,G protein-coupled receptor signaling pathway,G protein-coupled acetylcholine receptor signaling pathway,membrane,integral component of membrane,G protein-coupled acetylcholine receptor activity,synapse
LOC5567879	12.4902	-2.34618	0.795981	-2.94753	0.00320325	0.0287665	AAEL006348	deoxyribonuclease I, putative [Source:VB Community Annotation]			GO:0003676,GO:0016787,GO:0046872	nucleic acid binding,hydrolase activity,metal ion binding
LOC110679439	10.0825	2.12108	0.71994	2.94619	0.0032171	0.0288726	AAEL020802
LOC5568940	4350.38	0.290741	0.0987162	2.94522	0.00322726	0.0289455	AAEL007236				GO:0008168,GO:0016740,GO:0032259	methyltransferase activity,transferase activity,methylation
LOC5568178	573.739	0.363538	0.123498	2.94368	0.00324333	0.0290713	AAEL019914
LOC5564133	2653.24	0.352239	0.119696	2.94278	0.00325277	0.0291195	AAEL004088	aldo-keto reductase [Source:VB Community Annotation]			GO:0016491,GO:0055114	oxidoreductase activity,oxidation-reduction process
LOC5573766	147.683	-0.651857	0.221511	-2.94278	0.00325281	0.0291195	AAEL026994				GO:0000166,GO:0000288,GO:0000289,GO:0000932,GO:0003723,GO:0004672,GO:0005524,GO:0005737,GO:0006397,GO:0006468,GO:0010606,GO:0031251	nucleotide binding,nuclear-transcribed mRNA catabolic process, deadenylation-dependent decay,nuclear-transcribed mRNA poly(A) tail shortening,P-body,RNA binding,protein kinase activity,ATP binding,cytoplasm,mRNA processing,protein phosphorylation,positive regulation of cytoplasmic mRNA processing body assembly,PAN complex
LOC5579127	92.7146	-0.883537	0.300368	-2.94152	0.00326608	0.0292157	AAEL003853	nephrin [Source:VB Community Annotation]			GO:0005515	protein binding
LOC5572552	1316.84	0.503364	0.171133	2.94137	0.00326767	0.0292157	AAEL009883	26S protease (S4) regulatory subunit, putative [Source:UniProtKB/TrEMBL;Acc:Q16UJ3]			GO:0000166,GO:0005524,GO:0005739,GO:0007005,GO:0016887	nucleotide binding,ATP binding,mitochondrion,mitochondrion organization,ATPase activity
LOC5573419	886.132	0.384077	0.130597	2.94094	0.0032722	0.0292378	AAEL008406	cationic amino acid transporter [Source:VB Community Annotation]			GO:0016020,GO:0016021,GO:0022857,GO:0055085	membrane,integral component of membrane,transmembrane transporter activity,transmembrane transport
LOC5576606	768.372	-0.33108	0.11266	-2.93877	0.00329521	0.0294249	AAEL012632				GO:0003676	nucleic acid binding
LOC5566906	307.558	0.734811	0.250279	2.93596	0.00332512	0.0296733	AAEL025454				GO:0004252,GO:0006508,GO:0016020,GO:0016021	serine-type endopeptidase activity,proteolysis,membrane,integral component of membrane
LOC5575394	160.584	-0.645603	0.21995	-2.93523	0.00333301	0.0297251	AAEL019974				GO:0005254,GO:0005886,GO:0006811,GO:0006821,GO:0016020,GO:0016021,GO:0034707,GO:1902476	chloride channel activity,plasma membrane,ion transport,chloride transport,membrane,integral component of membrane,chloride channel complex,chloride transmembrane transport
LOC5578754	219.399	0.533652	0.181955	2.93288	0.00335836	0.0299324	AAEL003654				GO:0005634,GO:0008033,GO:0030488,GO:0031515	nucleus,tRNA processing,tRNA methylation,tRNA (m1A) methyltransferase complex
LOC5577974	2028.38	-0.336726	0.114836	-2.93223	0.00336543	0.0299765	AAEL011554	Adhesion regulating molecule 1 (110 kda cell membrane glycoprotein) [Source:UniProtKB/TrEMBL;Acc:A0A1S4FTJ1]			GO:0000502,GO:0005634,GO:0005737	proteasome complex,nucleus,cytoplasm
LOC5575386	23264	0.437378	0.149189	2.93171	0.00337101	0.0299935	AAEL011789	Probable citrate synthase 2, mitochondrial Precursor (EC 2.3.3.1) [Source:VB Community Annotation]			GO:0004108,GO:0005739,GO:0005759,GO:0005975,GO:0006099,GO:0006101,GO:0016740,GO:0046912	citrate (Si)-synthase activity,mitochondrion,mitochondrial matrix,carbohydrate metabolic process,tricarboxylic acid cycle,citrate metabolic process,transferase activity,transferase activity, transferring acyl groups, acyl groups converted into alkyl on transfer
LOC5574636	455.635	-0.38677	0.131928	-2.93166	0.00337155	0.0299935	AAEL011273	uridine cytidine kinase i [Source:VB Community Annotation]	ucdk1		GO:0000166,GO:0004849,GO:0005524,GO:0009116,GO:0016301,GO:0016310,GO:0016740,GO:0044206,GO:0044211	nucleotide binding,uridine kinase activity,ATP binding,nucleoside metabolic process,kinase activity,phosphorylation,transferase activity,UMP salvage,CTP salvage
LOC5577715	6.90248	2.88515	0.984504	2.93056	0.00338354	0.0300813	AAEL013351	lethal(2)essential for life protein, l2efl [Source:VB Community Annotation]			GO:0046872	metal ion binding
LOC5577266	158.307	-1.07623	0.367309	-2.93002	0.00338935	0.0301117	AAEL023768
LOC110673996	1024.55	0.410592	0.140141	2.92986	0.0033912	0.0301117	AAEL022067
LOC5579245	43.9569	0.92387	0.315375	2.92943	0.00339583	0.030134	AAEL015668				GO:0005509	calcium ion binding
LOC5568895	796.415	-1.0067	0.344008	-2.92638	0.00342932	0.0304091	AAEL007220	Fatty acyl-CoA reductase [Source:UniProtKB/TrEMBL;Acc:A0A1S4FFZ9]			GO:0006629,GO:0016020,GO:0016021,GO:0016491,GO:0055114,GO:0080019,GO:0102965	lipid metabolic process,membrane,integral component of membrane,oxidoreductase activity,oxidation-reduction process,fatty-acyl-CoA reductase (alcohol-forming) activity,alcohol-forming fatty acyl-CoA reductase activity
LOC110679141	927.427	-0.625079	0.213613	-2.92622	0.00343111	0.0304091	AAEL023409				GO:0005887,GO:0008519,GO:0015696,GO:0016020,GO:0016021,GO:0072488	integral component of plasma membrane,ammonium transmembrane transporter activity,ammonium transport,membrane,integral component of membrane,ammonium transmembrane transport
LOC5578111	187.111	-0.612378	0.209393	-2.92453	0.00344972	0.0305549	AAEL003444	caspase (short) [Source:VB Community Annotation]	CASPS19		GO:0004197,GO:0006508,GO:0006915,GO:0008233,GO:0008234,GO:0016787	cysteine-type endopeptidase activity,proteolysis,apoptotic process,peptidase activity,cysteine-type peptidase activity,hydrolase activity
LOC5578996	1116.86	-0.458511	0.156809	-2.92401	0.00345557	0.0305766	AAEL003777				GO:0006914,GO:0034045	autophagy,phagophore assembly site membrane
LOC5578025	430.095	0.941857	0.322121	2.92393	0.00345647	0.0305766	AAEL003399	cytochrome P450 [Source:VB Community Annotation]	CYP4H30		GO:0004497,GO:0005506,GO:0016491,GO:0016705,GO:0020037,GO:0046872,GO:0055114	monooxygenase activity,iron ion binding,oxidoreductase activity,oxidoreductase activity, acting on paired donors, with incorporation or reduction of molecular oxygen,heme binding,metal ion binding,oxidation-reduction process
LOC5572993	163.561	0.593255	0.202941	2.92329	0.00346358	0.0306205	AAEL001920				GO:0005515	protein binding
LOC23687731	40.6592	1.00191	0.343003	2.921	0.00348909	0.0308268	AAEL017311				GO:0005506,GO:0005777,GO:0009055,GO:0016491,GO:0022900,GO:0046872,GO:0050660,GO:0051536,GO:0051537,GO:0055114,GO:0071949	iron ion binding,peroxisome,electron transfer activity,oxidoreductase activity,electron transport chain,metal ion binding,flavin adenine dinucleotide binding,iron-sulfur cluster binding,2 iron, 2 sulfur cluster binding,oxidation-reduction process,FAD binding
LOC5579326	1218.58	0.439528	0.150528	2.91991	0.00350131	0.0309155	AAEL015575	mitochondrial import inner membrane translocase subunit tim17 [Source:VB Community Annotation]			GO:0016020,GO:0016021	membrane,integral component of membrane
LOC110674873	80.4782	-1.07533	0.368739	-2.91624	0.00354276	0.0312621	AAEL023750
LOC23687827	95.7668	0.715954	0.245765	2.91317	0.00357784	0.0315521	AAEL025574
LOC5567573	62.0522	0.782465	0.268634	2.91275	0.00358259	0.0315743	AAEL006164				GO:0016020,GO:0016021	membrane,integral component of membrane
LOC5568284	695.052	-0.60463	0.207651	-2.91176	0.00359402	0.0316554	AAEL006711				GO:0005739,GO:0005740,GO:0016020,GO:0016021,GO:0043065	mitochondrion,mitochondrial envelope,membrane,integral component of membrane,positive regulation of apoptotic process
LOC110674853	5.87023	-3.37412	1.15965	-2.90961	0.00361881	0.031854	AAEL025085				GO:0005515	protein binding
LOC110674289	64.9769	0.804035	0.276489	2.90802	0.00363729	0.0319969	AAEL021015				GO:0008083	growth factor activity
LOC5577114	674.234	-0.364349	0.125357	-2.90648	0.00365515	0.0321109	AAEL021798				GO:0005086,GO:0015031,GO:0032012	ARF guanyl-nucleotide exchange factor activity,protein transport,regulation of ARF protein signal transduction
LOC5579351	799.403	-0.410403	0.141204	-2.90646	0.00365544	0.0321109	AAEL015543				GO:0003676	nucleic acid binding
LOC5579803	84.3803	0.84802	0.291784	2.90632	0.00365703	0.0321109	AAEL003967	calpain 4, 6, 7, invertebrate [Source:VB Community Annotation]			GO:0004198,GO:0006508	calcium-dependent cysteine-type endopeptidase activity,proteolysis
LOC5579480	521.757	-0.464706	0.159962	-2.90511	0.00367123	0.0322116	AAEL015314	cAMP-dependent protein kinase type ii regulatory subunit [Source:VB Community Annotation]			GO:0001932,GO:0005952,GO:0008603,GO:0016301,GO:0016310,GO:0030552,GO:2000479	regulation of protein phosphorylation,cAMP-dependent protein kinase complex,cAMP-dependent protein kinase regulator activity,kinase activity,phosphorylation,cAMP binding,regulation of cAMP-dependent protein kinase activity
LOC5575603	1691.99	-0.926099	0.3188	-2.90496	0.00367304	0.0322116	AAEL011936
LOC5574603	347.247	0.435108	0.149806	2.90447	0.00367876	0.0322419	AAEL002415	pinch [Source:VB Community Annotation]			GO:0046872	metal ion binding
LOC5572040	531.196	0.359147	0.123694	2.90351	0.00369004	0.0323208	AAEL000226
LOC5570370	446.449	-0.510021	0.175789	-2.90132	0.00371597	0.032512	AAEL008275
LOC5563968	18.0223	-3.09152	1.06558	-2.90124	0.00371684	0.032512	AAEL004030
LOC5580046	328.344	-0.601702	0.207406	-2.90108	0.00371874	0.032512	AAEL010226	daughterless [Source:VB Community Annotation]	da		GO:0046983	protein dimerization activity
LOC5570447	92.8624	-1.83587	0.633037	-2.9001	0.00373046	0.0325945	AAEL008350				GO:0003677,GO:0003700,GO:0006357,GO:0046983	DNA binding,DNA-binding transcription factor activity,regulation of transcription by RNA polymerase II,protein dimerization activity
LOC110679022	432.324	-0.398274	0.137366	-2.89936	0.00373924	0.0326511	AAEL027644				GO:0016020,GO:0016021	membrane,integral component of membrane
LOC5574313	696.673	-0.495598	0.170954	-2.89901	0.00374345	0.0326678	AAEL011079	C-Type Lectin (CTL) - mannose binding. [Source:VB Community Annotation]	CTLMA10
LOC5579065	250.24	-0.600794	0.207286	-2.89839	0.00375083	0.0327121	AAEL014003				GO:0005515	protein binding
LOC5567571	157.786	-0.855298	0.295277	-2.8966	0.00377236	0.0328797	AAEL018112				GO:0005515	protein binding
LOC5573857	17.9947	-2.17723	0.751744	-2.89624	0.00377667	0.0328971	AAEL010775				GO:0004970,GO:0015276,GO:0016020,GO:0016021,GO:0034220	ionotropic glutamate receptor activity,ligand-gated ion channel activity,membrane,integral component of membrane,ion transmembrane transport
LOC5568354	36.5799	-1.02287	0.353379	-2.89454	0.00379709	0.0330383	AAEL026530				GO:0005515	protein binding
LOC5575321	1070.63	-0.480855	0.166127	-2.89451	0.00379753	0.0330383	AAEL002597				GO:0007343,GO:0033011,GO:0035038,GO:0035039,GO:0050699	egg activation,perinuclear theca,female pronucleus assembly,male pronucleus assembly,WW domain binding
LOC5573285	296.074	-0.409412	0.141462	-2.89415	0.00380192	0.0330544	AAEL010378				GO:0005515,GO:0007605,GO:0050953,GO:0050957	protein binding,sensory perception of sound,sensory perception of light stimulus,equilibrioception
LOC5579056	72.4354	0.712684	0.246265	2.89397	0.00380403	0.0330544	AAEL013996				GO:0003676,GO:0005634,GO:0008270,GO:0046872	nucleic acid binding,nucleus,zinc ion binding,metal ion binding
LOC110678708	2.74339	-4.83805	1.672	-2.89357	0.00380891	0.0330765	AAEL024801
LOC5566115	77.357	-0.950921	0.328672	-2.89323	0.00381305	0.0330923	AAEL005200				GO:0016787,GO:0052689	hydrolase activity,carboxylic ester hydrolase activity
LOC5566467	433.629	0.439185	0.151876	2.89173	0.00383126	0.03323	AAEL005417	annexin x [Source:VB Community Annotation]			GO:0005509,GO:0005544	calcium ion binding,calcium-dependent phospholipid binding
LOC5565034	5.93638	-4.01373	1.38844	-2.89082	0.00384243	0.033276	AAEL004557	sulfotransferase (sult) [Source:VB Community Annotation]			GO:0008146	sulfotransferase activity
LOC5571615	232.547	0.518752	0.179452	2.89076	0.00384314	0.033276	AAEL009202	DNA-directed RNA polymerase III subunit [Source:UniProtKB/TrEMBL;Acc:Q16WK0]			GO:0003899,GO:0005634,GO:0005666,GO:0006383	DNA-directed 5'-3' RNA polymerase activity,nucleus,RNA polymerase III complex,transcription by RNA polymerase III
LOC5572641	260.294	-0.426906	0.147685	-2.89066	0.00384429	0.033276	AAEL001850				GO:0016020,GO:0016021	membrane,integral component of membrane
LOC5574612	1232.6	0.413713	0.143127	2.89053	0.00384593	0.033276	AAEL011255	GTP-binding protein-invertebrate [Source:VB Community Annotation]			GO:0000166,GO:0005525,GO:0005634	nucleotide binding,GTP binding,nucleus
LOC5579980	133.564	-4.30104	1.48877	-2.88899	0.0038648	0.0334154	AAEL007739	pupal cuticle protein, putative [Source:VB Community Annotation]			GO:0042302	structural constituent of cuticle
LOC5566295	2.85407	-4.90953	1.69949	-2.88883	0.00386675	0.0334154	AAEL018121				GO:0005515	protein binding
LOC5577909	155.986	0.756995	0.262121	2.88796	0.00387744	0.0334875	AAEL003355				GO:0003676	nucleic acid binding
LOC5570164	211.162	0.522358	0.180957	2.88665	0.00389368	0.0336072	AAEL014153				GO:0004045,GO:0016787	aminoacyl-tRNA hydrolase activity,hydrolase activity
LOC5569652	975.759	0.410305	0.142151	2.8864	0.00389671	0.0336129	AAEL022067
LOC5571528	250.725	0.556058	0.192731	2.88514	0.00391234	0.0337273	AAEL009126	cytochrome P450 [Source:VB Community Annotation]	CYP6N6		GO:0004497,GO:0005506,GO:0016491,GO:0016705,GO:0020037,GO:0043231,GO:0046872,GO:0055114	monooxygenase activity,iron ion binding,oxidoreductase activity,oxidoreductase activity, acting on paired donors, with incorporation or reduction of molecular oxygen,heme binding,intracellular membrane-bounded organelle,metal ion binding,oxidation-reduction process
LOC5575338	199.016	-0.476857	0.165317	-2.8845	0.0039203	0.0337754	AAEL002615	Leucine-rich transmembrane protein [Source:UniProtKB/TrEMBL;Acc:A0A1S4F2H8]			GO:0005515,GO:0016020,GO:0016021	protein binding,membrane,integral component of membrane
LOC5578207	143.314	0.999462	0.34657	2.88387	0.00392824	0.0338233	AAEL003462	aromatic amino acid decarboxylase [Source:VB Community Annotation]			GO:0003824,GO:0006520,GO:0016829,GO:0016831,GO:0019752,GO:0030170	catalytic activity,cellular amino acid metabolic process,lyase activity,carboxy-lyase activity,carboxylic acid metabolic process,pyridoxal phosphate binding
LOC5578261	592.964	-0.684944	0.237525	-2.88367	0.00393072	0.0338242	AAEL003494	goodpasture antigen-binding protein [Source:VB Community Annotation]			GO:0008289	lipid binding
LOC5575312	2826.59	-0.621686	0.215618	-2.88328	0.00393555	0.0338419	AAEL002627				GO:0005576,GO:0008061	extracellular region,chitin binding
LOC5565316	168.045	0.551634	0.191332	2.88312	0.00393754	0.0338419	AAEL004726				GO:0005634,GO:0005730	nucleus,nucleolus
LOC5576337	390.491	0.426538	0.147965	2.8827	0.00394287	0.0338672	AAEL000395	Ultra spiracleisoform A nuclear receptor [Source:VB Community Annotation]	USP		GO:0003677,GO:0003700,GO:0003707,GO:0005634,GO:0006355,GO:0008270,GO:0042025,GO:0043401,GO:0043565,GO:0046872	DNA binding,DNA-binding transcription factor activity,steroid hormone receptor activity,nucleus,regulation of transcription, DNA-templated,zinc ion binding,host cell nucleus,steroid hormone mediated signaling pathway,sequence-specific DNA binding,metal ion binding
LOC5578292	89.0257	0.667398	0.231586	2.88186	0.00395339	0.033937	AAEL013611	AMP dependent ligase [Source:VB Community Annotation]			GO:0003824	catalytic activity
LOC23687404	63359.5	0.394007	0.136734	2.88155	0.00395726	0.0339497	AAEL016984	Glyceraldehyde-3-phosphate dehydrogenase [Source:UniProtKB/TrEMBL;Acc:J9HYM2]			GO:0000166,GO:0004365,GO:0006006,GO:0006096,GO:0016491,GO:0016620,GO:0050661,GO:0051287,GO:0055114	nucleotide binding,glyceraldehyde-3-phosphate dehydrogenase (NAD+) (phosphorylating) activity,glucose metabolic process,glycolytic process,oxidoreductase activity,oxidoreductase activity, acting on the aldehyde or oxo group of donors, NAD or NADP as acceptor,NADP binding,NAD binding,oxidation-reduction process
LOC5570208	322.196	0.397311	0.13791	2.88094	0.00396491	0.0339948	AAEL008169	40S ribosomal protein S12 [Source:VB Community Annotation]	RpS12		GO:0003735,GO:0005840,GO:0006412,GO:0015935	structural constituent of ribosome,ribosome,translation,small ribosomal subunit
LOC5569642	126.204	0.717992	0.249318	2.87983	0.00397895	0.0340946	AAEL007789	alkyldihydroxyacetonephosphate synthase [Source:VB Community Annotation]			GO:0003824,GO:0005777,GO:0006629,GO:0008609,GO:0008610,GO:0008611,GO:0016491,GO:0016740,GO:0050660,GO:0055114,GO:0071949	catalytic activity,peroxisome,lipid metabolic process,alkylglycerone-phosphate synthase activity,lipid biosynthetic process,ether lipid biosynthetic process,oxidoreductase activity,transferase activity,flavin adenine dinucleotide binding,oxidation-reduction process,FAD binding
LOC5574730	196.278	0.864699	0.30039	2.87859	0.00399463	0.0342084	AAEL011368	sugar transporter [Source:VB Community Annotation]			GO:0016020,GO:0016021,GO:0022857,GO:0055085	membrane,integral component of membrane,transmembrane transporter activity,transmembrane transport
LOC5566749	25.1435	-1.28762	0.447509	-2.87732	0.00401075	0.0343257	AAEL005602				GO:0005515	protein binding
LOC5574915	7121.29	-0.41769	0.145217	-2.87632	0.00402346	0.0344138	AAEL011520	sucrose transport protein [Source:VB Community Annotation]			GO:0016020,GO:0016021,GO:0022857,GO:0055085	membrane,integral component of membrane,transmembrane transporter activity,transmembrane transport
LOC5565656	29.0245	-8.24719	2.86799	-2.8756	0.00403262	0.0344714	AAEL004915
LOC5570251	64.5848	-2.21834	0.771568	-2.8751	0.00403896	0.0345048	AAEL008205
LOC5569595	113.078	-0.903332	0.314244	-2.87462	0.00404509	0.0345348	AAEL001245	heterogeneous nuclear ribonucleoprotein [Source:VB Community Annotation]			GO:0003676,GO:0003723	nucleic acid binding,RNA binding
LOC5573209	290.005	-0.461042	0.160393	-2.87445	0.00404733	0.0345348	AAEL022977
LOC5575639	168.121	0.692085	0.240943	2.87241	0.00407357	0.0347378	AAEL026043				GO:0004930,GO:0007165,GO:0007186,GO:0016020,GO:0016021	G protein-coupled receptor activity,signal transduction,G protein-coupled receptor signaling pathway,membrane,integral component of membrane
LOC5569097	597.699	0.471547	0.164421	2.86792	0.00413175	0.0352128	AAEL007356
LOC5572907	414.393	0.434025	0.151416	2.86644	0.00415112	0.0353567	AAEL010118	kelch repeat protein [Source:VB Community Annotation]			GO:0005515	protein binding
LOC5578774	323.754	0.618987	0.216178	2.86332	0.00419226	0.0356857	AAEL003656
LOC5574054	624.259	0.806664	0.28181	2.86244	0.00420395	0.0357638	AAEL010884	ADP,ATP carrier protein [Source:VB Community Annotation]			GO:0005347,GO:0005471,GO:0005743,GO:0015867,GO:0016020,GO:0016021,GO:0022857,GO:0055085,GO:0140021,GO:1990544	ATP transmembrane transporter activity,ATP:ADP antiporter activity,mitochondrial inner membrane,ATP transport,membrane,integral component of membrane,transmembrane transporter activity,transmembrane transport,mitochondrial ADP transmembrane transport,mitochondrial ATP transmembrane transport
LOC5578562	2789.98	0.445675	0.155728	2.86188	0.00421133	0.0358051	AAEL019589				GO:0000166,GO:0004672,GO:0004674,GO:0004689,GO:0005516,GO:0005524,GO:0005964,GO:0005975,GO:0005977,GO:0005978,GO:0006468,GO:0016301,GO:0016310	nucleotide binding,protein kinase activity,protein serine/threonine kinase activity,phosphorylase kinase activity,calmodulin binding,ATP binding,phosphorylase kinase complex,carbohydrate metabolic process,glycogen metabolic process,glycogen biosynthetic process,protein phosphorylation,kinase activity,phosphorylation
LOC5565856	73.7167	0.808585	0.282661	2.86061	0.0042282	0.0359271	AAEL005040	E3 ubiquitin-protein ligase [Source:UniProtKB/TrEMBL;Acc:Q17BB8]			GO:0005515,GO:0005634,GO:0005737,GO:0006511,GO:0007275,GO:0008270,GO:0016567,GO:0016740,GO:0042025,GO:0046872	protein binding,nucleus,cytoplasm,ubiquitin-dependent protein catabolic process,multicellular organism development,zinc ion binding,protein ubiquitination,transferase activity,host cell nucleus,metal ion binding
LOC5571855	132.072	-0.558664	0.195351	-2.8598	0.00423914	0.0359985	AAEL026761
LOC5574706	361.863	-0.414103	0.144856	-2.85873	0.00425342	0.0360981	AAEL011347
LOC5565223	703.351	0.564561	0.197536	2.85801	0.0042631	0.0361587	AAEL027866				GO:0005267,GO:0006811,GO:0016020,GO:0016021,GO:0071805	potassium channel activity,ion transport,membrane,integral component of membrane,potassium ion transmembrane transport
LOC5569942	76.2761	0.720602	0.252201	2.85725	0.00427331	0.0362035	AAEL008048				GO:0016020,GO:0016021	membrane,integral component of membrane
LOC5565109	577.377	-0.469479	0.164312	-2.85724	0.00427348	0.0362035	AAEL004591				GO:0005085,GO:0005089,GO:0035023	guanyl-nucleotide exchange factor activity,Rho guanyl-nucleotide exchange factor activity,regulation of Rho protein signal transduction
LOC5578380	1925.72	0.438186	0.153391	2.85667	0.00428112	0.0362068	AAEL013656	bm-40 precursor [Source:VB Community Annotation]			GO:0005509,GO:0005518,GO:0005615,GO:0062023	calcium ion binding,collagen binding,extracellular space,collagen-containing extracellular matrix
LOC5575993	44905.2	0.359455	0.125831	2.85665	0.00428134	0.0362068	AAEL002759	tropomyosin invertebrate [Source:VB Community Annotation]
LOC5575507	812.618	0.805846	0.282096	2.85664	0.00428151	0.0362068	AAEL020097
LOC5577193	5935.95	0.494325	0.173155	2.85482	0.00430612	0.0363932	AAEL013075				GO:0000413,GO:0003755,GO:0016853	protein peptidyl-prolyl isomerization,peptidyl-prolyl cis-trans isomerase activity,isomerase activity
LOC5575470	221.771	0.481179	0.168623	2.85358	0.00432293	0.0365136	AAEL011850	cytochrome P450 [Source:VB Community Annotation]	CYP315A1		GO:0004497,GO:0005506,GO:0016705,GO:0020037,GO:0055114	monooxygenase activity,iron ion binding,oxidoreductase activity, acting on paired donors, with incorporation or reduction of molecular oxygen,heme binding,oxidation-reduction process
LOC5571983	1224.9	-0.337383	0.118304	-2.85182	0.00434697	0.0366725	AAEL025906				GO:0004416,GO:0016787,GO:0019243,GO:0046872	hydroxyacylglutathione hydrolase activity,hydrolase activity,methylglyoxal catabolic process to D-lactate via S-lactoyl-glutathione,metal ion binding
LOC5576901	446.767	0.405434	0.142175	2.85165	0.00434924	0.0366725
LOC23687418	58.5794	-1.261	0.442204	-2.85164	0.00434949	0.0366725	AAEL016998				GO:0004190,GO:0004222,GO:0006508,GO:0008233,GO:0008237	aspartic-type endopeptidase activity,metalloendopeptidase activity,proteolysis,peptidase activity,metallopeptidase activity
LOC5577378	47.4349	0.92487	0.324449	2.85059	0.00436388	0.036772	AAEL000420	cathepsin o [Source:VB Community Annotation]			GO:0006508,GO:0008234,GO:0016020,GO:0016021	proteolysis,cysteine-type peptidase activity,membrane,integral component of membrane
LOC5571203	229.646	-0.469898	0.164862	-2.85024	0.00436857	0.0367897	AAEL008898	sulfotransferase (sult) [Source:VB Community Annotation]			GO:0008146	sulfotransferase activity
LOC5565120	572.768	0.348215	0.122228	2.8489	0.00438705	0.0369234	AAEL014733	nuclear pore complex protein nup214 [Source:VB Community Annotation]
LOC110677089	225.19	-0.457563	0.160634	-2.84849	0.00439274	0.0369338	AAEL024367				GO:0003676,GO:0005634,GO:0008270,GO:0046872	nucleic acid binding,nucleus,zinc ion binding,metal ion binding
LOC5576893	90.6828	-2.89521	1.01642	-2.84844	0.00439348	0.0369338	AAEL020007
LOC5577586	18.9373	-1.68456	0.591662	-2.84717	0.00441098	0.037059	AAEL021151				GO:0005515,GO:0005879,GO:0005929,GO:0018095,GO:0030030,GO:0042073,GO:0042995	protein binding,axonemal microtubule,cilium,protein polyglutamylation,cell projection organization,intraciliary transport,cell projection
LOC5564812	454.596	-0.418112	0.146867	-2.84688	0.00441502	0.037071	AAEL021353				GO:0000166,GO:0004672,GO:0004713,GO:0004715,GO:0005515,GO:0005524,GO:0005737,GO:0006468,GO:0016301,GO:0016310,GO:0016740,GO:0018108	nucleotide binding,protein kinase activity,protein tyrosine kinase activity,non-membrane spanning protein tyrosine kinase activity,protein binding,ATP binding,cytoplasm,protein phosphorylation,kinase activity,phosphorylation,transferase activity,peptidyl-tyrosine phosphorylation
LOC5577045	176.976	0.562842	0.197729	2.84653	0.00441982	0.0370895	AAEL012962	DEAD box ATP-dependent RNA helicase [Source:VB Community Annotation]			GO:0000166,GO:0003676,GO:0003724,GO:0004386,GO:0005524,GO:0016787	nucleotide binding,nucleic acid binding,RNA helicase activity,helicase activity,ATP binding,hydrolase activity
LOC5569889	118.826	-0.642618	0.225842	-2.84543	0.00443512	0.0371947	AAEL027567				GO:0005737,GO:0005829,GO:0005886,GO:0016020	cytoplasm,cytosol,plasma membrane,membrane
LOC110676983	8322.51	1.7738	0.623426	2.84525	0.00443761	0.0371947	AAEL023485
LOC5578710	118.787	0.715978	0.251666	2.84495	0.00444178	0.0372078	AAEL013823	calcium/calmodulin dependent protein kinase ii [Source:VB Community Annotation]			GO:0000166,GO:0004672,GO:0004674,GO:0004683,GO:0005516,GO:0005524,GO:0006468,GO:0016020,GO:0016021,GO:0016301,GO:0016310	nucleotide binding,protein kinase activity,protein serine/threonine kinase activity,calmodulin-dependent protein kinase activity,calmodulin binding,ATP binding,protein phosphorylation,membrane,integral component of membrane,kinase activity,phosphorylation
LOC110677132	309.375	-1.39227	0.489517	-2.84417	0.00445276	0.0372777	AAEL026796
LOC23687995	597.756	-0.368034	0.129458	-2.84288	0.00447077	0.0374065	AAEL012203				GO:0003824,GO:0005515,GO:0006886,GO:0009058,GO:0016740,GO:0030170	catalytic activity,protein binding,intracellular protein transport,biosynthetic process,transferase activity,pyridoxal phosphate binding
LOC110677635	2026.81	-0.618334	0.217543	-2.84235	0.00447824	0.037447	AAEL023743
LOC110675542	24.5993	-1.20402	0.423895	-2.84037	0.00450611	0.0376578	AAEL023449
LOC110680617	28.5913	1.27862	0.45046	2.83848	0.00453296	0.0378599	AAEL026549
LOC5566929	5958.66	0.908887	0.320367	2.83702	0.00455372	0.038011	AAEL005711	protein serine/threonine kinase, putative [Source:VB Community Annotation]
LOC110676630	15.5044	-1.68561	0.594215	-2.8367	0.00455829	0.0380268	AAEL023206
LOC5575238	6467.35	0.400221	0.141103	2.83638	0.00456284	0.0380424	AAEL011708	heat shock protein [Source:VB Community Annotation]			GO:0000166,GO:0005524,GO:0006457,GO:0051082	nucleotide binding,ATP binding,protein folding,unfolded protein binding
LOC5579208	91.0992	-0.62666	0.220978	-2.83585	0.00457037	0.0380762	AAEL014046	sex-determining protein fem-1 [Source:VB Community Annotation]			GO:0005515	protein binding
LOC5564809	1753.45	0.51758	0.182522	2.83572	0.00457225	0.0380762	AAEL014630	cytochrome C1 heme lyase [Source:VB Community Annotation]			GO:0004408,GO:0005739,GO:0005743,GO:0016020,GO:0016829,GO:0046872	holocytochrome-c synthase activity,mitochondrion,mitochondrial inner membrane,membrane,lyase activity,metal ion binding
LOC5576540	909.71	0.448338	0.158121	2.83541	0.0045767	0.038082	AAEL012595
LOC5571657	17.5717	-1.97032	0.694941	-2.83523	0.00457929	0.038082	AAEL001637				GO:0046983	protein dimerization activity
LOC5564920	938.721	0.469168	0.165485	2.83511	0.00458099	0.038082	AAEL004493	ribosome biogenesis protein tsr1 (20S rRNA accumulation protein 1) [Source:VB Community Annotation]			GO:0005634,GO:0005730,GO:0042254	nucleus,nucleolus,ribosome biogenesis
LOC5570788	1301.5	0.372677	0.131463	2.83484	0.00458486	0.0380918	AAEL008556	prp4 [Source:VB Community Annotation]			GO:0004672,GO:0005524,GO:0006468	protein kinase activity,ATP binding,protein phosphorylation
LOC5565610	90.5263	-0.905761	0.319639	-2.8337	0.00460122	0.0382054	AAEL004881	adam [Source:VB Community Annotation]			GO:0004222,GO:0006508,GO:0008237	metalloendopeptidase activity,proteolysis,metallopeptidase activity
LOC5575308	4244.73	-0.894727	0.315802	-2.83319	0.00460861	0.0382445	AAEL002613				GO:0005576,GO:0008061	extracellular region,chitin binding
LOC5570414	862.861	0.398671	0.140744	2.8326	0.00461711	0.0382926	AAEL021996
LOC5564500	70.8842	1.01726	0.359169	2.83226	0.00462201	0.0383109	AAEL004281	Short-chain dehydrogenase [Source:UniProtKB/TrEMBL;Acc:A0A1S4F753]			GO:0016020,GO:0016021,GO:0016491,GO:0055114	membrane,integral component of membrane,oxidoreductase activity,oxidation-reduction process
LOC5572023	492.31	-0.396245	0.139931	-2.83172	0.00462987	0.0383445	AAEL000219	lactoylglutathione lyase [Source:VB Community Annotation]
LOC5579193	73.3545	-0.872586	0.308159	-2.83161	0.00463146	0.0383445	AAEL003890	cytochrome P450 [Source:VB Community Annotation]			GO:0004497,GO:0005506,GO:0016491,GO:0016705,GO:0020037,GO:0046872,GO:0055114	monooxygenase activity,iron ion binding,oxidoreductase activity,oxidoreductase activity, acting on paired donors, with incorporation or reduction of molecular oxygen,heme binding,metal ion binding,oxidation-reduction process
LOC5569486	828.871	0.320316	0.113164	2.83056	0.00464673	0.0384448	AAEL007668	mitochondrial ribosomal protein, S29, putative [Source:VB Community Annotation]	mRpS28		GO:0005739,GO:0005761,GO:0005840,GO:0006915,GO:0015935	mitochondrion,mitochondrial ribosome,ribosome,apoptotic process,small ribosomal subunit
LOC5572986	1373.68	0.39641	0.140054	2.8304	0.00464899	0.0384448	AAEL001928	Actin-1 [Source:UniProtKB/Swiss-Prot;Acc:P49128]	Act1		GO:0000166,GO:0005524,GO:0005737,GO:0005856	nucleotide binding,ATP binding,cytoplasm,cytoskeleton
LOC5573158	429.5	-2.40849	0.851117	-2.8298	0.00465778	0.0384951	AAEL002004	protein serine/threonine kinase, putative [Source:VB Community Annotation]
LOC5569832	11.2871	2.54417	0.899363	2.82885	0.00467149	0.0385859	AAEL007942	fibrinogen and fibronectin [Source:VB Community Annotation]
LOC5578584	156.887	-2.4485	0.866098	-2.82704	0.00469803	0.0387817	AAEL013770	zinc finger protein [Source:VB Community Annotation]			GO:0003676,GO:0005515,GO:0005634	nucleic acid binding,protein binding,nucleus
LOC5571059	408.453	-0.429881	0.15207	-2.82686	0.00470065	0.0387817	AAEL008793
LOC5568803	372.413	0.440037	0.155726	2.82571	0.00471765	0.0388885	AAEL001171	tRNA-dihydrouridine synthase [Source:VB Community Annotation]			GO:0002943,GO:0003824,GO:0008033,GO:0016491,GO:0017150,GO:0046872,GO:0050660,GO:0055114	tRNA dihydrouridine synthesis,catalytic activity,tRNA processing,oxidoreductase activity,tRNA dihydrouridine synthase activity,metal ion binding,flavin adenine dinucleotide binding,oxidation-reduction process
LOC110674034	1958.41	-0.306921	0.108621	-2.82561	0.00471906	0.0388885	AAEL025611
LOC110678025	94.9545	0.638924	0.226138	2.82538	0.0047225	0.0388943	AAEL026800
LOC5576725	240.934	0.55527	0.196581	2.82464	0.0047334	0.0389614	AAEL002964	brain chitinase and chia [Source:VB Community Annotation]			GO:0005975,GO:0008061,GO:0030246	carbohydrate metabolic process,chitin binding,carbohydrate binding
LOC5566916	658.818	-0.641322	0.2273	-2.82148	0.0047803	0.0393247	AAEL005696	cytochrome P450 [Source:VB Community Annotation]	CYP325X2		GO:0004497,GO:0005506,GO:0016491,GO:0016705,GO:0020037,GO:0046872,GO:0055114	monooxygenase activity,iron ion binding,oxidoreductase activity,oxidoreductase activity, acting on paired donors, with incorporation or reduction of molecular oxygen,heme binding,metal ion binding,oxidation-reduction process
LOC23687506	3.72332	4.39934	1.56017	2.81978	0.00480566	0.0394929	AAEL020828				GO:0003824,GO:0006099	catalytic activity,tricarboxylic acid cycle
LOC5572390	186.079	0.604849	0.214506	2.81974	0.00480631	0.0394929	AAEL009779	NBP2b protein, putative [Source:VB Community Annotation]
LOC5575304	529.894	-0.37154	0.131774	-2.81953	0.00480946	0.039496	AAEL019566				GO:0000166,GO:0004672,GO:0004674,GO:0005524,GO:0006468,GO:0016301,GO:0016310,GO:0042981	nucleotide binding,protein kinase activity,protein serine/threonine kinase activity,ATP binding,protein phosphorylation,kinase activity,phosphorylation,regulation of apoptotic process
LOC5569049	1012.4	-0.496868	0.176246	-2.81917	0.00481473	0.0395164	AAEL007342				GO:0005765,GO:0010008,GO:0016020,GO:0016021,GO:0046872	lysosomal membrane,endosome membrane,membrane,integral component of membrane,metal ion binding
LOC5567364	246.941	-0.570964	0.202563	-2.8187	0.00482181	0.0395493	AAEL006035				GO:0003746,GO:0005634,GO:0006368,GO:0006414,GO:0008023	translation elongation factor activity,nucleus,transcription elongation from RNA polymerase II promoter,translational elongation,transcription elongation factor complex
LOC5566523	126.093	-0.597348	0.211944	-2.81843	0.00482592	0.0395493	AAEL018341				GO:0004672,GO:0004713,GO:0005524,GO:0006468,GO:0016020,GO:0016021,GO:0018108	protein kinase activity,protein tyrosine kinase activity,ATP binding,protein phosphorylation,membrane,integral component of membrane,peptidyl-tyrosine phosphorylation
LOC5571204	2618.07	-0.33466	0.118749	-2.81821	0.00482927	0.0395493	AAEL026355				GO:0005515,GO:0005634	protein binding,nucleus
LOC5579528	243.491	0.455597	0.161664	2.81817	0.00482987	0.0395493	AAEL014227	innexin shaking-B [Source:VB Community Annotation]	shakB		GO:0005243,GO:0005886,GO:0005921,GO:0006811,GO:0009416,GO:0009881,GO:0016020,GO:0016021,GO:0016264,GO:0030054,GO:0055085	gap junction channel activity,plasma membrane,gap junction,ion transport,response to light stimulus,photoreceptor activity,membrane,integral component of membrane,gap junction assembly,cell junction,transmembrane transport
LOC5574637	1011.13	-0.297486	0.105576	-2.81775	0.0048361	0.0395774	AAEL011271	programmed cell death 6-interacting protein [Source:VB Community Annotation]			GO:0005515	protein binding
LOC110681298	129.799	-0.588696	0.208938	-2.81757	0.00483891	0.0395776	AAEL019734				GO:0004672,GO:0005524,GO:0006468	protein kinase activity,ATP binding,protein phosphorylation
LOC5578091	2.8556	-4.90938	1.74432	-2.81449	0.00488543	0.0399351	AAEL022878
LOC5575074	720.057	0.930946	0.33087	2.81363	0.00489851	0.0400191	AAEL011639	WAP four-disulfide core domain protein 2 precursor, putative [Source:VB Community Annotation]			GO:0005576,GO:0010466,GO:0030414	extracellular region,negative regulation of peptidase activity,peptidase inhibitor activity
LOC5565619	2185.76	0.489697	0.174058	2.8134	0.00490203	0.0400248	AAEL014899	short chain type dehydrogenase [Source:VB Community Annotation]			GO:0055114	oxidation-reduction process
LOC5578162	22.7817	-1.2018	0.427488	-2.8113	0.00493414	0.0402639	AAEL013544	snail protein, putative [Source:VB Community Annotation]			GO:0003676	nucleic acid binding
LOC110678734	71418	0.230358	0.0819582	2.81067	0.00494383	0.0403197	AAEL019403	Heat shock cognate 70 [Source:UniProtKB/TrEMBL;Acc:Q1HQZ5]			GO:0000166,GO:0005524	nucleotide binding,ATP binding
LOC110681125	25.6846	-1.51825	0.540725	-2.8078	0.00498809	0.0406574	AAEL026083
LOC5568338	35.69	-1.2668	0.451257	-2.80728	0.0049962	0.0407001	AAEL001060				GO:0005886,GO:0016020,GO:0016021	plasma membrane,membrane,integral component of membrane
LOC5575001	176.088	-3.20851	1.14339	-2.80615	0.00501371	0.0408194	AAEL002537
LOC5570053	584.724	-0.43893	0.156497	-2.80472	0.00503609	0.0409579	AAEL000204
LOC5568049	27.0997	-1.30841	0.466508	-2.80469	0.00503649	0.0409579	AAEL006496	steroid dehydrogenase [Source:VB Community Annotation]			GO:0016020,GO:0016021,GO:0016491,GO:0055114	membrane,integral component of membrane,oxidoreductase activity,oxidation-reduction process
LOC5564797	824.875	0.332105	0.118441	2.80397	0.00504771	0.0410256	AAEL004441	importin 9 (imp9) (ran-binding protein 9) [Source:VB Community Annotation]			GO:0005634,GO:0006886,GO:0008536	nucleus,intracellular protein transport,Ran GTPase binding
LOC5568093	1197.57	-0.788762	0.281322	-2.80376	0.00505099	0.0410289	AAEL006507				GO:0001510,GO:0008168,GO:0008171,GO:0008173,GO:0016740,GO:0032259	RNA methylation,methyltransferase activity,O-methyltransferase activity,RNA methyltransferase activity,transferase activity,methylation
LOC5569794	235.852	-0.905154	0.322918	-2.80304	0.00506227	0.041097	AAEL001299				GO:0016021	integral component of membrane
LOC5570176	221.194	-0.43332	0.154744	-2.80023	0.00510661	0.0414332	AAEL024563				GO:0000166,GO:0003724,GO:0004386,GO:0005524,GO:0016787	nucleotide binding,RNA helicase activity,helicase activity,ATP binding,hydrolase activity
LOC23687822	654.529	2.00037	0.714618	2.79922	0.0051227	0.0415401	AAEL017402
LOC110679223	6.77721	-2.80021	1.0007	-2.79826	0.0051378	0.0416388	AAEL023368
LOC110680809	117.637	-0.584696	0.208983	-2.79781	0.00514502	0.0416735	AAEL024170				GO:0046872	metal ion binding
LOC110677906	12.6069	-1.82983	0.654155	-2.79724	0.00515417	0.0417186	AAEL021107
LOC5578343	2537.12	0.358737	0.128254	2.79709	0.00515646	0.0417186	AAEL003514	centromere/microtubule binding protein cbf5 [Source:VB Community Annotation]			GO:0001522,GO:0003723,GO:0006396,GO:0009451,GO:0009982,GO:0016853	pseudouridine synthesis,RNA binding,RNA processing,RNA modification,pseudouridine synthase activity,isomerase activity
LOC5573683	5.95091	3.52398	1.26044	2.79583	0.00517672	0.0418117	AAEL010664	actin binding protein, putative [Source:VB Community Annotation]			GO:0046872	metal ion binding
LOC5568495	2.43376	4.79617	1.71548	2.79582	0.0051768	0.0418117	AAEL006906	NBP2b protein, putative [Source:VB Community Annotation]
LOC5573134	2.43376	4.79617	1.71548	2.79582	0.0051768	0.0418117	AAEL023073
LOC5571962	75.3866	-0.707461	0.253137	-2.79477	0.00519368	0.0419242	AAEL009445
LOC110679584	5.63403	-2.84143	1.01691	-2.79419	0.00520306	0.0419761	AAEL028032
LOC5568353	711.75	-0.510835	0.182855	-2.79366	0.00521149	0.0420202	AAEL001071	glutathione S-transferase (GSTD5) [Source:VB Community Annotation]	GSTD5		GO:0005515	protein binding
LOC5564765	4150.71	0.45737	0.163776	2.79266	0.0052277	0.042127	AAEL025977				GO:0005783,GO:0016020,GO:0016021	endoplasmic reticulum,membrane,integral component of membrane
LOC5564956	99.082	-0.671514	0.240537	-2.79173	0.00524278	0.0422058	AAEL024396				GO:0003677,GO:0003700,GO:0005634,GO:0006355,GO:0035329	DNA binding,DNA-binding transcription factor activity,nucleus,regulation of transcription, DNA-templated,hippo signaling
LOC5565562	536.05	-0.330317	0.118322	-2.79169	0.00524342	0.0422058	AAEL004839	cyclin t [Source:VB Community Annotation]			GO:0000079,GO:0005634,GO:0006351,GO:0006357,GO:0016538,GO:0042025	regulation of cyclin-dependent protein serine/threonine kinase activity,nucleus,transcription, DNA-templated,regulation of transcription by RNA polymerase II,cyclin-dependent protein serine/threonine kinase regulator activity,host cell nucleus
LOC5573440	136.212	-0.652209	0.233658	-2.7913	0.0052497	0.0422141	AAEL010477				GO:0016020,GO:0016021	membrane,integral component of membrane
LOC5580311	1151.07	-0.737263	0.264133	-2.79126	0.00525039	0.0422141	AAEL003014				GO:0003676	nucleic acid binding
LOC5577462	37.8808	1.16811	0.418519	2.79105	0.00525367	0.0422166	AAEL013211				GO:0000166,GO:0004371,GO:0005524,GO:0006071,GO:0016301,GO:0016310,GO:0016740,GO:0034012	nucleotide binding,glycerone kinase activity,ATP binding,glycerol metabolic process,kinase activity,phosphorylation,transferase activity,FAD-AMP lyase (cyclizing) activity
LOC5579472	3747.73	0.289355	0.103693	2.79049	0.00526286	0.0422665	AAEL007650	Chaperonin [Source:UniProtKB/TrEMBL;Acc:A0A1S4FHA0]			GO:0000166,GO:0005524,GO:0005737,GO:0005829,GO:0005832,GO:0006457,GO:0051082	nucleotide binding,ATP binding,cytoplasm,cytosol,chaperonin-containing T-complex,protein folding,unfolded protein binding
LOC5576693	44.5896	-0.879038	0.315055	-2.79011	0.00526897	0.0422685	AAEL012718	Putative progestin and adipoq receptor family member 4 [Source:UniProtKB/TrEMBL;Acc:A0A0P6ITR0]			GO:0016020,GO:0016021	membrane,integral component of membrane
LOC5572195	2637.76	0.284278	0.101888	2.79011	0.00526905	0.0422685	AAEL014715	Eukaryotic translation initiation factor 3 subunit L (eIF3l) [Source:VB Community Annotation]			GO:0001732,GO:0002183,GO:0003743,GO:0005515,GO:0005737,GO:0005852,GO:0006412,GO:0006413,GO:0016282,GO:0033290	formation of cytoplasmic translation initiation complex,cytoplasmic translational initiation,translation initiation factor activity,protein binding,cytoplasm,eukaryotic translation initiation factor 3 complex,translation,translational initiation,eukaryotic 43S preinitiation complex,eukaryotic 48S preinitiation complex
LOC110680243	37.2942	-2.23318	0.800737	-2.7889	0.0052887	0.0423905	AAEL021404
LOC5567469	603.16	0.396271	0.142093	2.78881	0.00529024	0.0423905	AAEL000950				GO:0042274	ribosomal small subunit biogenesis
LOC110677244	12.3238	1.95077	0.699644	2.78823	0.00529977	0.0424379	AAEL020317
LOC110679299	1075.85	0.405208	0.145336	2.78808	0.00530212	0.0424379	AAEL025647
LOC110679273	2.52837	-4.72476	1.69475	-2.78787	0.0053055	0.042441	AAEL026596
LOC110681181	87.3476	0.751801	0.269693	2.78761	0.00530977	0.0424513	AAEL025466
LOC5572898	67.2022	-0.886691	0.318215	-2.78646	0.00532878	0.0425793	AAEL010097				GO:0003723,GO:0042803,GO:0045450	RNA binding,protein homodimerization activity,bicoid mRNA localization
LOC5580212	115.325	-0.91701	0.329213	-2.78546	0.00534517	0.0426862	AAEL011926	brachyury [Source:VB Community Annotation]			GO:0003677,GO:0003700,GO:0005634,GO:0006355	DNA binding,DNA-binding transcription factor activity,nucleus,regulation of transcription, DNA-templated
LOC5577264	90.3409	-1.56833	0.563094	-2.7852	0.00534949	0.0426968	AAEL024424				GO:0005576,GO:0008061	extracellular region,chitin binding
LOC5580326	533.796	0.421543	0.151403	2.78424	0.00536531	0.042799	AAEL013072				GO:0003676,GO:0003723	nucleic acid binding,RNA binding
LOC5563588	439.646	0.420229	0.150959	2.78374	0.00537366	0.0428415	AAEL000001
LOC5569812	306.81	0.730825	0.262565	2.7834	0.00537923	0.0428618	AAEL001309
LOC5569983	86.7742	-0.719562	0.258577	-2.78278	0.00538961	0.0429205	AAEL008070				GO:0005576,GO:0007165,GO:0007589,GO:0008613	extracellular region,signal transduction,body fluid secretion,diuretic hormone activity
LOC5573186	410.763	0.436498	0.156892	2.78215	0.00540004	0.0429794	AAEL018281				GO:0016020,GO:0016021,GO:0046872	membrane,integral component of membrane,metal ion binding
LOC5566936	989.375	-0.329763	0.118583	-2.78087	0.00542142	0.0431255	AAEL005699	membrane protein tms1d [Source:VB Community Annotation]			GO:0006658,GO:0006665,GO:0016020,GO:0016021	phosphatidylserine metabolic process,sphingolipid metabolic process,membrane,integral component of membrane
LOC5569978	2351.27	-0.606379	0.218079	-2.78055	0.00542673	0.0431436	AAEL008069	notch [Source:VB Community Annotation]			GO:0005509,GO:0005515,GO:0006508,GO:0008236,GO:0016020,GO:0016021	calcium ion binding,protein binding,proteolysis,serine-type peptidase activity,membrane,integral component of membrane
LOC5577220	15.369	-1.68038	0.604505	-2.77977	0.00543974	0.0432228	AAEL003132	intraflagellar transport 52 homolog (protein NGD5) [Source:VB Community Annotation]			GO:0060271	cilium assembly
LOC5570624	421.051	0.496777	0.178847	2.77766	0.00547524	0.0434566	AAEL008427	smad nuclear interacting protein [Source:VB Community Annotation]			GO:0005515	protein binding
LOC5570987	8237.9	-0.885588	0.318826	-2.77765	0.00547528	0.0434566	AAEL008717
LOC5576722	14421.7	0.387956	0.139708	2.77691	0.00548779	0.0435254	AAEL027938				GO:0005525	GTP binding
LOC110675335	2.41121	4.78504	1.72324	2.77678	0.00549007	0.0435254	AAEL025714
LOC5568526	3274.49	0.318264	0.114648	2.77601	0.00550306	0.043604	AAEL006946	chaperonin [Source:VB Community Annotation]			GO:0000166,GO:0005524,GO:0005737,GO:0006457,GO:0051082	nucleotide binding,ATP binding,cytoplasm,protein folding,unfolded protein binding
LOC110678663	17.324	-2.24391	0.808523	-2.77532	0.0055147	0.0436718	AAEL020004				GO:0016020,GO:0016021	membrane,integral component of membrane
LOC5571806	17.8667	-1.64762	0.594118	-2.77322	0.0055505	0.0439309	AAEL009325
LOC5575347	11.2273	-3.55956	1.28369	-2.77291	0.00555583	0.0439486	AAEL002618	odorant binding protein OBP65 [Source:VB Community Annotation]	OBP65		GO:0005549	odorant binding
LOC5575549	38.5472	1.24081	0.447907	2.77025	0.00560139	0.0442844	AAEL002672	Matrix metalloproteinase [Source:UniProtKB/TrEMBL;Acc:A0A1S4F2E3]			GO:0004222,GO:0006508,GO:0008233,GO:0008237,GO:0008270,GO:0016787,GO:0031012,GO:0046872	metalloendopeptidase activity,proteolysis,peptidase activity,metallopeptidase activity,zinc ion binding,hydrolase activity,extracellular matrix,metal ion binding
LOC5565892	7214.11	0.351945	0.127089	2.76929	0.00561784	0.0443897	AAEL000713	reticulon/nogo [Source:VB Community Annotation]			GO:0005783,GO:0005789,GO:0016020,GO:0016021	endoplasmic reticulum,endoplasmic reticulum membrane,membrane,integral component of membrane
LOC5571624	224.836	-0.558282	0.201623	-2.76894	0.00562398	0.044394	AAEL009208				GO:0003676,GO:0005634,GO:0008270,GO:0046872	nucleic acid binding,nucleus,zinc ion binding,metal ion binding
LOC5580147	72.6758	1.31106	0.473495	2.7689	0.00562464	0.044394	AAEL002440	larval cuticle protein, putative [Source:VB Community Annotation]			GO:0042302	structural constituent of cuticle
LOC110675866	13.4558	1.69701	0.612986	2.76843	0.00563276	0.0444303	AAEL023302
LOC5576179	102.856	-0.671506	0.242573	-2.76827	0.00563549	0.0444303	AAEL012371				GO:0003677,GO:0005515	DNA binding,protein binding
LOC110681059	13.4616	-2.3145	0.83651	-2.76685	0.00566003	0.0445991	AAEL027155				GO:0080019	fatty-acyl-CoA reductase (alcohol-forming) activity
LOC5575179	3514.15	0.525779	0.19006	2.76639	0.00566815	0.0446383	AAEL000304
LOC5565578	454.104	-0.608633	0.220076	-2.76556	0.00568259	0.0447272	AAEL014893	cytochrome P450 [Source:VB Community Annotation]	CYP6BB2		GO:0004497,GO:0005506,GO:0016020,GO:0016021,GO:0016491,GO:0016705,GO:0020037,GO:0046872,GO:0055114	monooxygenase activity,iron ion binding,membrane,integral component of membrane,oxidoreductase activity,oxidoreductase activity, acting on paired donors, with incorporation or reduction of molecular oxygen,heme binding,metal ion binding,oxidation-reduction process
LOC5564538	170.72	-0.627494	0.226952	-2.76488	0.00569438	0.0447913	AAEL023825				GO:0003676	nucleic acid binding
LOC5570824	6469.51	-0.507739	0.183649	-2.76473	0.00569705	0.0447913	AAEL008600	zinc carboxypeptidase [Source:VB Community Annotation]			GO:0004180,GO:0004181,GO:0006508,GO:0008233,GO:0008237,GO:0008270,GO:0016787,GO:0046872	carboxypeptidase activity,metallocarboxypeptidase activity,proteolysis,peptidase activity,metallopeptidase activity,zinc ion binding,hydrolase activity,metal ion binding
LOC5564573	293.042	-1.37865	0.498714	-2.76442	0.00570247	0.0448092	AAEL014520	follistatin [Source:VB Community Annotation]			GO:0005515	protein binding
LOC5575307	2696.81	-0.441795	0.159957	-2.76196	0.00574554	0.045099	AAEL002625				GO:0005576,GO:0006030,GO:0008061	extracellular region,chitin metabolic process,chitin binding
LOC5571101	463.229	-0.358721	0.12988	-2.76195	0.00574571	0.045099	AAEL001520
LOC5572599	538.031	0.458624	0.166091	2.76127	0.00575764	0.0451678	AAEL009912				GO:0003723	RNA binding
LOC5572136	98.3389	0.580904	0.210425	2.76062	0.00576923	0.0452199	AAEL019673				GO:0005267,GO:0016020,GO:0071805	potassium channel activity,membrane,potassium ion transmembrane transport
LOC5564492	5222.96	0.358789	0.129971	2.76054	0.00577066	0.0452199	AAEL004294	dihydrolipoamide acetyltransferase component of pyruvate dehydrogenase [Source:VB Community Annotation]			GO:0004742,GO:0006090,GO:0016746,GO:0030523,GO:0045254	dihydrolipoyllysine-residue acetyltransferase activity,pyruvate metabolic process,transferase activity, transferring acyl groups,dihydrolipoamide S-acyltransferase activity,pyruvate dehydrogenase complex
LOC5563956	7.60571	-2.37882	0.862026	-2.75957	0.00578779	0.0452291	AAEL004013	glucose dehydrogenase [Source:VB Community Annotation]			GO:0016614,GO:0050660,GO:0055114	oxidoreductase activity, acting on CH-OH group of donors,flavin adenine dinucleotide binding,oxidation-reduction process
LOC5577291	3641.46	0.271286	0.0983082	2.75954	0.00578821	0.0452291	AAEL013144	Eukaryotic translation initiation factor 3 subunit I (eIF3i) [Source:VB Community Annotation]			GO:0001732,GO:0002183,GO:0003743,GO:0005515,GO:0005737,GO:0005852,GO:0006412,GO:0006413,GO:0016282,GO:0033290	formation of cytoplasmic translation initiation complex,cytoplasmic translational initiation,translation initiation factor activity,protein binding,cytoplasm,eukaryotic translation initiation factor 3 complex,translation,translational initiation,eukaryotic 43S preinitiation complex,eukaryotic 48S preinitiation complex
LOC5569472	382.034	0.466891	0.169192	2.75953	0.00578849	0.0452291	AAEL007656	receptor for activated C kinase, putative [Source:VB Community Annotation]			GO:0005515	protein binding
LOC5577425	530.729	0.492455	0.178457	2.75952	0.00578867	0.0452291	AAEL013171	heme peroxidase [Source:VB Community Annotation]	HPX2		GO:0004601,GO:0006979,GO:0020037,GO:0055114,GO:0098869	peroxidase activity,response to oxidative stress,heme binding,oxidation-reduction process,cellular oxidant detoxification
LOC110675555	2.44956	4.80403	1.74094	2.75944	0.0057901	0.0452291	AAEL020767
LOC5570223	135.837	-0.683299	0.247627	-2.75939	0.00579093	0.0452291	AAEL008157
LOC5572992	934.585	-0.437034	0.158402	-2.75902	0.00579751	0.0452556	AAEL001952	28 kDa heat- and acid-stable phosphoprotein (PDGF-associated protein), putative [Source:UniProtKB/TrEMBL;Acc:Q1HQX2]
LOC5578205	202.489	0.720378	0.261255	2.75737	0.00582683	0.0454595	AAEL003474				GO:0006479,GO:0008276	protein methylation,protein methyltransferase activity
LOC5570649	1547.33	-0.593271	0.215208	-2.75674	0.00583814	0.0455227	AAEL008467	cysteine synthase [Source:VB Community Annotation]			GO:0004122,GO:0005737,GO:0006535,GO:0008652,GO:0016829,GO:0019343,GO:0019344	cystathionine beta-synthase activity,cytoplasm,cysteine biosynthetic process from serine,cellular amino acid biosynthetic process,lyase activity,cysteine biosynthetic process via cystathionine,cysteine biosynthetic process
LOC5564334	656.031	-0.487845	0.177037	-2.7556	0.00585844	0.045656	AAEL022076				GO:0005515,GO:0016020,GO:0016021	protein binding,membrane,integral component of membrane
LOC5568848	550.793	0.328323	0.119161	2.75529	0.00586403	0.0456745	AAEL007158	nnp-1 protein (novel nuclear protein 1) (nop52) [Source:VB Community Annotation]			GO:0005634,GO:0006364,GO:0030688	nucleus,rRNA processing,preribosome, small subunit precursor
LOC5567139	1911.08	0.498847	0.181083	2.75479	0.00587291	0.0457186	AAEL005890
LOC5565742	155.268	0.750345	0.272419	2.75438	0.00588037	0.0457516	AAEL004948				GO:0004252,GO:0006508,GO:0008233,GO:0008236,GO:0016787	serine-type endopeptidase activity,proteolysis,peptidase activity,serine-type peptidase activity,hydrolase activity
LOC5580092	39.8603	-2.03118	0.737914	-2.75259	0.00591251	0.0459506	AAEL002177	serine-type enodpeptidase, [Source:VB Community Annotation]			GO:0004252,GO:0006508	serine-type endopeptidase activity,proteolysis
LOC5566592	216.314	0.423985	0.154034	2.75255	0.00591336	0.0459506	AAEL000782				GO:0005643,GO:0006913,GO:0015031,GO:0017056	nuclear pore,nucleocytoplasmic transport,protein transport,structural constituent of nuclear pore
LOC110679177	571.233	0.390614	0.141917	2.75242	0.00591565	0.0459506	AAEL025122				GO:0004190,GO:0006508,GO:0008233,GO:0016787	aspartic-type endopeptidase activity,proteolysis,peptidase activity,hydrolase activity
LOC5572473	534.865	-0.319521	0.116123	-2.75157	0.00593096	0.0460444	AAEL009823				GO:0005515,GO:0046872	protein binding,metal ion binding
LOC5576979	6487.68	0.333065	0.121071	2.75099	0.00594161	0.0461019	AAEL019720
LOC5566353	20.4077	-1.25125	0.455017	-2.7499	0.00596135	0.0462298	AAEL005336	d-3-phosphoglycerate dehydrogenase [Source:VB Community Annotation]			GO:0016491,GO:0016616,GO:0051287,GO:0055114	oxidoreductase activity,oxidoreductase activity, acting on the CH-OH group of donors, NAD or NADP as acceptor,NAD binding,oxidation-reduction process
LOC5572246	1567.43	-0.35698	0.12992	-2.7477	0.00600145	0.0465153	AAEL009689	serine protease [Source:VB Community Annotation]			GO:0004252,GO:0006508,GO:0008233,GO:0008236,GO:0016787	serine-type endopeptidase activity,proteolysis,peptidase activity,serine-type peptidase activity,hydrolase activity
LOC5569504	590.584	-0.471606	0.171682	-2.74697	0.0060149	0.0465942	AAEL018144				GO:0004672,GO:0005524,GO:0006468	protein kinase activity,ATP binding,protein phosphorylation
LOC5566015	455.505	-0.543291	0.197832	-2.74622	0.00602856	0.0466745	AAEL005111				GO:0016020,GO:0016021	membrane,integral component of membrane
LOC5567405	97.829	0.591147	0.215312	2.74554	0.00604112	0.0467463	AAEL006063	U3 small nucleolar ribonucleoprotein protein imp4 [Source:VB Community Annotation]
LOC5572265	2436.78	-0.271434	0.0988881	-2.74486	0.00605358	0.0468172	AAEL001769	DEAD box ATP-dependent RNA helicase [Source:VB Community Annotation]			GO:0000166,GO:0003676,GO:0003724,GO:0004386,GO:0005524,GO:0016787	nucleotide binding,nucleic acid binding,RNA helicase activity,helicase activity,ATP binding,hydrolase activity
LOC5564116	122.123	-0.66366	0.241893	-2.74361	0.00607676	0.0469669	AAEL004095	aldo-keto reductase [Source:VB Community Annotation]			GO:0016491,GO:0055114	oxidoreductase activity,oxidation-reduction process
LOC5578596	2417.92	-0.256723	0.0935764	-2.74346	0.00607954	0.0469669	AAEL013778	F-actin capping protein alpha [Source:VB Community Annotation]			GO:0003779,GO:0008290,GO:0051016,GO:0051693	actin binding,F-actin capping protein complex,barbed-end actin filament capping,actin filament capping
LOC5565300	2293.2	-0.309212	0.112743	-2.74264	0.00609481	0.0470425	AAEL028037				GO:0005739	mitochondrion
LOC5565374	48.8643	2.11946	0.7728	2.74258	0.00609595	0.0470425	AAEL004754
LOC5576671	375.086	-0.620417	0.226363	-2.7408	0.0061289	0.0472711	AAEL012704		SCP-2L3
LOC5568663	1518.89	-0.365855	0.133588	-2.73868	0.00616855	0.0475511	AAEL007011				GO:0005515	protein binding
LOC23687612	44.2978	0.882893	0.322461	2.73798	0.00618177	0.0476012	AAEL027547				GO:0003824,GO:0005634,GO:0008484,GO:0016787,GO:0046872	catalytic activity,nucleus,sulfuric ester hydrolase activity,hydrolase activity,metal ion binding
LOC23687723	44.2978	0.882893	0.322461	2.73798	0.00618177	0.0476012	AAEL017192				GO:0003824,GO:0008484	catalytic activity,sulfuric ester hydrolase activity
LOC5574328	1718.8	-0.311862	0.11391	-2.7378	0.0061851	0.0476012	AAEL019424				GO:0005515	protein binding
LOC5569968	11175.5	-0.433149	0.158234	-2.7374	0.0061926	0.0476331	AAEL020092				GO:0005737,GO:0009968	cytoplasm,negative regulation of signal transduction
LOC110676576	10.3493	-1.84393	0.673701	-2.73701	0.00619995	0.0476638	AAEL026637
LOC5578857	10082.7	-0.288784	0.105534	-2.73639	0.00621169	0.0476908	AAEL027402				GO:0005515	protein binding
LOC5579845	26.8354	1.27106	0.464536	2.7362	0.00621538	0.0476908	AAEL019981				GO:0016020,GO:0016021	membrane,integral component of membrane
LOC110680904	1517.19	-3.67877	1.34449	-2.73619	0.00621557	0.0476908	AAEL024580				GO:0016020,GO:0016021	membrane,integral component of membrane
LOC5570645	35.5069	-1.0764	0.393403	-2.73612	0.00621689	0.0476908	AAEL008450				GO:0005515,GO:0046872	protein binding,metal ion binding
LOC5573147	1088.27	0.791672	0.289466	2.73494	0.00623919	0.047836	AAEL002021	protein serine/threonine kinase, putative [Source:VB Community Annotation]
[truncated: 17,407 more rows]
