# Supplementary material for: Engineered Antiviral Sensor Targets Infected Mosquitoes
Source: bioRxiv preprint, doi:10.1101/2023.01.27.525922, version 1 (2023-01-27)
Supplement: Table S20 [file 525922_file22.xlsx]

## Sheet: Sheet1
CHIKV target sites
gRNA_ID	Target site (consensus sequences)
gRNA_CHIKV-1	atgaaagtcaactataatcacaacatctgc
gRNA_CHIKV-2	gtgtacactgcctgtgaccgccattgtgtc
gRNA_CHIKV-3	aatgcgcactacgaatgagtacaacaagcc
gRNA_CHIKV-4	ctgatcctggagacctcgtgttaacgtgct
